# Supplementary material for: TGFβ1-Induced Differentiation of Human Bone Marrow-Derived MSCs Is Mediated by Changes to the Actin Cytoskeleton
Source: Hindawi journal article supplement (doi:10.1155/2018/6913594), 2018-01-01
Supplement: f1 [file 6913594.f1.pdf]

# Supplementary Fig.1

1900 genes were uploaded to DAVID online software. KEGG pathway analysis showed many interested pathways which are upregulated after TGFb-1 treatment of hBMCs. Here we show the top most upregulated pathways which include key osteogenic pathways.

## KEGG-PATHWAYS FROM DAVID TGFb UP GENES

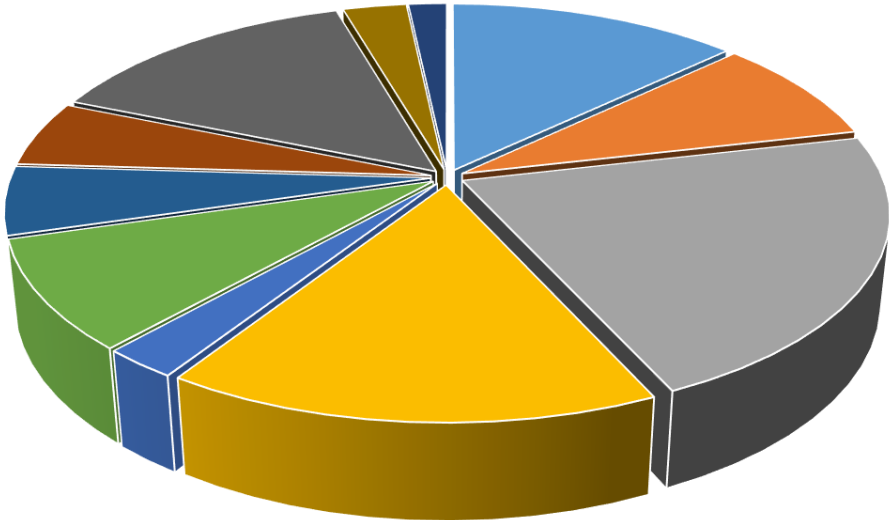

- Focal adhesion
- FoxO signaling pathway
- PI3K-Akt signaling pathway
- MAPK signaling pathway
- Glycine, serine and threonine metabolism
- Signaling pathways regulating pluripotency of stem cells
- ECM-receptor interaction
- TGF-beta signaling pathway
- Ras signaling pathway
- Endocrine and other factor-regulated calcium reabsorption
- Hedgehog signaling pathway
