# Supplementary material for: TGFβ1-Induced Differentiation of Human Bone Marrow-Derived MSCs Is Mediated by Changes to the Actin Cytoskeleton
Source: Stem Cells Int. 2018 Feb 15;2018:6913594. doi: 10.1155/2018/6913594 (PMC5832166; doi:10.1155/2018/6913594)
Supplement: Supplementary 2 — Table S1: whole genome microarray mRNA data showing gene ENTITIES for TG1 versus CNT DOWN 1298 genes. [file 6913594.f2.xlsx]

## Sheet: S. TABLE1   ALL ENTITIES  TG1 v
ProbeName	FC ([TG1] vs [CNT])	Log FC ([TG1] vs [CNT])	FC (abs) ([TG1] vs [CNT])	Regulation ([TG1] vs [CNT])	GeneName	GeneSymbol	ControlType	Description	EntrezGeneID	Go	Chromosome End Index_Avadis_	Chromosome Number_Avadis_	Chromosome Start Index_Avadis_	Chromosome Strand_Avadis_	Cytoband	GenbankAccession	GenomicCoordinates	RefSeqAccession	UniGeneID
A_23_P143178	-182.849	-7.51451	182.849	down	lipopolysaccharide binding protein	LBP	FALSE	Homo sapiens lipopolysaccharide binding protein (LBP), mRNA [NM_004139]	3929	GO:0005515|GO:0032755|GO:0034145|GO:0034142|GO:0070891|GO:0050830|GO:0043032|GO:0005615|GO:0032757|GO:0060265|GO:0002281|GO:0032496|GO:0044130|GO:0031663|GO:0008228|GO:0070062|GO:0009986|GO:0032760|GO:0042535|GO:0005102|GO:0032720|GO:0005576|GO:0006953|GO:0032722|GO:0002224|GO:0015920|GO:0002232|GO:0001530|GO:0050829|GO:0071223|GO:0006968|GO:0071222|GO:0045087|GO:0090023|GO:0032490	36995434	chr20	36993369	+	hs|20q11.23	NM_004139	chr20:36993369-36995434	NM_004139	Hs.154078
A_23_P102611	-152.413	-7.25185	152.413	down	WNT1 inducible signaling pathway protein 2	WISP2	FALSE	Homo sapiens WNT1 inducible signaling pathway protein 2 (WISP2), mRNA [NM_003881]	8839	GO:0007165|GO:0005886|GO:0007267|GO:0007155|GO:0005615|GO:0001558|GO:0070062|GO:0005520	43356406	chr20	43356347	+	hs|20q13.12	NM_003881	chr20:43356347-43356406	NM_003881	Hs.592145
A_33_P3271651	-76.7646	-6.26237	76.7646	down	major histocompatibility complex, class II, DP beta 1	HLA-DPB1	FALSE	Homo sapiens major histocompatibility complex, class II, DP beta 1 (HLA-DPB1), mRNA [NM_002121]	3115	GO:0032729|GO:0050852|GO:0012507|GO:0005886|GO:0009986|GO:0019221|GO:0031295|GO:0042613|GO:0005765|GO:0032588|GO:0030666|GO:0019886|GO:0000139|GO:0050870|GO:0042605|GO:0042102|GO:0071556|GO:0030669|GO:0010008|GO:0060333|GO:0030658	33052843	chr6	33052784	+	hs|6p21.32	NM_002121	chr6:33052784-33052843	NM_002121	Hs.485130
A_24_P148717	-74.2753	-6.21481	74.2753	down	chemokine (C-C motif) receptor 1	CCR1	FALSE	Homo sapiens chemokine (C-C motif) receptor 1 (CCR1), mRNA [NM_001295]	1230	GO:0071791|GO:0005515|GO:0005886|GO:0051928|GO:0019221|GO:0007267|GO:0006887|GO:0007204|GO:0019957|GO:0006955|GO:0006954|GO:0006935|GO:0004950|GO:0006816|GO:0070374|GO:0007155|GO:0070098|GO:0006874|GO:0002407|GO:0009611|GO:0045672|GO:0030502|GO:0005887|GO:0004435|GO:0007187|GO:0008152|GO:0010629|GO:0035717|GO:0016493|GO:0090026|GO:0007166|GO:0009897	46243888	chr3	46243829	-	hs|3p21.31	NM_001295	chr3:46243888-46243829	NM_001295	Hs.301921
A_32_P87697	-57.6317	-5.84879	57.6317	down	major histocompatibility complex, class II, DR alpha	HLA-DRA	FALSE	Homo sapiens major histocompatibility complex, class II, DR alpha (HLA-DRA), mRNA [NM_019111]	3122	GO:0050852|GO:0005886|GO:0019221|GO:0031295|GO:0005765|GO:0005764|GO:0019886|GO:0006955|GO:0042605|GO:0071556|GO:0070062|GO:0060333|GO:0030658|GO:0012507|GO:0009986|GO:0002506|GO:0002504|GO:0002503|GO:0042613|GO:0032588|GO:0030666|GO:0000139|GO:0050890|GO:0005887|GO:0031902|GO:0023026|GO:0030669|GO:0032395	32412507	chr6	32412448	+	hs|6p21.32	NM_019111	chr6:32412448-32412507	NM_019111	Hs.520048
A_23_P258769	-57.3053	-5.8406	57.3053	down	major histocompatibility complex, class II, DP beta 1	HLA-DPB1	FALSE	Homo sapiens major histocompatibility complex, class II, DP beta 1 (HLA-DPB1), mRNA [NM_002121]	3115	GO:0032729|GO:0050852|GO:0012507|GO:0005886|GO:0009986|GO:0019221|GO:0031295|GO:0042613|GO:0005765|GO:0032588|GO:0030666|GO:0019886|GO:0000139|GO:0050870|GO:0042605|GO:0042102|GO:0071556|GO:0030669|GO:0010008|GO:0060333|GO:0030658	33054418	chr6	33054359	+	hs|6p21.32	NM_002121	chr6:33054359-33054418	NM_002121	Hs.485130
A_24_P166443	-53.2196	-5.73389	53.2196	down	major histocompatibility complex, class II, DP beta 1	HLA-DPB1	FALSE	Homo sapiens major histocompatibility complex, class II, DP beta 1 (HLA-DPB1), mRNA [NM_002121]	3115	GO:0032729|GO:0050852|GO:0012507|GO:0005886|GO:0009986|GO:0019221|GO:0031295|GO:0042613|GO:0005765|GO:0032588|GO:0030666|GO:0019886|GO:0000139|GO:0050870|GO:0042605|GO:0042102|GO:0071556|GO:0030669|GO:0010008|GO:0060333|GO:0030658	33053587	chr6	33052981	+	hs|6p21.32	NM_002121	chr6:33052981-33053587	NM_002121	Hs.485130
A_32_P209960	-49.3685	-5.62552	49.3685	down	class II, major histocompatibility complex, transactivator	CIITA	FALSE	Homo sapiens class II, major histocompatibility complex, transactivator (CIITA), transcript variant 2, mRNA [NM_000246]	4261	GO:0005515|GO:0044212|GO:0019221|GO:0032403|GO:0045348|GO:0071257|GO:0006955|GO:0006954|GO:0045345|GO:0045944|GO:0034341|GO:0033613|GO:0046677|GO:0060333|GO:0009986|GO:0007568|GO:0003713|GO:0000122|GO:0008022|GO:0005524|GO:0003677|GO:0006351|GO:0071360|GO:0032966|GO:0016605|GO:0005654|GO:0045893|GO:0045892	11018726	chr16	11018667	+	hs|16p13.13	NM_000246	chr16:11018667-11018726	NM_000246	Hs.701991
A_33_P3308872	-45.94	-5.52168	45.94	down	POM121 transmembrane nucleoporin-like 1, pseudogene	POM121L1P	FALSE	Homo sapiens POM121 transmembrane nucleoporin-like 1, pseudogene (POM121L1P), non-coding RNA [NR_024591]	25812		22974270	chr22	22974211	-	hs|22q11.22	NR_024591	chr22:22974270-22974211	NR_024591	Hs.367764
A_32_P187571	-39.2585	-5.29493	39.2585	down	sodium channel, voltage-gated, type II, beta subunit	SCN2B	FALSE	Homo sapiens sodium channel, voltage-gated, type II, beta subunit (SCN2B), mRNA [NM_004588]	6327	GO:0046684|GO:0007268|GO:2000649|GO:0086091|GO:0060048|GO:0007399|GO:0060371|GO:0086002|GO:0001518|GO:0035725|GO:0086012|GO:0086006|GO:0017080	118033630	chr11	118033571	-	hs|11q23.3	NM_004588	chr11:118033630-118033571	NM_004588	Hs.129783
A_32_P108254	-37.781	-5.23959	37.781	down	family with sequence similarity 20, member A	FAM20A	FALSE	Homo sapiens family with sequence similarity 20, member A (FAM20A), transcript variant 1, mRNA [NM_017565]	54757	GO:0070166|GO:0005623|GO:0070062|GO:0055074	66533427	chr17	66533368	-	hs|17q24.2	NM_017565	chr17:66533427-66533368	NM_017565	Hs.268874
A_23_P110253	-33.9921	-5.08713	33.9921	down	v-kit Hardy-Zuckerman 4 feline sarcoma viral oncogene homolog	KIT	FALSE	Homo sapiens v-kit Hardy-Zuckerman 4 feline sarcoma viral oncogene homolog (KIT), transcript variant 1, mRNA [NM_000222]	3815	GO:0005515|GO:0008360|GO:0019221|GO:0007286|GO:0007283|GO:0002020|GO:0005615|GO:0042803|GO:0035234|GO:0043069|GO:0043552|GO:0007173|GO:0042127|GO:0031274|GO:0002327|GO:0045747|GO:0038162|GO:0023014|GO:0002320|GO:0043303|GO:0030335|GO:0006687|GO:0031532|GO:0032762|GO:0014068|GO:0018108|GO:0035855|GO:0019955|GO:0008543|GO:0045087|GO:0008542|GO:0038093|GO:0002371|GO:0009898|GO:0002318|GO:0038095|GO:…	55606570	chr4	55606511	+	hs|4q12	NM_000222	chr4:55606511-55606570	NM_000222	Hs.479754
A_23_P212469	-32.1048	-5.00472	32.1048	down	ectonucleoside triphosphate diphosphohydrolase 3	ENTPD3	FALSE	Homo sapiens ectonucleoside triphosphate diphosphohydrolase 3 (ENTPD3), transcript variant 2, mRNA [NM_001248]	956	GO:0017111|GO:0017110|GO:0005886|GO:0009143|GO:0009134|GO:0016021|GO:0005524	40469954	chr3	40469895	+	hs|3p22.1	NM_001248	chr3:40469895-40469954	NM_001248	Hs.441145
A_24_P88696	-32.0579	-5.00261	32.0579	down	secretogranin II	SCG2	FALSE	Homo sapiens secretogranin II (SCG2), mRNA [NM_003469]	7857	GO:2001237|GO:0009306|GO:0006928|GO:0001525|GO:0005125|GO:0005615|GO:0042056|GO:0050918|GO:0050930|GO:0035556|GO:0006954|GO:0001938|GO:0000165|GO:0001937|GO:0043542|GO:0048245|GO:2000352|GO:0030141	224462528	chr2	224462469	-	hs|2q36.1	NM_003469	chr2:224462528-224462469	NM_003469	Hs.516726
A_23_P66481	-31.076	-4.95773	31.076	down	reticulon 4 receptor-like 1	RTN4RL1	FALSE	Homo sapiens reticulon 4 receptor-like 1 (RTN4RL1), mRNA [NM_178568]	146760	GO:0031103|GO:0009986|GO:0045121|GO:0004872|GO:0046658|GO:0009897	1838527	chr17	1838468	-	hs|17p13.3	NM_178568	chr17:1838527-1838468	NM_178568	Hs.22917
A_24_P352952	-28.77	-4.84649	28.77	down	family with sequence similarity 20, member A	FAM20A	FALSE	Homo sapiens family with sequence similarity 20, member A (FAM20A), transcript variant 1, mRNA [NM_017565]	54757	GO:0070166|GO:0005623|GO:0070062|GO:0055074	66537099	chr17	66537040	-	hs|17q24.2	NM_017565	chr17:66537099-66537040	NM_017565	Hs.268874
A_23_P217379	-28.4048	-4.82806	28.4048	down	collagen, type IV, alpha 6	COL4A6	FALSE	Homo sapiens collagen, type IV, alpha 6 (COL4A6), transcript variant B, mRNA [NM_033641]	1288	GO:0071230|GO:0022617|GO:0030198|GO:0030574|GO:0005587|GO:0005788|GO:0005576|GO:0007155|GO:0005201	107399109	chrX	107399050	-	hs|Xq22.3	NM_033641	chrX:107399109-107399050	NM_033641	Hs.145586
A_23_P413641	-26.1462	-4.70853	26.1462	down	phosphatidylinositol-3,4,5-trisphosphate-dependent Rac exchange factor 1	PREX1	FALSE	Homo sapiens phosphatidylinositol-3,4,5-trisphosphate-dependent Rac exchange factor 1 (PREX1), mRNA [NM_020820]	57580	GO:0005515|GO:0048471|GO:0005886|GO:0006801|GO:0005100|GO:0043231|GO:0005829|GO:0030426|GO:0035556|GO:0005737|GO:0005543|GO:0030833|GO:0043198|GO:0032321|GO:0050773|GO:0030041|GO:0042119|GO:0005089|GO:0019899|GO:0032319	47241677	chr20	47241619	-	hs|20q13.13	NM_020820	chr20:47241677-47241619	NM_020820	Hs.153310
A_23_P56559	-26.0859	-4.7052	26.0859	down	dehydrogenase/reductase (SDR family) member 9	DHRS9	FALSE	Homo sapiens dehydrogenase/reductase (SDR family) member 9 (DHRS9), transcript variant 3, mRNA [NM_001142270]	10170	GO:0004022|GO:0008209|GO:0042904|GO:0042572|GO:0042448|GO:0030855|GO:0047035|GO:0030176|GO:0016854|GO:0004745|GO:0055114	169952434	chr2	169952375	+	hs|2q31.1	NM_001142270	chr2:169952375-169952434	NM_001142270	Hs.179608
A_33_P3269636	-25.9578	-4.6981	25.9578	down	suprabasin	SBSN	FALSE	Homo sapiens suprabasin (SBSN), transcript variant 1, mRNA [NM_001166034]	374897	GO:0005737|GO:0070062	36014331	chr19	36014272	-	hs|19q13.12	NM_001166034	chr19:36014331-36014272	NM_001166034	Hs.433484
A_23_P63209	-25.3926	-4.66634	25.3926	down	hydroxysteroid (11-beta) dehydrogenase 1	HSD11B1	FALSE	Homo sapiens hydroxysteroid (11-beta) dehydrogenase 1 (HSD11B1), transcript variant 2, mRNA [NM_181755]	3290	GO:0070524|GO:0030324|GO:0006704|GO:0005789|GO:0003845|GO:0044281|GO:0016021|GO:0008202|GO:0055114	209907960	chr1	209907901	+	hs|1q32.2	NM_181755	chr1:209907901-209907960	NM_181755	Hs.195040
A_32_P351968	-24.3334	-4.60487	24.3334	down	major histocompatibility complex, class II, DM beta	HLA-DMB	FALSE	Homo sapiens major histocompatibility complex, class II, DM beta (HLA-DMB), mRNA [NM_002118]	3109	GO:0019886|GO:0006955|GO:0002399|GO:0042102|GO:0031902|GO:0002503|GO:0023026|GO:0042613|GO:2001190|GO:0016021|GO:0005765	32902563	chr6	32902504	-	hs|6p21.32	NM_002118	chr6:32902563-32902504	NM_002118	Hs.351279
A_33_P3297092	-22.9879	-4.5228	22.9879	down	H2B histone family, member W, testis-specific	H2BFWT	FALSE	Homo sapiens H2B histone family, member W, testis-specific (H2BFWT), mRNA [NM_001002916]	158983	GO:0031965|GO:0046982|GO:0006334|GO:0000786|GO:0003677	103265788	chrX	103265729	-	hs|Xq22.2	NM_001002916	chrX:103265788-103265729	NM_001002916	Hs.127778
A_33_P3275702	-20.645	-4.36772	20.645	down	flavin containing monooxygenase 2 (non-functional)	FMO2	FALSE	Homo sapiens flavin containing monooxygenase 2 (non-functional) (FMO2), mRNA [NM_001460]	2327	GO:0050661|GO:0006805|GO:0072592|GO:0017144|GO:0050660|GO:0006739|GO:0006082|GO:0044281|GO:0070995|GO:0004497|GO:0004499|GO:0016020|GO:0005789|GO:0009404|GO:0016021	171179928	chr1	171179869	+	hs|1q24.3	NM_001460	chr1:171179869-171179928	NM_001460	Hs.144912
A_19_P00808586	-20.2552	-4.34022	20.2552	down	long intergenic non-protein coding RNA 1085	LINC01085	FALSE	Homo sapiens long intergenic non-protein coding RNA 1085 (LINC01085), long non-coding RNA [NR_033931]	152742		14141580	chr4	14141521	+	hs|4p15.33		chr4:14141521-14141580	NR_033931	Hs.135435
A_23_P434398	-20.0278	-4.32393	20.0278	down	taxilin beta	TXLNB	FALSE	Homo sapiens taxilin beta (TXLNB), mRNA [NM_153235]	167838	GO:0019905|GO:0005515|GO:0005737	139561529	chr6	139561470	-	hs|6q24.1	NM_153235	chr6:139561529-139561470	NM_153235	Hs.535820
A_23_P42868	-19.9811	-4.32056	19.9811	down	insulin-like growth factor binding protein 1	IGFBP1	FALSE	Homo sapiens insulin-like growth factor binding protein 1 (IGFBP1), mRNA [NM_000596]	3484	GO:0008286|GO:0007165|GO:0030307|GO:0005576|GO:0042246|GO:0006987|GO:0044267|GO:0005615|GO:0030968|GO:0005520	45933025	chr7	45932966	+	hs|7p12.3	NM_000596	chr7:45932966-45933025	NM_000596	Hs.642938
A_23_P136683	-19.7503	-4.3038	19.7503	down	major histocompatibility complex, class II, DQ beta 1	HLA-DQB1	FALSE	Homo sapiens major histocompatibility complex, class II, DQ beta 1 (HLA-DQB1), transcript variant 2, mRNA [NM_001243961]	3119	GO:0050852|GO:0012507|GO:0005886|GO:0031295|GO:0019221|GO:0042613|GO:0005765|GO:0032588|GO:0030666|GO:0019886|GO:0006955|GO:0000139|GO:0016020|GO:0002381|GO:0042605|GO:0071556|GO:0032395|GO:0030669|GO:0010008|GO:0060333|GO:0002455|GO:0030658	32628010	chr6	32627951	-	hs|6p21.32	NM_001243961	chr6:32628010-32627951	NM_001243961	Hs.409934
A_23_P103601	-19.1565	-4.25976	19.1565	down	mannosidase, alpha, class 1C, member 1	MAN1C1	FALSE	Homo sapiens mannosidase, alpha, class 1C, member 1 (MAN1C1), transcript variant 1, mRNA [NM_020379]	57134	GO:0030173|GO:0000139|GO:0005509|GO:0004571|GO:0006487|GO:0044267|GO:0043687|GO:0018279	26110894	chr1	26110835	+	hs|1p36.11	NM_020379	chr1:26110835-26110894	NM_020379	Hs.197043
A_32_P148538	-19.071	-4.25331	19.071	down	lipid phosphate phosphatase-related protein type 4	LPPR4	FALSE	Homo sapiens lipid phosphate phosphatase-related protein type 4 (LPPR4), transcript variant 1, mRNA [NM_014839]	9890	GO:0048839|GO:0042577|GO:0046839|GO:0005887|GO:0008195|GO:0007409	99774749	chr1	99774690	+	hs|1p21.2	NM_014839	chr1:99774690-99774749	NM_014839	Hs.13245
A_23_P425681	-19.0609	-4.25254	19.0609	down	cholecystokinin	CCK	FALSE	Homo sapiens cholecystokinin (CCK), transcript variant 1, mRNA [NM_000729]	885	GO:0005515|GO:0030424|GO:0008284|GO:0032099|GO:0050731|GO:0001836|GO:0007409|GO:0005615|GO:0007205|GO:0030425|GO:0043194|GO:0051901|GO:0043195|GO:0043203|GO:0043204|GO:0001662|GO:0005184|GO:0032461|GO:0043065|GO:0006919|GO:0005576|GO:0007165|GO:0005179|GO:0042755|GO:0001764|GO:0051930	42299376	chr3	42299318	-	hs|3p22.1	NM_000729	chr3:42299376-42299318	NM_000729	Hs.458426
A_33_P3271635	-18.6334	-4.21982	18.6334	down	major histocompatibility complex, class II, DP beta 1	HLA-DPB1	FALSE	Homo sapiens major histocompatibility complex, class II, DP beta 1 (HLA-DPB1), mRNA [NM_002121]	3115	GO:0032729|GO:0050852|GO:0012507|GO:0005886|GO:0009986|GO:0019221|GO:0031295|GO:0042613|GO:0005765|GO:0032588|GO:0030666|GO:0019886|GO:0000139|GO:0050870|GO:0042605|GO:0042102|GO:0071556|GO:0030669|GO:0010008|GO:0060333|GO:0030658	33048537	chr6	33048489	+	hs|6p21.32	NM_002121	chr6:33048489-33048537	NM_002121	Hs.485130
A_24_P6370	-17.2188	-4.10592	17.2188	down	chromosome 1 open reading frame 110	C1orf110	FALSE	Homo sapiens chromosome 1 open reading frame 110 (C1orf110), mRNA [NM_178550]	339512		162824211	chr1	162824152	-	hs|1q23.3	NM_178550	chr1:162824211-162824152	NM_178550	Hs.407631
A_23_P78092	-16.3505	-4.03126	16.3505	down	ecotropic viral integration site 2A	EVI2A	FALSE	Homo sapiens ecotropic viral integration site 2A (EVI2A), transcript variant 1, mRNA [NM_001003927]	2123	GO:0007165|GO:0016021|GO:0004888	29645461	chr17	29645402	-	hs|17q11.2	NM_001003927	chr17:29645461-29645402	NM_001003927	Hs.591198
A_23_P58328	-15.8158	-3.9833	15.8158	down	annexin A10	ANXA10	FALSE	Homo sapiens annexin A10 (ANXA10), mRNA [NM_007193]	11199	GO:0005739|GO:0005544|GO:0005509	169108623	chr4	169108564	+	hs|4q32.3	NM_007193	chr4:169108564-169108623	NM_007193	Hs.188401
A_23_P110624	-15.6352	-3.96673	15.6352	down	catenin (cadherin-associated protein), delta 2	CTNND2	FALSE	Homo sapiens catenin (cadherin-associated protein), delta 2 (CTNND2), transcript variant 1, mRNA [NM_001332]	1501	GO:0005515|GO:0043005|GO:0006355|GO:0014069|GO:0005634|GO:0007275|GO:0006351|GO:0007165|GO:0005737|GO:0016337|GO:0005912|GO:0048167|GO:0043204|GO:0007612|GO:0007155|GO:0001763	10973143	chr5	10973084	-	hs|5p15.2	NM_001332	chr5:10973143-10973084	NM_001332	Hs.314543
A_23_P91636	-15.6243	-3.96572	15.6243	down	POM121 transmembrane nucleoporin-like 9, pseudogene	POM121L9P	FALSE	Homo sapiens POM121 transmembrane nucleoporin-like 9, pseudogene (POM121L9P), non-coding RNA [NR_003714]	29774		24661154	chr22	24661095	+	hs|22q11.23	NR_003714	chr22:24661095-24661154	NR_003714	Hs.534980
A_23_P56578	-15.5287	-3.95686	15.5287	down	vitrin	VIT	FALSE	Homo sapiens vitrin (VIT), transcript variant 1, mRNA [NM_053276]	5212	GO:0030198|GO:0010811|GO:0005539|GO:0005614	37041825	chr2	37041766	+	hs|2p22.2	NM_053276	chr2:37041766-37041825	NM_053276	Hs.137415
A_24_P129341	-15.3329	-3.93856	15.3329	down	aldo-keto reductase family 1, member B10 (aldose reductase)	AKR1B10	FALSE	Homo sapiens aldo-keto reductase family 1, member B10 (aldose reductase) (AKR1B10), mRNA [NM_020299]	57016	GO:0005515|GO:0044598|GO:0047718|GO:0045550|GO:0044597|GO:0001758|GO:0007603|GO:0007586|GO:0006081|GO:0001523|GO:0005764|GO:0005829|GO:0004033|GO:0016488|GO:0008202|GO:0070062|GO:0055114	134225858	chr7	134225799	+	hs|7q33	NM_020299	chr7:134225799-134225858	NM_020299	Hs.116724
A_33_P3256810	-14.7231	-3.88001	14.7231	down	transmembrane 4 L six family member 4	TM4SF4	FALSE	Homo sapiens transmembrane 4 L six family member 4 (TM4SF4), mRNA [NM_004617]	7104	GO:0016021|GO:0042246	149216647	chr3	149216588	+	hs|3q25.1	NM_004617	chr3:149216588-149216647	NM_004617	Hs.133527
A_23_P66694	-14.4593	-3.85392	14.4593	down	ecotropic viral integration site 2B	EVI2B	FALSE	Homo sapiens ecotropic viral integration site 2B (EVI2B), mRNA [NM_006495]	2124	GO:0005887	29631839	chr17	29631780	-	hs|17q11.2	NM_006495	chr17:29631839-29631780	NM_006495	Hs.5509
A_33_P3400273	-14.2838	-3.83631	14.2838	down	selectin L	SELL	FALSE	Homo sapiens selectin L (SELL), transcript variant 1, mRNA [NM_000655]	6402	GO:0005515|GO:0005886|GO:0050900|GO:0002020|GO:0005887|GO:0007596|GO:0043208|GO:0050776|GO:0030246|GO:0033198|GO:0007155|GO:0008201|GO:0050839|GO:0009897	169659870	chr1	169659811	-	hs|1q24.2	NM_000655	chr1:169659870-169659811	NM_000655	Hs.728756
A_23_P112026	-14.0429	-3.81177	14.0429	down	indoleamine 2,3-dioxygenase 1	IDO1	FALSE	Homo sapiens indoleamine 2,3-dioxygenase 1 (IDO1), mRNA [NM_002164]	3620	GO:0006569|GO:0070233|GO:0032693|GO:0046007|GO:0002534|GO:0032735|GO:0044281|GO:0046872|GO:0030485|GO:0005829|GO:0034641|GO:0002678|GO:0032496|GO:0007565|GO:0004833|GO:0043065|GO:0009055|GO:0032421|GO:0033555|GO:0002666|GO:0019441|GO:0033754|GO:0002830|GO:0034276|GO:0020037|GO:0055114	39785588	chr8	39785529	+	hs|8p11.21	NM_002164	chr8:39785529-39785588	NM_002164	Hs.840
A_33_P3234277	-13.7213	-3.77835	13.7213	down	major histocompatibility complex, class II, DP alpha 1	HLA-DPA1	FALSE	Homo sapiens major histocompatibility complex, class II, DP alpha 1 (HLA-DPA1), transcript variant 2, mRNA [NM_001242524]	3113	GO:0050852|GO:0005886|GO:0019221|GO:0031295|GO:0005765|GO:0019886|GO:0006955|GO:0042102|GO:0042605|GO:0071556|GO:0030658|GO:0060333|GO:0032729|GO:0012507|GO:0009986|GO:0042613|GO:0032588|GO:0030666|GO:0000139|GO:0071346|GO:0005887|GO:0050870|GO:0030669|GO:0032395|GO:0010008	33036945	chr6	33036886	-	hs|6p21.32	NM_001242524	chr6:33036945-33036886	NM_001242524	Hs.347270
A_23_P84860	-13.6641	-3.77232	13.6641	down	family with sequence similarity 107, member A	FAM107A	FALSE	Homo sapiens family with sequence similarity 107, member A (FAM107A), transcript variant 1, mRNA [NM_007177]	11170	GO:0003674|GO:0005634|GO:0001558	58550152	chr3	58550093	-	hs|3p14.3	NM_007177	chr3:58550152-58550093	NM_007177	Hs.506357
A_23_P7313	-13.5444	-3.75963	13.5444	down	secreted phosphoprotein 1	SPP1	FALSE	Homo sapiens secreted phosphoprotein 1 (SPP1), transcript variant 1, mRNA [NM_001040058]	6696	GO:0005515|GO:0048471|GO:0007566|GO:0010811|GO:0030593|GO:0050840|GO:0045177|GO:0033280|GO:0005576|GO:0042995|GO:0048545|GO:0005125|GO:0005615|GO:0031214|GO:0001649|GO:0048685|GO:0046697|GO:0006954|GO:0022617|GO:0045780|GO:0030198|GO:0007155|GO:0070062	88903979	chr4	88903920	+	hs|4q22.1	NM_001040058	chr4:88903920-88903979	NM_001040058	Hs.313
A_23_P1962	-13.4634	-3.75097	13.4634	down	retinoic acid receptor responder (tazarotene induced) 3	RARRES3	FALSE	Homo sapiens retinoic acid receptor responder (tazarotene induced) 3 (RARRES3), mRNA [NM_004585]	5920	GO:0016042|GO:0008285|GO:0004623|GO:0016021|GO:0006644	63313886	chr11	63313827	+	hs|11q12.3	NM_004585	chr11:63313827-63313886	NM_004585	Hs.17466
A_33_P3368193	-13.4406	-3.74852	13.4406	down	pancreatic lipase-related protein 3	PNLIPRP3	FALSE	Homo sapiens pancreatic lipase-related protein 3 (PNLIPRP3), mRNA [NM_001011709]	119548	GO:0016042|GO:0004806|GO:0005576	118237459	chr10	118237400	+	hs|10q25.3	NM_001011709	chr10:118237400-118237459	NM_001011709	Hs.276724
A_23_P329261	-13.2995	-3.7333	13.2995	down	potassium inwardly-rectifying channel, subfamily J, member 2	KCNJ2	FALSE	Homo sapiens potassium inwardly-rectifying channel, subfamily J, member 2 (KCNJ2), mRNA [NM_000891]	3759	GO:0014861|GO:0005886|GO:0060306|GO:0007268|GO:0031224|GO:0086091|GO:0042802|GO:0086008|GO:0014704|GO:0043197|GO:0051289|GO:0008076|GO:0086002|GO:0043025|GO:0006813|GO:0071805|GO:0005791|GO:0005242|GO:0015693|GO:0005794|GO:0030007|GO:0090076|GO:0010107|GO:0005546|GO:0030315|GO:0060075|GO:0005790|GO:0005887|GO:0086013|GO:0086011|GO:0055119|GO:0086012|GO:0071260	68176075	chr17	68176016	+	hs|17q24.3	NM_000891	chr17:68176016-68176075	NM_000891	Hs.1547
A_23_P155755	-13.2064	-3.72316	13.2064	down	chemokine (C-X-C motif) ligand 6	CXCL6	FALSE	Homo sapiens chemokine (C-X-C motif) ligand 6 (CXCL6), mRNA [NM_002993]	6372	GO:0008009|GO:0007165|GO:0006955|GO:0006954|GO:0006935|GO:0060326|GO:0007267|GO:0005576|GO:0008201|GO:0005615|GO:0042742	74703427	chr4	74703368	+	hs|4q13.3	NM_002993	chr4:74703368-74703427	NM_002993	Hs.164021
A_23_P30913	-13.1583	-3.7179	13.1583	down	major histocompatibility complex, class II, DP alpha 1	HLA-DPA1	FALSE	Homo sapiens major histocompatibility complex, class II, DP alpha 1 (HLA-DPA1), transcript variant 1, mRNA [NM_033554]	3113	GO:0050852|GO:0005886|GO:0019221|GO:0031295|GO:0005765|GO:0019886|GO:0006955|GO:0042102|GO:0042605|GO:0071556|GO:0030658|GO:0060333|GO:0032729|GO:0012507|GO:0009986|GO:0042613|GO:0032588|GO:0030666|GO:0000139|GO:0071346|GO:0005887|GO:0050870|GO:0030669|GO:0032395|GO:0010008	33032907	chr6	33032848	-	hs|6p21.32	NM_033554	chr6:33032907-33032848	NM_033554	Hs.347270
A_19_P00802607	-12.974	-3.69756	12.974	down		XLOC_001537	FALSE	BROAD Institute lincRNA (XLOC_001537), lincRNA [TCONS_00003738]			75169863	chr2	75169804	+	hs|2p12		chr2:75169804-75169863
A_23_P201808	-12.5754	-3.65253	12.5754	down	phosphatidic acid phosphatase type 2B	PPAP2B	FALSE	Homo sapiens phosphatidic acid phosphatase type 2B (PPAP2B), mRNA [NM_003713]	8613	GO:0006629|GO:0005515|GO:0005886|GO:0030111|GO:0050731|GO:0044281|GO:0051091|GO:0042577|GO:0005912|GO:0004721|GO:0070062|GO:0006665|GO:0008354|GO:0005794|GO:0001568|GO:0044329|GO:0030148|GO:0050821|GO:0008195|GO:0044328|GO:0001702|GO:0034109|GO:0005178|GO:0016020|GO:0044330|GO:0016311|GO:0001933|GO:0016021|GO:0006644	56960899	chr1	56960840	-	hs|1p32.2	NM_003713	chr1:56960899-56960840	NM_003713	Hs.405156
A_33_P3454679	-12.4456	-3.63756	12.4456	down			FALSE	PREDICTED: Homo sapiens glutenin, high molecular weight subunit DX5-like (LOC100996433), mRNA [XM_006710179]								XM_006710179		XM_006710179	Hs.701992
A_33_P3300267	-12.2437	-3.61396	12.2437	down	vitrin	VIT	FALSE	Homo sapiens vitrin (VIT), transcript variant 1, mRNA [NM_053276]	5212	GO:0030198|GO:0010811|GO:0005539|GO:0005614	37041576	chr2	37041517	+	hs|2p22.2	NM_053276	chr2:37041517-37041576	NM_053276	Hs.137415
A_23_P148737	-12.2395	-3.61347	12.2395	down	myosin binding protein H	MYBPH	FALSE	Homo sapiens myosin binding protein H (MYBPH), mRNA [NM_004997]	4608	GO:0005515|GO:0032982|GO:0006942|GO:0008307|GO:0007155	203137019	chr1	203136960	-	hs|1q32.1	NM_004997	chr1:203137019-203136960	NM_004997	Hs.927
A_19_P00805655	-12.0911	-3.59587	12.0911	down			FALSE				105847095	chr12	105847036	+	hs|12q23.3		chr12:105847036-105847095
A_23_P144476	-12.086	-3.59527	12.086	down	sprouty homolog 1, antagonist of FGF signaling (Drosophila)	SPRY1	FALSE	Homo sapiens sprouty homolog 1, antagonist of FGF signaling (Drosophila) (SPRY1), transcript variant 2, mRNA [NM_199327]	10252	GO:0001656|GO:0005515|GO:0001657|GO:0008285|GO:0005886|GO:0042059|GO:0001759|GO:0051387|GO:0005829|GO:0046580|GO:0007173|GO:0043407|GO:0040037|GO:0070373|GO:0034261	124324553	chr4	124324494	+	hs|4q28.1	NM_199327	chr4:124324494-124324553	NM_199327	Hs.744854
A_23_P10873	-12.0634	-3.59257	12.0634	down	toll-like receptor 1	TLR1	FALSE	Homo sapiens toll-like receptor 1 (TLR1), mRNA [NM_003263]	7096	GO:0045410|GO:0034130|GO:0046982|GO:0005886|GO:0042535|GO:0007165|GO:0006955|GO:0006954|GO:0016020|GO:0042116|GO:0005887|GO:0045087|GO:0042495|GO:0002755|GO:0035354|GO:0030670|GO:0050707|GO:0004872|GO:0071727|GO:0004888	38798072	chr4	38798013	-	hs|4p14	NM_003263	chr4:38798072-38798013	NM_003263	Hs.654532
A_19_P00318236	-12.0492	-3.59087	12.0492	down			FALSE				54292780	chr2	54292721	-	hs|2p16.2		chr2:054292780-054292721
A_23_P397248	-12.0209	-3.58748	12.0209	down	chloride channel accessory 2	CLCA2	FALSE	Homo sapiens chloride channel accessory 2 (CLCA2), mRNA [NM_006536]	9635	GO:0030054|GO:0009925|GO:0005887|GO:0006810|GO:0005576|GO:0007155|GO:0005254|GO:0015276	86921650	chr1	86921591	+	hs|1p22.3	NM_006536	chr1:86921591-86921650	NM_006536	Hs.241551
A_23_P23639	-11.7854	-3.55893	11.7854	down	mucolipin 2	MCOLN2	FALSE	Homo sapiens mucolipin 2 (MCOLN2), mRNA [NM_153259]	255231	GO:0034220|GO:0005886|GO:0070588|GO:0016021|GO:0055085	85392254	chr1	85392195	-	hs|1p22.3	NM_153259	chr1:85392254-85392195	NM_153259	Hs.591446
A_23_P44466	-11.7519	-3.55483	11.7519	down	coiled-coil domain containing 102B	CCDC102B	FALSE	Homo sapiens coiled-coil domain containing 102B (CCDC102B), transcript variant 2, mRNA [NM_024781]	79839		66722132	chr18	66722073	+	hs|18q22.1	NM_024781	chr18:66722073-66722132	NM_024781	Hs.280781
A_33_P3308749	-11.7047	-3.54902	11.7047	down	laminin, alpha 4	LAMA4	FALSE	Homo sapiens laminin, alpha 4 (LAMA4), transcript variant 3, mRNA [NM_001105207]	3910	GO:0030334|GO:0001568|GO:0005102|GO:0005605|GO:0005606|GO:0005576|GO:0030155|GO:0005604|GO:0031012|GO:0045995|GO:0050873|GO:0030198|GO:0007155|GO:0070062|GO:0005201	112537629	chr6	112537570	-	hs|6q21	NM_001105207	chr6:112537629-112537570	NM_001105207	Hs.654572
A_23_P314101	-11.6112	-3.53744	11.6112	down	sushi domain containing 2	SUSD2	FALSE	Homo sapiens sushi domain containing 2 (SUSD2), mRNA [NM_019601]	56241	GO:0006955|GO:0030247|GO:0016021|GO:0006898|GO:0070062|GO:0005044	24585037	chr22	24584978	+	hs|22q11.23	NM_019601	chr22:24584978-24585037	NM_019601	Hs.131819
A_23_P216556	-11.5794	-3.53349	11.5794	down	erythrocyte membrane protein band 4.1 like 4B	EPB41L4B	FALSE	Homo sapiens erythrocyte membrane protein band 4.1 like 4B (EPB41L4B), transcript variant 1, mRNA [NM_018424]	54566	GO:0008092|GO:0005737|GO:0005200|GO:0045177|GO:0031032|GO:0005856|GO:0019898	112002981	chr9	112002922	-	hs|9q31.3	NM_018424	chr9:112002981-112002922	NM_018424	Hs.591901
A_32_P35947	-11.4156	-3.51293	11.4156	down			FALSE				241932632	chr2	241932573	+	hs|2q37.3		chr2:241932573-241932632
A_19_P00322339	-11.1864	-3.48368	11.1864	down	long intergenic non-protein coding RNA 707	LINC00707	FALSE	Homo sapiens long intergenic non-protein coding RNA 707 (LINC00707), long non-coding RNA [NR_038291]	100507127		6884488	chr10	6884429	+	hs|10p14		chr10:6884429-6884488	NR_038291	Hs.498571
A_23_P93641	-11.0656	-3.468	11.0656	down	aldo-keto reductase family 1, member B10 (aldose reductase)	AKR1B10	FALSE	Homo sapiens aldo-keto reductase family 1, member B10 (aldose reductase) (AKR1B10), mRNA [NM_020299]	57016	GO:0005515|GO:0044598|GO:0047718|GO:0045550|GO:0044597|GO:0001758|GO:0007603|GO:0007586|GO:0006081|GO:0001523|GO:0005764|GO:0005829|GO:0004033|GO:0016488|GO:0008202|GO:0070062|GO:0055114	134225998	chr7	134225939	+	hs|7q33	NM_020299	chr7:134225939-134225998	NM_020299	Hs.116724
A_33_P3236568	-10.958	-3.45391	10.958	down	late cornified envelope 2D	LCE2D	FALSE	Homo sapiens late cornified envelope 2D (LCE2D), mRNA [NM_178430]	353141	GO:0031424	152636972	chr1	152636913	+	hs|1q21.3	NM_178430	chr1:152636913-152636972	NM_178430	Hs.490225
A_33_P3263533	-10.8927	-3.44529	10.8927	down	sodium channel, voltage-gated, type I, alpha subunit	SCN1A	FALSE	Homo sapiens sodium channel, voltage-gated, type I, alpha subunit (SCN1A), transcript variant 4, mRNA [NM_001202435]	6323	GO:0030018|GO:0086010|GO:0005886|GO:0005248|GO:0030315|GO:0019227|GO:0019228|GO:0043194|GO:0033268|GO:0014704|GO:0050884|GO:0043025|GO:0007628|GO:0001518|GO:0034765|GO:0035725|GO:0006814	166845771	chr2	166845712	-	hs|2q24.3	NM_001202435	chr2:166845771-166845712	NM_001202435	Hs.22654
A_23_P121064	-10.8897	-3.44489	10.8897	down	pentraxin 3, long	PTX3	FALSE	Homo sapiens pentraxin 3, long (PTX3), mRNA [NM_002852]	5806	GO:0050766|GO:0006954|GO:0046597|GO:0045087|GO:0001849|GO:0046790|GO:0005576|GO:0001872|GO:0005615|GO:0001878|GO:0008228|GO:0045429	157161028	chr3	157160969	+	hs|3q25.32	NM_002852	chr3:157160969-157161028	NM_002852	Hs.591286
A_23_P500400	-10.778	-3.43002	10.778	down	ATP-binding cassette, sub-family A (ABC1), member 6	ABCA6	FALSE	Homo sapiens ATP-binding cassette, sub-family A (ABC1), member 6 (ABCA6), mRNA [NM_080284]	23460	GO:0006200|GO:0006810|GO:0016021|GO:0016887|GO:0005524	67074908	chr17	67074849	-	hs|17q24.2	NM_080284	chr17:67074908-67074849	NM_080284	Hs.709514
A_33_P3380992	-10.6105	-3.40743	10.6105	down	aldo-keto reductase family 1, member B15	AKR1B15	FALSE	Homo sapiens aldo-keto reductase family 1, member B15 (AKR1B15), mRNA [NM_001080538]	441282	GO:0016491|GO:0055114	134262527	chr7	134262468	+	hs|7q33	NM_001080538	chr7:134262468-134262527	NM_001080538	Hs.729418
A_19_P00316836	-10.4843	-3.39016	10.4843	down			FALSE	PREDICTED: Homo sapiens uncharacterized LOC102724515 (LOC102724515), ncRNA [XR_425415]			75159858	chr2	75159799	+	hs|2p12	XR_425415	chr2:75159799-75159858	XR_425415	Hs.708649
A_23_P90626	-10.1499	-3.34339	10.1499	down	cytohesin 1 interacting protein	CYTIP	FALSE	Homo sapiens cytohesin 1 interacting protein (CYTIP), mRNA [NM_004288]	9595	GO:0005515|GO:0005737|GO:0005730|GO:0005634|GO:0030155|GO:0005938|GO:0005769	158272226	chr2	158272167	-	hs|2q24.1	NM_004288	chr2:158272226-158272167	NM_004288	Hs.270
A_23_P216108	-10.0387	-3.32751	10.0387	down	ankyrin 1, erythrocytic	ANK1	FALSE	Homo sapiens ankyrin 1, erythrocytic (ANK1), transcript variant 3, mRNA [NM_000037]	286	GO:0005515|GO:0030018|GO:0005886|GO:0072661|GO:0005634|GO:0006887|GO:0005829|GO:0016323|GO:0007411|GO:0048821|GO:0045211|GO:0007010|GO:0051117|GO:0030673|GO:0005856|GO:0008093|GO:0030507|GO:0014731|GO:0045199|GO:0031430|GO:0015672|GO:0042383|GO:0006888|GO:0010638|GO:0007165|GO:0016529|GO:0006779|GO:0005198|GO:0005200|GO:0030863|GO:0019899	41513128	chr8	41513069	-	hs|8p11.21	NM_000037	chr8:41513128-41513069	NM_000037	Hs.654438
A_23_P415021	-9.9988	-3.32176	9.9988	down	methyltransferase like 7A	METTL7A	FALSE	Homo sapiens methyltransferase like 7A (METTL7A), mRNA [NM_014033]	25840	GO:0005811|GO:0016020|GO:0005783|GO:0008168|GO:0032259|GO:0070062	51326160	chr12	51326101	+	hs|12q13.12	NM_014033	chr12:51326101-51326160	NM_014033	Hs.744021
A_33_P3337549	-9.55764	-3.25665	9.55764	down	ATP-binding cassette, sub-family B (MDR/TAP), member 5	ABCB5	FALSE	Homo sapiens ATP-binding cassette, sub-family B (MDR/TAP), member 5 (ABCB5), transcript variant 3, mRNA [NM_001163942]	340273	GO:0002481|GO:0015562|GO:0006200|GO:0005886|GO:0005887|GO:0042391|GO:0002485|GO:0002489|GO:0042626|GO:0055085|GO:0005524|GO:0002591	20699735	chr7	20699676	+	hs|7p21.1	NM_001163942	chr7:20699676-20699735	NM_001163942	Hs.404102
A_33_P3278659	-9.51291	-3.24989	9.51291	down			FALSE	Homo sapiens mRNA, endogenous retrovirus. [AB128832]			68598273	chr6	68598214	-	hs|6q12	AB128832	chr6:68598273-68598214		Hs.289232
A_23_P161698	-9.48612	-3.24582	9.48612	down	matrix metallopeptidase 3 (stromelysin 1, progelatinase)	MMP3	FALSE	Homo sapiens matrix metallopeptidase 3 (stromelysin 1, progelatinase) (MMP3), mRNA [NM_002422]	4314	GO:0030334|GO:0071230|GO:0022617|GO:0030198|GO:0030574|GO:0005509|GO:0006508|GO:0005578|GO:0008270|GO:0005576|GO:0004222|GO:0005615	102706753	chr11	102706694	-	hs|11q22.2	NM_002422	chr11:102706753-102706694	NM_002422	Hs.375129
A_33_P3347343	-9.39139	-3.23134	9.39139	down	coiled-coil domain containing 102B	CCDC102B	FALSE	Homo sapiens coiled-coil domain containing 102B (CCDC102B), transcript variant 1, mRNA [NM_001093729]	79839		66564657	chr18	66564598	+	hs|18q22.1	NM_001093729	chr18:66564598-66564657	NM_001093729	Hs.280781
A_24_P267686	-9.36153	-3.22674	9.36153	down			FALSE				19005666	chr22	19005607	-	hs|22q11.21		chr22:019005666-019005607
A_24_P343233	-9.26311	-3.2115	9.26311	down	major histocompatibility complex, class II, DR beta 1	HLA-DRB1	FALSE	Homo sapiens major histocompatibility complex, class II, DR beta 1 (HLA-DRB1), transcript variant 1, mRNA [NM_002124]	3123	GO:0002437|GO:0050852|GO:0005886|GO:0019221|GO:0031295|GO:0042088|GO:0005765|GO:0042130|GO:0019886|GO:0006955|GO:0002381|GO:0042605|GO:2001179|GO:0071556|GO:0032689|GO:0070062|GO:0060333|GO:0030658|GO:0012507|GO:0051262|GO:0009986|GO:0002506|GO:0035774|GO:0002503|GO:0042613|GO:0032588|GO:0030666|GO:0000139|GO:0016020|GO:0005887|GO:0031902|GO:0032673|GO:0023026|GO:0016045|GO:0030669|GO:0032395|GO:…	32548583	chr6	32548524	-	hs|6p21.32	NM_002124	chr6:32548583-32548524	NM_002124	Hs.696211
A_23_P397293	-9.22922	-3.20621	9.22922	down	lymphocyte antigen 6 complex, locus K	LY6K	FALSE	Homo sapiens lymphocyte antigen 6 complex, locus K (LY6K), transcript variant 1, mRNA [NM_017527]	54742	GO:0005737|GO:0005886|GO:0005730|GO:0005634|GO:0005576|GO:0031225	143784880	chr8	143784821	+	hs|8q24.3	NM_017527	chr8:143784821-143784880	NM_017527	Hs.69517
A_23_P69310	-9.15134	-3.19398	9.15134	down	chemokine (C-C motif) receptor-like 2	CCRL2	FALSE	Homo sapiens chemokine (C-C motif) receptor-like 2 (CCRL2), transcript variant 1, mRNA [NM_003965]	9034	GO:0070098|GO:0006954|GO:0007186|GO:0006935|GO:0005886|GO:0005887|GO:0048020|GO:0004950|GO:0042379	46450781	chr3	46450722	+	hs|3p21.31	NM_003965	chr3:46450722-46450781	NM_003965	Hs.535713
A_23_P155596	-9.04029	-3.17637	9.04029	down	flavin containing monooxygenase 3	FMO3	FALSE	Homo sapiens flavin containing monooxygenase 3 (FMO3), transcript variant 2, mRNA [NM_001002294]	2328	GO:0050661|GO:0034899|GO:0006805|GO:0004499|GO:0017144|GO:0050660|GO:0005789|GO:0044281|GO:0016021|GO:0016597|GO:0055114|GO:0043231	171086547	chr1	171086488	+	hs|1q24.3	NM_001002294	chr1:171086488-171086547	NM_001002294	Hs.445350
A_23_P142878	-9.01563	-3.17243	9.01563	down	atonal homolog 8 (Drosophila)	ATOH8	FALSE	Homo sapiens atonal homolog 8 (Drosophila) (ATOH8), mRNA [NM_032827]	84913	GO:0006355|GO:0046983|GO:0005634|GO:0003677|GO:0030154|GO:0006351|GO:0007399	86014927	chr2	86014868	+	hs|2p11.2	NM_032827	chr2:86014868-86014927	NM_032827	Hs.135569
A_32_P356316	-8.8025	-3.13791	8.8025	down	major histocompatibility complex, class II, DO alpha	HLA-DOA	FALSE	Homo sapiens major histocompatibility complex, class II, DO alpha (HLA-DOA), mRNA [NM_002119]	3111	GO:0019886|GO:0007165|GO:0006955|GO:0005886|GO:0002587|GO:0045580|GO:0023026|GO:0042613|GO:0016021|GO:0005765|GO:0032395|GO:0010008	32972029	chr6	32971970	-	hs|6p21.32	NM_002119	chr6:32972029-32971970	NM_002119	Hs.631991
A_23_P312874	-8.72956	-3.12591	8.72956	down	spermatogenesis associated, serine-rich 1	SPATS1	FALSE	Homo sapiens spermatogenesis associated, serine-rich 1 (SPATS1), mRNA [NM_145026]	221409		44337808	chr6	44336198	+	hs|6p21.1	NM_145026	chr6:44336198-44337808	NM_145026	Hs.135283
A_23_P24469	-8.69516	-3.12021	8.69516	down	cysteine and glycine-rich protein 3 (cardiac LIM protein)	CSRP3	FALSE	Homo sapiens cysteine and glycine-rich protein 3 (cardiac LIM protein) (CSRP3), mRNA [NM_003476]	8048	GO:0005515|GO:0030018|GO:0033365|GO:0042805|GO:0006874|GO:0031433|GO:0005634|GO:0035995|GO:0060048|GO:0048738|GO:0003300|GO:0002026|GO:0007519|GO:0055003|GO:0008270|GO:0005856|GO:0008307	19204109	chr11	19204050	-	hs|11p15.1	NM_003476	chr11:19204109-19204050	NM_003476	Hs.83577
A_24_P63347	-8.69147	-3.1196	8.69147	down	platelet factor 4 variant 1	PF4V1	FALSE	Homo sapiens platelet factor 4 variant 1 (PF4V1), mRNA [NM_002620]	5197	GO:0008009|GO:0006955|GO:0060326|GO:0008201|GO:0005615	74720196	chr4	74720137	+	hs|4q13.3	NM_002620	chr4:74720137-74720196	NM_002620	Hs.72933
A_23_P252541	-8.68067	-3.11781	8.68067	down	RAB7B, member RAS oncogene family	RAB7B	FALSE	Homo sapiens RAB7B, member RAS oncogene family (RAB7B), transcript variant 1, mRNA [NM_177403]	338382	GO:0005802|GO:0032755|GO:0034144|GO:0005794|GO:0005770|GO:0007264|GO:0005525|GO:0015031|GO:0005764|GO:0045335|GO:0045654|GO:0051092|GO:0034499|GO:0030670|GO:0034164						NM_177403		NM_177403	Hs.534612
A_33_P3368646	-8.47411	-3.08306	8.47411	down	CNKSR family member 3	CNKSR3	FALSE	Homo sapiens CNKSR family member 3 (CNKSR3), mRNA [NM_173515]	154043	GO:0005737|GO:0016020|GO:0033137|GO:0010765|GO:0070373	154743768	chr6	154743709	-	hs|6q25.2	NM_173515	chr6:154743768-154743709	NM_173515	Hs.16064
A_33_P3355004	-8.42598	-3.07484	8.42598	down	dopa decarboxylase (aromatic L-amino acid decarboxylase)	DDC	FALSE	Homo sapiens dopa decarboxylase (aromatic L-amino acid decarboxylase) (DDC), transcript variant 7, mRNA [NM_001242890]	1644	GO:0005515|GO:0030424|GO:0046684|GO:0010259|GO:0044281|GO:0005829|GO:0042416|GO:0034641|GO:0043025|GO:0070062|GO:0033076|GO:0006520|GO:0019904|GO:0071312|GO:0035690|GO:0008021|GO:0042427|GO:0071363|GO:0046219|GO:0052314|GO:0030170|GO:0004058|GO:0007623|GO:0016597|GO:0015842|GO:0042423	50560690	chr7	50560631	-	hs|7p12.1	NM_001242890	chr7:50560690-50560631	NM_001242890	Hs.359698
A_23_P205370	-8.30909	-3.05469	8.30909	down	ankyrin repeat and SOCS box containing 2	ASB2	FALSE	Homo sapiens ankyrin repeat and SOCS box containing 2 (ASB2), transcript variant 2, mRNA [NM_016150]	51676	GO:0035556|GO:0005515|GO:0000209|GO:0007165|GO:0004842|GO:0042787|GO:0045445|GO:0035914|GO:0031466	94400660	chr14	94400601	-	hs|14q32.12	NM_016150	chr14:94400660-94400601	NM_016150	Hs.510327
A_33_P3366540	-8.21875	-3.03892	8.21875	down	chondroitin sulfate N-acetylgalactosaminyltransferase 1	CSGALNACT1	FALSE	Homo sapiens chondroitin sulfate N-acetylgalactosaminyltransferase 1 (CSGALNACT1), transcript variant 1, mRNA [NM_001130518]	55790	GO:0008037|GO:0051216|GO:0008283|GO:0044281|GO:0015014|GO:0009653|GO:0046872|GO:0005622|GO:0030206|GO:0030198|GO:0032580|GO:0030204|GO:0047238|GO:0030203|GO:0047237|GO:0050653|GO:0008955|GO:0050650|GO:0050651|GO:0005975|GO:0019276|GO:0015020|GO:0008376|GO:0007399|GO:0030166|GO:0001958|GO:0030173|GO:0000139|GO:0046398|GO:0030210	19315997	chr8	19315938	-	hs|8p21.3	NM_001130518	chr8:19315997-19315938	NM_001130518	Hs.613729
A_23_P333498	-8.14654	-3.02619	8.14654	down	endonuclease/exonuclease/phosphatase family domain containing 1	EEPD1	FALSE	Homo sapiens endonuclease/exonuclease/phosphatase family domain containing 1 (EEPD1), mRNA [NM_030636]	80820	GO:0006281|GO:0003677	36340917	chr7	36340858	+	hs|7p14.2	NM_030636	chr7:36340858-36340917	NM_030636	Hs.487994
A_33_P3248629	-8.12668	-3.02267	8.12668	down	DENN/MADD domain containing 2A	DENND2A	FALSE	DENN/MADD domain containing 2A [Source:HGNC Symbol;Acc:22212] [ENST00000492720]	27147	GO:0017112|GO:0032313|GO:0005737|GO:0042147|GO:0015629|GO:0015031	140244416	chr7	140244357	-	hs|7q34	BC115004	chr7:140244416-140244357		Hs.6385
A_33_P3309471	-8.09579	-3.01717	8.09579	down	protein tyrosine phosphatase, receptor type, Q	PTPRQ	FALSE	Homo sapiens protein tyrosine phosphatase, receptor type, Q (PTPRQ), mRNA [NM_001145026]	374462	GO:0042472|GO:0045598|GO:0016021|GO:0035335|GO:0004725	81073798	chr12	81073739	+	hs|12q21.31	NM_001145026	chr12:81073739-81073798	NM_001145026	Hs.539284
A_23_P13753	-8.0742	-3.01332	8.0742	down	nuclear factor, erythroid 2	NFE2	FALSE	Homo sapiens nuclear factor, erythroid 2 (NFE2), transcript variant 1, mRNA [NM_006163]	4778	GO:0003700|GO:0006357|GO:0050699|GO:0008015|GO:0003713|GO:0005730|GO:0007267|GO:0005634|GO:0007275|GO:0006337|GO:0030502|GO:0015629|GO:0006351|GO:2000758|GO:0043565|GO:0007599|GO:0005737|GO:0047485|GO:0007596|GO:0016605|GO:0060716|GO:0005654|GO:0045893|GO:0034242	54686038	chr12	54685979	-	hs|12q13.13	NM_006163	chr12:54686038-54685979	NM_006163	Hs.75643
A_23_P42282	-8.05992	-3.01077	8.05992	down	complement component 4B (Chido blood group)	C4B	FALSE	Homo sapiens complement component 4B (Chido blood group) (C4B), mRNA [NM_001002029]	721	GO:0044216|GO:0030449|GO:0001848|GO:0004866|GO:0005886|GO:2000427|GO:0072562|GO:0005576|GO:0005615|GO:0010951|GO:0006956|GO:0006954|GO:0045087|GO:0006958|GO:0030246|GO:0008228|GO:0032490|GO:0070062	32002650	chr6	32002329	+	hs|6p21.33	NM_001002029	chr6:32002329-32002650	NM_001002029	Hs.720022
A_23_P132856	-8.04805	-3.00864	8.04805	down	negative regulator of reactive oxygen species	NRROS	FALSE	Homo sapiens negative regulator of reactive oxygen species (NRROS), mRNA [NM_198565]	375387	GO:0006955|GO:0006954|GO:0005886|GO:0005783|GO:0045087|GO:0006801|GO:0005789|GO:0016021	196388574	chr3	196388515	+	hs|3q29	NM_198565	chr3:196388515-196388574	NM_198565	Hs.702186
A_24_P48204	-7.89307	-2.98059	7.89307	down	secreted and transmembrane 1	SECTM1	FALSE	Homo sapiens secreted and transmembrane 1 (SECTM1), mRNA [NM_003004]	6398	GO:0007165|GO:0006955|GO:0005794|GO:0005886|GO:0007498|GO:0016021|GO:0004871|GO:0043123|GO:0005615|GO:0005125|GO:0070062	80279241	chr17	80279182	-	hs|17q25.3	NM_003004	chr17:80279241-80279182	NM_003004	Hs.558009
A_33_P3224710	-7.79155	-2.96191	7.79155	down	transcription factor EC	TFEC	FALSE	Homo sapiens transcription factor EC (TFEC), transcript variant 1, mRNA [NM_012252]	22797	GO:0034605|GO:0006355|GO:0005737|GO:0003700|GO:0003714|GO:0003713|GO:0046983|GO:0005730|GO:0005634|GO:0003677|GO:0006351	115580160	chr7	115580101	-	hs|7q31.2	NM_012252	chr7:115580160-115580101	NM_012252	Hs.125962
A_23_P73809	-7.74466	-2.9532	7.74466	down	leucine-rich repeats and calponin homology (CH) domain containing 2	LRCH2	FALSE	Homo sapiens leucine-rich repeats and calponin homology (CH) domain containing 2 (LRCH2), transcript variant 1, mRNA [NM_020871]	57631		114345721	chrX	114345662	-	hs|Xq23	NM_020871	chrX:114345721-114345662	NM_020871	Hs.65366
A_23_P128974	-7.73787	-2.95194	7.73787	down	basic leucine zipper transcription factor, ATF-like	BATF	FALSE	Homo sapiens basic leucine zipper transcription factor, ATF-like (BATF), mRNA [NM_006399]	10538	GO:0005515|GO:0002320|GO:0006355|GO:0003700|GO:0030330|GO:0072539|GO:0045190|GO:0042832|GO:0005634|GO:0060218|GO:0001816|GO:0072540|GO:0006351|GO:0006974|GO:0043565|GO:0005737|GO:0045064|GO:0043011	76013310	chr14	76013251	+	hs|14q24.3	NM_006399	chr14:76013251-76013310	NM_006399	Hs.509964
A_24_P43826	-7.67231	-2.93966	7.67231	down	early B-cell factor 2	EBF2	FALSE	Homo sapiens early B-cell factor 2 (EBF2), mRNA [NM_022659]	64641	GO:0046983|GO:0007275|GO:0005634|GO:0045893|GO:0003677|GO:0046872|GO:0006351	25715970	chr8	25715911	-	hs|8p21.2	NM_022659	chr8:25715970-25715911	NM_022659	Hs.491292
A_33_P3221129	-7.62065	-2.92991	7.62065	down	LRRN4 C-terminal like	LRRN4CL	FALSE	Homo sapiens LRRN4 C-terminal like (LRRN4CL), mRNA [NM_203422]	221091	GO:0016021	62453945	chr11	62453886	-	hs|11q12.3	NM_203422	chr11:62453945-62453886	NM_203422	Hs.427449
A_32_P452655	-7.60369	-2.9267	7.60369	down	lectin, galactoside-binding, soluble, 9C	LGALS9C	FALSE	Homo sapiens lectin, galactoside-binding, soluble, 9C (LGALS9C), mRNA [NM_001040078]	654346	GO:0030246	18398235	chr17	18398176	+	hs|17p11.2	NM_001040078	chr17:18398176-18398235	NM_001040078	Hs.462402
A_23_P140373	-7.56541	-2.91942	7.56541	down	feline leukemia virus subgroup C cellular receptor family, member 2	FLVCR2	FALSE	Homo sapiens feline leukemia virus subgroup C cellular receptor family, member 2 (FLVCR2), transcript variant 1, mRNA [NM_017791]	55640	GO:0015886|GO:0015232|GO:0005886|GO:0016021|GO:0055085|GO:0020037	76113815	chr14	76113756	+	hs|14q24.3	NM_017791	chr14:76113756-76113815	NM_017791	Hs.509966
A_23_P134835	-7.52491	-2.91167	7.52491	down	chondroitin sulfate N-acetylgalactosaminyltransferase 1	CSGALNACT1	FALSE	Homo sapiens chondroitin sulfate N-acetylgalactosaminyltransferase 1 (CSGALNACT1), transcript variant 2, mRNA [NM_018371]	55790	GO:0008037|GO:0051216|GO:0008283|GO:0044281|GO:0015014|GO:0009653|GO:0046872|GO:0005622|GO:0030206|GO:0030198|GO:0032580|GO:0030204|GO:0047238|GO:0030203|GO:0047237|GO:0050653|GO:0008955|GO:0050650|GO:0050651|GO:0005975|GO:0019276|GO:0015020|GO:0008376|GO:0007399|GO:0030166|GO:0001958|GO:0030173|GO:0000139|GO:0046398|GO:0030210	19262014	chr8	19261955	-	hs|8p21.3	NM_018371	chr8:19262014-19261955	NM_018371	Hs.613729
A_33_P3366258	-7.45459	-2.89813	7.45459	down	methylenetetrahydrofolate dehydrogenase (NADP+ dependent) 2-like	MTHFD2L	FALSE	methylenetetrahydrofolate dehydrogenase (NADP+ dependent) 2-like [Source:HGNC Symbol;Acc:31865] [ENST00000490698]	441024	GO:0005743|GO:0009086|GO:0004329|GO:0004477|GO:0005829|GO:0035999|GO:0005739|GO:0004488|GO:0004487|GO:0009396|GO:0006730|GO:0000105|GO:0055114|GO:0006164	74991233	chr4	74991174	+	hs|4q13.3	XM_005265692	chr4:74991174-74991233	XM_005265692	Hs.740700
A_23_P43164	-7.44399	-2.89608	7.44399	down	sulfatase 1	SULF1	FALSE	Homo sapiens sulfatase 1 (SULF1), transcript variant 3, mRNA [NM_015170]	23213	GO:0005886|GO:0051216|GO:0005783|GO:0048706|GO:0030177|GO:0008449|GO:0005615|GO:0032836|GO:0030513|GO:0002063|GO:0004065|GO:0030201|GO:0048010|GO:0030336|GO:0005794|GO:0005795|GO:0009986|GO:0001822|GO:0005509|GO:0006915|GO:0035860|GO:0010575|GO:0060686|GO:0060384|GO:0060348|GO:0040036|GO:0003094|GO:0001937|GO:0016525|GO:0040037|GO:0045121|GO:0014846	70572254	chr8	70572195	+	hs|8q13.3	NM_015170	chr8:70572195-70572254	NM_015170	Hs.409602
A_19_P00327273	-7.44342	-2.89596	7.44342	down			FALSE				106562403	chr3	106562344	+	hs|3q13.12		chr3:106562344-106562403
A_32_P110472	-7.4339	-2.89412	7.4339	down	iodotyrosine deiodinase	IYD	FALSE	Homo sapiens iodotyrosine deiodinase (IYD), transcript variant 2, mRNA [NM_203395]	389434	GO:0034641|GO:0005886|GO:0004447|GO:0016491|GO:0006590|GO:0044281|GO:0016021|GO:0055114	150725363	chr6	150725304	+	hs|6q25.1	NM_203395	chr6:150725304-150725363	NM_203395	Hs.310225
A_33_P3298930	-7.40101	-2.88772	7.40101	down	uncharacterized LOC102477328	LOC102477328	FALSE	Homo sapiens uncharacterized LOC102477328 (LOC102477328), long non-coding RNA [NR_105007]	102477328		71870050	chr5	71869991	-	hs|5q13.2	NR_105007	chr5:71870050-71869991	NR_105007	Hs.741936
A_24_P192301	-7.33541	-2.87488	7.33541	down	sema domain, immunoglobulin domain (Ig), short basic domain, secreted, (semaphorin) 3A	SEMA3A	FALSE	Homo sapiens sema domain, immunoglobulin domain (Ig), short basic domain, secreted, (semaphorin) 3A (SEMA3A), mRNA [NM_006080]	10371	GO:0030424|GO:0048843|GO:0021675|GO:0048846|GO:0030425|GO:0007413|GO:0021772|GO:0007411|GO:0060666|GO:0004872|GO:2001224|GO:0050919|GO:0006915|GO:0005576|GO:0048485|GO:0048813|GO:0045499|GO:0016020|GO:0002027|GO:0048841|GO:0060385|GO:0048880|GO:0071526|GO:0030215|GO:0001764|GO:0010633	83588248	chr7	83588189	-	hs|7q21.11	NM_006080	chr7:83588248-83588189	NM_006080	Hs.252451
A_24_P6626	-7.33245	-2.8743	7.33245	down	transmembrane protein 132B	TMEM132B	FALSE	Homo sapiens transmembrane protein 132B (TMEM132B), transcript variant 1, mRNA [NM_052907]	114795	GO:0008150|GO:0003674|GO:0016021|GO:0005575	126138921	chr12	126138862	+	hs|12q24.32	NM_052907	chr12:126138862-126138921	NM_052907	Hs.524838
A_33_P3330952	-7.323	-2.87243	7.323	down	ATPase, aminophospholipid transporter (APLT), class I, type 8A, member 1	ATP8A1	FALSE	Homo sapiens ATPase, aminophospholipid transporter (APLT), class I, type 8A, member 1 (ATP8A1), transcript variant 1, mRNA [NM_006095]	10396	GO:0005515|GO:0000287|GO:0005794|GO:0005886|GO:0005783|GO:0055085|GO:0005524|GO:0045332|GO:0019829|GO:0034220|GO:0042584|GO:0004012|GO:0008152|GO:0016021|GO:0006812	42410508	chr4	42410449	-	hs|4p13	NM_006095	chr4:42410508-42410449	NM_006095	Hs.435052
A_23_P201459	-7.26822	-2.8616	7.26822	down	interferon, alpha-inducible protein 6	IFI6	FALSE	Homo sapiens interferon, alpha-inducible protein 6 (IFI6), transcript variant 3, mRNA [NM_022873]	2537	GO:0005739|GO:0005515|GO:0006955|GO:0060337|GO:0005886|GO:0051902|GO:0019221|GO:2001240|GO:0001836|GO:0016021|GO:0043154	27992896	chr1	27992837	-	hs|1p36.11	NM_022873	chr1:27992896-27992837	NM_022873	Hs.523847
A_33_P3212109	-7.25568	-2.85911	7.25568	down	doublecortin domain containing 2	DCDC2	FALSE	Homo sapiens doublecortin domain containing 2 (DCDC2), transcript variant 1, mRNA [NM_016356]	51473	GO:0035556|GO:0048813|GO:0006968|GO:0001764	24172239	chr6	24172180	-	hs|6p22.3	NM_016356	chr6:24172239-24172180	NM_016356	Hs.61345
A_23_P28224	-7.24998	-2.85798	7.24998	down	sodium channel, voltage-gated, type I, alpha subunit	SCN1A	FALSE	Homo sapiens sodium channel, voltage-gated, type I, alpha subunit (SCN1A), transcript variant 2, mRNA [NM_006920]	6323	GO:0030018|GO:0086010|GO:0005886|GO:0005248|GO:0030315|GO:0019227|GO:0019228|GO:0043194|GO:0033268|GO:0014704|GO:0050884|GO:0043025|GO:0007628|GO:0001518|GO:0034765|GO:0035725|GO:0006814	166848025	chr2	166847966	-	hs|2q24.3	NM_006920	chr2:166848025-166847966	NM_006920	Hs.22654
A_23_P45099	-7.24856	-2.85769	7.24856	down	major histocompatibility complex, class II, DR beta 5	HLA-DRB5	FALSE	Homo sapiens major histocompatibility complex, class II, DR beta 5 (HLA-DRB5), mRNA [NM_002125]	3127	GO:0002437|GO:0050852|GO:0005886|GO:0019221|GO:0031295|GO:0042088|GO:0005765|GO:0005615|GO:0042130|GO:0019886|GO:0006955|GO:0002381|GO:0042605|GO:2001179|GO:0071556|GO:0032689|GO:0070062|GO:0060333|GO:0030658|GO:0012507|GO:0051262|GO:0035774|GO:0042613|GO:0032588|GO:0030666|GO:0000139|GO:0031902|GO:0032673|GO:0016045|GO:0030669|GO:0009897|GO:0002455	32485465	chr6	32485406	-	hs|6p21.32	NM_002125	chr6:32485465-32485406	NM_002125	Hs.534322
A_33_P3424217	-7.18143	-2.84427	7.18143	down	major histocompatibility complex, class II, DQ beta 1	HLA-DQB1	FALSE	Homo sapiens major histocompatibility complex, class II, DQ beta 1 (HLA-DQB1), transcript variant 3, mRNA [NM_001243962]	3119	GO:0050852|GO:0012507|GO:0005886|GO:0031295|GO:0019221|GO:0042613|GO:0005765|GO:0032588|GO:0030666|GO:0019886|GO:0006955|GO:0000139|GO:0016020|GO:0002381|GO:0042605|GO:0071556|GO:0032395|GO:0030669|GO:0010008|GO:0060333|GO:0002455|GO:0030658						NM_001243962		NM_001243962	Hs.409934
A_23_P259955	-7.16819	-2.84161	7.16819	down	growth differentiation factor 5	GDF5	FALSE	Homo sapiens growth differentiation factor 5 (GDF5), mRNA [NM_000557]	8200	GO:0035137|GO:0005515|GO:0035136|GO:0005886|GO:0050680|GO:0007267|GO:0005576|GO:0030326|GO:0005125|GO:0005615|GO:0043524|GO:0045666|GO:0002062|GO:0030198|GO:0040014|GO:0007179|GO:0032332|GO:0040007|GO:0008083|GO:2001054	34022206	chr20	34022147	-	hs|20q11.22	NM_000557	chr20:34022206-34022147	NM_000557	Hs.1573
A_23_P151710	-7.13605	-2.83513	7.13605	down	prostaglandin E receptor 2 (subtype EP2), 53kDa	PTGER2	FALSE	Homo sapiens prostaglandin E receptor 2 (subtype EP2), 53kDa (PTGER2), mRNA [NM_000956]	5732	GO:0007186|GO:0005886|GO:0005887|GO:0042127|GO:0032496|GO:0007189|GO:0071380|GO:0004957	52794489	chr14	52794430	+	hs|14q22.1	NM_000956	chr14:52794430-52794489	NM_000956	Hs.2090
A_33_P3241511	-7.11718	-2.83131	7.11718	down	serpin peptidase inhibitor, clade D (heparin cofactor), member 1	SERPIND1	FALSE	Homo sapiens serpin peptidase inhibitor, clade D (heparin cofactor), member 1 (SERPIND1), mRNA [NM_000185]	3053	GO:0030162|GO:0010951|GO:0006935|GO:0004866|GO:0007596|GO:0004867|GO:0005576|GO:0008201|GO:0005615|GO:0070062	21141512	chr22	21141453	+	hs|22q11.21	NM_000185	chr22:21141453-21141512	NM_000185	Hs.474270
A_23_P89780	-7.10954	-2.82976	7.10954	down	laminin, alpha 3	LAMA3	FALSE	Homo sapiens laminin, alpha 3 (LAMA3), transcript variant 1, mRNA [NM_198129]	3909	GO:0030334|GO:0034329|GO:0005102|GO:0005606|GO:0005576|GO:0030155|GO:0005604|GO:0045995|GO:0005610|GO:0008544|GO:0022617|GO:0005198|GO:0030198|GO:0031581|GO:0007155	21534794	chr18	21534735	+	hs|18q11.2	NM_198129	chr18:21534735-21534794	NM_198129	Hs.436367
A_24_P277657	-7.07035	-2.82178	7.07035	down	guanosine monophosphate reductase	GMPR	FALSE	Homo sapiens guanosine monophosphate reductase (GMPR), mRNA [NM_006877]	2766	GO:0006144|GO:0009409|GO:0043101|GO:0055086|GO:0044281|GO:0003920|GO:0046872|GO:0009117|GO:0055114|GO:0005829	16290825	chr6	16290766	+	hs|6p22.3	NM_006877	chr6:16290766-16290825	NM_006877	Hs.484741
A_33_P3376786	-7.01841	-2.81114	7.01841	down			FALSE	PREDICTED: Homo sapiens uncharacterized LOC102724515 (LOC102724515), ncRNA [XR_425415]			75160129	chr2	75160070	+	hs|2p12	XR_425415	chr2:75160070-75160129	XR_425415	Hs.708649
A_33_P3251727	-6.9734	-2.80186	6.9734	down	ryanodine receptor 2 (cardiac)	RYR2	FALSE	Homo sapiens ryanodine receptor 2 (cardiac) (RYR2), mRNA [NM_001035]	6262	GO:0005515|GO:0005516|GO:0030018|GO:0005513|GO:0019722|GO:0035584|GO:0060402|GO:0043621|GO:0060048|GO:0042802|GO:0003143|GO:0034220|GO:0097050|GO:0015278|GO:0086029|GO:0086005|GO:0070062|GO:0005262|GO:0051209|GO:0005509|GO:0071313|GO:0014808|GO:0030509|GO:0086064|GO:0043924|GO:0044325|GO:0043234|GO:0071872|GO:0002027|GO:0070588|GO:0055117|GO:0010460|GO:0019899|GO:0005219|GO:0005218|GO:0034236|GO:…	237996095	chr1	237996036	+	hs|1q43	NM_001035	chr1:237996036-237996095	NM_001035	Hs.109514
A_24_P251734	-6.97159	-2.80149	6.97159	down	follistatin-like 5	FSTL5	FALSE	Homo sapiens follistatin-like 5 (FSTL5), transcript variant 1, mRNA [NM_020116]	56884	GO:0005509|GO:0005576	162305178	chr4	162305119	-	hs|4q32.2	NM_020116	chr4:162305178-162305119	NM_020116	Hs.32452
A_24_P11506	-6.96646	-2.80043	6.96646	down	kynureninase	KYNU	FALSE	Homo sapiens kynureninase (KYNU), transcript variant 2, mRNA [NM_001032998]	8942	GO:0006569|GO:0030429|GO:0044281|GO:0034516|GO:0043420|GO:0042803|GO:0005829|GO:0005739|GO:0097053|GO:0034641|GO:0019805|GO:0019441|GO:0030170|GO:0019442|GO:0034341|GO:0034354	143715278	chr2	143715219	+	hs|2q22.2	NM_001032998	chr2:143715219-143715278	NM_001032998	Hs.470126
A_23_P34382	-6.96055	-2.7992	6.96055	down	chloride channel accessory 3, pseudogene	CLCA3P	FALSE	Homo sapiens chloride channel accessory 3, pseudogene (CLCA3P), non-coding RNA [NR_024604]	9629	GO:0005215|GO:0005262|GO:0005244|GO:0070588|GO:0034707|GO:0006810|GO:0034765|GO:0005615|GO:0005254	87121033	chr1	87120974	+	hs|1p22.3	NR_024604	chr1:87120974-87121033	NR_024604	Hs.673847
A_23_P69497	-6.95069	-2.79716	6.95069	down	C-type lectin domain family 3, member B	CLEC3B	FALSE	Homo sapiens C-type lectin domain family 3, member B (CLEC3B), mRNA [NM_003278]	7123	GO:0001652|GO:0071310|GO:0005509|GO:0071560|GO:0005576|GO:0030282|GO:0005615|GO:0031012|GO:0001501|GO:0005737|GO:0001503|GO:0010756|GO:0030246|GO:0008201|GO:0070062|GO:0036143	45077561	chr3	45077502	+	hs|3p21.31	NM_003278	chr3:45077502-45077561	NM_003278	Hs.476092
A_23_P52266	-6.94772	-2.79654	6.94772	down	interferon-induced protein with tetratricopeptide repeats 1	IFIT1	FALSE	Homo sapiens interferon-induced protein with tetratricopeptide repeats 1 (IFIT1), transcript variant 1, mRNA [NM_001548]	3434	GO:0005515|GO:0032091|GO:0019060|GO:0050689|GO:0003723|GO:0019221|GO:0051097|GO:0009615|GO:0005829|GO:0071360|GO:0005737|GO:0051607|GO:0060337|GO:0071357|GO:0045070|GO:0045071	91163497	chr10	91163438	+	hs|10q23.31	NM_001548	chr10:91163438-91163497	NM_001548	Hs.20315
A_23_P139786	-6.92444	-2.7917	6.92444	down	2'-5'-oligoadenylate synthetase-like	OASL	FALSE	Homo sapiens 2'-5'-oligoadenylate synthetase-like (OASL), transcript variant 1, mRNA [NM_003733]	8638	GO:0003725|GO:0001730|GO:0019221|GO:0005730|GO:0009615|GO:0003677|GO:0005524|GO:0005829|GO:0046966|GO:0005737|GO:0051607|GO:0060337|GO:0008152|GO:0060333|GO:0045071	121458379	chr12	121458320	-	hs|12q24.31	NM_003733	chr12:121458379-121458320	NM_003733	Hs.118633
A_33_P3441031	-6.92179	-2.79114	6.92179	down	long intergenic non-protein coding RNA 944	LINC00944	FALSE	Homo sapiens cDNA clone IMAGE:5267655. [BC038732]	387895		127220071	chr12	127220012	-	hs|12q24.32	BC038732	chr12:127220071-127220012		Hs.534660
A_23_P10121	-6.9027	-2.78716	6.9027	down	secreted frizzled-related protein 1	SFRP1	FALSE	Homo sapiens secreted frizzled-related protein 1 (SFRP1), mRNA [NM_003012]	6422	GO:0008406|GO:0005515|GO:0001657|GO:0014070|GO:0017147|GO:0030308|GO:0033689|GO:0030307|GO:0050680|GO:0010564|GO:0042995|GO:0005615|GO:0032855|GO:0042802|GO:0005109|GO:0005622|GO:0014034|GO:0006508|GO:0046676|GO:0001944|GO:0050679|GO:0030336|GO:0009986|GO:0001843|GO:0030165|GO:0048546|GO:0001649|GO:0007420|GO:0045600|GO:0045893|GO:0045892|GO:0001954|GO:0045578|GO:0008284|GO:0008285|GO:0005886|GO:…	41120220	chr8	41120161	-	hs|8p11.21	NM_003012	chr8:41120220-41120161	NM_003012	Hs.213424
A_23_P116557	-6.88816	-2.78412	6.88816	down	lectin, galactoside-binding, soluble, 9	LGALS9	FALSE	Homo sapiens lectin, galactoside-binding, soluble, 9 (LGALS9), transcript variant 1, mRNA [NM_009587]	3965	GO:0007165|GO:0005737|GO:0005534|GO:0030246|GO:0004871|GO:0043123|GO:0070062	25975920	chr17	25974458	+	hs|17q11.2	NM_009587	chr17:25974458-25975920	NM_009587	Hs.81337
A_24_P288836	-6.83109	-2.77212	6.83109	down	major histocompatibility complex, class II, DP beta 2 (pseudogene)	HLA-DPB2	FALSE	Homo sapiens major histocompatibility complex, class II, DP beta 2 (pseudogene) (HLA-DPB2), non-coding RNA [NR_001435]	3116		33096481	chr6	33096422	+	hs|6p21.32	NR_001435	chr6:33096422-33096481	NR_001435	Hs.665450
A_23_P107612	-6.81774	-2.76929	6.81774	down	RAB27B, member RAS oncogene family	RAB27B	FALSE	Homo sapiens RAB27B, member RAS oncogene family (RAB27B), mRNA [NM_004163]	5874	GO:0005795|GO:0007264|GO:0019904|GO:0003924|GO:0032585|GO:0005525|GO:0015031|GO:0006184|GO:0045921|GO:0016324|GO:0071985|GO:0042589|GO:0019003|GO:0030140|GO:0070062	52556691	chr18	52556632	+	hs|18q21.2	NM_004163	chr18:52556632-52556691	NM_004163	Hs.25318
A_24_P15388	-6.80699	-2.76702	6.80699	down			FALSE	immunoglobulin heavy variable 3-74 [Source:HGNC Symbol;Acc:5624] [ENST00000424969]			107218747	chr14	107218688	-	hs|14q32.33	XM_006710246	chr14:107218747-107218688	XM_006710246	Hs.595878
A_33_P3210399	-6.80406	-2.7664	6.80406	down	solute carrier family 14 (urea transporter), member 1 (Kidd blood group)	SLC14A1	FALSE	Homo sapiens solute carrier family 14 (urea transporter), member 1 (Kidd blood group) (SLC14A1), transcript variant 4, mRNA [NM_001146037]	6563	GO:0016323|GO:0005886|GO:0005887|GO:0005372|GO:0015265|GO:0015204|GO:0006833|GO:0071918|GO:0055085|GO:0015840	43329871	chr18	43329812	+	hs|18q12.3	NM_001146037	chr18:43329812-43329871	NM_001146037	Hs.101307
A_19_P00316467	-6.79859	-2.76524	6.79859	down	long intergenic non-protein coding RNA 973	LINC00973	FALSE	long intergenic non-protein coding RNA 973 [Source:HGNC Symbol;Acc:48868] [ENST00000473756]	100506377		98700158	chr3	98700099	+	hs|3q12.1	TCONS_00005559	chr3:98700099-98700158		Hs.307772
A_33_P3251841	-6.7326	-2.75116	6.7326	down	dermatan sulfate epimerase-like	DSEL	FALSE	Homo sapiens dermatan sulfate epimerase-like (DSEL), mRNA [NM_032160]	92126	GO:0030208|GO:0000139|GO:0005975|GO:0008146|GO:0044281|GO:0016021|GO:0030204|GO:0016853|GO:0030203	65179037	chr18	65178978	-	hs|18q22.1	NM_032160	chr18:65179037-65178978	NM_032160	Hs.124673
A_23_P252758	-6.71753	-2.74793	6.71753	down	Kell blood group, metallo-endopeptidase	KEL	FALSE	Homo sapiens Kell blood group, metallo-endopeptidase (KEL), mRNA [NM_000420]	3792	GO:0005515|GO:0005886|GO:0042310|GO:0006508|GO:0016021|GO:0004222|GO:0046872	142640666	chr7	142640607	-	hs|7q34	NM_000420	chr7:142640666-142640607	NM_000420	Hs.368588
A_24_P315346	-6.70102	-2.74438	6.70102	down	POM121 transmembrane nucleoporin-like 8 pseudogene	POM121L8P	FALSE	Homo sapiens POM121 transmembrane nucleoporin-like 8 pseudogene (POM121L8P), non-coding RNA [NR_024583]	29797		21637901	chr22	21637842	+	hs|22q11.21	NR_024583	chr22:21637842-21637901	NR_024583	Hs.396963
A_32_P186731	-6.66611	-2.73684	6.66611	down	isthmin 1, angiogenesis inhibitor	ISM1	FALSE	Homo sapiens isthmin 1, angiogenesis inhibitor (ISM1), mRNA [NM_080826]	140862	GO:0005576	13280897	chr20	13280838	+	hs|20p12.1	NM_080826	chr20:13280838-13280897	NM_080826	Hs.559353
A_23_P385105	-6.65358	-2.73413	6.65358	down	phospholipase C, delta 4	PLCD4	FALSE	Homo sapiens phospholipase C, delta 4 (PLCD4), mRNA [NM_032726]	84812	GO:0035556|GO:0016042|GO:0016020|GO:0005783|GO:0004435|GO:0046488|GO:0005509|GO:0005634|GO:0007340|GO:0004871	219501824	chr2	219501765	+	hs|2q35	NM_032726	chr2:219501765-219501824	NM_032726	Hs.632528
A_23_P88880	-6.63976	-2.73113	6.63976	down	zinc finger protein 423	ZNF423	FALSE	Homo sapiens zinc finger protein 423 (ZNF423), transcript variant 1, mRNA [NM_015069]	23090	GO:0005515|GO:0030513|GO:0007219|GO:0005634|GO:0045893|GO:0045892|GO:0003677|GO:0046872|GO:0030154|GO:0006351|GO:0007399	49524947	chr16	49524888	-	hs|16q12.1	NM_015069	chr16:49524947-49524888	NM_015069	Hs.530930
A_23_P24004	-6.59235	-2.72079	6.59235	down	interferon-induced protein with tetratricopeptide repeats 2	IFIT2	FALSE	Homo sapiens interferon-induced protein with tetratricopeptide repeats 2 (IFIT2), mRNA [NM_001547]	3433	GO:0032091|GO:0005515|GO:0051607|GO:0005737|GO:0060337|GO:0043065|GO:0008637|GO:0035457|GO:0005783|GO:0019221|GO:0009615|GO:0005829	91068456	chr10	91068397	+	hs|10q23.31	NM_001547	chr10:91068397-91068456	NM_001547	Hs.437609
A_32_P141238	-6.56845	-2.71555	6.56845	down	anoctamin 2, calcium activated chloride channel	ANO2	FALSE	Homo sapiens anoctamin 2, calcium activated chloride channel (ANO2), transcript variant 2, mRNA [NM_001278597]	57101	GO:0034220|GO:0005886|GO:0034707|GO:0005730|GO:0005229|GO:0005634|GO:0055085	5671939	chr12	5671880	-	hs|12p13.31	NM_001278597	chr12:5671939-5671880	NM_001278597	Hs.148970
A_33_P3303245	-6.54249	-2.70984	6.54249	down	v-kit Hardy-Zuckerman 4 feline sarcoma viral oncogene homolog	KIT	FALSE	Homo sapiens v-kit Hardy-Zuckerman 4 feline sarcoma viral oncogene homolog (KIT), transcript variant 2, mRNA [NM_001093772]	3815	GO:0005515|GO:0008360|GO:0019221|GO:0007286|GO:0007283|GO:0002020|GO:0005615|GO:0042803|GO:0035234|GO:0043069|GO:0043552|GO:0007173|GO:0042127|GO:0031274|GO:0002327|GO:0038162|GO:0023014|GO:0002320|GO:0043303|GO:0030335|GO:0006687|GO:0031532|GO:0032762|GO:0014068|GO:0018108|GO:0035855|GO:0019955|GO:0008543|GO:0045087|GO:0008542|GO:0038093|GO:0002371|GO:0009898|GO:0002318|GO:0038095|GO:0009897|GO:…	55570024	chr4	55569965	+	hs|4q12	NM_001093772	chr4:55569965-55570024	NM_001093772	Hs.479754
A_23_P55616	-6.53651	-2.70852	6.53651	down	solute carrier family 14 (urea transporter), member 1 (Kidd blood group)	SLC14A1	FALSE	Homo sapiens solute carrier family 14 (urea transporter), member 1 (Kidd blood group) (SLC14A1), transcript variant 4, mRNA [NM_001146037]	6563	GO:0016323|GO:0005886|GO:0005887|GO:0005372|GO:0015265|GO:0015204|GO:0006833|GO:0071918|GO:0055085|GO:0015840	43330300	chr18	43330241	+	hs|18q12.3	NM_001146037	chr18:43330241-43330300	NM_001146037	Hs.101307
A_19_P00322745	-6.49312	-2.69891	6.49312	down			FALSE	PREDICTED: Homo sapiens uncharacterized LOC101928011 (LOC101928011), ncRNA [XR_244302]			29818670	chr21	29818611	-	hs|21q21.3	XR_244302	chr21:29818670-29818611	XR_244302	Hs.685200
A_33_P3214570	-6.45875	-2.69125	6.45875	down		XLOC_014512	FALSE	BROAD Institute lincRNA (XLOC_014512), lincRNA [TCONS_l2_00020436]			14142017	chr4	14141958	+	hs|4p15.33		chr4:14141958-14142017
A_33_P3302957	-6.41158	-2.68068	6.41158	down	pleckstrin homology domain containing, family G (with RhoGef domain) member 4	PLEKHG4	FALSE	Homo sapiens pleckstrin homology domain containing, family G (with RhoGef domain) member 4 (PLEKHG4), transcript variant 1, mRNA [NM_015432]	25894	GO:0032319|GO:0005089	67322925	chr16	67322866	+	hs|16q22.1	NM_015432	chr16:67322866-67322925	NM_015432	Hs.188781
A_32_P196021	-6.40359	-2.67888	6.40359	down	fibroblast growth factor 7	FGF7	FALSE	Homo sapiens fibroblast growth factor 7 (FGF7), mRNA [NM_002009]	2252	GO:0008286|GO:0005515|GO:0010838|GO:0008284|GO:0051549|GO:0010463|GO:0050731|GO:0031069|GO:0060665|GO:0007173|GO:0060501|GO:0051781|GO:0008201|GO:0050679|GO:0048011|GO:0005794|GO:0031532|GO:0048015|GO:0009611|GO:0005576|GO:0005104|GO:0042056|GO:0050918|GO:0007165|GO:0008544|GO:0008543|GO:0034394|GO:0045087|GO:0061033|GO:0008083|GO:0038095|GO:0060445	49778611	chr15	49778552	+	hs|15q21.2		chr15:49778552-49778611	NM_002009	Hs.567268
A_23_P118615	-6.40291	-2.67873	6.40291	down	ATP-binding cassette, sub-family A (ABC1), member 8	ABCA8	FALSE	Homo sapiens ATP-binding cassette, sub-family A (ABC1), member 8 (ABCA8), transcript variant 2, mRNA [NM_007168]	10351	GO:0006200|GO:0005886|GO:0006810|GO:0005743|GO:0042626|GO:0016021|GO:0055085|GO:0005524	66865909	chr17	66865850	-	hs|17q24.2	NM_007168	chr17:66865909-66865850	NM_007168	Hs.58351
A_24_P335305	-6.39506	-2.67696	6.39506	down	2'-5'-oligoadenylate synthetase 3, 100kDa	OAS3	FALSE	Homo sapiens 2'-5'-oligoadenylate synthetase 3, 100kDa (OAS3), mRNA [NM_006187]	4940	GO:0003725|GO:0005515|GO:0005886|GO:0001730|GO:0019221|GO:0005730|GO:0005634|GO:0009615|GO:0005524|GO:0005615|GO:0046872|GO:0043231|GO:0005829|GO:0051607|GO:0005737|GO:0006139|GO:0060337|GO:0060700|GO:0060333|GO:0045071	113410190	chr12	113410131	+	hs|12q24.13	NM_006187	chr12:113410131-113410190	NM_006187	Hs.744211
A_23_P140821	-6.31073	-2.65781	6.31073	down	par-6 family cell polarity regulator alpha	PARD6A	FALSE	Homo sapiens par-6 family cell polarity regulator alpha (PARD6A), transcript variant 1, mRNA [NM_016948]	50855	GO:0005515|GO:0005886|GO:0034329|GO:0045177|GO:0005634|GO:0001726|GO:0045216|GO:0045217|GO:0005829|GO:0043234|GO:0030742|GO:0007049|GO:0070830|GO:0005080|GO:0016032|GO:0007179|GO:0017048|GO:0005923|GO:0005938|GO:0051301|GO:0008134	67696221	chr16	67696162	+	hs|16q22.1	NM_016948	chr16:67696162-67696221	NM_016948	Hs.112933
A_23_P29922	-6.27759	-2.65021	6.27759	down	toll-like receptor 3	TLR3	FALSE	Homo sapiens toll-like receptor 3 (TLR3), mRNA [NM_003265]	7098	GO:0005515|GO:0032755|GO:0034123|GO:0046330|GO:0007249|GO:0005765|GO:0032757|GO:0002756|GO:0051607|GO:0045078|GO:0009597|GO:0043123|GO:0042742|GO:0032728|GO:0009986|GO:0032760|GO:0032722|GO:0002224|GO:0045359|GO:0071346|GO:0005887|GO:0052033|GO:0045087|GO:0045356|GO:0005789|GO:0035666|GO:0010008|GO:0004888|GO:0045080|GO:0003725|GO:0042346|GO:0034142|GO:0035458|GO:0032735|GO:0005737|GO:0051092|GO:…	187005949	chr4	187005890	+	hs|4q35.1	NM_003265	chr4:187005890-187005949	NM_003265	Hs.657724
A_23_P144348	-6.22612	-2.63833	6.22612	down	slit homolog 2 (Drosophila)	SLIT2	FALSE	Homo sapiens slit homolog 2 (Drosophila) (SLIT2), transcript variant 1, mRNA [NM_004787]	9353	GO:0001656|GO:0005515|GO:0001657|GO:0090260|GO:0071676|GO:0030308|GO:0048846|GO:0005615|GO:0048495|GO:0071672|GO:0042803|GO:0042802|GO:0016337|GO:0070100|GO:0007411|GO:0030837|GO:0070062|GO:0021972|GO:0030336|GO:0009986|GO:0005509|GO:0043394|GO:0060763|GO:0061364|GO:0001701|GO:0021836|GO:0035385|GO:0043086|GO:0051414|GO:0021834|GO:0010596|GO:0008045|GO:0045499|GO:0043237|GO:0090024|GO:0050772|GO:…	20620491	chr4	20620432	+	hs|4p15.31	NM_004787	chr4:20620432-20620491	NM_004787	Hs.29802
A_23_P71328	-6.17642	-2.62677	6.17642	down	matrilin 2	MATN2	FALSE	Homo sapiens matrilin 2 (MATN2), transcript variant 2, mRNA [NM_030583]	4147	GO:0031012|GO:0005515|GO:0008150|GO:0003674|GO:0031104|GO:0008347|GO:0007411|GO:0005509|GO:0005578|GO:0001764|GO:0048678|GO:0005604	99042814	chr8	99042755	+	hs|8q22.2	NM_030583	chr8:99042755-99042814	NM_030583	Hs.189445
A_33_P3421728	-6.13161	-2.61627	6.13161	down	diacylglycerol kinase, gamma 90kDa	DGKG	FALSE	Homo sapiens diacylglycerol kinase, gamma 90kDa (DGKG), transcript variant 1, mRNA [NM_001346]	1608	GO:0005886|GO:0005509|GO:0030168|GO:0005524|GO:0007205|GO:0043231|GO:0035556|GO:0007165|GO:0016310|GO:0005737|GO:0003951|GO:0048666|GO:0007596|GO:0004143	185865094	chr3	185865035	-	hs|3q27.2	NM_001346	chr3:185865094-185865035	NM_001346	Hs.683449
A_33_P3300262	-6.10766	-2.61062	6.10766	down	vitrin	VIT	FALSE	Homo sapiens vitrin (VIT), transcript variant 5, mRNA [NM_001177972]	5212	GO:0030198|GO:0010811|GO:0005539|GO:0005614	36986818	chr2	36986759	+	hs|2p22.2	NM_001177972	chr2:36986759-36986818	NM_001177972	Hs.137415
A_23_P321354	-6.07553	-2.60301	6.07553	down	transmembrane protein 71	TMEM71	FALSE	Homo sapiens transmembrane protein 71 (TMEM71), transcript variant 1, mRNA [NM_144649]	137835	GO:0016021	133722596	chr8	133722537	-	hs|8q24.22	NM_144649	chr8:133722596-133722537	NM_144649	Hs.293842
A_23_P14174	-6.07026	-2.60176	6.07026	down	tumor necrosis factor (ligand) superfamily, member 13b	TNFSF13B	FALSE	Homo sapiens tumor necrosis factor (ligand) superfamily, member 13b (TNFSF13B), transcript variant 1, mRNA [NM_006573]	10673	GO:0005515|GO:0005164|GO:0048471|GO:0008284|GO:0001782|GO:0005886|GO:0030890|GO:0008283|GO:0031296|GO:0031295|GO:0005102|GO:0005125|GO:0005615|GO:0007165|GO:0005737|GO:0006955|GO:0042102|GO:0002636|GO:0016021|GO:0048305	108922752	chr13	108922693	+	hs|13q33.3	NM_006573	chr13:108922693-108922752	NM_006573	Hs.525157
A_33_P3284508	-6.06616	-2.60078	6.06616	down	CD14 molecule	CD14	FALSE	Homo sapiens CD14 molecule (CD14), transcript variant 3, mRNA [NM_001174104]	929	GO:0006909|GO:0005515|GO:0034142|GO:0070891|GO:0005886|GO:0009408|GO:0045471|GO:0007249|GO:0050715|GO:0031225|GO:0005615|GO:0045807|GO:0002756|GO:0006954|GO:0002755|GO:0032026|GO:0034138|GO:0070062|GO:0038124|GO:0016019|GO:0038123|GO:0009986|GO:0032760|GO:0001847|GO:0034134|GO:0006915|GO:0005576|GO:0002224|GO:0001530|GO:0071223|GO:0071222|GO:0045087|GO:0045121|GO:0035666|GO:0034612|GO:0007166|GO:…	140011377	chr5	140011318	-	hs|5q31.3	NM_001174104	chr5:140011377-140011318	NM_001174104	Hs.163867
A_23_P209625	-6.0592	-2.59913	6.0592	down	cytochrome P450, family 1, subfamily B, polypeptide 1	CYP1B1	FALSE	Homo sapiens cytochrome P450, family 1, subfamily B, polypeptide 1 (CYP1B1), mRNA [NM_000104]	1545	GO:0033629|GO:0019369|GO:0006725|GO:0070301|GO:0006805|GO:0008285|GO:0048514|GO:0044281|GO:0006809|GO:0005739|GO:0004497|GO:0042574|GO:0030199|GO:0042572|GO:0016712|GO:0007155|GO:0008202|GO:0030336|GO:0046466|GO:0043065|GO:0070330|GO:0005506|GO:0019373|GO:0008631|GO:0071603|GO:0009636|GO:0032088|GO:0001525|GO:0010575|GO:0045766|GO:0046427|GO:0008210|GO:0071407|GO:0061304|GO:0019825|GO:0043542|GO:…	38295503	chr2	38295444	-	hs|2p22.2	NM_000104	chr2:38295503-38295444	NM_000104	Hs.154654
A_23_P214011	-6.01718	-2.58909	6.01718	down	cadherin 6, type 2, K-cadherin (fetal kidney)	CDH6	FALSE	Homo sapiens cadherin 6, type 2, K-cadherin (fetal kidney) (CDH6), mRNA [NM_004932]	1004	GO:0005886|GO:0034329|GO:0005509|GO:0016021|GO:0007155|GO:0007156|GO:0045216|GO:0070062|GO:0034332	31324266	chr5	31324207	+	hs|5p13.3	NM_004932	chr5:31324207-31324266	NM_004932	Hs.124776
A_23_P94338	-6.00469	-2.58609	6.00469	down	ectonucleotide pyrophosphatase/phosphodiesterase 2	ENPP2	FALSE	Homo sapiens ectonucleotide pyrophosphatase/phosphodiesterase 2 (ENPP2), transcript variant 1, mRNA [NM_006209]	5168	GO:0030334|GO:0090305|GO:0005886|GO:0005509|GO:0004551|GO:0006928|GO:0006796|GO:0003676|GO:0005615|GO:0006898|GO:0006955|GO:0004528|GO:0016787|GO:0007186|GO:0006935|GO:0005887|GO:0004622|GO:0047391|GO:0030247|GO:0008270|GO:0034638|GO:0009395|GO:0008134|GO:0005044	120581567	chr8	120581508	-	hs|8q24.12	NM_006209	chr8:120581567-120581508	NM_006209	Hs.190977
A_23_P8702	-5.99976	-2.58491	5.99976	down	prolactin-induced protein	PIP	FALSE	Homo sapiens prolactin-induced protein (PIP), mRNA [NM_002652]	5304	GO:0005515|GO:0070233|GO:0003779|GO:0005634|GO:0005615|GO:0010628|GO:0016324|GO:0001948|GO:0001895|GO:0019864|GO:0006508|GO:0046983|GO:0004190|GO:0001580|GO:0070062	142836804	chr7	142836745	+	hs|7q34	NM_002652	chr7:142836745-142836804	NM_002652	Hs.99949
A_33_P3261947	-5.97321	-2.57851	5.97321	down	syntrophin, gamma 1	SNTG1	FALSE	Homo sapiens syntrophin, gamma 1 (SNTG1), transcript variant 1, mRNA [NM_018967]	54212	GO:0005737|GO:0007154|GO:0016013|GO:0032587|GO:0005634|GO:0003779|GO:0008022|GO:0005856	51705421	chr8	51705362	+	hs|8q11.21	NM_018967	chr8:51705362-51705421	NM_018967	Hs.584914
A_33_P3290343	-5.95975	-2.57525	5.95975	down	cytochrome P450, family 1, subfamily B, polypeptide 1	CYP1B1	FALSE	Homo sapiens cytochrome P450, family 1, subfamily B, polypeptide 1 (CYP1B1), mRNA [NM_000104]	1545	GO:0033629|GO:0019369|GO:0006725|GO:0070301|GO:0006805|GO:0008285|GO:0048514|GO:0044281|GO:0006809|GO:0005739|GO:0004497|GO:0042574|GO:0030199|GO:0042572|GO:0016712|GO:0007155|GO:0008202|GO:0030336|GO:0046466|GO:0043065|GO:0070330|GO:0005506|GO:0019373|GO:0008631|GO:0071603|GO:0009636|GO:0032088|GO:0001525|GO:0010575|GO:0045766|GO:0046427|GO:0008210|GO:0071407|GO:0061304|GO:0019825|GO:0043542|GO:…	38297765	chr2	38297706	-	hs|2p22.2	NM_000104	chr2:38297765-38297706	NM_000104	Hs.154654
A_23_P300033	-5.95631	-2.57442	5.95631	down	platelet-derived growth factor receptor, alpha polypeptide	PDGFRA	FALSE	Homo sapiens platelet-derived growth factor receptor, alpha polypeptide (PDGFRA), mRNA [NM_006206]	5156	GO:0005515|GO:0001553|GO:0031226|GO:0048704|GO:0048701|GO:0042803|GO:2000249|GO:0030539|GO:0072277|GO:0046777|GO:0007173|GO:0043552|GO:0030198|GO:0035790|GO:0055003|GO:0070374|GO:0038085|GO:0030335|GO:0023019|GO:0048407|GO:0045740|GO:0018108|GO:0014068|GO:0005161|GO:0001701|GO:0008543|GO:0005887|GO:0045087|GO:0042060|GO:0038091|GO:0009897|GO:0038095|GO:0010544|GO:0008284|GO:0005018|GO:0005886|GO:…	55164048	chr4	55163989	+	hs|4q12	NM_006206	chr4:55163989-55164048	NM_006206	Hs.74615
A_23_P406025	-5.94381	-2.57139	5.94381	down	prune homolog 2 (Drosophila)	PRUNE2	FALSE	Homo sapiens prune homolog 2 (Drosophila) (PRUNE2), mRNA [NM_015225]	158471	GO:0016462|GO:0005737|GO:0008152|GO:0006915|GO:0046872	79226442	chr9	79226383	-	hs|9q21.2	NM_015225	chr9:79226442-79226383	NM_015225	Hs.262857
A_24_P220485	-5.94166	-2.57087	5.94166	down	olfactomedin-like 2A	OLFML2A	FALSE	Homo sapiens olfactomedin-like 2A (OLFML2A), transcript variant 1, mRNA [NM_182487]	169611	GO:0031012|GO:0030198|GO:0050840|GO:0005576|GO:0042803	127577079	chr9	127577020	+	hs|9q33.3	NM_182487	chr9:127577020-127577079	NM_182487	Hs.357004
A_33_P3341601	-5.9412	-2.57076	5.9412	down	WD repeat domain 86	WDR86	FALSE	Homo sapiens WD repeat domain 86 (WDR86), transcript variant 1, mRNA [NM_001284260]	349136		151078309	chr7	151078250	-	hs|7q36.1	NM_001284260	chr7:151078309-151078250	NM_001284260	Hs.647083
A_23_P18017	-5.88751	-2.55766	5.88751	down	carboxypeptidase A3 (mast cell)	CPA3	FALSE	Homo sapiens carboxypeptidase A3 (mast cell) (CPA3), mRNA [NM_001870]	1359	GO:0030133|GO:0002003|GO:0006508|GO:0008270|GO:0005576|GO:0030141|GO:0044267|GO:0004181	148614524	chr3	148614465	+	hs|3q24	NM_001870	chr3:148614465-148614524	NM_001870	Hs.646
A_33_P3412087	-5.85509	-2.54969	5.85509	down	coiled-coil domain containing 170	CCDC170	FALSE	Homo sapiens coiled-coil domain containing 170 (CCDC170), mRNA [NM_025059]	80129		151939860	chr6	151939801	+	hs|6q25.1	NM_025059	chr6:151939801-151939860	NM_025059	Hs.660044
A_33_P3262685	-5.85349	-2.5493	5.85349	down	POM121 transmembrane nucleoporin-like 1, pseudogene	POM121L1P	FALSE	Homo sapiens POM121 transmembrane nucleoporin-like 1, pseudogene (POM121L1P), non-coding RNA [NR_024591]	25812		22975037	chr22	22974978	-	hs|22q11.22		chr22:22975037-22974978	NR_024591	Hs.367764
A_23_P106362	-5.8348	-2.54468	5.8348	down	aquaporin 9	AQP9	FALSE	Homo sapiens aquaporin 9 (AQP9), mRNA [NM_020980]	366	GO:0005886|GO:0006863|GO:0005275|GO:0043231|GO:0030104|GO:0016323|GO:0046942|GO:0006955|GO:0046943|GO:0005350|GO:0015791|GO:0015250|GO:0015793|GO:0015837|GO:0006810|GO:0005372|GO:0006833|GO:0015254|GO:0015855|GO:0007588|GO:0010033|GO:0006970|GO:0055085|GO:0072531|GO:0005887|GO:0015166|GO:0008152|GO:0015722|GO:0005345|GO:0015288|GO:0016021|GO:0071320|GO:0046689	58477943	chr15	58477884	+	hs|15q21.3	NM_020980	chr15:58477884-58477943	NM_020980	Hs.104624
A_33_P3300232	-5.83372	-2.54442	5.83372	down	HYDIN, axonemal central pair apparatus protein	HYDIN	FALSE	Homo sapiens HYDIN, axonemal central pair apparatus protein (HYDIN), transcript variant 1, mRNA [NM_001270974]	54768	GO:0005929	71007306	chr16	71007247	-	hs|16q22.2	NM_001270974	chr16:71007306-71007247	NM_001270974	Hs.461229
A_33_P3399571	-5.81954	-2.54091	5.81954	down	vanin 1	VNN1	FALSE	Homo sapiens vanin 1 (VNN1), mRNA [NM_004666]	8876	GO:0033089|GO:0002526|GO:0034235|GO:0005886|GO:0015939|GO:0006928|GO:0002544|GO:0031225|GO:0017159|GO:0016337|GO:0006954|GO:0045087|GO:0016021|GO:0006979|GO:0070062	133002860	chr6	133002801	-	hs|6q23.2	NM_004666	chr6:133002860-133002801	NM_004666	Hs.12114
A_23_P106906	-5.81074	-2.53872	5.81074	down	periplakin	PPL	FALSE	Homo sapiens periplakin (PPL), mRNA [NM_002705]	5493	GO:0030057|GO:0005739|GO:0005515|GO:0005886|GO:0031424|GO:0005200|GO:0005634|GO:0005856|GO:0070062	4933127	chr16	4933068	-	hs|16p13.3	NM_002705	chr16:4933127-4933068	NM_002705	Hs.192233
A_23_P45871	-5.80501	-2.5373	5.80501	down	interferon-induced protein 44-like	IFI44L	FALSE	Homo sapiens interferon-induced protein 44-like (IFI44L), mRNA [NM_006820]	10964	GO:0051607|GO:0006955|GO:0005737	79107649	chr1	79107590	+	hs|1p31.1	NM_006820	chr1:79107590-79107649	NM_006820	Hs.744918
A_32_P2452	-5.76263	-2.52673	5.76263	down	transmembrane and tetratricopeptide repeat containing 1	TMTC1	FALSE	Homo sapiens transmembrane and tetratricopeptide repeat containing 1 (TMTC1), transcript variant 2, mRNA [NM_175861]	83857	GO:0005739|GO:0016021	29653922	chr12	29653863	-	hs|12p11.22	NM_175861	chr12:29653922-29653863	NM_175861	Hs.401954
A_23_P203957	-5.7522	-2.52411	5.7522	down	transmembrane and tetratricopeptide repeat containing 1	TMTC1	FALSE	Homo sapiens transmembrane and tetratricopeptide repeat containing 1 (TMTC1), transcript variant 2, mRNA [NM_175861]	83857	GO:0005739|GO:0016021	29659276	chr12	29659217	-	hs|12p11.22	NM_175861	chr12:29659276-29659217	NM_175861	Hs.401954
A_33_P3240843	-5.71537	-2.51485	5.71537	down	transmembrane protein 71	TMEM71	FALSE	Homo sapiens transmembrane protein 71 (TMEM71), transcript variant 1, mRNA [NM_144649]	137835	GO:0016021	133734346	chr8	133734287	-	hs|8q24.22	NM_144649	chr8:133734346-133734287	NM_144649	Hs.293842
A_23_P70785	-5.63328	-2.49398	5.63328	down	absent in melanoma 1	AIM1	FALSE	Homo sapiens absent in melanoma 1 (AIM1), mRNA [NM_001624]	202	GO:0008150|GO:0003674|GO:0005575	107017822	chr6	107017763	+	hs|6q21	NM_001624	chr6:107017763-107017822	NM_001624	Hs.744905
A_23_P82503	-5.62749	-2.49249	5.62749	down	paternally expressed 10	PEG10	FALSE	Homo sapiens paternally expressed 10 (PEG10), transcript variant 1, mRNA [NM_001040152]	23089	GO:0005515|GO:0005737|GO:0006915|GO:0008270|GO:0005634|GO:0001890|GO:0003677|GO:0030512|GO:0030154	94298623	chr7	94298564	+	hs|7q21.3	NM_001040152	chr7:94298564-94298623	NM_001040152	Hs.147492
A_23_P118042	-5.60215	-2.48598	5.60215	down	leucine rich repeat containing 36	LRRC36	FALSE	Homo sapiens leucine rich repeat containing 36 (LRRC36), transcript variant 1, mRNA [NM_018296]	55282		67419093	chr16	67419034	+	hs|16q22.1	NM_018296	chr16:67419034-67419093	NM_018296	Hs.125139
A_33_P3421028	-5.57958	-2.48016	5.57958	down	c-ros oncogene 1 , receptor tyrosine kinase	ROS1	FALSE	c-ros oncogene 1 , receptor tyrosine kinase [Source:HGNC Symbol;Acc:10261] [ENST00000403284]	6098	GO:0005515|GO:0032006|GO:0005886|GO:0008283|GO:0019903|GO:0018108|GO:0007283|GO:0005524|GO:0030154|GO:0002066|GO:0016020|GO:0010629|GO:0016049|GO:0006468|GO:0016021|GO:0004713|GO:0004714|GO:0070372|GO:0007169|GO:0010966	117649719	chr6	117649660	-	hs|6q22.1		chr6:117649719-117649660
A_23_P42306	-5.57607	-2.47925	5.57607	down	major histocompatibility complex, class II, DM alpha	HLA-DMA	FALSE	Homo sapiens major histocompatibility complex, class II, DM alpha (HLA-DMA), mRNA [NM_006120]	3108	GO:0048839|GO:0016064|GO:0009986|GO:0005771|GO:0002503|GO:0042613|GO:0005765|GO:0015031|GO:0045059|GO:0019886|GO:0050778|GO:0031902|GO:0051085|GO:0023026|GO:0016021|GO:0045582|GO:0070062	32916625	chr6	32916566	-	hs|6p21.32	NM_006120	chr6:32916625-32916566	NM_006120	Hs.728759
A_32_P8546	-5.57568	-2.47915	5.57568	down	long intergenic non-protein coding RNA 473	LINC00473	FALSE	Homo sapiens long intergenic non-protein coding RNA 473 (LINC00473), transcript variant 1, long non-coding RNA [NR_026860]	90632	GO:0006351	166353209	chr6	166353150	-	hs|6q27	NR_026860	chr6:166353209-166353150	NR_026860	Hs.31917
A_23_P149858	-5.5681	-2.47718	5.5681	down	ELOVL fatty acid elongase 3	ELOVL3	FALSE	Homo sapiens ELOVL fatty acid elongase 3 (ELOVL3), mRNA [NM_152310]	83401	GO:0005515|GO:0005783|GO:0019367|GO:0035338|GO:0044281|GO:0005789|GO:0019432|GO:0034625|GO:0016021|GO:0034626|GO:0042761|GO:0016740|GO:0044255	103988929	chr10	103988870	+	hs|10q24.32	NM_152310	chr10:103988870-103988929	NM_152310	Hs.302130
A_32_P54553	-5.52806	-2.46677	5.52806	down	ubiquitin specific peptidase 41	USP41	FALSE	ubiquitin specific peptidase 41 [Source:HGNC Symbol;Acc:20070] [ENST00000454608]	373856	GO:0006511|GO:0008234	20723843	chr22	20723784	-	hs|22q11.21	XM_006726833	chr22:20723843-20723784	XM_006726833	Hs.38260
A_23_P139864	-5.5092	-2.46184	5.5092	down	germ cell associated 1	GSG1	FALSE	Homo sapiens germ cell associated 1 (GSG1), transcript variant 1, mRNA [NM_031289]	83445	GO:0005789|GO:0016021|GO:0070063	13237859	chr12	13237800	-	hs|12p13.1	NM_031289	chr12:13237859-13237800	NM_031289	Hs.240053
A_23_P255896	-5.48323	-2.45503	5.48323	down	TraB domain containing 2A	TRABD2A	FALSE	Homo sapiens TraB domain containing 2A (TRABD2A), transcript variant 2, mRNA [NM_001080824]	129293	GO:0017147|GO:0031301|GO:0005887|GO:0018158|GO:0008152|GO:0030178|GO:0006508|GO:0060322|GO:0016055|GO:0004222|GO:0046872	85097587	chr2	85097528	-	hs|2p11.2	NM_001080824	chr2:85097587-85097528	NM_001080824	Hs.469134
A_23_P115261	-5.47468	-2.45277	5.47468	down	angiotensinogen (serpin peptidase inhibitor, clade A, member 8)	AGT	FALSE	Homo sapiens angiotensinogen (serpin peptidase inhibitor, clade A, member 8) (AGT), mRNA [NM_000029]	183	GO:0005515|GO:0030308|GO:0001658|GO:0009651|GO:0009409|GO:0006883|GO:0001819|GO:0005615|GO:0001558|GO:0019229|GO:0030162|GO:0002019|GO:0002018|GO:0030198|GO:0002016|GO:0014061|GO:0010744|GO:0007568|GO:0002034|GO:0014068|GO:0001543|GO:0030432|GO:0010595|GO:0032270|GO:0007186|GO:0005179|GO:0001999|GO:0001998|GO:0008083|GO:0008285|GO:0002003|GO:0007263|GO:0004867|GO:0007199|GO:0007267|GO:0010873|GO:…	230838590	chr1	230838531	-	hs|1q42.2	NM_000029	chr1:230838590-230838531	NM_000029	Hs.19383
A_33_P3239087	-5.45245	-2.44691	5.45245	down	family with sequence similarity 87, member A	FAM87A	FALSE	Homo sapiens family with sequence similarity 87, member A (FAM87A), long non-coding RNA [NR_103537]	157693	GO:0016021	326013	chr8	325954	-	hs|8p23.3	NR_103537	chr8:326013-325954	NR_103537	Hs.591390
A_33_P3390823	-5.42466	-2.43953	5.42466	down			FALSE				208989	chr7	208930	+	hs|7p22.3		chr7:000208930-000208989
A_23_P114084	-5.4002	-2.43301	5.4002	down	phosphate regulating endopeptidase homolog, X-linked	PHEX	FALSE	Homo sapiens phosphate regulating endopeptidase homolog, X-linked (PHEX), transcript variant 1, mRNA [NM_000444]	5251	GO:0048471|GO:0005794|GO:0005886|GO:0005783|GO:0007267|GO:0030282|GO:0001501|GO:0005887|GO:0004177|GO:0006508|GO:0008270|GO:0019637|GO:0004222|GO:0006464	22266243	chrX	22266184	+	hs|Xp22.11	NM_000444	chrX:22266184-22266243	NM_000444	Hs.495834
A_33_P3243230	-5.3911	-2.43058	5.3911	down			FALSE	HSINTLK8M interleukin 8 {Homo sapiens} (exp=-1; wgp=0; cg=0), partial (97%) [THC2544321]			74608041	chr4	74607982	+	hs|4q13.3		chr4:074607982-074608041
A_23_P90925	-5.39048	-2.43041	5.39048	down	interleukin 36, beta	IL36B	FALSE	Homo sapiens interleukin 36, beta (IL36B), transcript variant 2, mRNA [NM_173178]	27177	GO:0032755|GO:0006955|GO:0005149|GO:0006954|GO:0005576|GO:0005615|GO:0005125|GO:0045582	113786581	chr2	113786522	-	hs|2q13	NM_173178	chr2:113786581-113786522	NM_173178	Hs.278909
A_19_P00803039	-5.38774	-2.42968	5.38774	down	uncharacterized LOC100130476	LOC100130476	FALSE	Homo sapiens uncharacterized LOC100130476 (LOC100130476), long non-coding RNA [NR_049793]	100130476		138145112	chr6	138145053	-	hs|6q23.3	NR_049793	chr6:138145112-138145053	NR_049793	Hs.598050
A_23_P121926	-5.38125	-2.42794	5.38125	down	selenoprotein P, plasma, 1	SEPP1	FALSE	Homo sapiens selenoprotein P, plasma, 1 (SEPP1), transcript variant 1, mRNA [NM_005410]	6414	GO:0019953|GO:0008430|GO:0001887|GO:0007420|GO:0007626|GO:0005576|GO:0009791|GO:0040007|GO:0006979|GO:0005615|GO:0070062	42799939	chr5	42799904	-	hs|5p12	NM_005410	chr5:42799939-42799904	NM_005410	Hs.275775
A_33_P3275878	-5.37291	-2.4257	5.37291	down	surfactant protein B	SFTPB	FALSE	Homo sapiens surfactant protein B (SFTPB), transcript variant 1, mRNA [NM_000542]	6439	GO:0006665|GO:0007585|GO:0009887|GO:0005764|GO:0005615	85886044	chr2	85885985	-	hs|2p11.2	NM_000542	chr2:85886044-85885985	NM_000542	Hs.512690
A_24_P370472	-5.34709	-2.41875	5.34709	down	major histocompatibility complex, class II, DR beta 4	HLA-DRB4	FALSE	Homo sapiens major histocompatibility complex, class II, DR beta 4 (HLA-DRB4), mRNA [NM_021983]	3126	GO:0005515|GO:0002437|GO:0050852|GO:0005886|GO:0002862|GO:0019221|GO:0031295|GO:0042088|GO:0005765|GO:0042130|GO:0019886|GO:0006955|GO:0002381|GO:0042605|GO:2001179|GO:0071556|GO:0032689|GO:0060333|GO:0030658|GO:0012507|GO:0051262|GO:0035774|GO:0002503|GO:0042613|GO:0032588|GO:0030666|GO:0007165|GO:0000139|GO:0005887|GO:0031902|GO:0032673|GO:0016045|GO:0030669|GO:0032395|GO:0009897|GO:0002455						NM_021983		NM_021983	Hs.696211
A_23_P118065	-5.32405	-2.41252	5.32405	down	hydroxysteroid (17-beta) dehydrogenase 2	HSD17B2	FALSE	Homo sapiens hydroxysteroid (17-beta) dehydrogenase 2 (HSD17B2), mRNA [NM_002153]	3294	GO:0006694|GO:0004303|GO:0047035|GO:0047006|GO:0005789|GO:0032526|GO:0016021|GO:0001890|GO:0001701|GO:0055114	82131956	chr16	82131897	+	hs|16q23.3	NM_002153	chr16:82131897-82131956	NM_002153	Hs.162795
A_23_P160159	-5.29628	-2.40498	5.29628	down	solute carrier family 2 (facilitated glucose/fructose transporter), member 5	SLC2A5	FALSE	Homo sapiens solute carrier family 2 (facilitated glucose/fructose transporter), member 5 (SLC2A5), transcript variant 1, mRNA [NM_003039]	6518	GO:0005886|GO:0005975|GO:0044281|GO:0055085|GO:0008645|GO:0015755|GO:0016324|GO:0015758|GO:0005353|GO:0016021|GO:0071332|GO:0005355|GO:0070062	9097229	chr1	9097170	-	hs|1p36.23	NM_003039	chr1:9097229-9097170	NM_003039	Hs.530003
A_23_P325690	-5.28799	-2.40272	5.28799	down	ankyrin repeat domain 35	ANKRD35	FALSE	Homo sapiens ankyrin repeat domain 35 (ANKRD35), transcript variant 1, mRNA [NM_144698]	148741		145568488	chr1	145568429	+	hs|1q21.1	NM_144698	chr1:145568429-145568488	NM_144698	Hs.710624
A_19_P00804586	-5.28335	-2.40145	5.28335	down	uncharacterized LOC101927764	LOC101927764	FALSE	PREDICTED: Homo sapiens uncharacterized LOC101927764 (LOC101927764), transcript variant X4, ncRNA [XR_425464]	101927764		120480842	chr2	120480783	-	hs|2q14.2	XR_425464	chr2:120480842-120480783	XR_425464
A_19_P00808767	-5.25799	-2.39451	5.25799	down			FALSE				88155886	chr3	88155827	-	hs|3p11.1		chr3:088155886-088155827
A_23_P301855	-5.2565	-2.3941	5.2565	down	limbic system-associated membrane protein	LSAMP	FALSE	Homo sapiens limbic system-associated membrane protein (LSAMP), mRNA [NM_002338]	4045	GO:0005515|GO:0005886|GO:0031225|GO:0007155|GO:0007399	115571342	chr3	115561379	-	hs|3q13.31	NM_002338	chr3:115571342-115561379	NM_002338	Hs.26409
A_23_P12082	-5.25137	-2.39269	5.25137	down	chitinase 3-like 2	CHI3L2	FALSE	Homo sapiens chitinase 3-like 2 (CHI3L2), transcript variant 3, mRNA [NM_001025199]	1117	GO:0008061|GO:0006032|GO:0005975|GO:0005615|GO:0004568	111784882	chr1	111784040	+	hs|1p13.3	NM_001025199	chr1:111784040-111784882	NM_001025199	Hs.514840
A_24_P64653	-5.2209	-2.3843	5.2209	down	methyltransferase like 7B	METTL7B	FALSE	Homo sapiens methyltransferase like 7B (METTL7B), mRNA [NM_152637]	196410	GO:0008168|GO:0032259	56077696	chr12	56077637	+	hs|12q13.2	NM_152637	chr12:56077637-56077696	NM_152637	Hs.51483
A_32_P10133	-5.15449	-2.36583	5.15449	down	psoriasis associated non-protein coding RNA induced by stress	PRINS	FALSE	Homo sapiens cDNA FLJ11983 fis, clone HEMBB1001337. [AK022045]	100169750		24544916	chr10	24544857	+	hs|10p12.2	AK022045	chr10:24544857-24544916		Hs.731140
A_24_P12690	-5.15297	-2.3654	5.15297	down	indoleamine 2,3-dioxygenase 2	IDO2	FALSE	Homo sapiens indoleamine 2,3-dioxygenase 2 (IDO2), mRNA [NM_194294]	169355	GO:0034641|GO:0006569|GO:0005737|GO:0004833|GO:0019441|GO:0033754|GO:0044281|GO:0046872|GO:0055114|GO:0020037|GO:0005829	39873751	chr8	39873692	+	hs|8p11.21	NM_194294	chr8:39873692-39873751	NM_194294	Hs.676257
A_33_P3262789	-5.14165	-2.36223	5.14165	down	receptor accessory protein 6	REEP6	FALSE	Homo sapiens receptor accessory protein 6 (REEP6), mRNA [NM_138393]	92840	GO:0008150|GO:0003674|GO:0005634|GO:0016021	1497921	chr19	1497862	+	hs|19p13.3	NM_138393	chr19:1497862-1497921	NM_138393	Hs.76277
A_23_P127495	-5.13324	-2.35987	5.13324	down	butyrobetaine (gamma), 2-oxoglutarate dioxygenase (gamma-butyrobetaine hydroxylase) 1	BBOX1	FALSE	Homo sapiens butyrobetaine (gamma), 2-oxoglutarate dioxygenase (gamma-butyrobetaine hydroxylase) 1 (BBOX1), mRNA [NM_003986]	8424	GO:0005739|GO:0034641|GO:0008336|GO:0005506|GO:0045329|GO:0008270|GO:0044281|GO:0070062|GO:0055114|GO:0005829	27149015	chr11	27148956	+	hs|11p14.2	NM_003986	chr11:27148956-27149015	NM_003986	Hs.591996
A_33_P3391603	-5.12395	-2.35726	5.12395	down	laminin, alpha 4	LAMA4	FALSE	Homo sapiens laminin, alpha 4 (LAMA4), transcript variant 5, mRNA [NM_001105209]	3910	GO:0030334|GO:0001568|GO:0005102|GO:0005605|GO:0005606|GO:0005576|GO:0030155|GO:0005604|GO:0031012|GO:0045995|GO:0050873|GO:0030198|GO:0007155|GO:0070062|GO:0005201	112575046	chr6	112574987	-	hs|6q21	NM_001105209	chr6:112575046-112574987	NM_001105209	Hs.654572
A_23_P64161	-5.10992	-2.3533	5.10992	down	angiopoietin-like 5	ANGPTL5	FALSE	Homo sapiens angiopoietin-like 5 (ANGPTL5), mRNA [NM_178127]	253935	GO:0005576	101762163	chr11	101762104	-	hs|11q22.1	NM_178127	chr11:101762163-101762104	NM_178127	Hs.318370
A_23_P8981	-5.10296	-2.35133	5.10296	down	steroidogenic acute regulatory protein	STAR	FALSE	Homo sapiens steroidogenic acute regulatory protein (STAR), mRNA [NM_000349]	6770	GO:0042542|GO:0006694|GO:0043627|GO:0006701|GO:0018963|GO:0017143|GO:0006699|GO:0006703|GO:0071560|GO:0005758|GO:0042747|GO:0043524|GO:0048168|GO:0060992|GO:0043025|GO:0018958|GO:0030061|GO:0010288|GO:0051412|GO:0032869|GO:0071312|GO:0009635|GO:0044321|GO:0061370|GO:0071872|GO:0071346|GO:0007420|GO:0006700|GO:0016101|GO:0032367|GO:0043005|GO:0035457|GO:0045471|GO:0017127|GO:0018879|GO:0050810|GO:…	38001237	chr8	38001178	-	hs|8p11.23	NM_000349	chr8:38001237-38001178	NM_000349	Hs.521535
A_33_P3268910	-5.09866	-2.35012	5.09866	down	sprouty homolog 1, antagonist of FGF signaling (Drosophila)	SPRY1	FALSE	Homo sapiens sprouty homolog 1, antagonist of FGF signaling (Drosophila) (SPRY1), transcript variant 1, mRNA [NM_001258038]	10252	GO:0001656|GO:0005515|GO:0001657|GO:0008285|GO:0005886|GO:0042059|GO:0001759|GO:0051387|GO:0005829|GO:0046580|GO:0007173|GO:0043407|GO:0040037|GO:0070373|GO:0034261	124318977	chr4	124318918	+	hs|4q28.1	NM_001258038	chr4:124318918-124318977	NM_001258038	Hs.744854
A_23_P6263	-5.09361	-2.34869	5.09361	down	myxovirus (influenza virus) resistance 2 (mouse)	MX2	FALSE	Homo sapiens myxovirus (influenza virus) resistance 2 (mouse) (MX2), mRNA [NM_002463]	4600	GO:0019221|GO:0035455|GO:0003924|GO:0005634|GO:0006952|GO:0005525|GO:0009615|GO:0015031|GO:0005829|GO:0006184|GO:0051607|GO:0005737|GO:0060337|GO:0005643|GO:0051726|GO:0051028|GO:0046822	42780560	chr21	42780501	+	hs|21q22.3	NM_002463	chr21:42780501-42780560	NM_002463	Hs.926
A_23_P312132	-5.08001	-2.34483	5.08001	down	integrin, alpha X (complement component 3 receptor 4 subunit)	ITGAX	FALSE	Homo sapiens integrin, alpha X (complement component 3 receptor 4 subunit) (ITGAX), transcript variant 2, mRNA [NM_000887]	3687	GO:0005515|GO:0008305|GO:0005886|GO:0050900|GO:0046872|GO:0051607|GO:0007229|GO:0007596|GO:0030198|GO:0009887|GO:0004872|GO:0007155|GO:0009897	31394010	chr16	31393951	+	hs|16p11.2	NM_000887	chr16:31393951-31394010	NM_000887	Hs.248472
A_33_P3403474	-5.04307	-2.3343	5.04307	down	TMPRSS11B N-terminal like, pseudogene	TMPRSS11BNL	FALSE	Homo sapiens TMPRSS11B N-terminal like, pseudogene (TMPRSS11BNL), non-coding RNA [NR_104048]	401136	GO:0016021	69054301	chr4	69054242	-	hs|4q13.2	NR_104048	chr4:69054301-69054242	NR_104048	Hs.652046
A_33_P3235721	-5.04275	-2.33421	5.04275	down	chromosome 11 open reading frame 87	C11orf87	FALSE	Homo sapiens chromosome 11 open reading frame 87 (C11orf87), mRNA [NM_207645]	399947	GO:0016021	109296305	chr11	109296246	+	hs|11q22.3	NM_207645	chr11:109296246-109296305	NM_207645	Hs.172982
A_23_P104438	-5.01556	-2.32641	5.01556	down	myopalladin	MYPN	FALSE	Homo sapiens myopalladin (MYPN), transcript variant 1, mRNA [NM_032578]	84665	GO:0008092|GO:0005515|GO:0051371|GO:0030018|GO:0017124|GO:0045214|GO:0005634|GO:0003779|GO:0031674	69971052	chr10	69970993	+	hs|10q21.3	NM_032578	chr10:69970993-69971052	NM_032578	Hs.55205
A_33_P3424222	-4.98197	-2.31672	4.98197	down	major histocompatibility complex, class II, DQ beta 1	HLA-DQB1	FALSE	Homo sapiens major histocompatibility complex, class II, DQ beta 1 (HLA-DQB1), transcript variant 1, mRNA [NM_002123]	3119	GO:0050852|GO:0012507|GO:0005886|GO:0031295|GO:0019221|GO:0042613|GO:0005765|GO:0032588|GO:0030666|GO:0019886|GO:0006955|GO:0000139|GO:0016020|GO:0002381|GO:0042605|GO:0071556|GO:0032395|GO:0030669|GO:0010008|GO:0060333|GO:0002455|GO:0030658	32629184	chr6	32629125	-	hs|6p21.32	NM_002123	chr6:32629184-32629125	NM_002123	Hs.409934
A_19_P00812697	-4.97345	-2.31425	4.97345	down			FALSE				66204406	chr12	66204347	-	hs|12q14.3		chr12:066204406-066204347
A_23_P431268	-4.93764	-2.30382	4.93764	down	pleckstrin homology domain containing, family A member 6	PLEKHA6	FALSE	Homo sapiens pleckstrin homology domain containing, family A member 6 (PLEKHA6), mRNA [NM_014935]	22874		204188069	chr1	204188010	-	hs|1q32.1	NM_014935	chr1:204188069-204188010	NM_014935	Hs.253146
A_24_P237778	-4.93167	-2.30208	4.93167	down	mannosidase, alpha, class 1C, member 1	MAN1C1	FALSE	Homo sapiens mannosidase, alpha, class 1C, member 1 (MAN1C1), transcript variant 1, mRNA [NM_020379]	57134	GO:0030173|GO:0000139|GO:0005509|GO:0004571|GO:0006487|GO:0044267|GO:0043687|GO:0018279	26098263	chr1	26098204	+	hs|1p36.11	NM_020379	chr1:26098204-26098263	NM_020379	Hs.197043
A_19_P00807643	-4.92537	-2.30023	4.92537	down	CYP1B1 antisense RNA 1	CYP1B1-AS1	FALSE	Homo sapiens CYP1B1 antisense RNA 1 (CYP1B1-AS1), long non-coding RNA [NR_027252]	285154		38408946	chr2	38408887	+	hs|2p22.2	NR_027252	chr2:38408887-38408946	NR_027252	Hs.353894
A_23_P422851	-4.89511	-2.29134	4.89511	down	Cdk5 and Abl enzyme substrate 1	CABLES1	FALSE	Homo sapiens Cdk5 and Abl enzyme substrate 1 (CABLES1), transcript variant 1, mRNA [NM_138375]	91768	GO:0045859|GO:0005515|GO:0007049|GO:0007596|GO:0051726|GO:0016538|GO:0005634|GO:0051302|GO:0051301|GO:0007399|GO:0005829	20838601	chr18	20838542	+	hs|18q11.2	NM_138375	chr18:20838542-20838601	NM_138375	Hs.11108
A_23_P217269	-4.89356	-2.29089	4.89356	down	V-set and immunoglobulin domain containing 4	VSIG4	FALSE	Homo sapiens V-set and immunoglobulin domain containing 4 (VSIG4), transcript variant 1, mRNA [NM_007268]	11326	GO:0032703|GO:0006957|GO:0005515|GO:0016021|GO:0070062|GO:0042130	65241745	chrX	65241686	-	hs|Xq12	NM_007268	chrX:65241745-65241686	NM_007268	Hs.8904
A_23_P55477	-4.87691	-2.28597	4.87691	down	adenosine A2b receptor	ADORA2B	FALSE	Homo sapiens adenosine A2b receptor (ADORA2B), mRNA [NM_000676]	136	GO:0032755|GO:0007588|GO:0005886|GO:0007254|GO:0032722|GO:0010575|GO:0060087|GO:0043306|GO:0000187|GO:0001609|GO:0007190|GO:0006968|GO:0001973|GO:0007186|GO:0005887|GO:0031668|GO:0031284|GO:0030828|GO:0007189|GO:0002882	15878910	chr17	15878851	+	hs|17p12	NM_000676	chr17:15878851-15878910	NM_000676	Hs.167046
A_33_P3414017	-4.87673	-2.28591	4.87673	down			FALSE				2299301	chr7	2299242	+	hs|7p22.3		chr7:002299242-002299301
A_33_P3227676	-4.86968	-2.28383	4.86968	down	chromosome 2 open reading frame 72	C2orf72	FALSE	Homo sapiens chromosome 2 open reading frame 72 (C2orf72), mRNA [NM_001144994]	257407		231914414	chr2	231914355	+	hs|2q37.1	NM_001144994	chr2:231914355-231914414	NM_001144994	Hs.526596
A_32_P143000	-4.83647	-2.27396	4.83647	down	family with sequence similarity 189, member A1	FAM189A1	FALSE	Homo sapiens family with sequence similarity 189, member A1 (FAM189A1), mRNA [NM_015307]	23359	GO:0016021	29412755	chr15	29412696	-	hs|15q13.1	NM_015307	chr15:29412755-29412696	NM_015307	Hs.383564
A_33_P3254579	-4.81243	-2.26677	4.81243	down	keratin associated protein 1-5	KRTAP1-5	FALSE	Homo sapiens keratin associated protein 1-5 (KRTAP1-5), mRNA [NM_031957]	83895	GO:0008150|GO:0003674|GO:0005575|GO:0045095	39183286	chr17	39183227	-	hs|17q21.2	NM_031957	chr17:39183286-39183227	NM_031957	Hs.534499
A_23_P10182	-4.80063	-2.26322	4.80063	down	acyl-CoA oxidase 2, branched chain	ACOX2	FALSE	Homo sapiens acyl-CoA oxidase 2, branched chain (ACOX2), mRNA [NM_003500]	8309	GO:0016402|GO:0005782|GO:0006699|GO:0033791|GO:0050660|GO:0005102|GO:0044281|GO:0003997|GO:0003995|GO:0008206|GO:0033540|GO:0044255|GO:0005777	58490967	chr3	58490908	-	hs|3p14.3	NM_003500	chr3:58490967-58490908	NM_003500	Hs.444959
A_23_P118842	-4.79753	-2.26229	4.79753	down	keratin associated protein 1-5	KRTAP1-5	FALSE	Homo sapiens keratin associated protein 1-5 (KRTAP1-5), mRNA [NM_031957]	83895	GO:0008150|GO:0003674|GO:0005575|GO:0045095	39182367	chr17	39182308	-	hs|17q21.2	NM_031957	chr17:39182367-39182308	NM_031957	Hs.534499
A_23_P256107	-4.79005	-2.26004	4.79005	down	heparanase	HPSE	FALSE	Homo sapiens heparanase (HPSE), transcript variant 1, mRNA [NM_006665]	10855	GO:0005515|GO:0051897|GO:0030305|GO:0005634|GO:0044281|GO:0005765|GO:0005764|GO:0043231|GO:0061042|GO:0030200|GO:0046983|GO:0033690|GO:0030203|GO:0043202|GO:0004566|GO:0005975|GO:0005730|GO:0006027|GO:0005576|GO:0006029|GO:0010575|GO:0051798|GO:0007160|GO:0030194|GO:0045121|GO:0045545|GO:0051797	84227383	chr4	84223390	-	hs|4q21.23	NM_006665	chr4:84227383-84223390	NM_006665	Hs.44227
A_23_P113393	-4.78727	-2.2592	4.78727	down	apelin	APLN	FALSE	Homo sapiens apelin (APLN), mRNA [NM_017413]	8862	GO:0048471|GO:0008284|GO:0005102|GO:0005576|GO:0045776|GO:0005615|GO:0031704|GO:0007165|GO:0043576|GO:0006955|GO:0005179|GO:0007595|GO:0045906|GO:0002026|GO:0042756|GO:0045909|GO:0051461|GO:0031652|GO:0051466|GO:0042327	128779470	chrX	128779411	-	hs|Xq26.1	NM_017413	chrX:128779470-128779411	NM_017413	Hs.303084
A_33_P3231262	-4.78229	-2.2577	4.78229	down	uncharacterized LOC257396	LOC257396	FALSE	Homo sapiens uncharacterized LOC257396 (LOC257396), transcript variant 1, long non-coding RNA [NR_034107]	257396		52410116	chr5	52410057	+	hs|5q11.2	NR_034107	chr5:52410057-52410116	NR_034107	Hs.12326
A_23_P69810	-4.72985	-2.24179	4.72985	down	1-acylglycerol-3-phosphate O-acyltransferase 9	AGPAT9	FALSE	Homo sapiens 1-acylglycerol-3-phosphate O-acyltransferase 9 (AGPAT9), transcript variant 1, mRNA [NM_032717]	84803	GO:0032006|GO:0005783|GO:0004366|GO:0044281|GO:0003841|GO:0005789|GO:0016024|GO:0019432|GO:0016021|GO:0006644|GO:0006654|GO:0044255|GO:0046474	84526643	chr4	84526584	+	hs|4q21.23	NM_032717	chr4:84526584-84526643	NM_032717	Hs.99196
A_23_P250122	-4.71748	-2.23802	4.71748	down	family with sequence similarity 20, member C	FAM20C	FALSE	Homo sapiens family with sequence similarity 20, member C (FAM20C), mRNA [NM_020223]	56975	GO:0005794|GO:0030501|GO:0005509|GO:0070166|GO:0005615|GO:0045669|GO:0001501|GO:0097187|GO:0040036|GO:0004674|GO:0071895|GO:0006468|GO:0051174|GO:0036179|GO:0070062	300440	chr7	300381	+	hs|7p22.3	NM_020223	chr7:300381-300440	NM_020223	Hs.134742
A_23_P211212	-4.71411	-2.23699	4.71411	down	collagen, type XVIII, alpha 1	COL18A1	FALSE	Homo sapiens collagen, type XVIII, alpha 1 (COL18A1), transcript variant 1, mRNA [NM_030582]	80781	GO:0005515|GO:0008284|GO:0005581|GO:0008285|GO:0005615|GO:0046872|GO:0042802|GO:0022617|GO:0030198|GO:0030574|GO:0009887|GO:0007155|GO:0070062|GO:0030335|GO:0042493|GO:0005576|GO:0001525|GO:0005604|GO:0031012|GO:0005198|GO:0001886|GO:0051599|GO:0005788|GO:0007601|GO:2000353	46933617	chr21	46933558	+	hs|21q22.3	NM_030582	chr21:46933558-46933617	NM_030582	Hs.517356
A_23_P9869	-4.71286	-2.2366	4.71286	down	carnosine dipeptidase 1 (metallopeptidase M20 family)	CNDP1	FALSE	Homo sapiens carnosine dipeptidase 1 (metallopeptidase M20 family) (CNDP1), mRNA [NM_032649]	84735	GO:0034701|GO:0006508|GO:0004180|GO:0005576|GO:0016805|GO:0046872|GO:0008237	72252197	chr18	72252138	+	hs|18q22.3	NM_032649	chr18:72252138-72252197	NM_032649	Hs.400613
A_23_P421054	-4.69518	-2.23118	4.69518	down	chromosome 6 open reading frame 165	C6orf165	FALSE	Homo sapiens chromosome 6 open reading frame 165 (C6orf165), mRNA [NM_001031743]	154313		88140867	chr6	88140808	+	hs|6q15	NM_001031743	chr6:88140808-88140867	NM_001031743	Hs.82921
A_33_P3301940	-4.63921	-2.21388	4.63921	down	phosphodiesterase 7B	PDE7B	FALSE	Homo sapiens phosphodiesterase 7B (PDE7B), mRNA [NM_018945]	27115	GO:0007165|GO:0004115|GO:0007268|GO:0046872|GO:0006198|GO:0005829	136516694	chr6	136516635	+	hs|6q23.3	NM_018945	chr6:136516635-136516694	NM_018945	Hs.744230
A_19_P00804611	-4.6349	-2.21254	4.6349	down			FALSE				170410521	chr3	170410462	-	hs|3q26.2		chr3:170410521-170410462
A_23_P24948	-4.63234	-2.21174	4.63234	down	potassium voltage-gated channel, Isk-related family, member 3	KCNE3	FALSE	Homo sapiens potassium voltage-gated channel, Isk-related family, member 3 (KCNE3), mRNA [NM_005472]	10008	GO:0005249|GO:0015459|GO:0034765|GO:0043266|GO:0016021|GO:0071805	74166545	chr11	74166486	-	hs|11q13.4	NM_005472	chr11:74166545-74166486	NM_005472	Hs.523899
A_23_P64873	-4.62742	-2.21021	4.62742	down	decorin	DCN	FALSE	Homo sapiens decorin (DCN), transcript variant A1, mRNA [NM_001920]	1634	GO:0019800|GO:0005518|GO:0005589|GO:0044281|GO:0005539|GO:0005615|GO:0030208|GO:0030207|GO:0030206|GO:0022617|GO:0030198|GO:0032496|GO:0009887|GO:0030204|GO:0030203|GO:0043202|GO:0005975|GO:0005796|GO:0001822|GO:0007568|GO:0050840|GO:0005578|GO:0005576|GO:0001890|GO:0009612|GO:0031012|GO:0047485|GO:0007519|GO:0042060	91539893	chr12	91539834	-	hs|12q21.33	NM_001920	chr12:91539893-91539834	NM_001920	Hs.156316
A_33_P3323945	-4.61557	-2.20651	4.61557	down	cell cycle exit and neuronal differentiation 1	CEND1	FALSE	Homo sapiens cell cycle exit and neuronal differentiation 1 (CEND1), mRNA [NM_016564]	51286	GO:0021933|GO:0021702|GO:0021686|GO:0021941|GO:0007628|GO:0016021	787170	chr11	787111	-	hs|11p15.5	NM_016564	chr11:787170-787111	NM_016564	Hs.22140
A_23_P422732	-4.60987	-2.20473	4.60987	down	WD repeat domain 63	WDR63	FALSE	Homo sapiens WD repeat domain 63 (WDR63), transcript variant 1, mRNA [NM_145172]	126820		85598720	chr1	85598661	+	hs|1p22.3	NM_145172	chr1:85598661-85598720	NM_145172	Hs.97933
A_23_P7212	-4.58295	-2.19628	4.58295	down	complement factor I	CFI	FALSE	Homo sapiens complement factor I (CFI), mRNA [NM_000204]	3426	GO:0030449|GO:0016020|GO:0004252|GO:0045087|GO:0006958|GO:0006508|GO:0005576|GO:0005615|GO:0046872|GO:0006898|GO:0070062|GO:0005044	110662123	chr4	110662064	-	hs|4q25	NM_000204	chr4:110662123-110662064	NM_000204	Hs.312485
A_24_P106624	-4.56378	-2.19023	4.56378	down	mesenchyme homeobox 2	MEOX2	FALSE	Homo sapiens mesenchyme homeobox 2 (MEOX2), mRNA [NM_005924]	4223	GO:0005515|GO:0001757|GO:0008015|GO:0001205|GO:0007275|GO:0001525|GO:0000978|GO:0043565|GO:0001077|GO:0005737|GO:0016607|GO:0007519|GO:0070997|GO:0045944|GO:0060021|GO:0060173|GO:0000980	15651278	chr7	15651219	-	hs|7p21.2	NM_005924	chr7:15651278-15651219	NM_005924	Hs.170355
A_19_P00811717	-4.53234	-2.18026	4.53234	down	cadherin-related family member 3	CDHR3	FALSE	cadherin-related family member 3 [Source:HGNC Symbol;Acc:26308] [ENST00000488386]	222256	GO:0005886|GO:0005509|GO:0016021|GO:0007156	105517703	chr7	105517644	+	hs|7q22.3	XM_005250224	chr7:105517644-105517703	XM_005250224	Hs.150120
A_23_P142424	-4.52594	-2.17822	4.52594	down	IGF-like family receptor 1	IGFLR1	FALSE	Homo sapiens IGF-like family receptor 1 (IGFLR1), mRNA [NM_024660]	79713	GO:0005515|GO:0005886|GO:0016021	36230233	chr19	36230174	-	hs|19q13.12	NM_024660	chr19:36230233-36230174	NM_024660	Hs.352548
A_24_P4170	-4.50915	-2.17286	4.50915	down	carboxypeptidase A6	CPA6	FALSE	Homo sapiens carboxypeptidase A6 (CPA6), mRNA [NM_020361]	57094	GO:0006508|GO:0005578|GO:0008270|GO:0004181	68396957	chr8	68396078	-	hs|8q13.2	NM_020361	chr8:68396957-68396078	NM_020361	Hs.658850
A_23_P72737	-4.49988	-2.16989	4.49988	down	interferon induced transmembrane protein 1	IFITM1	FALSE	Homo sapiens interferon induced transmembrane protein 1 (IFITM1), mRNA [NM_003641]	8519	GO:0005515|GO:0030336|GO:0008285|GO:0005886|GO:0035456|GO:0019221|GO:0035455|GO:0009615|GO:0045669|GO:0035556|GO:0051607|GO:0060337|GO:0001503|GO:0046597|GO:0050776|GO:0005057|GO:0016021|GO:0034341|GO:0007166|GO:0045071	315268	chr11	315209	+	hs|11p15.5	NM_003641	chr11:315209-315268	NM_003641	Hs.458414
A_24_P158946	-4.49237	-2.16748	4.49237	down	FYVE, RhoGEF and PH domain containing 4	FGD4	FALSE	Homo sapiens FYVE, RhoGEF and PH domain containing 4 (FGD4), mRNA [NM_139241]	121512	GO:0051056|GO:0048011|GO:0043065|GO:0030036|GO:0005794|GO:0031267|GO:0030035|GO:0007264|GO:0008360|GO:0030032|GO:0003779|GO:0030175|GO:0015629|GO:0097190|GO:0001726|GO:0046872|GO:0030027|GO:0043088|GO:0005829|GO:0005085|GO:0005737|GO:0007010|GO:0046847|GO:0005089	32786552	chr12	32786493	+	hs|12p11.21	NM_139241	chr12:32786493-32786552	NM_139241	Hs.117835
A_23_P17663	-4.49076	-2.16696	4.49076	down	myxovirus (influenza virus) resistance 1, interferon-inducible protein p78 (mouse)	MX1	FALSE	Homo sapiens myxovirus (influenza virus) resistance 1, interferon-inducible protein p78 (mouse) (MX1), transcript variant 2, mRNA [NM_002462]	4599	GO:0005515|GO:0048471|GO:0019221|GO:0003924|GO:0006915|GO:0005634|GO:0006952|GO:0005525|GO:0009615|GO:0005829|GO:0006184|GO:0007165|GO:0051607|GO:0005737|GO:0060337|GO:0045087|GO:0005789|GO:0034340|GO:0045071	42831073	chr21	42831014	+	hs|21q22.3	NM_002462	chr21:42831014-42831073	NM_002462	Hs.517307
A_33_P3400763	-4.48114	-2.16387	4.48114	down	perilipin 4	PLIN4	FALSE	Homo sapiens perilipin 4 (PLIN4), mRNA [NM_001080400]	729359	GO:0005811|GO:0005737|GO:0005886	4502266	chr19	4502207	-	hs|19p13.3	NM_001080400	chr19:4502266-4502207	NM_001080400	Hs.591387
A_33_P3382856	-4.46666	-2.1592	4.46666	down	decorin	DCN	FALSE	Homo sapiens decorin (DCN), transcript variant E, mRNA [NM_133507]	1634	GO:0019800|GO:0005518|GO:0005589|GO:0044281|GO:0005539|GO:0005615|GO:0030208|GO:0030207|GO:0030206|GO:0022617|GO:0030198|GO:0032496|GO:0009887|GO:0030204|GO:0030203|GO:0043202|GO:0005975|GO:0005796|GO:0001822|GO:0007568|GO:0050840|GO:0005578|GO:0005576|GO:0001890|GO:0009612|GO:0031012|GO:0047485|GO:0007519|GO:0042060	91572259	chr12	91572200	-	hs|12q21.33	NM_133507	chr12:91572259-91572200	NM_133507	Hs.156316
A_23_P53198	-4.45601	-2.15575	4.45601	down	diacylglycerol O-acyltransferase 2	DGAT2	FALSE	Homo sapiens diacylglycerol O-acyltransferase 2 (DGAT2), transcript variant 1, mRNA [NM_032564]	84649	GO:0048471|GO:0019915|GO:0005783|GO:0003846|GO:0030176|GO:0035356|GO:0044281|GO:0006071|GO:0035336|GO:0042803|GO:0005739|GO:0034383|GO:0042572|GO:0019432|GO:0004144|GO:0044255|GO:0005811|GO:0042632|GO:0055089|GO:0050252|GO:0071400|GO:0005789|GO:0060613|GO:0036155|GO:0016021|GO:0006644|GO:0097006|GO:0046339|GO:0046474	75511902	chr11	75511843	+	hs|11q13.5	NM_032564	chr11:75511843-75511902	NM_032564	Hs.129798
A_33_P3686706	-4.45117	-2.15418	4.45117	down			FALSE	Q73KV7_TREDE (Q73KV7) Orotidine 5'-phosphate decarboxylase , partial (6%) [THC2638457]			107217851	chr14	107217792	-	hs|14q32.33		chr14:107217851-107217792
A_19_P00332241	-4.44453	-2.15203	4.44453	down	DGUOK antisense RNA 1	DGUOK-AS1	FALSE	Homo sapiens DGUOK antisense RNA 1 (DGUOK-AS1), transcript variant 1, long non-coding RNA [NR_104029]	100874048		74208305	chr2	74208246	-	hs|2p13.1	NR_104029	chr2:74208305-74208246	NR_104029
A_24_P926507	-4.43942	-2.15037	4.43942	down	solute carrier family 14 (urea transporter), member 1 (Kidd blood group)	SLC14A1	FALSE	Homo sapiens solute carrier family 14 (urea transporter), member 1 (Kidd blood group) (SLC14A1), transcript variant 4, mRNA [NM_001146037]	6563	GO:0016323|GO:0005886|GO:0005887|GO:0005372|GO:0015265|GO:0015204|GO:0006833|GO:0071918|GO:0055085|GO:0015840	43331985	chr18	43331926	+	hs|18q12.3	NM_001146037	chr18:43331926-43331985	NM_001146037	Hs.101307
A_24_P97825	-4.4312	-2.1477	4.4312	down	coiled-coil domain containing 69	CCDC69	FALSE	Homo sapiens coiled-coil domain containing 69 (CCDC69), mRNA [NM_015621]	26112		150561538	chr5	150561479	-	hs|5q33.1	NM_015621	chr5:150561538-150561479	NM_015621	Hs.655336
A_33_P3383912	-4.43107	-2.14765	4.43107	down	major histocompatibility complex, class II, DR beta 3	HLA-DRB3	FALSE	Homo sapiens major histocompatibility complex, class II, DR beta 3 (HLA-DRB3), mRNA [NM_022555]	3125	GO:0005515|GO:0002437|GO:0050852|GO:0005886|GO:0019221|GO:0031295|GO:0042088|GO:0005765|GO:0042130|GO:0019886|GO:0006955|GO:0002381|GO:0042605|GO:2001179|GO:0071556|GO:0032689|GO:0060333|GO:0030658|GO:0012507|GO:0051262|GO:0035774|GO:0042613|GO:0032588|GO:0030666|GO:0007165|GO:0016020|GO:0000139|GO:0005887|GO:0031902|GO:0032673|GO:0016045|GO:0030669|GO:0032395|GO:0009897|GO:0002455						NM_022555		NM_022555	Hs.696211
A_33_P3243175	-4.42018	-2.1441	4.42018	down	pyridoxamine 5'-phosphate oxidase	PNPO	FALSE	Homo sapiens pyridoxamine 5'-phosphate oxidase (PNPO), mRNA [NM_018129]	55163	GO:0042823|GO:0006766|GO:0010181|GO:0042816|GO:0006767|GO:0044281|GO:0004733|GO:0008615|GO:0070062|GO:0055114|GO:0005829	46026673	chr17	46026614	+	hs|17q21.32	NM_018129	chr17:46026614-46026673	NM_018129	Hs.631742
A_33_P3319815	-4.41495	-2.1424	4.41495	down	chromosome X open reading frame 28	CXorf28	FALSE	Homo sapiens chromosome X open reading frame 28 (CXorf28), long non-coding RNA [NR_038428]	100129464		3202644	chrX	3202585	+	hs|Xp22.33	NR_038428	chrX:3202585-3202644	NR_038428	Hs.187816
A_23_P63158	-4.40305	-2.1385	4.40305	down	spectrin, alpha, erythrocytic 1 (elliptocytosis 2)	SPTA1	FALSE	Homo sapiens spectrin, alpha, erythrocytic 1 (elliptocytosis 2) (SPTA1), mRNA [NM_003126]	6708	GO:0030097|GO:0005515|GO:0007009|GO:0008091|GO:0046982|GO:0008360|GO:0005509|GO:0031235|GO:0032437|GO:0014731|GO:0015629|GO:0051693|GO:0032092|GO:0005829|GO:0051015|GO:0006779|GO:0007411|GO:0042102|GO:0005200|GO:0007015|GO:0002260	158580696	chr1	158580637	-	hs|1q23.1	NM_003126	chr1:158580696-158580637	NM_003126	Hs.119825
A_24_P67534	-4.38821	-2.13363	4.38821	down	small integral membrane protein 10	SMIM10	FALSE	Homo sapiens small integral membrane protein 10 (SMIM10), mRNA [NM_001163438]	644538	GO:0005886|GO:0016021	134125403	chrX	134125344	+	hs|Xq26.3	NM_001163438	chrX:134125344-134125403	NM_001163438	Hs.42239
A_33_P3275707	-4.3881	-2.1336	4.3881	down	adaptor-related protein complex 1, sigma 3 subunit	AP1S3	FALSE	Homo sapiens adaptor-related protein complex 1, sigma 3 subunit (AP1S3), transcript variant 1, mRNA [NM_001039569]	130340	GO:0006892|GO:0005765|GO:0006886|GO:0032588|GO:0030117|GO:0005829|GO:0050690|GO:0019886|GO:0005905|GO:0000139|GO:0008565|GO:0061024|GO:0016032|GO:0030659	224620198	chr2	224620139	-	hs|2q36.1	NM_001039569	chr2:224620198-224620139	NM_001039569	Hs.632555
A_24_P13024	-4.38576	-2.13283	4.38576	down	solute carrier family 16, member 12	SLC16A12	FALSE	Homo sapiens solute carrier family 16, member 12 (SLC16A12), mRNA [NM_213606]	387700	GO:0005886|GO:0016021|GO:0055085|GO:0015293	91190274	chr10	91190215	-	hs|10q23.31	NM_213606	chr10:91190274-91190215	NM_213606	Hs.530338
A_33_P3298861	-4.37423	-2.12903	4.37423	down	solute carrier family 12, member 8	SLC12A8	FALSE	Homo sapiens solute carrier family 12, member 8 (SLC12A8), transcript variant 1, mRNA [NM_024628]	84561	GO:0016021|GO:0055085|GO:0006813|GO:0015293	124802842	chr3	124802783	-	hs|3q21.2	NM_024628	chr3:124802842-124802783	NM_024628	Hs.658514
A_33_P3261695	-4.37231	-2.12839	4.37231	down	testis expressed 22	TEX22	FALSE	Homo sapiens testis expressed 22 (TEX22), mRNA [NM_001195082]	647310	GO:0001669	105865699	chr14	105865640	+	hs|14q32.33	NM_001195082	chr14:105865640-105865699	NM_001195082	Hs.729499
A_23_P71379	-4.37172	-2.1282	4.37172	down	prostate stem cell antigen	PSCA	FALSE	Homo sapiens prostate stem cell antigen (PSCA), transcript variant 1, mRNA [NM_005672]	8000	GO:0005886|GO:0031225|GO:0070062	143764035	chr8	143763976	+	hs|8q24.3	NM_005672	chr8:143763976-143764035	NM_005672	Hs.652235
A_19_P00327974	-4.35928	-2.12409	4.35928	down			FALSE				66185835	chr12	66185776	-	hs|12q14.3		chr12:066185835-066185776
A_23_P142075	-4.31671	-2.10993	4.31671	down	acid phosphatase 5, tartrate resistant	ACP5	FALSE	Homo sapiens acid phosphatase 5, tartrate resistant (ACP5), transcript variant 4, mRNA [NM_001611]	54	GO:0050830|GO:0045453|GO:0003993|GO:0032691|GO:0032929|GO:0032720|GO:0006767|GO:0044281|GO:0005764|GO:0008198|GO:0005829|GO:0008199|GO:0006771|GO:0045019|GO:0006766|GO:0032695|GO:0060349|GO:0050728|GO:0016311|GO:0032496|GO:0016021|GO:0034097|GO:0070062	11685584	chr19	11685525	-	hs|19p13.2	NM_001611	chr19:11685584-11685525	NM_001611	Hs.1211
A_33_P3358745	-4.31497	-2.10935	4.31497	down	selenoprotein P, plasma, 1	SEPP1	FALSE	Homo sapiens selenoprotein P, plasma, 1 (SEPP1), transcript variant 3, mRNA [NM_001093726]	6414	GO:0019953|GO:0008430|GO:0001887|GO:0007420|GO:0007626|GO:0005576|GO:0009791|GO:0040007|GO:0006979|GO:0005615|GO:0070062	42800881	chr5	42800822	-	hs|5p12	NM_001093726	chr5:42800881-42800822	NM_001093726	Hs.275775
A_23_P86470	-4.31141	-2.10816	4.31141	down	cholesterol 25-hydroxylase	CH25H	FALSE	Homo sapiens cholesterol 25-hydroxylase (CH25H), mRNA [NM_003956]	9023	GO:0006629|GO:0001567|GO:0005506|GO:0006699|GO:0008395|GO:0044281|GO:0005829|GO:0005789|GO:0016126|GO:0006633|GO:0008206|GO:0016021|GO:0055114|GO:0008203	90965860	chr10	90965801	-	hs|10q23.31	NM_003956	chr10:90965860-90965801	NM_003956	Hs.47357
A_33_P3262171	-4.30156	-2.10486	4.30156	down	fer-1-like 6 (C. elegans)	FER1L6	FALSE	Homo sapiens fer-1-like 6 (C. elegans) (FER1L6), mRNA [NM_001039112]	654463	GO:0016021	125132302	chr8	125132243	+	hs|8q24.13	NM_001039112	chr8:125132243-125132302	NM_001039112	Hs.632058
A_33_P3243439	-4.28256	-2.09847	4.28256	down	G protein-coupled receptor 162	GPR162	FALSE	Homo sapiens G protein-coupled receptor 162 (GPR162), transcript variant A-2, mRNA [NM_019858]	27239	GO:0007186|GO:0005886|GO:0004930|GO:0016021	6936582	chr12	6936523	+	hs|12p13.31	NM_019858	chr12:6936523-6936582	NM_019858	Hs.631654
A_33_P3871347	-4.27012	-2.09428	4.27012	down	sushi, nidogen and EGF-like domains 1	SNED1	FALSE	Homo sapiens sushi, nidogen and EGF-like domains 1 (SNED1), mRNA [NM_001080437]	25992	GO:0007160|GO:0005509|GO:0070062	242032447	chr2	242032388	+	hs|2q37.3	NM_001080437	chr2:242032388-242032447	NM_001080437	Hs.471834
A_23_P94403	-4.26231	-2.09164	4.26231	down	tyrosinase-related protein 1	TYRP1	FALSE	Homo sapiens tyrosinase-related protein 1 (TYRP1), mRNA [NM_000550]	7306	GO:0005515|GO:0033162|GO:0042470|GO:0046982|GO:0005507|GO:0043438|GO:0032438|GO:0030318|GO:0042803|GO:0042438|GO:0016021|GO:0016716|GO:0030669|GO:0010008|GO:0055114	12709859	chr9	12709800	+	hs|9p23	NM_000550	chr9:12709800-12709859	NM_000550	Hs.270279
A_24_P232790	-4.25928	-2.09061	4.25928	down	coiled-coil domain containing 177	CCDC177	FALSE	Homo sapiens coiled-coil domain containing 177 (CCDC177), mRNA [NM_001271507]	56936		70037055	chr14	70036996	-	hs|14q24.1	NM_001271507	chr14:70037055-70036996	NM_001271507	Hs.458319
A_23_P365086	-4.25795	-2.09016	4.25795	down	ankyrin repeat and EF-hand domain containing 1	ANKEF1	FALSE	Homo sapiens ankyrin repeat and EF-hand domain containing 1 (ANKEF1), transcript variant 1, mRNA [NM_022096]	63926	GO:0005509	10036343	chr20	10036284	+	hs|20p12.2	NM_022096	chr20:10036284-10036343	NM_022096	Hs.70903
A_23_P66798	-4.25295	-2.08847	4.25295	down	keratin 19	KRT19	FALSE	Homo sapiens keratin 19 (KRT19), mRNA [NM_002276]	3880	GO:0005515|GO:0005882|GO:0030018|GO:0043627|GO:0060706|GO:0045214|GO:0032403|GO:0071944|GO:0042383|GO:0016010|GO:0005200|GO:0043034|GO:0016032|GO:0008307|GO:0070062	39679977	chr17	39679918	-	hs|17q21.2	NM_002276	chr17:39679977-39679918	NM_002276	Hs.654568
A_23_P156970	-4.24817	-2.08684	4.24817	down	mesoderm specific transcript	MEST	FALSE	Homo sapiens mesoderm specific transcript (MEST), transcript variant 1, mRNA [NM_002402]	4232	GO:0016787|GO:0005783|GO:0008152|GO:0005789|GO:0007498|GO:0032526|GO:0016021|GO:0010883|GO:0070062	130145707	chr7	130145648	+	hs|7q32.2	NM_002402	chr7:130145648-130145707	NM_002402	Hs.270978
A_24_P336577	-4.24696	-2.08643	4.24696	down	family with sequence similarity 212, member B	FAM212B	FALSE	Homo sapiens family with sequence similarity 212, member B (FAM212B), transcript variant 1, mRNA [NM_019099]	55924		112269251	chr1	112269192	-	hs|1p13.2	NM_019099	chr1:112269251-112269192	NM_019099	Hs.193406
A_23_P8108	-4.2458	-2.08604	4.2458	down	major histocompatibility complex, class II, DQ beta 1	HLA-DQB1	FALSE	Homo sapiens major histocompatibility complex, class II, DQ beta 1 (HLA-DQB1), transcript variant 3, mRNA [NM_001243962]	3119	GO:0050852|GO:0012507|GO:0005886|GO:0031295|GO:0019221|GO:0042613|GO:0005765|GO:0032588|GO:0030666|GO:0019886|GO:0006955|GO:0000139|GO:0016020|GO:0002381|GO:0042605|GO:0071556|GO:0032395|GO:0030669|GO:0010008|GO:0060333|GO:0002455|GO:0030658	32725656	chr6	32725597	-	hs|6p21.32	NM_001243962	chr6:032725656-032725597	NM_001243962	Hs.409934
A_19_P00319588	-4.23459	-2.08222	4.23459	down	uncharacterized LOC101929562	LOC101929562	FALSE	PREDICTED: Homo sapiens uncharacterized LOC101929562 (LOC101929562), ncRNA [XR_241537]	101929562		106561865	chr3	106561806	-	hs|3q13.12	XR_241537	chr3:106561865-106561806	XR_241537
A_24_P105747	-4.22889	-2.08028	4.22889	down	adaptor-related protein complex 1, sigma 3 subunit	AP1S3	FALSE	Homo sapiens adaptor-related protein complex 1, sigma 3 subunit (AP1S3), transcript variant 1, mRNA [NM_001039569]	130340	GO:0006892|GO:0005765|GO:0006886|GO:0032588|GO:0030117|GO:0005829|GO:0050690|GO:0019886|GO:0005905|GO:0000139|GO:0008565|GO:0061024|GO:0016032|GO:0030659	224622433	chr2	224622374	-	hs|2q36.1	NM_001039569	chr2:224622433-224622374	NM_001039569	Hs.632555
A_33_P3315779	-4.21761	-2.07643	4.21761	down	HECT and RLD domain containing E3 ubiquitin protein ligase family member 6	HERC6	FALSE	Homo sapiens HECT and RLD domain containing E3 ubiquitin protein ligase family member 6 (HERC6), transcript variant 2, mRNA [NM_001165136]	55008	GO:0005737|GO:0004842|GO:0042787|GO:0016874|GO:0005634|GO:0005829	89317293	chr4	89317234	+	hs|4q22.1	NM_001165136	chr4:89317234-89317293	NM_001165136	Hs.529317
A_33_P3347291	-4.2171	-2.07625	4.2171	down	indolethylamine N-methyltransferase	INMT	FALSE	Homo sapiens indolethylamine N-methyltransferase (INMT), transcript variant 2, mRNA [NM_001199219]	11185	GO:0030748|GO:0004790|GO:0009636|GO:0009308|GO:0032259|GO:0005829	30797217	chr7	30797158	+	hs|7p14.3	NM_001199219	chr7:30797158-30797217	NM_001199219	Hs.632629
A_23_P204158	-4.21222	-2.07458	4.21222	down	ring finger protein, transmembrane 2	RNFT2	FALSE	Homo sapiens ring finger protein, transmembrane 2 (RNFT2), transcript variant 2, mRNA [NM_032814]	84900	GO:0008270|GO:0016021	117290574	chr12	117290515	+	hs|12q24.22	NM_032814	chr12:117290515-117290574	NM_032814	Hs.437195
A_23_P153745	-4.17945	-2.06331	4.17945	down	interferon, gamma-inducible protein 30	IFI30	FALSE	Homo sapiens interferon, gamma-inducible protein 30 (IFI30), mRNA [NM_006332]	10437	GO:0016667|GO:0030054|GO:0005886|GO:0019221|GO:0042590|GO:0048147|GO:0050821|GO:0005576|GO:0005764|GO:0043231|GO:0019886|GO:0005737|GO:0060333|GO:0055114|GO:0043202	18288899	chr19	18288840	+	hs|19p13.11	NM_006332	chr19:18288840-18288899	NM_006332	Hs.14623
A_33_P3320683	-4.17697	-2.06246	4.17697	down	long intergenic non-protein coding RNA 993	LINC00993	FALSE	Homo sapiens long intergenic non-protein coding RNA 993 (LINC00993), long non-coding RNA [NR_104061]	101929520		37635855	chr10	37635796	+	hs|10p11.21	NR_104061	chr10:37635796-37635855	NR_104061
A_23_P67896	-4.1715	-2.06057	4.1715	down	sodium channel, voltage-gated, type III, alpha subunit	SCN3A	FALSE	Homo sapiens sodium channel, voltage-gated, type III, alpha subunit (SCN3A), transcript variant 1, mRNA [NM_006922]	6328	GO:0005737|GO:0086010|GO:0005886|GO:0005248|GO:0035725|GO:0034765|GO:0001518|GO:0006814|GO:0019228	165946977	chr2	165946918	-	hs|2q24.3	NM_006922	chr2:165946977-165946918	NM_006922	Hs.435274
A_23_P40657	-4.17149	-2.06056	4.17149	down	glycine C-acetyltransferase	GCAT	FALSE	Homo sapiens glycine C-acetyltransferase (GCAT), transcript variant 2, mRNA [NM_014291]	23464	GO:0005739|GO:0019518|GO:0006520|GO:0009058|GO:0008890|GO:0030170|GO:0005730|GO:0005634	38212597	chr22	38212293	+	hs|22q13.1	NM_014291	chr22:38212293-38212597	NM_014291	Hs.54609
A_19_P00320685	-4.16916	-2.05976	4.16916	down			FALSE	Homo sapiens full length insert cDNA clone YA80A03. [AF147305]			38364243	chr15	38364184	-	hs|15q14		chr15:38364243-38364184		Hs.285193
A_23_P30976	-4.16457	-2.05817	4.16457	down	glutamate receptor, metabotropic 1	GRM1	FALSE	Homo sapiens glutamate receptor, metabotropic 1 (GRM1), transcript variant 4, mRNA [NM_001278065]	2911	GO:0005515|GO:0051966|GO:0008219|GO:0005886|GO:0004930|GO:0007216|GO:0014069|GO:0007268|GO:0005634|GO:0030425|GO:0019233|GO:0007205|GO:0038038|GO:0000187|GO:0071257|GO:0000186|GO:0007186|GO:0005887|GO:0008066|GO:0007626|GO:0051930	146758513	chr6	146758454	+	hs|6q24.3	NM_001278065	chr6:146758454-146758513	NM_001278065	Hs.32945
A_23_P396299	-4.16357	-2.05782	4.16357	down	MRVI1 antisense RNA 1	MRVI1-AS1	FALSE	Homo sapiens MRVI1 antisense RNA 1 (MRVI1-AS1), transcript variant 4, long non-coding RNA [NR_034094]	100129827		10615729	chr11	10615670	+	hs|11p15.4	NR_034094	chr11:10615670-10615729	NR_034094	Hs.246769
A_23_P71880	-4.16298	-2.05762	4.16298	down	serine peptidase inhibitor, Kazal type 4	SPINK4	FALSE	Homo sapiens serine peptidase inhibitor, Kazal type 4 (SPINK4), mRNA [NM_014471]	27290	GO:0010951|GO:0004867|GO:0042493|GO:0005576	33248476	chr9	33246720	+	hs|9p13.3	NM_014471	chr9:33246720-33248476	NM_014471	Hs.555934
A_33_P3294459	-4.15244	-2.05396	4.15244	down	COPG2 imprinted transcript 1 (non-protein coding)	COPG2IT1	FALSE	Homo sapiens COPG2 imprinted transcript 1 (non-protein coding) (COPG2IT1), long non-coding RNA [NR_024086]	53844							NR_024086		NR_024086	Hs.715567
A_23_P7866	-4.15074	-2.05337	4.15074	down	G protein-coupled receptor 115	GPR115	FALSE	Homo sapiens G protein-coupled receptor 115 (GPR115), mRNA [NM_153838]	221393	GO:0007186|GO:0005886|GO:0007218|GO:0004930|GO:0016021	47682783	chr6	47682724	+	hs|6p12.3	NM_153838	chr6:47682724-47682783	NM_153838	Hs.150131
A_23_P156562	-4.12443	-2.04419	4.12443	down	cysteine-rich protein 3	CRIP3	FALSE	Homo sapiens cysteine-rich protein 3 (CRIP3), mRNA [NM_206922]	401262	GO:0005737|GO:0042098|GO:0008270	43273423	chr6	43273364	-	hs|6p21.1	NM_206922	chr6:43273423-43273364	NM_206922	Hs.653165
A_24_P339416	-4.11409	-2.04057	4.11409	down	arylsulfatase G	ARSG	FALSE	Homo sapiens arylsulfatase G (ARSG), transcript variant 1, mRNA [NM_014960]	22901	GO:0006665|GO:0006790|GO:0006687|GO:0005783|GO:0005788|GO:0004065|GO:0044281|GO:0044267|GO:0005764|GO:0005615|GO:0046872|GO:0043687	66416588	chr17	66416529	+	hs|17q24.2	NM_014960	chr17:66416529-66416588	NM_014960	Hs.437249
A_23_P363275	-4.11349	-2.04036	4.11349	down	WD repeat domain 66	WDR66	FALSE	Homo sapiens WD repeat domain 66 (WDR66), transcript variant 1, mRNA [NM_144668]	144406	GO:0005509	122441714	chr12	122441655	+	hs|12q24.31	NM_144668	chr12:122441655-122441714	NM_144668	Hs.709837
A_19_P00316010	-4.10364	-2.0369	4.10364	down			FALSE	Homo sapiens cDNA FLJ32413 fis, clone SKMUS2000705. [AK056975]			67549923	chr17	67549864	+	hs|17q24.3	AK056975	chr17:67549864-67549923		Hs.49329
A_33_P3287223	-4.10106	-2.036	4.10106	down	dipeptidyl-peptidase 4	DPP4	FALSE	Homo sapiens dipeptidyl-peptidase 4 (DPP4), mRNA [NM_001935]	1803	GO:0005515|GO:0008284|GO:0005886|GO:0004252|GO:0031295|GO:0030139|GO:0005765|GO:0002020|GO:0010716|GO:0042803|GO:0042802|GO:0046581|GO:0016324|GO:0071438|GO:0006508|GO:0007155|GO:0070062|GO:0001666|GO:0009986|GO:0031258|GO:0005102|GO:0033632|GO:0030027|GO:0042110|GO:0043542|GO:0004177|GO:0008236|GO:0045121|GO:0016021|GO:0008239	162849045	chr2	162848986	-	hs|2q24.2	NM_001935	chr2:162849045-162848986	NM_001935	Hs.368912
A_23_P216596	-4.09723	-2.03465	4.09723	down	sushi, von Willebrand factor type A, EGF and pentraxin domain containing 1	SVEP1	FALSE	Homo sapiens sushi, von Willebrand factor type A, EGF and pentraxin domain containing 1 (SVEP1), mRNA [NM_153366]	79987	GO:0005737|GO:0016020|GO:0003682|GO:0005509|GO:0005576|GO:0007155	113137663	chr9	113132253	-	hs|9q31.3	NM_153366	chr9:113137663-113132253	NM_153366	Hs.522334
A_33_P3225760	-4.09695	-2.03455	4.09695	down	protocadherin 18	PCDH18	FALSE	Homo sapiens protocadherin 18 (PCDH18), mRNA [NM_019035]	54510	GO:0005886|GO:0007420|GO:0005509|GO:0016021|GO:0007156	138453085	chr4	138453026	-	hs|4q28.3	NM_019035	chr4:138453085-138453026	NM_019035	Hs.591691
A_23_P86599	-4.09272	-2.03306	4.09272	down	deleted in malignant brain tumors 1	DMBT1	FALSE	Homo sapiens deleted in malignant brain tumors 1 (DMBT1), transcript variant 2, mRNA [NM_007329]	1755	GO:0005515|GO:0001833|GO:0005578|GO:0005576|GO:0015031|GO:0005615|GO:0035375|GO:0006898|GO:0051607|GO:0030858|GO:0002221|GO:0005737|GO:0042589|GO:0045087|GO:0030855|GO:0030670|GO:0016032|GO:0043152|GO:0070062|GO:0048306|GO:0005044|GO:0008329|GO:0019898	124403211	chr10	124403152	+	hs|10q26.13	NM_007329	chr10:124403152-124403211	NM_007329	Hs.279611
A_23_P19624	-4.08549	-2.03051	4.08549	down	bone morphogenetic protein 6	BMP6	FALSE	Homo sapiens bone morphogenetic protein 6 (BMP6), mRNA [NM_001718]	654	GO:0051216|GO:0001654|GO:0050714|GO:0060395|GO:0005615|GO:0030539|GO:0006955|GO:0005737|GO:0006954|GO:0045944|GO:0010039|GO:0032026|GO:0032332|GO:0032526|GO:0050679|GO:0014823|GO:0030501|GO:0046982|GO:0001822|GO:0031988|GO:0010862|GO:0051384|GO:0003323|GO:0030509|GO:2000860|GO:0005125|GO:0001649|GO:0045669|GO:0001958|GO:0001501|GO:0001938|GO:0070700|GO:0045666|GO:2000105|GO:0071260|GO:0045603|GO:…	7881454	chr6	7881395	+	hs|6p24.3	NM_001718	chr6:7881395-7881454	NM_001718	Hs.285671
A_19_P00322895	-4.08363	-2.02985	4.08363	down	long intergenic non-protein coding RNA 973	LINC00973	FALSE	long intergenic non-protein coding RNA 973 [Source:HGNC Symbol;Acc:48868] [ENST00000473756]	100506377		98701744	chr3	98701685	+	hs|3q12.1	TCONS_00005559	chr3:98701685-98701744		Hs.307772
A_33_P3333982	-4.08357	-2.02983	4.08357	down	phosphodiesterase 4D interacting protein	PDE4DIP	FALSE	Homo sapiens phosphodiesterase 4D interacting protein (PDE4DIP), transcript variant 3, mRNA [NM_022359]	9659	GO:0005515|GO:0005813|GO:0005737|GO:0005794|GO:0005634|GO:0030016|GO:0019899|GO:0043623	144951824	chr1	144951765	-	hs|1q21.1	NM_022359	chr1:144951824-144951765	NM_022359	Hs.731111
A_33_P3415430	-4.07205	-2.02575	4.07205	down	heat shock 70kDa protein 1B	HSPA1B	FALSE	Homo sapiens heat shock 70kDa protein 1B (HSPA1B), mRNA [NM_005346]	3304	GO:0006986|GO:0005515|GO:0003725|GO:0090084|GO:0010467|GO:0048471|GO:0030308|GO:0008285|GO:0042623|GO:0006200|GO:0005783|GO:0072562|GO:0005634|GO:0005829|GO:0034605|GO:0005739|GO:0042026|GO:0005737|GO:0008180|GO:0001618|GO:0031072|GO:2001240|GO:0060548|GO:0016887|GO:0031625|GO:0010941|GO:0070370|GO:0070062|GO:0043066|GO:0016070|GO:0016235|GO:0005814|GO:0016071|GO:0016234|GO:0006402|GO:0009615|GO:…	31797929	chr6	31797870	+	hs|6p21.33	NM_005346	chr6:31797870-31797929	NM_005346	Hs.719966
A_24_P406986	-4.07187	-2.02569	4.07187	down	solute carrier family 43, member 3	SLC43A3	FALSE	Homo sapiens solute carrier family 43, member 3 (SLC43A3), transcript variant 3, mRNA [NM_199329]	29015	GO:0008150|GO:0003674|GO:0016021|GO:0005575|GO:0055085	57176654	chr11	57175317	-	hs|11q12.1	NM_199329	chr11:57176654-57175317	NM_199329	Hs.99962
A_33_P3258617	-4.05085	-2.01823	4.05085	down	perilipin 2	PLIN2	FALSE	perilipin 2 [Source:HGNC Symbol;Acc:248] [ENST00000380464]	123	GO:0005811|GO:0014070|GO:0005886|GO:0019915|GO:0005783|GO:0042493|GO:0005634|GO:0005576|GO:0044281|GO:0015909|GO:0044255	19123462	chr9	19123403	-	hs|9p22.1		chr9:19123462-19123403
A_33_P3220911	-4.04496	-2.01612	4.04496	down	bone marrow stromal cell antigen 2	BST2	FALSE	Homo sapiens bone marrow stromal cell antigen 2 (BST2), mRNA [NM_004335]	684	GO:0005515|GO:0030308|GO:0005886|GO:0008283|GO:0035456|GO:0035455|GO:0007267|GO:0031225|GO:0042803|GO:0051607|GO:0005737|GO:0016324|GO:0006959|GO:0002737|GO:0032956|GO:0004871|GO:0034341|GO:0043123|GO:0070062|GO:0045071|GO:0030336|GO:0005794|GO:0009986|GO:0005770|GO:0007275|GO:0009615|GO:0010951|GO:0042113|GO:0007165|GO:0005887|GO:0045087|GO:0008191|GO:0045121	17513807	chr19	17513748	-	hs|19p13.11	NM_004335	chr19:17513807-17513748	NM_004335	Hs.118110
A_23_P259251	-4.00655	-2.00236	4.00655	down	potassium voltage-gated channel, Shal-related subfamily, member 2	KCND2	FALSE	Homo sapiens potassium voltage-gated channel, Shal-related subfamily, member 2 (KCND2), mRNA [NM_012281]	3751	GO:0005251|GO:0005515|GO:0005250|GO:0005886|GO:0007268|GO:0046872|GO:0043197|GO:0005249|GO:0008076|GO:0034765|GO:0051260|GO:0001508|GO:0071805	120390210	chr7	120390151	+	hs|7q31.31	NM_012281	chr7:120390151-120390210	NM_012281	Hs.654739
A_32_P213831	-4.00409	-2.00147	4.00409	down	striatin interacting protein 2	STRIP2	FALSE	Homo sapiens striatin interacting protein 2 (STRIP2), transcript variant 1, mRNA [NM_020704]	57464	GO:0003674|GO:0005737|GO:0016477|GO:0008360|GO:0007010	129122780	chr7	129122721	+	hs|7q32.1	NM_020704	chr7:129122721-129122780	NM_020704	Hs.489988
A_32_P93996	-3.99595	-1.99854	3.99595	down	uncharacterized LOC100128361	LOC100128361	FALSE	Homo sapiens uncharacterized LOC100128361 (LOC100128361), long non-coding RNA [NR_036505]	100128361		95382307	chr9	95382248	+	hs|9q22.31	NR_036505	chr9:95382248-95382307	NR_036505	Hs.660395
A_23_P331560	-3.99526	-1.99829	3.99526	down	solute carrier family 26 (anion exchanger), member 4	SLC26A4	FALSE	Homo sapiens solute carrier family 26 (anion exchanger), member 4 (SLC26A4), mRNA [NM_000441]	5172	GO:0005886|GO:0007605|GO:0015698|GO:0031526|GO:0015111|GO:0055085|GO:0006885|GO:0032880|GO:0016324|GO:0015116|GO:0015108|GO:0008272|GO:0008271|GO:0016021|GO:0015705|GO:0070062|GO:0006811	107357992	chr7	107357933	+	hs|7q22.3	NM_000441	chr7:107357933-107357992	NM_000441	Hs.571246
A_33_P3404588	-3.99351	-1.99766	3.99351	down	FYVE, RhoGEF and PH domain containing 4	FGD4	FALSE	Homo sapiens FYVE, RhoGEF and PH domain containing 4 (FGD4), mRNA [NM_139241]	121512	GO:0051056|GO:0048011|GO:0043065|GO:0030036|GO:0005794|GO:0031267|GO:0030035|GO:0007264|GO:0008360|GO:0030032|GO:0003779|GO:0030175|GO:0015629|GO:0097190|GO:0001726|GO:0046872|GO:0030027|GO:0043088|GO:0005829|GO:0005085|GO:0005737|GO:0007010|GO:0046847|GO:0005089	32764208	chr12	32764149	+	hs|12p11.21	NM_139241	chr12:32764149-32764208	NM_139241	Hs.117835
A_33_P3288844	-3.99328	-1.99757	3.99328	down	interleukin 6 receptor	IL6R	FALSE	Homo sapiens interleukin 6 receptor (IL6R), transcript variant 1, mRNA [NM_000565]	3570	GO:0005515|GO:0005138|GO:0032755|GO:0008284|GO:0032717|GO:0070119|GO:0005886|GO:0050830|GO:0019221|GO:0050731|GO:0019981|GO:0005615|GO:0042803|GO:0016323|GO:0016324|GO:0051092|GO:0002384|GO:0070102|GO:0004897|GO:0034097|GO:0010536|GO:0002446|GO:0009986|GO:0042517|GO:0004915|GO:0005896|GO:0005576|GO:0006953|GO:0032722|GO:0097191|GO:0070120|GO:0048661|GO:0002690|GO:0002548|GO:0045669|GO:0050829|GO:…	154440096	chr1	154440037	+	hs|1q21.3	NM_000565	chr1:154440037-154440096	NM_000565	Hs.135087
A_23_P316612	-3.98348	-1.99403	3.98348	down	GLIS family zinc finger 1	GLIS1	FALSE	Homo sapiens GLIS family zinc finger 1 (GLIS1), mRNA [NM_147193]	148979	GO:0006366|GO:0045944|GO:0005634|GO:0000122|GO:0003677|GO:0046872	53971989	chr1	53971930	-	hs|1p32.3	NM_147193	chr1:53971989-53971930	NM_147193	Hs.306691
A_33_P3347869	-3.98219	-1.99356	3.98219	down	complement component 3	C3	FALSE	Homo sapiens complement component 3 (C3), mRNA [NM_000064]	718	GO:0005515|GO:0030449|GO:0005886|GO:0004866|GO:0072562|GO:0001970|GO:0005615|GO:0006957|GO:0006956|GO:0006955|GO:0006954|GO:0006958|GO:0006631|GO:0001798|GO:0070062|GO:0045745|GO:2000427|GO:0005102|GO:0005576|GO:0010884|GO:0010866|GO:0010575|GO:0031715|GO:0045766|GO:0010828|GO:0010951|GO:0007165|GO:0007186|GO:0045087|GO:0050776|GO:0001934	6686195	chr19	6686136	-	hs|19p13.3	NM_000064	chr19:6686195-6686136	NM_000064	Hs.529053
A_19_P00813192	-3.97616	-1.99137	3.97616	down	caspase 4, apoptosis-related cysteine peptidase pseudogene	LOC643733	FALSE		643733		104774292	chr11	104774233	-	hs|11q22.3		chr11:104774292-104774233
A_23_P70278	-3.97245	-1.99003	3.97245	down	c-ros oncogene 1 , receptor tyrosine kinase	ROS1	FALSE	Homo sapiens c-ros oncogene 1 , receptor tyrosine kinase (ROS1), mRNA [NM_002944]	6098	GO:0005515|GO:0032006|GO:0005886|GO:0008283|GO:0019903|GO:0018108|GO:0007283|GO:0005524|GO:0030154|GO:0002066|GO:0016020|GO:0010629|GO:0016049|GO:0006468|GO:0016021|GO:0004713|GO:0004714|GO:0070372|GO:0007169|GO:0010966	117609672	chr6	117609613	-	hs|6q22.1	NM_002944	chr6:117609672-117609613	NM_002944	Hs.1041
A_23_P39465	-3.96785	-1.98836	3.96785	down	bone marrow stromal cell antigen 2	BST2	FALSE	Homo sapiens bone marrow stromal cell antigen 2 (BST2), mRNA [NM_004335]	684	GO:0005515|GO:0030308|GO:0005886|GO:0008283|GO:0035456|GO:0035455|GO:0007267|GO:0031225|GO:0042803|GO:0051607|GO:0005737|GO:0016324|GO:0006959|GO:0002737|GO:0032956|GO:0004871|GO:0034341|GO:0043123|GO:0070062|GO:0045071|GO:0030336|GO:0005794|GO:0009986|GO:0005770|GO:0007275|GO:0009615|GO:0010951|GO:0042113|GO:0007165|GO:0005887|GO:0045087|GO:0008191|GO:0045121	17514113	chr19	17514054	-	hs|19p13.11	NM_004335	chr19:17514113-17514054	NM_004335	Hs.118110
A_23_P372988	-3.96381	-1.98689	3.96381	down	proline rich 22	PRR22	FALSE	Homo sapiens proline rich 22 (PRR22), mRNA [NM_001134316]	163154		5783222	chr19	5783163	-	hs|19p13.3	NM_001134316	chr19:5783222-5783163	NM_001134316	Hs.631838
A_23_P254507	-3.95901	-1.98514	3.95901	down	HOP homeobox	HOPX	FALSE	Homo sapiens HOP homeobox (HOPX), transcript variant 2, mRNA [NM_139211]	84525	GO:0016575|GO:0003700|GO:0048286|GO:0008016|GO:0043393|GO:0005634|GO:0000122|GO:0001829|GO:0006351|GO:0007507|GO:0043565|GO:0043415|GO:0051155|GO:0045596	57514502	chr4	57514443	-	hs|4q12	NM_139211	chr4:57514502-57514443	NM_139211	Hs.619396
A_23_P408955	-3.95165	-1.98246	3.95165	down	E2F transcription factor 2	E2F2	FALSE	Homo sapiens E2F transcription factor 2 (E2F2), mRNA [NM_004091]	1870	GO:0005515|GO:0005667|GO:0006355|GO:0006367|GO:0003700|GO:0072332|GO:0051726|GO:0005654|GO:0001047|GO:0000278|GO:0003677|GO:0008134	23832992	chr1	23832933	-	hs|1p36.12	NM_004091	chr1:23832992-23832933	NM_004091	Hs.194333
A_33_P3329444	-3.94019	-1.97826	3.94019	down	MEF2 activating motif and SAP domain containing transcriptional regulator	MAMSTR	FALSE	Homo sapiens MEF2 activating motif and SAP domain containing transcriptional regulator (MAMSTR), transcript variant 2, mRNA [NM_182574]	284358	GO:0001076|GO:0006366|GO:0045944|GO:0010831|GO:0005634|GO:0003676	49216315	chr19	49216256	-	hs|19q13.33	NM_182574	chr19:49216315-49216256	NM_182574	Hs.191815
A_23_P205428	-3.93632	-1.97685	3.93632	down	forkhead box G1	FOXG1	FALSE	Homo sapiens forkhead box G1 (FOXG1), mRNA [NM_005249]	2290	GO:0005515|GO:0003700|GO:0042472|GO:0007568|GO:0048664|GO:0002052|GO:0005634|GO:0009953|GO:0045787|GO:0003677|GO:0006351|GO:0021852|GO:0043565|GO:0007346|GO:0045665|GO:0007420|GO:0016199|GO:0045892	29238648	chr14	29238589	+	hs|14q12	NM_005249	chr14:29238589-29238648	NM_005249	Hs.632336
A_19_P00316319	-3.92386	-1.97227	3.92386	down	PHD finger protein 3	PHF3	FALSE	PHD finger protein 3 [Source:HGNC Symbol;Acc:8921] [ENST00000505138]	23469	GO:0003674|GO:0008270|GO:0007275|GO:0005634|GO:0005575|GO:0006351	64488072	chr6	64488013	+	hs|6q12		chr6:64488013-64488072
A_23_P55356	-3.91464	-1.96888	3.91464	down	vitelline membrane outer layer 1 homolog (chicken)	VMO1	FALSE	Homo sapiens vitelline membrane outer layer 1 homolog (chicken) (VMO1), transcript variant 1, mRNA [NM_182566]	284013	GO:0030704|GO:0008150|GO:0003674|GO:0070062	4688732	chr17	4688673	-	hs|17p13.2	NM_182566	chr17:4688732-4688673	NM_182566	Hs.122561
A_33_P3334384	-3.89782	-1.96267	3.89782	down	KDM4A antisense RNA 1	KDM4A-AS1	FALSE	Homo sapiens KDM4A antisense RNA 1 (KDM4A-AS1), long non-coding RNA [NR_033827]	100132774		44168387	chr1	44168328	-	hs|1p34.1	NR_033827	chr1:44168387-44168328	NR_033827	Hs.655569
A_23_P111583	-3.89486	-1.96157	3.89486	down	CD36 molecule (thrombospondin receptor)	CD36	FALSE	Homo sapiens CD36 molecule (thrombospondin receptor) (CD36), transcript variant 2, mRNA [NM_001001547]	948	GO:0032755|GO:0002474|GO:0035634|GO:0050830|GO:0019915|GO:0050731|GO:0030301|GO:0042992|GO:0005615|GO:0060100|GO:0005041|GO:0015911|GO:0042953|GO:0002755|GO:0044130|GO:0043123|GO:0044255|GO:0005794|GO:0038124|GO:0009986|GO:0032760|GO:0038123|GO:0010744|GO:0034134|GO:0030169|GO:0043277|GO:0030168|GO:0000122|GO:0002224|GO:0006898|GO:0055096|GO:0005887|GO:0045087|GO:0045121|GO:0009897|GO:0001954|GO:…	80303343	chr7	80302711	+	hs|7q21.11	NM_001001547	chr7:80302711-80303343	NM_001001547	Hs.120949
A_33_P3219245	-3.89421	-1.96133	3.89421	down	long intergenic non-protein coding RNA 476	LINC00476	FALSE	Homo sapiens long intergenic non-protein coding RNA 476 (LINC00476), transcript variant 1, long non-coding RNA [NR_023390]	100128782		98568545	chr9	98568486	-	hs|9q22.32	NR_023390	chr9:98568545-98568486	NR_023390	Hs.494549
A_24_P400324	-3.89331	-1.961	3.89331	down	thrombospondin, type I, domain containing 7A	THSD7A	FALSE	Homo sapiens thrombospondin, type I, domain containing 7A (THSD7A), mRNA [NM_015204]	221981	GO:0005886|GO:0016021|GO:0001525|GO:0030154|GO:0070062	11414524	chr7	11414465	-	hs|7p21.3	NM_015204	chr7:11414524-11414465	NM_015204	Hs.120855
A_33_P3411907	-3.87971	-1.95595	3.87971	down	fibroblast growth factor 5	FGF5	FALSE	Homo sapiens fibroblast growth factor 5 (FGF5), transcript variant 2, mRNA [NM_033143]	2250	GO:0008286|GO:0048011|GO:0008284|GO:0008283|GO:0023019|GO:0048015|GO:0007267|GO:0005104|GO:0005576|GO:0005615|GO:0007399|GO:0007173|GO:0008543|GO:0045087|GO:0010001|GO:0051781|GO:0008083|GO:0038095	81188152	chr4	81188093	+	hs|4q21.21	NM_033143	chr4:81188093-81188152	NM_033143	Hs.37055
A_33_P3376140	-3.87005	-1.95235	3.87005	down	potassium inwardly-rectifying channel, subfamily J, member 15	KCNJ15	FALSE	Homo sapiens potassium inwardly-rectifying channel, subfamily J, member 15 (KCNJ15), transcript variant 1, mRNA [NM_170736]	3772	GO:0005515|GO:0005242|GO:0005886|GO:0005887|GO:0007268|GO:0034765|GO:0006813|GO:0071805	39673412	chr21	39673353	+	hs|21q22.13	NM_170736	chr21:39673353-39673412	NM_170736	Hs.411299
A_24_P170983	-3.86524	-1.95056	3.86524	down	espin-like	ESPNL	FALSE	Homo sapiens espin-like (ESPNL), mRNA [NM_194312]	339768		239041908	chr2	239041849	+	hs|2q37.3	NM_194312	chr2:239041849-239041908	NM_194312	Hs.127724
A_33_P3315949	-3.86283	-1.94966	3.86283	down	coiled-coil domain containing 103	CCDC103	FALSE	Homo sapiens coiled-coil domain containing 103 (CCDC103), transcript variant 4, mRNA [NM_001258397]	388389	GO:0060287|GO:0001947|GO:0036159|GO:0005737|GO:0005930|GO:0030030|GO:0036158|GO:0003341|GO:0070286|GO:0071907|GO:0042803	42980250	chr17	42980191	+	hs|17q21.31	NM_001258397	chr17:42980191-42980250	NM_001258397	Hs.743398
A_19_P00321214	-3.8602	-1.94868	3.8602	down			FALSE	Q412F2_KINRA (Q412F2) MOSC, partial (10%) [THC2481836]			46476039	chr22	46475980	+	hs|22q13.31		chr22:046475980-046476039
A_33_P3291541	-3.85493	-1.94671	3.85493	down	transmembrane and coiled-coil domains 4	TMCO4	FALSE	Homo sapiens transmembrane and coiled-coil domains 4 (TMCO4), mRNA [NM_181719]	255104	GO:0016021	20063925	chr1	20063866	-	hs|1p36.13	NM_181719	chr1:20063925-20063866	NM_181719	Hs.656313
A_33_P3317613	-3.84384	-1.94255	3.84384	down	synapsin II	SYN2	FALSE	Homo sapiens synapsin II (SYN2), transcript variant IIa, mRNA [NM_133625]	6854	GO:0030054|GO:0008152|GO:0007268|GO:0003824|GO:0005524|GO:0007269|GO:0008021	12232907	chr3	12232848	+	hs|3p25.2	NM_133625	chr3:12232848-12232907	NM_133625	Hs.445503
A_24_P169634	-3.84105	-1.9415	3.84105	down	mannose-binding lectin (protein A) 1, pseudogene	MBL1P	FALSE	Homo sapiens mannose-binding lectin (protein A) 1, pseudogene (MBL1P), non-coding RNA [NR_002724]	8512		81682735	chr10	81682676	+	hs|10q22.3		chr10:81682676-81682735	NR_002724	Hs.733579
A_33_P3251856	-3.81089	-1.93013	3.81089	down			FALSE				23025305	chr14	23025246	-	hs|14q11.2		chr14:023025305-023025246
A_19_P00807553	-3.80899	-1.92941	3.80899	down			FALSE	Q9BVW3_HUMAN (Q9BVW3) Kynureninase (L-kynurenine hydrolase), isoform b, partial (79%) [THC2627781]			143508611	chr2	143508552	+	hs|2q22.2		chr2:143508552-143508611
A_23_P100660	-3.80664	-1.92852	3.80664	down	serpin peptidase inhibitor, clade F (alpha-2 antiplasmin, pigment epithelium derived factor), member 1	SERPINF1	FALSE	Homo sapiens serpin peptidase inhibitor, clade F (alpha-2 antiplasmin, pigment epithelium derived factor), member 1 (SERPINF1), mRNA [NM_002615]	5176	GO:0060770|GO:0042470|GO:0001822|GO:0004867|GO:0008283|GO:0007614|GO:0007568|GO:0051384|GO:0005576|GO:0007275|GO:0005615|GO:0010951|GO:0030162|GO:0031012|GO:0050769|GO:0050728|GO:0016525|GO:0032526|GO:0070062	1680727	chr17	1680668	+	hs|17p13.3	NM_002615	chr17:1680668-1680727	NM_002615	Hs.532768
A_33_P3224495	-3.80521	-1.92798	3.80521	down	KCNQ5 intronic transcript 1 (non-protein coding)	KCNQ5-IT1	FALSE	Homo sapiens KCNQ5 intronic transcript 1 (non-protein coding) (KCNQ5-IT1), long non-coding RNA [NR_120503]	100507381		73388218	chr6	73388159	+	hs|6q13	NR_120503	chr6:73388159-73388218	NR_120503	Hs.662412
A_33_P3234025	-3.79655	-1.92469	3.79655	down	kazrin, periplakin interacting protein	KAZN	FALSE	PREDICTED: Homo sapiens kazrin, periplakin interacting protein (KAZN), transcript variant X2, mRNA [XM_005245796]	23254	GO:0030057|GO:0005737|GO:0031424|GO:0005634|GO:0001533	14507087	chr1	14507028	+	hs|1p36.21	XM_005245796	chr1:14507028-14507087	XM_005245796
A_23_P51019	-3.79226	-1.92306	3.79226	down	sodium channel, voltage-gated, type II, alpha subunit	SCN2A	FALSE	Homo sapiens sodium channel, voltage-gated, type II, alpha subunit (SCN2A), transcript variant 1, mRNA [NM_021007]	6326	GO:0030424|GO:0086010|GO:0005886|GO:0042552|GO:0005248|GO:0031226|GO:0034706|GO:0030315|GO:0033270|GO:0051402|GO:0019228|GO:0033268|GO:0014704|GO:0005887|GO:0035725|GO:0034765|GO:0001518|GO:0006814|GO:0008627	166246166	chr2	166246107	+	hs|2q24.3	NM_021007	chr2:166246107-166246166	NM_021007	Hs.93485
A_33_P3399980	-3.78895	-1.9218	3.78895	down	tyrosinase-related protein 1	TYRP1	FALSE	Homo sapiens tyrosinase-related protein 1 (TYRP1), mRNA [NM_000550]	7306	GO:0005515|GO:0033162|GO:0042470|GO:0046982|GO:0005507|GO:0043438|GO:0032438|GO:0030318|GO:0042803|GO:0042438|GO:0016021|GO:0016716|GO:0030669|GO:0010008|GO:0055114	12709235	chr9	12709176	+	hs|9p23	NM_000550	chr9:12709176-12709235	NM_000550	Hs.270279
A_24_P50245	-3.78691	-1.92102	3.78691	down	major histocompatibility complex, class II, DM alpha	HLA-DMA	FALSE	Homo sapiens major histocompatibility complex, class II, DM alpha (HLA-DMA), mRNA [NM_006120]	3108	GO:0048839|GO:0016064|GO:0009986|GO:0005771|GO:0002503|GO:0042613|GO:0005765|GO:0015031|GO:0045059|GO:0019886|GO:0050778|GO:0031902|GO:0051085|GO:0023026|GO:0016021|GO:0045582|GO:0070062	32917477	chr6	32917418	-	hs|6p21.32	NM_006120	chr6:32917477-32917418	NM_006120	Hs.728759
A_23_P385911	-3.78209	-1.91918	3.78209	down	centrosomal protein 44kDa	CEP44	FALSE	Homo sapiens centrosomal protein 44kDa (CEP44), transcript variant 2, mRNA [NM_001145314]	80817	GO:0005813|GO:0005737|GO:0000922|GO:0030496	175253397	chr4	175253338	+	hs|4q34.1	NM_001145314	chr4:175253338-175253397	NM_001145314	Hs.555989
A_23_P69573	-3.77488	-1.91643	3.77488	down	guanylate cyclase 1, soluble, alpha 3	GUCY1A3	FALSE	Homo sapiens guanylate cyclase 1, soluble, alpha 3 (GUCY1A3), transcript variant 1, mRNA [NM_000856]	2982	GO:0007263|GO:0052565|GO:0008015|GO:0004383|GO:0005525|GO:0060087|GO:0008074|GO:0007596|GO:0006182|GO:0008217|GO:0004872|GO:0030828|GO:0020037	156651224	chr4	156643328	+	hs|4q32.1	NM_000856	chr4:156643328-156651224	NM_000856	Hs.24258
A_19_P00331794	-3.77301	-1.91572	3.77301	down			FALSE				130872591	chrX	130872532	-	hs|Xq26.2		chrX:130872591-130872532
A_19_P00319745	-3.76921	-1.91426	3.76921	down	RFX family member 8, lacking RFX DNA binding domain	RFX8	FALSE	Homo sapiens RFX family member 8, lacking RFX DNA binding domain (RFX8), mRNA [NM_001145664]	731220	GO:0006355|GO:0005634|GO:0003677|GO:0006351	102034067	chr2	102034008	-	hs|2q11.2	NM_001145664	chr2:102034067-102034008	NM_001145664	Hs.662488
A_33_P3330264	-3.76786	-1.91375	3.76786	down	chemokine (C-X-C motif) ligand 1 (melanoma growth stimulating activity, alpha)	CXCL1	FALSE	Homo sapiens chemokine (C-X-C motif) ligand 1 (melanoma growth stimulating activity, alpha) (CXCL1), transcript variant 1, mRNA [NM_001511]	2919	GO:0008009|GO:0030036|GO:0008285|GO:0008283|GO:0005102|GO:0005576|GO:0043085|GO:0005615|GO:0007399|GO:0035556|GO:0007165|GO:0006955|GO:0006954|GO:0006935|GO:0007186|GO:0060326|GO:0008047|GO:0008083	74735705	chr4	74735646	+	hs|4q13.3	NM_001511	chr4:74735646-74735705	NM_001511	Hs.789
A_23_P138541	-3.75979	-1.91065	3.75979	down	aldo-keto reductase family 1, member C3	AKR1C3	FALSE	Homo sapiens aldo-keto reductase family 1, member C3 (AKR1C3), transcript variant 1, mRNA [NM_003739]	8644	GO:0019369|GO:0044598|GO:0006693|GO:0044597|GO:0007603|GO:0001758|GO:0047017|GO:0005622|GO:0016488|GO:0047020|GO:0071395|GO:0034694|GO:0047023|GO:0047115|GO:0044259|GO:0004745|GO:0010942|GO:0070062|GO:0000060|GO:0045550|GO:1900053|GO:2000224|GO:0061370|GO:0004032|GO:0004033|GO:0048385|GO:0007186|GO:0071384|GO:0042448|GO:2000379|GO:0055114|GO:0051897|GO:0008284|GO:0047086|GO:0045703|GO:0005634|GO:…	5147848	chr10	5147789	+	hs|10p15.1	NM_003739	chr10:5147789-5147848	NM_003739	Hs.78183
A_33_P3590259	-3.75541	-1.90897	3.75541	down	chemokine (C-X-C motif) ligand 14	CXCL14	FALSE	Homo sapiens chemokine (C-X-C motif) ligand 14 (CXCL14), mRNA [NM_004887]	9547	GO:0008009|GO:0007165|GO:0048839|GO:0006955|GO:0005794|GO:0006935|GO:0060326|GO:0007267|GO:0005615	134907553	chr5	134907494	-	hs|5q31.1	NM_004887	chr5:134907553-134907494	NM_004887	Hs.483444
A_19_P00329731	-3.75502	-1.90882	3.75502	down			FALSE				33854329	chr1	33854270	-	hs|1p35.1		chr1:033854329-033854270
A_33_P3356070	-3.75356	-1.90826	3.75356	down	lipin 1	LPIN1	FALSE	Homo sapiens lipin 1 (LPIN1), transcript variant 3, mRNA [NM_001261428]	23175	GO:0006646|GO:0031965|GO:0006357|GO:0005634|GO:0044281|GO:0008195|GO:0006351|GO:0005829|GO:0009062|GO:0003674|GO:0005737|GO:0016311|GO:0019432|GO:0005789|GO:0006644|GO:0044255|GO:0006642|GO:0046474|GO:0006656	11964937	chr2	11964878	+	hs|2p25.1	NM_001261428	chr2:11964878-11964937	NM_001261428	Hs.467740
A_23_P128281	-3.75057	-1.90711	3.75057	down	killer cell lectin-like receptor subfamily C, member 3	KLRC3	FALSE	Homo sapiens killer cell lectin-like receptor subfamily C, member 3 (KLRC3), transcript variant 2, mRNA [NM_007333]	3823	GO:0007165|GO:0006968|GO:0030246|GO:0016021|GO:0004888	10569289	chr12	10568358	-	hs|12p13.2	NM_007333	chr12:10569289-10568358	NM_007333	Hs.654362
A_23_P503059	-3.74865	-1.90637	3.74865	down	contactin 5	CNTN5	FALSE	Homo sapiens contactin 5 (CNTN5), transcript variant 1, mRNA [NM_014361]	53942	GO:0005737|GO:0005886|GO:0007605|GO:0031225|GO:0007155	100226885	chr11	100221580	+	hs|11q22.1	NM_014361	chr11:100221580-100226885	NM_014361	Hs.656783
A_33_P3284129	-3.73158	-1.89979	3.73158	down	LY6/PLAUR domain containing 1	LYPD1	FALSE	Homo sapiens LY6/PLAUR domain containing 1 (LYPD1), transcript variant 1, mRNA [NM_144586]	116372	GO:0005886|GO:0031225	133402818	chr2	133402759	-	hs|2q21.2	NM_144586	chr2:133402818-133402759	NM_144586	Hs.432395
A_24_P389916	-3.72794	-1.89838	3.72794	down	leucine rich repeat containing 32	LRRC32	FALSE	Homo sapiens leucine rich repeat containing 32 (LRRC32), transcript variant 1, mRNA [NM_005512]	2615	GO:0010628|GO:0005887|GO:0046007|GO:0050710	76369017	chr11	76368958	-	hs|11q13.5	NM_005512	chr11:76369017-76368958	NM_005512	Hs.151641
A_33_P3263432	-3.72722	-1.8981	3.72722	down	integrin, alpha 10	ITGA10	FALSE	Homo sapiens integrin, alpha 10 (ITGA10), mRNA [NM_003637]	8515	GO:0008305|GO:0007160|GO:0005886|GO:0030198|GO:0007596|GO:0007411|GO:0007229|GO:0005518|GO:0046872	145543867	chr1	145543808	+	hs|1q21.1	NM_003637	chr1:145543808-145543867	NM_003637	Hs.158237
A_33_P3298105	-3.72492	-1.89721	3.72492	down	spermatogenesis associated 13	SPATA13	FALSE	Homo sapiens spermatogenesis associated 13 (SPATA13), transcript variant 3, mRNA [NM_001286792]	221178	GO:0005515|GO:0030334|GO:0030032|GO:0005730|GO:0005634|GO:0032587|GO:0030175|GO:0043087|GO:0030027|GO:0005085|GO:0005737|GO:0032314|GO:0016477|GO:0046847|GO:0030676	24877344	chr13	24877285	+	hs|13q12.12	NM_001286792	chr13:24877285-24877344	NM_001286792	Hs.595391
A_19_P00316242	-3.7247	-1.89712	3.7247	down	uncharacterized LOC101928858	LOC101928858	FALSE	PREDICTED: Homo sapiens uncharacterized LOC101928858 (RP11-434D9.1), transcript variant X3, ncRNA [XR_427726]	101928858		67100675	chr5	67100616	+	hs|5q13.1	XR_427726	chr5:67100616-67100675	XR_427726
A_23_P127948	-3.71543	-1.89353	3.71543	down	adrenomedullin	ADM	FALSE	Homo sapiens adrenomedullin (ADM), mRNA [NM_001124]	133	GO:0005515|GO:0008284|GO:0031700|GO:0008285|GO:2001214|GO:0006701|GO:0060712|GO:0031102|GO:0008015|GO:0060670|GO:0031100|GO:0030819|GO:0009409|GO:0007267|GO:0005615|GO:0007204|GO:0031623|GO:0007507|GO:0005737|GO:0048589|GO:0042594|GO:0045906|GO:0045909|GO:0032496|GO:0042475|GO:0006171|GO:0032868|GO:0001666|GO:0007565|GO:0043065|GO:0008209|GO:0007568|GO:0005102|GO:0009611|GO:0001843|GO:0051384|GO:…	10328839	chr11	10328780	+	hs|11p15.4	NM_001124	chr11:10328780-10328839	NM_001124	Hs.441047
A_33_P3234521	-3.71091	-1.89177	3.71091	down	DIS3 like exosome 3'-5' exoribonuclease	DIS3L	FALSE	DIS3 mitotic control homolog (S. cerevisiae)-like [Source:HGNC Symbol;Acc:28698] [ENST00000564909]	115752	GO:0005515|GO:0016075|GO:0000175|GO:0003723|GO:0000177|GO:0019899	66618880	chr15	66618821	+	hs|15q22.31	AK123202	chr15:66618821-66618880		Hs.446251
A_23_P342138	-3.6956	-1.88581	3.6956	down	ADAMTS-like 1	ADAMTSL1	FALSE	Homo sapiens ADAMTS-like 1 (ADAMTSL1), transcript variant 4, mRNA [NM_001040272]	92949	GO:0006508|GO:0005578|GO:0008270|GO:0008237	18910252	chr9	18910193	+	hs|9p22.1	NM_001040272	chr9:18910193-18910252	NM_001040272	Hs.741483
A_24_P200000	-3.68943	-1.8834	3.68943	down	STEAP family member 3, metalloreductase	STEAP3	FALSE	Homo sapiens STEAP family member 3, metalloreductase (STEAP3), transcript variant 1, mRNA [NM_182915]	55240	GO:0005515|GO:0009306|GO:0043065|GO:0000293|GO:0005886|GO:0005771|GO:0006915|GO:0055085|GO:0046872|GO:0006879|GO:0033572|GO:0007049|GO:0016021|GO:0010008|GO:0055114	120012423	chr2	120012364	+	hs|2q14.2	NM_182915	chr2:120012364-120012423	NM_182915	Hs.647822
A_23_P201551	-3.6777	-1.8788	3.6777	down	vav 3 guanine nucleotide exchange factor	VAV3	FALSE	Homo sapiens vav 3 guanine nucleotide exchange factor (VAV3), transcript variant 1, mRNA [NM_006113]	10451	GO:0050853|GO:0005515|GO:0005154|GO:0005886|GO:0007264|GO:0030890|GO:0030032|GO:0006906|GO:0046872|GO:0005829|GO:0005085|GO:0032314|GO:0043552|GO:0030676|GO:0070062|GO:0051056|GO:0048011|GO:0043065|GO:0042493|GO:0030168|GO:0009967|GO:0001525|GO:0097190|GO:0006974|GO:0045785|GO:0043547|GO:0016477|GO:0007596|GO:0007229|GO:0045087|GO:0005070|GO:0038096|GO:0038095|GO:0005096	108113896	chr1	108113837	-	hs|1p13.3	NM_006113	chr1:108113896-108113837	NM_006113	Hs.267659
A_24_P174793	-3.6646	-1.87366	3.6646	down	proprotein convertase subtilisin/kexin type 1	PCSK1	FALSE	Homo sapiens proprotein convertase subtilisin/kexin type 1 (PCSK1), transcript variant 1, mRNA [NM_000439]	5122	GO:0030133|GO:0005794|GO:0050796|GO:0016486|GO:0004252|GO:0043043|GO:0008152|GO:0007267|GO:0006508|GO:0044267|GO:0005615|GO:0034774	95726190	chr5	95726131	-	hs|5q15	NM_000439	chr5:95726190-95726131	NM_000439	Hs.78977
A_33_P3403107	-3.65521	-1.86995	3.65521	down	proline rich 19	PRR19	FALSE	Homo sapiens proline rich 19 (PRR19), mRNA [NM_199285]	284338		42814972	chr19	42814913	+	hs|19q13.2	NM_199285	chr19:42814913-42814972	NM_199285	Hs.585901
A_23_P56703	-3.65315	-1.86914	3.65315	down	TraB domain containing 2A	TRABD2A	FALSE	Homo sapiens TraB domain containing 2A (TRABD2A), transcript variant 1, mRNA [NM_001277053]	129293	GO:0017147|GO:0031301|GO:0005887|GO:0018158|GO:0008152|GO:0030178|GO:0006508|GO:0060322|GO:0016055|GO:0004222|GO:0046872	85049013	chr2	85048954	-	hs|2p11.2	NM_001277053	chr2:85049013-85048954	NM_001277053	Hs.469134
A_23_P40611	-3.64705	-1.86673	3.64705	down	transcobalamin II	TCN2	FALSE	Homo sapiens transcobalamin II (TCN2), transcript variant 1, mRNA [NM_000355]	6948	GO:0015889|GO:0009235|GO:0031419|GO:0006767|GO:0005576|GO:0044281|GO:0005615|GO:0046872|GO:0006766|GO:0005768|GO:0006824|GO:0043202|GO:0070062	31013343	chr22	31011742	+	hs|22q12.2	NM_000355	chr22:31011742-31013343	NM_000355	Hs.417948
A_19_P00809229	-3.64116	-1.8644	3.64116	down			FALSE				3184507	chr2	3184448	+	hs|2p25.3		chr2:003184448-003184507
A_33_P3292525	-3.64006	-1.86396	3.64006	down	transmembrane protein 201	TMEM201	FALSE	Homo sapiens transmembrane protein 201 (TMEM201), transcript variant 2, mRNA [NM_001010866]	199953	GO:0005637|GO:0016021	9664987	chr1	9664928	+	hs|1p36.22	NM_001010866	chr1:9664928-9664987	NM_001010866	Hs.632365
A_33_P3225512	-3.63794	-1.86312	3.63794	down	2'-5'-oligoadenylate synthetase 2, 69/71kDa	OAS2	FALSE	Homo sapiens 2'-5'-oligoadenylate synthetase 2, 69/71kDa (OAS2), transcript variant 2, mRNA [NM_002535]	4939	GO:0003725|GO:0048471|GO:0018377|GO:0005783|GO:0001730|GO:0019221|GO:0005634|GO:0009615|GO:0005524|GO:0046872|GO:0043231|GO:0005829|GO:0006401|GO:0005739|GO:0051607|GO:0005737|GO:0006139|GO:0060337|GO:0016020|GO:0006486|GO:0008270|GO:0060333|GO:0006164	113448488	chr12	113448429	+	hs|12q24.13	NM_002535	chr12:113448429-113448488	NM_002535	Hs.414332
A_23_P383278	-3.63104	-1.86038	3.63104	down	pyrroline-5-carboxylate reductase-like	PYCRL	FALSE	Homo sapiens pyrroline-5-carboxylate reductase-like (PYCRL), mRNA [NM_023078]	65263	GO:0055129|GO:0055114|GO:0042802|GO:0004735	144686701	chr8	144686642	-	hs|8q24.3	NM_023078	chr8:144686701-144686642	NM_023078	Hs.165186
A_23_P129486	-3.62838	-1.85933	3.62838	down	methionine sulfoxide reductase B1	MSRB1	FALSE	Homo sapiens methionine sulfoxide reductase B1 (MSRB1), mRNA [NM_016332]	51734	GO:0030091|GO:0003779|GO:0005634|GO:0005575|GO:0015629|GO:0005737|GO:0045087|GO:0033743|GO:0030041|GO:0008270|GO:0070191|GO:0006979|GO:0055114	1988536	chr16	1988477	-	hs|16p13.3	NM_016332	chr16:1988536-1988477	NM_016332	Hs.655346
A_24_P40721	-3.6251	-1.85802	3.6251	down	serine palmitoyltransferase, long chain base subunit 3	SPTLC3	FALSE	Homo sapiens serine palmitoyltransferase, long chain base subunit 3 (SPTLC3), mRNA [NM_018327]	55304	GO:0006665|GO:0046520|GO:0004758|GO:0030148|GO:0030170|GO:0005789|GO:0044281|GO:0016021|GO:0017059	13055059	chr20	13055000	+	hs|20p12.1	NM_018327	chr20:13055000-13055059	NM_018327	Hs.425023
A_32_P453321	-3.62435	-1.85772	3.62435	down	chromosome 1 open reading frame 228	C1orf228	FALSE	Homo sapiens chromosome 1 open reading frame 228 (C1orf228), mRNA [NM_001145636]	339541		45191083	chr1	45191024	+	hs|1p34.1	NM_001145636	chr1:45191024-45191083	NM_001145636	Hs.173679
A_33_P3228460	-3.62382	-1.85751	3.62382	down	FXYD domain containing ion transport regulator 3	FXYD3	FALSE	Homo sapiens FXYD domain containing ion transport regulator 3 (FXYD3), transcript variant 3, mRNA [NM_001136007]	5349	GO:0006821|GO:0050790|GO:0034220|GO:0005886|GO:0005887|GO:0034707|GO:0005789|GO:0051117|GO:0055085|GO:0005254|GO:0070062	35614531	chr19	35614472	+	hs|19q13.12	NM_001136007	chr19:35614472-35614531	NM_001136007	Hs.301350
A_23_P252062	-3.61481	-1.85392	3.61481	down	peroxisome proliferator-activated receptor gamma	PPARG	FALSE	Homo sapiens peroxisome proliferator-activated receptor gamma (PPARG), transcript variant 3, mRNA [NM_138711]	5468	GO:0005515|GO:0010467|GO:0043627|GO:0030308|GO:0006367|GO:0003700|GO:0050544|GO:0044212|GO:0033189|GO:0009409|GO:0003707|GO:0007507|GO:0042953|GO:0004879|GO:0019395|GO:0032869|GO:0010745|GO:0046321|GO:0000122|GO:0001890|GO:0002674|GO:0045165|GO:0050872|GO:0007186|GO:0045087|GO:0045600|GO:0008270|GO:0005654|GO:0045893|GO:0001012|GO:0015909|GO:0019899|GO:0045892|GO:0006629|GO:0031100|GO:0033993|GO:…	12458558	chr3	12458499	+	hs|3p25.2	NM_138711	chr3:12458499-12458558	NM_138711	Hs.162646
A_33_P3299590	-3.60987	-1.85195	3.60987	down	serrate, RNA effector molecule	SRRT	FALSE	Homo sapiens serrate, RNA effector molecule (SRRT), transcript variant 5, mRNA [NM_001128854]	51593	GO:0097150|GO:0005515|GO:0046685|GO:0006355|GO:0005737|GO:0008283|GO:0031053|GO:0005654|GO:0003677|GO:0006351	100479860	chr7	100479801	+	hs|7q22.1	NM_001128854	chr7:100479801-100479860	NM_001128854	Hs.111801
A_24_P84970	-3.59989	-1.84795	3.59989	down			FALSE				108925054	chr5	108924995	+	hs|5q21.3		chr5:108924995-108925054
A_33_P3423941	-3.59367	-1.84546	3.59367	down	interferon induced transmembrane protein 1	IFITM1	FALSE	Homo sapiens interferon induced transmembrane protein 1 (IFITM1), mRNA [NM_003641]	8519	GO:0005515|GO:0030336|GO:0008285|GO:0005886|GO:0035456|GO:0019221|GO:0035455|GO:0009615|GO:0045669|GO:0035556|GO:0051607|GO:0060337|GO:0001503|GO:0046597|GO:0050776|GO:0005057|GO:0016021|GO:0034341|GO:0007166|GO:0045071	315113	chr11	315054	+	hs|11p15.5	NM_003641	chr11:315054-315113	NM_003641	Hs.458414
A_24_P192727	-3.59252	-1.845	3.59252	down	Kazal-type serine peptidase inhibitor domain 1	KAZALD1	FALSE	Kazal-type serine peptidase inhibitor domain 1 [Source:HGNC Symbol;Acc:25460] [ENST00000465807]	81621	GO:0001503|GO:0030198|GO:0007275|GO:0005614|GO:0001558|GO:0030154|GO:0005520	102827795	chr10	102827736	+	hs|10q24.31	XM_005270193	chr10:102827736-102827795	XM_005270193	Hs.632079
A_33_P3394489	-3.5913	-1.84451	3.5913	down	CHKB antisense RNA 1 (head to head)	CHKB-AS1	FALSE	Homo sapiens CHKB antisense RNA 1 (head to head) (CHKB-AS1), transcript variant 2, long non-coding RNA [NR_021492]	100144603		51022166	chr22	51022107	+	hs|22q13.33	NR_021492	chr22:51022107-51022166	NR_021492	Hs.657275
A_33_P3346966	-3.58854	-1.8434	3.58854	down	sperm associated antigen 16	SPAG16	FALSE	Homo sapiens sperm associated antigen 16 (SPAG16), transcript variant 1, mRNA [NM_024532]	79582	GO:0042384|GO:0019901|GO:0005930|GO:0005874|GO:0005634|GO:0007283	215013989	chr2	215013930	+	hs|2q34	NM_024532	chr2:215013930-215013989	NM_024532	Hs.743365
A_23_P9523	-3.57651	-1.83855	3.57651	down	ribokinase	RBKS	FALSE	Homo sapiens ribokinase (RBKS), transcript variant 1, mRNA [NM_022128]	64080	GO:0019303|GO:0046835|GO:0004747|GO:0005524|GO:0070062	28004544	chr2	28004485	-	hs|2p23.2	NM_022128	chr2:28004544-28004485	NM_022128	Hs.11916
A_32_P305888	-3.57186	-1.83668	3.57186	down	SH3 domain and tetratricopeptide repeats 2	SH3TC2	FALSE	Homo sapiens SH3 domain and tetratricopeptide repeats 2 (SH3TC2), mRNA [NM_024577]	79628	GO:0008219|GO:0005886|GO:0033157|GO:0031410|GO:0055037|GO:0032287	148381027	chr5	148380968	-	hs|5q32	NM_024577	chr5:148381027-148380968	NM_024577	Hs.483784
A_33_P3336557	-3.57179	-1.83665	3.57179	down			FALSE				197387558	chr3	197387499	-	hs|3q29		chr3:197387558-197387499
A_23_P6344	-3.56798	-1.83511	3.56798	down	stromal cell-derived factor 2-like 1	SDF2L1	FALSE	Homo sapiens stromal cell-derived factor 2-like 1 (SDF2L1), mRNA [NM_022044]	23753	GO:0016020|GO:0005788	21998570	chr22	21998511	+	hs|22q11.21	NM_022044	chr22:21998511-21998570	NM_022044	Hs.303116
A_33_P3350726	-3.56496	-1.83388	3.56496	down	peroxisome proliferator-activated receptor gamma	PPARG	FALSE	Homo sapiens peroxisome proliferator-activated receptor gamma (PPARG), transcript variant 3, mRNA [NM_138711]	5468	GO:0005515|GO:0010467|GO:0043627|GO:0030308|GO:0006367|GO:0003700|GO:0050544|GO:0044212|GO:0033189|GO:0009409|GO:0003707|GO:0007507|GO:0042953|GO:0004879|GO:0019395|GO:0032869|GO:0010745|GO:0046321|GO:0000122|GO:0001890|GO:0002674|GO:0045165|GO:0050872|GO:0007186|GO:0045087|GO:0045600|GO:0008270|GO:0005654|GO:0045893|GO:0001012|GO:0015909|GO:0019899|GO:0045892|GO:0006629|GO:0031100|GO:0033993|GO:…	12434187	chr3	12434128	+	hs|3p25.2	NM_138711	chr3:12434128-12434187	NM_138711	Hs.162646
A_33_P3419970	-3.56482	-1.83383	3.56482	down	neuropeptide B	NPB	FALSE	Homo sapiens neuropeptide B (NPB), mRNA [NM_148896]	256933	GO:0005515|GO:0001664|GO:0007186|GO:0007218|GO:0005576	79860776	chr17	79860717	+	hs|17q25.3	NM_148896	chr17:79860717-79860776	NM_148896	Hs.708916
A_23_P23996	-3.56361	-1.83334	3.56361	down	methionine adenosyltransferase I, alpha	MAT1A	FALSE	Homo sapiens methionine adenosyltransferase I, alpha (MAT1A), mRNA [NM_000429]	4143	GO:0034641|GO:0006520|GO:0006805|GO:0000096|GO:0006556|GO:0044281|GO:0032259|GO:0006730|GO:0005524|GO:0004478|GO:0046872|GO:0005829	82031792	chr10	82031733	-	hs|10q23.1	NM_000429	chr10:82031792-82031733	NM_000429	Hs.282670
A_33_P3386547	-3.54506	-1.82581	3.54506	down	sphingosine-1-phosphate phosphatase 2	SGPP2	FALSE	Homo sapiens sphingosine-1-phosphate phosphatase 2 (SGPP2), mRNA [NM_152386]	130367	GO:0042392|GO:0006665|GO:0005783|GO:0030148|GO:0016311|GO:0006670|GO:0005789|GO:0044281|GO:0016021	223423593	chr2	223423534	+	hs|2q36.1	NM_152386	chr2:223423534-223423593	NM_152386	Hs.591604
A_33_P3233580	-3.53466	-1.82157	3.53466	down	KIAA1217	KIAA1217	FALSE	Homo sapiens KIAA1217 (KIAA1217), transcript variant 6, mRNA [NM_001282769]	56243	GO:0003674|GO:0005737|GO:0048706	24834221	chr10	24834162	+	hs|10p12.1	NM_001282769	chr10:24834162-24834221	NM_001282769	Hs.445885
A_23_P33326	-3.53448	-1.8215	3.53448	down	adrenoceptor alpha 1B	ADRA1B	FALSE	Homo sapiens adrenoceptor alpha 1B (ADRA1B), mRNA [NM_000679]	147	GO:0005886|GO:0008283|GO:0007267|GO:0048148|GO:0005634|GO:0007512|GO:0019229|GO:0035556|GO:0001987|GO:0035265|GO:0007626|GO:0004937|GO:0031965|GO:0046982|GO:0007275|GO:0043278|GO:0042593|GO:0001996|GO:0045818|GO:0001975|GO:0045819|GO:0007186|GO:0005887|GO:0001974|GO:0001997|GO:0008542|GO:0055117|GO:0071875|GO:0016049|GO:0007188|GO:0043410	159400002	chr5	159399943	+	hs|5q33.3	NM_000679	chr5:159399943-159400002	NM_000679	Hs.368632
A_23_P256084	-3.53135	-1.82022	3.53135	down	arylsulfatase E (chondrodysplasia punctata 1)	ARSE	FALSE	Homo sapiens arylsulfatase E (chondrodysplasia punctata 1) (ARSE), transcript variant 2, mRNA [NM_000047]	415	GO:0006665|GO:0001501|GO:0006687|GO:0005795|GO:0005788|GO:0004065|GO:0044281|GO:0044267|GO:0046872|GO:0070062|GO:0043687	2854805	chrX	2853195	-	hs|Xp22.33	NM_000047	chrX:2854805-2853195	NM_000047	Hs.386975
A_23_P130906	-3.52976	-1.81957	3.52976	down	testis expressed 101	TEX101	FALSE	Homo sapiens testis expressed 101 (TEX101), transcript variant 1, mRNA [NM_031451]	83639	GO:0005886|GO:0031225|GO:0002080	43922585	chr19	43922526	+	hs|19q13.31	NM_031451	chr19:43922526-43922585	NM_031451	Hs.97978
A_23_P150693	-3.52701	-1.81845	3.52701	down	four jointed box 1 (Drosophila)	FJX1	FALSE	Homo sapiens four jointed box 1 (Drosophila) (FJX1), mRNA [NM_014344]	24147	GO:0005615	35642168	chr11	35642109	+	hs|11p13	NM_014344	chr11:35642109-35642168	NM_014344	Hs.39384
A_23_P216340	-3.52215	-1.81646	3.52215	down	Src-like-adaptor	SLA	FALSE	Homo sapiens Src-like-adaptor (SLA), transcript variant 1, mRNA [NM_001045556]	6503	GO:0005515|GO:0005070|GO:0009967|GO:0005768	134049150	chr8	134049091	-	hs|8q24.22	NM_001045556	chr8:134049150-134049091	NM_001045556	Hs.75367
A_32_P110390	-3.5205	-1.81578	3.5205	down	transmembrane protein 171	TMEM171	FALSE	Homo sapiens transmembrane protein 171 (TMEM171), transcript variant 1, mRNA [NM_173490]	134285	GO:0016021	72424345	chr5	72424286	+	hs|5q13.2	NM_173490	chr5:72424286-72424345	NM_173490	Hs.162246
A_33_P3281667	-3.51789	-1.81471	3.51789	down	contactin associated protein-like 3B	CNTNAP3B	FALSE	Homo sapiens contactin associated protein-like 3B (CNTNAP3B), mRNA [NM_001201380]	728577	GO:0016021|GO:0007155	43920471	chr9	43920412	+	hs|9p11.2	NM_001201380	chr9:43920412-43920471	NM_001201380	Hs.521495
A_23_P28857	-3.5113	-1.81201	3.5113	down	signal-regulatory protein gamma	SIRPG	FALSE	Homo sapiens signal-regulatory protein gamma (SIRPG), transcript variant 1, mRNA [NM_018556]	55423	GO:0005515|GO:0008284|GO:0008285|GO:0022409|GO:0005886|GO:0007267|GO:0050900|GO:0035556|GO:0016020|GO:0007596|GO:0050870|GO:0016021|GO:0007155	1609978	chr20	1609919	-	hs|20p13	NM_018556	chr20:1609978-1609919	NM_018556	Hs.590883
A_33_P3213822	-3.51043	-1.81165	3.51043	down	potassium channel, subfamily K, member 2	KCNK2	FALSE	Homo sapiens potassium channel, subfamily K, member 2 (KCNK2), transcript variant 1, mRNA [NM_001017424]	3776	GO:0015271|GO:0007186|GO:0005886|GO:0005783|GO:0008076|GO:0019870|GO:0005789|GO:0007268|GO:0034765|GO:0022841|GO:0071805	215410411	chr1	215410352	+	hs|1q41	NM_001017424	chr1:215410352-215410411	NM_001017424	Hs.497745
A_33_P3365995	-3.50542	-1.80959	3.50542	down	microtubule associated serine/threonine kinase family member 4	MAST4	FALSE	Homo sapiens microtubule associated serine/threonine kinase family member 4 (MAST4), transcript variant 4, mRNA [NM_001290226]	375449	GO:0005737|GO:0000287|GO:0004674|GO:0006468|GO:0005524	66255072	chr5	66255013	+	hs|5q12.3	NM_001290226	chr5:66255013-66255072	NM_001290226	Hs.595458
A_19_P00812504	-3.50507	-1.80944	3.50507	down			FALSE				26936226	chr21	26936167	+	hs|21q21.3		chr21:026936167-026936226
A_33_P3409154	-3.49548	-1.80549	3.49548	down	solute carrier family 22, member 23	SLC22A23	FALSE	Homo sapiens solute carrier family 22, member 23 (SLC22A23), transcript variant 1, mRNA [NM_015482]	63027	GO:0022857|GO:0016021|GO:0055085|GO:0006811	3273134	chr6	3273075	-	hs|6p25.2	NM_015482	chr6:3273134-3273075	NM_015482	Hs.713588
A_24_P92472	-3.48745	-1.80217	3.48745	down	complement factor I	CFI	FALSE	Homo sapiens complement factor I (CFI), mRNA [NM_000204]	3426	GO:0030449|GO:0016020|GO:0004252|GO:0045087|GO:0006958|GO:0006508|GO:0005576|GO:0005615|GO:0046872|GO:0006898|GO:0070062|GO:0005044	110670715	chr4	110670656	-	hs|4q25	NM_000204	chr4:110670715-110670656	NM_000204	Hs.312485
A_23_P365060	-3.48603	-1.80158	3.48603	down	MDN1, midasin homolog (yeast)	MDN1	FALSE	Homo sapiens MDN1, midasin homolog (yeast) (MDN1), mRNA [NM_014611]	23195	GO:0005515|GO:0005737|GO:0006461|GO:0006200|GO:0005730|GO:0005634|GO:0051082|GO:0045111|GO:0016887|GO:0005524	90354780	chr6	90353900	-	hs|6q15	NM_014611	chr6:90354780-90353900	NM_014611	Hs.529948
A_24_P90900	-3.47361	-1.79644	3.47361	down	chymotrypsin-like	CTRL	FALSE	Homo sapiens chymotrypsin-like (CTRL), mRNA [NM_001907]	1506	GO:0004252|GO:0007586|GO:0006508|GO:0005615	67964417	chr16	67964358	-	hs|16q22.1	NM_001907	chr16:67964417-67964358	NM_001907	Hs.654546
A_23_P468	-3.45606	-1.78913	3.45606	down	coiled-coil domain containing 181	CCDC181	FALSE	Homo sapiens coiled-coil domain containing 181 (CCDC181), mRNA [NM_021179]	57821	GO:0005730|GO:0005634	169390697	chr1	169390638	-	hs|1q24.2	NM_021179	chr1:169390697-169390638	NM_021179	Hs.567557
A_23_P45799	-3.44634	-1.78506	3.44634	down	origin recognition complex, subunit 1	ORC1	FALSE	Homo sapiens origin recognition complex, subunit 1 (ORC1), transcript variant 1, mRNA [NM_004153]	4998	GO:0005515|GO:0017111|GO:0000808|GO:0005886|GO:0005730|GO:0005634|GO:0003677|GO:0005524|GO:0005829|GO:0006260|GO:0000082|GO:0005737|GO:0000083|GO:0006270|GO:0003682|GO:0005654|GO:0005664|GO:0000278	52840560	chr1	52840501	-	hs|1p32.3	NM_004153	chr1:52840560-52840501	NM_004153	Hs.17908
A_23_P108501	-3.44078	-1.78274	3.44078	down	EPH receptor A4	EPHA4	FALSE	Homo sapiens EPH receptor A4 (EPHA4), mRNA [NM_004438]	2043	GO:0005515|GO:0030424|GO:0097161|GO:0030054|GO:0031594|GO:0008347|GO:0005783|GO:0005741|GO:0030175|GO:0030425|GO:0042802|GO:0005005|GO:0005737|GO:0005004|GO:0046777|GO:0032314|GO:0048681|GO:0043197|GO:0045211|GO:0007628|GO:0043204|GO:0043679|GO:0043507|GO:0061001|GO:0007155|GO:0097156|GO:0097155|GO:0032317|GO:0005794|GO:0048013|GO:0009986|GO:0021957|GO:2001108|GO:0014069|GO:0018108|GO:0044295|GO:…	222290776	chr2	222290717	-	hs|2q36.1	NM_004438	chr2:222290776-222290717	NM_004438	Hs.371218
A_23_P166797	-3.43459	-1.78014	3.43459	down	receptor (chemosensory) transporter protein 4	RTP4	FALSE	Homo sapiens receptor (chemosensory) transporter protein 4 (RTP4), mRNA [NM_022147]	64108	GO:0005515|GO:0005737|GO:0006612|GO:0016021|GO:0001580	187089314	chr3	187089255	+	hs|3q27.3	NM_022147	chr3:187089255-187089314	NM_022147	Hs.43388
A_33_P3246623	-3.43268	-1.77934	3.43268	down	coiled-coil domain containing 18	CCDC18	FALSE	Homo sapiens coiled-coil domain containing 18 (CCDC18), mRNA [NM_206886]	343099		93744270	chr1	93744211	+	hs|1p22.1	NM_206886	chr1:93744211-93744270	NM_206886	Hs.745125
A_23_P216023	-3.42826	-1.77748	3.42826	down	angiopoietin 1	ANGPT1	FALSE	Homo sapiens angiopoietin 1 (ANGPT1), transcript variant 1, mRNA [NM_001146]	284	GO:0051897|GO:0005886|GO:0072012|GO:0050731|GO:0002040|GO:0050900|GO:0005615|GO:0030154|GO:0007171|GO:0033138|GO:0043524|GO:0031398|GO:0070374|GO:0070062|GO:0030097|GO:0030971|GO:0043066|GO:0048014|GO:0031589|GO:0014068|GO:0005576|GO:0001701|GO:0050918|GO:0045785|GO:0010595|GO:0043536|GO:0005902|GO:0007162|GO:0007596|GO:0001936|GO:0034394|GO:0045121|GO:0014842|GO:2000352|GO:0002092|GO:0043116|GO:…	108262371	chr8	108262312	-	hs|8q23.1	NM_001146	chr8:108262371-108262312	NM_001146	Hs.369675
A_33_P3417313	-3.423	-1.77526	3.423	down	pyrroline-5-carboxylate reductase-like	PYCRL	FALSE	Homo sapiens pyrroline-5-carboxylate reductase-like (PYCRL), mRNA [NM_023078]	65263	GO:0055129|GO:0055114|GO:0042802|GO:0004735	144688011	chr8	144687952	-	hs|8q24.3	NM_023078	chr8:144688011-144687952	NM_023078	Hs.165186
A_33_P3267081	-3.41401	-1.77147	3.41401	down	zinc finger protein 771	ZNF771	FALSE	Homo sapiens zinc finger protein 771 (ZNF771), transcript variant 1, mRNA [NM_016643]	51333	GO:0006355|GO:0005634|GO:0003677|GO:0046872|GO:0006351	30429915	chr16	30429856	+	hs|16p11.2	NM_016643	chr16:30429856-30429915	NM_016643	Hs.148584
A_23_P6615	-3.41185	-1.77055	3.41185	down	carboxypeptidase B1 (tissue)	CPB1	FALSE	Homo sapiens carboxypeptidase B1 (tissue) (CPB1), mRNA [NM_001871]	1360	GO:0006508|GO:0004180|GO:0008270|GO:0005576|GO:0004181	148563380	chr3	148563321	+	hs|3q24	NM_001871	chr3:148563321-148563380	NM_001871	Hs.477891
A_33_P3283480	-3.40466	-1.76751	3.40466	down	cathepsin C	CTSC	FALSE	Homo sapiens cathepsin C (CTSC), transcript variant 2, mRNA [NM_148170]	1075	GO:0005515|GO:0031404|GO:0005794|GO:0010033|GO:0004252|GO:0019902|GO:0005783|GO:2001235|GO:0007568|GO:0051087|GO:0006915|GO:0043621|GO:0005615|GO:0005764|GO:0042802|GO:0016505|GO:0006955|GO:0001913|GO:0006508|GO:0008234|GO:0070062	88054087	chr11	88054028	-	hs|11q14.2	NM_148170	chr11:88054087-88054028	NM_148170	Hs.128065
A_23_P118203	-3.40286	-1.76675	3.40286	down	zymogen granule protein 16B	ZG16B	FALSE	Homo sapiens zymogen granule protein 16B (ZG16B), mRNA [NM_145252]	124220	GO:0003674|GO:0001895|GO:0005615|GO:0070062	2882172	chr16	2882113	+	hs|16p13.3	NM_145252	chr16:2882113-2882172	NM_145252	Hs.105887
A_23_P143885	-3.39051	-1.7615	3.39051	down	Rho guanine nucleotide exchange factor (GEF) 3	ARHGEF3	FALSE	Homo sapiens Rho guanine nucleotide exchange factor (GEF) 3 (ARHGEF3), transcript variant 3, mRNA [NM_019555]	50650	GO:0005622|GO:0051056|GO:0048011|GO:0043065|GO:0007264|GO:0007266|GO:0032319|GO:0005089|GO:0097190|GO:0005829	56762170	chr3	56762111	-	hs|3p14.3	NM_019555	chr3:56762170-56762111	NM_019555	Hs.476402
A_33_P3403117	-3.39039	-1.76145	3.39039	down	nuclear receptor subfamily 2, group F, member 1	NR2F1	FALSE	Homo sapiens nuclear receptor subfamily 2, group F, member 1 (NR2F1), mRNA [NM_005654]	7025	GO:0005515|GO:0010467|GO:0003700|GO:0006367|GO:0003713|GO:0003707|GO:0044323|GO:0005634|GO:0000122|GO:0043565|GO:0007165|GO:0021796|GO:0045944|GO:0043401|GO:0010977|GO:0005654|GO:0008270|GO:0004879|GO:0001764|GO:0030522	92929776	chr5	92929717	+	hs|5q15	NM_005654	chr5:92929717-92929776	NM_005654	Hs.519445
A_23_P146830	-3.3876	-1.76026	3.3876	down	solute carrier family 25 (mitochondrial carrier; dicarboxylate transporter), member 10	SLC25A10	FALSE	Homo sapiens solute carrier family 25 (mitochondrial carrier; dicarboxylate transporter), member 10 (SLC25A10), transcript variant 2, mRNA [NM_012140]	1468	GO:0005515|GO:0005310|GO:0005975|GO:0005743|GO:0006094|GO:0005634|GO:0044281|GO:0055085|GO:0034641|GO:0000096|GO:0000098|GO:0006006|GO:0006835|GO:0016021|GO:0070221|GO:0006839|GO:0006811	79687584	chr17	79687525	+	hs|17q25.3	NM_012140	chr17:79687525-79687584	NM_012140	Hs.548187
A_19_P00808704	-3.37876	-1.75649	3.37876	down			FALSE				56023353	chr14	56023294	-	hs|14q22.3		chr14:056023353-056023294
A_23_P356004	-3.37679	-1.75565	3.37679	down	Kv channel interacting protein 3, calsenilin	KCNIP3	FALSE	Homo sapiens Kv channel interacting protein 3, calsenilin (KCNIP3), transcript variant 1, mRNA [NM_013434]	30818	GO:0005886|GO:0005783|GO:0015459|GO:0005634|GO:0006886|GO:0030425|GO:0005829|GO:0043523|GO:0032993|GO:0034765|GO:0043679|GO:0071805|GO:0005794|GO:0005244|GO:0006357|GO:0003714|GO:0005509|GO:0005267|GO:0006915|GO:0000122|GO:0008022|GO:0003677|GO:0006351|GO:0019233|GO:0044325|GO:0043565|GO:0007165|GO:0048266|GO:0048306	96051825	chr2	96051766	+	hs|2q11.1	NM_013434	chr2:96051766-96051825	NM_013434	Hs.437376
A_23_P140527	-3.37105	-1.7532	3.37105	down	forkhead box B1	FOXB1	FALSE	Homo sapiens forkhead box B1 (FOXB1), mRNA [NM_012182]	27023	GO:0007389|GO:0006366|GO:0021510|GO:0033504|GO:0061379|GO:0003705|GO:0001756|GO:0001655|GO:0005634|GO:0061377|GO:0048513|GO:0061374|GO:0021794|GO:0051090|GO:0022029|GO:0007412|GO:0043524|GO:0061381|GO:0003690|GO:0009888|GO:0005667|GO:0008301|GO:0000122|GO:0021855|GO:0021767|GO:0043565|GO:0007595|GO:0008542|GO:0030901|GO:0061030|GO:0008134	60297967	chr15	60297908	+	hs|15q22.2	NM_012182	chr15:60297908-60297967	NM_012182	Hs.734475
A_23_P215484	-3.36039	-1.74863	3.36039	down	chemokine (C-C motif) ligand 26	CCL26	FALSE	Homo sapiens chemokine (C-C motif) ligand 26 (CCL26), mRNA [NM_006072]	10344	GO:0008009|GO:0007165|GO:0006955|GO:0030335|GO:0006954|GO:0030838|GO:0006935|GO:0001938|GO:0060326|GO:0007267|GO:0032855|GO:0005615	75401219	chr7	75399061	-	hs|7q11.23	NM_006072	chr7:75401219-75399061	NM_006072	Hs.131342
A_23_P118427	-3.35913	-1.74809	3.35913	down	mitogen-activated protein kinase kinase 3	MAP2K3	FALSE	Homo sapiens mitogen-activated protein kinase kinase 3 (MAP2K3), transcript variant B, mRNA [NM_145109]	5606	GO:0005515|GO:0034142|GO:0060048|GO:0051403|GO:0005829|GO:0002756|GO:0000187|GO:0005737|GO:0006954|GO:0004702|GO:0002755|GO:0045860|GO:0034138|GO:0004708|GO:0038124|GO:0019901|GO:0038123|GO:0034134|GO:0018108|GO:0002224|GO:0005524|GO:0042035|GO:0007165|GO:0045087|GO:0005654|GO:0034166|GO:0035666|GO:0004713|GO:0045893|GO:0034146|GO:0034162	21218047	chr17	21217988	+	hs|17p11.2	NM_145109	chr17:21217988-21218047	NM_145109	Hs.514012
A_24_P382187	-3.35908	-1.74807	3.35908	down	insulin-like growth factor binding protein 4	IGFBP4	FALSE	Homo sapiens insulin-like growth factor binding protein 4 (IGFBP4), mRNA [NM_001552]	3487	GO:0008283|GO:0005576|GO:0006259|GO:0001558|GO:0005615|GO:0010906|GO:0007165|GO:0001501|GO:0044342|GO:0006954|GO:0043568|GO:0043410|GO:0044267|GO:0005520	38613367	chr17	38613308	+	hs|17q21.2	NM_001552	chr17:38613308-38613367	NM_001552	Hs.462998
A_23_P75063	-3.35694	-1.74715	3.35694	down	DPY30 domain containing 2	DYDC2	FALSE	Homo sapiens DPY30 domain containing 2 (DYDC2), transcript variant 1, mRNA [NM_032372]	84332		82126758	chr10	82126699	+	hs|10q23.1	NM_032372	chr10:82126699-82126758	NM_032372	Hs.741500
A_33_P3241269	-3.35688	-1.74712	3.35688	down	carboxylesterase 1	CES1	FALSE	Homo sapiens carboxylesterase 1 (CES1), transcript variant 1, mRNA [NM_001025195]	1066	GO:0052689|GO:0030855|GO:0008152|GO:0009636|GO:0005788|GO:0047374	55836823	chr16	55836764	-	hs|16q12.2	NM_001025195	chr16:55836823-55836764	NM_001025195	Hs.558865
A_19_P00809154	-3.34168	-1.74057	3.34168	down			FALSE				27934024	chr1	27933965	+	hs|1p36.11		chr1:027933965-027934024
A_19_P00812742	-3.33959	-1.73967	3.33959	down			FALSE	Q5VW30_HUMAN (Q5VW30) Nuclear factor 1 (CCAAT-box binding transcription factor) (CTF) (NF-I) (TGGCA-binding protein) (NF1) (NFI), partial (98%) [THC2552061]			14322185	chr9	14322126	-	hs|9p22.3		chr9:014322185-014322126
A_33_P3287770	-3.32785	-1.73459	3.32785	down	telomere maintenance 2	TELO2	FALSE	Homo sapiens telomere maintenance 2 (TELO2), mRNA [NM_016111]	9894	GO:0005622|GO:0005515|GO:0032006|GO:0032947|GO:0005737|GO:0000781|GO:0031931|GO:0016020|GO:0005634|GO:0031932|GO:0032403	1560451	chr16	1560392	+	hs|16p13.3	NM_016111	chr16:1560392-1560451	NM_016111	Hs.271044
A_23_P73763	-3.32065	-1.73146	3.32065	down	L antigen family, member 3	LAGE3	FALSE	Homo sapiens L antigen family, member 3 (LAGE3), mRNA [NM_006014]	8270	GO:0008150|GO:0003674|GO:0005634|GO:0005575|GO:0008033	153706252	chrX	153706193	-	hs|Xq28	NM_006014	chrX:153706252-153706193	NM_006014	Hs.444619
A_23_P83134	-3.31743	-1.73006	3.31743	down	growth arrest-specific 1	GAS1	FALSE	Homo sapiens growth arrest-specific 1 (GAS1), mRNA [NM_002048]	2619	GO:0005515|GO:0035924|GO:0030308|GO:0005886|GO:0060628|GO:0050680|GO:0048592|GO:0045879|GO:0048701|GO:0045880|GO:0048589|GO:0007411|GO:2001240|GO:0042476|GO:0060021|GO:0021904|GO:0007050|GO:0042474|GO:0043010|GO:0042473|GO:0046658|GO:0050679|GO:0043066|GO:0021587|GO:0002053|GO:0042981|GO:0012501|GO:0045165|GO:0008589|GO:0045930|GO:0016021|GO:0010955|GO:0042733	89559953	chr9	89559894	-	hs|9q21.33	NM_002048	chr9:89559953-89559894	NM_002048	Hs.65029
A_24_P380567	-3.31731	-1.73001	3.31731	down	calneuron 1	CALN1	FALSE	Homo sapiens calneuron 1 (CALN1), transcript variant 1, mRNA [NM_031468]	83698	GO:0048471|GO:0005886|GO:0005509|GO:0016021|GO:0032588	71275474	chr7	71275415	-	hs|7q11.22	NM_031468	chr7:71275474-71275415	NM_031468	Hs.592750
A_32_P83784	-3.31677	-1.72978	3.31677	down	ArfGAP with RhoGAP domain, ankyrin repeat and PH domain 2	ARAP2	FALSE	Homo sapiens ArfGAP with RhoGAP domain, ankyrin repeat and PH domain 2 (ARAP2), mRNA [NM_015230]	116984	GO:0043547|GO:0051056|GO:0008060|GO:0032312|GO:0007264|GO:0005547|GO:0008270|GO:0005829	36068160	chr4	36068101	-	hs|4p14	NM_015230	chr4:36068160-36068101	NM_015230	Hs.479451
A_23_P167599	-3.31318	-1.72822	3.31318	down	family with sequence similarity 134, member B	FAM134B	FALSE	Homo sapiens family with sequence similarity 134, member B (FAM134B), transcript variant 1, mRNA [NM_001034850]	54463	GO:0005801|GO:0005794|GO:0016021|GO:0019233	16473404	chr5	16473345	-	hs|5p15.1	NM_001034850	chr5:16473404-16473345	NM_001034850	Hs.481704
A_23_P93524	-3.31213	-1.72776	3.31213	down	sterile alpha motif domain containing 3	SAMD3	FALSE	Homo sapiens sterile alpha motif domain containing 3 (SAMD3), transcript variant 1, mRNA [NM_001017373]	154075	GO:0005515	130465840	chr6	130465781	-	hs|6q23.1	NM_001017373	chr6:130465840-130465781	NM_001017373	Hs.440508
A_33_P3251751	-3.3114	-1.72744	3.3114	down	carboxymethylenebutenolidase homolog (Pseudomonas)	CMBL	FALSE	Homo sapiens carboxymethylenebutenolidase homolog (Pseudomonas) (CMBL), mRNA [NM_138809]	134147	GO:0016787|GO:0008152|GO:0070062|GO:0005829	10277813	chr5	10277754	-	hs|5p15.2	NM_138809	chr5:10277813-10277754	NM_138809	Hs.192586
A_23_P256244	-3.30788	-1.72591	3.30788	down	oxidation resistance 1	OXR1	FALSE	oxidation resistance 1 [Source:HGNC Symbol;Acc:15822] [ENST00000497705]	55074	GO:0005739|GO:0003674|GO:0043524|GO:0016491|GO:0007628|GO:0005730|GO:0071447|GO:0005575|GO:0006979|GO:0055114	107719589	chr8	107719530	+	hs|8q23.1	AK096148	chr8:107719530-107719589		Hs.701892
A_33_P3216601	-3.30206	-1.72337	3.30206	down	fragile histidine triad	FHIT	FALSE	Homo sapiens fragile histidine triad (FHIT), transcript variant 1, mRNA [NM_002012]	2272	GO:0005515|GO:0006355|GO:0047710|GO:0005634|GO:0032435|GO:0003824|GO:0006351|GO:0042802|GO:0005829|GO:0005739|GO:0006260|GO:0005737|GO:0072332|GO:0000166|GO:0016787|GO:0031625|GO:0006163|GO:0009117|GO:0070062	59738011	chr3	59737952	-	hs|3p14.2	NM_002012	chr3:59738011-59737952	NM_002012	Hs.655995
A_23_P345692	-3.2967	-1.72102	3.2967	down	interleukin 17D	IL17D	FALSE	Homo sapiens interleukin 17D (IL17D), mRNA [NM_138284]	53342	GO:0006954|GO:0005615|GO:0005125	21297037	chr13	21296978	+	hs|13q12.11	NM_138284	chr13:21296978-21297037	NM_138284	Hs.655142
A_23_P433855	-3.29485	-1.72021	3.29485	down	regulator of G-protein signaling 4	RGS4	FALSE	Homo sapiens regulator of G-protein signaling 4 (RGS4), transcript variant 2, mRNA [NM_005613]	5999	GO:0043547|GO:0000188|GO:0043234|GO:0005516|GO:0001965|GO:0005737|GO:0008277|GO:0005886|GO:0038032|GO:0005829|GO:0005096	163042286	chr1	163042227	+	hs|1q23.3	NM_005613	chr1:163042227-163042286	NM_005613	Hs.386726
A_23_P87791	-3.29292	-1.71937	3.29292	down	acetyl-CoA carboxylase beta	ACACB	FALSE	Homo sapiens acetyl-CoA carboxylase beta (ACACB), mRNA [NM_001093]	32	GO:0005515|GO:0014070|GO:0042493|GO:0006853|GO:0006768|GO:0006767|GO:0005741|GO:0044281|GO:2001295|GO:0005524|GO:0006084|GO:0046872|GO:0012505|GO:0005829|GO:0031325|GO:0006112|GO:0051289|GO:0006766|GO:0009374|GO:0004075|GO:0006633|GO:0003989|GO:0044255	109703245	chr12	109703078	+	hs|12q24.11	NM_001093	chr12:109703078-109703245	NM_001093	Hs.234898
A_23_P3681	-3.28898	-1.71764	3.28898	down	neuropilin (NRP) and tolloid (TLL)-like 2	NETO2	FALSE	Homo sapiens neuropilin (NRP) and tolloid (TLL)-like 2 (NETO2), transcript variant 1, mRNA [NM_018092]	81831	GO:0032983|GO:2000312	47115839	chr16	47115780	-	hs|16q12.1	NM_018092	chr16:47115839-47115780	NM_018092	Hs.645802
A_32_P101031	-3.2836	-1.71528	3.2836	down	LY6/PLAUR domain containing 1	LYPD1	FALSE	Homo sapiens LY6/PLAUR domain containing 1 (LYPD1), transcript variant 1, mRNA [NM_144586]	116372	GO:0005886|GO:0031225	133402490	chr2	133402431	-	hs|2q21.2	NM_144586	chr2:133402490-133402431	NM_144586	Hs.432395
A_23_P254741	-3.2802	-1.71379	3.2802	down	superoxide dismutase 3, extracellular	SOD3	FALSE	Homo sapiens superoxide dismutase 3, extracellular (SOD3), mRNA [NM_003102]	6649	GO:0005515|GO:0005802|GO:0001666|GO:0005507|GO:0005796|GO:0005576|GO:0005634|GO:0005615|GO:0031012|GO:0005737|GO:0019430|GO:0008270|GO:0046688|GO:0008201|GO:0070062|GO:0055114|GO:0004784	24802459	chr4	24802400	+	hs|4p15.2	NM_003102	chr4:24802400-24802459	NM_003102	Hs.2420
A_33_P3628409	-3.28014	-1.71376	3.28014	down	DKFZp434H1419	PKI55	FALSE	Homo sapiens DKFZp434H1419 (PKI55), long non-coding RNA [NR_037701]	150967		217084849	chr2	217084790	+	hs|2q35	NR_037701	chr2:217084790-217084849	NR_037701	Hs.56876
A_23_P500353	-3.28007	-1.71373	3.28007	down	potassium intermediate/small conductance calcium-activated channel, subfamily N, member 2	KCNN2	FALSE	Homo sapiens potassium intermediate/small conductance calcium-activated channel, subfamily N, member 2 (KCNN2), transcript variant 1, mRNA [NM_021614]	3781	GO:0005516|GO:0030018|GO:0005886|GO:0007268|GO:0030315|GO:0042803|GO:0005790|GO:0016286|GO:0043197|GO:0051393|GO:0043025|GO:0016021|GO:0006813|GO:0015269|GO:0071805	113831894	chr5	113831835	+	hs|5q22.3	NM_021614	chr5:113831835-113831894	NM_021614	Hs.98280
A_33_P3287428	-3.27957	-1.7135	3.27957	down	leucine rich repeat containing 37, member A4, pseudogene	LRRC37A4P	FALSE	Homo sapiens hypothetical protein LOC652203, mRNA (cDNA clone MGC:111480 IMAGE:5581582), complete cds. [BC107850]	55073		43578758	chr17	43578699	-	hs|17q21.31	BC107850	chr17:43578758-43578699		Hs.596756
A_33_P3231267	-3.279	-1.71326	3.279	down			FALSE				52409123	chr5	52409064	+	hs|5q11.2	TCONS_00009961	chr5:52409064-52409123		Hs.12326
A_23_P421011	-3.27404	-1.71107	3.27404	down	Kazal-type serine peptidase inhibitor domain 1	KAZALD1	FALSE	Homo sapiens Kazal-type serine peptidase inhibitor domain 1 (KAZALD1), mRNA [NM_030929]	81621	GO:0001503|GO:0030198|GO:0007275|GO:0005614|GO:0001558|GO:0030154|GO:0005520	102825329	chr10	102825270	+	hs|10q24.31	NM_030929	chr10:102825270-102825329	NM_030929	Hs.632079
A_33_P3376214	-3.27375	-1.71094	3.27375	down	flavin containing monooxygenase 5	FMO5	FALSE	Homo sapiens flavin containing monooxygenase 5 (FMO5), transcript variant 2, mRNA [NM_001144829]	2330	GO:0050661|GO:0008150|GO:0004499|GO:0050660|GO:0005789|GO:0016021|GO:0055114	146656056	chr1	146655997	-	hs|1q21.1	NM_001144829	chr1:146656056-146655997	NM_001144829	Hs.642706
A_23_P114740	-3.27337	-1.71078	3.27337	down	complement factor H	CFH	FALSE	Homo sapiens complement factor H (CFH), transcript variant 1, mRNA [NM_000186]	3075	GO:0006957|GO:0005515|GO:0030449|GO:0006956|GO:0045087|GO:0072562|GO:0043395|GO:0005576|GO:0008201|GO:0005615	196716609	chr1	196716550	+	hs|1q31.3	NM_000186	chr1:196716550-196716609	NM_000186	Hs.363396
A_23_P218331	-3.25083	-1.70081	3.25083	down	cytochrome b561	CYB561	FALSE	Homo sapiens cytochrome b561 (CYB561), transcript variant 2, mRNA [NM_001017916]	1534	GO:0000293|GO:0022865|GO:0016021|GO:0022900|GO:0055085|GO:0046872	61510687	chr17	61510628	-	hs|17q23.3	NM_001017916	chr17:61510687-61510628	NM_001017916	Hs.355264
A_33_P3259198	-3.25047	-1.70065	3.25047	down	transmembrane protein 255B	TMEM255B	FALSE	Homo sapiens transmembrane protein 255B (TMEM255B), mRNA [NM_182614]	348013	GO:0016021	114503884	chr13	114503825	+	hs|13q34	NM_182614	chr13:114503825-114503884	NM_182614	Hs.280805
A_33_P3297930	-3.24811	-1.6996	3.24811	down	collagen, type VIII, alpha 2	COL8A2	FALSE	Homo sapiens collagen, type VIII, alpha 2 (COL8A2), mRNA [NM_005202]	1296	GO:0005581|GO:0005578|GO:0005576|GO:0048593|GO:0001525|GO:0050673|GO:0005604|GO:0031012|GO:0016337|GO:0022617|GO:0030198|GO:0030574|GO:0005788|GO:0030674|GO:0005201	36563361	chr1	36563302	-	hs|1p34.3	NM_005202	chr1:36563361-36563302	NM_005202	Hs.353001
A_33_P3350094	-3.24568	-1.69852	3.24568	down	protein associated with topoisomerase II homolog 2 (yeast)	PATL2	FALSE	Homo sapiens protein associated with topoisomerase II homolog 2 (yeast) (PATL2), mRNA [NM_001145112]	197135	GO:0017148|GO:0005515|GO:0005737|GO:0010607|GO:0000932|GO:0030529|GO:0003723|GO:0005634	44958077	chr15	44958018	-	hs|15q21.1	NM_001145112	chr15:44958077-44958018	NM_001145112	Hs.11594
A_23_P157136	-3.24464	-1.69806	3.24464	down	scinderin	SCIN	FALSE	Homo sapiens scinderin (SCIN), transcript variant 2, mRNA [NM_033128]	85477	GO:0008285|GO:0043065|GO:0051047|GO:0005509|GO:0005546|GO:0003779|GO:0032330|GO:0051693|GO:0045010|GO:0051014|GO:0005545|GO:0043234|GO:0045654|GO:0005737|GO:0051015|GO:0017156|GO:0001786|GO:0005856|GO:0005938|GO:0070062	12692402	chr7	12692343	+	hs|7p21.3	NM_033128	chr7:12692343-12692402	NM_033128	Hs.655515
A_33_P3255304	-3.24136	-1.6966	3.24136	down	gamma-glutamyltransferase 5	GGT5	FALSE	Homo sapiens gamma-glutamyltransferase 5 (GGT5), transcript variant 1, mRNA [NM_001099781]	2687	GO:0019369|GO:0006520|GO:0019370|GO:0005886|GO:0006749|GO:0044281|GO:0006691|GO:0031362|GO:0006954|GO:0003840|GO:0006750|GO:0006508|GO:0016021	24615682	chr22	24615623	-	hs|22q11.23	NM_001099781	chr22:24615682-24615623	NM_001099781	Hs.437156
A_33_P3301524	-3.23134	-1.69213	3.23134	down	X-ray repair complementing defective repair in Chinese hamster cells 3	XRCC3	FALSE	Homo sapiens X-ray repair complementing defective repair in Chinese hamster cells 3 (XRCC3), transcript variant 1, mRNA [NM_001100119]	7517	GO:0000400|GO:0005515|GO:0048471|GO:0010033|GO:0006200|GO:0071140|GO:0005657|GO:0008821|GO:0005634|GO:0006310|GO:0090267|GO:0010824|GO:0005524|GO:0006974|GO:0005739|GO:0005737|GO:0006281|GO:0000724|GO:0033065|GO:0000737|GO:0008094	104164014	chr14	104163955	-	hs|14q32.33	NM_001100119	chr14:104164014-104163955	NM_001100119	Hs.733412
A_23_P21207	-3.23106	-1.69201	3.23106	down	ubiquitin-like modifier activating enzyme 7	UBA7	FALSE	Homo sapiens ubiquitin-like modifier activating enzyme 7 (UBA7), mRNA [NM_003335]	7318	GO:0004842|GO:0016567|GO:0032020|GO:0019221|GO:0004839|GO:0005634|GO:0005524|GO:0005829|GO:0019941|GO:0045087|GO:0032480|GO:0006464|GO:0019782	49845476	chr3	49845325	-	hs|3p21.31	NM_003335	chr3:49845476-49845325	NM_003335	Hs.16695
A_23_P73114	-3.21965	-1.68691	3.21965	down	protein S (alpha)	PROS1	FALSE	Homo sapiens protein S (alpha) (PROS1), mRNA [NM_000313]	5627	GO:0030449|GO:0004866|GO:0005796|GO:0005509|GO:0030168|GO:0072562|GO:0005576|GO:0050900|GO:0005615|GO:0010951|GO:0017187|GO:0000139|GO:0007596|GO:0045087|GO:0002576|GO:0005789|GO:0006508|GO:0031093|GO:0044267|GO:0042730|GO:0043687	93592208	chr3	93592149	-	hs|3q11.1	NM_000313	chr3:93592208-93592149	NM_000313	Hs.64016
A_23_P218190	-3.21571	-1.68514	3.21571	down	calpain 3, (p94)	CAPN3	FALSE	Homo sapiens calpain 3, (p94) (CAPN3), transcript variant 1, mRNA [NM_000070]	825	GO:0005515|GO:0030018|GO:0030016|GO:0045661|GO:0005622|GO:0001896|GO:0006508|GO:0008307|GO:0043122|GO:0055103|GO:0014850|GO:0014718|GO:0005509|GO:0071472|GO:0045214|GO:0061061|GO:0031432|GO:0043234|GO:0051592|GO:0007517|GO:0097264|GO:0008233|GO:0008234|GO:0045893|GO:0045892|GO:0005886|GO:0005634|GO:0003824|GO:0031402|GO:0046716|GO:0005829|GO:0005737|GO:0051092|GO:0030239|GO:0071277|GO:0004871|GO:…	42704045	chr15	42703986	+	hs|15q15.1	NM_000070	chr15:42703986-42704045	NM_000070	Hs.143261
A_23_P26557	-3.21402	-1.68438	3.21402	down	chromosome 16 open reading frame 59	C16orf59	FALSE	Homo sapiens chromosome 16 open reading frame 59 (C16orf59), mRNA [NM_025108]	80178		2514854	chr16	2514795	+	hs|16p13.3	NM_025108	chr16:2514795-2514854	NM_025108	Hs.534491
A_33_P3246985	-3.20987	-1.68252	3.20987	down	phosphodiesterase 4D interacting protein	PDE4DIP	FALSE	Homo sapiens phosphodiesterase 4D interacting protein (PDE4DIP), transcript variant 3, mRNA [NM_022359]	9659	GO:0005515|GO:0005813|GO:0005737|GO:0005794|GO:0005634|GO:0030016|GO:0019899|GO:0043623	144952275	chr1	144952216	-	hs|1q21.1	NM_022359	chr1:144952275-144952216	NM_022359	Hs.731111
A_23_P31124	-3.20462	-1.68016	3.20462	down	collagen, type XXI, alpha 1	COL21A1	FALSE	Homo sapiens collagen, type XXI, alpha 1 (COL21A1), mRNA [NM_030820]	81578	GO:0031012|GO:0005581|GO:0030198|GO:0005578|GO:0005788|GO:0005576	55921701	chr6	55921642	-	hs|6p12.1	NM_030820	chr6:55921701-55921642	NM_030820	Hs.47629
A_33_P3322383	-3.19437	-1.67553	3.19437	down			FALSE				37276368	chr14	37276309	+	hs|14q13.3		chr14:037276309-037276368
A_33_P3373259	-3.18526	-1.67141	3.18526	down	calcium channel, voltage-dependent, alpha 2/delta subunit 3	CACNA2D3	FALSE	Homo sapiens calcium channel, voltage-dependent, alpha 2/delta subunit 3 (CACNA2D3), mRNA [NM_018398]	55799	GO:0005245|GO:0070588|GO:0034765|GO:0016021|GO:0046872	54913109	chr3	54913050	+	hs|3p14.3	NM_018398	chr3:54913050-54913109	NM_018398	Hs.656687
A_33_P3292646	-3.18447	-1.67105	3.18447	down	MAM and LDL receptor class A domain containing 1	MALRD1	FALSE	Homo sapiens MAM and LDL receptor class A domain containing 1 (MALRD1), mRNA [NM_001142308]	340895	GO:0016021	19856501	chr10	19856442	+	hs|10p12.31	NM_001142308	chr10:19856442-19856501	NM_001142308	Hs.646734
A_33_P3214690	-3.17534	-1.66691	3.17534	down	neuroligin 1	NLGN1	FALSE	Homo sapiens neuroligin 1 (NLGN1), mRNA [NM_014932]	22871	GO:0030054|GO:0017146|GO:2000311|GO:0045202|GO:0051491|GO:2000310|GO:0006605|GO:0016339|GO:1900029|GO:0045211|GO:0046983|GO:0051260|GO:0050839|GO:0060999|GO:0097091|GO:0048789|GO:0051965|GO:0009986|GO:2000463|GO:0051968|GO:0030165|GO:0007416|GO:0032230|GO:0005887|GO:0009897|GO:0023041|GO:0016080|GO:0035418|GO:0097120|GO:0051290|GO:1900244|GO:0032433|GO:0030425|GO:0045184|GO:0002087|GO:0097115|GO:…	173999051	chr3	173998992	+	hs|3q26.31	NM_014932	chr3:173998992-173999051	NM_014932	Hs.478289
A_33_P3290338	-3.1752	-1.66685	3.1752	down	poly (ADP-ribose) polymerase 1	PARP1	FALSE	Homo sapiens poly (ADP-ribose) polymerase 1 (PARP1), mRNA [NM_001618]	142	GO:0005515|GO:0010467|GO:0016540|GO:2000679|GO:0006367|GO:0006366|GO:0005634|GO:0005635|GO:0042802|GO:0006302|GO:0003950|GO:0006471|GO:0051287|GO:0000723|GO:0042769|GO:0045944|GO:0030225|GO:0007179|GO:0005667|GO:0032869|GO:0023019|GO:0005730|GO:0070412|GO:0000122|GO:0060391|GO:0003677|GO:0006351|GO:0070212|GO:0047485|GO:0006281|GO:0006284|GO:0005654|GO:0008270|GO:0019899|GO:0040009|GO:0008134	226590004	chr1	226589945	-	hs|1q42.12	NM_001618	chr1:226590004-226589945	NM_001618	Hs.177766
A_23_P76774	-3.16882	-1.66394	3.16882	down	goosecoid homeobox	GSC	FALSE	Homo sapiens goosecoid homeobox (GSC), mRNA [NM_173849]	145258	GO:0001103|GO:0005667|GO:0003700|GO:0007369|GO:0023019|GO:0030178|GO:0048704|GO:0005634|GO:0000122|GO:0043565|GO:0048644|GO:0001085|GO:0021904|GO:0042474|GO:0030900	95234799	chr14	95234740	-	hs|14q32.13	NM_173849	chr14:95234799-95234740	NM_173849	Hs.440438
A_23_P158277	-3.16227	-1.66096	3.16227	down	transmembrane and coiled-coil domains 4	TMCO4	FALSE	Homo sapiens transmembrane and coiled-coil domains 4 (TMCO4), mRNA [NM_181719]	255104	GO:0016021	20009254	chr1	20009195	-	hs|1p36.13	NM_181719	chr1:20009254-20009195	NM_181719	Hs.656313
A_19_P00317547	-3.16155	-1.66063	3.16155	down	uncharacterized LOC100130476	LOC100130476	FALSE	Homo sapiens uncharacterized LOC100130476 (LOC100130476), long non-coding RNA [NR_049793]	100130476		138144988	chr6	138144929	-	hs|6q23.3	NR_049793	chr6:138144988-138144929	NR_049793	Hs.598050
A_19_P00808500	-3.16035	-1.66008	3.16035	down			FALSE				4891570	chr9	4891511	+	hs|9p24.1		chr9:004891511-004891570
A_23_P147665	-3.1588	-1.65938	3.1588	down	olfactomedin-like 1	OLFML1	FALSE	Homo sapiens olfactomedin-like 1 (OLFML1), mRNA [NM_198474]	283298	GO:0005576	7531875	chr11	7531816	+	hs|11p15.4	NM_198474	chr11:7531816-7531875	NM_198474	Hs.503500
A_33_P3283713	-3.15826	-1.65913	3.15826	down	abhydrolase domain containing 14A	ABHD14A	FALSE	Homo sapiens abhydrolase domain containing 14A (ABHD14A), mRNA [NM_015407]	25864	GO:0005737|GO:0016787|GO:0008152|GO:0016021|GO:0070062	52015204	chr3	52015145	+	hs|3p21.2	NM_015407	chr3:52015145-52015204	NM_015407	Hs.534400
A_23_P64828	-3.14594	-1.65349	3.14594	down	2'-5'-oligoadenylate synthetase 1, 40/46kDa	OAS1	FALSE	Homo sapiens 2'-5'-oligoadenylate synthetase 1, 40/46kDa (OAS1), transcript variant 2, mRNA [NM_002534]	4938	GO:0003725|GO:0005515|GO:0035457|GO:0005783|GO:0001730|GO:0019221|GO:0005576|GO:0005634|GO:0042593|GO:0009615|GO:0051259|GO:0005524|GO:0046872|GO:0005829|GO:0005739|GO:0051607|GO:0005737|GO:0060337|GO:0006006|GO:0008270|GO:0060700|GO:0060333|GO:0045071|GO:0006164	113354520	chr12	113354461	+	hs|12q24.13	NM_002534	chr12:113354461-113354520	NM_002534	Hs.524760
A_23_P252928	-3.14282	-1.65206	3.14282	down	melanoma antigen family A, 12	MAGEA12	FALSE	Homo sapiens melanoma antigen family A, 12 (MAGEA12), transcript variant 3, mRNA [NM_005367]	4111	GO:0008150|GO:0003674|GO:0005575	151899971	chrX	151899912	-	hs|Xq28	NM_005367	chrX:151899971-151899912	NM_005367	Hs.169246
A_33_P3365117	-3.13698	-1.64938	3.13698	down	aldo-keto reductase family 1, member C1	AKR1C1	FALSE	aldo-keto reductase family 1, member C1 [Source:HGNC Symbol;Acc:384] [ENST00000380859]	1645	GO:0031406|GO:0044598|GO:0046683|GO:0032052|GO:0006805|GO:0044597|GO:0007603|GO:0047086|GO:0005829|GO:0030299|GO:0016655|GO:0071395|GO:0042574|GO:0030855|GO:0047115|GO:0051260|GO:0008206|GO:0047042|GO:0070062|GO:0042632|GO:0047718|GO:0007586|GO:0047006|GO:0001523|GO:0004032|GO:0004033|GO:0015721|GO:0042448|GO:0018636|GO:0055114	5011995	chr10	5011936	+	hs|10p15.1		chr10:5011936-5011995
A_23_P36658	-3.1365	-1.64915	3.1365	down	microsomal glutathione S-transferase 1	MGST1	FALSE	Homo sapiens microsomal glutathione S-transferase 1 (MGST1), transcript variant 3, mRNA [NM_145791]	4257	GO:0005515|GO:0006805|GO:0005783|GO:0042493|GO:0005743|GO:0045177|GO:0006749|GO:0010243|GO:0005634|GO:0005741|GO:0044281|GO:0004364|GO:0042803|GO:0071449|GO:0004602|GO:0005739|GO:0070207|GO:0043295|GO:0032496|GO:0005789|GO:0033327|GO:0016021|GO:0005778|GO:0055114	16516966	chr12	16516907	+	hs|12p12.3	NM_145791	chr12:16516907-16516966	NM_145791	Hs.389700
A_32_P103633	-3.1361	-1.64897	3.1361	down	minichromosome maintenance complex component 2	MCM2	FALSE	Homo sapiens minichromosome maintenance complex component 2 (MCM2), transcript variant 1, mRNA [NM_004526]	4171	GO:0005515|GO:0042555|GO:0006334|GO:0005730|GO:0005634|GO:0003688|GO:0003677|GO:0005524|GO:0046872|GO:0003678|GO:0006260|GO:0042393|GO:0007049|GO:0006271|GO:0000082|GO:0005737|GO:0006270|GO:0015630|GO:0006268|GO:0071353|GO:0005654|GO:0005664|GO:0000278|GO:0000785	127340864	chr3	127340805	+	hs|3q21.3	NM_004526	chr3:127340805-127340864	NM_004526	Hs.477481
A_23_P147397	-3.13109	-1.64667	3.13109	down	dynein, cytoplasmic 2, heavy chain 1	DYNC2H1	FALSE	Homo sapiens dynein, cytoplasmic 2, heavy chain 1 (DYNC2H1), transcript variant 2, mRNA [NM_001080463]	79659	GO:0007368|GO:0021522|GO:0005794|GO:0005886|GO:0006200|GO:0005874|GO:0045177|GO:0031512|GO:0030326|GO:0009953|GO:0003777|GO:0005524|GO:0005829|GO:0042384|GO:0019886|GO:0003774|GO:0030286|GO:0008105|GO:0016485|GO:0007030|GO:0030900|GO:0016887|GO:0070062|GO:0007018	103349896	chr11	103349837	+	hs|11q22.3	NM_001080463	chr11:103349837-103349896	NM_001080463	Hs.503721
A_33_P3385686	-3.12761	-1.64506	3.12761	down			FALSE	BC060845 l(3)mbt-like 3, isoform b {Homo sapiens} (exp=-1; wgp=0; cg=0), partial (8%) [THC2691182]			130454177	chr6	130454118	-	hs|6q23.1		chr6:130454177-130454118
A_33_P3415828	-3.12248	-1.64269	3.12248	down			FALSE	Synthetic construct Homo sapiens gateway clone IMAGE:100016753 3' read PLA2G12A mRNA. [CU677870]			110650787	chr4	110639886	+	hs|4q25	CU677870	chr4:110639886-110650787
A_33_P3846653	-3.11511	-1.63928	3.11511	down	keratin 19 pseudogene 2	KRT19P2	FALSE	Homo sapiens keratin 19 pseudogene 2 (KRT19P2), non-coding RNA [NR_036685]	160313		95228795	chr12	95228736	+	hs|12q22	NR_036685	chr12:95228736-95228795	NR_036685	Hs.527883
A_23_P156687	-3.11284	-1.63823	3.11284	down	complement factor B	CFB	FALSE	Homo sapiens complement factor B (CFB), mRNA [NM_001710]	629	GO:0006957|GO:0030449|GO:0006956|GO:0005886|GO:0004252|GO:0001848|GO:0045087|GO:0006508|GO:0072562|GO:0005576|GO:0005615|GO:0070062	31919147	chr6	31918992	+	hs|6p21.33	NM_001710	chr6:31918992-31919147	NM_001710	Hs.69771
A_23_P233	-3.10937	-1.63662	3.10937	down	flavin containing monooxygenase 5	FMO5	FALSE	Homo sapiens flavin containing monooxygenase 5 (FMO5), transcript variant 1, mRNA [NM_001461]	2330	GO:0050661|GO:0008150|GO:0004499|GO:0050660|GO:0005789|GO:0016021|GO:0055114	146658421	chr1	146658362	-	hs|1q21.1	NM_001461	chr1:146658421-146658362	NM_001461	Hs.642706
A_33_P3244347	-3.10868	-1.6363	3.10868	down	pyruvate carboxylase	PC	FALSE	Homo sapiens pyruvate carboxylase (PC), transcript variant 3, mRNA [NM_001040716]	5091	GO:0006629|GO:0005515|GO:0005975|GO:0006768|GO:0006107|GO:0005743|GO:0006094|GO:0006767|GO:0044281|GO:0003677|GO:0005524|GO:0046872|GO:0005829|GO:0005739|GO:0006766|GO:0006090|GO:0005759|GO:0009374|GO:0004736|GO:0004075|GO:0006006	66616157	chr11	66616098	-	hs|11q13.2	NM_001040716	chr11:66616157-66616098	NM_001040716	Hs.89890
A_23_P202104	-3.10455	-1.63438	3.10455	down	peptidylprolyl isomerase F	PPIF	FALSE	Homo sapiens peptidylprolyl isomerase F (PPIF), mRNA [NM_005729]	10105	GO:0000413|GO:0005515|GO:0046902|GO:0043066|GO:0016018|GO:0070301|GO:0010849|GO:0003755|GO:0090324|GO:0032780|GO:2001243|GO:0005753|GO:0008637|GO:0090201|GO:0016020|GO:0006457|GO:0002931|GO:0005759|GO:0090200|GO:0071277|GO:2000276|GO:0071243|GO:0010940	81114377	chr10	81114318	+	hs|10q22.3	NM_005729	chr10:81114318-81114377	NM_005729	Hs.381072
A_19_P00324587	-3.10431	-1.63427	3.10431	down			FALSE				130826409	chrX	130826350	-	hs|Xq26.2		chrX:130826409-130826350
A_23_P30294	-3.10426	-1.63425	3.10426	down	cysteine dioxygenase type 1	CDO1	FALSE	Homo sapiens cysteine dioxygenase type 1 (CDO1), mRNA [NM_001801]	1036	GO:0045471|GO:0006534|GO:0051384|GO:0044281|GO:0051591|GO:0008198|GO:0005829|GO:0034641|GO:0000096|GO:0006954|GO:0000097|GO:0007595|GO:0000098|GO:0033762|GO:0017172|GO:0042412|GO:0043200|GO:0019448|GO:0055114	115140611	chr5	115140552	-	hs|5q22.3	NM_001801	chr5:115140611-115140552	NM_001801	Hs.442378
A_23_P207089	-3.10278	-1.63356	3.10278	down	sex hormone-binding globulin	SHBG	FALSE	Homo sapiens sex hormone-binding globulin (SHBG), transcript variant 1, mRNA [NM_001040]	6462	GO:0007285|GO:0005576|GO:0005497|GO:0070062	7536194	chr17	7536135	+	hs|17p13.1	NM_001040	chr17:7536135-7536194	NM_001040	Hs.632235
A_24_P349207	-3.09966	-1.63211	3.09966	down	POM121 membrane glycoprotein (rat) pseudogene	LOC441081	FALSE	Homo sapiens POM121 membrane glycoprotein (rat) pseudogene (LOC441081), non-coding RNA [NR_073404]	441081	GO:0016021	68931876	chr5	68931817	+	hs|5q13.2	NR_073404	chr5:68931817-68931876	NR_073404	Hs.721548
A_23_P11685	-3.09894	-1.63178	3.09894	down	phospholipase A2, group IVA (cytosolic, calcium-dependent)	PLA2G4A	FALSE	Homo sapiens phospholipase A2, group IVA (cytosolic, calcium-dependent) (PLA2G4A), mRNA [NM_024420]	5321	GO:0046456|GO:0019369|GO:0005743|GO:0035965|GO:0044281|GO:0006690|GO:0005829|GO:0005544|GO:0005737|GO:0004622|GO:0042127|GO:0047498|GO:0004623|GO:0006654|GO:0071236|GO:0050482|GO:0005794|GO:0006663|GO:0036149|GO:0005509|GO:0036148|GO:0030168|GO:0036150|GO:0007596|GO:0005789|GO:0016023|GO:0006644|GO:0009395|GO:0036151|GO:0046474|GO:0036152	186957711	chr1	186957652	+	hs|1q31.1	NM_024420	chr1:186957652-186957711	NM_024420	Hs.497200
A_33_P3789693	-3.09879	-1.63171	3.09879	down	uncharacterized MGC24103	MGC24103	FALSE	Homo sapiens hypothetical MGC24103, mRNA (cDNA clone MGC:24103 IMAGE:4613905), complete cds. [BC020879]	158295		16526545	chr9	16526486	-	hs|9p22.3	BC020879	chr9:16526545-16526486		Hs.664877
A_23_P164814	-3.09826	-1.63146	3.09826	down	chromosome 19 open reading frame 57	C19orf57	FALSE	Homo sapiens chromosome 19 open reading frame 57 (C19orf57), mRNA [NM_024323]	79173	GO:0005515|GO:0003674|GO:0007275|GO:0005575	13993314	chr19	13993255	-	hs|19p13.13	NM_024323	chr19:13993314-13993255	NM_024323	Hs.143288
A_19_P00318261	-3.08185	-1.6238	3.08185	down	small nucleolar RNA, H/ACA box 26	SNORA26	FALSE	Homo sapiens small nucleolar RNA, H/ACA box 26 (SNORA26), small nucleolar RNA [NR_003016]	677810		53579526	chr4	53579467	+	hs|4q12	NR_003016	chr4:53579467-53579526	NR_003016	Hs.635034
A_19_P00316164	-3.07958	-1.62273	3.07958	down	uncharacterized LOC101928858	LOC101928858	FALSE	PREDICTED: Homo sapiens uncharacterized LOC101928858 (RP11-434D9.1), transcript variant X2, ncRNA [XR_425858]	101928858		67093414	chr5	67093355	+	hs|5q13.1	XR_425858	chr5:67093355-67093414	XR_425858
A_23_P1552	-3.07881	-1.62237	3.07881	down	cathepsin C	CTSC	FALSE	Homo sapiens cathepsin C (CTSC), transcript variant 1, mRNA [NM_001814]	1075	GO:0005515|GO:0031404|GO:0005794|GO:0010033|GO:0004252|GO:0019902|GO:0005783|GO:2001235|GO:0007568|GO:0051087|GO:0006915|GO:0043621|GO:0005615|GO:0005764|GO:0042802|GO:0016505|GO:0006955|GO:0001913|GO:0006508|GO:0008234|GO:0070062	88042347	chr11	88033771	-	hs|11q14.2	NM_001814	chr11:88042347-88033771	NM_001814	Hs.128065
A_23_P72068	-3.0762	-1.62115	3.0762	down	GDP-mannose 4,6-dehydratase	GMDS	FALSE	Homo sapiens GDP-mannose 4,6-dehydratase (GMDS), transcript variant 1, mRNA [NM_001500]	2762	GO:0005737|GO:0007219|GO:0008446|GO:0019673|GO:0042351|GO:0070401|GO:0070062	1960186	chr6	1960127	-	hs|6p25.3	NM_001500	chr6:1960186-1960127	NM_001500	Hs.144496
A_33_P3252695	-3.07489	-1.62053	3.07489	down	cytokine-like 1	CYTL1	FALSE	Homo sapiens cytokine-like 1 (CYTL1), mRNA [NM_018659]	54360	GO:0007165|GO:0051091|GO:0050650|GO:0048839|GO:0002062|GO:0045944|GO:0005102|GO:0005615	5018622	chr4	5018563	-	hs|4p16.2	NM_018659	chr4:5018622-5018563	NM_018659	Hs.13872
A_24_P63030	-3.07277	-1.61954	3.07277	down	sideroflexin 5	SFXN5	FALSE	Homo sapiens sideroflexin 5 (SFXN5), mRNA [NM_144579]	94097	GO:0015746|GO:0015137|GO:0008324|GO:0005743|GO:0016021|GO:0055085|GO:0055072|GO:0006812	73169517	chr2	73169458	-	hs|2p13.2	NM_144579	chr2:73169517-73169458	NM_144579	Hs.368171
A_24_P357726	-3.07195	-1.61915	3.07195	down	pregnancy specific beta-1-glycoprotein 8	PSG8	FALSE	Homo sapiens pregnancy specific beta-1-glycoprotein 8 (PSG8), transcript variant 1, mRNA [NM_182707]	440533	GO:0005576	43259206	chr19	43259147	-	hs|19q13.2	NM_182707	chr19:43259206-43259147	NM_182707	Hs.466843
A_23_P9293	-3.07149	-1.61894	3.07149	down	tight junction protein 2	TJP2	FALSE	Homo sapiens tight junction protein 2 (TJP2), transcript variant 1, mRNA [NM_004817]	9414	GO:0005515|GO:0010033|GO:0030054|GO:0005886|GO:0004385|GO:0006915|GO:0035329|GO:0008022|GO:0006921|GO:0005829|GO:0005737|GO:0005912|GO:0046939|GO:0005654|GO:0005923	71869503	chr9	71869444	+	hs|9q21.11	NM_004817	chr9:71869444-71869503	NM_004817	Hs.50382
A_33_P3262191	-3.06298	-1.61493	3.06298	down	copine VII	CPNE7	FALSE	Homo sapiens copine VII (CPNE7), transcript variant 2, mRNA [NM_014427]	27132	GO:0006629|GO:0005215|GO:0006810	89663653	chr16	89663594	+	hs|16q24.3	NM_014427	chr16:89663594-89663653	NM_014427	Hs.461775
A_23_P153562	-3.05807	-1.61262	3.05807	down	complement component 5a receptor 1	C5AR1	FALSE	Homo sapiens complement component 5a receptor 1 (C5AR1), mRNA [NM_001736]	728	GO:0021534|GO:0005886|GO:0004944|GO:0050830|GO:0007606|GO:0031100|GO:0001856|GO:0007202|GO:0007204|GO:0000187|GO:0016323|GO:0006955|GO:0043524|GO:0006954|GO:0006935|GO:0032496|GO:0042789|GO:0070374|GO:0004878|GO:0050679|GO:0009986|GO:0030593|GO:0006915|GO:0045177|GO:0007165|GO:0006968|GO:0005887|GO:0032494	47824560	chr19	47824501	+	hs|19q13.32	NM_001736	chr19:47824501-47824560	NM_001736	Hs.2161
A_23_P78170	-3.05776	-1.61247	3.05776	down	MYB binding protein (P160) 1a	MYBBP1A	FALSE	Homo sapiens MYB binding protein (P160) 1a (MYBBP1A), transcript variant 2, mRNA [NM_014520]	10514	GO:0005515|GO:0006355|GO:0042564|GO:0003887|GO:0005730|GO:0005634|GO:0071158|GO:0001649|GO:0006351|GO:0043231|GO:0006913|GO:0043565|GO:0022904|GO:0006261|GO:0005737|GO:0072332|GO:0016020|GO:0042149|GO:0045892|GO:0008134	4442814	chr17	4442755	-	hs|17p13.2	NM_014520	chr17:4442814-4442755	NM_014520	Hs.701718
A_32_P194264	-3.04993	-1.60878	3.04993	down	ChaC, cation transport regulator homolog 2 (E. coli)	CHAC2	FALSE	Homo sapiens ChaC, cation transport regulator homolog 2 (E. coli) (CHAC2), mRNA [NM_001008708]	494143	GO:0008150|GO:0003674|GO:0005575	54001513	chr2	54001454	+	hs|2p16.2	NM_001008708	chr2:54001454-54001513	NM_001008708	Hs.585944
A_23_P134935	-3.04896	-1.60832	3.04896	down	dual specificity phosphatase 4	DUSP4	FALSE	Homo sapiens dual specificity phosphatase 4 (DUSP4), transcript variant 1, mRNA [NM_001394]	1846	GO:0034142|GO:0005634|GO:0051403|GO:0035335|GO:0000188|GO:0002756|GO:0006470|GO:0000165|GO:0002755|GO:0034138|GO:0017017|GO:0004725|GO:0001706|GO:0048011|GO:0038124|GO:0038123|GO:0034134|GO:0008330|GO:0002224|GO:0045087|GO:0005654|GO:0034166|GO:0035666|GO:0008138|GO:0034146|GO:0034162	29194441	chr8	29194382	-	hs|8p12	NM_001394	chr8:29194441-29194382	NM_001394	Hs.417962
A_23_P256047	-3.04755	-1.60765	3.04755	down	ankyrin repeat and EF-hand domain containing 1	ANKEF1	FALSE	Homo sapiens ankyrin repeat and EF-hand domain containing 1 (ANKEF1), transcript variant 1, mRNA [NM_022096]	63926	GO:0005509	10036945	chr20	10036886	+	hs|20p12.2	NM_022096	chr20:10036886-10036945	NM_022096	Hs.70903
A_33_P3359047	-3.0377	-1.60298	3.0377	down	LY6/PLAUR domain containing 6	LYPD6	FALSE	Homo sapiens LY6/PLAUR domain containing 6 (LYPD6), transcript variant 1, mRNA [NM_001195685]	130574	GO:0005576	150327534	chr2	150327475	+	hs|2q23.2	NM_001195685	chr2:150327475-150327534	NM_001195685	Hs.21929
A_24_P65507	-3.03593	-1.60214	3.03593	down	stimulated by retinoic acid 13	STRA13	FALSE	Homo sapiens stimulated by retinoic acid 13 (STRA13), transcript variant 2, mRNA [NM_144998]	201254	GO:0005515|GO:0071821|GO:0007067|GO:0051382|GO:0006281|GO:0003690|GO:0000712|GO:0031398|GO:0000777|GO:0031297|GO:0003677|GO:0043240	79976695	chr17	79976636	-	hs|17q25.3	NM_144998	chr17:79976695-79976636	NM_144998	Hs.37616
A_23_P162970	-3.03486	-1.60163	3.03486	down	importin 4	IPO4	FALSE	Homo sapiens importin 4 (IPO4), transcript variant 1, mRNA [NM_024658]	79711	GO:0043234|GO:0005737|GO:0000790|GO:0005643|GO:0008536|GO:0006335|GO:0006336|GO:0015031|GO:0006886	24650726	chr14	24649913	-	hs|14q12	NM_024658	chr14:24650726-24649913	NM_024658	Hs.411865
A_23_P209978	-3.03251	-1.60051	3.03251	down	visinin-like 1	VSNL1	FALSE	Homo sapiens visinin-like 1 (VSNL1), mRNA [NM_003385]	7447	GO:0005509	17837283	chr2	17837224	+	hs|2p24.2	NM_003385	chr2:17837224-17837283	NM_003385	Hs.444212
A_33_P3326617	-3.0252	-1.59703	3.0252	down	fumarylacetoacetate hydrolase domain containing 1	FAHD1	FALSE	Homo sapiens fumarylacetoacetate hydrolase domain containing 1 (FAHD1), transcript variant 1, mRNA [NM_001018104]	81889	GO:0005739|GO:0005737|GO:0008152|GO:0005743|GO:0005730|GO:0047621|GO:0005634|GO:0018773|GO:0046872|GO:0034545|GO:0005829	1890172	chr16	1890113	+	hs|16p13.3	NM_001018104	chr16:1890113-1890172	NM_001018104	Hs.513265
A_23_P432013	-3.02128	-1.59516	3.02128	down	zona pellucida-like domain containing 1	ZPLD1	FALSE	Homo sapiens zona pellucida-like domain containing 1 (ZPLD1), mRNA [NM_175056]	131368	GO:0016021	102198161	chr3	102198102	+	hs|3q12.3	NM_175056	chr3:102198102-102198161	NM_175056	Hs.352213
A_23_P33465	-3.01865	-1.5939	3.01865	down	cysteine-rich with EGF-like domains 2	CRELD2	FALSE	Homo sapiens cysteine-rich with EGF-like domains 2 (CRELD2), transcript variant 2, mRNA [NM_024324]	79174	GO:0005515|GO:0005794|GO:0005783|GO:0005509|GO:0005615	50320977	chr22	50320918	+	hs|22q13.33	NM_024324	chr22:50320918-50320977	NM_024324	Hs.211282
A_32_P167076	-3.01648	-1.59287	3.01648	down	calpain 14	CAPN14	FALSE	Homo sapiens calpain 14 (CAPN14), mRNA [NM_001145122]	440854	GO:0005737|GO:0004198|GO:0005509|GO:0006508|GO:0005730|GO:0005634	31396260	chr2	31396201	-	hs|2p23.1	NM_001145122	chr2:31396260-31396201	NM_001145122	Hs.468059
A_23_P309739	-3.01287	-1.59114	3.01287	down	estrogen receptor 1	ESR1	FALSE	Homo sapiens estrogen receptor 1 (ESR1), transcript variant 1, mRNA [NM_000125]	2099	GO:0005515|GO:0010467|GO:0043627|GO:0006367|GO:0003700|GO:0008013|GO:0060750|GO:0003707|GO:0042802|GO:0002064|GO:0005496|GO:0032355|GO:0043124|GO:0005794|GO:0000978|GO:0060687|GO:0001547|GO:0048386|GO:0051000|GO:0008270|GO:0005654|GO:0019899|GO:0008134|GO:0060065|GO:0005886|GO:0060068|GO:0007200|GO:0030284|GO:0005634|GO:0038052|GO:0048146|GO:0007204|GO:0043433|GO:0045429|GO:0034056|GO:0051091|GO:…	152423967	chr6	152423908	+	hs|6q25.1	NM_000125	chr6:152423908-152423967	NM_000125	Hs.208124
A_23_P310956	-3.01238	-1.5909	3.01238	down	collagen, type VI, alpha 2	COL6A2	FALSE	Homo sapiens collagen, type VI, alpha 2 (COL6A2), transcript variant 2C2a', mRNA [NM_058175]	1292	GO:0005515|GO:0005581|GO:0005578|GO:0005576|GO:0005615|GO:0009749|GO:0070208|GO:0042383|GO:0031012|GO:0043234|GO:0022617|GO:0007411|GO:0030198|GO:0030574|GO:0005788|GO:0007155|GO:0070062	47549350	chr21	47549291	+	hs|21q22.3	NM_058175	chr21:47549291-47549350	NM_058175	Hs.420269
A_33_P3259203	-3.01215	-1.5908	3.01215	down	transmembrane protein 255B	TMEM255B	FALSE	PREDICTED: Homo sapiens transmembrane protein 255B (TMEM255B), transcript variant X6, mRNA [XM_006719983]	348013	GO:0016021	114515195	chr13	114515136	+	hs|13q34	XM_006719983	chr13:114515136-114515195	XM_006719983
A_23_P119698	-3.00988	-1.58971	3.00988	down	CD320 molecule	CD320	FALSE	Homo sapiens CD320 molecule (CD320), transcript variant 1, mRNA [NM_016579]	51293	GO:0009235|GO:0031419|GO:0005886|GO:0006766|GO:0005783|GO:0006767|GO:0044281|GO:0016021|GO:0008083|GO:0001558|GO:0010008|GO:0070062	8367394	chr19	8367335	-	hs|19p13.2	NM_016579	chr19:8367394-8367335	NM_016579	Hs.558499
A_24_P391586	-3.00753	-1.58858	3.00753	down	OAF homolog (Drosophila)	OAF	FALSE	Homo sapiens OAF homolog (Drosophila) (OAF), mRNA [NM_178507]	220323	GO:0070062	120100232	chr11	120100173	+	hs|11q23.3	NM_178507	chr11:120100173-120100232	NM_178507	Hs.445081
A_24_P686965	-3.00297	-1.58639	3.00297	down	SH2 domain containing 5	SH2D5	FALSE	Homo sapiens SH2 domain containing 5 (SH2D5), transcript variant 1, mRNA [NM_001103161]	400745		21046321	chr1	21046262	-	hs|1p36.12	NM_001103161	chr1:21046321-21046262	NM_001103161	Hs.591522
A_24_P245379	-3.00073	-1.58531	3.00073	down	serpin peptidase inhibitor, clade B (ovalbumin), member 2	SERPINB2	FALSE	Homo sapiens serpin peptidase inhibitor, clade B (ovalbumin), member 2 (SERPINB2), transcript variant 2, mRNA [NM_002575]	5055	GO:0030162|GO:0010951|GO:0043066|GO:0005737|GO:0005886|GO:0007596|GO:0004867|GO:0005576|GO:0042730|GO:0005615	61570261	chr18	61570202	+	hs|18q21.33	NM_002575	chr18:61570202-61570261	NM_002575	Hs.594481
A_23_P45560	-2.99945	-1.5847	2.99945	down	G protein-coupled receptor 143	GPR143	FALSE	Homo sapiens G protein-coupled receptor 143 (GPR143), mRNA [NM_000273]	4935	GO:0005515|GO:0033162|GO:0072544|GO:0072545|GO:0006726|GO:0035584|GO:0005886|GO:0032438|GO:0032400|GO:0005765|GO:0032402|GO:0005737|GO:0016324|GO:0007218|GO:0050848|GO:0042470|GO:0005794|GO:0004930|GO:0048015|GO:0035240|GO:0007165|GO:0016020|GO:0007186|GO:0016021|GO:0007601|GO:0035643	9693758	chrX	9693699	-	hs|Xp22.2	NM_000273	chrX:9693758-9693699	NM_000273	Hs.74124
A_33_P3565787	-2.991	-1.58063	2.991	down	PSMG3 antisense RNA 1 (head to head)	PSMG3-AS1	FALSE	Homo sapiens PSMG3 antisense RNA 1 (head to head) (PSMG3-AS1), transcript variant 1, long non-coding RNA [NR_027329]	114796		1626180	chr7	1626121	+	hs|7p22.3	NR_027329	chr7:1626121-1626180	NR_027329	Hs.436146
A_23_P134426	-2.98833	-1.57934	2.98833	down	glycoprotein (transmembrane) nmb	GPNMB	FALSE	Homo sapiens glycoprotein (transmembrane) nmb (GPNMB), transcript variant 1, mRNA [NM_001005340]	10457	GO:0042470|GO:0008285|GO:0005178|GO:0005887|GO:0030282|GO:0016021|GO:0007155|GO:0008201|GO:0001649	23314555	chr7	23314496	+	hs|7p15.3	NM_001005340	chr7:23314496-23314555	NM_001005340	Hs.190495
A_24_P342632	-2.98555	-1.57799	2.98555	down	adenylate kinase 5	AK5	FALSE	Homo sapiens adenylate kinase 5 (AK5), transcript variant 1, mRNA [NM_174858]	26289	GO:0046034|GO:0015949|GO:0005815|GO:0004550|GO:0009220|GO:0055086|GO:0044281|GO:0004017|GO:0009142|GO:0019206|GO:0005524|GO:0005829|GO:0006165|GO:0005737|GO:0006172|GO:0006173	78025105	chr1	78025046	+	hs|1p31.1	NM_174858	chr1:78025046-78025105	NM_174858	Hs.559718
A_33_P3312658	-2.98302	-1.57678	2.98302	down			FALSE	Q9BVW3_HUMAN (Q9BVW3) Kynureninase (L-kynurenine hydrolase), isoform b, partial (40%) [THC2613185]			143704932	chr2	143704873	+	hs|2q22.2		chr2:143704873-143704932
A_32_P191441	-2.98079	-1.5757	2.98079	down	chromosome 10 open reading frame 90	C10orf90	FALSE	Homo sapiens chromosome 10 open reading frame 90 (C10orf90), mRNA [NM_001004298]	118611	GO:0007095|GO:0030308|GO:0005813|GO:0005737|GO:0042826|GO:0010212|GO:0050821|GO:0015629|GO:0009411	128113805	chr10	128113746	-	hs|10q26.2	NM_001004298	chr10:128113805-128113746	NM_001004298	Hs.587663
A_24_P13475	-2.97966	-1.57515	2.97966	down	spermatogenesis associated 13	SPATA13	FALSE	Homo sapiens spermatogenesis associated 13 (SPATA13), transcript variant 3, mRNA [NM_001286792]	221178	GO:0005515|GO:0030334|GO:0030032|GO:0005730|GO:0005634|GO:0032587|GO:0030175|GO:0043087|GO:0030027|GO:0005085|GO:0005737|GO:0032314|GO:0016477|GO:0046847|GO:0030676	24880466	chr13	24880407	+	hs|13q12.12	NM_001286792	chr13:24880407-24880466	NM_001286792	Hs.595391
A_23_P38041	-2.97163	-1.57125	2.97163	down	N-acetylglucosamine-1-phosphodiester alpha-N-acetylglucosaminidase	NAGPA	FALSE	Homo sapiens N-acetylglucosamine-1-phosphodiester alpha-N-acetylglucosaminidase (NAGPA), mRNA [NM_016256]	51172	GO:0005975|GO:0003944|GO:0032580|GO:0006622|GO:0006486|GO:0016021|GO:0007040|GO:0006464	5075069	chr16	5075010	-	hs|16p13.3	NM_016256	chr16:5075069-5075010	NM_016256	Hs.21334
A_23_P34537	-2.95832	-1.56478	2.95832	down	epoxide hydrolase 1, microsomal (xenobiotic)	EPHX1	FALSE	Homo sapiens epoxide hydrolase 1, microsomal (xenobiotic) (EPHX1), transcript variant 1, mRNA [NM_000120]	2052	GO:0014070|GO:0033961|GO:0019439|GO:0005789|GO:0009636|GO:0016021|GO:0004301	226032942	chr1	226032883	+	hs|1q42.12	NM_000120	chr1:226032883-226032942	NM_000120	Hs.89649
A_23_P27306	-2.95287	-1.56212	2.95287	down	collectin sub-family member 12	COLEC12	FALSE	Homo sapiens collectin sub-family member 12 (COLEC12), mRNA [NM_130386]	81035	GO:0005581|GO:0005886|GO:0030169|GO:0006952|GO:0006910|GO:0046872|GO:0006898|GO:0030666|GO:0002221|GO:0009756|GO:0005534|GO:0045087|GO:0051260|GO:0016021|GO:0070062|GO:0005044|GO:0008329	319757	chr18	319698	-	hs|18p11.32	NM_130386	chr18:319757-319698	NM_130386	Hs.464422
A_32_P86763	-2.95063	-1.56102	2.95063	down	transglutaminase 2	TGM2	FALSE	Homo sapiens transglutaminase 2 (TGM2), transcript variant 1, mRNA [NM_004613]	7052	GO:0005515|GO:0043065|GO:0005886|GO:0019904|GO:0043277|GO:0005525|GO:0048661|GO:0046872|GO:0045785|GO:0005829|GO:0005739|GO:0051561|GO:0001974|GO:0051482|GO:0003810|GO:0050729|GO:0051260|GO:0018153|GO:0060662|GO:0043123|GO:0032471|GO:0070062|GO:0060445	36757912	chr20	36757853	-	hs|20q11.23	NM_004613	chr20:36757912-36757853	NM_004613	Hs.517033
A_33_P3359428	-2.94609	-1.5588	2.94609	down			FALSE				65482588	chr8	65482529	-	hs|8q12.3		chr8:065482588-065482529
A_23_P103104	-2.94456	-1.55805	2.94456	down	MFNG O-fucosylpeptide 3-beta-N-acetylglucosaminyltransferase	MFNG	FALSE	Homo sapiens MFNG O-fucosylpeptide 3-beta-N-acetylglucosaminyltransferase (MFNG), transcript variant 1, mRNA [NM_002405]	4242	GO:0045747|GO:0033829|GO:0007389|GO:0030173|GO:0008152|GO:0005615|GO:0046872|GO:0032092	37865384	chr22	37865325	-	hs|22q13.1	NM_002405	chr22:37865384-37865325	NM_002405	Hs.517603
A_23_P207445	-2.93995	-1.55579	2.93995	down	mitogen-activated protein kinase kinase 6	MAP2K6	FALSE	Homo sapiens mitogen-activated protein kinase kinase 6 (MAP2K6), mRNA [NM_002758]	5608	GO:0005515|GO:0034142|GO:0070423|GO:0060048|GO:0051403|GO:0035872|GO:0005829|GO:0042692|GO:0002756|GO:0000187|GO:0005737|GO:0004702|GO:0002755|GO:0007050|GO:0005856|GO:0072709|GO:0034138|GO:0004708|GO:0006355|GO:0043065|GO:0038124|GO:0038123|GO:0019901|GO:0042493|GO:0034134|GO:0006915|GO:0018108|GO:0002224|GO:0005524|GO:0006351|GO:0006975|GO:0007165|GO:0051149|GO:0045087|GO:0002931|GO:0035666|GO:…	67538021	chr17	67537962	+	hs|17q24.3	NM_002758	chr17:67537962-67538021	NM_002758	Hs.463978
A_24_P150466	-2.93815	-1.55491	2.93815	down	SPARC related modular calcium binding 1	SMOC1	FALSE	Homo sapiens SPARC related modular calcium binding 1 (SMOC1), transcript variant 1, mRNA [NM_001034852]	64093	GO:0005515|GO:0007165|GO:0045667|GO:0030198|GO:0001654|GO:0010811|GO:0005509|GO:0050840|GO:0060173|GO:0030154|GO:0005604	70498841	chr14	70498782	+	hs|14q24.2	NM_001034852	chr14:70498782-70498841	NM_001034852	Hs.497349
A_33_P3368985	-2.93553	-1.55362	2.93553	down	ankyrin repeat domain 30A	ANKRD30A	FALSE	Homo sapiens ankyrin repeat domain 30A (ANKRD30A), mRNA [NM_052997]	91074	GO:0006355|GO:0003700|GO:0005634|GO:0003677	37482180	chr10	37482121	+	hs|10p11.21	NM_052997	chr10:37482121-37482180	NM_052997	Hs.373787
A_23_P212119	-2.93298	-1.55237	2.93298	down	polypeptide N-acetylgalactosaminyltransferase 15	GALNT15	FALSE	Homo sapiens polypeptide N-acetylgalactosaminyltransferase 15 (GALNT15), mRNA [NM_054110]	117248	GO:0030133|GO:0004653|GO:0000139|GO:0016266|GO:0016021|GO:0044267|GO:0046872|GO:0043687	16269863	chr3	16269804	+	hs|3p25.1	NM_054110	chr3:16269804-16269863	NM_054110	Hs.411308
A_33_P3412945	-2.93178	-1.55177	2.93178	down	serine/arginine-rich splicing factor 2	SRSF2	FALSE	Homo sapiens serine/arginine-rich splicing factor 2 (SRSF2), transcript variant 1, mRNA [NM_003016]	6427	GO:0005515|GO:0006397|GO:0008380|GO:0006369|GO:0010467|GO:0006366|GO:0003714|GO:0031124|GO:0005634|GO:0006406|GO:0016607|GO:0000166|GO:0000398|GO:0016605|GO:0005654|GO:2001141|GO:0070062	74732291	chr17	74732232	-	hs|17q25.1	NM_003016	chr17:74732291-74732232	NM_003016	Hs.584801
A_33_P3344911	-2.92914	-1.55048	2.92914	down	protein tyrosine phosphatase, receptor type, Q	PTPRQ	FALSE	Homo sapiens protein tyrosine phosphatase, receptor type, Q (PTPRQ), mRNA [NM_001145026]	374462	GO:0042472|GO:0045598|GO:0016021|GO:0035335|GO:0004725	81067024	chr12	81066965	+	hs|12q21.31	NM_001145026	chr12:81066965-81067024	NM_001145026	Hs.539284
A_23_P134113	-2.92757	-1.54971	2.92757	down	solute carrier family 18, subfamily B, member 1	SLC18B1	FALSE	Homo sapiens solute carrier family 18, subfamily B, member 1 (SLC18B1), mRNA [NM_052831]	116843	GO:0016021|GO:0055085	133090609	chr6	133090550	-	hs|6q23.2	NM_052831	chr6:133090609-133090550	NM_052831	Hs.347144
A_24_P291658	-2.92717	-1.5495	2.92717	down	alcohol dehydrogenase 1A (class I), alpha polypeptide	ADH1A	FALSE	Homo sapiens alcohol dehydrogenase 1A (class I), alpha polypeptide (ADH1A), mRNA [NM_000667]	124	GO:0005515|GO:0004022|GO:0006805|GO:0017144|GO:0006066|GO:0006069|GO:0004024|GO:0008270|GO:0044281|GO:0005829	100200647	chr4	100200588	-	hs|4q23	NM_000667	chr4:100200647-100200588	NM_000667	Hs.654433
A_33_P3422728	-2.92201	-1.54696	2.92201	down	contactin associated protein-like 3	CNTNAP3	FALSE	Homo sapiens contactin associated protein-like 3 (CNTNAP3), mRNA [NM_033655]	79937	GO:0008037|GO:0005886|GO:0005576|GO:0016021|GO:0007155	39086775	chr9	39086716	-	hs|9p13.1	NM_033655	chr9:39086775-39086716	NM_033655	Hs.128474
A_23_P76749	-2.91913	-1.54554	2.91913	down	polypeptide N-acetylgalactosaminyltransferase 16	GALNT16	FALSE	Homo sapiens polypeptide N-acetylgalactosaminyltransferase 16 (GALNT16), transcript variant 2, mRNA [NM_020692]	57452	GO:0004653|GO:0000139|GO:0006486|GO:0016021|GO:0046872|GO:0070062	69821130	chr14	69821071	+	hs|14q24.1	NM_020692	chr14:69821071-69821130	NM_020692	Hs.21035
A_33_P3240295	-2.91445	-1.54323	2.91445	down			FALSE				74534419	chr2	74534360	-	hs|2p13.1		chr2:074534419-074534360
A_33_P3384900	-2.90696	-1.53951	2.90696	down	small nuclear ribonucleoprotein D2 pseudogene 2	SNRPD2P2	FALSE	Homo sapiens small nuclear ribonucleoprotein D2 pseudogene 2 (SNRPD2P2), non-coding RNA [NR_033826]	645339		231611762	chr1	231611703	-	hs|1q42.2	NR_033826	chr1:231611762-231611703	NR_033826	Hs.382049
A_24_P357266	-2.90459	-1.53834	2.90459	down	gastrin-releasing peptide receptor	GRPR	FALSE	Homo sapiens gastrin-releasing peptide receptor (GRPR), mRNA [NM_005314]	2925	GO:0004946|GO:0031989|GO:0007186|GO:0005886|GO:0008283|GO:0005887|GO:0042127|GO:0008528	16171110	chrX	16171051	+	hs|Xp22.2	NM_005314	chrX:16171051-16171110	NM_005314	Hs.567282
A_23_P90601	-2.90437	-1.53822	2.90437	down	STEAP family member 3, metalloreductase	STEAP3	FALSE	Homo sapiens STEAP family member 3, metalloreductase (STEAP3), transcript variant 1, mRNA [NM_182915]	55240	GO:0005515|GO:0009306|GO:0043065|GO:0000293|GO:0005886|GO:0005771|GO:0006915|GO:0055085|GO:0046872|GO:0006879|GO:0033572|GO:0007049|GO:0016021|GO:0010008|GO:0055114	120023057	chr2	120022998	+	hs|2q14.2	NM_182915	chr2:120022998-120023057	NM_182915	Hs.647822
A_23_P204751	-2.90309	-1.53759	2.90309	down	acid-sensing (proton-gated) ion channel 1	ASIC1	FALSE	Homo sapiens acid-sensing (proton-gated) ion channel 1 (ASIC1), transcript variant 1, mRNA [NM_020039]	41	GO:0005515|GO:0008306|GO:0022839|GO:0005886|GO:0009986|GO:0045202|GO:0050915|GO:0055085|GO:0046929|GO:0071467|GO:0070207|GO:0007165|GO:0015280|GO:0034220|GO:0005887|GO:0042391|GO:0070588|GO:0006810|GO:0001101|GO:0035725|GO:0007613|GO:0006814|GO:0009268	50477337	chr12	50477278	+	hs|12q13.12	NM_020039	chr12:50477278-50477337	NM_020039	Hs.274361
A_23_P252471	-2.90002	-1.53606	2.90002	down	platelet/endothelial cell adhesion molecule 1	PECAM1	FALSE	Homo sapiens platelet/endothelial cell adhesion molecule 1 (PECAM1), mRNA [NM_000442]	5175	GO:0072011|GO:0005515|GO:0006909|GO:0008037|GO:0030054|GO:0005886|GO:0030168|GO:0050900|GO:0005615|GO:0050904|GO:0007165|GO:0007596|GO:0030198|GO:0002576|GO:0031092|GO:0016021|GO:0007155|GO:0070062	62400603	chr17	62400544	-	hs|17q23.3	NM_000442	chr17:62400603-62400544	NM_000442	Hs.376675
A_33_P3308534	-2.89994	-1.53602	2.89994	down	oxysterol binding protein-like 1A	OSBPL1A	FALSE	Homo sapiens oxysterol binding protein-like 1A (OSBPL1A), transcript variant 2, mRNA [NM_080597]	114876	GO:0005515|GO:0005770|GO:0005730|GO:0005634|GO:0005765|GO:0005622|GO:0019886|GO:0005737|GO:0005543|GO:0015485|GO:0006869|GO:0016192|GO:0070062|GO:0008203	21948329	chr18	21948270	-	hs|18q11.2	NM_080597	chr18:21948329-21948270	NM_080597	Hs.370725
A_23_P307392	-2.89009	-1.53111	2.89009	down	uncharacterized LOC102725171	LOC102725171	FALSE	PREDICTED: Homo sapiens uncharacterized LOC102725171 (LOC102725171), ncRNA [XR_432995]	102725171		73075947	chr14	73075888	-	hs|14q24.2	XR_432995	chr14:73075947-73075888	XR_432995	Hs.162868
A_33_P3317453	-2.89005	-1.53109	2.89005	down			FALSE	Q8N1G1_HUMAN (Q8N1G1) Transcription elongation factor B polypeptide 3 binding protein 1, partial (3%) [THC2636181]			1824782	chr19	1824723	+	hs|19p13.3		chr19:001824723-001824782
A_23_P201035	-2.8899	-1.53102	2.8899	down	glucosidase, beta, acid	GBA	FALSE	Homo sapiens glucosidase, beta, acid (GBA), transcript variant 2, mRNA [NM_001005741]	2629	GO:0005515|GO:0008219|GO:0043627|GO:0097066|GO:0032715|GO:0004348|GO:0044281|GO:0005765|GO:0043407|GO:0071356|GO:0046513|GO:0046512|GO:0009268|GO:0043202|GO:0070062|GO:0006665|GO:0006687|GO:0005975|GO:0035307|GO:0005102|GO:0051384|GO:0033574|GO:0006680|GO:0050728|GO:0033561|GO:0043589|GO:0023021	155204686	chr1	155204627	-	hs|1q22	NM_001005741	chr1:155204686-155204627	NM_001005741	Hs.282997
A_23_P411772	-2.88747	-1.52981	2.88747	down	protocadherin gamma subfamily B, 2	PCDHGB2	FALSE	Homo sapiens protocadherin gamma subfamily B, 2 (PCDHGB2), transcript variant 2, mRNA [NM_032096]	56103	GO:0005886|GO:0005509|GO:0016021|GO:0007156	140742054	chr5	140741995	+	hs|5q31.3	NM_032096	chr5:140741995-140742054	NM_032096	Hs.368160
A_33_P3376925	-2.88478	-1.52846	2.88478	down			FALSE				93574816	chrX	93574757	+	hs|Xq21.33		chrX:093574757-093574816
A_33_P3279640	-2.88469	-1.52842	2.88469	down	hyperpolarization activated cyclic nucleotide-gated potassium channel 2	HCN2	FALSE	Homo sapiens hyperpolarization activated cyclic nucleotide-gated potassium channel 2 (HCN2), mRNA [NM_001194]	610	GO:0005886|GO:0005222|GO:0005248|GO:0007267|GO:0007268|GO:0042802|GO:0030552|GO:0005887|GO:0005249|GO:0008076|GO:0042391|GO:0034765|GO:0035725|GO:0071320|GO:0071805|GO:0071321	617157	chr19	617098	+	hs|19p13.3	NM_001194	chr19:617098-617157	NM_001194	Hs.124161
A_23_P3221	-2.88107	-1.5266	2.88107	down	sulfide quinone reductase-like (yeast)	SQRDL	FALSE	Homo sapiens sulfide quinone reductase-like (yeast) (SQRDL), transcript variant 1, mRNA [NM_021199]	58472	GO:0034641|GO:0070224|GO:0000096|GO:0000098|GO:0005743|GO:0044281|GO:0070221	45983423	chr15	45983364	+	hs|15q21.1	NM_021199	chr15:45983364-45983423	NM_021199	Hs.511251
A_33_P3331233	-2.87936	-1.52575	2.87936	down			FALSE	immunoglobulin heavy variable 3/OR16-13 (non-functional) [Source:HGNC Symbol;Acc:5637] [ENST00000562905]			33630041	chr16	33629982	+	hs|16p11.2	TCONS_l2_00009699	chr16:33629982-33630041		Hs.595878
A_32_P176018	-2.87765	-1.52489	2.87765	down	actin-like 8	ACTL8	FALSE	Homo sapiens actin-like 8 (ACTL8), mRNA [NM_030812]	81569	GO:0005737|GO:0030855|GO:0005856	18153449	chr1	18153390	+	hs|1p36.13	NM_030812	chr1:18153390-18153449	NM_030812	Hs.2149
A_23_P29005	-2.87388	-1.523	2.87388	down	SAM domain, SH3 domain and nuclear localization signals 1	SAMSN1	FALSE	Homo sapiens SAM domain, SH3 domain and nuclear localization signals 1 (SAMSN1), transcript variant 1, mRNA [NM_022136]	64092	GO:0005737|GO:0050869|GO:0050732|GO:0005634|GO:0001784|GO:0002820|GO:0001726	15858344	chr21	15858285	-	hs|21q11.2	NM_022136	chr21:15858344-15858285	NM_022136	Hs.473341
A_23_P103011	-2.87302	-1.52257	2.87302	down	RAB36, member RAS oncogene family	RAB36	FALSE	Homo sapiens RAB36, member RAS oncogene family (RAB36), mRNA [NM_004914]	9609	GO:0005794|GO:0000139|GO:0007264|GO:0015031|GO:0005525	23506487	chr22	23506428	+	hs|22q11.23	NM_004914	chr22:23506428-23506487	NM_004914	Hs.369557
A_23_P310022	-2.87075	-1.52143	2.87075	down	KIAA1217	KIAA1217	FALSE	Homo sapiens KIAA1217 (KIAA1217), transcript variant 1, mRNA [NM_019590]	56243	GO:0003674|GO:0005737|GO:0048706	24836518	chr10	24836459	+	hs|10p12.1	NM_019590	chr10:24836459-24836518	NM_019590	Hs.445885
A_33_P3220475	-2.87046	-1.52128	2.87046	down	uncharacterized protein FLJ23867	FLJ23867	FALSE	Homo sapiens uncharacterized protein FLJ23867 (FLJ23867), long non-coding RNA [NR_026900]	200058		180169854	chr1	180169795	+	hs|1q25.2	NR_026900	chr1:180169795-180169854	NR_026900	Hs.719176
A_19_P00812340	-2.86963	-1.52087	2.86963	down	ferritin, light polypeptide	FTL	FALSE	Homo sapiens ferritin, light polypeptide (FTL), mRNA [NM_000146]	2512	GO:0005515|GO:0008219|GO:0005506|GO:0006892|GO:0055072|GO:0055085|GO:0005829|GO:0008199|GO:0042802|GO:0006879|GO:0008043|GO:0006826|GO:0061024|GO:0070062	49469919	chr19	49469860	+	hs|19q13.33	NM_000146	chr19:49469860-49469919	NM_000146	Hs.433670
A_19_P00326525	-2.86629	-1.51918	2.86629	down			FALSE				72034872	chr6	72034813	-	hs|6q13		chr6:072034872-072034813
A_23_P142389	-2.86254	-1.51729	2.86254	down	lipolysis stimulated lipoprotein receptor	LSR	FALSE	Homo sapiens lipolysis stimulated lipoprotein receptor (LSR), transcript variant 2, mRNA [NM_205834]	51599	GO:0034361|GO:0001889|GO:0005886|GO:0034362|GO:0042627|GO:0016021|GO:0009790|GO:0070062|GO:0019216	35758493	chr19	35758434	+	hs|19q13.12	NM_205834	chr19:35758434-35758493	NM_205834	Hs.466507
A_33_P3334220	-2.86161	-1.51683	2.86161	down	acetyl-CoA carboxylase beta	ACACB	FALSE	Homo sapiens acetyl-CoA carboxylase beta (ACACB), mRNA [NM_001093]	32	GO:0005515|GO:0014070|GO:0042493|GO:0006853|GO:0006768|GO:0006767|GO:0005741|GO:0044281|GO:2001295|GO:0005524|GO:0006084|GO:0046872|GO:0012505|GO:0005829|GO:0031325|GO:0006112|GO:0051289|GO:0006766|GO:0009374|GO:0004075|GO:0006633|GO:0003989|GO:0044255	109706028	chr12	109705969	+	hs|12q24.11	NM_001093	chr12:109705969-109706028	NM_001093	Hs.234898
A_33_P3293593	-2.86044	-1.51624	2.86044	down	tetratricopeptide repeat domain 9B	TTC9B	FALSE	Homo sapiens tetratricopeptide repeat domain 9B (TTC9B), mRNA [NM_152479]	148014	GO:0000413|GO:0008150|GO:0003674|GO:0061077|GO:0005789|GO:0003755|GO:0005528|GO:0005575	40722025	chr19	40721966	-	hs|19q13.2	NM_152479	chr19:40722025-40721966	NM_152479	Hs.631572
A_33_P3780572	-2.85618	-1.51409	2.85618	down	long intergenic non-protein coding RNA 1060	LINC01060	FALSE	long intergenic non-protein coding RNA 1060 [Source:HGNC Symbol;Acc:49081] [ENST00000510832]	401164		189459704	chr4	189459645	+	hs|4q35.2	AK095968	chr4:189459645-189459704		Hs.435756
A_24_P200023	-2.85325	-1.51261	2.85325	down	interleukin 1 receptor, type I	IL1R1	FALSE	Homo sapiens interleukin 1 receptor, type I (IL1R1), transcript variant 1, mRNA [NM_000877]	3554	GO:0005515|GO:0005886|GO:0009986|GO:0050727|GO:0005576|GO:0002020|GO:0005161|GO:0004909|GO:0006955|GO:0016020|GO:0005887|GO:0004908|GO:0004871|GO:0070555|GO:0070498|GO:0007166|GO:0004888	102795453	chr2	102795394	+	hs|2q12.1	NM_000877	chr2:102795394-102795453	NM_000877	Hs.701982
A_23_P53193	-2.85292	-1.51244	2.85292	down	synaptotagmin-like 2	SYTL2	FALSE	Homo sapiens synaptotagmin-like 2 (SYTL2), transcript variant a, mRNA [NM_032943]	54843	GO:0005515|GO:0042470|GO:0017137|GO:0005794|GO:0005886|GO:0019902|GO:0005546|GO:0005634|GO:0006887|GO:0042043|GO:0006886|GO:0006904|GO:0005737|GO:0016020|GO:0010923|GO:0001786|GO:0016192|GO:0070382|GO:0019897	85406136	chr11	85406077	-	hs|11q14.1	NM_032943	chr11:85406136-85406077	NM_032943	Hs.369520
A_23_P315836	-2.84985	-1.51089	2.84985	down	BAI1-associated protein 2	BAIAP2	FALSE	Homo sapiens BAI1-associated protein 2 (BAIAP2), transcript variant 2, mRNA [NM_017451]	10458	GO:0008286|GO:0005515|GO:0043005|GO:0017124|GO:0005886|GO:0008360|GO:0007409|GO:0030175|GO:0015629|GO:0005829|GO:0042802|GO:0009617|GO:0005737|GO:0048167|GO:0032956|GO:0046847|GO:0051764|GO:0070064|GO:0051017|GO:0008093|GO:0070062|GO:0008022|GO:0001726|GO:0016358|GO:0045087|GO:0038096	79091112	chr17	79091053	+	hs|17q25.3	NM_017451	chr17:79091053-79091112	NM_017451	Hs.128316
A_23_P41854	-2.84853	-1.51022	2.84853	down	caspase recruitment domain family, member 6	CARD6	FALSE	Homo sapiens caspase recruitment domain family, member 6 (CARD6), mRNA [NM_032587]	84674	GO:0005622|GO:0006915|GO:0042981	40855404	chr5	40855345	+	hs|5p13.1	NM_032587	chr5:40855345-40855404	NM_032587	Hs.200242
A_23_P61487	-2.84763	-1.50976	2.84763	down	leucine rich repeat containing 20	LRRC20	FALSE	Homo sapiens leucine rich repeat containing 20 (LRRC20), transcript variant 3, mRNA [NM_018205]	55222		72058832	chr10	72058773	-	hs|10q22.1	NM_018205	chr10:72058832-72058773	NM_018205	Hs.7778
A_23_P218058	-2.84719	-1.50954	2.84719	down	killer cell lectin-like receptor subfamily C, member 4	KLRC4	FALSE	Homo sapiens killer cell lectin-like receptor subfamily C, member 4 (KLRC4), mRNA [NM_013431]	8302	GO:0006968|GO:0016021	10560299	chr12	10560240	-	hs|12p13.2	NM_013431	chr12:10560299-10560240	NM_013431	Hs.721094
A_23_P117797	-2.84574	-1.5088	2.84574	down	ceroid-lipofuscinosis, neuronal 6, late infantile, variant	CLN6	FALSE	Homo sapiens ceroid-lipofuscinosis, neuronal 6, late infantile, variant (CLN6), mRNA [NM_017882]	54982	GO:0044265|GO:0005515|GO:0008219|GO:0005783|GO:0031987|GO:0005730|GO:0005634|GO:0045862|GO:0042803|GO:0043231|GO:0030163|GO:0001573|GO:0005789|GO:0005788|GO:0007042|GO:0016021|GO:0030203|GO:0007601|GO:0008203	68500008	chr15	68499949	-	hs|15q23	NM_017882	chr15:68500008-68499949	NM_017882	Hs.584921
A_33_P3246883	-2.83975	-1.50576	2.83975	down	dermokine	DMKN	FALSE	Homo sapiens dermokine (DMKN), transcript variant 2, mRNA [NM_033317]	93099	GO:0005515|GO:0005615|GO:0070062	35990920	chr19	35990861	-	hs|19q13.12	NM_033317	chr19:35990920-35990861	NM_033317	Hs.417795
A_23_P152791	-2.83805	-1.5049	2.83805	down	solute carrier family 16, member 6	SLC16A6	FALSE	Homo sapiens solute carrier family 16, member 6 (SLC16A6), transcript variant 2, mRNA [NM_004694]	9120	GO:0015718|GO:0016020|GO:0005887|GO:0008028|GO:0055085|GO:0015293	66264963	chr17	66264904	-	hs|17q24.2	NM_004694	chr17:66264963-66264904	NM_004694	Hs.42645
A_23_P101407	-2.8338	-1.50274	2.8338	down	complement component 3	C3	FALSE	Homo sapiens complement component 3 (C3), mRNA [NM_000064]	718	GO:0005515|GO:0030449|GO:0005886|GO:0004866|GO:0072562|GO:0001970|GO:0005615|GO:0006957|GO:0006956|GO:0006955|GO:0006954|GO:0006958|GO:0006631|GO:0001798|GO:0070062|GO:0045745|GO:2000427|GO:0005102|GO:0005576|GO:0010884|GO:0010866|GO:0010575|GO:0031715|GO:0045766|GO:0010828|GO:0010951|GO:0007165|GO:0007186|GO:0045087|GO:0050776|GO:0001934	6679434	chr19	6679177	-	hs|19p13.3	NM_000064	chr19:6679434-6679177	NM_000064	Hs.529053
A_19_P00315779	-2.83339	-1.50253	2.83339	down			FALSE				86632724	chr11	86632665	-	hs|11q14.2		chr11:086632724-086632665
A_33_P3219591	-2.83073	-1.50118	2.83073	down	ring finger protein 213	RNF213	FALSE	Homo sapiens ring finger protein 213 (RNF213), transcript variant 2, mRNA [NM_020954]	57674	GO:0005737|GO:0004842|GO:0016567|GO:0006200|GO:0000166|GO:0016874|GO:0008270|GO:0016887|GO:0051865	78295258	chr17	78295199	+	hs|17q25.3	NM_020954	chr17:78295199-78295258	NM_020954	Hs.740662
A_19_P00324821	-2.82949	-1.50054	2.82949	down			FALSE				72034782	chr6	72034723	-	hs|6q13		chr6:072034782-072034723
A_33_P3637909	-2.82634	-1.49893	2.82634	down	ubiquitin-conjugating enzyme E2D 4 (putative)	UBE2D4	FALSE	Homo sapiens ubiquitin-conjugating enzyme E2D 4 (putative) (UBE2D4), mRNA [NM_015983]	51619	GO:0035519|GO:0005515|GO:0085020|GO:0070534|GO:0004842|GO:0070979|GO:0016881|GO:0070936|GO:0044314|GO:0005524	43995694	chr7	43995635	+	hs|7p13	NM_015983	chr7:43995635-43995694	NM_015983	Hs.19196
A_23_P254254	-2.82527	-1.49839	2.82527	down	N-sulfoglucosamine sulfohydrolase	SGSH	FALSE	Homo sapiens N-sulfoglucosamine sulfohydrolase (SGSH), mRNA [NM_000199]	6448	GO:0005975|GO:0006027|GO:0044281|GO:0016250|GO:0008484|GO:0006029|GO:0003824|GO:0030203|GO:0046872|GO:0070062|GO:0043202	78183396	chr17	78183337	-	hs|17q25.3	NM_000199	chr17:78183396-78183337	NM_000199	Hs.31074
A_23_P128084	-2.82443	-1.49796	2.82443	down	integrin, alpha 7	ITGA7	FALSE	Homo sapiens integrin, alpha 7 (ITGA7), transcript variant 2, mRNA [NM_002206]	3679	GO:0031594|GO:0046982|GO:0005886|GO:0009986|GO:0008360|GO:0048514|GO:0034677|GO:0046872|GO:0042383|GO:0005737|GO:0005178|GO:0007517|GO:0007160|GO:0016477|GO:0007229|GO:0007519|GO:0030198|GO:0043236|GO:0005927	56078479	chr12	56078420	-	hs|12q13.2	NM_002206	chr12:56078479-56078420	NM_002206	Hs.524484
A_33_P3390758	-2.82401	-1.49775	2.82401	down	heat shock 70kDa protein 8	HSPA8	FALSE	Homo sapiens heat shock 70kDa protein 8 (HSPA8), transcript variant 2, mRNA [NM_153201]	3312	GO:0005515|GO:0006986|GO:0008380|GO:0010467|GO:0042623|GO:0006200|GO:0005886|GO:0007268|GO:0072562|GO:0005634|GO:0005615|GO:0007269|GO:0005829|GO:0005622|GO:0042026|GO:0006457|GO:0007411|GO:0031072|GO:0051726|GO:0061024|GO:0016032|GO:0005681|GO:0016887|GO:0070062|GO:0006397|GO:0000974|GO:0042470|GO:0016070|GO:0016071|GO:0005730|GO:0006892|GO:0005524|GO:0006351|GO:0030529|GO:0051085|GO:0023026|GO:…	122929537	chr11	122929478	-	hs|11q24.1	NM_153201	chr11:122929537-122929478	NM_153201	Hs.180414
A_33_P3390013	-2.8188	-1.49508	2.8188	down	ADAM metallopeptidase with thrombospondin type 1 motif, 1	ADAMTS1	FALSE	Homo sapiens ADAM metallopeptidase with thrombospondin type 1 motif, 1 (ADAMTS1), mRNA [NM_006988]	9510	GO:0008285|GO:0001822|GO:0001542|GO:0031410|GO:0005604|GO:0060347|GO:0005737|GO:0007229|GO:0006508|GO:0008270|GO:0004222|GO:0008201|GO:0008237	28209959	chr21	28209900	-	hs|21q21.3	NM_006988	chr21:28209959-28209900	NM_006988	Hs.643357
A_24_P37253	-2.81666	-1.49399	2.81666	down	LY6/PLAUR domain containing 6	LYPD6	FALSE	Homo sapiens LY6/PLAUR domain containing 6 (LYPD6), transcript variant 2, mRNA [NM_194317]	130574	GO:0005576	150330002	chr2	150329943	+	hs|2q23.2	NM_194317	chr2:150329943-150330002	NM_194317	Hs.21929
A_24_P160401	-2.81357	-1.4924	2.81357	down	CUB domain containing protein 1	CDCP1	FALSE	Homo sapiens CUB domain containing protein 1 (CDCP1), transcript variant 2, mRNA [NM_178181]	64866	GO:0005886|GO:0005576|GO:0016021	45153600	chr3	45152300	-	hs|3p21.31	NM_178181	chr3:45153600-45152300	NM_178181	Hs.476093
A_23_P143535	-2.81253	-1.49187	2.81253	down	WD repeat domain 4	WDR4	FALSE	Homo sapiens WD repeat domain 4 (WDR4), transcript variant 2, mRNA [NM_033661]	10785	GO:0005515|GO:0005737|GO:0030488|GO:0008176|GO:0005654|GO:0005634|GO:0006400	44270319	chr21	44270260	-	hs|21q22.3	NM_033661	chr21:44270319-44270260	NM_033661	Hs.248815
A_24_P257416	-2.81038	-1.49076	2.81038	down	chemokine (C-X-C motif) ligand 2	CXCL2	FALSE	Homo sapiens chemokine (C-X-C motif) ligand 2 (CXCL2), mRNA [NM_002089]	2920	GO:0005515|GO:0008009|GO:0006955|GO:0006954|GO:0006935|GO:0060326|GO:0002237|GO:0005576|GO:0005615	74964401	chr4	74964342	-	hs|4q13.3	NM_002089	chr4:74964401-74964342	NM_002089	Hs.75765
A_33_P3236686	-2.80977	-1.49045	2.80977	down			FALSE	Homo sapiens FP15331 mRNA, complete cds. [AF461897]			123436226	chr12	123436167	-	hs|12q24.31	AF461897	chr12:123436226-123436167
A_19_P00317904	-2.80517	-1.48809	2.80517	down	uncharacterized LOC401585	FLJ25917	FALSE	Homo sapiens cDNA FLJ25917 fis, clone CBR04926. [AK098783]	401585		45707435	chrX	45707376	-	hs|Xp11.3	TCONS_l2_00030808	chrX:45707435-45707376		Hs.633348
A_33_P3249872	-2.80513	-1.48807	2.80513	down	fibulin 1	FBLN1	FALSE	Homo sapiens fibulin 1 (FBLN1), transcript variant C, mRNA [NM_001996]	2192	GO:0007566|GO:0005509|GO:0005578|GO:0005576|GO:0005615|GO:0005604|GO:0016504|GO:0031012|GO:0010952|GO:0030198|GO:0016032|GO:0005201|GO:0070062	45959232	chr22	45959173	+	hs|22q13.31	NM_001996	chr22:45959173-45959232	NM_001996	Hs.24601
A_24_P198629	-2.79916	-1.48499	2.79916	down	lines homolog (Drosophila)	LINS	FALSE	Homo sapiens lines homolog (Drosophila) (LINS), mRNA [NM_001040616]	55180		101109837	chr15	101109778	-	hs|15q26.3	NM_001040616	chr15:101109837-101109778	NM_001040616	Hs.105633
A_23_P160720	-2.79779	-1.48429	2.79779	down	basic leucine zipper transcription factor, ATF-like 3	BATF3	FALSE	Homo sapiens basic leucine zipper transcription factor, ATF-like 3 (BATF3), mRNA [NM_018664]	55509	GO:0001078|GO:0003700|GO:0006366|GO:0003714|GO:0005634|GO:0043011|GO:0000122|GO:0097028|GO:0009615|GO:0000978	212860087	chr1	212860028	-	hs|1q32.3	NM_018664	chr1:212860087-212860028	NM_018664	Hs.62919
A_23_P5983	-2.79752	-1.48415	2.79752	down	phospholipid transfer protein	PLTP	FALSE	Homo sapiens phospholipid transfer protein (PLTP), transcript variant 1, mRNA [NM_006227]	5360	GO:0006629|GO:0006869|GO:0005576|GO:0030317|GO:0010189|GO:0005615|GO:0008289	44527701	chr20	44527642	-	hs|20q13.12	NM_006227	chr20:44527701-44527642	NM_006227	Hs.439312
A_32_P113812	-2.79692	-1.48384	2.79692	down			FALSE	Q9HBY7_HUMAN (Q9HBY7) Regulatory erythroid kinase long form (Dual-specificity tyrosine-phosphorylation regulated kinase 3 long isoform) (Dual-specificity tyrosine-(Y)-phosphorylation regulated kinase 3), partial (4%) [THC2689950]			206808056	chr1	206807997	-	hs|1q32.1		chr1:206808056-206807997
A_32_P190944	-2.79448	-1.48258	2.79448	down	activin A receptor, type IC	ACVR1C	FALSE	Homo sapiens activin A receptor, type IC (ACVR1C), transcript variant 1, mRNA [NM_145259]	130399	GO:0016361|GO:0023014|GO:0032868|GO:0005886|GO:0030262|GO:0019915|GO:0002021|GO:0005524|GO:0046872|GO:0030154|GO:0009749|GO:0043280|GO:0004702|GO:0019838|GO:0048179|GO:0038092|GO:0005024|GO:0038100|GO:0006468|GO:0046676	158384001	chr2	158383942	-	hs|2q24.1	NM_145259	chr2:158384001-158383942	NM_145259	Hs.562901
A_19_P00316423	-2.78949	-1.48	2.78949	down			FALSE	tf44h11.x1 NCI_CGAP_Brn23 Homo sapiens cDNA clone IMAGE:2099109 3' similar to SW:IBA2_HUMAN Q14657 ITBA2 PROTEIN ;, mRNA sequence [AI421806]			33019659	chr9	33019600	-	hs|9p21.1	AI421806	chr9:33019659-33019600		Hs.733995
A_33_P3843873	-2.78663	-1.47852	2.78663	down	embryonic stem cell related (non-protein coding)	ESRG	FALSE	Homo sapiens embryonic stem cell related (non-protein coding) (ESRG), long non-coding RNA [NR_027122]	790952	GO:0005634	54666226	chr3	54666167	-	hs|3p14.3	NR_027122	chr3:54666226-54666167	NR_027122	Hs.720658
A_23_P7361	-2.78662	-1.47851	2.78662	down	ELOVL fatty acid elongase 6	ELOVL6	FALSE	Homo sapiens ELOVL fatty acid elongase 6 (ELOVL6), transcript variant 1, mRNA [NM_024090]	79071	GO:0005515|GO:0016747|GO:0005783|GO:0042759|GO:0019367|GO:0019432|GO:0005789|GO:0030176|GO:0044281|GO:0035338|GO:0044255	110971230	chr4	110971171	-	hs|4q25	NM_024090	chr4:110971230-110971171	NM_024090	Hs.412939
A_19_P00329396	-2.77832	-1.47421	2.77832	down			FALSE				129849005	chr6	129848946	-	hs|6q22.33		chr6:129849005-129848946
A_32_P183970	-2.77726	-1.47366	2.77726	down	chromosome 15 open reading frame 62	C15orf62	FALSE	Homo sapiens chromosome 15 open reading frame 62 (C15orf62), mRNA [NM_001130448]	643338	GO:0005739	41064345	chr15	41064286	+	hs|15q15.1	NM_001130448	chr15:41064286-41064345	NM_001130448	Hs.631715
A_23_P100539	-2.77557	-1.47278	2.77557	down	ATP-binding cassette, sub-family C (CFTR/MRP), member 6	ABCC6	FALSE	Homo sapiens ATP-binding cassette, sub-family C (CFTR/MRP), member 6 (ABCC6), transcript variant 1, mRNA [NM_001171]	368	GO:0005215|GO:0005886|GO:0006200|GO:0042493|GO:0042626|GO:0005524|GO:0016328|GO:0055085|GO:0016323|GO:0016324|GO:0006810|GO:0016021|GO:0007601	16243914	chr16	16243855	-	hs|16p13.11	NM_001171	chr16:16243914-16243855	NM_001171	Hs.442182
A_33_P3309075	-2.77331	-1.47161	2.77331	down	TBC1 domain family, member 8 (with GRAM domain)	TBC1D8	FALSE	Homo sapiens TBC1 domain family, member 8 (with GRAM domain) (TBC1D8), mRNA [NM_001102426]	11138	GO:0008284|GO:0016020|GO:0008015|GO:0005509|GO:0032851|GO:0005097	101624138	chr2	101624079	-	hs|2q11.2	NM_001102426	chr2:101624138-101624079	NM_001102426	Hs.442657
A_33_P3388564	-2.76172	-1.46556	2.76172	down	cytochrome b5 domain containing 1	CYB5D1	FALSE	Homo sapiens cytochrome b5 domain containing 1 (CYB5D1), mRNA [NM_144607]	124637	GO:0046872|GO:0020037	7761796	chr17	7761737	+	hs|17p13.1	NM_144607	chr17:7761737-7761796	NM_144607	Hs.27475
A_32_P214340	-2.76085	-1.46511	2.76085	down			FALSE	AF179597 connexin 59 {Homo sapiens} (exp=-1; wgp=0; cg=0), partial (10%) [THC2681034]			39341818	chr1	39341759	+	hs|1p34.3		chr1:039341759-039341818
(+)E1A_r60_a20	-2.75919	-1.46425	2.75919	down			pos	Unknown
A_23_P250619	-2.74779	-1.45827	2.74779	down	zinc finger, DHHC-type containing 14	ZDHHC14	FALSE	Homo sapiens zinc finger, DHHC-type containing 14 (ZDHHC14), transcript variant 2, mRNA [NM_153746]	79683	GO:0018345|GO:0005783|GO:0016409|GO:0008270|GO:0016021|GO:0019706	158094528	chr6	158094469	+	hs|6q25.3	NM_153746	chr6:158094469-158094528	NM_153746	Hs.745003
A_33_P3345816	-2.74693	-1.45782	2.74693	down	G protein-coupled estrogen receptor 1	GPER1	FALSE	Homo sapiens G protein-coupled estrogen receptor 1 (GPER1), transcript variant 3, mRNA [NM_001039966]	2852	GO:0005802|GO:0005515|GO:0030054|GO:0045599|GO:0019228|GO:0005622|GO:0032024|GO:0005496|GO:0048786|GO:0045745|GO:0005794|GO:0030335|GO:0031966|GO:0045742|GO:0004930|GO:0014069|GO:0014068|GO:0044327|GO:0043280|GO:0042734|GO:0007049|GO:0007186|GO:0005887|GO:0045087|GO:0005789|GO:0030263|GO:0030264|GO:0032962|GO:0001956|GO:0030424|GO:0048471|GO:0008284|GO:0008285|GO:0005886|GO:0005783|GO:0030819|GO:…	1133337	chr7	1133278	+	hs|7p22.3	NM_001039966	chr7:1133278-1133337	NM_001039966	Hs.20961
A_23_P302550	-2.74631	-1.45749	2.74631	down	regulator of G-protein signaling 18	RGS18	FALSE	Homo sapiens regulator of G-protein signaling 18 (RGS18), mRNA [NM_130782]	64407	GO:0043547|GO:0005737|GO:0007186|GO:0005886|GO:0038032|GO:0005096	192154660	chr1	192154601	+	hs|1q31.2	NM_130782	chr1:192154601-192154660	NM_130782	Hs.440890
A_24_P68311	-2.74605	-1.45736	2.74605	down	spectrin repeat containing, nuclear envelope 2	SYNE2	FALSE	Homo sapiens spectrin repeat containing, nuclear envelope 2 (SYNE2), transcript variant 1, mRNA [NM_015180]	23224	GO:0005515|GO:0030018|GO:0034504|GO:0007097|GO:0031527|GO:0034993|GO:0005634|GO:0090286|GO:0005635|GO:0005739|GO:0005640|GO:0010761|GO:0051642|GO:0005737|GO:0031022|GO:0006998|GO:0045111|GO:0031965|GO:0030335|GO:0016235|GO:0031258|GO:0033017|GO:0003779|GO:0031981|GO:0007163|GO:0016529|GO:0005654|GO:0016021|GO:0005925	64421485	chr14	64416714	+	hs|14q23.2	NM_015180	chr14:64416714-64421485	NM_015180	Hs.745014
A_23_P111132	-2.74533	-1.45698	2.74533	down	heat shock 70kDa protein 1A	HSPA1A	FALSE	Homo sapiens heat shock 70kDa protein 1A (HSPA1A), mRNA [NM_005345]	3303		31785550	chr6	31785491	+	hs|6p21.33	NM_005345	chr6:31785491-31785550	NM_005345	Hs.274402
A_19_P00315750	-2.74483	-1.45672	2.74483	down			FALSE				5588875	chr9	5588816	-	hs|9p24.1		chr9:005588875-005588816
A_24_P152968	-2.74469	-1.45664	2.74469	down	aldo-keto reductase family 1, member C1	AKR1C1	FALSE	Homo sapiens aldo-keto reductase family 1, member C1 (AKR1C1), mRNA [NM_001353]	1645	GO:0031406|GO:0044598|GO:0046683|GO:0032052|GO:0006805|GO:0044597|GO:0007603|GO:0047086|GO:0005829|GO:0030299|GO:0016655|GO:0071395|GO:0042574|GO:0030855|GO:0047115|GO:0051260|GO:0008206|GO:0047042|GO:0070062|GO:0042632|GO:0047718|GO:0007586|GO:0047006|GO:0001523|GO:0004032|GO:0004033|GO:0015721|GO:0042448|GO:0018636|GO:0055114	5005695	chr10	5005636	+	hs|10p15.1	NM_001353	chr10:5005636-5005695	NM_001353	Hs.460260
A_23_P89431	-2.74406	-1.45631	2.74406	down	chemokine (C-C motif) ligand 2	CCL2	FALSE	Homo sapiens chemokine (C-C motif) ligand 2 (CCL2), mRNA [NM_002982]	6347	GO:0009408|GO:0035684|GO:0008360|GO:0019221|GO:0005615|GO:0030968|GO:0043524|GO:0006935|GO:0000165|GO:0071356|GO:0031727|GO:0043025|GO:0009887|GO:0007179|GO:0010332|GO:0031663|GO:0046677|GO:0008009|GO:0070098|GO:0007568|GO:0030593|GO:0033552|GO:0060137|GO:0051384|GO:0071346|GO:0007186|GO:0007187|GO:0050870|GO:0050806|GO:0071347|GO:0043491|GO:0010759|GO:0032570|GO:0048247|GO:0048246|GO:0006987|GO:…	32584109	chr17	32584050	+	hs|17q12	NM_002982	chr17:32584050-32584109	NM_002982	Hs.303649
A_23_P97736	-2.74233	-1.4554	2.74233	down	neurochondrin	NCDN	FALSE	Homo sapiens neurochondrin (NCDN), transcript variant 3, mRNA [NM_014284]	23154	GO:0030424|GO:0048168|GO:0045453|GO:0043025|GO:0005634|GO:0031175|GO:0030425|GO:0005829	36031948	chr1	36031889	+	hs|1p34.3	NM_014284	chr1:36031889-36031948	NM_014284	Hs.121870
A_23_P45536	-2.74161	-1.45502	2.74161	down	MCF.2 cell line derived transforming sequence	MCF2	FALSE	Homo sapiens MCF.2 cell line derived transforming sequence (MCF2), transcript variant 2, mRNA [NM_005369]	4168	GO:0005515|GO:0051056|GO:0048011|GO:0043065|GO:0007264|GO:0097190|GO:0016358|GO:0005829|GO:0016020|GO:0005089|GO:0005856|GO:0032319|GO:0070062	138664211	chrX	138664152	-	hs|Xq27.1	NM_005369	chrX:138664211-138664152	NM_005369	Hs.387262
A_33_P3331588	-2.73881	-1.45355	2.73881	down	ATPase family, AAA domain containing 3B	ATAD3B	FALSE	Homo sapiens ATPase family, AAA domain containing 3B (ATAD3B), mRNA [NM_031921]	83858	GO:0017111|GO:0008152|GO:0005743|GO:0005524	1431566	chr1	1431507	+	hs|1p36.33	NM_031921	chr1:1431507-1431566	NM_031921	Hs.729021
A_33_P3354569	-2.7381	-1.45318	2.7381	down	glycerol-3-phosphate dehydrogenase 2 (mitochondrial)	GPD2	FALSE	Homo sapiens glycerol-3-phosphate dehydrogenase 2 (mitochondrial) (GPD2), transcript variant 1, mRNA [NM_001083112]	2820	GO:0009331|GO:0019563|GO:0005509|GO:0004368|GO:0005743|GO:0006094|GO:0044281|GO:0006072|GO:0052591|GO:0035264|GO:0043010|GO:0044255|GO:0055114	157442914	chr2	157442855	+	hs|2q24.1	NM_001083112	chr2:157442855-157442914	NM_001083112	Hs.512382
A_32_P70315	-2.73576	-1.45194	2.73576	down	TIMP metallopeptidase inhibitor 4	TIMP4	FALSE	Homo sapiens TIMP metallopeptidase inhibitor 4 (TIMP4), mRNA [NM_003256]	7079	GO:0010951|GO:0008150|GO:0042493|GO:0008191|GO:0032496|GO:0043434|GO:0042698|GO:0034097|GO:0007417|GO:0030017|GO:0005615|GO:0046872	12194787	chr3	12194728	-	hs|3p25.2	NM_003256	chr3:12194787-12194728	NM_003256	Hs.591665
A_23_P102391	-2.73562	-1.45187	2.73562	down	solute carrier family 40 (iron-regulated transporter), member 1	SLC40A1	FALSE	Homo sapiens solute carrier family 40 (iron-regulated transporter), member 1 (SLC40A1), mRNA [NM_014585]	30061	GO:0005515|GO:0043066|GO:0005886|GO:0005771|GO:0003158|GO:0060586|GO:0055085|GO:0009653|GO:0008021|GO:0005622|GO:0006879|GO:0016323|GO:0060345|GO:0005737|GO:0005887|GO:0005381|GO:0016021|GO:0002260|GO:0034755	190425809	chr2	190425750	-	hs|2q32.2	NM_014585	chr2:190425809-190425750	NM_014585	Hs.643005
A_24_P322847	-2.73444	-1.45124	2.73444	down	polymerase (RNA) III (DNA directed) polypeptide H (22.9kD)	POLR3H	FALSE	Homo sapiens polymerase (RNA) III (DNA directed) polypeptide H (22.9kD) (POLR3H), transcript variant 3, mRNA [NM_001018050]	171568	GO:0010467|GO:0006386|GO:0005813|GO:0006385|GO:0003899|GO:0005730|GO:0005634|GO:0006384|GO:0003677|GO:0006383|GO:0043231|GO:0005829|GO:0051607|GO:0006139|GO:0001056|GO:0045087|GO:0005666|GO:0032481|GO:0005654	41921926	chr22	41921867	-	hs|22q13.2	NM_001018050	chr22:41921926-41921867	NM_001018050	Hs.712617
A_33_P3295283	-2.73322	-1.4506	2.73322	down	lysophosphatidylcholine acyltransferase 3	LPCAT3	FALSE	Homo sapiens lysophosphatidylcholine acyltransferase 3 (LPCAT3), mRNA [NM_005768]	10162	GO:0036150|GO:0047184|GO:0005789|GO:0044281|GO:0016021|GO:0006644|GO:0036151|GO:0097006|GO:0046474|GO:0036152	7085411	chr12	7085352	-	hs|12p13.31	NM_005768	chr12:7085411-7085352	NM_005768	Hs.655248
A_19_P00316135	-2.73258	-1.45026	2.73258	down	CYP1B1 antisense RNA 1	CYP1B1-AS1	FALSE	Homo sapiens CYP1B1 antisense RNA 1 (CYP1B1-AS1), long non-coding RNA [NR_027252]	285154		38408989	chr2	38408930	+	hs|2p22.2	NR_027252	chr2:38408930-38408989	NR_027252	Hs.353894
A_33_P3323463	-2.73245	-1.45019	2.73245	down			FALSE	heat shock 70kDa protein 8 [Source:HGNC Symbol;Acc:5241] [ENST00000532091]			122929598	chr11	122929539	-	hs|11q24.1		chr11:122929598-122929539
A_33_P3237775	-2.73187	-1.44989	2.73187	down	nuclear receptor subfamily 1, group H, member 3	NR1H3	FALSE	Homo sapiens nuclear receptor subfamily 1, group H, member 3 (NR1H3), transcript variant 1, mRNA [NM_005693]	10062	GO:0005515|GO:0010467|GO:2000189|GO:0000790|GO:2000188|GO:0006367|GO:0044212|GO:0032810|GO:0043031|GO:0003707|GO:0060336|GO:0004879|GO:0044255|GO:0042632|GO:0010745|GO:0003713|GO:0043277|GO:0000122|GO:0032270|GO:0048550|GO:0032570|GO:0032369|GO:0055092|GO:0005654|GO:0008270|GO:0045893|GO:0051006|GO:0034145|GO:0032376|GO:0090341|GO:0090188|GO:0070328|GO:0005634|GO:0010870|GO:0010875|GO:0015485|GO:…	47290280	chr11	47290221	+	hs|11p11.2	NM_005693	chr11:47290221-47290280	NM_005693	Hs.438863
A_23_P139500	-2.73066	-1.44925	2.73066	down	basic helix-loop-helix family, member e41	BHLHE41	FALSE	Homo sapiens basic helix-loop-helix family, member e41 (BHLHE41), mRNA [NM_030762]	79365	GO:0001191|GO:0005515|GO:0001102|GO:0046982|GO:0042826|GO:0006366|GO:0008283|GO:0003705|GO:0003714|GO:0043426|GO:0043425|GO:0070888|GO:0005634|GO:0000122|GO:0010832|GO:0000978|GO:0042803|GO:0032922|GO:0030154|GO:0001078|GO:0010944|GO:0009887|GO:0045892	26273691	chr12	26273632	-	hs|12p12.1	NM_030762	chr12:26273691-26273632	NM_030762	Hs.177841
A_33_P3223592	-2.72432	-1.4459	2.72432	down	apolipoprotein E	APOE	FALSE	Homo sapiens apolipoprotein E (APOE), mRNA [NM_000041]	348	GO:0005515|GO:0008219|GO:0006707|GO:0007603|GO:0002021|GO:0005615|GO:0042803|GO:0042802|GO:0034361|GO:0043524|GO:0034364|GO:0034363|GO:0034362|GO:0043025|GO:0034447|GO:0042632|GO:0032868|GO:0033344|GO:0005794|GO:0016209|GO:0043691|GO:0007568|GO:0031232|GO:0007271|GO:0006898|GO:0034372|GO:0034374|GO:0007186|GO:0034375|GO:0042157|GO:0006641|GO:0015909|GO:0000302|GO:0043537|GO:0042159|GO:0005319|GO:…	45412649	chr19	45412590	+	hs|19q13.32	NM_000041	chr19:45412590-45412649	NM_000041	Hs.654439
A_19_P00323196	-2.72277	-1.44508	2.72277	down	chromosome 5 open reading frame 56	C5orf56	FALSE	Homo sapiens cDNA FLJ26121 fis, clone SYN00535. [AK129632]	441108		131807909	chr5	131807850	+	hs|5q31.1	AK129632	chr5:131807850-131807909		Hs.658288
A_33_P3275510	-2.72154	-1.44442	2.72154	down	chromosome 20 open reading frame 196	C20orf196	FALSE	Homo sapiens chromosome 20 open reading frame 196 (C20orf196), mRNA [NM_152504]	149840		5844557	chr20	5844498	+	hs|20p12.3	NM_152504	chr20:5844498-5844557	NM_152504	Hs.529340
A_23_P77328	-2.72124	-1.44426	2.72124	down	GTP cyclohydrolase I feedback regulator	GCHFR	FALSE	Homo sapiens GTP cyclohydrolase I feedback regulator (GCHFR), mRNA [NM_005258]	2644	GO:0004857|GO:0005515|GO:0042470|GO:0031965|GO:0050999|GO:0005634|GO:0044281|GO:0051291|GO:0030425|GO:0005829|GO:0006809|GO:0043234|GO:0009890|GO:0005737|GO:0030742|GO:0046209|GO:0043105|GO:0016597|GO:0044549|GO:0042133	41059569	chr15	41059510	+	hs|15q15.1	NM_005258	chr15:41059510-41059569	NM_005258	Hs.631717
A_23_P257971	-2.71384	-1.44034	2.71384	down	aldo-keto reductase family 1, member C1	AKR1C1	FALSE	Homo sapiens aldo-keto reductase family 1, member C1 (AKR1C1), mRNA [NM_001353]	1645	GO:0031406|GO:0044598|GO:0046683|GO:0032052|GO:0006805|GO:0044597|GO:0007603|GO:0047086|GO:0005829|GO:0030299|GO:0016655|GO:0071395|GO:0042574|GO:0030855|GO:0047115|GO:0051260|GO:0008206|GO:0047042|GO:0070062|GO:0042632|GO:0047718|GO:0007586|GO:0047006|GO:0001523|GO:0004032|GO:0004033|GO:0015721|GO:0042448|GO:0018636|GO:0055114	5019969	chr10	5019910	+	hs|10p15.1	NM_001353	chr10:5019910-5019969	NM_001353	Hs.460260
A_33_P3250348	-2.71191	-1.43931	2.71191	down	protocadherin 18	PCDH18	FALSE	Homo sapiens protocadherin 18 (PCDH18), mRNA [NM_019035]	54510	GO:0005886|GO:0007420|GO:0005509|GO:0016021|GO:0007156	138440160	chr4	138440101	-	hs|4q28.3	NM_019035	chr4:138440160-138440101	NM_019035	Hs.591691
A_23_P204087	-2.71184	-1.43927	2.71184	down	2'-5'-oligoadenylate synthetase 2, 69/71kDa	OAS2	FALSE	Homo sapiens 2'-5'-oligoadenylate synthetase 2, 69/71kDa (OAS2), transcript variant 1, mRNA [NM_016817]	4939	GO:0003725|GO:0048471|GO:0018377|GO:0005783|GO:0001730|GO:0019221|GO:0005634|GO:0009615|GO:0005524|GO:0046872|GO:0043231|GO:0005829|GO:0006401|GO:0005739|GO:0051607|GO:0005737|GO:0006139|GO:0060337|GO:0016020|GO:0006486|GO:0008270|GO:0060333|GO:0006164	113448660	chr12	113448601	+	hs|12q24.13	NM_016817	chr12:113448601-113448660	NM_016817	Hs.414332
A_23_P215900	-2.71038	-1.43849	2.71038	down	scavenger receptor class A, member 3	SCARA3	FALSE	Homo sapiens scavenger receptor class A, member 3 (SCARA3), transcript variant 1, mRNA [NM_016240]	51435	GO:0009650|GO:0005581|GO:0000139|GO:0005789|GO:0016021|GO:0006979|GO:0006898|GO:0005044	27530442	chr8	27530383	+	hs|8p21.1	NM_016240	chr8:27530383-27530442	NM_016240	Hs.128856
A_23_P164228	-2.70771	-1.43708	2.70771	down	ATP synthase, H+ transporting, mitochondrial Fo complex, subunit C1 (subunit 9)	ATP5G1	FALSE	Homo sapiens ATP synthase, H+ transporting, mitochondrial Fo complex, subunit C1 (subunit 9) (ATP5G1), transcript variant 1, mRNA [NM_005175]	516	GO:0005215|GO:0015078|GO:0005743|GO:0044281|GO:0005753|GO:0008289|GO:0005739|GO:0022904|GO:0042776|GO:0015991|GO:0016021|GO:0044237|GO:0045263	46971772	chr17	46970798	+	hs|17q21.32	NM_005175	chr17:46970798-46971772	NM_005175	Hs.80986
A_33_P3268472	-2.70688	-1.43663	2.70688	down	cathepsin C	CTSC	FALSE	Homo sapiens cathepsin C (CTSC), transcript variant 3, mRNA [NM_001114173]	1075	GO:0005515|GO:0031404|GO:0005794|GO:0010033|GO:0004252|GO:0019902|GO:0005783|GO:2001235|GO:0007568|GO:0051087|GO:0006915|GO:0043621|GO:0005615|GO:0005764|GO:0042802|GO:0016505|GO:0006955|GO:0001913|GO:0006508|GO:0008234|GO:0070062	88061340	chr11	88061281	-	hs|11q14.2	NM_001114173	chr11:88061340-88061281	NM_001114173	Hs.128065
A_33_P3409655	-2.70496	-1.43561	2.70496	down			FALSE				151375557	chr3	151375498	+	hs|3q25.1		chr3:151375498-151375557
A_32_P505133	-2.70391	-1.43505	2.70391	down	chromosome 19 open reading frame 47	C19orf47	FALSE	Homo sapiens chromosome 19 open reading frame 47 (C19orf47), transcript variant 1, mRNA [NM_001256440]	126526	GO:0005730|GO:0005634	40828060	chr19	40828001	-	hs|19q13.2	NM_001256440	chr19:40828060-40828001	NM_001256440	Hs.631557
A_23_P214897	-2.70347	-1.43481	2.70347	down	A kinase (PRKA) anchor protein 12	AKAP12	FALSE	Homo sapiens A kinase (PRKA) anchor protein 12 (AKAP12), transcript variant 2, mRNA [NM_144497]	9590	GO:0005515|GO:0005737|GO:0007186|GO:0090036|GO:0008179|GO:0030819|GO:0006605|GO:0051018|GO:0005856|GO:0010739|GO:0005938	151670065	chr6	151670006	+	hs|6q25.1	NM_144497	chr6:151670006-151670065	NM_144497	Hs.371240
A_23_P129221	-2.70217	-1.43412	2.70217	down	fumarylacetoacetate hydrolase (fumarylacetoacetase)	FAH	FALSE	Homo sapiens fumarylacetoacetate hydrolase (fumarylacetoacetase) (FAH), mRNA [NM_000137]	2184	GO:0004334|GO:0034641|GO:0006559|GO:0044281|GO:0006572|GO:0006527|GO:0046872|GO:0070062|GO:0005829	80469880	chr15	80467376	+	hs|15q25.1	NM_000137	chr15:80467376-80469880	NM_000137	Hs.73875
A_33_P3349469	-2.69945	-1.43267	2.69945	down	ATPase family, AAA domain containing 3A	ATAD3A	FALSE	Homo sapiens ATPase family, AAA domain containing 3A (ATAD3A), transcript variant 1, mRNA [NM_018188]	55210	GO:0042645|GO:0005739|GO:0043066|GO:0017111|GO:0008152|GO:0005743|GO:0016049|GO:0016021|GO:0005524	1470050	chr1	1469991	+	hs|1p36.33	NM_018188	chr1:1469991-1470050	NM_018188	Hs.23413
A_23_P341223	-2.69932	-1.43259	2.69932	down	kelch-like family member 21	KLHL21	FALSE	Homo sapiens kelch-like family member 21 (KLHL21), mRNA [NM_014851]	9903	GO:0005827|GO:0007067|GO:0005737|GO:0004842|GO:0032465|GO:0016567|GO:0035853|GO:0031463	6650895	chr1	6650836	-	hs|1p36.31	NM_014851	chr1:6650895-6650836	NM_014851	Hs.7764
A_19_P00318769	-2.69257	-1.42899	2.69257	down	RFX family member 8, lacking RFX DNA binding domain	RFX8	FALSE	Homo sapiens RFX family member 8, lacking RFX DNA binding domain (RFX8), mRNA [NM_001145664]	731220	GO:0006355|GO:0005634|GO:0003677|GO:0006351	102034125	chr2	102034066	-	hs|2q11.2	NM_001145664	chr2:102034125-102034066	NM_001145664	Hs.662488
A_19_P00806502	-2.69047	-1.42786	2.69047	down			FALSE	ALU7_HUMAN (P39194) Alu subfamily SQ sequence contamination warning entry, partial (13%) [THC2564499]			82169189	chr16	82169130	-	hs|16q23.3		chr16:082169189-082169130
A_33_P3339253	-2.6869	-1.42594	2.6869	down			FALSE	tf44h11.x1 NCI_CGAP_Brn23 Homo sapiens cDNA clone IMAGE:2099109 3' similar to SW:IBA2_HUMAN Q14657 ITBA2 PROTEIN ;, mRNA sequence [AI421806]			33019659	chr9	33019600	-	hs|9p21.1	AI421806	chr9:33019659-33019600		Hs.733995
A_23_P258190	-2.68593	-1.42542	2.68593	down	aldo-keto reductase family 1, member B1 (aldose reductase)	AKR1B1	FALSE	Homo sapiens aldo-keto reductase family 1, member B1 (aldose reductase) (AKR1B1), mRNA [NM_001628]	231	GO:0044598|GO:0044597|GO:0005975|GO:0043795|GO:0005730|GO:0006950|GO:0009055|GO:0005634|GO:0044281|GO:0005615|GO:0005829|GO:0004032|GO:0004033|GO:0005737|GO:0006700|GO:0008202|GO:0070062|GO:0055114	134132097	chr7	134130061	-	hs|7q33	NM_001628	chr7:134132097-134130061	NM_001628	Hs.521212
A_33_P3406702	-2.68586	-1.42538	2.68586	down			FALSE				104908242	chr12	104908183	+	hs|12q23.3		chr12:104908183-104908242
A_33_P3252781	-2.68474	-1.42479	2.68474	down	placenta-specific 9	PLAC9	FALSE	Homo sapiens placenta-specific 9 (PLAC9), mRNA [NM_001012973]	219348	GO:0005576	81901934	chr10	81901875	+	hs|10q22.3	NM_001012973	chr10:81901875-81901934	NM_001012973	Hs.204947
A_32_P831181	-2.68416	-1.42447	2.68416	down	BRI3 binding protein	BRI3BP	FALSE	Homo sapiens BRI3 binding protein (BRI3BP), mRNA [NM_080626]	140707	GO:0005739|GO:0005741|GO:0016021	125497181	chr12	125497122	+	hs|12q24.31	NM_080626	chr12:125497122-125497181	NM_080626	Hs.596464
A_23_P423331	-2.68036	-1.42242	2.68036	down	netrin G2	NTNG2	FALSE	Homo sapiens netrin G2 (NTNG2), mRNA [NM_032536]	84628	GO:0005515|GO:0003674|GO:0007409|GO:0046658	135118165	chr9	135118106	+	hs|9q34.13	NM_032536	chr9:135118106-135118165	NM_032536	Hs.163642
A_23_P68155	-2.67916	-1.42178	2.67916	down	interferon induced with helicase C domain 1	IFIH1	FALSE	Homo sapiens interferon induced with helicase C domain 1 (IFIH1), mRNA [NM_022168]	64135	GO:0003725|GO:0005515|GO:0032728|GO:0003727|GO:0034344|GO:0032727|GO:0016925|GO:0004386|GO:0042981|GO:0005634|GO:0009615|GO:0003677|GO:0005524|GO:0005829|GO:0045087|GO:0039528|GO:0043021|GO:0009597|GO:0016032|GO:0008270|GO:0032480	163128865	chr2	163128806	-	hs|2q24.2	NM_022168	chr2:163128865-163128806	NM_022168	Hs.163173
DCP_20_1	-2.67552	-1.41982	2.67552	down			pos	Unknown
A_23_P125423	-2.6755	-1.41981	2.6755	down	complement component 1, r subcomponent	C1R	FALSE	Homo sapiens complement component 1, r subcomponent (C1R), mRNA [NM_001733]	715	GO:0005515|GO:0006956|GO:0006955|GO:0004252|GO:0045087|GO:0006958|GO:0005509|GO:0006508|GO:0008236|GO:0072562|GO:0005576	7187626	chr12	7187567	-	hs|12p13.31	NM_001733	chr12:7187626-7187567	NM_001733	Hs.524224
A_23_P145631	-2.66861	-1.41609	2.66861	down	GTPase, IMAP family member 6	GIMAP6	FALSE	Homo sapiens GTPase, IMAP family member 6 (GIMAP6), transcript variant 1, mRNA [NM_024711]	474344	GO:0005525|GO:0005829	150323214	chr7	150323155	-	hs|7q36.1	NM_024711	chr7:150323214-150323155	NM_024711	Hs.647105
A_33_P3210203	-2.66785	-1.41568	2.66785	down	spire-type actin nucleation factor 2	SPIRE2	FALSE	Homo sapiens spire-type actin nucleation factor 2 (SPIRE2), mRNA [NM_032451]	84501	GO:0048471|GO:0030036|GO:0005886|GO:0070649|GO:0003779|GO:0046907|GO:0015031|GO:0032154|GO:0005829|GO:0036089|GO:0051295|GO:0040038|GO:0005856|GO:0016192|GO:0005938|GO:0030659	89937727	chr16	89937668	+	hs|16q24.3	NM_032451	chr16:89937668-89937727	NM_032451	Hs.461786
A_23_P113748	-2.66729	-1.41538	2.66729	down	zinc finger protein 385D	ZNF385D	FALSE	Homo sapiens zinc finger protein 385D (ZNF385D), mRNA [NM_024697]	79750	GO:0008270|GO:0005634|GO:0003676	21478580	chr3	21478521	-	hs|3p24.3	NM_024697	chr3:21478580-21478521	NM_024697	Hs.21026
A_23_P39116	-2.66657	-1.41499	2.66657	down	ligase I, DNA, ATP-dependent	LIG1	FALSE	Homo sapiens ligase I, DNA, ATP-dependent (LIG1), transcript variant 1, mRNA [NM_000234]	3978	GO:0042542|GO:0003909|GO:0005634|GO:0006303|GO:0009653|GO:0046872|GO:0043231|GO:0006302|GO:0005739|GO:0006273|GO:0006271|GO:0000723|GO:0000724|GO:0000722|GO:0006297|GO:0033151|GO:0005794|GO:0005694|GO:0005730|GO:0003910|GO:0006259|GO:0005524|GO:0003677|GO:0006281|GO:0051103|GO:0006283|GO:0006284|GO:0005654|GO:0006289|GO:0000278|GO:0032201|GO:0051301	48618881	chr19	48618822	-	hs|19q13.33	NM_000234	chr19:48618881-48618822	NM_000234	Hs.1770
A_23_P146922	-2.66565	-1.41449	2.66565	down	growth arrest-specific 6	GAS6	FALSE	Homo sapiens growth arrest-specific 6 (GAS6), transcript variant 1, mRNA [NM_000820]	2621	GO:0006909|GO:0005515|GO:0032715|GO:0005615|GO:0030296|GO:0018105|GO:0045860|GO:0006508|GO:0033159|GO:0032689|GO:0048018|GO:0043027|GO:0005796|GO:0005509|GO:0019064|GO:0031589|GO:0043277|GO:0030168|GO:0032720|GO:0032825|GO:0010804|GO:0010934|GO:0043491|GO:0035754|GO:0001786|GO:0005788|GO:0045892|GO:0044267|GO:0040008|GO:0043687|GO:0032008|GO:0008283|GO:0035457|GO:0031100|GO:0048146|GO:0046718|GO:…	114531609	chr13	114531550	-	hs|13q34	NM_000820	chr13:114531609-114531550	NM_000820	Hs.646346
A_33_P3385477	-2.6653	-1.4143	2.6653	down	ATPase family, AAA domain containing 3B	ATAD3B	FALSE	Homo sapiens ATPase family, AAA domain containing 3B (ATAD3B), mRNA [NM_031921]	83858	GO:0017111|GO:0008152|GO:0005743|GO:0005524	1431581	chr1	1431522	+	hs|1p36.33	NM_031921	chr1:1431522-1431581	NM_031921	Hs.729021
A_32_P119248	-2.66521	-1.41425	2.66521	down	forkhead box D4	FOXD4	FALSE	Homo sapiens forkhead box D4 (FOXD4), mRNA [NM_207305]	2298	GO:0005667|GO:0007389|GO:0001658|GO:0003700|GO:0006366|GO:0051216|GO:0008301|GO:0001822|GO:0003705|GO:0001755|GO:0030318|GO:0005634|GO:0000122|GO:0048846|GO:0048485|GO:0048484|GO:0043565|GO:0051090|GO:0003690|GO:0045944|GO:0050935|GO:0007422|GO:0048937|GO:0008134	116549	chr9	116490	-	hs|9p24.3	NM_207305	chr9:116549-116490	NM_207305	Hs.584759
A_19_P00326696	-2.66326	-1.41319	2.66326	down			FALSE				72073407	chr6	72073348	-	hs|6q13		chr6:072073407-072073348
A_33_P3289005	-2.66309	-1.4131	2.66309	down	adaptor-related protein complex 1, sigma 3 subunit	AP1S3	FALSE	Homo sapiens adaptor-related protein complex 1, sigma 3 subunit (AP1S3), transcript variant 1, mRNA [NM_001039569]	130340	GO:0006892|GO:0005765|GO:0006886|GO:0032588|GO:0030117|GO:0005829|GO:0050690|GO:0019886|GO:0005905|GO:0000139|GO:0008565|GO:0061024|GO:0016032|GO:0030659	224629990	chr2	224629931	-	hs|2q36.1	NM_001039569	chr2:224629990-224629931	NM_001039569	Hs.632555
A_33_P3352340	-2.66009	-1.41147	2.66009	down	keratin associated protein 9-1	KRTAP9-1	FALSE	Homo sapiens keratin associated protein 9-1 (KRTAP9-1), mRNA [NM_001190460]	728318	GO:0045095	39346891	chr17	39346832	+	hs|17q21.2	NM_001190460	chr17:39346832-39346891	NM_001190460	Hs.727478
A_23_P139575	-2.65849	-1.41061	2.65849	down	proline rich 13	PRR13	FALSE	Homo sapiens proline rich 13 (PRR13), transcript variant 3, mRNA [NM_001005354]	54458	GO:0006355|GO:0005634|GO:0006351	53840400	chr12	53840341	+	hs|12q13.13	NM_001005354	chr12:53840341-53840400	NM_001005354	Hs.744894
A_33_P3345812	-2.65061	-1.40632	2.65061	down	G protein-coupled estrogen receptor 1	GPER1	FALSE	Homo sapiens G protein-coupled estrogen receptor 1 (GPER1), transcript variant 3, mRNA [NM_001039966]	2852	GO:0005802|GO:0005515|GO:0030054|GO:0045599|GO:0019228|GO:0005622|GO:0032024|GO:0005496|GO:0048786|GO:0045745|GO:0005794|GO:0030335|GO:0031966|GO:0045742|GO:0004930|GO:0014069|GO:0014068|GO:0044327|GO:0043280|GO:0042734|GO:0007049|GO:0007186|GO:0005887|GO:0045087|GO:0005789|GO:0030263|GO:0030264|GO:0032962|GO:0001956|GO:0030424|GO:0048471|GO:0008284|GO:0008285|GO:0005886|GO:0005783|GO:0030819|GO:…	1132720	chr7	1132661	+	hs|7p22.3	NM_001039966	chr7:1132661-1132720	NM_001039966	Hs.20961
A_24_P896205	-2.64803	-1.40492	2.64803	down			FALSE	HSA312319 OVARIAN/Breast septin gamma {Homo sapiens} (exp=-1; wgp=0; cg=0), partial (21%) [THC2583659]			59470878	chr17	59470819	-	hs|17q23.2	TCONS_00025721	chr17:59470878-59470819
A_23_P43095	-2.64747	-1.40461	2.64747	down	zinc finger homeobox 4	ZFHX4	FALSE	Homo sapiens zinc finger homeobox 4 (ZFHX4), mRNA [NM_024721]	79776	GO:0043565|GO:0006355|GO:0003700|GO:0008270|GO:0005634|GO:0006351	77776756	chr8	77776697	+	hs|8q21.11	NM_024721	chr8:77776697-77776756	NM_024721	Hs.458973
A_23_P26024	-2.64662	-1.40415	2.64662	down	chromosome 15 open reading frame 48	C15orf48	FALSE	Homo sapiens chromosome 15 open reading frame 48 (C15orf48), transcript variant 2, mRNA [NM_032413]	84419	GO:0005739|GO:0005634	45725354	chr15	45725295	+	hs|15q21.1	NM_032413	chr15:45725295-45725354	NM_032413	Hs.112242
A_23_P110212	-2.64526	-1.40341	2.64526	down	acyl-CoA synthetase long-chain family member 1	ACSL1	FALSE	Homo sapiens acyl-CoA synthetase long-chain family member 1 (ACSL1), transcript variant 1, mRNA [NM_001995]	2180	GO:0014070|GO:0001676|GO:0005886|GO:0071902|GO:0033211|GO:0005741|GO:0035338|GO:0044281|GO:0005739|GO:0019432|GO:0044539|GO:0005778|GO:0044255|GO:0008610|GO:0007584|GO:0042178|GO:0042493|GO:0034201|GO:0036109|GO:0005524|GO:0004467|GO:0033559|GO:0043651|GO:0005789|GO:0016021	185676745	chr4	185676732	-	hs|4q35.1	NM_001995	chr4:185676745-185676732	NM_001995	Hs.406678
A_33_P3386765	-2.64317	-1.40227	2.64317	down	abhydrolase domain containing 14A	ABHD14A	FALSE	Homo sapiens abhydrolase domain containing 14A (ABHD14A), mRNA [NM_015407]	25864	GO:0005737|GO:0016787|GO:0008152|GO:0016021|GO:0070062	52015210	chr3	52015151	+	hs|3p21.2	NM_015407	chr3:52015151-52015210	NM_015407	Hs.534400
A_23_P200670	-2.64234	-1.40181	2.64234	down	WD repeat domain 78	WDR78	FALSE	Homo sapiens WD repeat domain 78 (WDR78), transcript variant 2, mRNA [NM_207014]	79819		67303277	chr1	67303266	-	hs|1p31.3	NM_207014	chr1:67303277-67303266	NM_207014	Hs.49421
A_33_P3344264	-2.63602	-1.39836	2.63602	down	dihydrouridine synthase 3-like (S. cerevisiae)	DUS3L	FALSE	Homo sapiens dihydrouridine synthase 3-like (S. cerevisiae) (DUS3L), transcript variant 1, mRNA [NM_020175]	56931	GO:0050660|GO:0017150|GO:0046872|GO:0055114	5785214	chr19	5785155	-	hs|19p13.3	NM_020175	chr19:5785214-5785155	NM_020175	Hs.284297
A_23_P164826	-2.62778	-1.39385	2.62778	down	ribonuclease H2, subunit A	RNASEH2A	FALSE	Homo sapiens ribonuclease H2, subunit A (RNASEH2A), mRNA [NM_006397]	10535	GO:0032299|GO:0006260|GO:0004523|GO:0003723|GO:0005634|GO:0004540|GO:0006298|GO:0046872|GO:0006401	12924335	chr19	12924276	+	hs|19p13.2	NM_006397	chr19:12924276-12924335	NM_006397	Hs.532851
A_33_P3540725	-2.62695	-1.39339	2.62695	down	uncharacterized LOC401585	FLJ25917	FALSE	Homo sapiens cDNA FLJ25917 fis, clone CBR04926. [AK098783]	401585		45707436	chrX	45707377	-	hs|Xp11.3	AK098783	chrX:45707436-45707377		Hs.633348
A_23_P167509	-2.62262	-1.39101	2.62262	down	cytoplasmic FMR1 interacting protein 2	CYFIP2	FALSE	Homo sapiens cytoplasmic FMR1 interacting protein 2 (CYFIP2), transcript variant 3, mRNA [NM_014376]	26999	GO:0005515|GO:0043005|GO:0048471|GO:0030054|GO:0006915|GO:0045202|GO:0097202|GO:0045862|GO:0005829|GO:0005737|GO:0016337|GO:0045087|GO:0038096|GO:0070062	156822194	chr5	156822135	+	hs|5q33.3	NM_014376	chr5:156822135-156822194	NM_014376	Hs.519702
A_33_P3226600	-2.62224	-1.3908	2.62224	down	glycosylphosphatidylinositol anchor attachment 1	GPAA1	FALSE	Homo sapiens glycosylphosphatidylinositol anchor attachment 1 (GPAA1), mRNA [NM_003801]	8733	GO:0006501|GO:0005515|GO:0034235|GO:0006461|GO:0015631|GO:0016255|GO:0005789|GO:0042765|GO:0006621|GO:0003923|GO:0044267|GO:0043687	145141118	chr8	145141059	+	hs|8q24.3	NM_003801	chr8:145141059-145141118	NM_003801	Hs.627962
A_19_P00319811	-2.61668	-1.38774	2.61668	down			FALSE	Homo sapiens mRNA; cDNA DKFZp586O1318 (from clone DKFZp586O1318) [AL049390]			134965091	chr2	134965032	+	hs|2q21.2	AL049390	chr2:134965032-134965091		Hs.22689
A_32_P169179	-2.61574	-1.38722	2.61574	down	msh homeobox 2 pseudogene 1	MSX2P1	FALSE	Homo sapiens msh homeobox 2 pseudogene 1 (MSX2P1), non-coding RNA [NR_002307]	55545		56235370	chr17	56235311	+	hs|17q22	NR_002307	chr17:56235311-56235370	NR_002307	Hs.381329
A_33_P3238415	-2.61496	-1.38679	2.61496	down	germ cell associated 1	GSG1	FALSE	Homo sapiens germ cell associated 1 (GSG1), transcript variant 3, mRNA [NM_001080554]	83445	GO:0005789|GO:0016021|GO:0070063	13237895	chr12	13237836	-	hs|12p13.1	NM_001080554	chr12:13237895-13237836	NM_001080554	Hs.240053
A_32_P187704	-2.61175	-1.38502	2.61175	down	syntrophin, gamma 1	SNTG1	FALSE	syntrophin, gamma 1 [Source:HGNC Symbol;Acc:13740] [ENST00000521574]	54212	GO:0005737|GO:0007154|GO:0016013|GO:0032587|GO:0005634|GO:0003779|GO:0008022|GO:0005856	50824070	chr8	50824011	+	hs|8q11.21	XM_006716494	chr8:50824011-50824070	XM_006716494
A_23_P54144	-2.61047	-1.38431	2.61047	down	bone morphogenetic protein 4	BMP4	FALSE	Homo sapiens bone morphogenetic protein 4 (BMP4), transcript variant 1, mRNA [NM_001202]	652	GO:0033088|GO:0005515|GO:0001657|GO:0034504|GO:0001658|GO:0033085|GO:0003139|GO:0009791|GO:0005615|GO:0007281|GO:0007224|GO:0035990|GO:0002062|GO:0030198|GO:0035993|GO:0010942|GO:0003279|GO:0002320|GO:0030501|GO:0010453|GO:0001843|GO:0003323|GO:0030509|GO:0000122|GO:0021978|GO:0042056|GO:0005125|GO:0001649|GO:0003130|GO:0007182|GO:0010595|GO:0001958|GO:0032967|GO:0008083|GO:0008285|GO:0021983|GO:…	54417377	chr14	54417318	-	hs|14q22.2	NM_001202	chr14:54417377-54417318	NM_001202	Hs.68879
A_23_P334883	-2.60766	-1.38276	2.60766	down	SH3 and multiple ankyrin repeat domains 2	SHANK2	FALSE	Homo sapiens SH3 and multiple ankyrin repeat domains 2 (SHANK2), transcript variant 1, mRNA [NM_012309]	22941	GO:0005515|GO:0043005|GO:0017124|GO:0060170|GO:0030054|GO:0008328|GO:0005886|GO:0005883|GO:0060291|GO:0060292|GO:0031526|GO:0030426|GO:0016324|GO:0030160|GO:0043197|GO:0045211|GO:0043025|GO:0030534|GO:0007612|GO:0014069|GO:0005575|GO:0071625|GO:0007416|GO:0001917|GO:0035255|GO:0035176|GO:0001750	70314422	chr11	70314363	-	hs|11q13.3	NM_012309	chr11:70314422-70314363	NM_012309	Hs.268726
A_23_P40805	-2.60375	-1.38059	2.60375	down	Kruppel-like factor 15	KLF15	FALSE	Homo sapiens Kruppel-like factor 15 (KLF15), mRNA [NM_014079]	28999	GO:0005515|GO:0072112|GO:0001077|GO:2000757|GO:0044212|GO:0015758|GO:0045944|GO:0010001|GO:0005634|GO:0046872|GO:0006351	126062515	chr3	126062456	-	hs|3q21.3	NM_014079	chr3:126062515-126062456	NM_014079	Hs.272215
A_23_P15603	-2.60182	-1.37952	2.60182	down	mitochondrial rRNA methyltransferase 1 homolog (S. cerevisiae)	MRM1	FALSE	Homo sapiens mitochondrial rRNA methyltransferase 1 homolog (S. cerevisiae) (MRM1), mRNA [NM_024864]	79922	GO:0005739|GO:0006396|GO:0001510|GO:0008173	34965228	chr17	34965169	+	hs|17q12	NM_024864	chr17:34965169-34965228	NM_024864	Hs.194864
A_33_P3423570	-2.60154	-1.37937	2.60154	down	meteorin, glial cell differentiation regulator	METRN	FALSE	Homo sapiens meteorin, glial cell differentiation regulator (METRN), mRNA [NM_024042]	79006	GO:0010001|GO:0050772|GO:0005615	767478	chr16	767419	+	hs|16p13.3	NM_024042	chr16:767419-767478	NM_024042	Hs.533772
A_23_P213959	-2.59961	-1.3783	2.59961	down	peroxisome proliferator-activated receptor gamma, coactivator 1 beta	PPARGC1B	FALSE	Homo sapiens peroxisome proliferator-activated receptor gamma, coactivator 1 beta (PPARGC1B), transcript variant 1, mRNA [NM_133263]	133522	GO:0006366|GO:0003723|GO:0050682|GO:0005634|GO:0044281|GO:2000273|GO:0051591|GO:0005739|GO:0030374|GO:0000166|GO:0045780|GO:0045944|GO:0007015|GO:0044255|GO:0006355|GO:0001104|GO:0030331|GO:0045672|GO:0051384|GO:0006390|GO:0060346|GO:0001503|GO:0016592|GO:0010694|GO:0030546|GO:0034614|GO:0005654|GO:0045892|GO:0030520|GO:0042327	149225368	chr5	149221927	+	hs|5q32	NM_133263	chr5:149221927-149225368	NM_133263	Hs.483816
A_23_P92543	-2.59837	-1.37761	2.59837	down	sec1 family domain containing 2	SCFD2	FALSE	Homo sapiens sec1 family domain containing 2 (SCFD2), mRNA [NM_152540]	152579	GO:0008150|GO:0003674|GO:0005575|GO:0015031|GO:0006904	53740227	chr4	53740168	-	hs|4q12	NM_152540	chr4:53740227-53740168	NM_152540	Hs.302287
A_23_P103617	-2.59404	-1.3752	2.59404	down	annexin A9	ANXA9	FALSE	Homo sapiens annexin A9 (ANXA9), mRNA [NM_003568]	8416	GO:0005544|GO:0005515|GO:0016337|GO:0005543|GO:0009986|GO:0015464|GO:0005509|GO:0001786|GO:0007268|GO:0042803|GO:0070062|GO:0005829	150968002	chr1	150967943	+	hs|1q21.3	NM_003568	chr1:150967943-150968002	NM_003568	Hs.3346
A_24_P382630	-2.59245	-1.37432	2.59245	down	mitochondrial ribosome-associated GTPase 2	MTG2	FALSE	Homo sapiens mitochondrial ribosome-associated GTPase 2 (MTG2), mRNA [NM_015666]	26164	GO:0006184|GO:0000287|GO:0070129|GO:0042254|GO:0005759|GO:0005761|GO:0005743|GO:0003924|GO:0044065|GO:0005525	60777372	chr20	60777313	+	hs|20q13.33	NM_015666	chr20:60777313-60777372	NM_015666	Hs.340636
A_23_P161563	-2.59168	-1.37388	2.59168	down	RAB38, member RAS oncogene family	RAB38	FALSE	Homo sapiens RAB38, member RAS oncogene family (RAB38), mRNA [NM_022337]	23682	GO:0035650|GO:0005515|GO:0042470|GO:0035651|GO:0005886|GO:0007264|GO:0035612|GO:0032438|GO:0003924|GO:0072657|GO:0005525|GO:0015031|GO:0032403|GO:0005829|GO:0045335|GO:0006184|GO:0030742|GO:0031905|GO:0016020|GO:0035646|GO:0030670|GO:0060155|GO:0090383|GO:0005769	87883009	chr11	87882950	-	hs|11q14.2	NM_022337	chr11:87883009-87882950	NM_022337	Hs.591975
A_33_P3320804	-2.58763	-1.37163	2.58763	down	inositol hexakisphosphate kinase 1	IP6K1	FALSE	Homo sapiens inositol hexakisphosphate kinase 1 (IP6K1), transcript variant 3, mRNA [NM_001242829]	9807	GO:0046854|GO:0008440|GO:0043647|GO:0005730|GO:0052724|GO:0052723|GO:0005654|GO:0005634|GO:0044281|GO:0005524|GO:0000832|GO:0005829	49761787	chr3	49761728	-	hs|3p21.31	NM_001242829	chr3:49761787-49761728	NM_001242829	Hs.386168
A_23_P303181	-2.58558	-1.37049	2.58558	down	sphingosine kinase 2	SPHK2	FALSE	Homo sapiens sphingosine kinase 2 (SPHK2), transcript variant 1, mRNA [NM_020126]	56848	GO:0005515|GO:0006665|GO:0043066|GO:0008284|GO:0001568|GO:0008283|GO:0030148|GO:0006670|GO:0044281|GO:0005765|GO:0005524|GO:0008481|GO:0007205|GO:0005829|GO:0017050|GO:0003951|GO:0016020|GO:0007420|GO:0004143|GO:0046834|GO:0017016|GO:0006669	49133637	chr19	49133578	+	hs|19q13.33	NM_020126	chr19:49133578-49133637	NM_020126	Hs.528006
DCP_20_0	-2.57817	-1.36635	2.57817	down			pos	Unknown
A_23_P58819	-2.57789	-1.36619	2.57789	down	RAN binding protein 17	RANBP17	FALSE	Homo sapiens RAN binding protein 17 (RANBP17), mRNA [NM_022897]	64901	GO:0005737|GO:0005643|GO:0008536|GO:0051028|GO:0006606|GO:0005525	170725975	chr5	170725916	+	hs|5q35.1	NM_022897	chr5:170725916-170725975	NM_022897	Hs.410810
A_33_P3369716	-2.57766	-1.36606	2.57766	down	uncharacterized LOC100507195	LOC100507195	FALSE	Homo sapiens uncharacterized LOC100507195 (LOC100507195), long non-coding RNA [NR_120458]	100507195		68825700	chr12	68825641	-	hs|12q15	NR_120458	chr12:68825700-68825641	NR_120458
A_32_P151544	-2.57703	-1.36571	2.57703	down	keratin 18	KRT18	FALSE	Homo sapiens keratin 18 (KRT18), transcript variant 1, mRNA [NM_000224]	3875	GO:0005515|GO:0005882|GO:0048471|GO:0043066|GO:0005815|GO:0045104|GO:0034451|GO:0097284|GO:0005730|GO:0097191|GO:0009653|GO:0033209|GO:0005737|GO:0007049|GO:0005198|GO:0097110|GO:0016032|GO:0045095|GO:0043000|GO:0070062	53346554	chr12	53346116	+	hs|12q13.13	NM_000224	chr12:53346116-53346554	NM_000224	Hs.406013
A_19_P00322880	-2.57679	-1.36557	2.57679	down			FALSE	Homo sapiens cDNA FLJ10136 fis, clone HEMBA1003129. [AK000998]			32517350	chr3	32517291	+	hs|3p22.3	AK000998	chr3:32517291-32517350		Hs.675447
A_23_P320261	-2.57399	-1.36401	2.57399	down	dermokine	DMKN	FALSE	Homo sapiens dermokine (DMKN), transcript variant 1, mRNA [NM_001035516]	93099	GO:0005515|GO:0005615|GO:0070062	35988194	chr19	35988135	-	hs|19q13.12	NM_001035516	chr19:35988194-35988135	NM_001035516	Hs.417795
A_24_P321626	-2.5716	-1.36266	2.5716	down	polymerase (RNA) III (DNA directed) polypeptide B	POLR3B	FALSE	Homo sapiens polymerase (RNA) III (DNA directed) polypeptide B (POLR3B), transcript variant 1, mRNA [NM_018082]	55703	GO:0010467|GO:0032728|GO:0006386|GO:0006385|GO:0032549|GO:0003677|GO:0006383|GO:0046872|GO:0005829|GO:0051607|GO:0045089|GO:0001056|GO:0045087|GO:0005666|GO:0005654|GO:0032481	106897957	chr12	106897898	+	hs|12q23.3	NM_018082	chr12:106897898-106897957	NM_018082	Hs.62696
A_23_P135239	-2.5692	-1.36132	2.5692	down	transducin-like enhancer of split 1 (E(sp1) homolog, Drosophila)	TLE1	FALSE	Homo sapiens transducin-like enhancer of split 1 (E(sp1) homolog, Drosophila) (TLE1), mRNA [NM_005077]	7088	GO:0005515|GO:0005667|GO:0001106|GO:0030178|GO:0005730|GO:0007275|GO:0005634|GO:0000122|GO:2000811|GO:0006351|GO:0005829|GO:0010628|GO:0007165|GO:0005737|GO:0007219|GO:0003682|GO:0009887|GO:0005654|GO:0016055|GO:0045892|GO:0043124|GO:0008134	84199177	chr9	84199118	-	hs|9q21.32	NM_005077	chr9:84199177-84199118	NM_005077	Hs.197320
A_23_P74981	-2.56868	-1.36103	2.56868	down	zinc finger protein 670	ZNF670	FALSE	Homo sapiens zinc finger protein 670 (ZNF670), transcript variant 1, mRNA [NM_033213]	93474	GO:0005515|GO:0006355|GO:0005634|GO:0003677|GO:0046872|GO:0006351	247200908	chr1	247200849	-	hs|1q44	NM_033213	chr1:247200908-247200849	NM_033213	Hs.732305
A_23_P8640	-2.56764	-1.36044	2.56764	down	G protein-coupled estrogen receptor 1	GPER1	FALSE	Homo sapiens G protein-coupled estrogen receptor 1 (GPER1), transcript variant 3, mRNA [NM_001039966]	2852	GO:0005802|GO:0005515|GO:0030054|GO:0045599|GO:0019228|GO:0005622|GO:0032024|GO:0005496|GO:0048786|GO:0045745|GO:0005794|GO:0030335|GO:0031966|GO:0045742|GO:0004930|GO:0014069|GO:0014068|GO:0044327|GO:0043280|GO:0042734|GO:0007049|GO:0007186|GO:0005887|GO:0045087|GO:0005789|GO:0030263|GO:0030264|GO:0032962|GO:0001956|GO:0030424|GO:0048471|GO:0008284|GO:0008285|GO:0005886|GO:0005783|GO:0030819|GO:…	1133395	chr7	1133336	+	hs|7p22.3	NM_001039966	chr7:1133336-1133395	NM_001039966	Hs.20961
A_23_P425750	-2.56745	-1.36033	2.56745	down	armadillo repeat containing 6	ARMC6	FALSE	Homo sapiens armadillo repeat containing 6 (ARMC6), transcript variant 2, mRNA [NM_033415]	93436		19168564	chr19	19168505	+	hs|19p13.11	NM_033415	chr19:19168505-19168564	NM_033415	Hs.77876
A_33_P3236661	-2.56671	-1.35992	2.56671	down	protocadherin 9	PCDH9	FALSE	Homo sapiens protocadherin 9, mRNA (cDNA clone MGC:167030 IMAGE:8860363), complete cds. [BC150296]	5101	GO:0005886|GO:0005509|GO:0030900|GO:0016021|GO:0007156	67798730	chr13	67798671	-	hs|13q21.32	BC150296	chr13:67798730-67798671		Hs.654709
A_23_P324754	-2.56639	-1.35974	2.56639	down	cell migration inducing protein, hyaluronan binding	CEMIP	FALSE	Homo sapiens cell migration inducing protein, hyaluronan binding (CEMIP), transcript variant 3, mRNA [NM_018689]	57214	GO:0005515|GO:0010800|GO:0030335|GO:0046923|GO:0032050|GO:0005886|GO:0005783|GO:0007605|GO:0090314|GO:0005576|GO:0005634|GO:0030665|GO:0005737|GO:0005905|GO:0005540|GO:1900020|GO:0004415|GO:0030214|GO:0051281	81243693	chr15	81243634	+	hs|15q25.1	NM_018689	chr15:81243634-81243693	NM_018689	Hs.459088
A_33_P3354414	-2.56521	-1.35907	2.56521	down	aldehyde oxidase 1	AOX1	FALSE	Homo sapiens aldehyde oxidase 1 (AOX1), mRNA [NM_001159]	316	GO:0008762|GO:0005506|GO:0051537|GO:0004854|GO:0072593|GO:0042816|GO:0050660|GO:0006767|GO:0009055|GO:0044281|GO:0005829|GO:0004031|GO:0043546|GO:0051287|GO:0006954|GO:0006766|GO:0070062|GO:0055114	201534464	chr2	201534405	+	hs|2q33.1	NM_001159	chr2:201534405-201534464	NM_001159	Hs.406238
A_23_P88904	-2.56252	-1.35756	2.56252	down	nth endonuclease III-like 1 (E. coli)	NTHL1	FALSE	Homo sapiens nth endonuclease III-like 1 (E. coli) (NTHL1), mRNA [NM_002528]	4913	GO:0003906|GO:0005515|GO:0051539|GO:0005634|GO:0046872|GO:0005739|GO:0019104|GO:0003690|GO:0004519|GO:0006281|GO:0006296|GO:0006284|GO:0045008|GO:0006285|GO:0005654|GO:0000737	2094667	chr16	2093705	-	hs|16p13.3	NM_002528	chr16:2094667-2093705	NM_002528	Hs.66196
A_23_P47790	-2.55771	-1.35485	2.55771	down	methyltransferase like 1	METTL1	FALSE	Homo sapiens methyltransferase like 1 (METTL1), transcript variant 1, mRNA [NM_005371]	4234	GO:0005515|GO:0005737|GO:0000049|GO:0030488|GO:0005730|GO:0008176|GO:0005634|GO:0006400	58162716	chr12	58162657	-	hs|12q14.1	NM_005371	chr12:58162716-58162657	NM_005371	Hs.42957
A_23_P139912	-2.55583	-1.35379	2.55583	down	insulin-like growth factor binding protein 6	IGFBP6	FALSE	Homo sapiens insulin-like growth factor binding protein 6 (IGFBP6), mRNA [NM_002178]	3489	GO:0007165|GO:0008285|GO:0005794|GO:0031994|GO:0005576|GO:0044267|GO:0005615|GO:0001558|GO:0070062	53494912	chr12	53494853	+	hs|12q13.13	NM_002178	chr12:53494853-53494912	NM_002178	Hs.274313
A_23_P342709	-2.55577	-1.35376	2.55577	down	F-box protein 15	FBXO15	FALSE	Homo sapiens F-box protein 15 (FBXO15), transcript variant 1, mRNA [NM_152676]	201456	GO:0019005	71740797	chr18	71740738	-	hs|18q22.3	NM_152676	chr18:71740797-71740738	NM_152676	Hs.664011
A_33_P3232945	-2.55404	-1.35278	2.55404	down	coagulation factor II (thrombin) receptor-like 1	F2RL1	FALSE	Homo sapiens coagulation factor II (thrombin) receptor-like 1 (F2RL1), mRNA [NM_005242]	2150	GO:0005515|GO:0043311|GO:0070963|GO:0046330|GO:0050900|GO:0060100|GO:0046328|GO:0051607|GO:0046329|GO:0030836|GO:0031274|GO:0070374|GO:0043123|GO:0090195|GO:0043122|GO:2000484|GO:0090198|GO:0072608|GO:0031681|GO:0030335|GO:0005794|GO:0004930|GO:0050702|GO:0014068|GO:0010804|GO:0072643|GO:0007186|GO:0005887|GO:0045087|GO:0042119|GO:0034145|GO:0005886|GO:0034141|GO:0015057|GO:0034140|GO:0035025|GO:…	76131044	chr5	76130985	+	hs|5q13.3	NM_005242	chr5:76130985-76131044	NM_005242	Hs.744181
A_33_P3375894	-2.55024	-1.35063	2.55024	down			FALSE				209406462	chr1	209406403	+	hs|1q32.2		chr1:209406403-209406462
A_32_P155247	-2.54946	-1.35019	2.54946	down	ferritin, light polypeptide	FTL	FALSE	Homo sapiens ferritin, light polypeptide (FTL), mRNA [NM_000146]	2512	GO:0005515|GO:0008219|GO:0005506|GO:0006892|GO:0055072|GO:0055085|GO:0005829|GO:0008199|GO:0042802|GO:0006879|GO:0008043|GO:0006826|GO:0061024|GO:0070062	49469088	chr19	49469029	+	hs|19q13.33	NM_000146	chr19:49469029-49469088	NM_000146	Hs.433670
A_33_P3361811	-2.54924	-1.35007	2.54924	down	N(alpha)-acetyltransferase 16, NatA auxiliary subunit	NAA16	FALSE	Homo sapiens N(alpha)-acetyltransferase 16, NatA auxiliary subunit (NAA16), transcript variant 1, mRNA [NM_024561]	79612	GO:0005515|GO:0031415|GO:0005667|GO:0043066|GO:0004596|GO:0050821|GO:0005634|GO:0005737|GO:0043022|GO:0016407|GO:0045893|GO:0006474|GO:0070062	41936294	chr13	41936235	+	hs|13q14.11	NM_024561	chr13:41936235-41936294	NM_024561	Hs.512914
A_23_P150903	-2.54843	-1.34961	2.54843	down	fatty acyl CoA reductase 2	FAR2	FALSE	Homo sapiens fatty acyl CoA reductase 2 (FAR2), transcript variant 2, mRNA [NM_018099]	55711	GO:0005782|GO:0008611|GO:0005789|GO:0044281|GO:0016021|GO:0080019|GO:0035336|GO:0050062|GO:0044255|GO:0005778|GO:0055114|GO:0005777	29486586	chr12	29485623	+	hs|12p11.22	NM_018099	chr12:29485623-29486586	NM_018099	Hs.728955
A_24_P404245	-2.5467	-1.34863	2.5467	down	phosphate cytidylyltransferase 2, ethanolamine	PCYT2	FALSE	Homo sapiens phosphate cytidylyltransferase 2, ethanolamine (PCYT2), transcript variant 2, mRNA [NM_002861]	5833	GO:0006646|GO:0004306|GO:0005789|GO:0044281|GO:0008654|GO:0005575|GO:0006644|GO:0046474	79862985	chr17	79862805	-	hs|17q25.3	NM_002861	chr17:79862985-79862805	NM_002861	Hs.569843
A_33_P3833478	-2.5464	-1.34846	2.5464	down	Sp3 transcription factor pseudogene	SP3P	FALSE	Homo sapiens Sp3 transcription factor pseudogene, mRNA (cDNA clone IMAGE:5266022). [BC036697]	160824		90012624	chr13	90012565	-	hs|13q31.3	BC036697	chr13:90012624-90012565		Hs.407509
A_24_P270460	-2.54589	-1.34817	2.54589	down	interferon, alpha-inducible protein 27	IFI27	FALSE	Homo sapiens interferon, alpha-inducible protein 27 (IFI27), transcript variant 2, mRNA [NM_005532]	3429	GO:0005739|GO:0003674|GO:0060337|GO:0006919|GO:0019221|GO:0005741|GO:0016021|GO:0097190	94583026	chr14	94582967	+	hs|14q32.12	NM_005532	chr14:94582967-94583026	NM_005532	Hs.532634
A_23_P118254	-2.54558	-1.34799	2.54558	down	forkhead box F1	FOXF1	FALSE	Homo sapiens forkhead box F1 (FOXF1), mRNA [NM_001451]	2294	GO:0007389|GO:0006366|GO:0003705|GO:0001756|GO:0007224|GO:0007507|GO:0016337|GO:0003690|GO:0030198|GO:0060438|GO:0043305|GO:0000977|GO:0030335|GO:0048286|GO:0051150|GO:0008301|GO:0000122|GO:0001701|GO:0045198|GO:0060441|GO:0072189|GO:0071345|GO:0072001|GO:0060446|GO:0045893|GO:0008134|GO:0051145|GO:0060426|GO:0007368|GO:0030324|GO:0030323|GO:0010811|GO:0005634|GO:0003214|GO:0051090|GO:0045944|GO:…	86547745	chr16	86547686	+	hs|16q24.1	NM_001451	chr16:86547686-86547745	NM_001451	Hs.155591
A_23_P134854	-2.54382	-1.347	2.54382	down	claudin 23	CLDN23	FALSE	Homo sapiens claudin 23 (CLDN23), mRNA [NM_194284]	137075	GO:0016338|GO:0070830|GO:0005886|GO:0005198|GO:0034329|GO:0016021|GO:0005923|GO:0045216|GO:0042802	8561472	chr8	8561413	+	hs|8p23.1	NM_194284	chr8:8561413-8561472	NM_194284	Hs.183617
A_23_P10232	-2.54346	-1.34679	2.54346	down	B-cell scaffold protein with ankyrin repeats 1	BANK1	FALSE	Homo sapiens B-cell scaffold protein with ankyrin repeats 1 (BANK1), transcript variant 1, mRNA [NM_017935]	55024	GO:0042113	102995632	chr4	102995573	+	hs|4q24	NM_017935	chr4:102995573-102995632	NM_017935	Hs.480400
A_23_P150255	-2.54207	-1.346	2.54207	down	RNA binding motif protein 14	RBM14	FALSE	Homo sapiens RNA binding motif protein 14 (RBM14), transcript variant 1, mRNA [NM_006328]	10432	GO:0005515|GO:0005667|GO:0016575|GO:0001104|GO:0006366|GO:0003723|GO:0005730|GO:0005634|GO:0006310|GO:0006260|GO:0030374|GO:0006281|GO:0000166|GO:0045944|GO:0042921|GO:0030529|GO:0016592|GO:0009725|GO:0030674|GO:0030520	66394752	chr11	66394693	+	hs|11q13.2	NM_006328	chr11:66394693-66394752	NM_006328	Hs.533712
A_33_P3301689	-2.53753	-1.34343	2.53753	down	zinc finger protein 326	ZNF326	FALSE	Homo sapiens zinc finger protein 326 (ZNF326), transcript variant 3, mRNA [NM_182975]	284695	GO:0044609|GO:0008380|GO:0006397|GO:0005515|GO:0032784|GO:0000993|GO:0008270|GO:0005681|GO:0045893|GO:0003677|GO:0016363|GO:0006351	90470807	chr1	90470748	+	hs|1p22.2	NM_182975	chr1:90470748-90470807	NM_182975	Hs.306221
A_33_P3268793	-2.53702	-1.34313	2.53702	down	adenosine deaminase, tRNA-specific 3	ADAT3	FALSE	Homo sapiens adenosine deaminase, tRNA-specific 3 (ADAT3), mRNA [NM_138422]	113179	GO:0016787|GO:0008270|GO:0008033	1913443	chr19	1913384	+	hs|19p13.3	NM_138422	chr19:1913384-1913443	NM_138422	Hs.144980
A_24_P21410	-2.5359	-1.3425	2.5359	down	nucleolar protein 6 (RNA-associated)	NOL6	FALSE	Homo sapiens nucleolar protein 6 (RNA-associated) (NOL6), transcript variant alpha, mRNA [NM_022917]	65083	GO:0005739|GO:0000794|GO:0006364|GO:0003723|GO:0005730|GO:0005634	33462012	chr9	33461953	-	hs|9p13.3	NM_022917	chr9:33462012-33461953	NM_022917	Hs.493709
A_23_P102508	-2.53557	-1.34231	2.53557	down	solute carrier family 5 (sodium/multivitamin and iodide cotransporter), member 6	SLC5A6	FALSE	Homo sapiens solute carrier family 5 (sodium/multivitamin and iodide cotransporter), member 6 (SLC5A6), transcript variant 1, mRNA [NM_021095]	8884	GO:0012506|GO:0015887|GO:0005886|GO:0015939|GO:0006768|GO:0006767|GO:0044281|GO:0031526|GO:0055085|GO:0016020|GO:0005887|GO:0006766|GO:0008523|GO:0006810|GO:0015878|GO:0006814	27423111	chr2	27423052	-	hs|2p23.3	NM_021095	chr2:27423111-27423052	NM_021095	Hs.435735
A_23_P98431	-2.53547	-1.34225	2.53547	down	hydroxymethylbilane synthase	HMBS	FALSE	Homo sapiens hydroxymethylbilane synthase (HMBS), transcript variant 1, mRNA [NM_000190]	3145	GO:0018160|GO:0006778|GO:0044281|GO:0006782|GO:0004418|GO:0006783|GO:0005829	118964188	chr11	118964129	+	hs|11q23.3	NM_000190	chr11:118964129-118964188	NM_000190	Hs.82609
A_33_P3253214	-2.53513	-1.34206	2.53513	down			FALSE	histone cluster 2, H2aa3 [Source:HGNC Symbol;Acc:4736] [ENST00000369161]			149823191	chr1	149823132	+	hs|1q21.2	L19779	chr1:149823132-149823191		Hs.530461
A_24_P243741	-2.53485	-1.3419	2.53485	down	ADAM metallopeptidase domain 22	ADAM22	FALSE	Homo sapiens ADAM metallopeptidase domain 22 (ADAM22), transcript variant 5, mRNA [NM_021721]	53616	GO:0005515|GO:0008344|GO:0007162|GO:0005178|GO:0022011|GO:0006508|GO:0008270|GO:0016021|GO:0007417|GO:0007155|GO:0004222	87795237	chr7	87795178	+	hs|7q21.12	NM_021721	chr7:87795178-87795237	NM_021721	Hs.256398
A_33_P3318288	-2.53462	-1.34177	2.53462	down	complement factor H	CFH	FALSE	Homo sapiens complement factor H (CFH), transcript variant 2, mRNA [NM_001014975]	3075	GO:0006957|GO:0005515|GO:0030449|GO:0006956|GO:0045087|GO:0072562|GO:0043395|GO:0005576|GO:0008201|GO:0005615	196659305	chr1	196659246	+	hs|1q31.3	NM_001014975	chr1:196659246-196659305	NM_001014975	Hs.363396
A_32_P135336	-2.53435	-1.34162	2.53435	down	coiled-coil domain containing 101 pseudogene	LOC388242	FALSE	Homo sapiens coiled-coil domain containing 101 pseudogene (LOC388242), non-coding RNA [NR_002556]	388242		29476353	chr16	29476294	-	hs|16p11.2	NR_002556	chr16:29476353-29476294	NR_002556	Hs.662549
A_19_P00331359	-2.53396	-1.34139	2.53396	down			FALSE				106558645	chr3	106558586	-	hs|3q13.12		chr3:106558645-106558586
A_23_P136573	-2.53346	-1.34111	2.53346	down	ST3 beta-galactoside alpha-2,3-sialyltransferase 5	ST3GAL5	FALSE	Homo sapiens ST3 beta-galactoside alpha-2,3-sialyltransferase 5 (ST3GAL5), transcript variant 1, mRNA [NM_003896]	8869	GO:0030173|GO:0008373|GO:0047291|GO:0000139|GO:0005975|GO:0005887|GO:0004513|GO:0006688|GO:0001574|GO:0006486|GO:0016021	86067218	chr2	86067159	-	hs|2p11.2	NM_003896	chr2:86067218-86067159	NM_003896	Hs.415117
A_23_P391396	-2.52902	-1.33858	2.52902	down	early B-cell factor 3	EBF3	FALSE	Homo sapiens early B-cell factor 3 (EBF3), mRNA [NM_001005463]	253738	GO:0046983|GO:0007275|GO:0005634|GO:0045893|GO:0003677|GO:0046872|GO:0006351	131633847	chr10	131633788	-	hs|10q26.3	NM_001005463	chr10:131633847-131633788	NM_001005463	Hs.591374
A_33_P3376947	-2.5289	-1.33851	2.5289	down	ATP-binding cassette, sub-family B (MDR/TAP), member 9	ABCB9	FALSE	ATP-binding cassette, sub-family B (MDR/TAP), member 9 [Source:HGNC Symbol;Acc:50] [ENST00000537276]	23457	GO:0005515|GO:0002474|GO:0006200|GO:0005783|GO:0030176|GO:0005765|GO:0015031|GO:0055085|GO:0005524|GO:0005764|GO:0042803|GO:0015833|GO:0022891|GO:0016021|GO:0015440|GO:0005769	123416788	chr12	123416729	-	hs|12q24.31	AK027624	chr12:123416788-123416729
A_33_P3299066	-2.52777	-1.33786	2.52777	down	nuclear receptor subfamily 4, group A, member 2	NR4A2	FALSE	Homo sapiens nuclear receptor subfamily 4, group A, member 2 (NR4A2), mRNA [NM_006186]	4929	GO:0005515|GO:0008344|GO:0010467|GO:0021986|GO:0006367|GO:0003707|GO:0016265|GO:0005634|GO:0009791|GO:0042053|GO:0042416|GO:0043576|GO:0043524|GO:0005737|GO:0010035|GO:0045944|GO:0031668|GO:0043401|GO:0004879|GO:0001666|GO:0046982|GO:0042551|GO:0021952|GO:0051866|GO:0043085|GO:0006351|GO:0043565|GO:0007165|GO:0001975|GO:0071542|GO:0008270|GO:0005654|GO:0017085|GO:0034599|GO:0001764|GO:0030522	157182315	chr2	157182256	-	hs|2q24.1	NM_006186	chr2:157182315-157182256	NM_006186	Hs.563344
A_24_P45446	-2.52593	-1.33681	2.52593	down	guanylate binding protein 4	GBP4	FALSE	Homo sapiens guanylate binding protein 4 (GBP4), mRNA [NM_052941]	115361	GO:0006184|GO:0005737|GO:0003924|GO:0005634|GO:0005525	89647795	chr1	89647736	-	hs|1p22.2	NM_052941	chr1:89647795-89647736	NM_052941	Hs.409925
A_23_P144916	-2.52339	-1.33537	2.52339	down	glutamine-fructose-6-phosphate transaminase 2	GFPT2	FALSE	Homo sapiens glutamine-fructose-6-phosphate transaminase 2 (GFPT2), mRNA [NM_005110]	9945	GO:0016051|GO:0004360|GO:0006112|GO:0030246|GO:0006488|GO:0006048|GO:0044267|GO:0006002|GO:0043687|GO:0018279|GO:0006541|GO:0005829	179727826	chr5	179727767	-	hs|5q35.3	NM_005110	chr5:179727826-179727767	NM_005110	Hs.696497
A_23_P110571	-2.52272	-1.33498	2.52272	down	microtubule associated serine/threonine kinase family member 4	MAST4	FALSE	Homo sapiens microtubule associated serine/threonine kinase family member 4 (MAST4), transcript variant 3, mRNA [NM_001164664]	375449	GO:0005737|GO:0000287|GO:0004674|GO:0006468|GO:0005524	66462867	chr5	66462808	+	hs|5q12.3	NM_001164664	chr5:66462808-66462867	NM_001164664	Hs.595458
A_23_P78037	-2.51941	-1.33308	2.51941	down	chemokine (C-C motif) ligand 7	CCL7	FALSE	Homo sapiens chemokine (C-C motif) ligand 7 (CCL7), mRNA [NM_006273]	6354	GO:0008009|GO:0030335|GO:0008360|GO:0006874|GO:0007267|GO:0005576|GO:0005615|GO:0002548|GO:0031726|GO:0007165|GO:0071361|GO:0006955|GO:0006954|GO:0006935|GO:0031727|GO:0007010|GO:0048245|GO:0010332|GO:0008201|GO:2000503	32598859	chr17	32598800	+	hs|17q12	NM_006273	chr17:32598800-32598859	NM_006273	Hs.251526
A_33_P3350074	-2.5141	-1.33004	2.5141	down	solute carrier family 25 (mitochondrial thiamine pyrophosphate carrier), member 19	SLC25A19	FALSE	Homo sapiens solute carrier family 25 (mitochondrial thiamine pyrophosphate carrier), member 19 (SLC25A19), transcript variant 1, mRNA [NM_001126121]	60386	GO:0030302|GO:0005743|GO:0005634|GO:0016021|GO:0055085|GO:0030233	73269133	chr17	73269074	-	hs|17q25.1	NM_001126121	chr17:73269133-73269074	NM_001126121	Hs.514470
A_23_P200780	-2.5138	-1.32987	2.5138	down	transforming growth factor, beta receptor III	TGFBR3	FALSE	Homo sapiens transforming growth factor, beta receptor III (TGFBR3), transcript variant 1, mRNA [NM_003243]	7049	GO:0005515|GO:0055010|GO:0050680|GO:0046332|GO:0005615|GO:0005114|GO:0034695|GO:0007179|GO:0032354|GO:0070062|GO:0009986|GO:0017134|GO:0043393|GO:0030509|GO:0030165|GO:0005160|GO:0060038|GO:0060347|GO:0001889|GO:0007181|GO:0005887|GO:0016049|GO:0060389|GO:0009897|GO:0005783|GO:0031100|GO:0010719|GO:0001837|GO:0005539|GO:0034673|GO:0035556|GO:0060317|GO:0060318|GO:0006955|GO:0051092|GO:0048185|GO:…	92148947	chr1	92148888	-	hs|1p22.1	NM_003243	chr1:92148947-92148888	NM_003243	Hs.482390
A_23_P102832	-2.50955	-1.32743	2.50955	down	centrosomal protein 250kDa	CEP250	FALSE	Homo sapiens centrosomal protein 250kDa (CEP250), mRNA [NM_007186]	11190	GO:0005515|GO:0048471|GO:0005813|GO:0010457|GO:0005815|GO:0019901|GO:0005814|GO:0008022|GO:0005829|GO:0043234|GO:0005929|GO:0030997|GO:0008104|GO:0000086|GO:0031616|GO:0000278|GO:0070062	34099640	chr20	34099581	+	hs|20q11.22	NM_007186	chr20:34099581-34099640	NM_007186	Hs.443976
A_23_P250212	-2.50943	-1.32736	2.50943	down	homolog of rat pragma of Rnd2	SGK223	FALSE	Homo sapiens homolog of rat pragma of Rnd2 (SGK223), mRNA [NM_001080826]	157285	GO:0018108|GO:0005524|GO:0004715	8175388	chr8	8175329	-	hs|8p23.1	NM_001080826	chr8:8175388-8175329	NM_001080826	Hs.657673
A_23_P4611	-2.50771	-1.32637	2.50771	down	solute carrier family 27 (fatty acid transporter), member 5	SLC27A5	FALSE	Homo sapiens solute carrier family 27 (fatty acid transporter), member 5 (SLC27A5), mRNA [NM_012254]	10998	GO:0015245|GO:0000038|GO:0005783|GO:0006699|GO:0030176|GO:0044281|GO:0032403|GO:0005524|GO:0043234|GO:0015911|GO:0009925|GO:0047747|GO:0046951|GO:0015721|GO:0005789|GO:0008206|GO:0031957|GO:0006642	59009780	chr19	59009721	-	hs|19q13.43	NM_012254	chr19:59009780-59009721	NM_012254	Hs.292177
A_33_P3405424	-2.50698	-1.32595	2.50698	down	interleukin 4 induced 1	IL4I1	FALSE	Homo sapiens interleukin 4 induced 1 (IL4I1), transcript variant 1, mRNA [NM_152899]	259307	GO:0001716|GO:0005576|GO:0005764|GO:0055114	50392976	chr19	50392917	-	hs|19q13.33	NM_152899	chr19:50392976-50392917	NM_152899	Hs.741750
A_33_P3270657	-2.5061	-1.32544	2.5061	down	family with sequence similarity 111, member B	FAM111B	FALSE	Homo sapiens family with sequence similarity 111, member B (FAM111B), transcript variant 1, mRNA [NM_198947]	374393	GO:0008152|GO:0003824	58894860	chr11	58894801	+	hs|11q12.1	NM_198947	chr11:58894801-58894860	NM_198947	Hs.186579
A_24_P313180	-2.50499	-1.3248	2.50499	down	chromosome 14 open reading frame 1	C14orf1	FALSE	chromosome 14 open reading frame 1 [Source:HGNC Symbol;Acc:1187] [ENST00000256319]	11161	GO:0030133|GO:0008150|GO:0003674|GO:0016126|GO:0005789|GO:0016021	76117049	chr14	76116990	-	hs|14q24.3	AF134159	chr14:76117049-76116990		Hs.15106
A_23_P423482	-2.50152	-1.32281	2.50152	down	family with sequence similarity 81, member A	FAM81A	FALSE	Homo sapiens family with sequence similarity 81, member A (FAM81A), mRNA [NM_152450]	145773		59814860	chr15	59814801	+	hs|15q22.2	NM_152450	chr15:59814801-59814860	NM_152450	Hs.531168
A_23_P91829	-2.50077	-1.32237	2.50077	down	discoidin, CUB and LCCL domain containing 2	DCBLD2	FALSE	Homo sapiens discoidin, CUB and LCCL domain containing 2 (DCBLD2), mRNA [NM_080927]	131566	GO:0005515|GO:0030308|GO:0009986|GO:0005887|GO:0042060|GO:0007155|GO:0030522	98517685	chr3	98517626	-	hs|3q12.1	NM_080927	chr3:98517685-98517626	NM_080927	Hs.203691
A_23_P422115	-2.49524	-1.31918	2.49524	down	chromosome 9 open reading frame 116	C9orf116	FALSE	Homo sapiens chromosome 9 open reading frame 116 (C9orf116), transcript variant 1, mRNA [NM_001048265]	138162		138387180	chr9	138387121	-	hs|9q34.3	NM_001048265	chr9:138387180-138387121	NM_001048265	Hs.414028
A_23_P159227	-2.49196	-1.31728	2.49196	down	ADAM metallopeptidase domain 15	ADAM15	FALSE	Homo sapiens ADAM metallopeptidase domain 15 (ADAM15), transcript variant 1, mRNA [NM_207191]	8751	GO:0005515|GO:0017124|GO:0001669|GO:0005886|GO:0042995|GO:0001525|GO:0042246|GO:0060317|GO:0005912|GO:0007160|GO:0022617|GO:0030198|GO:0030574|GO:0006508|GO:0008270|GO:0016021|GO:0004222|GO:0008237	155030598	chr1	155030539	+	hs|1q22	NM_207191	chr1:155030539-155030598	NM_207191	Hs.312098
A_33_P3355014	-2.48949	-1.31585	2.48949	down	transmembrane protein 229B	TMEM229B	FALSE	Homo sapiens transmembrane protein 229B (TMEM229B), mRNA [NM_182526]	161145	GO:0016021	67937042	chr14	67936983	-	hs|14q24.1	NM_182526	chr14:67937042-67936983	NM_182526	Hs.509707
A_33_P3258117	-2.4886	-1.31533	2.4886	down	helicase, lymphoid-specific	HELLS	FALSE	Homo sapiens helicase, lymphoid-specific (HELLS), transcript variant 7, mRNA [NM_001289072]	3070	GO:0005515|GO:0043066|GO:0031508|GO:0006346|GO:0001655|GO:0004386|GO:0005634|GO:0007275|GO:2001243|GO:0003677|GO:0005524|GO:0006351|GO:0010216|GO:0007067|GO:0005721|GO:0003682|GO:0046651|GO:0000775	96334492	chr10	96334433	+	hs|10q23.33	NM_001289072	chr10:96334433-96334492	NM_001289072	Hs.655830
A_33_P3377714	-2.4881	-1.31504	2.4881	down			FALSE				75680975	chr9	75680916	-	hs|9q21.13		chr9:075680975-075680916
A_19_P00331726	-2.48772	-1.31483	2.48772	down			FALSE				53579018	chr4	53578959	-	hs|4q12		chr4:053579018-053578959
A_24_P36847	-2.4857	-1.31365	2.4857	down	DEAH (Asp-Glu-Ala-His) box helicase 9	DHX9	FALSE	Homo sapiens DEAH (Asp-Glu-Ala-His) box helicase 9 (DHX9), transcript variant 1, mRNA [NM_001357]	1660	GO:0005515|GO:0008380|GO:0003724|GO:0010467|GO:0006200|GO:0005634|GO:0005829|GO:0004004|GO:0034605|GO:0005737|GO:0004003|GO:0001085|GO:0032481|GO:0032508|GO:0005813|GO:0070934|GO:0005730|GO:0005524|GO:0003677|GO:0001649|GO:0016020|GO:0000398|GO:0030529|GO:0045087|GO:0007623|GO:0005654|GO:0070937	182856315	chr1	182856256	+	hs|1q25.3	NM_001357	chr1:182856256-182856315	NM_001357	Hs.191518
A_24_P286951	-2.48278	-1.31196	2.48278	down	pleckstrin homology domain containing, family S member 1	PLEKHS1	FALSE	Homo sapiens pleckstrin homology domain containing, family S member 1 (PLEKHS1), transcript variant 4, mRNA [NM_024889]	79949		115542130	chr10	115542071	+	hs|10q25.3	NM_024889	chr10:115542071-115542130	NM_024889	Hs.228320
A_19_P00321504	-2.47773	-1.30902	2.47773	down			FALSE	Homo sapiens chromosome 15 sno-lncRNA1 snoRNA, complete sequence. [JX629740]			25312677	chr15	25312618	+	hs|15q11.2	JX629740	chr15:25312618-25312677		Hs.578617
A_33_P3317628	-2.4777	-1.309	2.4777	down	plakophilin 3	PKP3	FALSE	Homo sapiens plakophilin 3 (PKP3), mRNA [NM_007183]	11187	GO:0030057|GO:0016337|GO:0005886|GO:0005911|GO:0005634|GO:0002159|GO:0090002|GO:0050839	404907	chr11	404848	+	hs|11p15.5	NM_007183	chr11:404848-404907	NM_007183	Hs.534395
A_24_P284324	-2.47692	-1.30855	2.47692	down	transmembrane protein 104	TMEM104	FALSE	Homo sapiens transmembrane protein 104 (TMEM104), mRNA [NM_017728]	54868	GO:0008150|GO:0003674|GO:0016021|GO:0005575	72835696	chr17	72835637	+	hs|17q25.1	NM_017728	chr17:72835637-72835696	NM_017728	Hs.370262
A_33_P3237574	-2.47682	-1.30849	2.47682	down	major histocompatibility complex, class I, A	HLA-A	FALSE	Homo sapiens major histocompatibility complex, class I, A (HLA-A), transcript variant 2 (A*01:01:01:01 allele), mRNA [NM_001242758]	3105	GO:0005515|GO:0002474|GO:0005886|GO:0005783|GO:0019221|GO:0042608|GO:0006955|GO:0060337|GO:0042605|GO:0030670|GO:0071556|GO:0016032|GO:0070062|GO:0060333|GO:0042270|GO:0032729|GO:0012507|GO:0030881|GO:0002480|GO:0005794|GO:0002486|GO:0009986|GO:2000568|GO:0042612|GO:0005797|GO:0005102|GO:0042590|GO:0070971|GO:0050690|GO:0000139|GO:0005887|GO:0001916|GO:0031901|GO:0050776|GO:0002479|GO:0016045|GO:…	29910402	chr6	29910343	+	hs|6p22.1	NM_001242758	chr6:29910343-29910402	NM_001242758	Hs.181244
A_33_P3322046	-2.47526	-1.30758	2.47526	down			FALSE	Q5JNZ5_HUMAN (Q5JNZ5) Ribosomal protein S26-like 1, partial (41%) [THC2596076]			72554039	chr10	72553980	-	hs|10q22.1		chr10:072554039-072553980
A_23_P7144	-2.47437	-1.30706	2.47437	down	chemokine (C-X-C motif) ligand 1 (melanoma growth stimulating activity, alpha)	CXCL1	FALSE	Homo sapiens chemokine (C-X-C motif) ligand 1 (melanoma growth stimulating activity, alpha) (CXCL1), transcript variant 1, mRNA [NM_001511]	2919	GO:0008009|GO:0030036|GO:0008285|GO:0008283|GO:0005102|GO:0005576|GO:0043085|GO:0005615|GO:0007399|GO:0035556|GO:0007165|GO:0006955|GO:0006954|GO:0006935|GO:0007186|GO:0060326|GO:0008047|GO:0008083	74736909	chr4	74736850	+	hs|4q13.3	NM_001511	chr4:74736850-74736909	NM_001511	Hs.789
A_32_P219279	-2.4722	-1.30579	2.4722	down	extracellular leucine-rich repeat and fibronectin type III domain containing 2	ELFN2	FALSE	Homo sapiens extracellular leucine-rich repeat and fibronectin type III domain containing 2 (ELFN2), transcript variant 1, mRNA [NM_052906]	114794	GO:0019902|GO:0010923|GO:0004864|GO:0016021|GO:0005615	37764246	chr22	37764187	-	hs|22q13.1	NM_052906	chr22:37764246-37764187	NM_052906	Hs.660812
A_23_P258689	-2.47209	-1.30573	2.47209	down	HEAT repeat containing 2	HEATR2	FALSE	Homo sapiens HEAT repeat containing 2 (HEATR2), transcript variant 1, mRNA [NM_017802]	54919	GO:0005737	825507	chr7	825448	+	hs|7p22.3	NM_017802	chr7:825448-825507	NM_017802	Hs.535896
A_23_P99515	-2.4663	-1.30235	2.4663	down	mesenteric estrogen-dependent adipogenesis	MEDAG	FALSE	Homo sapiens mesenteric estrogen-dependent adipogenesis (MEDAG), mRNA [NM_032849]	84935	GO:0005737|GO:0045600	31499358	chr13	31499299	+	hs|13q12.3	NM_032849	chr13:31499299-31499358	NM_032849	Hs.147880
A_23_P105138	-2.46543	-1.30184	2.46543	down	catalase	CAT	FALSE	Homo sapiens catalase (CAT), mRNA [NM_001752]	847	GO:0050661|GO:0001657|GO:0009650|GO:0020027|GO:0005782|GO:0005886|GO:0004096|GO:0005783|GO:0044281|GO:0042697|GO:0005764|GO:0046872|GO:0042803|GO:0043231|GO:0005829|GO:0009060|GO:0005758|GO:0006195|GO:0051092|GO:0051289|GO:0051781|GO:0033197|GO:0004046|GO:0042744|GO:0005778|GO:0070062|GO:0005777|GO:0008203|GO:0001666|GO:0043066|GO:0051262|GO:0016209|GO:0005794|GO:0001822|GO:0005102|GO:0055086|GO:…	34493093	chr11	34493034	+	hs|11p13	NM_001752	chr11:34493034-34493093	NM_001752	Hs.502302
A_23_P67391	-2.46202	-1.29984	2.46202	down	kaptin (actin binding protein)	KPTN	FALSE	Homo sapiens kaptin (actin binding protein) (KPTN), transcript variant 1, mRNA [NM_007059]	11133	GO:0048471|GO:0005815|GO:0007605|GO:0032420|GO:0006928|GO:0007015|GO:0005634|GO:0003779|GO:0015629|GO:0030426	47978389	chr19	47978369	-	hs|19q13.32	NM_007059	chr19:47978389-47978369	NM_007059	Hs.25441
A_23_P7873	-2.46134	-1.29944	2.46134	down	minichromosome maintenance complex component 3	MCM3	FALSE	Homo sapiens minichromosome maintenance complex component 3 (MCM3), transcript variant 1, mRNA [NM_002388]	4172	GO:0005515|GO:0042555|GO:0048471|GO:0005813|GO:0005658|GO:0005730|GO:0005634|GO:0003677|GO:0005524|GO:0003678|GO:0043231|GO:0006260|GO:0006271|GO:0000082|GO:0006270|GO:0005654|GO:0032508|GO:0000278	52128952	chr6	52128893	-	hs|6p12.2	NM_002388	chr6:52128952-52128893	NM_002388	Hs.179565
A_23_P117494	-2.45869	-1.29789	2.45869	down	methylenetetrahydrofolate dehydrogenase (NADP+ dependent) 1, methenyltetrahydrofolate cyclohydrolase, formyltetrahydrofolate synthetase	MTHFD1	FALSE	Homo sapiens methylenetetrahydrofolate dehydrogenase (NADP+ dependent) 1, methenyltetrahydrofolate cyclohydrolase, formyltetrahydrofolate synthetase (MTHFD1), mRNA [NM_005956]	4522	GO:0006767|GO:0009086|GO:0044281|GO:0004329|GO:0004477|GO:0005524|GO:0035999|GO:0005829|GO:0005739|GO:0004488|GO:0004486|GO:0006766|GO:0046655|GO:0009396|GO:0006730|GO:0000105|GO:0070062|GO:0055114|GO:0006164	64926555	chr14	64926496	+	hs|14q23.3	NM_005956	chr14:64926496-64926555	NM_005956	Hs.652308
A_33_P3213767	-2.45622	-1.29644	2.45622	down	coiled-coil domain containing 157	CCDC157	FALSE	Homo sapiens cDNA clone IMAGE:4798973. [BC018040]	550631		30762774	chr22	30762715	+	hs|22q12.2	BC018040	chr22:30762715-30762774		Hs.505597
A_23_P77415	-2.45537	-1.29594	2.45537	down	oxidative stress induced growth inhibitor 1	OSGIN1	FALSE	Homo sapiens oxidative stress induced growth inhibitor 1 (OSGIN1), mRNA [NM_182981]	29948	GO:0030308|GO:0007275|GO:0005575|GO:0008083|GO:0030154	83999208	chr16	83999149	+	hs|16q23.3	NM_182981	chr16:83999149-83999208	NM_182981	Hs.128055
A_24_P772488	-2.45463	-1.29551	2.45463	down	plexin A4	PLXNA4	FALSE	Homo sapiens plexin A4 (PLXNA4), transcript variant 1, mRNA [NM_020911]	91584	GO:0021960|GO:0005886|GO:0021644|GO:0048485|GO:0002116|GO:0005622|GO:0021784|GO:0021793|GO:0050923|GO:0021615|GO:0048841|GO:0017154|GO:0007411|GO:0021636|GO:0071526|GO:0016021|GO:0021610	131808746	chr7	131808687	-	hs|7q32.3	NM_020911	chr7:131808746-131808687	NM_020911	Hs.511454
A_23_P39955	-2.45424	-1.29527	2.45424	down	actin, gamma 2, smooth muscle, enteric	ACTG2	FALSE	Homo sapiens actin, gamma 2, smooth muscle, enteric (ACTG2), transcript variant 1, mRNA [NM_001615]	72	GO:0006936|GO:0072562|GO:0005856|GO:0005615|GO:0005524|GO:0071944|GO:0005829	74146759	chr2	74146700	+	hs|2p13.1	NM_001615	chr2:74146700-74146759	NM_001615	Hs.516105
A_23_P55649	-2.45393	-1.29509	2.45393	down	formyl peptide receptor 2	FPR2	FALSE	Homo sapiens formyl peptide receptor 2 (FPR2), transcript variant 1, mRNA [NM_001462]	2358	GO:0004982|GO:0006954|GO:0007186|GO:0006935|GO:0005886|GO:0004930|GO:0006928|GO:0016021|GO:0007155	52273209	chr19	52273150	+	hs|19q13.41	NM_001462	chr19:52273150-52273209	NM_001462	Hs.99855
A_23_P122852	-2.45215	-1.29405	2.45215	down	SWI/SNF related, matrix associated, actin dependent regulator of chromatin, subfamily d, member 3	SMARCD3	FALSE	Homo sapiens SWI/SNF related, matrix associated, actin dependent regulator of chromatin, subfamily d, member 3 (SMARCD3), transcript variant 2, mRNA [NM_003078]	6604	GO:0005515|GO:0071565|GO:0000790|GO:0003139|GO:0035257|GO:0005634|GO:0044281|GO:0071564|GO:0003219|GO:0042692|GO:0005737|GO:0030374|GO:0016514|GO:0006338|GO:0044255|GO:0016922|GO:0003407|GO:0006357|GO:0003713|GO:0005102|GO:0043393|GO:0002052|GO:0006337|GO:0006351|GO:0005654|GO:0045893|GO:0008134	150936124	chr7	150936065	-	hs|7q36.1	NM_003078	chr7:150936124-150936065	NM_003078	Hs.647067
A_23_P347029	-2.4521	-1.29402	2.4521	down	taste receptor, type 2, member 50	TAS2R50	FALSE	Homo sapiens taste receptor, type 2, member 50 (TAS2R50), mRNA [NM_176890]	259296	GO:0033038|GO:0007186|GO:0005886|GO:0016021|GO:0001580	11138946	chr12	11138887	-	hs|12p13.2	NM_176890	chr12:11138946-11138887	NM_176890	Hs.688194
A_33_P3346292	-2.45185	-1.29387	2.45185	down	ubiquitin associated protein 2	UBAP2	FALSE	ubiquitin associated protein 2 [Source:HGNC Symbol;Acc:14185] [ENST00000379225]	55833		33935617	chr9	33935558	-	hs|9p13.3	AY358682	chr9:33935617-33935558		Hs.493739
A_23_P3663	-2.45048	-1.29306	2.45048	down	family with sequence similarity 195, member A	FAM195A	FALSE	Homo sapiens family with sequence similarity 195, member A (FAM195A), mRNA [NM_138418]	84331		698422	chr16	698363	+	hs|16p13.3	NM_138418	chr16:698363-698422	NM_138418	Hs.706105
A_33_P3233659	-2.44987	-1.2927	2.44987	down	ribonuclease P/MRP 30kDa subunit	RPP30	FALSE	Homo sapiens ribonuclease P/MRP 30kDa subunit (RPP30), transcript variant 1, mRNA [NM_001104546]	10556	GO:0004526|GO:0005634|GO:0005655|GO:0008033	92668299	chr10	92668240	+	hs|10q23.31	NM_001104546	chr10:92668240-92668299	NM_001104546	Hs.139120
A_23_P82929	-2.44864	-1.29198	2.44864	down	nephroblastoma overexpressed	NOV	FALSE	Homo sapiens nephroblastoma overexpressed (NOV), mRNA [NM_002514]	4856	GO:0031012|GO:0010468|GO:0030424|GO:0043025|GO:0005576|GO:0008083|GO:0001558|GO:0030425|GO:0043231|GO:0005520	120436494	chr8	120436435	+	hs|8q24.12	NM_002514	chr8:120436435-120436494	NM_002514	Hs.235935
A_23_P149626	-2.44688	-1.29095	2.44688	down	pleckstrin homology domain containing, family G (with RhoGef domain) member 5	PLEKHG5	FALSE	Homo sapiens pleckstrin homology domain containing, family G (with RhoGef domain) member 5 (PLEKHG5), transcript variant 2, mRNA [NM_198681]	57449	GO:0051056|GO:0048471|GO:0048011|GO:0035767|GO:0043065|GO:0005886|GO:0007264|GO:0030139|GO:0097190|GO:0030027|GO:0005829|GO:0005737|GO:0005911|GO:0004871|GO:0005089|GO:0032319|GO:0043123	6527281	chr1	6527222	-	hs|1p36.31	NM_198681	chr1:6527281-6527222	NM_198681	Hs.284232
A_33_P3371564	-2.4459	-1.29036	2.4459	down	family with sequence similarity 86, member A pseudogene	FAM86B3P	FALSE	Homo sapiens family with sequence similarity 86, member B3, pseudogene (FAM86B3P), transcript variant 2, non-coding RNA [NR_024361]	286042		8093820	chr8	8093761	+	hs|8p23.1	NR_024361	chr8:8093761-8093820	NR_024361	Hs.656318
A_23_P318284	-2.4419	-1.288	2.4419	down	glycerol-3-phosphate dehydrogenase 1-like	GPD1L	FALSE	Homo sapiens glycerol-3-phosphate dehydrogenase 1-like (GPD1L), mRNA [NM_015141]	23171	GO:0005886|GO:0019674|GO:0044281|GO:0042803|GO:0005829|GO:0046168|GO:0060373|GO:0090038|GO:0051287|GO:0010765|GO:0033137|GO:2000010|GO:0019432|GO:0006654|GO:0044255|GO:0070062|GO:0086005|GO:0009331|GO:0005975|GO:0004367|GO:2000649|GO:0006734|GO:0044325|GO:0002027|GO:0006644|GO:0017080|GO:0046474|GO:0055114	32209930	chr3	32209871	+	hs|3p22.3	NM_015141	chr3:32209871-32209930	NM_015141	Hs.82432
A_32_P107876	-2.43828	-1.28586	2.43828	down	Fraser syndrome 1	FRAS1	FALSE	Homo sapiens Fraser syndrome 1 (FRAS1), transcript variant 1, mRNA [NM_025074]	80144	GO:0031012|GO:0007154|GO:0005886|GO:0043588|GO:0016021|GO:0015031|GO:0002009|GO:0046872	79465313	chr4	79465254	+	hs|4q21.21	NM_025074	chr4:79465254-79465313	NM_025074	Hs.369448
A_23_P139585	-2.43759	-1.28546	2.43759	down	phosphodiesterase 1B, calmodulin-dependent	PDE1B	FALSE	Homo sapiens phosphodiesterase 1B, calmodulin-dependent (PDE1B), transcript variant 1, mRNA [NM_000924]	5153	GO:0005516|GO:0048101|GO:0004117|GO:0046069|GO:0007202|GO:0042053|GO:0046872|GO:0005829|GO:0007173|GO:0043025|GO:0007626|GO:0030224|GO:0097011|GO:0006198|GO:0048011|GO:0036006|GO:0004115|GO:0006915|GO:0007165|GO:0042428|GO:0001975|GO:0007596|GO:0008543|GO:0001505|GO:0008542|GO:0045087	54972917	chr12	54972858	+	hs|12q13.2	NM_000924	chr12:54972858-54972917	NM_000924	Hs.530871
A_19_P00808377	-2.43709	-1.28516	2.43709	down			FALSE				13340345	chr4	13340286	+	hs|4p15.33		chr4:013340286-013340345
A_23_P100022	-2.43625	-1.28466	2.43625	down	synaptic vesicle glycoprotein 2B	SV2B	FALSE	Homo sapiens synaptic vesicle glycoprotein 2B (SV2B), transcript variant 1, mRNA [NM_014848]	9899	GO:0030054|GO:0001669|GO:0022857|GO:0006836|GO:0030672|GO:0016021|GO:0055085	91838388	chr15	91838329	+	hs|15q26.1	NM_014848	chr15:91838329-91838388	NM_014848	Hs.21754
A_33_P3619221	-2.43619	-1.28463	2.43619	down	zinc finger, MYND-type containing 8	ZMYND8	FALSE	Homo sapiens zinc finger, MYND-type containing 8 (ZMYND8), transcript variant 7, mRNA [NM_001281773]	23613	GO:0005515|GO:0001106|GO:0070491|GO:0008270|GO:0005634|GO:0000122	45839491	chr20	45839432	-	hs|20q13.12	NM_001281773	chr20:45839491-45839432	NM_001281773	Hs.446240
A_33_P3420013	-2.43361	-1.2831	2.43361	down			FALSE				131102087	chr3	131102028	-	hs|3q22.1		chr3:131102087-131102028
A_33_P3326772	-2.43295	-1.28271	2.43295	down	late endosomal/lysosomal adaptor, MAPK and MTOR activator 4	LAMTOR4	FALSE	Homo sapiens late endosomal/lysosomal adaptor, MAPK and MTOR activator 4 (LAMTOR4), mRNA [NM_001008395]	389541	GO:0005085|GO:0008361|GO:0071986|GO:0032947|GO:0032008|GO:0071230|GO:0005764|GO:0043087|GO:0043231	99751829	chr7	99751770	+	hs|7q22.1	NM_001008395	chr7:99751770-99751829	NM_001008395	Hs.406520
A_23_P143143	-2.42918	-1.28047	2.42918	down	inhibitor of DNA binding 2, dominant negative helix-loop-helix protein	ID2	FALSE	Homo sapiens inhibitor of DNA binding 2, dominant negative helix-loop-helix protein (ID2), mRNA [NM_002166]	3398	GO:0001656|GO:0005515|GO:0043353|GO:2000045|GO:0071158|GO:0048541|GO:0009649|GO:0046983|GO:0000785|GO:0071285|GO:0005813|GO:2000178|GO:0007275|GO:0000122|GO:0045651|GO:0045787|GO:0071931|GO:0044325|GO:0043392|GO:0019216|GO:0043234|GO:0033598|GO:0045648|GO:0045600|GO:0045893|GO:0045892|GO:0090398|GO:0045578|GO:0003166|GO:0005634|GO:0045777|GO:0043433|GO:0005829|GO:0005737|GO:0021772|GO:0001779|GO:…	8823030	chr2	8822642	+	hs|2p25.1	NM_002166	chr2:8822642-8823030	NM_002166	Hs.180919
A_33_P3375613	-2.42835	-1.27998	2.42835	down	C8orf44-SGK3 readthrough	C8orf44-SGK3	FALSE	Homo sapiens C8orf44-SGK3 readthrough (C8orf44-SGK3), mRNA [NM_001204173]	100533105	GO:0030334|GO:0005515|GO:0005246|GO:0006950|GO:0015459|GO:0055085|GO:0001558|GO:0005524|GO:0005829|GO:0051090|GO:0034220|GO:0004672|GO:0004674|GO:0042127|GO:0016023|GO:0006468|GO:0055037|GO:0035091|GO:0017081|GO:0005769|GO:0017080	67772426	chr8	67772367	+	hs|8q13.1	NM_001204173	chr8:67772367-67772426	NM_001204173	Hs.613417
A_23_P417974	-2.42816	-1.27986	2.42816	down	aquaporin 11	AQP11	FALSE	Homo sapiens aquaporin 11 (AQP11), mRNA [NM_173039]	282679	GO:0005215|GO:0005886|GO:0009986|GO:0072014|GO:0005783|GO:0055085|GO:0015840|GO:0030425|GO:0005829|GO:0003674|GO:0048388|GO:0015793|GO:0051260|GO:0006833|GO:0016021|GO:0006811	77320501	chr11	77320442	+	hs|11q14.1	NM_173039	chr11:77320442-77320501	NM_173039	Hs.503345
A_33_P3245278	-2.42767	-1.27957	2.42767	down	protein tyrosine phosphatase, receptor type, G	PTPRG	FALSE	Homo sapiens protein tyrosine phosphatase, receptor type, G (PTPRG), mRNA [NM_002841]	5793	GO:0005515|GO:0007420|GO:0005887|GO:0005001|GO:0010977|GO:0007169|GO:0005615|GO:0035335|GO:0004725|GO:0070062|GO:0042802	62280573	chr3	62280514	+	hs|3p14.2	NM_002841	chr3:62280514-62280573	NM_002841	Hs.595541
A_33_P3367301	-2.42211	-1.27627	2.42211	down	gap junction protein, delta 3, 31.9kDa	GJD3	FALSE	Homo sapiens gap junction protein, delta 3, 31.9kDa (GJD3), mRNA [NM_152219]	125111	GO:0005515|GO:0034220|GO:0007154|GO:0009986|GO:0005887|GO:0005922|GO:0016264|GO:0005216	38516987	chr17	38516928	-	hs|17q21.2	NM_152219	chr17:38516987-38516928	NM_152219	Hs.444663
A_33_P3241661	-2.42156	-1.27594	2.42156	down	uncharacterized LOC388780	LOC388780	FALSE	Homo sapiens uncharacterized LOC388780 (LOC388780), mRNA [NM_001287682]	388780		2193786	chr20	2193727	+	hs|20p13	NM_001287682	chr20:2193727-2193786	NM_001287682
A_33_P3213169	-2.42122	-1.27573	2.42122	down	integrin, alpha X (complement component 3 receptor 4 subunit)	ITGAX	FALSE	integrin, alpha X (complement component 3 receptor 4 subunit) [Source:HGNC Symbol;Acc:6152] [ENST00000567409]	3687	GO:0005515|GO:0008305|GO:0005886|GO:0050900|GO:0046872|GO:0051607|GO:0007229|GO:0007596|GO:0030198|GO:0009887|GO:0004872|GO:0007155|GO:0009897	31368812	chr16	31368753	+	hs|16p11.2	AK309642	chr16:31368753-31368812		Hs.248472
A_33_P3339070	-2.41924	-1.27456	2.41924	down	long intergenic non-protein coding RNA 704	LINC00704	FALSE	Homo sapiens long intergenic non-protein coding RNA 704 (LINC00704), long non-coding RNA [NR_024475]	100216001		4692436	chr10	4692377	-	hs|10p15.1		chr10:4692436-4692377	NR_024475	Hs.634869
A_33_P3389704	-2.41716	-1.27331	2.41716	down	carboxylesterase 1	CES1	FALSE	Homo sapiens carboxylesterase 1 (CES1), transcript variant 3, mRNA [NM_001266]	1066	GO:0052689|GO:0030855|GO:0008152|GO:0009636|GO:0005788|GO:0047374	55860139	chr16	55860080	-	hs|16q12.2	NM_001266	chr16:55860139-55860080	NM_001266	Hs.558865
A_24_P403417	-2.4166	-1.27298	2.4166	down	prostaglandin E synthase	PTGES	FALSE	Homo sapiens prostaglandin E synthase (PTGES), mRNA [NM_004878]	9536	GO:0019369|GO:0019371|GO:0014070|GO:0048471|GO:0002526|GO:0006693|GO:0008285|GO:0044281|GO:0002544|GO:0051592|GO:0007165|GO:0050220|GO:0043295|GO:0001516|GO:0016020|GO:0005641|GO:0032496|GO:0005789|GO:0032526|GO:0016021|GO:0034097	132501569	chr9	132501510	-	hs|9q34.11	NM_004878	chr9:132501569-132501510	NM_004878	Hs.146688
A_33_P3229177	-2.41553	-1.27234	2.41553	down	polymerase (DNA-directed), epsilon 4, accessory subunit	POLE4	FALSE	Homo sapiens polymerase (DNA-directed), epsilon 4, accessory subunit (POLE4), mRNA [NM_019896]	56655	GO:0043565|GO:0005515|GO:0006261|GO:0008622|GO:0046982|GO:0043966|GO:0003887|GO:0005671|GO:0005634	75186531	chr2	75186472	+	hs|2p12	NM_019896	chr2:75186472-75186531	NM_019896	Hs.469060
A_24_P365807	-2.41523	-1.27216	2.41523	down	ephrin-B1	EFNB1	FALSE	Homo sapiens ephrin-B1 (EFNB1), mRNA [NM_004429]	1947	GO:0005515|GO:0048013|GO:0005886|GO:0001755|GO:0007267|GO:0045202|GO:0005634|GO:0009880|GO:0005737|GO:0046875|GO:0005887|GO:0007411|GO:0042102|GO:0045121|GO:0007155|GO:0070062	68061892	chrX	68061833	+	hs|Xq13.1	NM_004429	chrX:68061833-68061892	NM_004429	Hs.144700
A_24_P93371	-2.41494	-1.27199	2.41494	down	COMM domain containing 4	COMMD4	FALSE	Homo sapiens COMM domain containing 4 (COMMD4), transcript variant 1, mRNA [NM_017828]	54939	GO:0005515|GO:0005737	75631420	chr15	75631361	+	hs|15q24.2	NM_017828	chr15:75631361-75631420	NM_017828	Hs.351327
A_32_P101699	-2.41325	-1.27098	2.41325	down	uncharacterized LOC729887	LOC729887	FALSE	PREDICTED: Homo sapiens uncharacterized LOC729887 (LOC729887), misc_RNA [XR_243500]	729887		84151139	chr16	84151080	+	hs|16q23.3	XR_243500	chr16:84151080-84151139	XR_243500	Hs.568369
A_32_P218025	-2.41271	-1.27066	2.41271	down	uncharacterized LOC100506253	LOC100506253	FALSE	PREDICTED: Homo sapiens uncharacterized LOC100506253 (LOC100506253), ncRNA [XR_109812]	100506253		76103993	chr4	76103934	-	hs|4q13.3	XR_109812	chr4:76103993-76103934	XR_109812	Hs.136333
A_24_P706340	-2.41194	-1.27019	2.41194	down	family with sequence similarity 155, member A	FAM155A	FALSE	Homo sapiens family with sequence similarity 155, member A (FAM155A), mRNA [NM_001080396]	728215	GO:0016021	107822431	chr13	107822372	-	hs|13q33.3	NM_001080396	chr13:107822431-107822372	NM_001080396	Hs.535394
A_23_P90732	-2.41095	-1.2696	2.41095	down	paroxysmal nonkinesigenic dyskinesia	PNKD	FALSE	Homo sapiens paroxysmal nonkinesigenic dyskinesia (PNKD), transcript variant 3, mRNA [NM_001077399]	25953	GO:0005739|GO:0016020|GO:0006750|GO:0008270|GO:0005634|GO:0004416	219137553	chr2	219137494	+	hs|2q35	NM_001077399	chr2:219137494-219137553	NM_001077399	Hs.98475
A_33_P3354564	-2.40866	-1.26823	2.40866	down	glycerol-3-phosphate dehydrogenase 2 (mitochondrial)	GPD2	FALSE	Homo sapiens glycerol-3-phosphate dehydrogenase 2 (mitochondrial) (GPD2), transcript variant 1, mRNA [NM_001083112]	2820	GO:0009331|GO:0019563|GO:0005509|GO:0004368|GO:0005743|GO:0006094|GO:0044281|GO:0006072|GO:0052591|GO:0035264|GO:0043010|GO:0044255|GO:0055114	157439418	chr2	157439359	+	hs|2q24.1	NM_001083112	chr2:157439359-157439418	NM_001083112	Hs.512382
A_33_P3816688	-2.40755	-1.26757	2.40755	down	peroxisome proliferator-activated receptor gamma, coactivator 1 beta	PPARGC1B	FALSE	Homo sapiens peroxisome proliferator-activated receptor gamma, coactivator 1 beta (PPARGC1B), transcript variant 1, mRNA [NM_133263]	133522	GO:0006366|GO:0003723|GO:0050682|GO:0005634|GO:0044281|GO:2000273|GO:0051591|GO:0005739|GO:0030374|GO:0000166|GO:0045780|GO:0045944|GO:0007015|GO:0044255|GO:0006355|GO:0001104|GO:0030331|GO:0045672|GO:0051384|GO:0006390|GO:0060346|GO:0001503|GO:0016592|GO:0010694|GO:0030546|GO:0034614|GO:0005654|GO:0045892|GO:0030520|GO:0042327	149234534	chr5	149234475	+	hs|5q32	NM_133263	chr5:149234475-149234534	NM_133263	Hs.483816
A_23_P434890	-2.40716	-1.26733	2.40716	down	caspase recruitment domain family, member 10	CARD10	FALSE	Homo sapiens caspase recruitment domain family, member 10 (CARD10), mRNA [NM_014550]	29775	GO:0005515|GO:0005737|GO:0006461|GO:0032449|GO:0007250|GO:0030159|GO:0042981	37886506	chr22	37886447	-	hs|22q13.1	NM_014550	chr22:37886506-37886447	NM_014550	Hs.57973
A_33_P3279730	-2.4052	-1.26616	2.4052	down			FALSE	D-dopachrome tautomerase [Source:HGNC Symbol;Acc:2732] [ENST00000444947]			24310413	chr22	24310354	+	hs|22q11.23	XM_005261299	chr22:24310354-24310413	XM_005261299	Hs.744172
A_23_P117896	-2.40341	-1.26508	2.40341	down	transglutaminase 7	TGM7	FALSE	Homo sapiens transglutaminase 7 (TGM7), mRNA [NM_052955]	116179	GO:0018149|GO:0003810|GO:0046872	43569164	chr15	43569105	-	hs|15q15.2	NM_052955	chr15:43569164-43569105	NM_052955	Hs.164661
A_19_P00325653	-2.40315	-1.26493	2.40315	down			FALSE				32517367	chr3	32517308	+	hs|3p22.3		chr3:032517308-032517367
A_33_P3404411	-2.40283	-1.26474	2.40283	down	mitochondrial intermediate peptidase	MIPEP	FALSE	Homo sapiens mitochondrial intermediate peptidase (MIPEP), mRNA [NM_005932]	4285	GO:0005739|GO:0006627|GO:0005759|GO:0006508|GO:0004222|GO:0046872	24334295	chr13	24334236	-	hs|13q12.12	NM_005932	chr13:24334295-24334236	NM_005932	Hs.507498
A_23_P420417	-2.40133	-1.26383	2.40133	down	TLC domain containing 1	TLCD1	FALSE	Homo sapiens TLC domain containing 1 (TLCD1), transcript variant 1, mRNA [NM_138463]	116238	GO:0005886|GO:0016021	27051715	chr17	27051656	-	hs|17q11.2	NM_138463	chr17:27051715-27051656	NM_138463	Hs.499952
A_19_P00807529	-2.39838	-1.26206	2.39838	down			FALSE	Homo sapiens cDNA FLJ34029 fis, clone FCBBF2003636. [AK091348]			118588446	chr10	118588387	-	hs|10q25.3	AK091348	chr10:118588446-118588387		Hs.657012
A_33_P3301075	-2.3967	-1.26105	2.3967	down			FALSE	immunoglobulin heavy variable 3-33 [Source:HGNC Symbol;Acc:5596] [ENST00000390615]			106815814	chr14	106815755	-	hs|14q32.33	KJ486916	chr14:106815814-106815755		Hs.703889
A_33_P3366082	-2.39584	-1.26053	2.39584	down	emopamil binding protein-like	EBPL	FALSE	Homo sapiens emopamil binding protein-like (EBPL), transcript variant 1, mRNA [NM_032565]	84650	GO:0005783|GO:0005789|GO:0016125|GO:0016021|GO:0047750	50237253	chr13	50237194	-	hs|13q14.2	NM_032565	chr13:50237253-50237194	NM_032565	Hs.433278
A_24_P818529	-2.39523	-1.26016	2.39523	down			FALSE	H.sapiens XG mRNA (clone PEP11). [Z48511]			2658223	chrY	2658164	+	hs|Yp11.31	Z48511	chrY:2658164-2658223
A_33_P3406927	-2.39435	-1.25963	2.39435	down	ADP-dependent glucokinase	ADPGK	FALSE	Homo sapiens ADP-dependent glucokinase (ADPGK), transcript variant 1, mRNA [NM_031284]	83440	GO:0016310|GO:0043843|GO:0005576|GO:0046872|GO:0006096	73045124	chr15	73045065	-	hs|15q24.1	NM_031284	chr15:73045124-73045065	NM_031284	Hs.654636
A_23_P99930	-2.39403	-1.25944	2.39403	down	TIMELESS interacting protein	TIPIN	FALSE	Homo sapiens TIMELESS interacting protein (TIPIN), transcript variant 1, mRNA [NM_017858]	54962	GO:0005515|GO:0000790|GO:0008284|GO:0005794|GO:0033262|GO:0048478|GO:0031573|GO:0005730|GO:0005634|GO:0043231|GO:0005737|GO:0007067|GO:0000076|GO:0009411	66629272	chr15	66629213	-	hs|15q22.31	NM_017858	chr15:66629272-66629213	NM_017858	Hs.744308
A_33_P3381117	-2.39328	-1.25899	2.39328	down	uncharacterized LOC100128563	LOC100128563	FALSE	Homo sapiens cDNA FLJ26034 fis, clone PNC08933. [AK129545]	100128563		240269754	chr2	240269695	-	hs|2q37.3	AK129545	chr2:240269754-240269695		Hs.689442
A_23_P154234	-2.39275	-1.25867	2.39275	down	polymerase (DNA-directed), epsilon 4, accessory subunit	POLE4	FALSE	Homo sapiens polymerase (DNA-directed), epsilon 4, accessory subunit (POLE4), mRNA [NM_019896]	56655	GO:0043565|GO:0005515|GO:0006261|GO:0008622|GO:0046982|GO:0043966|GO:0003887|GO:0005671|GO:0005634	75196568	chr2	75187247	+	hs|2p12	NM_019896	chr2:75187247-75196568	NM_019896	Hs.469060
A_23_P252145	-2.39246	-1.2585	2.39246	down	core 1 synthase, glycoprotein-N-acetylgalactosamine 3-beta-galactosyltransferase, 1	C1GALT1	FALSE	Homo sapiens core 1 synthase, glycoprotein-N-acetylgalactosamine 3-beta-galactosyltransferase, 1 (C1GALT1), mRNA [NM_020156]	56913	GO:0005515|GO:0000139|GO:0001822|GO:0016266|GO:0016263|GO:0016021|GO:0001525|GO:0044267|GO:0046872|GO:0030154|GO:0043687	7283624	chr7	7283565	+	hs|7p22.1	NM_020156	chr7:7283565-7283624	NM_020156	Hs.239666
A_33_P3420416	-2.38903	-1.25642	2.38903	down	lectin, galactoside-binding, soluble, 9	LGALS9	FALSE	Homo sapiens lectin, galactoside-binding, soluble, 9 (LGALS9), transcript variant 2, mRNA [NM_002308]	3965	GO:0007165|GO:0005737|GO:0005534|GO:0030246|GO:0004871|GO:0043123|GO:0070062	25967798	chr17	25967739	+	hs|17q11.2	NM_002308	chr17:25967739-25967798	NM_002308	Hs.81337
A_23_P132260	-2.38738	-1.25543	2.38738	down	pescadillo ribosomal biogenesis factor 1	PES1	FALSE	Homo sapiens pescadillo ribosomal biogenesis factor 1 (PES1), transcript variant 1, mRNA [NM_014303]	23481	GO:0005515|GO:0000463|GO:0000793|GO:0033365|GO:0008283|GO:0006364|GO:0005730|GO:0070545|GO:0007000|GO:0005737|GO:0051726|GO:0043021|GO:0005654|GO:0042273|GO:0030687|GO:0000466	30975843	chr22	30975784	-	hs|22q12.2	NM_014303	chr22:30975843-30975784	NM_014303	Hs.517543
A_23_P80040	-2.38674	-1.25504	2.38674	down	protein C receptor, endothelial	PROCR	FALSE	Homo sapiens protein C receptor, endothelial (PROCR), mRNA [NM_006404]	10544	GO:0005515|GO:0050819|GO:0006955|GO:0005813|GO:0019882|GO:0007596|GO:0005887|GO:0004872|GO:0070062	33765047	chr20	33764988	+	hs|20q11.22	NM_006404	chr20:33764988-33765047	NM_006404	Hs.647450
A_23_P310560	-2.38482	-1.25388	2.38482	down	nudix (nucleoside diphosphate linked moiety X)-type motif 16	NUDT16	FALSE	Homo sapiens nudix (nucleoside diphosphate linked moiety X)-type motif 16 (NUDT16), transcript variant 2, mRNA [NM_152395]	131870	GO:0008284|GO:0005634|GO:0044281|GO:0003729|GO:0035870|GO:0006382|GO:0042803|GO:0035863|GO:0005737|GO:0030515|GO:0006508|GO:0000287|GO:0030145|GO:0005730|GO:0055086|GO:0006402|GO:0005525|GO:0046709|GO:0050072|GO:0016077|GO:0090068|GO:0034656|GO:2000233|GO:0016311|GO:0008235|GO:0005654|GO:2000781|GO:0050897	131104924	chr3	131104865	+	hs|3q22.1	NM_152395	chr3:131104865-131104924	NM_152395	Hs.282050
A_23_P57379	-2.38326	-1.25294	2.38326	down	cell division cycle 45	CDC45	FALSE	Homo sapiens cell division cycle 45 (CDC45), transcript variant 2, mRNA [NM_003504]	8318	GO:0006260|GO:0005515|GO:0006271|GO:0005813|GO:0005737|GO:0000082|GO:0000083|GO:0006270|GO:0000076|GO:0005654|GO:0005634|GO:0000278	19508015	chr22	19506385	+	hs|22q11.21	NM_003504	chr22:19506385-19508015	NM_003504	Hs.474217
A_23_P75310	-2.37973	-1.2508	2.37973	down	Rho GTPase activating protein 22	ARHGAP22	FALSE	Homo sapiens Rho GTPase activating protein 22 (ARHGAP22), transcript variant 3, mRNA [NM_021226]	58504	GO:0043547|GO:0005515|GO:0051056|GO:0006355|GO:0007264|GO:0005634|GO:0001525|GO:0030154|GO:0006351|GO:0005829|GO:0005096	49654256	chr10	49654197	-	hs|10q11.22	NM_021226	chr10:49654256-49654197	NM_021226	Hs.655672
A_23_P124733	-2.37803	-1.24977	2.37803	down	coenzyme Q2 4-hydroxybenzoate polyprenyltransferase	COQ2	FALSE	Homo sapiens coenzyme Q2 4-hydroxybenzoate polyprenyltransferase (COQ2), mRNA [NM_015697]	27235	GO:0005739|GO:0008219|GO:0006744|GO:0047293|GO:0005743|GO:0044281|GO:0016021|GO:0008299|GO:0006071|GO:0002083	84193253	chr4	84191101	-	hs|4q21.23	NM_015697	chr4:84193253-84191101	NM_015697	Hs.729069
A_33_P3212989	-2.37731	-1.24933	2.37731	down	DLX6 antisense RNA 1	DLX6-AS1	FALSE	Homo sapiens DLX6 antisense RNA 1 (DLX6-AS1), long non-coding RNA [NR_015448]	285987		96597886	chr7	96597827	-	hs|7q21.3	NR_015448	chr7:96597886-96597827	NR_015448	Hs.34969
A_33_P3249439	-2.37668	-1.24895	2.37668	down	non-SMC condensin II complex, subunit H2	NCAPH2	FALSE	Homo sapiens non-SMC condensin II complex, subunit H2 (NCAPH2), transcript variant 3, mRNA [NM_001185011]	29781	GO:0005515|GO:0030261|GO:0005694|GO:0005654|GO:0000278	50961892	chr22	50961833	+	hs|22q13.33	NM_001185011	chr22:50961833-50961892	NM_001185011	Hs.730607
A_23_P97402	-2.37367	-1.24712	2.37367	down	calcium/calmodulin-dependent protein kinase IG	CAMK1G	FALSE	Homo sapiens calcium/calmodulin-dependent protein kinase IG (CAMK1G), mRNA [NM_020439]	57172	GO:0043005|GO:0005516|GO:0005886|GO:0000139|GO:0006468|GO:0004683|GO:0005524|GO:0005954	209787164	chr1	209787105	+	hs|1q32.2	NM_020439	chr1:209787105-209787164	NM_020439	Hs.199068
A_23_P168576	-2.37259	-1.24646	2.37259	down	POM121 and ZP3 fusion	POMZP3	FALSE	Homo sapiens POM121 and ZP3 fusion (POMZP3), transcript variant 2, mRNA [NM_152992]	22932	GO:0008150|GO:0003674|GO:0005575	76239323	chr7	76239291	-	hs|7q11.23	NM_152992	chr7:76239323-76239291	NM_152992	Hs.488877
A_23_P134085	-2.3698	-1.24477	2.3698	down	CNKSR family member 3	CNKSR3	FALSE	Homo sapiens CNKSR family member 3 (CNKSR3), mRNA [NM_173515]	154043	GO:0005737|GO:0016020|GO:0033137|GO:0010765|GO:0070373	154726608	chr6	154726549	-	hs|6q25.2	NM_173515	chr6:154726608-154726549	NM_173515	Hs.16064
A_33_P3369436	-2.36902	-1.24429	2.36902	down			FALSE	Homo sapiens, clone IMAGE:5221398, mRNA. [BC043570]			29969638	chr15	29969579	+	hs|15q13.1	TCONS_l2_00008512	chr15:29969579-29969638		Hs.525720
A_23_P82823	-2.36861	-1.24404	2.36861	down	PIN2/TERF1 interacting, telomerase inhibitor 1	PINX1	FALSE	Homo sapiens PIN2/TERF1 interacting, telomerase inhibitor 1 (PINX1), transcript variant 1, mRNA [NM_017884]	54984	GO:0005515|GO:0051974|GO:0000781|GO:0008285|GO:0010521|GO:0005730|GO:0005819|GO:0000228|GO:0051972|GO:0000777|GO:0000776|GO:0007080|GO:0007004|GO:0070034	10623329	chr8	10623270	-	hs|8p23.1	NM_017884	chr8:10623329-10623270	NM_017884	Hs.490991
A_33_P3372844	-2.36775	-1.24352	2.36775	down	DEAD (Asp-Glu-Ala-Asp) box helicase 56	DDX56	FALSE	Homo sapiens DEAD (Asp-Glu-Ala-Asp) box helicase 56 (DDX56), transcript variant 1, mRNA [NM_019082]	54606	GO:0004004|GO:0006200|GO:0006364|GO:0005730|GO:0005524	44605466	chr7	44605407	-	hs|7p13	NM_019082	chr7:44605466-44605407	NM_019082	Hs.654762
A_32_P108156	-2.36773	-1.24351	2.36773	down	MIR155 host gene (non-protein coding)	MIR155HG	FALSE	Homo sapiens MIR155 host gene (non-protein coding) (MIR155HG), long non-coding RNA [NR_001458]	114614		26946409	chr21	26946350	+	hs|21q21.3	NR_001458	chr21:26946350-26946409	NR_001458	Hs.697120
A_19_P00322609	-2.36706	-1.2431	2.36706	down			FALSE	Homo sapiens chromosome 15 sno-lncRNA5 snoRNA, complete sequence. [JX629744]			25345977	chr15	25345918	+	hs|15q11.2	JX629744	chr15:25345918-25345977		Hs.605154
A_33_P3337415	-2.36591	-1.24239	2.36591	down	guanine nucleotide binding protein (G protein), alpha activating activity polypeptide, olfactory type	GNAL	FALSE	Homo sapiens guanine nucleotide binding protein (G protein), alpha activating activity polypeptide, olfactory type (GNAL), transcript variant 1, mRNA [NM_182978]	2774	GO:0007608|GO:0001664|GO:0005886|GO:0005834|GO:0003924|GO:0007268|GO:0031683|GO:0005525|GO:0007193|GO:0046872|GO:0031234|GO:0007191|GO:0006184|GO:0007165|GO:0007190|GO:0001975|GO:0031000|GO:0004871|GO:0007189	11882421	chr18	11882362	+	hs|18p11.21	NM_182978	chr18:11882362-11882421	NM_182978	Hs.136295
A_33_P3362498	-2.36573	-1.24229	2.36573	down	ataxia telangiectasia and Rad3 related	ATR	FALSE	Homo sapiens ataxia telangiectasia and Rad3 related (ATR), mRNA [NM_001184]	545	GO:0005515|GO:0032407|GO:0032405|GO:0071480|GO:0034644|GO:0046777|GO:0018105|GO:0001741|GO:0005694|GO:0042493|GO:0043393|GO:0007275|GO:0005524|GO:0003677|GO:0006974|GO:0006260|GO:0007049|GO:0006281|GO:0004672|GO:0004674|GO:0016605|GO:0043517|GO:0005654|GO:0000077|GO:0008156|GO:0090399	142185226	chr3	142185167	-	hs|3q23	NM_001184	chr3:142185226-142185167	NM_001184	Hs.271791
A_33_P3386746	-2.36293	-1.24058	2.36293	down	MAM and LDL receptor class A domain containing 1	MALRD1	FALSE	Homo sapiens MAM and LDL receptor class A domain containing 1 (MALRD1), mRNA [NM_001142308]	340895	GO:0016021	19498601	chr10	19498542	+	hs|10p12.31	NM_001142308	chr10:19498542-19498601	NM_001142308
A_33_P3372332	-2.36048	-1.23908	2.36048	down	cytochrome b-245, alpha polypeptide	CYBA	FALSE	Homo sapiens cytochrome b-245, alpha polypeptide (CYBA), mRNA [NM_000101]	1535	GO:0045730|GO:0005515|GO:0002474|GO:0017124|GO:0030307|GO:0006801|GO:0071480|GO:0050665|GO:0046872|GO:0030425|GO:0005739|GO:0016324|GO:0006954|GO:0071230|GO:0016175|GO:0071356|GO:0043025|GO:0030670|GO:0031667|GO:0071333|GO:0030141|GO:0090382|GO:0070555|GO:0042554|GO:0005794|GO:0051701|GO:0046982|GO:0042493|GO:0042590|GO:0009055|GO:0014895|GO:0003106|GO:0071407|GO:0001938|GO:0045087|GO:0002479|GO:…	88713223	chr16	88713164	-	hs|16q24.3	NM_000101	chr16:88713223-88713164	NM_000101	Hs.513803
A_33_P3271395	-2.35663	-1.23672	2.35663	down	small nuclear ribonucleoprotein polypeptide N pseudogene	LOC100129534	FALSE	Homo sapiens small nuclear ribonucleoprotein polypeptide N pseudogene (LOC100129534), non-coding RNA [NR_024489]	100129534		2281912	chr1	2281853	-	hs|1p36.33	NR_024489	chr1:2281912-2281853	NR_024489	Hs.655313
A_24_P74371	-2.35483	-1.23562	2.35483	down	cathepsin A	CTSA	FALSE	Homo sapiens cathepsin A (CTSA), transcript variant 1, mRNA [NM_000308]	5476	GO:0006665|GO:0006687|GO:0005783|GO:0005730|GO:0005634|GO:0044281|GO:0043085|GO:0005764|GO:0006886|GO:0043231|GO:0004185|GO:0004180|GO:0006508|GO:0008047|GO:0070062|GO:0043202	44527300	chr20	44527241	+	hs|20q13.12	NM_000308	chr20:44527241-44527300	NM_000308	Hs.609336
A_33_P3456341	-2.35464	-1.2355	2.35464	down	La ribonucleoprotein domain family, member 4	LARP4	FALSE	Homo sapiens La ribonucleoprotein domain family, member 4 (LARP4), transcript variant 5, mRNA [NM_001170804]	113251	GO:0022604|GO:0007010	50855123	chr12	50855064	+	hs|12q13.12	NM_001170804	chr12:50855064-50855123	NM_001170804	Hs.26613
A_23_P22352	-2.35446	-1.2354	2.35446	down	FERM domain containing 4A	FRMD4A	FALSE	FERM domain containing 4A [Source:HGNC Symbol;Acc:25491] [ENST00000342409]	55691	GO:0090162|GO:0005737|GO:0005923|GO:0030674|GO:0005856	13735772	chr10	13735713	-	hs|10p13	AK001072	chr10:13735772-13735713		Hs.330463
A_23_P74088	-2.35351	-1.23481	2.35351	down	matrix metallopeptidase 23B	MMP23B	FALSE	Homo sapiens matrix metallopeptidase 23B (MMP23B), mRNA [NM_006983]	8510	GO:0005622|GO:0006508|GO:0005789|GO:0005578|GO:0008270|GO:0016021|GO:0004222|GO:0008237	1569846	chr1	1569668	+	hs|1p36.33	NM_006983	chr1:1569668-1569846	NM_006983	Hs.192316
A_23_P85682	-2.3517	-1.2337	2.3517	down	nuclear factor I/A	NFIA	FALSE	Homo sapiens nuclear factor I/A (NFIA), transcript variant 2, mRNA [NM_005595]	4774	GO:0006260|GO:0014070|GO:0006355|GO:0001077|GO:0003700|GO:0045944|GO:0005634|GO:0000978|GO:0019079|GO:0006351|GO:0008134	61921973	chr1	61921914	+	hs|1p31.3	NM_005595	chr1:61921914-61921973	NM_005595	Hs.744898
A_23_P36825	-2.34936	-1.23227	2.34936	down	G protein-coupled receptor, class C, group 5, member A	GPRC5A	FALSE	Homo sapiens G protein-coupled receptor, class C, group 5, member A (GPRC5A), mRNA [NM_003979]	9052	GO:0007165|GO:0007186|GO:0005886|GO:0005887|GO:0004930|GO:0030659|GO:0070062|GO:0043231	13065766	chr12	13065707	+	hs|12p13.1	NM_003979	chr12:13065707-13065766	NM_003979	Hs.631733
A_33_P3295358	-2.34897	-1.23203	2.34897	down	angiopoietin-like 4	ANGPTL4	FALSE	Homo sapiens angiopoietin-like 4 (ANGPTL4), transcript variant 1, mRNA [NM_139314]	51129	GO:0004857|GO:0005515|GO:0001666|GO:0043066|GO:0005578|GO:0070328|GO:0072562|GO:0005576|GO:0001525|GO:0044281|GO:0005615|GO:0030154|GO:0045766|GO:0051005|GO:0051260|GO:2000352|GO:0044255	8439256	chr19	8439197	+	hs|19p13.2	NM_139314	chr19:8439197-8439256	NM_139314	Hs.9613
A_23_P146294	-2.34848	-1.23173	2.34848	down	EF-hand calcium binding domain 1	EFCAB1	FALSE	Homo sapiens EF-hand calcium binding domain 1 (EFCAB1), transcript variant 1, mRNA [NM_024593]	79645	GO:0005509	49636139	chr8	49636080	-	hs|8q11.21	NM_024593	chr8:49636139-49636080	NM_024593	Hs.23245
A_23_P68087	-2.34842	-1.23169	2.34842	down	5-aminoimidazole-4-carboxamide ribonucleotide formyltransferase/IMP cyclohydrolase	ATIC	FALSE	Homo sapiens 5-aminoimidazole-4-carboxamide ribonucleotide formyltransferase/IMP cyclohydrolase (ATIC), mRNA [NM_004044]	471	GO:0009168|GO:0021987|GO:0003360|GO:0003937|GO:0031100|GO:0055086|GO:0021549|GO:0044281|GO:0042803|GO:0005829|GO:0005739|GO:0004643|GO:0046452|GO:0006139|GO:0010035|GO:0006144|GO:0046654|GO:0009116|GO:0070062|GO:0006189	216213936	chr2	216213877	+	hs|2q35	NM_004044	chr2:216213877-216213936	NM_004044	Hs.90280
A_33_P3220470	-2.34805	-1.23146	2.34805	down	SMAD family member 6	SMAD6	FALSE	Homo sapiens SMAD family member 6 (SMAD6), transcript variant 1, mRNA [NM_005585]	4091	GO:0005515|GO:0001657|GO:0043627|GO:0008285|GO:0003700|GO:0010991|GO:0030617|GO:0044212|GO:0005634|GO:0060394|GO:0046872|GO:0005829|GO:0030514|GO:0035556|GO:0070698|GO:0006955|GO:0005737|GO:0045444|GO:0007179|GO:0030512|GO:0031625|GO:0005667|GO:0043066|GO:0031589|GO:0070410|GO:0070411|GO:0070412|GO:0007352|GO:0030509|GO:0006351|GO:0043234|GO:0034713|GO:0003682|GO:0034616	67074322	chr15	67074263	+	hs|15q22.31	NM_005585	chr15:67074263-67074322	NM_005585	Hs.153863
A_23_P17190	-2.34642	-1.23046	2.34642	down	kelch-like family member 41	KLHL41	FALSE	Homo sapiens kelch-like family member 41 (KLHL41), mRNA [NM_006063]	10324	GO:0005515|GO:0016567|GO:2000291|GO:0031275|GO:0006941|GO:0035914|GO:0001726|GO:0031430|GO:0031143|GO:0045661|GO:0005737|GO:0030239|GO:0031463|GO:2001014|GO:0005856	170382179	chr2	170382120	+	hs|2q31.1	NM_006063	chr2:170382120-170382179	NM_006063	Hs.50550
A_23_P354208	-2.34574	-1.23004	2.34574	down	WD repeat domain 81	WDR81	FALSE	Homo sapiens WD repeat domain 81 (WDR81), transcript variant 2, mRNA [NM_152348]	124997	GO:0010923|GO:0008152|GO:0016772	1641773	chr17	1641714	+	hs|17p13.3	NM_152348	chr17:1641714-1641773	NM_152348	Hs.234572
A_33_P3220095	-2.34523	-1.22973	2.34523	down	zinc finger protein 341	ZNF341	FALSE	Homo sapiens zinc finger protein 341 (ZNF341), transcript variant 1, mRNA [NM_001282933]	84905	GO:0006355|GO:0005634|GO:0003677|GO:0046872|GO:0006351	32380074	chr20	32380015	+	hs|20q11.22	NM_001282933	chr20:32380015-32380074	NM_001282933	Hs.516989
A_23_P69179	-2.34275	-1.22821	2.34275	down	leprecan-like 1	LEPREL1	FALSE	Homo sapiens leprecan-like 1 (LEPREL1), transcript variant 1, mRNA [NM_018192]	55214	GO:0031418|GO:0008285|GO:0005794|GO:0005506|GO:0030198|GO:0019797|GO:0005783|GO:0032963|GO:0005788|GO:0019511|GO:0055114|GO:0005604	189674703	chr3	189674644	-	hs|3q28	NM_018192	chr3:189674703-189674644	NM_018192	Hs.374191
A_23_P55936	-2.34215	-1.22783	2.34215	down	Fc fragment of IgG, receptor, transporter, alpha	FCGRT	FALSE	Homo sapiens Fc fragment of IgG, receptor, transporter, alpha (FCGRT), transcript variant 2, mRNA [NM_004107]	2217	GO:0030881|GO:0006955|GO:0005886|GO:0019882|GO:0019864|GO:0002416|GO:0016021|GO:0019770|GO:0003823|GO:0038094	50029570	chr19	50029511	+	hs|19q13.33	NM_004107	chr19:50029511-50029570	NM_004107	Hs.111903
A_19_P00321756	-2.34208	-1.22779	2.34208	down	differentiation antagonizing non-protein coding RNA	DANCR	FALSE	differentiation antagonizing non-protein coding RNA [Source:HGNC Symbol;Acc:28964] [ENST00000444958]	57291		53586420	chr4	53586361	+	hs|4q12		chr4:53586361-53586420
A_19_P00318418	-2.33986	-1.22642	2.33986	down	thromboxane A synthase 1 (platelet)	TBXAS1	FALSE	Homo sapiens thromboxane A synthase 1 (platelet) (TBXAS1), transcript variant 5, mRNA [NM_001166254]	6916	GO:0019369|GO:0019371|GO:0006805|GO:0005506|GO:0044281|GO:0006690|GO:0004497|GO:0005789|GO:0016021|GO:0016705|GO:0004796|GO:0020037|GO:0055114	139487225	chr7	139487166	+	hs|7q34	NM_001166254	chr7:139487166-139487225	NM_001166254	Hs.520757
A_23_P218476	-2.33976	-1.22636	2.33976	down	B9 protein domain 2	B9D2	FALSE	Homo sapiens B9 protein domain 2 (B9D2), mRNA [NM_030578]	80776	GO:0005515|GO:0042384|GO:0005813|GO:0043015|GO:0016020|GO:0036038|GO:0005634|GO:0000278|GO:0036064|GO:0005829	41860457	chr19	41860398	-	hs|19q13.2	NM_030578	chr19:41860457-41860398	NM_030578	Hs.567596
A_33_P3210423	-2.33895	-1.22586	2.33895	down	mediator complex subunit 1	MED1	FALSE	Homo sapiens mediator complex subunit 1 (MED1), mRNA [NM_004774]	5469	GO:0005515|GO:0010839|GO:0010467|GO:0006367|GO:0033160|GO:0006702|GO:0000981|GO:0045618|GO:0032993|GO:0042809|GO:0045444|GO:0042789|GO:0006590|GO:0000785|GO:0044255|GO:0003712|GO:0003406|GO:0016922|GO:0001104|GO:0003713|GO:0030331|GO:0001892|GO:0001047|GO:0000122|GO:0000978|GO:0031490|GO:0001889|GO:0035855|GO:0007420|GO:0016592|GO:0005654|GO:0033148|GO:0008134|GO:0031100|GO:0035257|GO:0035357|GO:…	37571339	chr17	37571280	-	hs|17q12	NM_004774	chr17:37571339-37571280	NM_004774	Hs.643754
A_24_P87931	-2.33826	-1.22543	2.33826	down	apolipoprotein L, 1	APOL1	FALSE	Homo sapiens apolipoprotein L, 1 (APOL1), transcript variant 2, mRNA [NM_145343]	8542	GO:0005515|GO:0006821|GO:0072562|GO:0005576|GO:0031224|GO:0005254|GO:0005615|GO:0008289|GO:0034361|GO:0034364|GO:0045087|GO:0006869|GO:0019835|GO:0042157|GO:0031640|GO:0008203	36663149	chr22	36663090	+	hs|22q12.3	NM_145343	chr22:36663090-36663149	NM_145343	Hs.114309
A_23_P77430	-2.33599	-1.22403	2.33599	down	protein arginine methyltransferase 7	PRMT7	FALSE	Homo sapiens protein arginine methyltransferase 7 (PRMT7), transcript variant 1, mRNA [NM_019023]	54496	GO:0019918|GO:0019919|GO:0005886|GO:0005634|GO:0008469|GO:0030154|GO:0005829|GO:0042393|GO:0043046|GO:0006355|GO:0016571|GO:0005730|GO:0034969|GO:0035241|GO:0043393|GO:0018216|GO:0008757|GO:0016277|GO:0000387|GO:0006351|GO:0035243|GO:0035242|GO:0044020|GO:0043985|GO:0006349|GO:0043021	68391121	chr16	68391062	+	hs|16q22.1	NM_019023	chr16:68391062-68391121	NM_019023	Hs.653193
A_23_P212800	-2.33522	-1.22356	2.33522	down	fibroblast growth factor 5	FGF5	FALSE	Homo sapiens fibroblast growth factor 5 (FGF5), transcript variant 1, mRNA [NM_004464]	2250	GO:0008286|GO:0048011|GO:0008284|GO:0008283|GO:0023019|GO:0048015|GO:0007267|GO:0005104|GO:0005576|GO:0005615|GO:0007399|GO:0007173|GO:0008543|GO:0045087|GO:0010001|GO:0051781|GO:0008083|GO:0038095	81207865	chr4	81207806	+	hs|4q21.21	NM_004464	chr4:81207806-81207865	NM_004464	Hs.37055
A_33_P3813818	-2.33468	-1.22322	2.33468	down			FALSE	Homo sapiens BPA-1 mRNA for brain peptide A1, complete cds. [AB088847]			65765425	chr1	65765366	+	hs|1p31.3	AB088847	chr1:65765366-65765425
A_23_P64860	-2.33285	-1.22209	2.33285	down	selectin P ligand	SELPLG	FALSE	Homo sapiens selectin P ligand (SELPLG), transcript variant 2, mRNA [NM_003006]	6404	GO:0005515|GO:0016020|GO:0005886|GO:0007596|GO:0005887|GO:0005102|GO:0071354|GO:0016021|GO:0050900|GO:0007155|GO:0050901|GO:0050902	109016450	chr12	109016391	-	hs|12q24.11	NM_003006	chr12:109016450-109016391	NM_003006	Hs.591014
A_33_P3423820	-2.33076	-1.2208	2.33076	down	zinc finger CCCH-type containing 3	ZC3H3	FALSE	Homo sapiens zinc finger CCCH-type containing 3 (ZC3H3), mRNA [NM_015117]	23144	GO:0006378|GO:0003674|GO:0016973|GO:0005634|GO:0010793|GO:0046872	144519885	chr8	144519826	-	hs|8q24.3	NM_015117	chr8:144519885-144519826	NM_015117	Hs.521915
A_33_P3270489	-2.33074	-1.22079	2.33074	down	coiled-coil domain containing 170	CCDC170	FALSE	Homo sapiens coiled-coil domain containing 170 (CCDC170), mRNA [NM_025059]	80129		151942156	chr6	151942097	+	hs|6q25.1	NM_025059	chr6:151942097-151942156	NM_025059	Hs.660044
A_23_P123393	-2.32864	-1.21949	2.32864	down	potassium voltage-gated channel, KQT-like subfamily, member 3	KCNQ3	FALSE	Homo sapiens potassium voltage-gated channel, KQT-like subfamily, member 3 (KCNQ3), transcript variant 1, mRNA [NM_004519]	3786	GO:0005251|GO:0005886|GO:0005267|GO:0007268|GO:0043194|GO:0060081|GO:0033268|GO:0007411|GO:0005249|GO:0008076|GO:0034765|GO:0006813|GO:0071805	133141528	chr8	133141469	-	hs|8q24.22	NM_004519	chr8:133141528-133141469	NM_004519	Hs.374023
A_23_P128246	-2.32551	-1.21755	2.32551	down	FIC domain containing	FICD	FALSE	Homo sapiens FIC domain containing (FICD), mRNA [NM_007076]	11153	GO:0034259|GO:0018117|GO:0016021|GO:0005524|GO:0070733	108913127	chr12	108913068	+	hs|12q23.3	NM_007076	chr12:108913068-108913127	NM_007076	Hs.661891
A_23_P78782	-2.32336	-1.21621	2.32336	down	carbonic anhydrase XI	CA11	FALSE	Homo sapiens carbonic anhydrase XI (CA11), mRNA [NM_001217]	770	GO:0016323|GO:0005576|GO:0004089	49142844	chr19	49142696	-	hs|19q13.33	NM_001217	chr19:49142844-49142696	NM_001217	Hs.428446
A_19_P00319036	-2.3223	-1.21556	2.3223	down			FALSE	Homo sapiens cDNA FLJ34029 fis, clone FCBBF2003636. [AK091348]			118588528	chr10	118588469	-	hs|10q25.3	AK091348	chr10:118588528-118588469		Hs.657012
A_23_P77731	-2.32007	-1.21417	2.32007	down	crystallin, mu	CRYM	FALSE	Homo sapiens crystallin, mu (CRYM), transcript variant 1, mRNA [NM_001888]	1428	GO:0050661|GO:0003714|GO:0007605|GO:0070327|GO:0005634|GO:0000122|GO:0070324|GO:0042803|GO:0005739|GO:0047127|GO:0042403|GO:0005737|GO:0055114|GO:0070062	21270022	chr16	21269963	-	hs|16p12.2	NM_001888	chr16:21270022-21269963	NM_001888	Hs.924
A_33_P3396389	-2.31987	-1.21404	2.31987	down	interleukin 1 receptor, type I	IL1R1	FALSE	Homo sapiens interleukin 1 receptor, type I (IL1R1), transcript variant 1, mRNA [NM_000877]	3554	GO:0005515|GO:0005886|GO:0009986|GO:0050727|GO:0005576|GO:0002020|GO:0005161|GO:0004909|GO:0006955|GO:0016020|GO:0005887|GO:0004908|GO:0004871|GO:0070555|GO:0070498|GO:0007166|GO:0004888	102792105	chr2	102792046	+	hs|2q12.1	NM_000877	chr2:102792046-102792105	NM_000877	Hs.701982
A_33_P3302125	-2.31849	-1.21319	2.31849	down	late cornified envelope 2A	LCE2A	FALSE	Homo sapiens late cornified envelope 2A (LCE2A), mRNA [NM_178428]	353139	GO:0031424	152671918	chr1	152671859	+	hs|1q21.3	NM_178428	chr1:152671859-152671918	NM_178428	Hs.334054
A_19_P00329499	-2.31818	-1.213	2.31818	down			FALSE				51545881	chr13	51545822	+	hs|13q14.3		chr13:051545822-051545881
A_23_P117928	-2.31766	-1.21267	2.31766	down	bromo adjacent homology domain containing 1	BAHD1	FALSE	Homo sapiens bromo adjacent homology domain containing 1 (BAHD1), mRNA [NM_014952]	22893	GO:0005515|GO:0031507|GO:0005694|GO:0003682|GO:0045892|GO:0006351|GO:0005677	40760190	chr15	40760131	+	hs|15q15.1	NM_014952	chr15:40760131-40760190	NM_014952	Hs.22109
A_23_P38154	-2.31544	-1.21129	2.31544	down	ferredoxin reductase	FDXR	FALSE	Homo sapiens ferredoxin reductase (FDXR), transcript variant 2, mRNA [NM_004110]	2232	GO:0005515|GO:0006694|GO:0005743|GO:0006091|GO:0044281|GO:0070402|GO:0005739|GO:0070995|GO:0004324|GO:0005759|GO:0015039|GO:0008203|GO:0055114	72858709	chr17	72858650	-	hs|17q25.1	NM_004110	chr17:72858709-72858650	NM_004110	Hs.69745
A_33_P3265606	-2.31408	-1.21044	2.31408	down	glutamate-cysteine ligase, modifier subunit	GCLM	FALSE	Homo sapiens glutamate-cysteine ligase, modifier subunit (GCLM), mRNA [NM_002061]	2730	GO:2001237|GO:0006805|GO:0046982|GO:0006536|GO:0042493|GO:0006534|GO:0051409|GO:0044281|GO:0005829|GO:0034641|GO:0043524|GO:0035226|GO:0051900|GO:0050880|GO:0000096|GO:0008637|GO:0004357|GO:0035229|GO:0006750|GO:0017109|GO:0006979	94352869	chr1	94352810	-	hs|1p22.1	NM_002061	chr1:94352869-94352810	NM_002061	Hs.315562
A_24_P156501	-2.31375	-1.21023	2.31375	down	early B-cell factor 1	EBF1	FALSE	Homo sapiens early B-cell factor 1 (EBF1), transcript variant 2, mRNA [NM_024007]	1879	GO:0003700|GO:0046983|GO:0007275|GO:0005634|GO:0045893|GO:0003677|GO:0046872|GO:0006351	158126074	chr5	158126015	-	hs|5q33.3	NM_024007	chr5:158126074-158126015	NM_024007	Hs.573143
A_24_P218979	-2.31112	-1.20859	2.31112	down	cell division cycle associated 3	CDCA3	FALSE	Homo sapiens cell division cycle associated 3 (CDCA3), mRNA [NM_031299]	83461	GO:0008150|GO:0003674|GO:0007067|GO:0016567|GO:0005575|GO:0005829	6958498	chr12	6958315	-	hs|12p13.31	NM_031299	chr12:6958498-6958315	NM_031299	Hs.524216
A_33_P3408953	-2.31084	-1.20842	2.31084	down	gamma-glutamyltransferase light chain 2	GGTLC2	FALSE	Homo sapiens gamma-glutamyltransferase light chain 2 (GGTLC2), transcript variant 3, mRNA [NM_001282879]	91227	GO:0019370|GO:0003840|GO:0006749|GO:0031362	22990155	chr22	22990096	+	hs|22q11.22	NM_001282879	chr22:22990096-22990155	NM_001282879	Hs.632765
A_23_P169978	-2.30923	-1.20741	2.30923	down	zinc finger protein 608	ZNF608	FALSE	Homo sapiens zinc finger protein 608 (ZNF608), mRNA [NM_020747]	57507	GO:0046872	123973545	chr5	123973486	-	hs|5q23.2	NM_020747	chr5:123973545-123973486	NM_020747	Hs.266616
A_23_P121326	-2.30876	-1.20712	2.30876	down	cytochrome b561 family, member D2	CYB561D2	FALSE	Homo sapiens cytochrome b561 family, member D2 (CYB561D2), transcript variant 1, mRNA [NM_007022]	11068	GO:0016021|GO:0046872|GO:0055114	50391297	chr3	50391238	+	hs|3p21.31	NM_007022	chr3:50391238-50391297	NM_007022	Hs.149443
A_33_P3599591	-2.30785	-1.20655	2.30785	down	pregnancy-associated plasma protein A, pappalysin 1	PAPPA	FALSE	Homo sapiens pregnancy-associated plasma protein A, pappalysin 1 (PAPPA), mRNA [NM_002581]	5069	GO:0007565|GO:0016020|GO:0004175|GO:0006508|GO:0051384|GO:0008270|GO:0005576|GO:0044267|GO:0005615|GO:0032354|GO:0030154|GO:0008237	119164066	chr9	119164007	+	hs|9q33.1	NM_002581	chr9:119164007-119164066	NM_002581	Hs.643599
A_23_P166775	-2.30693	-1.20597	2.30693	down	interleukin 17 receptor C	IL17RC	FALSE	Homo sapiens interleukin 17 receptor C (IL17RC), transcript variant 2, mRNA [NM_153461]	84818	GO:1900017|GO:0030368|GO:0005886|GO:0019221|GO:0016021	9974791	chr3	9974732	+	hs|3p25.3	NM_153461	chr3:9974732-9974791	NM_153461	Hs.129959
A_32_P86118	-2.30631	-1.20558	2.30631	down	peptidase M20 domain containing 2	PM20D2	FALSE	Homo sapiens peptidase M20 domain containing 2 (PM20D2), mRNA [NM_001010853]	135293	GO:0016787|GO:0008152|GO:0005730|GO:0005634|GO:0070062	89874277	chr6	89874218	+	hs|6q15	NM_001010853	chr6:89874218-89874277	NM_001010853	Hs.356247
A_32_P75264	-2.30566	-1.20518	2.30566	down	transmembrane protein 26	TMEM26	FALSE	Homo sapiens transmembrane protein 26 (TMEM26), mRNA [NM_178505]	219623	GO:0016021	63166727	chr10	63166668	-	hs|10q21.2	NM_178505	chr10:63166727-63166668	NM_178505	Hs.623955
A_23_P155301	-2.30556	-1.20512	2.30556	down	NIMA-related kinase 11	NEK11	FALSE	Homo sapiens NIMA-related kinase 11 (NEK11), transcript variant 2, mRNA [NM_145910]	79858	GO:0035556|GO:0005515|GO:0004674|GO:0031573|GO:0031572|GO:0005730|GO:0006468|GO:0005634|GO:0005524|GO:0046872	130889720	chr3	130889661	+	hs|3q22.1	NM_145910	chr3:130889661-130889720	NM_145910	Hs.657336
A_23_P203900	-2.30332	-1.20372	2.30332	down	scavenger receptor class B, member 1	SCARB1	FALSE	Homo sapiens scavenger receptor class B, member 1 (SCARB1), transcript variant 1, mRNA [NM_005505]	949	GO:0005515|GO:0005215|GO:0006707|GO:0006702|GO:0010899|GO:0031528|GO:0005765|GO:0042803|GO:0015914|GO:0032497|GO:0031663|GO:0070062|GO:0042632|GO:0033344|GO:0009986|GO:0043691|GO:0030169|GO:0006898|GO:0010595|GO:0070506|GO:0070508|GO:0043534|GO:0005887|GO:0051000|GO:0034375|GO:0042060|GO:0001786|GO:0042157|GO:0008035|GO:0005886|GO:0001875|GO:0070328|GO:0044281|GO:0050764|GO:0005545|GO:0034384|GO:…	125262284	chr12	125262225	-	hs|12q24.31	NM_005505	chr12:125262284-125262225	NM_005505	Hs.731377
A_33_P3331511	-2.30261	-1.20327	2.30261	down	long intergenic non-protein coding RNA 173	LINC00173	FALSE	Homo sapiens long intergenic non-protein coding RNA 173 (LINC00173), transcript variant 1, long non-coding RNA [NR_027345]	100287569		116973150	chr12	116973091	+	hs|12q24.22		chr12:116973091-116973150	NR_027345	Hs.441601
A_24_P375819	-2.30239	-1.20313	2.30239	down	5-hydroxytryptamine (serotonin) receptor 7 pseudogene 1	HTR7P1	FALSE	Homo sapiens 5-hydroxytryptamine (serotonin) receptor 7 pseudogene 1 (HTR7P1), non-coding RNA [NR_002774]	93164		13155106	chr12	13155047	+	hs|12p13.1	NR_002774	chr12:13155047-13155106	NR_002774	Hs.593282
A_23_P29248	-2.30217	-1.20299	2.30217	down	thiosulfate sulfurtransferase (rhodanese)	TST	FALSE	Homo sapiens thiosulfate sulfurtransferase (rhodanese) (TST), transcript variant 1, mRNA [NM_003312]	7263	GO:0005743|GO:0044281|GO:0005615|GO:0035928|GO:0005739|GO:0034641|GO:0000096|GO:0000098|GO:0005759|GO:0009440|GO:0030855|GO:0051029|GO:0004792|GO:0008097|GO:0070221|GO:0070062	37407072	chr22	37407013	-	hs|22q12.3	NM_003312	chr22:37407072-37407013	NM_003312	Hs.474783
A_23_P52986	-2.30195	-1.20285	2.30195	down	von Willebrand factor C and EGF domains	VWCE	FALSE	Homo sapiens von Willebrand factor C and EGF domains (VWCE), mRNA [NM_152718]	220001	GO:0005509|GO:0005576	61025840	chr11	61025781	-	hs|11q12.2	NM_152718	chr11:61025840-61025781	NM_152718	Hs.60640
A_23_P256504	-2.30189	-1.20282	2.30189	down	alpha-1-microglobulin/bikunin precursor	AMBP	FALSE	Homo sapiens alpha-1-microglobulin/bikunin precursor (AMBP), mRNA [NM_001633]	259	GO:0005515|GO:0007565|GO:0005886|GO:0009986|GO:0004867|GO:0036094|GO:0072562|GO:0005576|GO:0005615|GO:0042803|GO:0046904|GO:0043231|GO:0010951|GO:0030163|GO:0018298|GO:0046329|GO:0019862|GO:0050777|GO:0019855|GO:0016032|GO:0042167|GO:0007155|GO:0070062|GO:0020037	116823757	chr9	116823373	-	hs|9q32	NM_001633	chr9:116823757-116823373	NM_001633	Hs.436911
A_33_P3365193	-2.30086	-1.20217	2.30086	down	amylase, alpha 1C (salivary)	AMY1C	FALSE	Homo sapiens amylase, alpha 1C (salivary) (AMY1C), mRNA [NM_001008219]	278	GO:0005515|GO:0005975|GO:0007586|GO:0005615|GO:0004556|GO:0046872|GO:0070062	104203063	chr1	104203004	+	hs|1p21.1	NM_001008219	chr1:104203004-104203063	NM_001008219	Hs.655232
A_23_P6252	-2.3007	-1.20207	2.3007	down	Down syndrome critical region gene 8	DSCR8	FALSE	Homo sapiens Down syndrome critical region gene 8 (DSCR8), transcript variant 4, long non-coding RNA [NR_026838]	84677	GO:0008150|GO:0003674|GO:0005575	39528468	chr21	39528409	+	hs|21q22.13	NR_026838	chr21:39528409-39528468	NR_026838	Hs.733345
A_23_P159839	-2.30013	-1.20171	2.30013	down	C1GALT1-specific chaperone 1	C1GALT1C1	FALSE	Homo sapiens C1GALT1-specific chaperone 1 (C1GALT1C1), transcript variant 1, mRNA [NM_152692]	29071	GO:0005515|GO:0004653|GO:0000139|GO:0016266|GO:0016021|GO:0044267|GO:0070062|GO:0043687	119760176	chrX	119760117	-	hs|Xq24	NM_152692	chrX:119760176-119760117	NM_152692	Hs.643920
A_32_P82189	-2.30012	-1.20171	2.30012	down	family with sequence similarity 161, member A	FAM161A	FALSE	Homo sapiens family with sequence similarity 161, member A (FAM161A), transcript variant 2, mRNA [NM_032180]	84140	GO:0005515|GO:0042384|GO:0005813|GO:0005737|GO:0032391|GO:0007601|GO:0050896|GO:0036064	62066799	chr2	62066740	-	hs|2p15	NM_032180	chr2:62066799-62066740	NM_032180	Hs.440466
A_23_P146187	-2.29925	-1.20116	2.29925	down	RRS1 ribosome biogenesis regulator homolog (S. cerevisiae)	RRS1	FALSE	Homo sapiens RRS1 ribosome biogenesis regulator homolog (S. cerevisiae) (RRS1), mRNA [NM_015169]	23212	GO:0000794|GO:0005783|GO:0042254|GO:0005730|GO:0005634|GO:0007080	67342751	chr8	67342692	+	hs|8q13.1	NM_015169	chr8:67342692-67342751	NM_015169	Hs.71827
A_33_P3335984	-2.29878	-1.20087	2.29878	down	TAPT1 antisense RNA 1 (head to head)	TAPT1-AS1	FALSE	Homo sapiens hypothetical FLJ39653, mRNA (cDNA clone IMAGE:40146949). [BC132927]	202020		16229179	chr4	16229120	+	hs|4p15.32	BC132927	chr4:16229120-16229179
A_33_P3386723	-2.29873	-1.20084	2.29873	down			FALSE				85998237	chr6	85998178	+	hs|6q14.3		chr6:085998178-085998237
A_23_P87635	-2.29835	-1.2006	2.29835	down	RBPJ interacting and tubulin associated 1	RITA1	FALSE	Homo sapiens RBPJ interacting and tubulin associated 1 (RITA1), transcript variant 1, mRNA [NM_032848]	84934	GO:0005515|GO:0045746|GO:0005813|GO:0005737|GO:0015631|GO:0007219|GO:0005634|GO:0000122|GO:0051168|GO:0022008	113629795	chr12	113629736	+	hs|12q24.13	NM_032848	chr12:113629736-113629795	NM_032848	Hs.524762
A_32_P192692	-2.29648	-1.19943	2.29648	down	potassium large conductance calcium-activated channel, subfamily M, alpha member 1	KCNMA1	FALSE	Homo sapiens potassium large conductance calcium-activated channel, subfamily M, alpha member 1 (KCNMA1), transcript variant 1, mRNA [NM_001014797]	3778	GO:0005515|GO:0045475|GO:0005886|GO:0005783|GO:0007605|GO:0007268|GO:0046872|GO:0019228|GO:0060087|GO:0016324|GO:0045211|GO:0043195|GO:0005249|GO:0008076|GO:0042391|GO:0050885|GO:0007628|GO:0051260|GO:0048469|GO:0034765|GO:0006813|GO:0071805|GO:0034465|GO:0070062|GO:0060072|GO:0046541|GO:0001666|GO:0043065|GO:0030007|GO:0042491|GO:0006970|GO:0003779|GO:0060073|GO:0060083|GO:0045794|GO:0060082|GO:…	78629523	chr10	78629464	-	hs|10q22.3	NM_001014797	chr10:78629523-78629464	NM_001014797	Hs.144795
A_23_P408249	-2.29598	-1.19911	2.29598	down	phosphoenolpyruvate carboxykinase 1 (soluble)	PCK1	FALSE	Homo sapiens phosphoenolpyruvate carboxykinase 1 (soluble) (PCK1), mRNA [NM_002591]	5105	GO:0031406|GO:0032868|GO:0014823|GO:0030145|GO:0000287|GO:0017144|GO:0005975|GO:0006094|GO:0006107|GO:0044281|GO:0042593|GO:0005525|GO:0005829|GO:0046327|GO:0005737|GO:0004613|GO:0006006|GO:0006475|GO:0019003|GO:0070062	56141089	chr20	56141030	+	hs|20q13.31	NM_002591	chr20:56141030-56141089	NM_002591	Hs.1872
A_23_P218597	-2.29573	-1.19895	2.29573	down	neuronal PAS domain protein 2	NPAS2	FALSE	Homo sapiens neuronal PAS domain protein 2 (NPAS2), mRNA [NM_002518]	4862	GO:0005515|GO:0045475|GO:0003700|GO:2001020|GO:0051879|GO:0005634|GO:0044281|GO:0045739|GO:0046872|GO:0005829|GO:0042745|GO:0045944|GO:0046983|GO:0060548|GO:0004871|GO:0044255|GO:0005667|GO:0001047|GO:0007417|GO:0003677|GO:0032922|GO:0006974|GO:0006351|GO:0007165|GO:0051775|GO:0045893	101612258	chr2	101612199	+	hs|2q11.2	NM_002518	chr2:101612199-101612258	NM_002518	Hs.156832
A_19_P00316075	-2.29559	-1.19887	2.29559	down			FALSE	Q30VC0_DESDG (Q30VC0) Flagellar biosynthetic protein FliP, partial (8%) [THC2498220]			53579332	chr4	53579273	+	hs|4q12		chr4:053579273-053579332
A_33_P3316800	-2.29403	-1.19789	2.29403	down	aryl hydrocarbon receptor	AHR	FALSE	Homo sapiens aryl hydrocarbon receptor (AHR), mRNA [NM_001621]	196	GO:0005515|GO:0010468|GO:0003700|GO:0006805|GO:0044212|GO:0006366|GO:0045899|GO:0003705|GO:0051879|GO:0005634|GO:0005737|GO:0046983|GO:0030850|GO:0004879|GO:0004871|GO:0009410|GO:0005667|GO:0006355|GO:0001568|GO:0046982|GO:0006357|GO:0005730|GO:0006950|GO:0006915|GO:0030888|GO:0000122|GO:0003677|GO:0035326|GO:0043565|GO:0007049|GO:0034752|GO:0030522|GO:0008134	17382822	chr7	17382763	+	hs|7p21.1	NM_001621	chr7:17382763-17382822	NM_001621	Hs.171189
A_33_P3389060	-2.29199	-1.1966	2.29199	down	CDK5 regulatory subunit associated protein 2	CDK5RAP2	FALSE	Homo sapiens CDK5 regulatory subunit associated protein 2 (CDK5RAP2), transcript variant 1, mRNA [NM_018249]	55755	GO:0005515|GO:0008017|GO:0005516|GO:0048471|GO:0030054|GO:0044212|GO:0001578|GO:0000132|GO:0005829|GO:0005737|GO:0007059|GO:0015631|GO:0000086|GO:0005856|GO:0000242|GO:0070062|GO:0022008|GO:0090231|GO:0005813|GO:0005794|GO:0019901|GO:0005874|GO:0000226|GO:0046600|GO:0051297|GO:0000922|GO:0045665|GO:0007420|GO:0045664|GO:0045893|GO:0000278	123165144	chr9	123165085	-	hs|9q33.2	NM_018249	chr9:123165144-123165085	NM_018249	Hs.269560
A_19_P00322269	-2.29114	-1.19607	2.29114	down			FALSE				47055045	chr2	47054986	+	hs|2p21		chr2:047054986-047055045
A_32_P69368	-2.29034	-1.19556	2.29034	down	inhibitor of DNA binding 2, dominant negative helix-loop-helix protein	ID2	FALSE	Homo sapiens inhibitor of DNA binding 2, dominant negative helix-loop-helix protein (ID2), mRNA [NM_002166]	3398	GO:0001656|GO:0005515|GO:0043353|GO:2000045|GO:0071158|GO:0048541|GO:0009649|GO:0046983|GO:0000785|GO:0071285|GO:0005813|GO:2000178|GO:0007275|GO:0000122|GO:0045651|GO:0045787|GO:0071931|GO:0044325|GO:0043392|GO:0019216|GO:0043234|GO:0033598|GO:0045648|GO:0045600|GO:0045893|GO:0045892|GO:0090398|GO:0045578|GO:0003166|GO:0005634|GO:0045777|GO:0043433|GO:0005829|GO:0005737|GO:0021772|GO:0001779|GO:…	8824341	chr2	8824282	+	hs|2p25.1	NM_002166	chr2:8824282-8824341	NM_002166	Hs.180919
A_23_P29723	-2.28937	-1.19495	2.28937	down	shugoshin-like 1 (S. pombe)	SGOL1	FALSE	Homo sapiens shugoshin-like 1 (S. pombe) (SGOL1), transcript variant A2, mRNA [NM_001012410]	151648	GO:0005515|GO:0000780|GO:0010457|GO:0005813|GO:0030892|GO:0005730|GO:0005634|GO:0005829|GO:0007067|GO:0000922|GO:0005737|GO:0007059|GO:0045132|GO:0000777|GO:0000776|GO:0000779|GO:0019900|GO:0008608|GO:0000278|GO:0000775	20202365	chr3	20202306	-	hs|3p24.3	NM_001012410	chr3:20202365-20202306	NM_001012410	Hs.105153
A_23_P330578	-2.28922	-1.19486	2.28922	down	leucine rich repeat containing 39	LRRC39	FALSE	Homo sapiens leucine rich repeat containing 39 (LRRC39), transcript variant 3, mRNA [NM_144620]	127495		100614593	chr1	100614534	-	hs|1p21.2	NM_144620	chr1:100614593-100614534	NM_144620	Hs.44277
A_33_P3241984	-2.28812	-1.19416	2.28812	down	protein tyrosine phosphatase, non-receptor type 22 (lymphoid)	PTPN22	FALSE	Homo sapiens protein tyrosine phosphatase, non-receptor type 22 (lymphoid) (PTPN22), transcript variant 1, mRNA [NM_015967]	26191	GO:0005515|GO:0050855|GO:0048471|GO:0017124|GO:0050868|GO:0005634|GO:0050860|GO:0032817|GO:0035335|GO:0005737|GO:0006470|GO:0030217|GO:0045088|GO:0009898|GO:0019900|GO:0004725|GO:0035644	114356520	chr1	114356461	-	hs|1p13.2	NM_015967	chr1:114356520-114356461	NM_015967	Hs.535276
A_23_P35467	-2.28675	-1.1933	2.28675	down	CDGSH iron sulfur domain 1	CISD1	FALSE	Homo sapiens CDGSH iron sulfur domain 1 (CISD1), mRNA [NM_018464]	55847	GO:0005739|GO:0051537|GO:0005741|GO:0016021|GO:0043457|GO:0046872|GO:0070062	60047498	chr10	60047439	+	hs|10q21.1	NM_018464	chr10:60047439-60047498	NM_018464	Hs.370102
A_23_P93772	-2.28626	-1.19299	2.28626	down	homeobox A5	HOXA5	FALSE	Homo sapiens homeobox A5 (HOXA5), mRNA [NM_019102]	3202	GO:0005515|GO:0003700|GO:0005634|GO:0048704|GO:0030878|GO:0010870|GO:0009952|GO:0060574|GO:0003016|GO:0060644|GO:0035264|GO:0045639|GO:0045944|GO:0060435|GO:0043065|GO:0048286|GO:0060764|GO:0003677|GO:0006351|GO:0033599|GO:0043565|GO:0060441|GO:0060638|GO:0016477|GO:0045647|GO:0016525|GO:0060484|GO:0060535|GO:0060749|GO:0060480	27181606	chr7	27181547	-	hs|7p15.2	NM_019102	chr7:27181606-27181547	NM_019102	Hs.655218
A_33_P3262012	-2.28618	-1.19294	2.28618	down			FALSE	AY358403 RASL651 {Homo sapiens} (exp=-1; wgp=0; cg=0), partial (38%) [THC2603411]			220406302	chr2	220406243	-	hs|2q35		chr2:220406302-220406243
A_23_P78543	-2.28612	-1.1929	2.28612	down	adaptor-related protein complex 1, mu 2 subunit	AP1M2	FALSE	Homo sapiens adaptor-related protein complex 1, mu 2 subunit (AP1M2), mRNA [NM_005498]	10053	GO:0030131|GO:0006892|GO:0006605|GO:0005765|GO:0032588|GO:0006903|GO:0005829|GO:0050690|GO:0019886|GO:0030665|GO:0000139|GO:0061024|GO:0016032|GO:0030659	10685629	chr19	10685159	-	hs|19p13.2	NM_005498	chr19:10685629-10685159	NM_005498	Hs.18894
A_23_P88893	-2.28518	-1.19231	2.28518	down	differentially expressed in FDCP 8 homolog (mouse)	DEF8	FALSE	Homo sapiens differentially expressed in FDCP 8 homolog (mouse) (DEF8), transcript variant 2, mRNA [NM_017702]	54849	GO:0035556|GO:0008270	90025656	chr16	90025597	+	hs|16q24.3	NM_017702	chr16:90025597-90025656	NM_017702	Hs.62771
A_33_P3217119	-2.28364	-1.19133	2.28364	down	organic solute carrier partner 1	OSCP1	FALSE	Homo sapiens organic solute carrier partner 1 (OSCP1), transcript variant 2, mRNA [NM_206837]	127700	GO:0009925|GO:0006810	36893980	chr1	36893921	-	hs|1p34.3	NM_206837	chr1:36893980-36893921	NM_206837	Hs.202207
A_23_P161918	-2.28304	-1.19096	2.28304	down	coiled-coil domain containing 86	CCDC86	FALSE	Homo sapiens coiled-coil domain containing 86 (CCDC86), mRNA [NM_024098]	79080	GO:0005515|GO:0005730|GO:0016032|GO:0005634	60618530	chr11	60618471	+	hs|11q12.2	NM_024098	chr11:60618471-60618530	NM_024098	Hs.4253
A_23_P163195	-2.28061	-1.18942	2.28061	down	leucine rich repeat and fibronectin type III domain containing 5	LRFN5	FALSE	Homo sapiens leucine rich repeat and fibronectin type III domain containing 5 (LRFN5), mRNA [NM_152447]	145581	GO:0016021	42360944	chr14	42360885	+	hs|14q21.1	NM_152447	chr14:42360885-42360944	NM_152447	Hs.136893
A_33_P3268649	-2.28023	-1.18918	2.28023	down	solute carrier family 2 (facilitated glucose transporter), member 11	SLC2A11	FALSE	Homo sapiens solute carrier family 2 (facilitated glucose transporter), member 11 (SLC2A11), transcript variant 4, mRNA [NM_001282864]	66035	GO:0005886|GO:0022891|GO:0008643|GO:0016021|GO:0055085	24217427	chr22	24217368	+	hs|22q11.23	NM_001282864	chr22:24217368-24217427	NM_001282864	Hs.743282
A_23_P57306	-2.28013	-1.18912	2.28013	down	chromatin assembly factor 1, subunit B (p60)	CHAF1B	FALSE	Homo sapiens chromatin assembly factor 1, subunit B (p60) (CHAF1B), mRNA [NM_005441]	8208	GO:0000790|GO:0006355|GO:0033186|GO:0005730|GO:0006335|GO:0005634|GO:0006351|GO:0005829|GO:0006260|GO:0043234|GO:0042393|GO:0007049|GO:0005737|GO:0006281|GO:0006461|GO:0031497|GO:0003682|GO:0005654|GO:0051082	37789017	chr21	37788958	+	hs|21q22.12	NM_005441	chr21:37788958-37789017	NM_005441	Hs.75238
A_33_P3251984	-2.27997	-1.18901	2.27997	down	MAS-related GPR, member F	MRGPRF	FALSE	Homo sapiens MAS-related GPR, member F (MRGPRF), transcript variant 1, mRNA [NM_001098515]	116535	GO:0007186|GO:0005886|GO:0004930|GO:0016021|GO:0070062	68773595	chr11	68773536	-	hs|11q13.3	NM_001098515	chr11:68773595-68773536	NM_001098515	Hs.118513
A_33_P3310047	-2.27977	-1.18889	2.27977	down	shroom family member 4	SHROOM4	FALSE	Homo sapiens shroom family member 4 (SHROOM4), transcript variant 1, mRNA [NM_020717]	57477	GO:0001725|GO:0030036|GO:0015629|GO:0000902|GO:0005737|GO:0016324|GO:0051015|GO:0009925|GO:0031941|GO:0050890|GO:0007420|GO:0009898|GO:0007015|GO:0030864|GO:0016460	50335055	chrX	50334996	-	hs|Xp11.22	NM_020717	chrX:50335055-50334996	NM_020717	Hs.420541
A_33_P3360675	-2.27924	-1.18855	2.27924	down	protein kinase, cAMP-dependent, regulatory, type I, beta	PRKAR1B	FALSE	Homo sapiens protein kinase, cAMP-dependent, regulatory, type I, beta (PRKAR1B), transcript variant 1, mRNA [NM_001164761]	5575	GO:0034236|GO:2000480|GO:0048011|GO:0005952|GO:0008603|GO:0005886|GO:0044281|GO:0007202|GO:0055085|GO:0005829|GO:0007165|GO:0030552|GO:0006112|GO:0050796|GO:0007173|GO:0071377|GO:0007596|GO:0008543|GO:0045087|GO:0007611|GO:0006468|GO:0004862|GO:0006833|GO:0034199	618953	chr7	618894	-	hs|7p22.3	NM_001164761	chr7:618953-618894	NM_001164761	Hs.520851
A_23_P162525	-2.27862	-1.18816	2.27862	down	UTP20, small subunit (SSU) processome component, homolog (yeast)	UTP20	FALSE	Homo sapiens UTP20, small subunit (SSU) processome component, homolog (yeast) (UTP20), mRNA [NM_014503]	27340	GO:0005515|GO:0000472|GO:0005737|GO:0008285|GO:0006364|GO:0032040|GO:0005730|GO:0000480|GO:0005654|GO:0000447|GO:0030688|GO:0030686	101777410	chr12	101777351	+	hs|12q23.2	NM_014503	chr12:101777351-101777410	NM_014503	Hs.295732
A_33_P3389827	-2.27817	-1.18787	2.27817	down	prominin 2	PROM2	FALSE	Homo sapiens prominin 2 (PROM2), transcript variant 1, mRNA [NM_001165978]	150696	GO:0060170|GO:0009986|GO:0031528|GO:0031410|GO:0042995|GO:0044393|GO:0043088|GO:2001287|GO:0005902|GO:0005929|GO:0016323|GO:0016324|GO:0031346|GO:0005887|GO:0015485|GO:0048550|GO:2000369|GO:0071914|GO:0001934|GO:0045121|GO:0070062	95956061	chr2	95956002	+	hs|2q11.1	NM_001165978	chr2:95956002-95956061	NM_001165978	Hs.469313
A_19_P00804702	-2.27748	-1.18744	2.27748	down	zinc finger and BTB domain containing 20	ZBTB20	FALSE	PREDICTED: Homo sapiens zinc finger and BTB domain containing 20 (ZBTB20), transcript variant X21, mRNA [XM_006713578]	26137	GO:0001078|GO:0005730|GO:0005634|GO:0000122|GO:0003677|GO:0046872|GO:0006351	114042669	chr3	114042610	-	hs|3q13.31	XM_006713578	chr3:114042669-114042610	XM_006713578
A_33_P3398331	-2.27662	-1.18689	2.27662	down	matrix metallopeptidase 24 (membrane-inserted)	MMP24	FALSE	Homo sapiens matrix metallopeptidase 24 (membrane-inserted) (MMP24), mRNA [NM_006690]	10893	GO:0005887|GO:0005509|GO:0006508|GO:0005578|GO:0008270|GO:0043085|GO:0008047|GO:0004222|GO:0070062	33864767	chr20	33864708	+	hs|20q11.22	NM_006690	chr20:33864708-33864767	NM_006690	Hs.715494
A_24_P382001	-2.27568	-1.1863	2.27568	down	polymerase (RNA) III (DNA directed) polypeptide K, 12.3 kDa	POLR3K	FALSE	Homo sapiens polymerase (RNA) III (DNA directed) polypeptide K, 12.3 kDa (POLR3K), mRNA [NM_016310]	51728	GO:0010467|GO:0006386|GO:0006385|GO:0003899|GO:0003677|GO:0006383|GO:0005829|GO:0051607|GO:0001056|GO:0045087|GO:0005666|GO:0005654|GO:0008270|GO:0032481	97487	chr16	97428	-	hs|16p13.3	NM_016310	chr16:97487-97428	NM_016310	Hs.632223
A_23_P163161	-2.27466	-1.18565	2.27466	down	short chain dehydrogenase/reductase family 39U, member 1	SDR39U1	FALSE	Homo sapiens short chain dehydrogenase/reductase family 39U, member 1 (SDR39U1), transcript variant 1, mRNA [NM_020195]	56948	GO:0016491|GO:0005634|GO:0055114	24909270	chr14	24909211	-	hs|14q12	NM_020195	chr14:24909270-24909211	NM_020195	Hs.643552
A_33_P3378835	-2.27378	-1.1851	2.27378	down	solute carrier family 9, subfamily A (NHE3, cation proton antiporter 3), member 3 regulator 1	SLC9A3R1	FALSE	Homo sapiens solute carrier family 9, subfamily A (NHE3, cation proton antiporter 3), member 3 regulator 1 (SLC9A3R1), mRNA [NM_004252]	9368	GO:0005515|GO:0045859|GO:0032416|GO:0008013|GO:0031528|GO:0031698|GO:0031526|GO:0043621|GO:0032403|GO:0032415|GO:0043231|GO:0010766|GO:0032782|GO:0070373|GO:0016055|GO:0050780|GO:0070062|GO:0005813|GO:0030336|GO:0019902|GO:2001244|GO:0014067|GO:0030165|GO:0030643|GO:0034635|GO:0045121|GO:0044062|GO:0051898|GO:0030036|GO:0008285|GO:0005886|GO:0030033|GO:0097225|GO:0005634|GO:0030175|GO:0015629|GO:…	72765371	chr17	72765312	+	hs|17q25.1	NM_004252	chr17:72765312-72765371	NM_004252	Hs.724482
A_23_P819	-2.27311	-1.18467	2.27311	down	ISG15 ubiquitin-like modifier	ISG15	FALSE	Homo sapiens ISG15 ubiquitin-like modifier (ISG15), mRNA [NM_005101]	9636	GO:0005515|GO:0032020|GO:0019221|GO:0005576|GO:0005829|GO:0032649|GO:0051607|GO:0060337|GO:0045648|GO:0045087|GO:0019941|GO:0016032|GO:0031386|GO:0034340|GO:0031397|GO:0032480|GO:0042742|GO:0045071	949626	chr1	949567	+	hs|1p36.33	NM_005101	chr1:949567-949626	NM_005101	Hs.458485
A_33_P3393821	-2.27278	-1.18446	2.27278	down	complement component 1, r subcomponent	C1R	FALSE	Homo sapiens complement component 1, r subcomponent (C1R), mRNA [NM_001733]	715	GO:0005515|GO:0006956|GO:0006955|GO:0004252|GO:0045087|GO:0006958|GO:0005509|GO:0006508|GO:0008236|GO:0072562|GO:0005576	7187895	chr12	7187836	-	hs|12p13.31	NM_001733	chr12:7187895-7187836	NM_001733	Hs.524224
A_33_P3366073	-2.27163	-1.18373	2.27163	down	emopamil binding protein-like	EBPL	FALSE	Homo sapiens emopamil binding protein-like (EBPL), transcript variant 3, long non-coding RNA [NR_103802]	84650	GO:0005783|GO:0005789|GO:0016125|GO:0016021|GO:0047750	50260701	chr13	50260642	-	hs|13q14.2	NR_103802	chr13:50260701-50260642	NR_103802	Hs.433278
A_24_P19228	-2.26822	-1.18156	2.26822	down	guanidinoacetate N-methyltransferase	GAMT	FALSE	Homo sapiens guanidinoacetate N-methyltransferase (GAMT), transcript variant 2, mRNA [NM_138924]	2593	GO:0008168|GO:0007283|GO:0044281|GO:0032259|GO:0005829|GO:0030731|GO:0034641|GO:0006936|GO:0006601|GO:0006600|GO:0040014|GO:0009887|GO:0070062	1399172	chr19	1399012	-	hs|19p13.3	NM_138924	chr19:1399172-1399012	NM_138924	Hs.81131
A_32_P109876	-2.26678	-1.18065	2.26678	down	piccolo presynaptic cytomatrix protein	PCLO	FALSE	Homo sapiens piccolo presynaptic cytomatrix protein (PCLO), transcript variant 1, mRNA [NM_033026]	27445	GO:0005215|GO:0030054|GO:0005509|GO:0045202|GO:0016079|GO:0008021|GO:0005544|GO:0016020|GO:0007010|GO:0017157|GO:0019933|GO:0005856|GO:0005522|GO:0030073	82383663	chr7	82383604	-	hs|7q21.11	NM_033026	chr7:82383663-82383604	NM_033026	Hs.12376
A_33_P3396527	-2.26481	-1.17939	2.26481	down	polymerase (RNA) III (DNA directed) polypeptide G (32kD)	POLR3G	FALSE	Homo sapiens polymerase (RNA) III (DNA directed) polypeptide G (32kD) (POLR3G), mRNA [NM_006467]	10622	GO:0032728|GO:0010467|GO:0000790|GO:0006386|GO:0006385|GO:0003899|GO:0008283|GO:0006359|GO:0006384|GO:0006383|GO:0005829|GO:0051607|GO:0045089|GO:0001056|GO:0045087|GO:0005666|GO:0032481|GO:0005654	89810177	chr5	89810118	+	hs|5q14.3	NM_006467	chr5:89810118-89810177	NM_006467	Hs.282387
A_24_P372134	-2.26458	-1.17924	2.26458	down	transmembrane protein 140	TMEM140	FALSE	Homo sapiens transmembrane protein 140 (TMEM140), mRNA [NM_018295]	55281	GO:0016021	134849722	chr7	134849663	+	hs|7q33	NM_018295	chr7:134849663-134849722	NM_018295	Hs.521213
A_33_P3290707	-2.2641	-1.17894	2.2641	down	membrane metallo-endopeptidase	MME	FALSE	Homo sapiens membrane metallo-endopeptidase (MME), transcript variant 2b, mRNA [NM_007289]	4311	GO:0005515|GO:0030424|GO:0005886|GO:0002003|GO:0045202|GO:0030425|GO:0005737|GO:0006508|GO:0070062|GO:0042277|GO:0044306|GO:0001822|GO:0071492|GO:0071493|GO:0046449|GO:0019233|GO:0050435|GO:0008021|GO:0005903|GO:0004175|GO:0005887|GO:0071345|GO:0008270|GO:0016021|GO:0090399|GO:0004222|GO:0044267|GO:0006518	154802115	chr3	154802056	+	hs|3q25.2	NM_007289	chr3:154802056-154802115	NM_007289	Hs.307734
A_33_P3449097	-2.26401	-1.17888	2.26401	down	tetraspanin 10	TSPAN10	FALSE	Homo sapiens tetraspanin 10 (TSPAN10), transcript variant 1, mRNA [NM_001290212]	83882	GO:0072594|GO:0016021|GO:0019899	79615778	chr17	79615719	+	hs|17q25.3	NM_001290212	chr17:79615719-79615778	NM_001290212	Hs.740811
A_33_P3254751	-2.26381	-1.17875	2.26381	down	ST6 (alpha-N-acetyl-neuraminyl-2,3-beta-galactosyl-1,3)-N-acetylgalactosaminide alpha-2,6-sialyltransferase 6	ST6GALNAC6	FALSE	ST6 (alpha-N-acetyl-neuraminyl-2,3-beta-galactosyl-1,3)-N-acetylgalactosaminide alpha-2,6-sialyltransferase 6 [Source:HGNC Symbol;Acc:23364] [ENST00000483353]	30815	GO:0001665|GO:0006677|GO:0008373|GO:0009312|GO:0005886|GO:0006687|GO:0009988|GO:0005737|GO:0009100|GO:0000139|GO:0001574|GO:0006486|GO:0016021	130665665	chr9	130665606	-	hs|9q34.11	AK124217	chr9:130665665-130665606		Hs.660782
A_23_P368909	-2.26302	-1.17825	2.26302	down	long intergenic non-protein coding RNA 346	LINC00346	FALSE	Homo sapiens long intergenic non-protein coding RNA 346 (LINC00346), long non-coding RNA [NR_027701]	283487		111521859	chr13	111521800	-	hs|13q34	NR_027701	chr13:111521859-111521800	NR_027701	Hs.245390
A_23_P132793	-2.2625	-1.17792	2.2625	down	mesencephalic astrocyte-derived neurotrophic factor	MANF	FALSE	Homo sapiens mesencephalic astrocyte-derived neurotrophic factor (MANF), mRNA [NM_006010]	7873	GO:0006986|GO:0008150|GO:0048471|GO:0002014|GO:0005634|GO:0008083|GO:0005615	51426746	chr3	51426687	+	hs|3p21.2	NM_006010	chr3:51426687-51426746	NM_006010	Hs.436446
A_24_P327050	-2.26118	-1.17708	2.26118	down	trafficking protein particle complex 2-like	TRAPPC2L	FALSE	Homo sapiens trafficking protein particle complex 2-like (TRAPPC2L), mRNA [NM_016209]	51693	GO:0006888|GO:0005515|GO:0048471|GO:0005737|GO:0005794|GO:0005783	88926360	chr16	88926301	+	hs|16q24.3	NM_016209	chr16:88926301-88926360	NM_016209	Hs.461722
A_32_P1701	-2.26019	-1.17644	2.26019	down	polymerase (DNA directed), alpha 1, catalytic subunit	POLA1	FALSE	Homo sapiens polymerase (DNA directed), alpha 1, catalytic subunit (POLA1), mRNA [NM_016937]	5422	GO:0005515|GO:0008408|GO:0090305|GO:0008283|GO:0005658|GO:0003887|GO:0005634|GO:0005635|GO:0006303|GO:0019985|GO:0046872|GO:0016363|GO:0006273|GO:0000084|GO:0000082|GO:0005737|GO:0006271|GO:0006272|GO:0000083|GO:0000723|GO:0000166|GO:0001882|GO:0006270|GO:0000722|GO:0016032|GO:0006297|GO:0000785|GO:0051539|GO:0046982|GO:0003896|GO:0005730|GO:0003677|GO:0006260|GO:0006281|GO:0003682|GO:0000731|GO:…	25014962	chrX	25014903	+	hs|Xp21.3	NM_016937	chrX:25014903-25014962	NM_016937	Hs.567319
A_24_P42136	-2.25915	-1.17578	2.25915	down	keratin 18	KRT18	FALSE	Homo sapiens keratin 18 (KRT18), transcript variant 1, mRNA [NM_000224]	3875	GO:0005515|GO:0005882|GO:0048471|GO:0043066|GO:0005815|GO:0045104|GO:0034451|GO:0097284|GO:0005730|GO:0097191|GO:0009653|GO:0033209|GO:0005737|GO:0007049|GO:0005198|GO:0097110|GO:0016032|GO:0045095|GO:0043000|GO:0070062	53345636	chr12	53345577	+	hs|12q13.13	NM_000224	chr12:53345577-53345636	NM_000224	Hs.406013
A_23_P26928	-2.25736	-1.17464	2.25736	down	coiled-coil domain containing 103	CCDC103	FALSE	family with sequence similarity 187, member A [Source:HGNC Symbol;Acc:35153] [ENST00000331733]	388389	GO:0060287|GO:0001947|GO:0036159|GO:0005737|GO:0005930|GO:0030030|GO:0036158|GO:0003341|GO:0070286|GO:0071907|GO:0042803	42982722	chr17	42982663	+	hs|17q21.31	AK023156	chr17:42982663-42982722		Hs.743398
A_33_P3245321	-2.25672	-1.17423	2.25672	down	centromere protein P	CENPP	FALSE	Homo sapiens centromere protein P (CENPP), transcript variant 1, mRNA [NM_001012267]	401541	GO:0034080|GO:0006334|GO:0005654|GO:0000278|GO:0000775|GO:0005829	95375430	chr9	95375371	+	hs|9q22.31	NM_001012267	chr9:95375371-95375430	NM_001012267	Hs.713775
A_33_P3281435	-2.25495	-1.17309	2.25495	down			FALSE	immunoglobulin kappa variable 1D-8 [Source:HGNC Symbol;Acc:5759] [ENST00000471857]			90260248	chr2	90260191	+	hs|2p11.2	AF035035	chr2:90260191-90260248		Hs.574701
A_23_P75786	-2.25386	-1.1724	2.25386	down	solute carrier family 15 (oligopeptide transporter), member 3	SLC15A3	FALSE	Homo sapiens solute carrier family 15 (oligopeptide transporter), member 3 (SLC15A3), transcript variant 1, mRNA [NM_016582]	51296	GO:0015833|GO:0016021|GO:0015031|GO:0005765|GO:0055085|GO:0015293|GO:0006811	60705358	chr11	60704803	-	hs|11q12.2	NM_016582	chr11:60705358-60704803	NM_016582	Hs.237856
A_33_P3356210	-2.25236	-1.17144	2.25236	down	natural killer cell cytotoxicity receptor 3 ligand 1	NCR3LG1	FALSE	Homo sapiens natural killer cell cytotoxicity receptor 3 ligand 1 (NCR3LG1), mRNA [NM_001202439]	374383	GO:0019028|GO:0005886|GO:0005198|GO:0016021	17398744	chr11	17398685	+	hs|11p15.1	NM_001202439	chr11:17398685-17398744	NM_001202439	Hs.146274
A_33_P3380263	-2.25102	-1.17058	2.25102	down	mitochondrial ribosome-associated GTPase 1	MTG1	FALSE	Homo sapiens mitochondrial ribosome-associated GTPase 1 (MTG1), mRNA [NM_138384]	92170	GO:0006184|GO:0070129|GO:0042254|GO:0005759|GO:0005761|GO:0005743|GO:0003924|GO:0044065|GO:0005525	135234174	chr10	135234115	+	hs|10q26.3	NM_138384	chr10:135234115-135234174	NM_138384	Hs.501578
A_23_P110531	-2.24904	-1.16931	2.24904	down	follistatin	FST	FALSE	Homo sapiens follistatin (FST), transcript variant FST344, mRNA [NM_013409]	10468	GO:0005515|GO:0007389|GO:0007276|GO:0043395|GO:0005576|GO:0005634|GO:0032926|GO:0000122|GO:0030509|GO:0043616|GO:0031069|GO:0008585|GO:0051798|GO:0005737|GO:0048185|GO:0002244|GO:0042475|GO:0045596|GO:0004871	52780896	chr5	52780837	+	hs|5q11.2	NM_013409	chr5:52780837-52780896	NM_013409	Hs.9914
A_23_P138524	-2.24867	-1.16907	2.24867	down	carboxypeptidase X (M14 family), member 2	CPXM2	FALSE	Homo sapiens carboxypeptidase X (M14 family), member 2 (CPXM2), mRNA [NM_198148]	119587	GO:0031012|GO:0006508|GO:0008270|GO:0007155|GO:0005615|GO:0004181	125505253	chr10	125505194	-	hs|10q26.13	NM_198148	chr10:125505253-125505194	NM_198148	Hs.656887
A_23_P123086	-2.24698	-1.16799	2.24698	down	PSMG3 antisense RNA 1 (head to head)	PSMG3-AS1	FALSE	Homo sapiens PSMG3 antisense RNA 1 (head to head) (PSMG3-AS1), transcript variant 1, long non-coding RNA [NR_027329]	114796		1628916	chr7	1628857	+	hs|7p22.3	NR_027329	chr7:1628857-1628916	NR_027329	Hs.436146
A_19_P00320309	-2.24605	-1.16739	2.24605	down			FALSE				43108542	chr21	43108483	-	hs|21q22.3		chr21:043108542-043108483
A_33_P3331228	-2.24566	-1.16714	2.24566	down			FALSE	immunoglobulin heavy variable 3-15 [Source:HGNC Symbol;Acc:5582] [ENST00000390603]			106610383	chr14	106610324	-	hs|14q32.33	AY505570	chr14:106610383-106610324		Hs.649847
A_23_P60499	-2.24192	-1.16474	2.24192	down	zinc finger protein 462	ZNF462	FALSE	Homo sapiens zinc finger protein 462 (ZNF462), mRNA [NM_021224]	58499	GO:0045944|GO:0006325|GO:0005634|GO:0003677|GO:0046872|GO:0006351|GO:0043392	109773709	chr9	109773650	+	hs|9q31.2	NM_021224	chr9:109773650-109773709	NM_021224	Hs.370379
A_33_P3306352	-2.24181	-1.16467	2.24181	down			FALSE	HSJ1167H4 {Homo sapiens} (exp=0; wgp=1; cg=0), partial (92%) [THC2691510]			54935301	chr20	54935242	+	hs|20q13.2		chr20:054935242-054935301
A_33_P3238290	-2.24115	-1.16424	2.24115	down	family with sequence similarity 65, member C	FAM65C	FALSE	Homo sapiens family with sequence similarity 65, member C (FAM65C), transcript variant 2, mRNA [NM_001290268]	140876		49202794	chr20	49202735	-	hs|20q13.13	NM_001290268	chr20:49202794-49202735	NM_001290268	Hs.372578
A_33_P3245489	-2.24085	-1.16404	2.24085	down	ADAMTS-like 5	ADAMTSL5	FALSE	Homo sapiens ADAMTS-like 5 (ADAMTSL5), mRNA [NM_213604]	339366	GO:0031012|GO:0006508|GO:0005578|GO:0001527|GO:0008270|GO:0005576|GO:0004222|GO:0008201	1506798	chr19	1506739	-	hs|19p13.3	NM_213604	chr19:1506798-1506739	NM_213604	Hs.371674
A_23_P33613	-2.24077	-1.164	2.24077	down	dCTP pyrophosphatase 1	DCTPP1	FALSE	Homo sapiens dCTP pyrophosphatase 1 (DCTPP1), mRNA [NM_024096]	79077	GO:0032556|GO:0000287|GO:0051289|GO:0047429|GO:0009143|GO:0047840|GO:0005829	30435368	chr16	30435309	-	hs|16p11.2	NM_024096	chr16:30435368-30435309	NM_024096	Hs.632191
A_23_P94397	-2.24028	-1.16368	2.24028	down	osteomodulin	OMD	FALSE	Homo sapiens osteomodulin (OMD), mRNA [NM_005014]	4958	GO:0018146|GO:0005975|GO:0005796|GO:0042340|GO:0005578|GO:0005576|GO:0044281|GO:0007155|GO:0030203|GO:0043202|GO:0042339	95177617	chr9	95177558	-	hs|9q22.31	NM_005014	chr9:95177617-95177558	NM_005014	Hs.94070
A_32_P4018	-2.23932	-1.16306	2.23932	down	receptor tyrosine kinase-like orphan receptor 1	ROR1	FALSE	Homo sapiens receptor tyrosine kinase-like orphan receptor 1 (ROR1), transcript variant 1, mRNA [NM_005012]	4919	GO:0043235|GO:0005515|GO:0017147|GO:0005737|GO:0005886|GO:0005887|GO:0018108|GO:0004714|GO:0007169|GO:0005524	64646851	chr1	64646792	+	hs|1p31.3	NM_005012	chr1:64646792-64646851	NM_005012	Hs.128753
A_23_P70598	-2.23835	-1.16243	2.23835	down	t-complex 11, testis-specific	TCP11	FALSE	Homo sapiens t-complex 11, testis-specific (TCP11), transcript variant 2, mRNA [NM_018679]	6954	GO:0007275|GO:0016021|GO:0007283|GO:0030154	35086182	chr6	35086123	-	hs|6p21.31	NM_018679	chr6:35086182-35086123	NM_018679	Hs.435371
A_23_P28120	-2.23829	-1.16239	2.23829	down	SIX homeobox 2	SIX2	FALSE	Homo sapiens SIX homeobox 2 (SIX2), mRNA [NM_016932]	10736	GO:0003700|GO:0001822|GO:0008283|GO:0005634|GO:0006606|GO:0048701|GO:0009653|GO:0032403|GO:0043565|GO:0003337|GO:0007501|GO:0002062|GO:0045944|GO:0042474|GO:0045596	45233321	chr2	45233262	-	hs|2p21	NM_016932	chr2:45233321-45233262	NM_016932	Hs.101937
A_23_P128574	-2.23737	-1.1618	2.23737	down	ecto-NOX disulfide-thiol exchanger 1	ENOX1	FALSE	Homo sapiens ecto-NOX disulfide-thiol exchanger 1 (ENOX1), transcript variant 1, mRNA [NM_017993]	55068	GO:0005886|GO:0000166|GO:0016491|GO:0048511|GO:0003676|GO:0005615|GO:0055114	43787918	chr13	43787859	-	hs|13q14.11	NM_017993	chr13:43787918-43787859	NM_017993	Hs.128258
A_23_P109881	-2.23686	-1.16147	2.23686	down	inter-alpha-trypsin inhibitor heavy chain family, member 4	ITIH4	FALSE	Homo sapiens inter-alpha-trypsin inhibitor heavy chain family, member 4 (ITIH4), transcript variant 1, mRNA [NM_002218]	3700	GO:0010951|GO:0005515|GO:0005737|GO:0005886|GO:0004866|GO:0004867|GO:0030212|GO:0072562|GO:0005576|GO:0006953|GO:0034097|GO:0070062	52847378	chr3	52847319	-	hs|3p21.1	NM_002218	chr3:52847378-52847319	NM_002218	Hs.709406
A_33_P3390027	-2.23012	-1.15712	2.23012	down	exocyst complex component 7	EXOC7	FALSE	exocyst complex component 7 [Source:HGNC Symbol;Acc:23214] [ENST00000405068]	23265	GO:0005515|GO:0000145|GO:0005886|GO:0005815|GO:0034451|GO:0061024|GO:0032584|GO:0015031|GO:0006887|GO:0044267|GO:0005829	74088767	chr17	74088708	-	hs|17q25.1	AK022397	chr17:74088767-74088708
A_19_P00808658	-2.22899	-1.15639	2.22899	down			FALSE				30877528	chr21	30877469	+	hs|21q21.3		chr21:030877469-030877528
A_33_P3281807	-2.22879	-1.15626	2.22879	down	Parkinson disease 7 domain containing 1	PDDC1	FALSE	Homo sapiens Parkinson disease 7 domain containing 1 (PDDC1), mRNA [NM_182612]	347862	GO:0008150|GO:0003674|GO:0070062	770374	chr11	770315	-	hs|11p15.5	NM_182612	chr11:770374-770315	NM_182612	Hs.218362
A_33_P3257708	-2.22789	-1.15568	2.22789	down	apolipoprotein A-I binding protein	APOA1BP	FALSE	Homo sapiens apolipoprotein A-I binding protein (APOA1BP), mRNA [NM_144772]	128240	GO:0005515|GO:0005576|GO:0005615|GO:0042803|GO:0044297|GO:0046872|GO:0052856|GO:0005739|GO:0005929|GO:0008150|GO:0000166|GO:0051289|GO:0008152|GO:0070062	156563346	chr1	156563287	+	hs|1q23.1	NM_144772	chr1:156563287-156563346	NM_144772	Hs.528320
A_23_P37914	-2.22729	-1.15529	2.22729	down	solute carrier family 5 (sodium/inositol cotransporter), member 11	SLC5A11	FALSE	Homo sapiens solute carrier family 5 (sodium/inositol cotransporter), member 11 (SLC5A11), transcript variant 1, mRNA [NM_052944]	115584	GO:0005886|GO:0008643|GO:0006915|GO:0016021|GO:0006814|GO:0055085|GO:0015293	24922877	chr16	24922818	+	hs|16p12.1	NM_052944	chr16:24922818-24922877	NM_052944	Hs.164118
A_23_P21436	-2.22635	-1.15468	2.22635	down	PHD finger protein 19	PHF19	FALSE	Homo sapiens PHD finger protein 19 (PHF19), transcript variant 1, mRNA [NM_015651]	26147	GO:0005515|GO:0035098|GO:0061087|GO:0019827|GO:0008270|GO:0035064|GO:0000122|GO:0006351|GO:0016568	123618304	chr9	123618245	-	hs|9q33.2	NM_015651	chr9:123618304-123618245	NM_015651	Hs.460124
A_24_P353638	-2.22557	-1.15417	2.22557	down	SLAM family member 7	SLAMF7	FALSE	Homo sapiens SLAM family member 7 (SLAMF7), transcript variant 1, mRNA [NM_021181]	57823	GO:0030101|GO:0042267|GO:0032814|GO:0004872|GO:0016021|GO:0007155|GO:0009897	160724461	chr1	160724402	+	hs|1q23.3	NM_021181	chr1:160724402-160724461	NM_021181	Hs.517265
A_23_P128706	-2.22526	-1.15397	2.22526	down	dynein, cytoplasmic 1, heavy chain 1	DYNC1H1	FALSE	Homo sapiens dynein, cytoplasmic 1, heavy chain 1 (DYNC1H1), mRNA [NM_001376]	1778	GO:0005515|GO:0008219|GO:0005813|GO:0033962|GO:0006200|GO:0005874|GO:0003777|GO:0005524|GO:0005829|GO:0019886|GO:0034063|GO:0000086|GO:0006810|GO:0005868|GO:0000278|GO:0007052|GO:0016887|GO:0070062|GO:0007018	102516820	chr14	102516525	+	hs|14q32.31	NM_001376	chr14:102516525-102516820	NM_001376	Hs.614080
A_24_P159648	-2.22525	-1.15397	2.22525	down	BAI1-associated protein 2	BAIAP2	FALSE	Homo sapiens BAI1-associated protein 2 (BAIAP2), transcript variant 3, mRNA [NM_006340]	10458	GO:0008286|GO:0005515|GO:0043005|GO:0017124|GO:0005886|GO:0008360|GO:0007409|GO:0030175|GO:0015629|GO:0005829|GO:0042802|GO:0009617|GO:0005737|GO:0048167|GO:0032956|GO:0046847|GO:0051764|GO:0070064|GO:0051017|GO:0008093|GO:0070062|GO:0008022|GO:0001726|GO:0016358|GO:0045087|GO:0038096	79079905	chr17	79078484	+	hs|17q25.3	NM_006340	chr17:79078484-79079905	NM_006340	Hs.128316
A_23_P151280	-2.22449	-1.15347	2.22449	down	cytochrome c oxidase assembly homolog 14 (S. cerevisiae)	COX14	FALSE	Homo sapiens cytochrome c oxidase assembly homolog 14 (S. cerevisiae) (COX14), transcript variant 1, mRNA [NM_032901]	84987	GO:0033617|GO:0005739|GO:0031966|GO:0016021	50514184	chr12	50514125	+	hs|12q13.12	NM_032901	chr12:50514125-50514184	NM_032901	Hs.388645
A_23_P100326	-2.22444	-1.15344	2.22444	down	nitrogen permease regulator-like 3 (S. cerevisiae)	NPRL3	FALSE	Homo sapiens nitrogen permease regulator-like 3 (S. cerevisiae) (NPRL3), transcript variant 2, mRNA [NM_001039476]	8131	GO:0048738|GO:0043547|GO:0008150|GO:0003674|GO:0035909|GO:0060021|GO:0003281|GO:0005575|GO:0005096	135898	chr16	135839	-	hs|16p13.3	NM_001039476	chr16:135898-135839	NM_001039476	Hs.19699
A_23_P55064	-2.22328	-1.15269	2.22328	down	WD repeat containing, antisense to TP53	WRAP53	FALSE	Homo sapiens WD repeat containing, antisense to TP53 (WRAP53), transcript variant 1, mRNA [NM_018081]	55135	GO:0005515|GO:0005737|GO:0005697|GO:0015030|GO:0003723|GO:0032203|GO:0005730|GO:0005634|GO:0051973	7605699	chr17	7605086	+	hs|17p13.1	NM_018081	chr17:7605086-7605699	NM_018081	Hs.408312
A_19_P00321941	-2.22323	-1.15265	2.22323	down	long intergenic non-protein coding RNA 704	LINC00704	FALSE	Homo sapiens long intergenic non-protein coding RNA 704 (LINC00704), long non-coding RNA [NR_024475]	100216001		4692437	chr10	4692378	-	hs|10p15.1		chr10:4692437-4692378	NR_024475	Hs.634869
A_23_P28733	-2.2215	-1.15154	2.2215	down	retinoblastoma-like 1	RBL1	FALSE	Homo sapiens retinoblastoma-like 1 (RBL1), transcript variant 1, mRNA [NM_002895]	5933	GO:0005515|GO:0005667|GO:0010467|GO:0006367|GO:0005730|GO:0043550|GO:0005634|GO:0000122|GO:0006351|GO:0045944|GO:0051726|GO:0016032|GO:0005654|GO:0007179|GO:0000278|GO:0016568|GO:0008134	35627256	chr20	35627197	-	hs|20q11.23	NM_002895	chr20:35627256-35627197	NM_002895	Hs.207745
A_33_P3854217	-2.22101	-1.15121	2.22101	down	KIAA0319-like	KIAA0319L	FALSE	Homo sapiens KIAA0319-like (KIAA0319L), mRNA [NM_024874]	79932	GO:0005515|GO:0031410|GO:0016021|GO:0070062	35900305	chr1	35900246	-	hs|1p34.3	NM_024874	chr1:35900305-35900246	NM_024874	Hs.456507
A_33_P3212994	-2.22077	-1.15106	2.22077	down	ZW10 interacting kinetochore protein	ZWINT	FALSE	Homo sapiens ZW10 interacting kinetochore protein (ZWINT), transcript variant 2, mRNA [NM_032997]	11130	GO:0005515|GO:0007093|GO:0048015|GO:0005634|GO:0030425|GO:0005829|GO:0000070|GO:0005737|GO:0007049|GO:0047485|GO:0000777|GO:0051649|GO:0000776|GO:0007051|GO:0000278	58117666	chr10	58117607	-	hs|10q21.1	NM_032997	chr10:58117666-58117607	NM_032997	Hs.591363
A_23_P100315	-2.21861	-1.14966	2.21861	down	2,4-dienoyl CoA reductase 2, peroxisomal	DECR2	FALSE	Homo sapiens 2,4-dienoyl CoA reductase 2, peroxisomal (DECR2), mRNA [NM_020664]	26063	GO:0008670|GO:0006636|GO:0019166|GO:0005102|GO:0005778|GO:0055114	462280	chr16	462221	+	hs|16p13.3	NM_020664	chr16:462221-462280	NM_020664	Hs.628831
A_23_P144326	-2.2181	-1.14933	2.2181	down	ankyrin repeat and SOCS box containing 5	ASB5	FALSE	Homo sapiens ankyrin repeat and SOCS box containing 5 (ASB5), mRNA [NM_080874]	140458	GO:0035556|GO:0016567	177135110	chr4	177135051	-	hs|4q34.2	NM_080874	chr4:177135110-177135051	NM_080874	Hs.591712
A_24_P138022	-2.21733	-1.14882	2.21733	down	family with sequence similarity 120A	FAM120A	FALSE	Homo sapiens family with sequence similarity 120A (FAM120A), transcript variant 1, mRNA [NM_014612]	23196	GO:0005737|GO:0005886	96326608	chr9	96326549	+	hs|9q22.31	NM_014612	chr9:96326549-96326608	NM_014612	Hs.372003
A_33_P3659678	-2.21652	-1.1483	2.21652	down	nuclear receptor subfamily 6, group A, member 1	NR6A1	FALSE	Homo sapiens nuclear receptor subfamily 6, group A, member 1 (NR6A1), transcript variant 1, mRNA [NM_033334]	2649	GO:0005667|GO:0010467|GO:0006367|GO:0007276|GO:0008283|GO:0003707|GO:0000122|GO:0007283|GO:0003677|GO:0042803|GO:0043565|GO:0043401|GO:0005654|GO:0008270|GO:0004879|GO:0030522	127280335	chr9	127280276	-	hs|9q33.3	NM_033334	chr9:127280335-127280276	NM_033334	Hs.586460
A_23_P401084	-2.21628	-1.14814	2.21628	down	zinc finger protein 575	ZNF575	FALSE	Homo sapiens zinc finger protein 575 (ZNF575), mRNA [NM_174945]	284346	GO:0006355|GO:0005634|GO:0003677|GO:0046872|GO:0006351	44040076	chr19	44040017	+	hs|19q13.31	NM_174945	chr19:44040017-44040076	NM_174945	Hs.213534
A_19_P00319201	-2.21451	-1.14699	2.21451	down	coiled-coil domain containing 149	CCDC149	FALSE	Homo sapiens coiled-coil domain containing 149 (CCDC149), transcript variant 1, mRNA [NM_173463]	91050		24808200	chr4	24808141	-	hs|4p15.2	NM_173463	chr4:24808200-24808141	NM_173463	Hs.106432
A_23_P33683	-2.2144	-1.14692	2.2144	down	membrane-associated ring finger (C3HC4) 2, E3 ubiquitin protein ligase	2017-03-02	FALSE	Homo sapiens membrane-associated ring finger (C3HC4) 2, E3 ubiquitin protein ligase (MARCH2), transcript variant 1, mRNA [NM_016496]	51257	GO:0004842|GO:0016567|GO:0005783|GO:0016874|GO:0005789|GO:0008270|GO:0031410|GO:0016021|GO:0005765|GO:0010008|GO:0006897	8503430	chr19	8503371	+	hs|19p13.2	NM_016496	chr19:8503371-8503430	NM_016496	Hs.631861
A_23_P370434	-2.21256	-1.14571	2.21256	down	complement component 1, q subcomponent binding protein	C1QBP	FALSE	Homo sapiens complement component 1, q subcomponent binding protein (C1QBP), mRNA [NM_001212]	708	GO:0005515|GO:0008380|GO:0051897|GO:0050687|GO:0030984|GO:0030449|GO:0048025|GO:0005886|GO:0070131|GO:0005634|GO:0003729|GO:0005615|GO:2000510|GO:0005829|GO:0005739|GO:0005737|GO:0006955|GO:1900026|GO:0005540|GO:0005759|GO:0039536|GO:0005080|GO:0006958|GO:0016032|GO:0097177|GO:0032689|GO:0006397|GO:0043065|GO:0042256|GO:0009986|GO:0003714|GO:0001849|GO:0005730|GO:0006915|GO:0039534|GO:0000122|GO:…	5336307	chr17	5336248	-	hs|17p13.2	NM_001212	chr17:5336307-5336248	NM_001212	Hs.555866
[truncated: 262 more rows]
