# Supplementary material for: TGFβ1-Induced Differentiation of Human Bone Marrow-Derived MSCs Is Mediated by Changes to the Actin Cytoskeleton
Source: Stem Cells Int. 2018 Feb 15;2018:6913594. doi: 10.1155/2018/6913594 (PMC5832166; doi:10.1155/2018/6913594)
Supplement: Supplementary 3 — Table S2: whole genome microarray mRNA data showing gene ENTITIES for TG1 versus CNT UP 1932 genes. [file 6913594.f3.xlsx]

## Sheet: S. TABLE2   ALL ENTITIES  TG1 v
ProbeName	FC ([TG1] vs [CNT])	Log FC ([TG1] vs [CNT])	FC (abs) ([TG1] vs [CNT])	Regulation ([TG1] vs [CNT])	GeneName	GeneSymbol	ControlType	Description	EntrezGeneID	Go	Chromosome End Index_Avadis_	Chromosome Number_Avadis_	Chromosome Start Index_Avadis_	Chromosome Strand_Avadis_	Cytoband	GenbankAccession	GenomicCoordinates	RefSeqAccession	UniGeneID
A_33_P3307495	110.263	6.7848	110.263	up	stimulated by retinoic acid 6	STRA6	FALSE	Homo sapiens stimulated by retinoic acid 6 (STRA6), transcript variant 8, mRNA [NM_001199042]	64220	GO:0060426|GO:0007631|GO:0007603|GO:0005886|GO:0030325|GO:0030324|GO:0003184|GO:0048844|GO:0003281|GO:0043583|GO:0050905|GO:0007507|GO:0048589|GO:0061029|GO:0048745|GO:0042573|GO:0048520|GO:0061143|GO:0004872|GO:0097070|GO:0007612|GO:0060900|GO:0001568|GO:0048286|GO:0051183|GO:0001822|GO:0048566|GO:0001523|GO:0048546|GO:0043234|GO:0061156|GO:0060325|GO:0050890|GO:0071939|GO:0061205|GO:0061038|GO:…	74471871	chr15	74471812	-	hs|15q24.1	NM_001199042	chr15:74471871-74471812	NM_001199042	Hs.24553
A_33_P3379886	110.03	6.78175	110.03	up	fibroblast growth factor 2 (basic)	FGF2	FALSE	Homo sapiens fibroblast growth factor 2 (basic) (FGF2), mRNA [NM_002006]	2247	GO:0060045|GO:0005515|GO:0001658|GO:0030308|GO:0001759|GO:0048598|GO:0048678|GO:0005615|GO:0007173|GO:0006935|GO:0010764|GO:0032958|GO:0043552|GO:0030198|GO:0009887|GO:0051781|GO:0051209|GO:0017134|GO:0005125|GO:0042056|GO:0043536|GO:0008543|GO:0045087|GO:0042060|GO:0006700|GO:0010001|GO:0045893|GO:0045892|GO:0008083|GO:0038095|GO:0043537|GO:0008286|GO:0008284|GO:0008285|GO:0030324|GO:0002042|GO:…	123819376	chr4	123819317	+	hs|4q28.1	NM_002006	chr4:123819317-123819376	NM_002006	Hs.284244
A_19_P00317109	78.8122	6.30035	78.8122	up	long intergenic non-protein coding RNA 657	LINC00657	FALSE	Homo sapiens long intergenic non-protein coding RNA 657 (LINC00657), long non-coding RNA [NR_027451]	647979		34633603	chr20	34633544	-	hs|20q11.23	NR_027451	chr20:34633603-34633544	NR_027451	Hs.743232
A_23_P501634	76.9236	6.26535	76.9236	up	butyrophilin, subfamily 2, member A1	BTN2A1	FALSE	Homo sapiens butyrophilin, subfamily 2, member A1 (BTN2A1), transcript variant 2, mRNA [NM_078476]	11120	GO:0006629|GO:0003674|GO:0005887|GO:0070062	26469831	chr6	26469772	+	hs|6p22.2	NM_078476	chr6:26469772-26469831	NM_078476	Hs.159028
A_32_P105549	62.2714	5.9605	62.2714	up	annexin A8-like 1	ANXA8L1	FALSE	Homo sapiens annexin A8-like 1 (ANXA8L1), transcript variant 1, mRNA [NM_001098845]	728113	GO:0005544|GO:0005509	47763018	chr10	47762959	+	hs|10q11.22	NM_001098845	chr10:47762959-47763018	NM_001098845	Hs.744068
A_24_P84608	58.16	5.86195	58.16	up			FALSE				22748109	chr9	22748048	+	hs|9p21.3		chr9:022748048-022748109
A_24_P573533	57.946	5.85664	57.946	up	COBW domain containing 5	CBWD5	FALSE	Homo sapiens COBW domain containing 5 (CBWD5), transcript variant 1, mRNA [NM_001024916]	220869	GO:0005524	70432360	chr9	70432301	-	hs|9q21.11	NM_001024916	chr9:70432360-70432301	NM_001024916	Hs.645337
A_19_P00802546	54.2711	5.76211	54.2711	up	family with sequence similarity 199, X-linked	FAM199X	FALSE	Homo sapiens family with sequence similarity 199, X-linked (FAM199X), mRNA [NM_207318]	139231		103440514	chrX	103440455	+	hs|Xq22.2	NM_207318	chrX:103440455-103440514	NM_207318	Hs.496535
A_23_P429082	50.5384	5.65931	50.5384	up	SPT2, Suppressor of Ty, domain containing 1 (S. cerevisiae)	SPTY2D1	FALSE	Homo sapiens SPT2, Suppressor of Ty, domain containing 1 (S. cerevisiae) (SPTY2D1), mRNA [NM_194285]	144108	GO:0008150|GO:0003674|GO:0005575	18628254	chr11	18628195	-	hs|11p15.1	NM_194285	chr11:18628254-18628195	NM_194285	Hs.745113
A_33_P3283833	49.7309	5.63607	49.7309	up	forkhead box S1	FOXS1	FALSE	Homo sapiens forkhead box S1 (FOXS1), mRNA [NM_004118]	2307	GO:0001656|GO:0008286|GO:0001657|GO:0003700|GO:0055010|GO:0006366|GO:0003705|GO:0001756|GO:0048844|GO:0005634|GO:0048703|GO:0043433|GO:0001946|GO:0050880|GO:0003690|GO:0007219|GO:0045944|GO:0030199|GO:0050885|GO:0043010|GO:0040018|GO:0048010|GO:0046620|GO:0005667|GO:0043066|GO:0001569|GO:0001568|GO:0035050|GO:0008301|GO:0000122|GO:0003677|GO:0060038|GO:0031490|GO:0043565|GO:0001503|GO:0001974|GO:…	30432163	chr20	30432104	-	hs|20q11.21	NM_004118	chr20:30432163-30432104	NM_004118	Hs.516971
A_23_P353316	47.4374	5.56795	47.4374	up	SMAD specific E3 ubiquitin protein ligase 1	SMURF1	FALSE	Homo sapiens SMAD specific E3 ubiquitin protein ligase 1 (SMURF1), transcript variant 1, mRNA [NM_020429]	57154	GO:0005515|GO:0004842|GO:0016567|GO:0005886|GO:0016874|GO:0005634|GO:0030154|GO:0005829|GO:0030514|GO:0005737|GO:0030279|GO:0042787|GO:0048185|GO:0006611|GO:0043025|GO:0007179|GO:0030579|GO:0030512|GO:0070062|GO:0000209|GO:0070411|GO:0070412|GO:0030509|GO:0007398|GO:0032801|GO:0034394|GO:0005654|GO:0043161	98625237	chr7	98625178	-	hs|7q22.1	NM_020429	chr7:98625237-98625178	NM_020429	Hs.189329
A_24_P215804	45.8308	5.51825	45.8308	up	chemokine-like factor	CKLF	FALSE	Homo sapiens chemokine-like factor (CKLF), transcript variant 1, mRNA [NM_016951]	51192	GO:0008009|GO:0008283|GO:0030593|GO:0048247|GO:0005576|GO:0048246|GO:0016021|GO:0032940|GO:0005615	66599959	chr16	66599900	+	hs|16q21	NM_016951	chr16:66599900-66599959	NM_016951	Hs.15159
A_33_P3286066	45.2522	5.49991	45.2522	up	pleckstrin homology-like domain, family B, member 2	PHLDB2	FALSE	Homo sapiens pleckstrin homology-like domain, family B, member 2 (PHLDB2), transcript variant 1, mRNA [NM_001134438]	90102	GO:0005515|GO:0005737|GO:0005886|GO:0045111	111694515	chr3	111694456	+	hs|3q13.2	NM_001134438	chr3:111694456-111694515	NM_001134438	Hs.603252
A_24_P53150	44.9577	5.4905	44.9577	up	TNF receptor-associated factor 7, E3 ubiquitin protein ligase	TRAF7	FALSE	Homo sapiens TNF receptor-associated factor 7, E3 ubiquitin protein ligase (TRAF7), mRNA [NM_032271]	84231	GO:0005515|GO:0004842|GO:0006355|GO:0016567|GO:0016874|GO:2001235|GO:0000151|GO:0006915|GO:0006351|GO:0000185|GO:0016023|GO:0008270|GO:0043410	2228050	chr16	2227991	+	hs|16p13.3	NM_032271	chr16:2227991-2228050	NM_032271	Hs.713632
A_23_P321501	43.2858	5.43582	43.2858	up	dehydrogenase/reductase (SDR family) member 2	DHRS2	FALSE	Homo sapiens dehydrogenase/reductase (SDR family) member 2 (DHRS2), transcript variant 1, mRNA [NM_182908]	10202	GO:0043066|GO:0004090|GO:0008285|GO:0009636|GO:0005634|GO:0005635|GO:0005739|GO:0005737|GO:0005759|GO:0008207|GO:0034599|GO:0043011|GO:0070062|GO:0055114	24114560	chr14	24114500	+	hs|14q11.2	NM_182908	chr14:24114500-24114560	NM_182908	Hs.272499
A_33_P3365097	40.3666	5.33509	40.3666	up	outer dense fiber of sperm tails 2-like	ODF2L	FALSE	Homo sapiens outer dense fiber of sperm tails 2-like (ODF2L), transcript variant 3, mRNA [NM_001184765]	57489	GO:0005813	86814480	chr1	86814421	-	hs|1p22.3	NM_001184765	chr1:86814480-86814421	NM_001184765	Hs.149360
A_33_P3343250	40.2561	5.33114	40.2561	up	G protein-coupled receptor 1	GPR1	FALSE	Homo sapiens G protein-coupled receptor 1 (GPR1), transcript variant 4, mRNA [NM_001261453]	2825	GO:0007186|GO:0005887|GO:0004930	207040103	chr2	207040044	-	hs|2q33.3	NM_001261453	chr2:207040103-207040044	NM_001261453	Hs.184907
A_23_P407206	40.1368	5.32685	40.1368	up	ceroid-lipofuscinosis, neuronal 8 (epilepsy, progressive with mental retardation)	CLN8	FALSE	Homo sapiens ceroid-lipofuscinosis, neuronal 8 (epilepsy, progressive with mental retardation) (CLN8), mRNA [NM_018941]	2055	GO:0008219|GO:0008361|GO:0060041|GO:0005783|GO:0006672|GO:0045494|GO:0005739|GO:0030163|GO:0050881|GO:0033116|GO:0050884|GO:0050885|GO:0007628|GO:0046513|GO:0044257|GO:0008203|GO:0008306|GO:0060052|GO:0005793|GO:0008610|GO:0021523|GO:0043066|GO:0051348|GO:0045861|GO:0007399|GO:0006869|GO:0035176|GO:0005789|GO:0051935|GO:0007006|GO:0016021|GO:0006644|GO:0007601|GO:0007040|GO:0001306	1734701	chr8	1734642	+	hs|8p23.3	NM_018941	chr8:1734642-1734701	NM_018941	Hs.127675
A_32_P144342	37.1064	5.2136	37.1064	up	poly (ADP-ribose) polymerase family, member 4	PARP4	FALSE	Homo sapiens poly (ADP-ribose) polymerase family, member 4 (PARP4), mRNA [NM_006437]	143	GO:0005515|GO:0008219|GO:0042493|GO:0005634|GO:0003677|GO:0006974|GO:0003950|GO:0006471|GO:0005737|GO:0006281|GO:0006954|GO:0030529|GO:0006810|GO:0005876|GO:0019899|GO:0006464|GO:0070062	24995222	chr13	24995163	-	hs|13q12.12	NM_006437	chr13:24995222-24995163	NM_006437	Hs.744855
A_33_P3270295	35.2243	5.1385	35.2243	up	fibroblast growth factor receptor substrate 3	FRS3	FALSE	Homo sapiens fibroblast growth factor receptor substrate 3 (FRS3), mRNA [NM_006653]	10817	GO:0005515|GO:0007165|GO:0005886|GO:0008543|GO:0005158|GO:0005104	41738005	chr6	41737946	-	hs|6p21.1	NM_006653	chr6:41738005-41737946	NM_006653	Hs.194208
A_32_P200238	33.6066	5.07067	33.6066	up	urothelial cancer associated 1 (non-protein coding)	UCA1	FALSE	Homo sapiens urothelial cancer associated 1 (non-protein coding) (UCA1), long non-coding RNA [NR_015379]	652995		15946092	chr19	15946035	+	hs|19p13.12	NR_015379	chr19:15946035-15946092	NR_015379	Hs.644234
A_19_P00811048	33.5594	5.06865	33.5594	up	ZEB1 antisense RNA 1	ZEB1-AS1	FALSE	Homo sapiens ZEB1 antisense RNA 1 (ZEB1-AS1), long non-coding RNA [NR_024284]	220930		31605526	chr10	31605467	-	hs|10p11.22	NR_024284	chr10:31605526-31605467	NR_024284	Hs.372654
A_33_P3241489	33.0449	5.04635	33.0449	up	CEBPZ opposite strand	CEBPZOS	FALSE	Homo sapiens CEBPZ opposite strand (CEBPZOS), transcript variant 1, long non-coding RNA [NR_037879]	100505876		37431882	chr2	37431823	+	hs|2p22.2	NR_037879	chr2:37431823-37431882	NR_037879	Hs.743972
A_33_P3383331	32.9721	5.04317	32.9721	up	solute carrier family 35 (UDP-N-acetylglucosamine (UDP-GlcNAc) transporter), member A3	SLC35A3	FALSE	Homo sapiens solute carrier family 35 (UDP-N-acetylglucosamine (UDP-GlcNAc) transporter), member A3 (SLC35A3), transcript variant 1, mRNA [NM_012243]	23443	GO:0005515|GO:0005794|GO:0000139|GO:0005462|GO:0008643|GO:0005351|GO:0016021|GO:0006047|GO:0015788|GO:0055085|GO:0015992	100489006	chr1	100488947	+	hs|1p21.2	NM_012243	chr1:100488947-100489006	NM_012243	Hs.448979
A_23_P155989	32.1488	5.00669	32.1488	up	centromere protein K	CENPK	FALSE	Homo sapiens centromere protein K (CENPK), transcript variant 1, mRNA [NM_022145]	64105	GO:0034080|GO:0045944|GO:0006334|GO:0000777|GO:0005654|GO:0000278|GO:0005829	64813872	chr5	64813813	-	hs|5q12.3	NM_022145	chr5:64813872-64813813	NM_022145	Hs.529778
A_24_P397903	31.4379	4.97443	31.4379	up	zinc finger, C2HC-type containing 1A	ZC2HC1A	FALSE	Homo sapiens zinc finger, C2HC-type containing 1A (ZC2HC1A), mRNA [NM_016010]	51101	GO:0046872	79631856	chr8	79631797	+	hs|8q21.12	NM_016010	chr8:79631797-79631856	NM_016010	Hs.271876
A_24_P99046	30.8416	4.94681	30.8416	up	serine/threonine kinase 38 like	STK38L	FALSE	Homo sapiens serine/threonine kinase 38 like (STK38L), mRNA [NM_015000]	23012	GO:0035556|GO:0005515|GO:0005737|GO:0000287|GO:0016020|GO:0004674|GO:0051128|GO:0006468|GO:0003779|GO:0015629|GO:0005524	27478454	chr12	27478395	+	hs|12p11.23	NM_015000	chr12:27478395-27478454	NM_015000	Hs.184523
A_23_P138194	29.7905	4.89678	29.7905	up	neutrophil cytosolic factor 2	NCF2	FALSE	Homo sapiens neutrophil cytosolic factor 2 (NCF2), transcript variant 1, mRNA [NM_000433]	4688	GO:0045730|GO:0005515|GO:0002474|GO:0006801|GO:0045777|GO:0032870|GO:0005829|GO:0005737|GO:0043525|GO:0032496|GO:0032010|GO:0090382|GO:0042554|GO:0014823|GO:0051701|GO:0001669|GO:0042493|GO:0007568|GO:0005730|GO:0042590|GO:0009055|GO:0008022|GO:0009749|GO:0048365|GO:0006968|GO:0034616|GO:0045087|GO:0055093|GO:0032570|GO:0002479|GO:0043020	183524784	chr1	183524725	-	hs|1q25.3	NM_000433	chr1:183524784-183524725	NM_000433	Hs.587558
A_24_P128524	29.6886	4.89184	29.6886	up	isoprenylcysteine carboxyl methyltransferase	ICMT	FALSE	Homo sapiens isoprenylcysteine carboxyl methyltransferase (ICMT), mRNA [NM_012405]	23463	GO:0008284|GO:0005783|GO:0046578|GO:0001701|GO:0001889|GO:0004671|GO:0008140|GO:0035264|GO:0016020|GO:0006481|GO:0006612|GO:0003880|GO:0005789|GO:0016021|GO:2001141|GO:0006464	6281375	chr1	6281316	-	hs|1p36.31	NM_012405	chr1:6281375-6281316	NM_012405	Hs.515688
A_33_P3419696	29.5217	4.88371	29.5217	up	fibroblast growth factor 2 (basic)	FGF2	FALSE	Homo sapiens fibroblast growth factor 2 (basic) (FGF2), mRNA [NM_002006]	2247	GO:0060045|GO:0005515|GO:0001658|GO:0030308|GO:0001759|GO:0048598|GO:0048678|GO:0005615|GO:0007173|GO:0006935|GO:0010764|GO:0032958|GO:0043552|GO:0030198|GO:0009887|GO:0051781|GO:0051209|GO:0017134|GO:0005125|GO:0042056|GO:0043536|GO:0008543|GO:0045087|GO:0042060|GO:0006700|GO:0010001|GO:0045893|GO:0045892|GO:0008083|GO:0038095|GO:0043537|GO:0008286|GO:0008284|GO:0008285|GO:0030324|GO:0002042|GO:…	123819390	chr4	123819331	+	hs|4q28.1	NM_002006	chr4:123819331-123819390	NM_002006	Hs.284244
A_24_P250922	28.8595	4.85097	28.8595	up	prostaglandin-endoperoxide synthase 2 (prostaglandin G/H synthase and cyclooxygenase)	PTGS2	FALSE	Homo sapiens prostaglandin-endoperoxide synthase 2 (prostaglandin G/H synthase and cyclooxygenase) (PTGS2), mRNA [NM_000963]	5743	GO:0019369|GO:0006693|GO:0035633|GO:0042640|GO:0010042|GO:0042803|GO:0071636|GO:0031622|GO:0034644|GO:0004601|GO:0001516|GO:0032496|GO:0090050|GO:0051926|GO:0007613|GO:0007612|GO:0006979|GO:0032355|GO:0007566|GO:0051968|GO:0031394|GO:0051384|GO:0045786|GO:0071318|GO:0043234|GO:0070542|GO:0050873|GO:0032227|GO:0005789|GO:0019899|GO:0055114|GO:0020037|GO:0042346|GO:0043005|GO:0008285|GO:0006928|GO:…	186641528	chr1	186641469	-	hs|1q31.1	NM_000963	chr1:186641528-186641469	NM_000963	Hs.196384
A_23_P63908	28.6312	4.83952	28.6312	up	TruB pseudouridine (psi) synthase family member 1	TRUB1	FALSE	Homo sapiens TruB pseudouridine (psi) synthase family member 1 (TRUB1), mRNA [NM_139169]	142940	GO:0009982|GO:0003723|GO:0001522|GO:0008033	116737367	chr10	116737308	+	hs|10q25.3	NM_139169	chr10:116737308-116737367	NM_139169	Hs.21187
A_33_P3333224	28.6049	4.83819	28.6049	up	GLIS family zinc finger 2	GLIS2	FALSE	Homo sapiens GLIS family zinc finger 2 (GLIS2), mRNA [NM_032575]	84662	GO:0005515|GO:0044212|GO:0005634|GO:0045879|GO:0000122|GO:0046872|GO:0006351|GO:0030154|GO:0043433|GO:0007399|GO:0001077|GO:0005737|GO:0016607|GO:0045944|GO:0045893|GO:0045892	4389595	chr16	4389536	+	hs|16p13.3	NM_032575	chr16:4389536-4389595	NM_032575	Hs.592087
A_23_P363255	28.552	4.83552	28.552	up	coiled-coil domain containing 68	CCDC68	FALSE	Homo sapiens coiled-coil domain containing 68 (CCDC68), transcript variant 1, mRNA [NM_025214]	80323		52568911	chr18	52568852	-	hs|18q21.2	NM_025214	chr18:52568911-52568852	NM_025214	Hs.120790
A_24_P32085	27.9861	4.80664	27.9861	up	MOB kinase activator 3B	MOB3B	FALSE	Homo sapiens MOB kinase activator 3B (MOB3B), mRNA [NM_024761]	79817	GO:0005515|GO:0046872	27326043	chr9	27325984	-	hs|9p21.2	NM_024761	chr9:27326043-27325984	NM_024761	Hs.369022
A_23_P325887	27.5276	4.78281	27.5276	up	TBC1 domain family, member 8B (with GRAM domain)	TBC1D8B	FALSE	Homo sapiens TBC1 domain family, member 8B (with GRAM domain) (TBC1D8B), transcript variant 1, mRNA [NM_017752]	54885	GO:0005509|GO:0032851|GO:0005097	106119071	chrX	106119012	+	hs|Xq22.3	NM_017752	chrX:106119012-106119071	NM_017752	Hs.351798
A_33_P3332145	27.3852	4.77532	27.3852	up	ribophorin II	RPN2	FALSE	Homo sapiens ribophorin II (RPN2), transcript variant 1, mRNA [NM_002951]	6185	GO:0005791|GO:0010467|GO:0005783|GO:0042493|GO:0006614|GO:0000421|GO:0007568|GO:0005634|GO:0006412|GO:0004579|GO:0005789|GO:0043022|GO:0016021|GO:0008250|GO:0044267|GO:0006464|GO:0043687|GO:0018279	35869769	chr20	35869710	+	hs|20q11.23	NM_002951	chr20:35869710-35869769	NM_002951	Hs.370895
A_23_P416314	26.8862	4.7488	26.8862	up	HRAS-like suppressor family, member 5	HRASLS5	FALSE	Homo sapiens HRAS-like suppressor family, member 5 (HRASLS5), transcript variant 1, mRNA [NM_054108]	117245	GO:0016746|GO:0008152	63229094	chr11	63229035	-	hs|11q12.3	NM_054108	chr11:63229094-63229035	NM_054108	Hs.410316
A_33_P3422294	25.7579	4.68694	25.7579	up			FALSE				106531045	chr5	106530986	+	hs|5q21.3		chr5:106530986-106531045
A_23_P216429	25.5211	4.67362	25.5211	up	asporin	ASPN	FALSE	Homo sapiens asporin (ASPN), transcript variant 1, mRNA [NM_017680]	54829	GO:0031012|GO:0070171|GO:0005518|GO:0005509|GO:0005578|GO:0030282|GO:0030512	95218993	chr9	95218934	-	hs|9q22.31	NM_017680	chr9:95218993-95218934	NM_017680	Hs.435655
A_33_P3519223	25.3878	4.66606	25.3878	up			FALSE
A_23_P167812	25.2874	4.66035	25.2874	up	RNA binding motif protein 24	RBM24	FALSE	Homo sapiens RNA binding motif protein 24 (RBM24), transcript variant 2, mRNA [NM_153020]	221662	GO:0043488|GO:0005737|GO:0000166|GO:0010830|GO:0005634|GO:0003730|GO:0030154	17293790	chr6	17293731	+	hs|6p22.3	NM_153020	chr6:17293731-17293790	NM_153020	Hs.519904
A_19_P00325227	25.1113	4.65027	25.1113	up			FALSE				234918563	chr1	234918504	+	hs|1q42.3		chr1:234918504-234918563
A_24_P108291	25.1092	4.65015	25.1092	up	impact RWD domain protein	IMPACT	FALSE	Homo sapiens impact RWD domain protein (IMPACT), mRNA [NM_018439]	55364	GO:0008150|GO:0003674|GO:0005737|GO:0006446|GO:0001933|GO:0005575	22033228	chr18	22033169	+	hs|18q11.2	NM_018439	chr18:22033169-22033228	NM_018439	Hs.515317
A_33_P3295091	24.7615	4.63002	24.7615	up	uncharacterized LOC400804	C1orf140	FALSE	Homo sapiens uncharacterized LOC400804 (C1orf140), long non-coding RNA [NR_024236]	400804		221503329	chr1	221503270	-	hs|1q41	NR_024236	chr1:221503329-221503270	NR_024236	Hs.722626
A_23_P37068	24.512	4.61542	24.512	up	TNF receptor-associated factor 3	TRAF3	FALSE	Homo sapiens TNF receptor-associated factor 3 (TRAF3), transcript variant 1, mRNA [NM_145725]	7187	GO:0050688|GO:0005515|GO:0035631|GO:0004842|GO:0034142|GO:0016567|GO:0016874|GO:0031996|GO:0001817|GO:0005829|GO:0005739|GO:0030162|GO:0002756|GO:0032648|GO:0004871|GO:0034138|GO:0032480|GO:0031625|GO:0005164|GO:0019901|GO:0006915|GO:0042981|GO:0032088|GO:0002224|GO:0033209|GO:0007165|GO:0008063|GO:0045087|GO:0009898|GO:0035666|GO:0008270|GO:0005768	103372421	chr14	103372362	+	hs|14q32.32	NM_145725	chr14:103372362-103372421	NM_145725	Hs.510528
A_23_P218807	24.1279	4.59263	24.1279	up	zinc finger CCCH-type containing 7B	ZC3H7B	FALSE	Homo sapiens zinc finger CCCH-type containing 7B (ZC3H7B), mRNA [NM_017590]	23264	GO:0005515|GO:0016032|GO:0005634|GO:0046872	41756016	chr22	41755957	+	hs|22q13.2	NM_017590	chr22:41755957-41756016	NM_017590	Hs.592188
A_19_P00315826	23.8891	4.57828	23.8891	up	MIR181A1 host gene (non-protein coding)	MIR181A1HG	FALSE	MIR181A1 host gene (non-protein coding) [Source:HGNC Symbol;Acc:48659] [ENST00000436880]	100131234		198867710	chr1	198867651	-	hs|1q32.1		chr1:198867710-198867651		Hs.711077
A_23_P214079	23.8852	4.57805	23.8852	up	serine peptidase inhibitor, Kazal type 1	SPINK1	FALSE	Homo sapiens serine peptidase inhibitor, Kazal type 1 (SPINK1), mRNA [NM_003122]	6690	GO:0010751|GO:0005515|GO:0060046|GO:0004866|GO:0004867|GO:0050732|GO:1900004|GO:0005576|GO:2001256|GO:0090281	147207585	chr5	147204211	-	hs|5q32	NM_003122	chr5:147207585-147204211	NM_003122	Hs.407856
A_32_P224666	23.6972	4.56664	23.6972	up	capping protein (actin filament) muscle Z-line, alpha 2	CAPZA2	FALSE	Homo sapiens capping protein (actin filament) muscle Z-line, alpha 2 (CAPZA2), mRNA [NM_006136]	830	GO:0030036|GO:0006928|GO:0003779|GO:0005576|GO:0015629|GO:0005829|GO:0051693|GO:0006461|GO:0016020|GO:0007596|GO:0045087|GO:0071203|GO:0008290|GO:0030863|GO:0070062	116558580	chr7	116558522	+	hs|7q31.2	NM_006136	chr7:116558522-116558580	NM_006136	Hs.446123
A_33_P3334037	23.5995	4.56068	23.5995	up	WW domain binding protein 11	WBP11	FALSE	Homo sapiens WW domain binding protein 11 (WBP11), mRNA [NM_016312]	51729	GO:0008599|GO:0008380|GO:0006397|GO:0005515|GO:0050790|GO:0005737|GO:0016607|GO:0003697|GO:0050699|GO:0006364|GO:0005730|GO:0005634	128007862	chr2	128007803	+	hs|2q14.3	NM_016312	chr2:128007803-128007862	NM_016312	Hs.655138
A_33_P3379775	23.558	4.55815	23.558	up	transducin-like enhancer of split 1 (E(sp1) homolog, Drosophila)	TLE1	FALSE	transducin-like enhancer of split 1 (E(sp1) homolog, Drosophila) [Source:HGNC Symbol;Acc:11837] [ENST00000376463]	7088	GO:0005515|GO:0005667|GO:0001106|GO:0030178|GO:0005730|GO:0007275|GO:0005634|GO:0000122|GO:2000811|GO:0006351|GO:0005829|GO:0010628|GO:0007165|GO:0005737|GO:0007219|GO:0003682|GO:0009887|GO:0005654|GO:0016055|GO:0045892|GO:0043124|GO:0008134	84248423	chr9	84248384	-	hs|9q21.32		chr9:84248423-84248384
A_33_P3278220	23.4851	4.55367	23.4851	up	Rab9 effector protein with kelch motifs	RABEPK	FALSE	Rab9 effector protein with kelch motifs [Source:HGNC Symbol;Acc:16896] [ENST00000373544]	10244	GO:0005886|GO:0010008|GO:0006898|GO:0043231|GO:0006904|GO:0005768	127984666	chr9	127984607	+	hs|9q33.3	AL832249	chr9:127984607-127984666		Hs.19012
A_33_P3279456	22.8562	4.51452	22.8562	up			FALSE				42077385	chr2	42077326	-	hs|2p21		chr2:042077385-042077326
A_33_P3390753	22.8507	4.51417	22.8507	up			FALSE				46606696	chr16	46606637	+	hs|16q11.2		chr16:046606637-046606696
A_33_P3340769	22.846	4.51387	22.846	up	ADAM metallopeptidase domain 9	ADAM9	FALSE	Homo sapiens ADAM metallopeptidase domain 9 (ADAM9), transcript variant 1, mRNA [NM_003816]	8754	GO:0005515|GO:0042542|GO:0051044|GO:0033627|GO:0017124|GO:0051549|GO:0005518|GO:0050714|GO:0051088|GO:0005615|GO:0010042|GO:0016323|GO:0005737|GO:0000186|GO:0022617|GO:0030198|GO:0005080|GO:0030574|GO:0007179|GO:0006509|GO:0007155|GO:0034241|GO:0009986|GO:0033630|GO:0051384|GO:0033631|GO:0031233|GO:0051592|GO:0071222|GO:0005178|GO:0007160|GO:0042117|GO:0007229|GO:0030216|GO:0034616|GO:0043236|GO:…	38962777	chr8	38962718	+	hs|8p11.22	NM_003816	chr8:38962718-38962777	NM_003816	Hs.591852
A_33_P3347477	22.8012	4.51104	22.8012	up			FALSE	DA375949 BRTHA2 Homo sapiens cDNA clone BRTHA2007423 5', mRNA sequence [DA375949]			131747657	chr11	131747598	-	hs|11q25	DA375949	chr11:131747657-131747598		Hs.576925
A_33_P3342822	22.7054	4.50496	22.7054	up	glucoside xylosyltransferase 1 pseudogene 3	GXYLT1P3	FALSE	DKFZp781P0460_r1 781 (synonym: hlcc4) Homo sapiens cDNA clone DKFZp781P0460 5', mRNA sequence [BX646214]	100132541		42494669	chr9	42494610	+	hs|9p12	BX646214	chr9:42494610-42494669		Hs.648146
A_24_P122636	22.4333	4.48757	22.4333	up	3'(2'), 5'-bisphosphate nucleotidase 1	BPNT1	FALSE	Homo sapiens 3'(2'), 5'-bisphosphate nucleotidase 1 (BPNT1), transcript variant 1, mRNA [NM_006085]	10380	GO:0046854|GO:0006139|GO:0008441|GO:0006805|GO:0000287|GO:0050427|GO:0016311|GO:0044281|GO:0070062|GO:0007399|GO:0005829|GO:0004441	220231157	chr1	220231098	-	hs|1q41	NM_006085	chr1:220231157-220231098	NM_006085	Hs.406134
A_32_P73452	22.2634	4.4766	22.2634	up	anoctamin 8	ANO8	FALSE	Homo sapiens anoctamin 8 (ANO8), mRNA [NM_020959]	57719	GO:0005622|GO:0006821|GO:0034220|GO:0005886|GO:0005229|GO:0016021|GO:0055085	17434100	chr19	17434041	-	hs|19p13.11	NM_020959	chr19:17434100-17434041	NM_020959	Hs.590990
A_24_P329487	22.2374	4.47492	22.2374	up	family with sequence similarity 84, member B	FAM84B	FALSE	Homo sapiens family with sequence similarity 84, member B (FAM84B), mRNA [NM_174911]	157638	GO:0005515|GO:0005737|GO:0005886	127564939	chr8	127564880	-	hs|8q24.21	NM_174911	chr8:127564939-127564880	NM_174911	Hs.741352
A_23_P407840	21.9336	4.45507	21.9336	up	fibronectin type III domain containing 1	FNDC1	FALSE	Homo sapiens fibronectin type III domain containing 1 (FNDC1), mRNA [NM_032532]	84624	GO:0031966|GO:0005886|GO:0005911|GO:0005730|GO:0001934|GO:0071456|GO:0010666|GO:0005634|GO:0005576|GO:0051223	159692763	chr6	159692704	+	hs|6q25.3	NM_032532	chr6:159692704-159692763	NM_032532	Hs.520525
A_32_P158746	21.8822	4.45169	21.8822	up	ribosomal protein L17	RPL17	FALSE	Homo sapiens ribosomal protein L17 (RPL17), transcript variant 1, mRNA [NM_000985]	6139	GO:0010467|GO:0003735|GO:0016070|GO:0016071|GO:0019083|GO:0006614|GO:0019058|GO:0005634|GO:0006415|GO:0006412|GO:0006413|GO:0005829|GO:0006414|GO:0000184|GO:0016032|GO:0022625|GO:0044267	47016870	chr18	47015908	-	hs|18q21.1	NM_000985	chr18:47016870-47015908	NM_000985	Hs.374588
A_23_P429449	21.8586	4.45013	21.8586	up	naked cuticle homolog 1 (Drosophila)	NKD1	FALSE	Homo sapiens naked cuticle homolog 1 (Drosophila) (NKD1), mRNA [NM_033119]	85407	GO:0001754|GO:0005515|GO:0045732|GO:0005886|GO:0005509|GO:2000096|GO:0000159|GO:0090249|GO:0030165|GO:0007525|GO:0005737|GO:0016055|GO:0090090	50667944	chr16	50667885	+	hs|16q12.1	NM_033119	chr16:50667885-50667944	NM_033119	Hs.187578
A_24_P76666	21.5059	4.42666	21.5059	up	casein kinase 2, alpha 1 polypeptide	CSNK2A1	FALSE	Homo sapiens casein kinase 2, alpha 1 polypeptide (CSNK2A1), transcript variant 1, mRNA [NM_177559]	1457	GO:0005515|GO:0008284|GO:0045732|GO:0005886|GO:0030307|GO:0051879|GO:0030177|GO:0005634|GO:0005829|GO:0016581|GO:0007411|GO:0016580|GO:0071174|GO:0016055|GO:0043154|GO:0031519|GO:0006355|GO:0005524|GO:0006351|GO:0007165|GO:0047485|GO:0061077|GO:0004674|GO:0006468|GO:0048511|GO:0000278	469405	chr20	469346	-	hs|20p13	NM_177559	chr20:469405-469346	NM_177559	Hs.644056
A_24_P726336	21.5001	4.42627	21.5001	up	phosphatase and actin regulator 2	PHACTR2	FALSE	Homo sapiens phosphatase and actin regulator 2 (PHACTR2), transcript variant 1, mRNA [NM_001100164]	9749	GO:0005515|GO:0004864|GO:0003779|GO:0043086	144151931	chr6	144151872	+	hs|6q24.2	NM_001100164	chr6:144151872-144151931	NM_001100164	Hs.102471
A_24_P384200	21.2738	4.41101	21.2738	up			FALSE				174555262	chr4	174555201	-	hs|4q34.1		chr4:174555262-174555201
A_33_P3255046	21.1507	4.40263	21.1507	up			FALSE				27312321	chr1	27312262	-	hs|1p36.11		chr1:027312321-027312262
A_23_P127013	21.1154	4.40022	21.1154	up	transcription factor 7-like 2 (T-cell specific, HMG-box)	TCF7L2	FALSE	Homo sapiens transcription factor 7-like 2 (T-cell specific, HMG-box) (TCF7L2), transcript variant 2, mRNA [NM_030756]	6934	GO:0005515|GO:0000790|GO:0003700|GO:0008013|GO:0044212|GO:0045599|GO:0010909|GO:0032993|GO:0030538|GO:0045444|GO:0032024|GO:0001103|GO:0045295|GO:0019901|GO:0000122|GO:0000978|GO:0048641|GO:0007420|GO:0005654|GO:0043588|GO:0045892|GO:0008134|GO:0008283|GO:0021983|GO:0048699|GO:0035257|GO:0005634|GO:0030282|GO:0035411|GO:0043433|GO:0044334|GO:0032092|GO:0046827|GO:0030514|GO:0005737|GO:0045944|GO:…	114926037	chr10	114925978	+	hs|10q25.3	NM_030756	chr10:114925978-114926037	NM_030756	Hs.593995
A_23_P385500	21.0531	4.39596	21.0531	up	ring finger protein 166	RNF166	FALSE	Homo sapiens ring finger protein 166 (RNF166), transcript variant 1, mRNA [NM_178841]	115992	GO:0008270	88763431	chr16	88763372	-	hs|16q24.3	NM_178841	chr16:88763431-88763372	NM_178841	Hs.513804
A_33_P3281036	20.9759	4.39066	20.9759	up	HLA complex group 11 (non-protein coding)	HCG11	FALSE	Homo sapiens HLA complex group 11 (non-protein coding) (HCG11), long non-coding RNA [NR_026790]	493812		26527558	chr6	26527499	+	hs|6p22.2	NR_026790	chr6:26527499-26527558	NR_026790	Hs.272939
A_33_P3294524	20.8536	4.38223	20.8536	up	ankyrin repeat domain 12	ANKRD12	FALSE	Homo sapiens ankyrin repeat domain 12 (ANKRD12), transcript variant 3, mRNA [NM_001204056]	23253	GO:0005737|GO:0005730|GO:0005634	9255794	chr18	9255735	+	hs|18p11.22	NM_001204056	chr18:9255735-9255794	NM_001204056	Hs.464585
A_24_P623782	20.8427	4.38147	20.8427	up	FSHD region gene 2	FRG2	FALSE	Homo sapiens FSHD region gene 2 (FRG2), transcript variant 2, mRNA [NM_001005217]	448831	GO:0005634	190946047	chr4	190945988	-	hs|4q35.2	NM_001005217	chr4:190946047-190945988	NM_001005217	Hs.626907
A_24_P358245	20.8187	4.37981	20.8187	up	ATPase, class I, type 8B, member 5, pseudogene	ATP8B5P	FALSE	Homo sapiens ATPase, class I, type 8B, member 5, pseudogene (ATP8B5P), transcript variant 2, non-coding RNA [NR_003582]	158381		35450244	chr9	35450183	+	hs|9p13.3	NR_003582	chr9:35450183-35450244	NR_003582	Hs.575661
A_24_P319374	20.8169	4.37968	20.8169	up	glycoprotein A33 (transmembrane)	GPA33	FALSE	Homo sapiens glycoprotein A33 (transmembrane) (GPA33), mRNA [NM_005814]	10223	GO:0005887|GO:0004872|GO:0070062	167022252	chr1	167022193	-	hs|1q24.1	NM_005814	chr1:167022252-167022193	NM_005814	Hs.651244
A_23_P329768	20.5785	4.36307	20.5785	up	growth regulation by estrogen in breast cancer 1	GREB1	FALSE	Homo sapiens growth regulation by estrogen in breast cancer 1 (GREB1), transcript variant a, mRNA [NM_014668]	9687	GO:0016021	11782739	chr2	11782680	+	hs|2p25.1	NM_014668	chr2:11782680-11782739	NM_014668	Hs.467733
A_19_P00811533	20.5032	4.35777	20.5032	up	SLC2A1 antisense RNA 1	SLC2A1-AS1	FALSE	Homo sapiens SLC2A1 antisense RNA 1 (SLC2A1-AS1), long non-coding RNA [NR_033967]	440584		43448978	chr1	43448919	+	hs|1p34.2	NR_033967	chr1:43448919-43448978	NR_033967	Hs.260928
A_24_P606663	20.4118	4.35133	20.4118	up			FALSE				54724363	chr7	54724304	+	hs|7p11.2		chr7:054724304-054724363
A_32_P148345	20.3677	4.34821	20.3677	up	annexin A2	ANXA2	FALSE	Homo sapiens annexin A2 (ANXA2), transcript variant 2, mRNA [NM_001002857]	302	GO:0005515|GO:0008092|GO:0048471|GO:0072661|GO:0031340|GO:0051290|GO:0005634|GO:0048146|GO:0006900|GO:0005765|GO:0005615|GO:0035749|GO:0005544|GO:0044354|GO:0030199|GO:0005938|GO:0070062|GO:0043220|GO:0005811|GO:0007589|GO:0042470|GO:0017137|GO:0009986|GO:0005509|GO:0051099|GO:0005546|GO:0030496|GO:0001525|GO:0019834|GO:0043086|GO:0001726|GO:0005604|GO:0042383|GO:0031012|GO:0044548|GO:0043234|GO:…	60639647	chr15	60639588	-	hs|15q22.2	NM_001002857	chr15:60639647-60639588	NM_001002857	Hs.511605
A_24_P89971	20.0884	4.32829	20.0884	up	surfeit 4	SURF4	FALSE	Homo sapiens surfeit 4 (SURF4), transcript variant 1, mRNA [NM_033161]	6836	GO:0010638|GO:0005515|GO:0005793|GO:0000139|GO:0034498|GO:0033116|GO:0007030|GO:0005789|GO:0032527|GO:0016021	136228402	chr9	136228343	-	hs|9q34.2	NM_033161	chr9:136228402-136228343	NM_033161	Hs.512465
A_23_P301304	19.8603	4.31182	19.8603	up	fibroblast growth factor receptor 1	FGFR1	FALSE	Homo sapiens fibroblast growth factor receptor 1 (FGFR1), transcript variant 1, mRNA [NM_023110]	2260	GO:0060045|GO:0005515|GO:0001657|GO:0007605|GO:0048705|GO:0001759|GO:0042803|GO:0042802|GO:0046777|GO:0007173|GO:0007411|GO:0000165|GO:0002062|GO:0048339|GO:0042472|GO:0017134|GO:0010518|GO:0014068|GO:0018108|GO:0000122|GO:0045787|GO:0001701|GO:0043235|GO:0001501|GO:0005887|GO:0008543|GO:0045087|GO:0010976|GO:0045595|GO:0060484|GO:0038095|GO:0060445|GO:0008286|GO:0008284|GO:0021847|GO:0005886|GO:…	38270529	chr8	38270470	-	hs|8p11.23	NM_023110	chr8:38270529-38270470	NM_023110	Hs.264887
A_33_P3293524	19.7831	4.30619	19.7831	up	neuralized E3 ubiquitin protein ligase 1	NEURL1	FALSE	Homo sapiens neuralized E3 ubiquitin protein ligase 1 (NEURL1), mRNA [NM_004210]	9148	GO:0090129|GO:0004842|GO:0048471|GO:0008285|GO:0006513|GO:0030054|GO:0005886|GO:0007288|GO:0016874|GO:0051491|GO:0045183|GO:0071230|GO:0007219|GO:0043197|GO:0045211|GO:0043204|GO:0060999|GO:0045746|GO:0043065|GO:0045741|GO:0014069|GO:0030317|GO:0006417|GO:0007399|GO:0007595|GO:0007519|GO:0007420|GO:0008270|GO:0048170	105352302	chr10	105352243	+	hs|10q24.33	NM_004210	chr10:105352243-105352302	NM_004210	Hs.594708
A_24_P285501	19.3674	4.27556	19.3674	up	ubiquitin protein ligase E3 component n-recognin 3 (putative)	UBR3	FALSE	Homo sapiens ubiquitin protein ligase E3 component n-recognin 3 (putative) (UBR3), mRNA [NM_172070]	130507	GO:0007608|GO:0006511|GO:0004842|GO:0016567|GO:0001967|GO:0042048|GO:0016874|GO:0008270|GO:0016021|GO:0009790|GO:0001701	170940210	chr2	170940151	+	hs|2q31.1	NM_172070	chr2:170940151-170940210	NM_172070	Hs.379548
A_33_P3282688	19.3569	4.27478	19.3569	up	uncharacterized LOC100130027	LOC100130027	FALSE	Homo sapiens cDNA FLJ45292 fis, clone BRHIP3002931. [AK127225]	100130027		146032346	chr8	146032287	-	hs|8q24.3	AK127225	chr8:146032346-146032287		Hs.639618
A_33_P3212394	19.3009	4.27059	19.3009	up	FSHD region gene 2 family, member C	FRG2C	FALSE	Homo sapiens FSHD region gene 2 family, member C (FRG2C), mRNA [NM_001124759]	100288801	GO:0005634	75715890	chr3	75715831	+	hs|3p12.3	NM_001124759	chr3:75715831-75715890	NM_001124759	Hs.274541
A_23_P46936	19.2122	4.26395	19.2122	up	early growth response 2	EGR2	FALSE	Homo sapiens early growth response 2 (EGR2), transcript variant 1, mRNA [NM_000399]	1959	GO:0005515|GO:0008219|GO:0003700|GO:0044212|GO:0006366|GO:0016874|GO:0005634|GO:0035914|GO:0046872|GO:0014037|GO:0005737|GO:0071371|GO:0021660|GO:0030278|GO:0048168|GO:0045944|GO:0035284|GO:0006611|GO:0007611|GO:0045444|GO:0031625|GO:0001102|GO:0032868|GO:0043066|GO:0042552|GO:0016925|GO:0021666|GO:0008045|GO:0007420|GO:0003682|GO:0007422|GO:0071837|GO:0007622|GO:0071320|GO:0045893|GO:0021612	64571909	chr10	64571850	-	hs|10q21.3	NM_000399	chr10:64571909-64571850	NM_000399	Hs.1395
A_24_P884376	18.954	4.24443	18.954	up			FALSE				45854838	chr7	45854779	+	hs|7p12.3	TCONS_l2_00025849	chr7:45854779-45854838
A_23_P133648	18.7747	4.23072	18.7747	up	family with sequence similarity 8, member A1	FAM8A1	FALSE	Homo sapiens family with sequence similarity 8, member A1 (FAM8A1), mRNA [NM_016255]	51439	GO:0016021	17611474	chr6	17611415	+	hs|6p22.3	NM_016255	chr6:17611415-17611474	NM_016255	Hs.95260
A_24_P186065	18.6033	4.21749	18.6033	up	dihydrofolate reductase-like 1	DHFRL1	FALSE	Homo sapiens dihydrofolate reductase-like 1 (DHFRL1), transcript variant 2, mRNA [NM_176815]	200895	GO:0050661|GO:0005743|GO:0046105|GO:0003729|GO:0009165|GO:0005739|GO:0005759|GO:0046653|GO:0046654|GO:0006545|GO:0006730|GO:0004146|GO:0055114	93777204	chr3	93777145	-	hs|3q11.1	NM_176815	chr3:93777204-93777145	NM_176815	Hs.718516
A_24_P324405	18.519	4.21094	18.519	up	ankyrin repeat domain 11	ANKRD11	FALSE	Homo sapiens ankyrin repeat domain 11 (ANKRD11), transcript variant 2, mRNA [NM_013275]	29123	GO:0060348|GO:0005737|GO:0060325|GO:0035264|GO:0005886|GO:0001894|GO:0005730|GO:0048705|GO:0042475|GO:0005634|GO:0001701	89349843	chr16	89349784	-	hs|16q24.3	NM_013275	chr16:89349843-89349784	NM_013275	Hs.740440
A_24_P48627	18.1627	4.18291	18.1627	up	protein inhibitor of activated STAT, 4	PIAS4	FALSE	protein inhibitor of activated STAT, 4 [Source:HGNC Symbol;Acc:17002] [ENST00000262971]	51588	GO:0005515|GO:0016925|GO:0005730|GO:0032088|GO:0005634|GO:0000122|GO:0003677|GO:0006351|GO:0016363|GO:0005737|GO:0016605|GO:0019789|GO:0033235|GO:0008270|GO:0016055|GO:0045892|GO:0031625	4039383	chr19	4039324	+	hs|19p13.3	AK022481	chr19:4039324-4039383		Hs.105779
A_23_P102058	18.0858	4.17678	18.0858	up	matrilin 3	MATN3	FALSE	Homo sapiens matrilin 3 (MATN3), mRNA [NM_002381]	4148	GO:0005515|GO:0001501|GO:0030198|GO:0005578|GO:0005576|GO:0005201	20192429	chr2	20192370	-	hs|2p24.1	NM_002381	chr2:20192429-20192370	NM_002381	Hs.656199
A_23_P15146	17.8566	4.15839	17.8566	up	interleukin 32	IL32	FALSE	Homo sapiens interleukin 32 (IL32), transcript variant 1, mRNA [NM_001012631]	9235	GO:0005515|GO:0006955|GO:0006952|GO:0007155|GO:0005615|GO:0005125	3119367	chr16	3119308	+	hs|16p13.3	NM_001012631	chr16:3119308-3119367	NM_001012631	Hs.943
A_23_P314115	17.085	4.09466	17.085	up	BMI1 polycomb ring finger oncogene	BMI1	FALSE	Homo sapiens BMI1 polycomb ring finger oncogene (BMI1), mRNA [NM_005180]	648	GO:0035102|GO:0005515|GO:0010468|GO:0030097|GO:0031519|GO:0007379|GO:0000151|GO:0005634|GO:0048146|GO:0000122|GO:0006351|GO:0005737|GO:0051443|GO:0005654|GO:0008270|GO:0071535|GO:0016568	22619636	chr10	22619577	+	hs|10p12.2	NM_005180	chr10:22619577-22619636	NM_005180	Hs.380403
A_33_P3249002	16.7334	4.06466	16.7334	up			FALSE				109868188	chr2	109868129	+	hs|2q12.3		chr2:109868129-109868188
A_19_P00800199	16.6447	4.057	16.6447	up			FALSE				192909918	chr1	192909859	-	hs|1q31.2		chr1:192909918-192909859
A_33_P3268343	16.6345	4.0561	16.6345	up	phosphoglycerate mutase family member 4	PGAM4	FALSE	Homo sapiens phosphoglycerate mutase family member 4 (PGAM4), mRNA [NM_001029891]	441531	GO:0004082|GO:0004083|GO:0016311|GO:0097228|GO:0004619|GO:0006096	77223520	chrX	77223461	-	hs|Xq21.1	NM_001029891	chrX:77223520-77223461	NM_001029891	Hs.632822
A_23_P144843	16.583	4.05164	16.583	up	endothelial cell-specific molecule 1	ESM1	FALSE	Homo sapiens endothelial cell-specific molecule 1 (ESM1), transcript variant 1, mRNA [NM_007036]	11082	GO:0008284|GO:0005178|GO:0005576|GO:0002040|GO:0001525|GO:0005171|GO:0001558|GO:0005520	54274617	chr5	54274558	-	hs|5q11.2	NM_007036	chr5:54274617-54274558	NM_007036	Hs.129944
A_19_P00322058	16.168	4.01507	16.168	up	long intergenic non-protein coding RNA 1013	LINC01013	FALSE	Homo sapiens long intergenic non-protein coding RNA 1013 (LINC01013), long non-coding RNA [NR_038981]	100507254		132490309	chr6	132490250	+	hs|6q23.2		chr6:132490250-132490309	NR_038981	Hs.103070
A_23_P215060	16.0383	4.00345	16.0383	up	podocalyxin-like	PODXL	FALSE	Homo sapiens podocalyxin-like (PODXL), transcript variant 1, mRNA [NM_001018111]	5420	GO:0005515|GO:0022408|GO:0030335|GO:0072015|GO:0005886|GO:0032534|GO:0031528|GO:0030175|GO:0050900|GO:0033634|GO:0001726|GO:0005615|GO:0044297|GO:0030027|GO:0072175|GO:0005737|GO:0007162|GO:0016324|GO:0016477|GO:0005887|GO:0036057|GO:0045121|GO:0007155|GO:0070062	131185194	chr7	131185135	-	hs|7q32.3	NM_001018111	chr7:131185194-131185135	NM_001018111	Hs.744213
A_24_P83544	15.8873	3.9898	15.8873	up			FALSE	GB			10216439	chr10	10216380	+	hs|10p14		chr10:010216380-010216439
A_19_P00811420	15.709	3.97352	15.709	up			FALSE				15450824	chr21	15450765	+	hs|21q11.2		chr21:015450765-015450824
A_19_P00804666	15.5718	3.96086	15.5718	up			FALSE				57771540	chr19	57771481	-	hs|19q13.43		chr19:057771540-057771481
A_33_P3392052	15.5279	3.95679	15.5279	up	chromosome 5 open reading frame 46	C5orf46	FALSE	Homo sapiens chromosome 5 open reading frame 46 (C5orf46), mRNA [NM_206966]	389336	GO:0008150|GO:0003674|GO:0070062	147272331	chr5	147272272	-	hs|5q32	NM_206966	chr5:147272331-147272272	NM_206966	Hs.660038
A_33_P3391578	15.3891	3.94383	15.3891	up	ribosomal protein L23a pseudogene 64	RPL23AP64	FALSE	Homo sapiens ribosomal protein L23a pseudogene 64 (RPL23AP64), non-coding RNA [NR_003040]	649946		118873886	chr11	118873827	-	hs|11q23.3	NR_003040	chr11:118873886-118873827	NR_003040	Hs.647213
A_23_P416395	15.15	3.92125	15.15	up	stanniocalcin 2	STC2	FALSE	Homo sapiens stanniocalcin 2 (STC2), mRNA [NM_003714]	8614	GO:0005794|GO:0005783|GO:0007566|GO:0007584|GO:0006874|GO:0007267|GO:0071456|GO:0043434|GO:0033280|GO:2001256|GO:0005615|GO:0030968|GO:0046697|GO:0005179|GO:0040015|GO:0006979|GO:0007166	172742046	chr5	172741987	-	hs|5q35.1	NM_003714	chr5:172742046-172741987	NM_003714	Hs.233160
A_24_P411815	15.0863	3.91516	15.0863	up	M-phase specific PLK1 interacting protein	MPLKIP	FALSE	Homo sapiens M-phase specific PLK1 interacting protein (MPLKIP), mRNA [NM_138701]	136647	GO:0005515|GO:0007067|GO:0005813|GO:0005737|GO:0030496|GO:0005634	40172832	chr7	40172773	-	hs|7p14.1	NM_138701	chr7:40172832-40172773	NM_138701	Hs.654989
A_24_P82630	15.0496	3.91165	15.0496	up	structural maintenance of chromosomes flexible hinge domain containing 1	SMCHD1	FALSE	Homo sapiens structural maintenance of chromosomes flexible hinge domain containing 1 (SMCHD1), mRNA [NM_015295]	23347	GO:0001740|GO:0051276|GO:0060821|GO:0005524	2804812	chr18	2804753	+	hs|18p11.32	NM_015295	chr18:2804753-2804812	NM_015295	Hs.8118
A_32_P223189	15.0298	3.90976	15.0298	up	SUMO1 pseudogene 3 (functional)	SUMO1P3	FALSE	Homo sapiens SUMO1 pseudogene 3 (functional) (SUMO1P3), non-coding RNA [NR_002190]	474338		160287491	chr1	160287432	+	hs|1q23.2	NR_002190	chr1:160287432-160287491	NR_002190	Hs.621179
A_33_P3234410	15.0226	3.90906	15.0226	up			FALSE	HUMRPL18A ribosomal protein L18 {Homo sapiens} (exp=-1; wgp=0; cg=0), partial (71%) [THC2587207]			3546314	chr16	3546255	+	hs|16p13.3		chr16:003546255-003546314
A_24_P141707	14.9986	3.90676	14.9986	up	inhibin, beta E	INHBE	FALSE	Homo sapiens inhibin, beta E (INHBE), mRNA [NM_031479]	83729	GO:0005179|GO:0005576|GO:0040007|GO:0008083	57850923	chr12	57850864	+	hs|12q13.3	NM_031479	chr12:57850864-57850923	NM_031479	Hs.632713
A_24_P83922	14.9775	3.90473	14.9775	up	small nuclear ribonucleoprotein polypeptide C	SNRPC	FALSE	Homo sapiens small nuclear ribonucleoprotein polypeptide C (SNRPC), transcript variant 1, mRNA [NM_003093]	6631	GO:0071004|GO:0005515|GO:0030619|GO:0003727|GO:0015030|GO:0005730|GO:0005634|GO:0000387|GO:0003729|GO:0042803|GO:0000395|GO:0000398|GO:0008270|GO:0000243|GO:0005685	34730453	chr6	34730394	+	hs|6p21.31	NM_003093	chr6:34730394-34730453	NM_003093	Hs.1063
A_23_P121586	14.9733	3.90432	14.9733	up	HECT and RLD domain containing E3 ubiquitin protein ligase 3	HERC3	FALSE	Homo sapiens HECT and RLD domain containing E3 ubiquitin protein ligase 3 (HERC3), transcript variant 1, mRNA [NM_014606]	8916	GO:0004842|GO:0042787|GO:0016874|GO:0016023|GO:0005634	89629488	chr4	89629429	+	hs|4q22.1	NM_014606	chr4:89629429-89629488	NM_014606	Hs.35804
A_23_P105251	14.9371	3.90083	14.9371	up	GLI family zinc finger 1	GLI1	FALSE	Homo sapiens GLI family zinc finger 1 (GLI1), transcript variant 1, mRNA [NM_005269]	2735	GO:0005515|GO:0008017|GO:0008284|GO:0006366|GO:0044212|GO:0030324|GO:0003705|GO:0021696|GO:0021983|GO:0005634|GO:0009954|GO:0007283|GO:0009953|GO:0046872|GO:0007224|GO:0005829|GO:0043231|GO:0045880|GO:0005737|GO:0045944|GO:0090090|GO:0060032|GO:0021938|GO:0045740|GO:0005730|GO:0072372|GO:0048546|GO:0003677|GO:0001649|GO:0007418|GO:0009913|GO:0008589|GO:0003682|GO:0045893	57866030	chr12	57865971	+	hs|12q13.3	NM_005269	chr12:57865971-57866030	NM_005269	Hs.632702
A_23_P23873	14.8624	3.8936	14.8624	up	pappalysin 2	PAPPA2	FALSE	Homo sapiens pappalysin 2 (PAPPA2), transcript variant 1, mRNA [NM_020318]	60676	GO:0005622|GO:0016020|GO:0006508|GO:0008270|GO:0005576|GO:0044267|GO:0001558|GO:0030154|GO:0008237|GO:0070062	176811823	chr1	176811764	+	hs|1q25.2	NM_020318	chr1:176811764-176811823	NM_020318	Hs.187284
A_24_P197964	14.8338	3.89082	14.8338	up	tripartite motif containing 14	TRIM14	FALSE	Homo sapiens tripartite motif containing 14 (TRIM14), transcript variant 1, mRNA [NM_014788]	9830	GO:0005622|GO:0003674|GO:0051091|GO:0005737|GO:0051092|GO:0045087|GO:0032897|GO:0008270	100846713	chr9	100846654	-	hs|9q22.33	NM_014788	chr9:100846713-100846654	NM_014788	Hs.575631
A_24_P175909	14.8186	3.88933	14.8186	up	methionyl-tRNA synthetase	MARS	FALSE	Homo sapiens methionyl-tRNA synthetase (MARS), mRNA [NM_004990]	4141	GO:0005739|GO:0010467|GO:0005737|GO:0000049|GO:0006431|GO:0004825|GO:0005524|GO:0070062|GO:0006418|GO:0005829	57910432	chr12	57910373	+	hs|12q13.3	NM_004990	chr12:57910373-57910432	NM_004990	Hs.632707
A_33_P3288684	14.706	3.87833	14.706	up			FALSE				68175482	chr9	68175423	-	hs|9q13		chr9:068175482-068175423
A_23_P165624	14.6954	3.87729	14.6954	up	tumor necrosis factor, alpha-induced protein 6	TNFAIP6	FALSE	Homo sapiens tumor necrosis factor, alpha-induced protein 6 (TNFAIP6), mRNA [NM_007115]	7130	GO:0007165|GO:0006954|GO:0005540|GO:0007267|GO:0007155	152226654	chr2	152226595	+	hs|2q23.3	NM_007115	chr2:152226595-152226654	NM_007115	Hs.437322
A_33_P3333648	14.6682	3.87462	14.6682	up	olfactory receptor, family 51, subfamily I, member 2	OR51I2	FALSE	Homo sapiens olfactory receptor, family 51, subfamily I, member 2 (OR51I2), mRNA [NM_001004754]	390064	GO:0050911|GO:0007608|GO:0004984|GO:0007186|GO:0005886|GO:0004930|GO:0016021	5475397	chr11	5475338	+	hs|11p15.4	NM_001004754	chr11:5475338-5475397	NM_001004754	Hs.553733
A_23_P329835	14.6526	3.87309	14.6526	up	ubiquitously transcribed tetratricopeptide repeat containing, Y-linked	UTY	FALSE	Homo sapiens ubiquitously transcribed tetratricopeptide repeat containing, Y-linked (UTY), transcript variant 3, mRNA [NM_007125]	7404	GO:0007507|GO:0070544|GO:0031935|GO:0086003|GO:0005634|GO:0000978|GO:0060070|GO:0001701|GO:0051864|GO:0046872|GO:0055114|GO:0045184	15360641	chrY	15360582	-	hs|Yq11.221	NM_007125	chrY:15360641-15360582	NM_007125	Hs.115277
A_19_P00801042	14.369	3.84489	14.369	up	zinc finger protein 90	ZNF90	FALSE	zinc finger protein 90 [Source:HGNC Symbol;Acc:13165] [ENST00000469078]	7643	GO:0006355|GO:0003700|GO:0008270|GO:0005634|GO:0003677|GO:0006351	20236346	chr19	20236287	+	hs|19p12	AK298173	chr19:20236287-20236346		Hs.55304
A_33_P3304888	14.3596	3.84394	14.3596	up	ubiquitin specific peptidase 6	USP6	FALSE	Homo sapiens ubiquitin specific peptidase 6 (USP6), mRNA [NM_004505]	9098	GO:0005515|GO:0005516|GO:0006511|GO:0016579|GO:0004843|GO:0005886|GO:0032851|GO:0003676|GO:0005764|GO:0004197|GO:0005737|GO:0060627|GO:0055037|GO:0005097|GO:0006464	5074204	chr17	5074145	+	hs|17p13.2	NM_004505	chr17:5074145-5074204	NM_004505	Hs.448851
A_33_P3412716	14.2997	3.83792	14.2997	up			FALSE				55432954	chr5	55432895	+	hs|5q11.2		chr5:055432895-055432954
A_19_P00812750	14.2787	3.83579	14.2787	up			FALSE				33871985	chr13	33871926	-	hs|13q13.1		chr13:033871985-033871926
A_33_P3413355	14.2639	3.83429	14.2639	up	carbohydrate (keratan sulfate Gal-6) sulfotransferase 1	CHST1	FALSE	Homo sapiens carbohydrate (keratan sulfate Gal-6) sulfotransferase 1 (CHST1), mRNA [NM_003654]	8534	GO:0006790|GO:0005976|GO:0005975|GO:0044281|GO:0042339|GO:0006954|GO:0045130|GO:0000139|GO:0018146|GO:0008146|GO:0016021|GO:0006012|GO:0030203	45670488	chr11	45670429	-	hs|11p11.2	NM_003654	chr11:45670488-45670429	NM_003654	Hs.104576
A_33_P3395636	14.2205	3.8299	14.2205	up			FALSE				64800206	chr7	64800147	-	hs|7q11.21		chr7:064800206-064800147
A_24_P925635	14.1515	3.82288	14.1515	up	septin 7 pseudogene 2	SEPT7P2	FALSE	Homo sapiens septin 7 pseudogene 2 (SEPT7P2), non-coding RNA [NR_024271]	641977		45763450	chr7	45763391	-	hs|7p12.3	NR_024271	chr7:45763450-45763391	NR_024271	Hs.723477
A_24_P412734	14.1049	3.81813	14.1049	up	protease, serine, 36	PRSS36	FALSE	Homo sapiens protease, serine, 36 (PRSS36), transcript variant 1, mRNA [NM_173502]	146547	GO:0005737|GO:0004252|GO:0006508|GO:0005578	31151730	chr16	31151671	-	hs|16p11.2	NM_173502	chr16:31151730-31151671	NM_173502	Hs.256632
A_23_P398854	14.0415	3.81163	14.0415	up	docking protein 7	DOK7	FALSE	Homo sapiens docking protein 7 (DOK7), transcript variant 1, mRNA [NM_173660]	285489	GO:0031594|GO:0030054|GO:0019901|GO:0005886|GO:0007528|GO:0061098|GO:0005158|GO:0043113|GO:0035091	3496205	chr4	3496146	+	hs|4p16.3	NM_173660	chr4:3496146-3496205	NM_173660	Hs.122110
A_24_P24972	13.957	3.80291	13.957	up			FALSE	Q7Z4W8_HUMAN (Q7Z4W8) Heparin-binding protein HBp15, partial (92%) [THC2549395]			110494802	chr2	110494743	-	hs|2q13		chr2:110494802-110494743
A_24_P75456	13.7952	3.78609	13.7952	up			FALSE				28319095	chr7	28319036	-	hs|7p15.1		chr7:028319095-028319036
A_24_P358305	13.7303	3.77929	13.7303	up		XLOC_014512	FALSE	BROAD Institute lincRNA (XLOC_014512), lincRNA [TCONS_l2_00027831]			70042336	chr8	70042275	+	hs|8q13.2		chr8:70042275-70042336
A_24_P301186	13.7066	3.77679	13.7066	up	WD repeat domain 89	WDR89	FALSE	Homo sapiens WD repeat domain 89 (WDR89), transcript variant 1, mRNA [NM_001008726]	112840		64064455	chr14	64064396	-	hs|14q23.2	NM_001008726	chr14:64064455-64064396	NM_001008726	Hs.655666
A_24_P280897	13.6266	3.76836	13.6266	up			FALSE				34080305	chr19	34080246	-	hs|19q13.11		chr19:034080305-034080246
A_24_P219053	13.4433	3.74881	13.4433	up	GPALPP motifs containing 1	GPALPP1	FALSE	GPALPP motifs containing 1 [Source:HGNC Symbol;Acc:20298] [ENST00000497558]	55425		45605890	chr13	45605831	+	hs|13q14.12	AB051491	chr13:45605831-45605890		Hs.744143
A_19_P00321656	13.4263	3.74698	13.4263	up	dimethylarginine dimethylaminohydrolase 1	DDAH1	FALSE	Homo sapiens dimethylarginine dimethylaminohydrolase 1 (DDAH1), transcript variant 2, mRNA [NM_001134445]	23576	GO:0005739|GO:0003073|GO:0007263|GO:0000052|GO:0006527|GO:0003824|GO:0016597|GO:0046872|GO:0045766|GO:0016403|GO:0070062|GO:0045429	85961928	chr1	85961869	-	hs|1p22.3	NM_001134445	chr1:85961928-85961869	NM_001134445	Hs.713411
A_33_P3226610	13.4224	3.74657	13.4224	up	PC4 and SFRS1 interacting protein 1	PSIP1	FALSE	Homo sapiens PC4 and SFRS1 interacting protein 1 (PSIP1), transcript variant 1, mRNA [NM_021144]	11168	GO:0005515|GO:0001105|GO:0006355|GO:0009408|GO:0005730|GO:0035327|GO:0005634|GO:0006351|GO:0005829|GO:0000395|GO:0005720|GO:0097100|GO:0034399|GO:0045944|GO:0003682|GO:0016032|GO:0005654|GO:0033613|GO:0006979	15474127	chr9	15474068	-	hs|9p22.3	NM_021144	chr9:15474127-15474068	NM_021144	Hs.658434
A_24_P349547	13.2322	3.72598	13.2322	up			FALSE				79187482	chr12	79187421	-	hs|12q21.2		chr12:079187482-079187421
A_23_P125042	13.1861	3.72095	13.1861	up	zinc finger protein 222	ZNF222	FALSE	Homo sapiens zinc finger protein 222 (ZNF222), transcript variant 2, mRNA [NM_013360]	7673	GO:0006355|GO:0005634|GO:0003677|GO:0046872|GO:0006351	44536773	chr19	44536717	+	hs|19q13.31	NM_013360	chr19:44536717-44536773	NM_013360	Hs.279840
A_33_P3346826	13.1607	3.71816	13.1607	up	interleukin 32	IL32	FALSE	Homo sapiens interleukin 32 (IL32), transcript variant 4, mRNA [NM_001012633]	9235	GO:0005515|GO:0006955|GO:0006952|GO:0007155|GO:0005615|GO:0005125	3119073	chr16	3119014	+	hs|16p13.3	NM_001012633	chr16:3119014-3119073	NM_001012633	Hs.943
A_33_P3791123	13.1057	3.71212	13.1057	up	ATP synthase, H+ transporting, mitochondrial Fo complex, subunit G2	ATP5L2	FALSE	Homo sapiens ATP synthase, H+ transporting, mitochondrial Fo complex, subunit G2 (ATP5L2), mRNA [NM_001165877]	267020	GO:0015986|GO:0015078|GO:0000276	43035995	chr22	43035936	-	hs|22q13.2	NM_001165877	chr22:43035995-43035936	NM_001165877	Hs.664737
A_32_P178800	13.0429	3.70519	13.0429	up	integrin, alpha 2 (CD49B, alpha 2 subunit of VLA-2 receptor)	ITGA2	FALSE	Homo sapiens integrin, alpha 2 (CD49B, alpha 2 subunit of VLA-2 receptor) (ITGA2), transcript variant 1, mRNA [NM_002203]	3673	GO:0005515|GO:0014070|GO:0005518|GO:0030879|GO:0033591|GO:0014075|GO:0051971|GO:0060100|GO:0001894|GO:0007411|GO:0001618|GO:0030198|GO:0009887|GO:0033343|GO:0008305|GO:0009986|GO:0046982|GO:0014850|GO:0045785|GO:0005178|GO:0031346|GO:0032967|GO:0007229|GO:0010694|GO:0043236|GO:0043388|GO:0009279|GO:0043589|GO:0005925|GO:0009897|GO:0048471|GO:0005886|GO:0008283|GO:0005634|GO:0032870|GO:0046872|GO:…	52389696	chr5	52389637	+	hs|5q11.2	NM_002203	chr5:52389637-52389696	NM_002203	Hs.482077
A_32_P50431	13.012	3.70177	13.012	up	suppression of tumorigenicity 13 (colon carcinoma) (Hsp70 interacting protein)	ST13	FALSE	Homo sapiens suppression of tumorigenicity 13 (colon carcinoma) (Hsp70 interacting protein) (ST13), transcript variant 1, mRNA [NM_003932]	6767	GO:0005515|GO:0032564|GO:0019904|GO:0051087|GO:0061084|GO:0032403|GO:0005829|GO:0042802|GO:0043234|GO:0005737|GO:0070389|GO:0006457|GO:0030544|GO:0051260|GO:0051082|GO:0030674|GO:0070062	41221617	chr22	41221558	-	hs|22q13.2	NM_003932	chr22:41221617-41221558	NM_003932	Hs.712713
A_19_P00325029	12.9932	3.69968	12.9932	up			FALSE				16507028	chrX	16506969	-	hs|Xp22.2		chrX:016507028-016506969
A_32_P82475	12.9557	3.69552	12.9557	up	small nucleolar RNA host gene 10 (non-protein coding)	SNHG10	FALSE	Homo sapiens small nucleolar RNA host gene 10 (non-protein coding) (SNHG10), transcript variant 1, long non-coding RNA [NR_003138]	283596		95999378	chr14	95999319	-	hs|14q32.13	NR_003138	chr14:95999378-95999319	NR_003138	Hs.448753
A_23_P23090	12.9408	3.69386	12.9408	up	phosducin	PDC	FALSE	Homo sapiens phosducin (PDC), transcript variant 1, mRNA [NM_002597]	5132	GO:0001917|GO:0004859|GO:0007186|GO:0005634|GO:0007602|GO:0043086|GO:0007601|GO:0005829|GO:0001750	186413365	chr1	186413306	-	hs|1q31.1	NM_002597	chr1:186413365-186413306	NM_002597	Hs.654381
A_23_P149813	12.8753	3.68654	12.8753	up	Ras suppressor protein 1	RSU1	FALSE	Homo sapiens Ras suppressor protein 1 (RSU1), transcript variant 1, mRNA [NM_012425]	6251	GO:0007165|GO:0034329|GO:0007265|GO:0070062|GO:0005829	16633585	chr10	16633526	-	hs|10p13	NM_012425	chr10:16633585-16633526	NM_012425	Hs.524161
A_23_P52336	12.7757	3.67533	12.7757	up	unc-5 homolog B (C. elegans)	UNC5B	FALSE	Homo sapiens unc-5 homolog B (C. elegans) (UNC5B), transcript variant 1, mRNA [NM_170744]	219699	GO:0005515|GO:0007165|GO:0043524|GO:0043065|GO:0007411|GO:2001240|GO:0006915|GO:0042981|GO:0014068|GO:0016021|GO:0033564	73059656	chr10	73059597	+	hs|10q22.1	NM_170744	chr10:73059597-73059656	NM_170744	Hs.522997
A_33_P3372161	12.7641	3.67402	12.7641	up			FALSE	Q3ZCE3_BOVIN (Q3ZCE3) RPS27A protein (Fragment), partial (94%) [THC2507627]		GO:0005515|GO:0006510|GO:0006511|GO:0006512|GO:0006355|GO:0003735|GO:0042254|GO:0006950|GO:0006325|GO:0005634|GO:0003676|GO:0006412|GO:0005551|GO:0005737|GO:0042787|GO:0005840|GO:0006464	156985410	chr7	156985351	+	hs|7q36.3		chr7:156985351-156985410
A_23_P120227	12.7235	3.66942	12.7235	up	limb bud and heart development	LBH	FALSE	Homo sapiens limb bud and heart development (LBH), mRNA [NM_030915]	81606	GO:0010468|GO:0005737|GO:0030193|GO:0007275|GO:0005634|GO:0045893|GO:0006351	30482530	chr2	30482471	+	hs|2p23.1	NM_030915	chr2:30482471-30482530	NM_030915	Hs.567598
A_24_P329795	12.721	3.66913	12.721	up	chromosome 10 open reading frame 10	C10orf10	FALSE	Homo sapiens chromosome 10 open reading frame 10 (C10orf10), mRNA [NM_007021]	11067	GO:0005739	45471769	chr10	45471710	-	hs|10q11.21	NM_007021	chr10:45471769-45471710	NM_007021	Hs.93675
A_19_P00812701	12.5887	3.65405	12.5887	up			FALSE				5041785	chr6	5041726	+	hs|6p25.1		chr6:005041726-005041785
A_24_P282343	12.5622	3.65102	12.5622	up	cyclin-dependent kinase-like 5	CDKL5	FALSE	Homo sapiens cyclin-dependent kinase-like 5 (CDKL5), transcript variant I, mRNA [NM_003159]	6792	GO:0045773|GO:0005730|GO:0005634|GO:0032587|GO:0032839|GO:0044294|GO:0032855|GO:0005524|GO:0048365|GO:0005737|GO:0007049|GO:0046777|GO:0004672|GO:0004674|GO:0016301|GO:0050775|GO:0050773|GO:0006468|GO:0001764|GO:0004693	18638059	chrX	18638000	+	hs|Xp22.13	NM_003159	chrX:18638000-18638059	NM_003159	Hs.659851
A_19_P00805928	12.5364	3.64805	12.5364	up			FALSE				94969613	chr8	94969554	-	hs|8q22.1		chr8:094969613-094969554
A_23_P357966	12.4854	3.64217	12.4854	up	protein-L-isoaspartate (D-aspartate) O-methyltransferase domain containing 1	PCMTD1	FALSE	Homo sapiens protein-L-isoaspartate (D-aspartate) O-methyltransferase domain containing 1 (PCMTD1), transcript variant 1, mRNA [NM_052937]	115294	GO:0004719|GO:0005737|GO:0006479	52730327	chr8	52730268	-	hs|8q11.23	NM_052937	chr8:52730327-52730268	NM_052937	Hs.671268
A_33_P3259801	12.4781	3.64133	12.4781	up	transmembrane protein 189	TMEM189	FALSE	Homo sapiens transmembrane protein 189 (TMEM189), transcript variant 1, mRNA [NM_199129]	387521	GO:0005789|GO:0016021	48740766	chr20	48740707	-	hs|20q13.13	NM_199129	chr20:48740766-48740707	NM_199129	Hs.744839
A_33_P3420446	12.4574	3.63893	12.4574	up	leucine-rich repeats and death domain containing 1	LRRD1	FALSE	Homo sapiens leucine-rich repeats and death domain containing 1 (LRRD1), mRNA [NM_001161528]	401387	GO:0007165	91774317	chr7	91774258	-	hs|7q21.2	NM_001161528	chr7:91774317-91774258	NM_001161528	Hs.671729
A_24_P941322	12.4112	3.63357	12.4112	up	QKI, KH domain containing, RNA binding	QKI	FALSE	Homo sapiens QKI, KH domain containing, RNA binding (QKI), transcript variant 1, mRNA [NM_006775]	9444	GO:0005515|GO:0006397|GO:0008380|GO:0017124|GO:0042552|GO:0007286|GO:0005634|GO:0006417|GO:0010628|GO:0042692|GO:0005737|GO:0042759|GO:0051028|GO:0001570	163994565	chr6	163994506	+	hs|6q26	NM_006775	chr6:163994506-163994565	NM_006775	Hs.510324
A_19_P00322605	12.3694	3.6287	12.3694	up	long intergenic non-protein coding RNA 1013	LINC01013	FALSE	long intergenic non-protein coding RNA 1013 [Source:HGNC Symbol;Acc:48987] [ENST00000458028]	100507254		132467881	chr6	132467822	+	hs|6q23.2	TCONS_00011190	chr6:132467822-132467881		Hs.103070
A_33_P3334162	12.3532	3.62681	12.3532	up			FALSE				61688113	chr17	61688054	-	hs|17q23.3		chr17:061688113-061688054
A_33_P3372090	12.3343	3.62461	12.3343	up			FALSE				180413050	chr5	180412991	+	hs|5q35.3		chr5:180412991-180413050
A_19_P00321049	12.2582	3.61568	12.2582	up			FALSE				39461783	chr15	39461724	-	hs|15q14		chr15:039461783-039461724
A_33_P3368301	12.2555	3.61536	12.2555	up	bolA family member 3	BOLA3	FALSE	Homo sapiens bolA family member 3 (BOLA3), transcript variant 1, mRNA [NM_212552]	388962	GO:0008150|GO:0003674|GO:0005576|GO:0005575	74362565	chr2	74362528	-	hs|2p13.1		chr2:74362565-74362528	NM_212552	Hs.61472
A_23_P151506	12.2433	3.61392	12.2433	up	pleckstrin 2	PLEK2	FALSE	Homo sapiens pleckstrin 2 (PLEK2), mRNA [NM_016445]	26499	GO:0035556|GO:0005737|GO:0030036|GO:0031258|GO:0005856	67853870	chr14	67853811	-	hs|14q23.3	NM_016445	chr14:67853870-67853811	NM_016445	Hs.170473
A_23_P303260	12.2424	3.61381	12.2424	up	syntaxin 7	STX7	FALSE	Homo sapiens syntaxin 7 (STX7), mRNA [NM_003569]	8417	GO:0005484|GO:0048471|GO:0031901|GO:0000149|GO:0006892|GO:0031201|GO:0016021|GO:0005765|GO:0016079|GO:0006886|GO:0070062|GO:0043231	132781224	chr6	132781165	-	hs|6q23.2	NM_003569	chr6:132781224-132781165	NM_003569	Hs.593148
A_33_P3304293	12.2308	3.61245	12.2308	up	stromal antigen 2	STAG2	FALSE	Homo sapiens stromal antigen 2 (STAG2), transcript variant 3, mRNA [NM_001042751]	10735	GO:0005515|GO:0005886|GO:0005694|GO:0032876|GO:0005730|GO:0005634|GO:0015629|GO:0005829|GO:0007067|GO:0007126|GO:0019827|GO:0007062|GO:0005654|GO:0045111|GO:0000278|GO:0000785|GO:0000775	123159767	chrX	123159708	+	hs|Xq25	NM_001042751	chrX:123159708-123159767	NM_001042751	Hs.496710
A_33_P3281041	12.1842	3.60694	12.1842	up			FALSE	NUD16_HUMAN (Q96DE0) Nucleoside diphosphate-linked moiety X motif 16 (Nudix motif 16) , partial (70%) [THC2710983]			131081391	chr3	131081332	+	hs|3q22.1		chr3:131081332-131081391
A_33_P3520835	12.1216	3.59951	12.1216	up	uncharacterized LOC441441	FLJ41455	FALSE	Homo sapiens cDNA FLJ41455 fis, clone BRSTN2012284. [AK123449]	441441		45447681	chr9	45447622	+	hs|9p11.2	AK123449	chr9:45447622-45447681		Hs.494023
A_33_P3320152	12.0347	3.58913	12.0347	up	small nuclear ribonucleoprotein polypeptide E	SNRPE	FALSE	Homo sapiens small nuclear ribonucleoprotein polypeptide E (SNRPE), mRNA [NM_003094]	6635	GO:0005515|GO:0008380|GO:0006369|GO:0010467|GO:0006366|GO:0003723|GO:0031124|GO:0005634|GO:0071013|GO:0005829|GO:0005683|GO:0030532|GO:0005681|GO:0005687|GO:0005685|GO:0070062|GO:0000245|GO:0042633|GO:0008334|GO:0016070|GO:0034660|GO:0000387|GO:0034709|GO:0000398|GO:0005654|GO:0034715|GO:0005689|GO:0034719	203839108	chr1	203839049	+	hs|1q32.1	NM_003094	chr1:203839049-203839108	NM_003094	Hs.334612
A_32_P191840	12.0159	3.58687	12.0159	up	uncharacterized LOC644662	LOC644662	FALSE	PREDICTED: Homo sapiens uncharacterized LOC644662 (LOC644662), ncRNA [XR_171034]	644662		126010366	chr3	126010307	+	hs|3q21.3	XR_171034	chr3:126010307-126010366	XR_171034	Hs.518222
A_19_P00813282	11.961	3.58027	11.961	up			FALSE				115093121	chr8	115093062	-	hs|8q23.3		chr8:115093121-115093062
A_23_P7727	11.8885	3.5715	11.8885	up	hyaluronan and proteoglycan link protein 1	HAPLN1	FALSE	Homo sapiens hyaluronan and proteoglycan link protein 1 (HAPLN1), mRNA [NM_001884]	1404	GO:0031012|GO:0005540|GO:0030198|GO:0005578|GO:0005576|GO:0007155	82937382	chr5	82937323	-	hs|5q14.3	NM_001884	chr5:82937382-82937323	NM_001884	Hs.2799
A_23_P370479	11.8874	3.57136	11.8874	up	protein O-fucosyltransferase 1	POFUT1	FALSE	Homo sapiens protein O-fucosyltransferase 1 (POFUT1), transcript variant 1, mRNA [NM_015352]	23509	GO:0006355|GO:0005783|GO:0001756|GO:0008417|GO:0046922|GO:0016266|GO:0001525|GO:0009790|GO:0036066|GO:0007399|GO:0007507|GO:0006493|GO:0007219|GO:0016020|GO:0006004	30826294	chr20	30826235	+	hs|20q11.21	NM_015352	chr20:30826235-30826294	NM_015352	Hs.472409
A_32_P420563	11.8222	3.56343	11.8222	up	ring finger protein 215	RNF215	FALSE	Homo sapiens ring finger protein 215 (RNF215), mRNA [NM_001017981]	200312	GO:0008270|GO:0016021	30774868	chr22	30774809	-	hs|22q12.2	NM_001017981	chr22:30774868-30774809	NM_001017981	Hs.592194
A_32_P209624	11.8179	3.56291	11.8179	up	makorin ring finger protein 7, pseudogene	MKRN7P	FALSE	Homo sapiens makorin ring finger protein 7, pseudogene (MKRN7P), non-coding RNA [NR_026640]	7686		45092587	chr20	45092528	-	hs|20q13.12	NR_026640	chr20:45092587-45092528	NR_026640	Hs.717103
A_24_P191664	11.7655	3.55649	11.7655	up	golgi integral membrane protein 4	GOLIM4	FALSE	Homo sapiens golgi integral membrane protein 4 (GOLIM4), mRNA [NM_014498]	27333	GO:0005801|GO:0005794|GO:0005796|GO:0032580|GO:0006810|GO:0005730|GO:0030139|GO:0005634|GO:0016021|GO:0010008	167727993	chr3	167727934	-	hs|3q26.2	NM_014498	chr3:167727993-167727934	NM_014498	Hs.143600
A_24_P388810	11.7455	3.55404	11.7455	up	signal recognition particle 19kDa	SRP19	FALSE	Homo sapiens signal recognition particle 19kDa (SRP19), transcript variant 1, mRNA [NM_003135]	6728	GO:0005786|GO:0010467|GO:0006614|GO:0042493|GO:0006613|GO:0008312|GO:0005730|GO:0005634|GO:0006412|GO:0005829|GO:0005739|GO:0005737|GO:0044267	112203173	chr5	112203114	+	hs|5q22.2	NM_003135	chr5:112203114-112203173	NM_003135	Hs.637001
A_24_P203502	11.7405	3.55342	11.7405	up			FALSE	Q9BS42_HUMAN (Q9BS42) C15orf15 protein, partial (74%) [THC2591331]			55505926	chr18	55505867	+	hs|18q21.31		chr18:055505867-055505926
A_32_P108474	11.6958	3.54792	11.6958	up	ATP-binding cassette, sub-family E (OABP), member 1	ABCE1	FALSE	Homo sapiens ATP-binding cassette, sub-family E (OABP), member 1 (ABCE1), transcript variant 1, mRNA [NM_002940]	6059	GO:0005739|GO:0005737|GO:0051536|GO:0008428|GO:0006200|GO:0016032|GO:0009615|GO:0043086|GO:0016887|GO:0005524|GO:0006401	146048976	chr4	146048917	+	hs|4q31.21	NM_002940	chr4:146048917-146048976	NM_002940	Hs.12013
A_33_P3340757	11.6743	3.54526	11.6743	up			FALSE				131451030	chr2	131450971	-	hs|2q21.1		chr2:131451030-131450971
A_24_P244952	11.6414	3.5412	11.6414	up	SMG1 phosphatidylinositol 3-kinase-related kinase	SMG1	FALSE	Homo sapiens SMG1 phosphatidylinositol 3-kinase-related kinase (SMG1), mRNA [NM_015092]	23049	GO:0005515|GO:0010467|GO:0016070|GO:0016071|GO:0006950|GO:0005634|GO:0005524|GO:0046872|GO:0005829|GO:0046854|GO:0005737|GO:0046777|GO:0004672|GO:0006281|GO:0006406|GO:0018105|GO:0000184|GO:0004674	18816853	chr16	18816794	-	hs|16p12.3	NM_015092	chr16:18816853-18816794	NM_015092	Hs.460179
A_24_P175563	11.4326	3.51508	11.4326	up	acyl-CoA binding domain containing 5	ACBD5	FALSE	Homo sapiens acyl-CoA binding domain containing 5 (ACBD5), transcript variant 1, mRNA [NM_145698]	91452	GO:0008150|GO:0003674|GO:0006810|GO:0005730|GO:0005634|GO:0016021|GO:0000062|GO:0005778|GO:0043231|GO:0008289	27484212	chr10	27484153	-	hs|10p12.1	NM_145698	chr10:27484212-27484153	NM_145698	Hs.530597
A_19_P00808184	11.3516	3.50483	11.3516	up			FALSE				5077119	chr20	5077060	-	hs|20p13		chr20:005077119-005077060
A_23_P115519	11.3203	3.50084	11.3203	up	late cornified envelope 3D	LCE3D	FALSE	Homo sapiens late cornified envelope 3D (LCE3D), mRNA [NM_032563]	84648	GO:0031424	152552017	chr1	152551958	-	hs|1q21.3	NM_032563	chr1:152552017-152551958	NM_032563	Hs.244349
A_24_P402438	11.2717	3.49463	11.2717	up	transforming growth factor, beta 2	TGFB2	FALSE	Homo sapiens transforming growth factor, beta 2 (TGFB2), transcript variant 2, mRNA [NM_003238]	7042	GO:0005515|GO:0008219|GO:0030308|GO:0030307|GO:0001654|GO:0009790|GO:0005615|GO:0042803|GO:0031069|GO:0005114|GO:0007507|GO:0043525|GO:0004702|GO:0030198|GO:0007411|GO:0030199|GO:0043025|GO:0007179|GO:0001942|GO:0023014|GO:0030593|GO:0030168|GO:0014068|GO:0045787|GO:0005160|GO:0005125|GO:0045216|GO:0042637|GO:0010936|GO:0001502|GO:0007184|GO:0042060|GO:0032570|GO:0010002|GO:0016049|GO:0008083|GO:…	218614843	chr1	218614784	+	hs|1q41	NM_003238	chr1:218614784-218614843	NM_003238	Hs.133379
A_24_P11575	11.2119	3.48696	11.2119	up	cysteine rich transmembrane BMP regulator 1 (chordin-like)	CRIM1	FALSE	Homo sapiens cysteine rich transmembrane BMP regulator 1 (chordin-like) (CRIM1), mRNA [NM_016441]	51232	GO:0010951|GO:0005886|GO:0004867|GO:0005010|GO:0048009|GO:0016021|GO:0030165|GO:0001558|GO:0070062|GO:0007399|GO:0005520	36777886	chr2	36777827	+	hs|2p22.2	NM_016441	chr2:36777827-36777886	NM_016441	Hs.699247
A_23_P253350	11.1465	3.47852	11.1465	up	chromosome 8 open reading frame 4	C8orf4	FALSE	Homo sapiens chromosome 8 open reading frame 4 (C8orf4), mRNA [NM_020130]	56892	GO:0006915	40012026	chr8	40011967	+	hs|8p11.21	NM_020130	chr8:40011967-40012026	NM_020130	Hs.591849
A_24_P827037	11.1452	3.47835	11.1452	up	leucine rich repeat containing 15	LRRC15	FALSE	Homo sapiens leucine rich repeat containing 15 (LRRC15), transcript variant 2, mRNA [NM_130830]	131578	GO:0030335|GO:0043236|GO:0005518|GO:0090005|GO:0016021|GO:0001968|GO:0046813|GO:0070062	194076556	chr3	194076497	-	hs|3q29	NM_130830	chr3:194076556-194076497	NM_130830	Hs.288467
A_19_P00321044	11.1238	3.47557	11.1238	up			FALSE				50683067	chr16	50683008	+	hs|16q12.1		chr16:50683008-50683067
A_33_P3427239	11.122	3.47535	11.122	up	uncharacterized LOC100134937	LOC100134937	FALSE	Homo sapiens cDNA clone IMAGE:5263734. [BC035129]	100134937		6987771	chr4	6987712	-	hs|4p16.1	BC035129	chr4:6987771-6987712		Hs.659762
A_19_P00808525	11.0999	3.47248	11.0999	up			FALSE				66504156	chr8	66504097	-	hs|8q13.1		chr8:66504156-66504097
A_33_P3216013	11.0958	3.47194	11.0958	up			FALSE				92706490	chr1	92706431	+	hs|1p22.1		chr1:092706431-092706490
A_24_P942112	11.0638	3.46777	11.0638	up	polymerase (RNA) I polypeptide B, 128kDa	POLR1B	FALSE	Homo sapiens cDNA FLJ10816 fis, clone NT2RP4000997, highly similar to DNA-DIRECTED RNA POLYMERASE I 135 KD POLYPEPTIDE (EC 2.7.7.6). [AK001678]	84172	GO:0005515|GO:0010467|GO:0017126|GO:0007566|GO:0009303|GO:0006363|GO:0005730|GO:0006362|GO:0032549|GO:0006361|GO:0006360|GO:0009790|GO:0003677|GO:0046872|GO:0005737|GO:0005736|GO:0001054|GO:0005654	113334739	chr2	113334680	+	hs|2q13	AK001678	chr2:113334680-113334739		Hs.745127
A_33_P3277323	10.9355	3.45094	10.9355	up			FALSE				165841855	chr4	165841796	-	hs|4q32.3		chr4:165841855-165841796
A_24_P144499	10.9228	3.44927	10.9228	up	peptidylprolyl isomerase A (cyclophilin A)-like 4G	PPIAL4G	FALSE	Homo sapiens peptidylprolyl isomerase A (cyclophilin A)-like 4G (PPIAL4G), mRNA [NM_001123068]	644591	GO:0000413|GO:0005737|GO:0006457|GO:0003755	144363701	chr1	144363642	-	hs|1q21.1	NM_001123068	chr1:144363701-144363642	NM_001123068	Hs.534674
A_33_P3364268	10.9136	3.44805	10.9136	up	limb bud and heart development	LBH	FALSE	Homo sapiens limb bud and heart development (LBH), mRNA [NM_030915]	81606	GO:0010468|GO:0005737|GO:0030193|GO:0007275|GO:0005634|GO:0045893|GO:0006351	30480625	chr2	30480566	+	hs|2p23.1	NM_030915	chr2:30480566-30480625	NM_030915	Hs.567598
A_23_P38537	10.9019	3.44651	10.9019	up	keratin 16	KRT16	FALSE	Homo sapiens keratin 16 (KRT16), mRNA [NM_005557]	3868	GO:0005515|GO:0005882|GO:0030336|GO:0042633|GO:0008283|GO:0045104|GO:0007568|GO:0005634|GO:0008544|GO:0007010|GO:0005200|GO:0005856|GO:0070062	39767364	chr17	39767216	-	hs|17q21.2	NM_005557	chr17:39767364-39767216	NM_005557	Hs.655160
A_33_P3290354	10.8944	3.44551	10.8944	up	fibronectin type III domain containing 1	FNDC1	FALSE	Homo sapiens fibronectin type III domain containing 1 (FNDC1), mRNA [NM_032532]	84624	GO:0031966|GO:0005886|GO:0005911|GO:0005730|GO:0001934|GO:0071456|GO:0010666|GO:0005634|GO:0005576|GO:0051223	159646753	chr6	159646694	+	hs|6q25.3	NM_032532	chr6:159646694-159646753	NM_032532	Hs.520525
A_19_P00809992	10.8774	3.44327	10.8774	up	chromosome 11 open reading frame 74	C11orf74	FALSE	Homo sapiens chromosome 11 open reading frame 74 (C11orf74), transcript variant 1, mRNA [NM_001276722]	119710		36654912	chr11	36654853	+	hs|11p12	NM_001276722	chr11:36654853-36654912	NM_001276722	Hs.159376
A_33_P3212860	10.8078	3.434	10.8078	up	amelotin	AMTN	FALSE	Homo sapiens amelotin (AMTN), transcript variant 1, mRNA [NM_212557]	401138	GO:0003674|GO:0005911|GO:0005605|GO:0005578|GO:0042475|GO:0007155|GO:0031214	71398455	chr4	71398396	+	hs|4q13.3	NM_212557	chr4:71398396-71398455	NM_212557	Hs.453069
A_32_P126609	10.7967	3.43252	10.7967	up	structural maintenance of chromosomes 5	SMC5	FALSE	Homo sapiens structural maintenance of chromosomes 5 (SMC5), mRNA [NM_015110]	23137	GO:0005515|GO:0000781|GO:0030054|GO:0030915|GO:0045842|GO:0005730|GO:0005634|GO:0006303|GO:0005524|GO:0007067|GO:0000724|GO:0016605|GO:0000722|GO:0034184|GO:0090398	72968956	chr9	72968897	+	hs|9q21.12	NM_015110	chr9:72968897-72968956	NM_015110	Hs.534189
A_23_P500364	10.7896	3.43157	10.7896	up	B-cell CLL/lymphoma 7B	BCL7B	FALSE	Homo sapiens B-cell CLL/lymphoma 7B (BCL7B), transcript variant 1, mRNA [NM_001707]	9275	GO:0008150|GO:0003779|GO:0005575	72950825	chr7	72950766	-	hs|7q11.23	NM_001707	chr7:72950825-72950766	NM_001707	Hs.647051
A_24_P411749	10.7464	3.42578	10.7464	up	G protein-coupled receptor 126	GPR126	FALSE	Homo sapiens G protein-coupled receptor 126 (GPR126), transcript variant a1, mRNA [NM_020455]	57211	GO:0007186|GO:0005886|GO:0007218|GO:0004930|GO:0016021	142766962	chr6	142766903	+	hs|6q24.1	NM_020455	chr6:142766903-142766962	NM_020455	Hs.743302
A_33_P3267482	10.7202	3.42227	10.7202	up	mixed lineage kinase 4	KIAA1804	FALSE	Homo sapiens mixed lineage kinase 4 (KIAA1804), mRNA [NM_032435]	84451	GO:0000186|GO:0046777|GO:0018108|GO:0006468|GO:0007257|GO:0005575|GO:0004713|GO:0005524|GO:0004709|GO:0042803	233520476	chr1	233520417	+	hs|1q42.2	NM_032435	chr1:233520417-233520476	NM_032435	Hs.547779
A_24_P62860	10.7063	3.42039	10.7063	up	signal transducing adaptor molecule (SH3 domain and ITAM motif) 2	STAM2	FALSE	Homo sapiens signal transducing adaptor molecule (SH3 domain and ITAM motif) 2 (STAM2), mRNA [NM_005843]	10254	GO:0005515|GO:0005737|GO:0007173|GO:0031901|GO:0016197|GO:0042059|GO:0005730|GO:0061024|GO:0005634|GO:0006886|GO:0043231|GO:0005829	152975469	chr2	152975410	-	hs|2q23.3	NM_005843	chr2:152975469-152975410	NM_005843	Hs.17200
A_32_P155811	10.6879	3.41791	10.6879	up	CD2-associated protein	CD2AP	FALSE	Homo sapiens CD2-associated protein (CD2AP), mRNA [NM_012120]	23607	GO:0048259|GO:0005515|GO:0048471|GO:0017124|GO:0045296|GO:0005886|GO:0008013|GO:0030139|GO:0008022|GO:0015629|GO:0032403|GO:0001726|GO:0016050|GO:0006930|GO:0007165|GO:0016337|GO:0005737|GO:0007067|GO:0031941|GO:0006461|GO:0005200|GO:0043161|GO:0005172|GO:0070062	47594885	chr6	47594826	+	hs|6p12.3	NM_012120	chr6:47594826-47594885	NM_012120	Hs.485518
A_24_P15765	10.6795	3.41678	10.6795	up	ribosomal protein S7 pseudogene 5	RPS7P5	FALSE	Homo sapiens ribosomal protein S7 pseudogene 5 (RPS7P5), non-coding RNA [NR_036695]	645884		240176229	chr1	240176168	+	hs|1q43		chr1:240176168-240176229	NR_036695	Hs.613280
A_23_P320578	10.6691	3.41536	10.6691	up	regulator of G-protein signaling 16	RGS16	FALSE	Homo sapiens regulator of G-protein signaling 16 (RGS16), mRNA [NM_002928]	6004	GO:0043547|GO:0005515|GO:0005516|GO:0005737|GO:0008277|GO:0005886|GO:0038032|GO:0007601|GO:0005096	182567930	chr1	182567871	-	hs|1q25.3	NM_002928	chr1:182567930-182567871	NM_002928	Hs.413297
A_32_P221958	10.6679	3.4152	10.6679	up	ArfGAP with GTPase domain, ankyrin repeat and PH domain 7, pseudogene	AGAP7P	FALSE	Homo sapiens ArfGAP with GTPase domain, ankyrin repeat and PH domain 7, pseudogene (AGAP7P), mRNA [NM_001077685]	653268	GO:0043547|GO:0008060|GO:0032312|GO:0008270	51464420	chr10	51464361	-	hs|10q11.23	NM_001077685	chr10:51464420-51464361	NM_001077685	Hs.528346
A_32_P80255	10.5971	3.4056	10.5971	up	DEAD (Asp-Glu-Ala-Asp) box helicase 6	DDX6	FALSE	Homo sapiens DEAD (Asp-Glu-Ala-Asp) box helicase 6 (DDX6), transcript variant 2, mRNA [NM_001257191]	1656	GO:0005515|GO:0008026|GO:0003724|GO:0010467|GO:0033962|GO:0006200|GO:0016070|GO:0016071|GO:0010494|GO:0004386|GO:0043928|GO:0005524|GO:0043231|GO:0016442|GO:0005829|GO:0005737|GO:0000932|GO:0000288	118618713	chr11	118618654	-	hs|11q23.3	NM_001257191	chr11:118618713-118618654	NM_001257191	Hs.408461
A_23_P309207	10.5459	3.39862	10.5459	up	zinc finger protein 577	ZNF577	FALSE	Homo sapiens zinc finger protein 577 (ZNF577), transcript variant 1, mRNA [NM_032679]	84765	GO:0006355|GO:0003700|GO:0005634|GO:0003677|GO:0046872|GO:0006351	52375475	chr19	52375416	-	hs|19q13.41	NM_032679	chr19:52375475-52375416	NM_032679	Hs.729135
A_24_P830667	10.5224	3.39539	10.5224	up	ribosomal protein L21	RPL21	FALSE	Homo sapiens ribosomal protein L21 (RPL21), mRNA [NM_000982]	6144	GO:0010467|GO:0003735|GO:0016070|GO:0016071|GO:0019083|GO:0003723|GO:0006614|GO:0019058|GO:0005730|GO:0006415|GO:0006412|GO:0006413|GO:0005829|GO:0006414|GO:0005737|GO:0000184|GO:0016032|GO:0022625|GO:0044267	27829379	chr13	27828361	+	hs|13q12.2	NM_000982	chr13:27828361-27829379	NM_000982	Hs.381123
A_33_P3398840	10.4744	3.38879	10.4744	up	zinc finger, BED-type containing 1	ZBED1	FALSE	Homo sapiens zinc finger, BED-type containing 1 (ZBED1), transcript variant 3, mRNA [NM_001171135]	9189	GO:0008152|GO:0046983|GO:0000228|GO:0003677|GO:0046872|GO:0004803	2406570	chrX	2406511	-	hs|Xp22.33	NM_001171135	chrX:2406570-2406511	NM_001171135	Hs.131452
A_24_P44341	10.406	3.37934	10.406	up	UDP-glucose glycoprotein glucosyltransferase 2	UGGT2	FALSE	Homo sapiens UDP-glucose glycoprotein glucosyltransferase 2 (UGGT2), mRNA [NM_020121]	55757	GO:0005793|GO:0006457|GO:0005788|GO:0003980|GO:0044267|GO:0043687|GO:0018279	96665632	chr13	96665573	-	hs|13q32.1	NM_020121	chr13:96665632-96665573	NM_020121	Hs.193226
A_33_P3286958	10.3327	3.36915	10.3327	up	UDP-Gal:betaGlcNAc beta 1,3-galactosyltransferase, polypeptide 2	B3GALT2	FALSE	Homo sapiens UDP-Gal:betaGlcNAc beta 1,3-galactosyltransferase, polypeptide 2 (B3GALT2), mRNA [NM_003783]	8707	GO:0009312|GO:0000139|GO:0008499|GO:0006486|GO:0016021	193148275	chr1	193148216	-	hs|1q31.2	NM_003783	chr1:193148275-193148216	NM_003783	Hs.518834
A_24_P84808	10.2931	3.36361	10.2931	up			FALSE				6593884	chr19	6593823	+	hs|19p13.3		chr19:006593823-006593884
A_24_P786713	10.265	3.35966	10.265	up			FALSE				34402650	chr12	34402591	+	hs|12p11.1		chr12:034402591-034402650
A_24_P734720	10.2327	3.35512	10.2327	up	cyclin Y-like 1	CCNYL1	FALSE	Homo sapiens cyclin Y-like 1 (CCNYL1), transcript variant 2, mRNA [NM_152523]	151195	GO:0019901|GO:0000079	208619079	chr2	208619020	+	hs|2q33.3	NM_152523	chr2:208619020-208619079	NM_152523	Hs.471234
A_33_P3313596	10.1818	3.34792	10.1818	up	cyclin-dependent kinase 11A	CDK11A	FALSE	Homo sapiens cyclin-dependent kinase 11A (CDK11A), transcript variant 4, mRNA [NM_033529]	728642	GO:0007067|GO:0006355|GO:0005737|GO:0004672|GO:0004674|GO:0006915|GO:0006468|GO:0005634|GO:0050684|GO:0005524|GO:0001558|GO:0004693	1654207	chr1	1654148	-	hs|1p36.33	NM_033529	chr1:1654207-1654148	NM_033529	Hs.651228
A_24_P160874	10.1559	3.34425	10.1559	up	deoxyuridine triphosphatase	DUT	FALSE	Homo sapiens deoxyuridine triphosphatase (DUT), transcript variant 1, mRNA [NM_001025248]	1854	GO:0005515|GO:0046080|GO:0005730|GO:0055086|GO:0005634|GO:0044281|GO:0006226|GO:0005739|GO:0006260|GO:0006139|GO:0046134|GO:0004170|GO:0005654|GO:0006206|GO:0070062	48634231	chr15	48633737	+	hs|15q21.1	NM_001025248	chr15:48633737-48634231	NM_001025248	Hs.527980
A_24_P917866	10.1432	3.34244	10.1432	up	SET nuclear oncogene	SET	FALSE	Homo sapiens SET nuclear oncogene (SET), transcript variant 2, mRNA [NM_003011]	6418	GO:0005515|GO:0010467|GO:0048471|GO:0005783|GO:0004864|GO:0008601|GO:0005634|GO:0035067|GO:0005829|GO:0042393|GO:0005737|GO:0043524|GO:0016070|GO:0016071|GO:0006334|GO:0006337|GO:0003677|GO:0043086|GO:0006913|GO:0006260|GO:0043234|GO:0050790|GO:0005654|GO:0000278|GO:0045892	131457801	chr9	131457742	+	hs|9q34.11	NM_003011	chr9:131457742-131457801	NM_003011	Hs.436687
A_32_P133670	10.1318	3.34082	10.1318	up	acidic (leucine-rich) nuclear phosphoprotein 32 family, member A	ANP32A	FALSE	Homo sapiens acidic (leucine-rich) nuclear phosphoprotein 32 family, member A (ANP32A), mRNA [NM_006305]	8125	GO:0005515|GO:0010467|GO:0006355|GO:0048471|GO:0016070|GO:0005783|GO:0016071|GO:0005634|GO:0006351|GO:0006913|GO:0035556|GO:0005737|GO:0005654	69079782	chr15	69076906	-	hs|15q23	NM_006305	chr15:69079782-69076906	NM_006305	Hs.458747
A_19_P00811518	10.1116	3.33793	10.1116	up			FALSE				36920863	chr3	36920804	-	hs|3p22.2		chr3:036920863-036920804
A_33_P3310989	10.1023	3.33661	10.1023	up	ubiquitin associated protein 2-like	UBAP2L	FALSE	Homo sapiens ubiquitin associated protein 2-like (UBAP2L), transcript variant 1, mRNA [NM_014847]	9898	GO:0005515|GO:0005671|GO:0007339	154243328	chr1	154243269	+	hs|1q21.3	NM_014847	chr1:154243269-154243328	NM_014847	Hs.490551
A_19_P00803285	10.0509	3.32926	10.0509	up			FALSE				72632341	chr15	72632282	-	hs|15q23		chr15:072632341-072632282
A_24_P152325	10.0409	3.32781	10.0409	up			FALSE				5600460	chr7	5600401	+	hs|7p22.1		chr7:005600401-005600460
A_19_P00322900	10.0165	3.3243	10.0165	up	myocardial infarction associated transcript (non-protein coding)	MIAT	FALSE	Homo sapiens myocardial infarction associated transcript (non-protein coding) (MIAT), transcript variant 1, long non-coding RNA [NR_003491]	440823		27072338	chr22	27072279	+	hs|22q12.1	NR_003491	chr22:27072279-27072338	NR_003491	Hs.517502
A_33_P3286146	9.99218	3.3208	9.99218	up	uncharacterized LOC100132891	LOC100132891	FALSE	Homo sapiens uncharacterized LOC100132891 (LOC100132891), transcript variant 1, long non-coding RNA [NR_033652]	100132891		72965490	chr8	72965431	+	hs|8q13.3	NR_033652	chr8:72965431-72965490	NR_033652	Hs.137674
A_23_P131846	9.96882	3.31742	9.96882	up	snail family zinc finger 1	SNAI1	FALSE	Homo sapiens snail family zinc finger 1 (SNAI1), mRNA [NM_005985]	6615	GO:0005515|GO:2000810|GO:0010718|GO:0005634|GO:0001837|GO:0046872|GO:0031069|GO:0005737|GO:0061314|GO:0060972|GO:0060021|GO:0019900|GO:0030335|GO:0001707|GO:0060707|GO:0000122|GO:0060806|GO:0001649|GO:0043565|GO:0001078|GO:0016477|GO:0043518|GO:0060536|GO:0045893|GO:0010957	48605229	chr20	48605170	+	hs|20q13.13	NM_005985	chr20:48605170-48605229	NM_005985	Hs.48029
A_23_P372478	9.89933	3.30733	9.89933	up	serpin peptidase inhibitor, clade A (alpha-1 antiproteinase, antitrypsin), member 9	SERPINA9	FALSE	Homo sapiens serpin peptidase inhibitor, clade A (alpha-1 antiproteinase, antitrypsin), member 9 (SERPINA9), transcript variant 1, mRNA [NM_175739]	327657	GO:0030162|GO:0010951|GO:0005737|GO:0016020|GO:0004867|GO:0005615	94933457	chr14	94931144	-	hs|14q32.13	NM_175739	chr14:94933457-94931144	NM_175739	Hs.317970
A_33_P3242923	9.88674	3.30549	9.88674	up	long intergenic non-protein coding RNA 640	LINC00640	FALSE	Homo sapiens long intergenic non-protein coding RNA 640 (LINC00640), long non-coding RNA [NR_038358]	283553		51832245	chr14	51832186	+	hs|14q22.1	NR_038358	chr14:51832186-51832245	NR_038358	Hs.325752
A_33_P3246418	9.87844	3.30428	9.87844	up	MyoD family inhibitor	MDFI	FALSE	Homo sapiens MyoD family inhibitor (MDFI), mRNA [NM_005586]	4188	GO:0005515|GO:0060707|GO:0030178|GO:0005634|GO:0042994|GO:0048704|GO:0000122|GO:0007257|GO:0009790|GO:0009950|GO:0043392|GO:0005737|GO:0008134	41621970	chr6	41621911	+	hs|6p21.1	NM_005586	chr6:41621911-41621970	NM_005586	Hs.520119
A_19_P00804882	9.83898	3.29851	9.83898	up			FALSE				9288392	chr12	9288333	+	hs|12p13.31		chr12:009288333-009288392
A_33_P3275350	9.81389	3.29483	9.81389	up	neuronal calcium sensor 1	NCS1	FALSE	Homo sapiens neuronal calcium sensor 1 (NCS1), transcript variant 1, mRNA [NM_014286]	23413	GO:0005515|GO:0030424|GO:0048471|GO:0000287|GO:0030054|GO:0005245|GO:0005886|GO:0019901|GO:0048015|GO:0005509|GO:0014069|GO:0031410|GO:0030425|GO:0043231|GO:0005829|GO:0045921|GO:0005737|GO:0045211|GO:0032580|GO:0010975|GO:0070588|GO:0070062	132998900	chr9	132998841	+	hs|9q34.11	NM_014286	chr9:132998841-132998900	NM_014286	Hs.642946
A_33_P3407235	9.79101	3.29146	9.79101	up			FALSE				73351775	chrX	73351716	+	hs|Xq13.2		chrX:073351716-073351775
A_23_P214144	9.78223	3.29016	9.78223	up	collagen, type X, alpha 1	COL10A1	FALSE	Homo sapiens collagen, type X, alpha 1 (COL10A1), mRNA [NM_000493]	1300	GO:0005581|GO:0001958|GO:0001501|GO:0022617|GO:0051216|GO:0030198|GO:0030574|GO:0005578|GO:0005788|GO:0005576|GO:0005938|GO:0046872	116441120	chr6	116441061	-	hs|6q22.1	NM_000493	chr6:116441120-116441061	NM_000493	Hs.520339
A_24_P792124	9.72367	3.2815	9.72367	up	sodium channel, voltage-gated, type IX, alpha subunit	SCN9A	FALSE	Homo sapiens sodium channel, voltage-gated, type IX, alpha subunit (SCN9A), mRNA [NM_002977]	6335	GO:0005886|GO:0086010|GO:0005248|GO:0009636|GO:0009791|GO:0031402|GO:0019228|GO:0006954|GO:0001518|GO:0034765|GO:0035725|GO:0006814|GO:0048266	167052099	chr2	167052040	-	hs|2q24.3	NM_002977	chr2:167052099-167052040	NM_002977	Hs.439145
A_33_P3312564	9.71208	3.27978	9.71208	up			FALSE				175266367	chr1	175266308	+	hs|1q25.1		chr1:175266308-175266367
A_19_P00800140	9.68726	3.27609	9.68726	up			FALSE				9221866	chr2	9221807	-	hs|2p25.1		chr2:009221866-009221807
A_24_P179489	9.63721	3.26862	9.63721	up	serologically defined colon cancer antigen 8	SDCCAG8	FALSE	Homo sapiens serologically defined colon cancer antigen 8 (SDCCAG8), mRNA [NM_006642]	10806	GO:0005515|GO:0005813|GO:0005911|GO:0005814|GO:0035148|GO:0000086|GO:0030010|GO:0000278|GO:0005829	243468066	chr1	243456514	+	hs|1q43	NM_006642	chr1:243456514-243468066	NM_006642	Hs.591530
A_33_P3415052	9.62881	3.26736	9.62881	up	NIPA-like domain containing 4	NIPAL4	FALSE	Homo sapiens NIPA-like domain containing 4 (NIPAL4), transcript variant 2, mRNA [NM_001172292]	348938	GO:0015693|GO:0015095|GO:0016021	156901729	chr5	156901670	+	hs|5q33.3	NM_001172292	chr5:156901670-156901729	NM_001172292	Hs.4285
A_24_P154948	9.60025	3.26307	9.60025	up	glycyl-tRNA synthetase	GARS	FALSE	Homo sapiens glycyl-tRNA synthetase (GARS), mRNA [NM_002047]	2617	GO:0008219|GO:0010467|GO:0015966|GO:0005730|GO:0005634|GO:0005524|GO:0006426|GO:0004820|GO:0005829|GO:0006418|GO:0005737|GO:0005759|GO:0046983|GO:0030141|GO:0070062	30668190	chr7	30665891	+	hs|7p14.3	NM_002047	chr7:30665891-30668190	NM_002047	Hs.404321
A_33_P3303146	9.52889	3.25231	9.52889	up	autophagy related 4C, cysteine peptidase	ATG4C	FALSE	Homo sapiens autophagy related 4C, cysteine peptidase (ATG4C), transcript variant 1, mRNA [NM_032852]	84938	GO:0006501|GO:0006995|GO:0000422|GO:0006914|GO:0005576|GO:0051697|GO:0005829|GO:0004197|GO:0005737|GO:0016485|GO:0006612|GO:0006508|GO:0034727|GO:0008233|GO:0000045	63330049	chr1	63329990	+	hs|1p31.3	NM_032852	chr1:63329990-63330049	NM_032852	Hs.7353
A_33_P3415221	9.50308	3.2484	9.50308	up			FALSE				196263642	chr3	196263583	+	hs|3q29		chr3:196263583-196263642
A_23_P90369	9.48692	3.24594	9.48692	up	transmembrane protein 259	TMEM259	FALSE	Homo sapiens transmembrane protein 259 (TMEM259), transcript variant 1, mRNA [NM_001033026]	91304	GO:0005737|GO:0016021	1009717	chr19	1009658	-	hs|19p13.3	NM_001033026	chr19:1009717-1009658	NM_001033026	Hs.515003
A_33_P3252068	9.44383	3.23937	9.44383	up	lysine (K)-specific demethylase 7A	KDM7A	FALSE	Homo sapiens lysine (K)-specific demethylase 7A (KDM7A), mRNA [NM_030647]	80853	GO:0032454|GO:0035574|GO:0035575|GO:0005506|GO:0005730|GO:0005634|GO:0035064|GO:0051864|GO:0006351|GO:0070544|GO:0071557|GO:0016706|GO:0008270|GO:0030901|GO:0045893|GO:0071558|GO:0055114|GO:0033169	139796415	chr7	139796356	-	hs|7q34	NM_030647	chr7:139796415-139796356	NM_030647	Hs.308710
A_33_P3220565	9.42369	3.23629	9.42369	up	ubiquitin domain containing 2	UBTD2	FALSE	Homo sapiens ubiquitin domain containing 2 (UBTD2), mRNA [NM_152277]	92181	GO:0005737	171636775	chr5	171636716	-	hs|5q35.1	NM_152277	chr5:171636775-171636716	NM_152277	Hs.131570
A_33_P3355567	9.40627	3.23362	9.40627	up			FALSE	Homo sapiens mRNA; cDNA DKFZp313C1042 (from clone DKFZp313C1042) [AL833436]			87494784	chr8	87494725	-	hs|8q21.3	AL833436	chr8:87494784-87494725		Hs.662001
A_33_P3264072	9.38036	3.22964	9.38036	up	uncharacterized LOC100128593	LOC100128593	FALSE	Homo sapiens uncharacterized LOC100128593 (LOC100128593), long non-coding RNA [NR_033913]	100128593		139643408	chr9	139643349	+	hs|9q34.3	NR_033913	chr9:139643349-139643408	NR_033913	Hs.679904
A_19_P00812748	9.364	3.22713	9.364	up	N-deacetylase/N-sulfotransferase (heparan glucosaminyl) 1	NDST1	FALSE	N-deacetylase/N-sulfotransferase (heparan glucosaminyl) 1 [Source:HGNC Symbol;Acc:7680] [ENST00000518299]	3340	GO:0007585|GO:0005975|GO:0019213|GO:0048703|GO:0044281|GO:0015012|GO:0048702|GO:0006024|GO:0007224|GO:0015016|GO:0006954|GO:0000139|GO:0000165|GO:0008543|GO:0030901|GO:0030900|GO:0016021|GO:0030203|GO:0030210|GO:0000271	149877636	chr5	149877577	+	hs|5q33.1		chr5:149877577-149877636
A_23_P66881	9.35313	3.22545	9.35313	up	regulator of G-protein signaling 9	RGS9	FALSE	Homo sapiens regulator of G-protein signaling 9 (RGS9), transcript variant 1, mRNA [NM_003835]	8787	GO:0043627|GO:0005886|GO:0007603|GO:0005834|GO:0038032|GO:0005634|GO:0022400|GO:0007212|GO:0032403|GO:0007399|GO:0043547|GO:0035556|GO:0005737|GO:0008277|GO:0004871|GO:0007601|GO:0005096|GO:0016056	63223659	chr17	63223600	+	hs|17q24.1	NM_003835	chr17:63223600-63223659	NM_003835	Hs.664380
A_33_P3259339	9.33956	3.22335	9.33956	up	collagen, type XI, alpha 1	COL11A1	FALSE	Homo sapiens collagen, type XI, alpha 1 (COL11A1), transcript variant B, mRNA [NM_080629]	1301	GO:0042472|GO:0055010|GO:0005592|GO:0007605|GO:0050840|GO:0048704|GO:0005576|GO:0006029|GO:0046872|GO:0035989|GO:0002063|GO:0022617|GO:0001502|GO:0030198|GO:0050910|GO:0030199|GO:0030574|GO:0005788|GO:0030674|GO:0007601|GO:0005201	103342142	chr1	103342083	-	hs|1p21.1	NM_080629	chr1:103342142-103342083	NM_080629	Hs.523446
A_24_P247536	9.30018	3.21726	9.30018	up	family with sequence similarity 133, member B	FAM133B	FALSE	Homo sapiens family with sequence similarity 133, member B (FAM133B), transcript variant 2, mRNA [NM_001040057]	257415		92208653	chr7	92207671	-	hs|7q21.2	NM_001040057	chr7:92208653-92207671	NM_001040057	Hs.489105
A_33_P3346193	9.29836	3.21698	9.29836	up	tropomyosin 3	TPM3	FALSE	Homo sapiens tropomyosin 3 (TPM3), transcript variant 4, mRNA [NM_001043351]	7170	GO:0001725|GO:0005862|GO:0030049|GO:0002102|GO:0006928|GO:0003779|GO:0032154|GO:0005829|GO:0030426|GO:0003674|GO:0006936|GO:0031941|GO:0030863|GO:0005856|GO:0070062	154143185	chr1	154143126	-	hs|1q21.3	NM_001043351	chr1:154143185-154143126	NM_001043351	Hs.644306
A_23_P302568	9.22537	3.20561	9.22537	up	solute carrier family 30 (zinc transporter), member 3	SLC30A3	FALSE	Homo sapiens solute carrier family 30 (zinc transporter), member 3 (SLC30A3), mRNA [NM_003459]	7781	GO:0071577|GO:0043005|GO:0030054|GO:0061088|GO:0005770|GO:0015633|GO:0055085|GO:0008021|GO:0005737|GO:0016020|GO:0005887|GO:0006810|GO:0030672|GO:0051050|GO:0005768	27477607	chr2	27477548	-	hs|2p23.3	NM_003459	chr2:27477607-27477548	NM_003459	Hs.467981
A_23_P95050	9.2205	3.20484	9.2205	up	ADP-ribosylation factor interacting protein 1	ARFIP1	FALSE	Homo sapiens ADP-ribosylation factor interacting protein 1 (ARFIP1), transcript variant 1, mRNA [NM_001025595]	27236	GO:0003674|GO:0000139|GO:0019904|GO:0050708|GO:0006886|GO:0042802|GO:0005829	153831411	chr4	153831352	+	hs|4q31.3	NM_001025595	chr4:153831352-153831411	NM_001025595	Hs.416089
A_23_P377376	9.19194	3.20037	9.19194	up	ARP2 actin-related protein 2 homolog (yeast)	ACTR2	FALSE	Homo sapiens ARP2 actin-related protein 2 homolog (yeast) (ACTR2), transcript variant 1, mRNA [NM_001005386]	10097	GO:0008356|GO:0033206|GO:0030036|GO:0005885|GO:0006928|GO:0030478|GO:0003779|GO:0042995|GO:0015629|GO:0005524|GO:0005829|GO:0051653|GO:0007163|GO:0045087|GO:0016482|GO:0038096|GO:0070062	65496948	chr2	65496889	+	hs|2p14	NM_001005386	chr2:65496889-65496948	NM_001005386	Hs.744913
A_33_P3339361	9.18831	3.1998	9.18831	up	Rho GTPase activating protein 11A	ARHGAP11A	FALSE	Homo sapiens Rho GTPase activating protein 11A (ARHGAP11A), transcript variant 2, mRNA [NM_199357]	9824	GO:0043547|GO:0051056|GO:0007264|GO:0005829|GO:0005096	32928143	chr15	32928084	+	hs|15q13.3	NM_199357	chr15:32928084-32928143	NM_199357	Hs.591130
A_24_P253003	9.15881	3.19516	9.15881	up	wingless-type MMTV integration site family, member 11	WNT11	FALSE	Homo sapiens wingless-type MMTV integration site family, member 11 (WNT11), mRNA [NM_004626]	7481	GO:0030308|GO:0030325|GO:0044212|GO:0071300|GO:0048706|GO:0032915|GO:0061101|GO:0048844|GO:0030282|GO:0060675|GO:0005615|GO:0005109|GO:0005737|GO:0090037|GO:0070830|GO:0072177|GO:0030182|GO:0045860|GO:0060548|GO:0060021|GO:0031667|GO:0090090|GO:0060070|GO:0072201|GO:0030336|GO:0043066|GO:0030335|GO:0043065|GO:0060412|GO:0005578|GO:0090272|GO:0005576|GO:0030295|GO:0003151|GO:0001649|GO:0010628|GO:…	75897645	chr11	75897586	-	hs|11q13.5	NM_004626	chr11:75897645-75897586	NM_004626	Hs.108219
A_23_P26314	9.14172	3.19247	9.14172	up	zinc finger protein 319	ZNF319	FALSE	Homo sapiens zinc finger protein 319 (ZNF319), mRNA [NM_020807]	57567	GO:0006355|GO:0005634|GO:0003677|GO:0046872|GO:0006351	58028710	chr16	58028651	-	hs|16q21	NM_020807	chr16:58028710-58028651	NM_020807	Hs.129268
A_23_P371266	9.12845	3.19037	9.12845	up	dynamin 3	DNM3	FALSE	Homo sapiens dynamin 3 (DNM3), transcript variant 1, mRNA [NM_015569]	26052	GO:0006184|GO:0005739|GO:0005515|GO:0048471|GO:0043197|GO:0005874|GO:0003924|GO:0014069|GO:0046847|GO:0005525|GO:0007416|GO:0006897	172381746	chr1	172381687	+	hs|1q24.3	NM_015569	chr1:172381687-172381746	NM_015569	Hs.654775
A_24_P271049	9.12639	3.19004	9.12639	up	chromosome 18 open reading frame 32	C18orf32	FALSE	Homo sapiens chromosome 18 open reading frame 32 (C18orf32), transcript variant 2, mRNA [NM_001035005]	497661	GO:0007165|GO:0004871|GO:0043123	47008752	chr18	47008693	-	hs|18q21.1	NM_001035005	chr18:47008752-47008693	NM_001035005	Hs.603040
A_23_P132175	9.10725	3.18701	9.10725	up	reticulon 4 receptor	RTN4R	FALSE	Homo sapiens reticulon 4 receptor (RTN4R), mRNA [NM_023004]	65078	GO:0005515|GO:0048011|GO:0009986|GO:0005886|GO:0005783|GO:0050771|GO:0004872|GO:0031225|GO:0007409|GO:0050770	20229029	chr22	20228970	-	hs|22q11.21	NM_023004	chr22:20229029-20228970	NM_023004	Hs.30868
A_33_P3408918	9.09161	3.18454	9.09161	up	serum amyloid A2	SAA2	FALSE	Homo sapiens serum amyloid A2 (SAA2), transcript variant 1, mRNA [NM_030754]	6289	GO:0034364|GO:0006953	18266850	chr11	18266791	-	hs|11p15.1	NM_030754	chr11:18266850-18266791	NM_030754	Hs.731376
A_24_P677642	9.05248	3.17831	9.05248	up	family with sequence similarity 21, member A pseudogene	FAM21EP	FALSE	Homo sapiens family with sequence similarity 21, member E, pseudogene (FAM21EP), non-coding RNA [NR_038275]	100421577		51826458	chr10	51826399	-	hs|10q11.23	NR_038275	chr10:51826458-51826399	NR_038275	Hs.712902
A_33_P3392537	9.03631	3.17573	9.03631	up	thymidine kinase 2, mitochondrial	TK2	FALSE	Homo sapiens thymidine kinase 2, mitochondrial (TK2), transcript variant 1, mRNA [NM_004614]	7084	GO:0009157|GO:0046092|GO:0005743|GO:0046104|GO:0055086|GO:0044281|GO:0043097|GO:0005524|GO:0016310|GO:0006139|GO:0009262|GO:0005759|GO:0016773|GO:0004137|GO:0006264|GO:0006206|GO:0004797	66543411	chr16	66543352	-	hs|16q21	NM_004614	chr16:66543411-66543352	NM_004614	Hs.512619
A_23_P163567	9.03343	3.17527	9.03343	up	sphingomyelin phosphodiesterase 3, neutral membrane (neutral sphingomyelinase II)	SMPD3	FALSE	Homo sapiens sphingomyelin phosphodiesterase 3, neutral membrane (neutral sphingomyelinase II) (SMPD3), mRNA [NM_018667]	55512	GO:0006665|GO:0007049|GO:0006685|GO:0000137|GO:0006687|GO:0005886|GO:0000139|GO:0004767|GO:0007275|GO:0044281|GO:0030072|GO:0046872	68392309	chr16	68392250	-	hs|16q22.1	NM_018667	chr16:68392309-68392250	NM_018667	Hs.368421
A_33_P3396239	9.0258	3.17405	9.0258	up	small nuclear ribonucleoprotein D3 polypeptide 18kDa	SNRPD3	FALSE	Homo sapiens small nuclear ribonucleoprotein D3 polypeptide 18kDa (SNRPD3), transcript variant 1, mRNA [NM_004175]	6634	GO:0005515|GO:0008380|GO:0006369|GO:0010467|GO:0006366|GO:0031124|GO:0005634|GO:0071013|GO:0005829|GO:0005737|GO:0005683|GO:0030532|GO:0005681|GO:0005687|GO:0005685|GO:0070062|GO:0008334|GO:0016070|GO:0005730|GO:0034660|GO:0000387|GO:0034709|GO:0000398|GO:0005654|GO:0034715|GO:0019899|GO:0034719|GO:0005689|GO:0071208	24967973	chr22	24967914	+	hs|22q11.23	NM_004175	chr22:24967914-24967973	NM_004175	Hs.356549
A_24_P395814	9.02039	3.17319	9.02039	up	chorionic gonadotropin, beta polypeptide	CGB	FALSE	Homo sapiens chorionic gonadotropin, beta polypeptide (CGB), mRNA [NM_000737]	1082	GO:0007165|GO:0016486|GO:0005179|GO:0007267|GO:0006915|GO:0005576|GO:0007292|GO:0044267	49526300	chr19	49526241	-	hs|19q13.33	NM_000737	chr19:49526300-49526241	NM_000737	Hs.446683
A_23_P364478	9.01604	3.17249	9.01604	up	family with sequence similarity 175, member B	FAM175B	FALSE	Homo sapiens family with sequence similarity 175, member B (FAM175B), mRNA [NM_032182]	23172	GO:0070552|GO:0031593	126524925	chr10	126524866	+	hs|10q26.13	NM_032182	chr10:126524866-126524925	NM_032182	Hs.280695
A_32_P54503	9.01351	3.17209	9.01351	up	JHDM1D antisense RNA 1 (head to head)	JHDM1D-AS1	FALSE	Homo sapiens JHDM1D antisense RNA 1 (head to head) (JHDM1D-AS1), long non-coding RNA [NR_024451]	100134229		139878919	chr7	139878860	+	hs|7q34	NR_024451	chr7:139878860-139878919	NR_024451	Hs.634333
A_23_P17354	8.99775	3.16956	8.99775	up	ganglioside induced differentiation associated protein 1-like 1	GDAP1L1	FALSE	Homo sapiens ganglioside induced differentiation associated protein 1-like 1 (GDAP1L1), transcript variant 2, mRNA [NM_024034]	78997		42907784	chr20	42907725	+	hs|20q13.12	NM_024034	chr20:42907725-42907784	NM_024034	Hs.517059
A_24_P418536	8.95403	3.16254	8.95403	up			FALSE				119762160	chr1	119762099	-	hs|1p12		chr1:119762160-119762099
A_33_P3219454	8.94263	3.1607	8.94263	up			FALSE				47488509	chr21	47488450	+	hs|21q22.3		chr21:047488450-047488509
A_33_P3240348	8.9313	3.15887	8.9313	up	neurofibromin 1	NF1	FALSE	Homo sapiens neurofibromin 1 (NF1), transcript variant 2, mRNA [NM_000267]	4763	GO:0001656|GO:0005515|GO:0048844|GO:0048593|GO:0042992|GO:0007406|GO:0007507|GO:0046580|GO:0043525|GO:0000165|GO:0030198|GO:0048745|GO:0030199|GO:0048169|GO:0021897|GO:0032318|GO:0030336|GO:0031235|GO:0045685|GO:0014065|GO:0048485|GO:0046929|GO:0001649|GO:0043535|GO:0001889|GO:0032320|GO:0007519|GO:0007420|GO:0008542|GO:0032228|GO:0007422|GO:0042060|GO:0001952|GO:0001953|GO:0008625|GO:0030424|GO:…	29557351	chr17	29557291	+	hs|17q11.2	NM_000267	chr17:29557291-29557351	NM_000267	Hs.113577
A_19_P00805936	8.90639	3.15484	8.90639	up			FALSE				139204741	chr2	139204682	+	hs|2q22.1		chr2:139204682-139204741
A_23_P132121	8.90434	3.15451	8.90434	up	salt-inducible kinase 1	SIK1	FALSE	Homo sapiens salt-inducible kinase 1 (SIK1), mRNA [NM_173354]	150094	GO:0005515|GO:0042826|GO:0010830|GO:0032792|GO:0005634|GO:0005829|GO:0035556|GO:0071889|GO:0008140|GO:0005737|GO:0046777|GO:2000210|GO:0055007|GO:0045721|GO:0010868|GO:0000287|GO:0019901|GO:0043276|GO:0000122|GO:0005524|GO:0007346|GO:0007049|GO:0004674|GO:0002028|GO:0006468|GO:0045595	44834819	chr21	44834760	-	hs|21q22.3	NM_173354	chr21:44834819-44834760	NM_173354	Hs.282113
A_32_P47754	8.88312	3.15107	8.88312	up	solute carrier family 2 (facilitated glucose transporter), member 14	SLC2A14	FALSE	Homo sapiens solute carrier family 2 (facilitated glucose transporter), member 14 (SLC2A14), transcript variant 1, mRNA [NM_001286233]	144195	GO:0015758|GO:0007275|GO:0005634|GO:0016021|GO:0007283|GO:0055085|GO:0030154|GO:0005355	7965262	chr12	7965203	-	hs|12p13.31	NM_001286233	chr12:7965262-7965203	NM_001286233	Hs.655169
A_33_P3382887	8.86273	3.14775	8.86273	up			FALSE				58462067	chr18	58462008	-	hs|18q21.32		chr18:058462067-058462008
A_24_P358205	8.84403	3.1447	8.84403	up			FALSE				10214455	chr6	10214395	-	hs|6p24.3		chr6:010214455-010214395
A_24_P176079	8.83956	3.14397	8.83956	up	WAS protein family, member 3	WASF3	FALSE	Homo sapiens WAS protein family, member 3 (WASF3), transcript variant 1, mRNA [NM_006646]	10810	GO:0005737|GO:0006461|GO:0014003|GO:0008360|GO:0030032|GO:0007010|GO:0030041|GO:0003779|GO:0005856|GO:0030027|GO:0031643	27262753	chr13	27262694	+	hs|13q12.13	NM_006646	chr13:27262694-27262753	NM_006646	Hs.618732
A_33_P3248615	8.83804	3.14373	8.83804	up			FALSE	Q9P1R3_HUMAN (Q9P1R3) HDCME13P (Fragment), partial (92%) [THC2691933]			8021967	chr7	8021908	+	hs|7p21.3		chr7:008021908-008021967
A_24_P416177	8.83565	3.14334	8.83565	up	adenylate cyclase 7	ADCY7	FALSE	Homo sapiens adenylate cyclase 7 (ADCY7), transcript variant 1, mRNA [NM_001114]	113	GO:0005886|GO:0030819|GO:0007268|GO:0007202|GO:0044281|GO:0007193|GO:0046872|GO:0035556|GO:0007173|GO:0071377|GO:0006171|GO:0006833|GO:0034199|GO:0048011|GO:0060135|GO:0005524|GO:0055085|GO:0007165|GO:0071361|GO:0006112|GO:0004016|GO:0008543|GO:0045087|GO:0007189|GO:0016021	50351906	chr16	50351847	+	hs|16q12.1	NM_001114	chr16:50351847-50351906	NM_001114	Hs.513578
A_24_P935986	8.82387	3.14141	8.82387	up	branched chain amino-acid transaminase 1, cytosolic	BCAT1	FALSE	Homo sapiens branched chain amino-acid transaminase 1, cytosolic (BCAT1), transcript variant 1, mRNA [NM_005504]	586	GO:0008283|GO:0004084|GO:0052656|GO:0052654|GO:0052655|GO:0009083|GO:0044281|GO:0005829|GO:0042802|GO:0005739|GO:0034641|GO:0000082|GO:0009082	24964511	chr12	24964452	-	hs|12p12.1	NM_005504	chr12:24964511-24964452	NM_005504	Hs.438993
A_23_P86411	8.81197	3.13946	8.81197	up	myosin IIIA	MYO3A	FALSE	Homo sapiens myosin IIIA (MYO3A), mRNA [NM_017433]	53904	GO:0005516|GO:0006200|GO:0007605|GO:0051491|GO:0016459|GO:0030175|GO:0030898|GO:0032433|GO:0005737|GO:0000146|GO:0046777|GO:0051015|GO:0018105|GO:0018107|GO:0060002|GO:0048839|GO:0005524|GO:0032426|GO:0001917|GO:0004672|GO:0031941|GO:0043531|GO:0004674|GO:0007601|GO:0050896	26491963	chr10	26491904	+	hs|10p12.1	NM_017433	chr10:26491904-26491963	NM_017433	Hs.662630
A_24_P333106	8.79708	3.13702	8.79708	up			FALSE	GB			35163688	chr14	35163629	+	hs|14q13.1		chr14:035163629-035163688
A_24_P416961	8.79614	3.13687	8.79614	up	armadillo repeat gene deleted in velocardiofacial syndrome	ARVCF	FALSE	Homo sapiens armadillo repeat gene deleted in velocardiofacial syndrome (ARVCF), mRNA [NM_001670]	421	GO:0016339|GO:0005622|GO:0005515|GO:0016337|GO:0005737|GO:0005886|GO:0007275|GO:0005634|GO:0007155	19957509	chr22	19957450	-	hs|22q11.21	NM_001670	chr22:19957509-19957450	NM_001670	Hs.713616
A_23_P89073	8.77187	3.13288	8.77187	up	zinc finger protein 23	ZNF23	FALSE	Homo sapiens zinc finger protein 23 (ZNF23), mRNA [NM_145911]	7571	GO:0006355|GO:0003700|GO:0005634|GO:0003677|GO:0046872|GO:0006351	71481852	chr16	71481793	-	hs|16q22.2	NM_145911	chr16:71481852-71481793	NM_145911	Hs.656643
A_33_P3672756	8.76972	3.13253	8.76972	up	uncharacterized LOC284561	LOC284561	FALSE	PREDICTED: Homo sapiens uncharacterized LOC284561 (LOC284561), misc_RNA [XR_110828]	284561		147763933	chr1	147763874	+	hs|1q21.2	XR_110828	chr1:147763874-147763933	XR_110828	Hs.504540
A_33_P3267375	8.76305	3.13143	8.76305	up	sarcoglycan, delta (35kDa dystrophin-associated glycoprotein)	SGCD	FALSE	Homo sapiens sarcoglycan, delta (35kDa dystrophin-associated glycoprotein) (SGCD), transcript variant 1, mRNA [NM_000337]	6444	GO:0042383|GO:0005737|GO:0007517|GO:0016010|GO:0005886|GO:0016012|GO:0016021|GO:0005856	156193005	chr5	156192946	+	hs|5q33.3	NM_000337	chr5:156192946-156193005	NM_000337	Hs.387207
A_19_P00320434	8.75349	3.12986	8.75349	up	uncharacterized LOC100996579	LOC100996579	FALSE	Homo sapiens uncharacterized LOC100996579 (LOC100996579), transcript variant 1, long non-coding RNA [NR_110163]	100996579		162105071	chr2	162105012	+	hs|2q24.2	NR_110163	chr2:162105012-162105071	NR_110163	Hs.660929
A_23_P148204	8.7531	3.12979	8.7531	up	ubiquitin specific peptidase 47	USP47	FALSE	Homo sapiens ubiquitin specific peptidase 47 (USP47), transcript variant 2, mRNA [NM_017944]	55031	GO:0005515|GO:0006511|GO:0043066|GO:0004843|GO:0030307|GO:0042493|GO:0006974|GO:0005737|GO:0034644|GO:0010972|GO:0071987|GO:0006284|GO:0035520|GO:0043154|GO:0045892|GO:0019005	11977582	chr11	11976688	+	hs|11p15.3	NM_017944	chr11:11976688-11977582	NM_017944	Hs.577256
A_32_P116857	8.74874	3.12907	8.74874	up	phosphodiesterase 11A	PDE11A	FALSE	Homo sapiens phosphodiesterase 11A (PDE11A), transcript variant 4, mRNA [NM_016953]	50940	GO:0004114|GO:0004118|GO:0004112|GO:0047555|GO:0046069|GO:0005575|GO:0046872|GO:0005829|GO:0007165|GO:0030552|GO:0030553|GO:0007596|GO:0043204|GO:0006198	178489104	chr2	178489045	-	hs|2q31.2	NM_016953	chr2:178489104-178489045	NM_016953	Hs.570273
A_23_P160689	8.73405	3.12665	8.73405	up	ligand dependent nuclear receptor interacting factor 1	LRIF1	FALSE	Homo sapiens ligand dependent nuclear receptor interacting factor 1 (LRIF1), transcript variant 1, mRNA [NM_018372]	55791	GO:0005515|GO:0006355|GO:0005634|GO:0042974|GO:0015629|GO:0016363|GO:0006351	111490467	chr1	111490408	-	hs|1p13.3	NM_018372	chr1:111490467-111490408	NM_018372	Hs.25245
A_24_P135193	8.70314	3.12154	8.70314	up	UEV and lactate/malate dehyrogenase domains	UEVLD	FALSE	Homo sapiens UEV and lactate/malate dehyrogenase domains (UEVLD), transcript variant 2, mRNA [NM_018314]	55293	GO:0008150|GO:0003674|GO:0044262|GO:0015031|GO:0006464|GO:0070062|GO:0055114|GO:0016616	18586542	chr11	18586483	-	hs|11p15.1	NM_018314	chr11:18586542-18586483	NM_018314	Hs.407991
A_32_P142440	8.68088	3.11784	8.68088	up	proprotein convertase subtilisin/kexin type 9	PCSK9	FALSE	Homo sapiens proprotein convertase subtilisin/kexin type 9 (PCSK9), transcript variant 1, mRNA [NM_174936]	255738	GO:0005515|GO:0048471|GO:0016540|GO:0010469|GO:0004252|GO:0005783|GO:0070326|GO:0043621|GO:0005764|GO:0005615|GO:0043523|GO:0005737|GO:0043525|GO:0030182|GO:0034190|GO:0006508|GO:0001920|GO:0010989|GO:0022008|GO:0008203|GO:0009267|GO:0042632|GO:0005791|GO:0032869|GO:0005794|GO:0009986|GO:0005770|GO:0001822|GO:0030169|GO:0006915|GO:0031232|GO:0001889|GO:0032803|GO:0032802|GO:0019871|GO:0042157|GO:…	55530512	chr1	55530453	+	hs|1p32.3	NM_174936	chr1:55530453-55530512	NM_174936	Hs.18844
A_24_P303480	8.65855	3.11413	8.65855	up	RAB32, member RAS oncogene family	RAB32	FALSE	Homo sapiens RAB32, member RAS oncogene family (RAB32), mRNA [NM_006834]	10981	GO:0035650|GO:0005515|GO:0042470|GO:0035651|GO:0007264|GO:0035612|GO:0032438|GO:0005525|GO:0015031|GO:0032403|GO:0045335|GO:0005739|GO:0030742|GO:0031905|GO:0016020|GO:0019882|GO:0035646|GO:0030670|GO:0090382|GO:0005769	146875709	chr6	146875650	+	hs|6q24.3	NM_006834	chr6:146875650-146875709	NM_006834	Hs.287714
A_23_P63032	8.64468	3.11181	8.64468	up	guanylate cyclase activator 2B (uroguanylin)	GUCA2B	FALSE	Homo sapiens guanylate cyclase activator 2B (uroguanylin) (GUCA2B), mRNA [NM_007102]	2981	GO:0007589|GO:0007588|GO:0006182|GO:0031284|GO:0045776|GO:0070062|GO:0008048	42621237	chr1	42620510	+	hs|1p34.2	NM_007102	chr1:42620510-42621237	NM_007102	Hs.32966
A_24_P410408	8.59989	3.10432	8.59989	up	keratin 83	KRT83	FALSE	Homo sapiens keratin 83 (KRT83), mRNA [NM_002282]	3889	GO:0042633|GO:0008544|GO:0005198|GO:0007568|GO:0045095|GO:0005615	52710736	chr12	52710677	-	hs|12q13.13	NM_002282	chr12:52710736-52710677	NM_002282	Hs.720768
A_33_P3791263	8.57498	3.10013	8.57498	up	olfactomedin 3	OLFM3	FALSE	Homo sapiens olfactomedin 3 (OLFM3), transcript variant 3, mRNA [NM_001288823]	118427	GO:0005515|GO:0030054|GO:0005794|GO:0032281|GO:0045202|GO:0042462|GO:0005615	102269418	chr1	102269359	-	hs|1p21.1	NM_001288823	chr1:102269418-102269359	NM_001288823	Hs.484475
A_23_P6891	8.56169	3.0979	8.56169	up	eukaryotic translation initiation factor 1B	EIF1B	FALSE	Homo sapiens eukaryotic translation initiation factor 1B (EIF1B), mRNA [NM_005875]	10289	GO:0006446|GO:0003743|GO:0005575|GO:0006413	40353713	chr3	40353654	+	hs|3p22.1	NM_005875	chr3:40353654-40353713	NM_005875	Hs.315230
A_33_P3236117	8.55184	3.09623	8.55184	up			FALSE				163719667	chr3	163719608	-	hs|3q26.1		chr3:163719667-163719608
A_24_P407235	8.52201	3.09119	8.52201	up	cryptochrome circadian clock 1	CRY1	FALSE	Homo sapiens cryptochrome circadian clock 1 (CRY1), mRNA [NM_004075]	1407	GO:0005515|GO:0043130|GO:0003904|GO:2000001|GO:0006094|GO:0035257|GO:0005634|GO:0000989|GO:0005739|GO:0018298|GO:0005737|GO:0009882|GO:0003690|GO:0000166|GO:0033762|GO:0031397|GO:0043153|GO:0045744|GO:0019901|GO:0019902|GO:0009785|GO:0005730|GO:0001047|GO:0042593|GO:0000122|GO:2000323|GO:0003677|GO:0006351|GO:0032922|GO:0003914|GO:0006975|GO:0006281|GO:0042752|GO:0042754|GO:0045892	107385541	chr12	107385482	-	hs|12q23.3	NM_004075	chr12:107385541-107385482	NM_004075	Hs.151573
A_33_P3273266	8.50208	3.08782	8.50208	up	zinc finger protein 91 pseudogene	LOC441666	FALSE	Homo sapiens zinc finger protein 91 pseudogene (LOC441666), non-coding RNA [NR_024380]	441666		42833150	chr10	42833106	-	hs|10q11.21	NR_024380	chr10:42833150-42833106	NR_024380	Hs.255729
A_23_P333228	8.50027	3.08751	8.50027	up	membrane-associated ring finger (C3HC4) 4, E3 ubiquitin protein ligase	2017-03-04	FALSE	Homo sapiens membrane-associated ring finger (C3HC4) 4, E3 ubiquitin protein ligase (MARCH4), mRNA [NM_020814]	57574	GO:0005802|GO:0004842|GO:0016567|GO:0005795|GO:0000139|GO:0016874|GO:0008270|GO:0016021	217122655	chr2	217122596	-	hs|2q35	NM_020814	chr2:217122655-217122596	NM_020814	Hs.170388
A_24_P63537	8.49806	3.08713	8.49806	up	endoplasmic reticulum aminopeptidase 1	ERAP1	FALSE	Homo sapiens endoplasmic reticulum aminopeptidase 1 (ERAP1), transcript variant 1, mRNA [NM_016442]	51752	GO:0005138|GO:0005515|GO:0002474|GO:0005783|GO:0005576|GO:0001525|GO:0005151|GO:0005615|GO:0045766|GO:0005829|GO:0009617|GO:0019885|GO:0004177|GO:0045088|GO:0008235|GO:0008217|GO:0005789|GO:0045444|GO:0005788|GO:0008270|GO:0016021|GO:0006509|GO:0070062	96096605	chr5	96096546	-	hs|5q15	NM_016442	chr5:96096605-96096546	NM_016442	Hs.666524
A_33_P3404052	8.48685	3.08523	8.48685	up	tumor necrosis factor, alpha-induced protein 8	TNFAIP8	FALSE	Homo sapiens tumor necrosis factor, alpha-induced protein 8 (TNFAIP8), transcript variant 3, mRNA [NM_001286813]	25816	GO:0043066|GO:0005737|GO:0043154|GO:0043027	118729076	chr5	118729017	+	hs|5q23.1	NM_001286813	chr5:118729017-118729076	NM_001286813	Hs.656274
A_24_P481824	8.4822	3.08444	8.4822	up	dpy-19-like 4 (C. elegans)	DPY19L4	FALSE	Homo sapiens dpy-19-like 4 (C. elegans) (DPY19L4), mRNA [NM_181787]	286148	GO:0016757|GO:0008152|GO:0016021	95806038	chr8	95805979	+	hs|8q22.1	NM_181787	chr8:95805979-95806038	NM_181787	Hs.567828
A_24_P299318	8.47942	3.08397	8.47942	up	family with sequence similarity 101, member B	FAM101B	FALSE	Homo sapiens family with sequence similarity 101, member B (FAM101B), mRNA [NM_182705]	359845	GO:0030036|GO:0031005|GO:0001837|GO:0015629	289939	chr17	289880	-	hs|17p13.3	NM_182705	chr17:289939-289880	NM_182705	Hs.741149
A_23_P356965	8.47629	3.08343	8.47629	up	coiled-coil domain containing 57	CCDC57	FALSE	coiled-coil domain containing 57 [Source:HGNC Symbol;Acc:27564] [ENST00000327026]	284001		80111566	chr17	80111507	-	hs|17q25.3	AK125941	chr17:80111566-80111507		Hs.631724
A_19_P00806347	8.42463	3.07461	8.42463	up			FALSE				42077345	chr2	42077286	+	hs|2p21		chr2:042077286-042077345
A_23_P42718	8.42398	3.0745	8.42398	up	nuclear factor, erythroid 2-like 3	NFE2L3	FALSE	Homo sapiens nuclear factor, erythroid 2-like 3 (NFE2L3), mRNA [NM_004289]	9603	GO:0043565|GO:0006355|GO:0003700|GO:0006366|GO:0003713|GO:0005634	26225756	chr7	26225697	+	hs|7p15.2	NM_004289	chr7:26225697-26225756	NM_004289	Hs.404741
A_33_P3352098	8.416	3.07314	8.416	up	membrane-spanning 4-domains, subfamily A, member 7	MS4A7	FALSE	Homo sapiens membrane-spanning 4-domains, subfamily A, member 7 (MS4A7), transcript variant 1, mRNA [NM_021201]	58475	GO:0016021	60163338	chr11	60163279	+	hs|11q12.2	NM_021201	chr11:60163279-60163338	NM_021201	Hs.530735
A_19_P00806237	8.4092	3.07197	8.4092	up	PRKC, apoptosis, WT1, regulator	PAWR	FALSE	PRKC, apoptosis, WT1, regulator [Source:HGNC Symbol;Acc:8614] [ENST00000328827]	5074	GO:0005515|GO:0043065|GO:0008285|GO:0003714|GO:0005884|GO:0006915|GO:0030889|GO:0003779|GO:0005634|GO:0000122|GO:0097190|GO:0050860|GO:0006351|GO:0042986|GO:0042130|GO:0043522|GO:0042094|GO:0005737|GO:0019899|GO:0051017	79981814	chr12	79981755	-	hs|12q21.2	XM_006719435	chr12:79981814-79981755	XM_006719435
A_33_P3502037	8.39868	3.07016	8.39868	up	cysteine and histidine-rich domain (CHORD) containing 1	CHORDC1	FALSE	Homo sapiens cysteine and histidine-rich domain (CHORD) containing 1 (CHORDC1), transcript variant 1, mRNA [NM_012124]	26973	GO:0005515|GO:0061077|GO:0051879|GO:0006950|GO:0008270|GO:2000299|GO:0010824|GO:0005575|GO:1900034	89933613	chr11	89933582	-	hs|11q14.3	NM_012124	chr11:89933613-89933582	NM_012124	Hs.22857
A_23_P166306	8.38058	3.06705	8.38058	up	cystathionine-beta-synthase	CBS	FALSE	Homo sapiens cystathionine-beta-synthase (CBS), transcript variant 1, mRNA [NM_000071]	875	GO:0019343|GO:0005515|GO:0070814|GO:0019346|GO:0006801|GO:0006535|GO:0005634|GO:0044281|GO:0050667|GO:0046872|GO:0042803|GO:0005829|GO:0042802|GO:0072341|GO:0034641|GO:0050880|GO:0030554|GO:0060351|GO:0043506|GO:0004122|GO:0031625|GO:0043066|GO:0060135|GO:0071456|GO:0021587|GO:0051593|GO:0001958|GO:0000096|GO:0043418|GO:0001974|GO:0030170|GO:0006563|GO:0019899|GO:0006565|GO:0019448|GO:0020037|GO:…	44473378	chr21	44473319	-	hs|21q22.3	NM_000071	chr21:44473378-44473319	NM_000071	Hs.533013
A_33_P3267380	8.37348	3.06583	8.37348	up	sarcoglycan, delta (35kDa dystrophin-associated glycoprotein)	SGCD	FALSE	Homo sapiens sarcoglycan, delta (35kDa dystrophin-associated glycoprotein) (SGCD), transcript variant 2, mRNA [NM_172244]	6444	GO:0042383|GO:0005737|GO:0007517|GO:0016010|GO:0005886|GO:0016012|GO:0016021|GO:0005856	156184935	chr5	156184876	+	hs|5q33.3	NM_172244	chr5:156184876-156184935	NM_172244	Hs.387207
A_24_P77681	8.37196	3.06556	8.37196	up	poly(A) binding protein interacting protein 1	PAIP1	FALSE	Homo sapiens poly(A) binding protein interacting protein 1 (PAIP1), transcript variant 1, mRNA [NM_006451]	10605	GO:0005515|GO:0010467|GO:0016070|GO:0016071|GO:0003723|GO:0008494|GO:0045727|GO:0006413|GO:0005829|GO:0005737|GO:0048255|GO:0000289|GO:0000288	43533850	chr5	43529933	-	hs|5p12	NM_006451	chr5:43533850-43529933	NM_006451	Hs.482038
A_23_P255827	8.35917	3.06336	8.35917	up	tumor protein, translationally-controlled 1 pseudogene 8	TPT1P8	FALSE	Homo sapiens apoptosis inhibitor (FKSG2) mRNA, complete cds. [AF300871]	59347	GO:0006915	36746814	chr8	36746755	+	hs|8p11.23	AF300871	chr8:36746755-36746814
A_24_P152983	8.32167	3.05687	8.32167	up			FALSE				132279720	chr5	132279661	+	hs|5q31.1		chr5:132279661-132279720
A_23_P54953	8.31669	3.05601	8.31669	up	SAP30 binding protein	SAP30BP	FALSE	Homo sapiens SAP30 binding protein (SAP30BP), mRNA [NM_013260]	29115	GO:0005515|GO:0006355|GO:0006915|GO:0005634|GO:0010942|GO:0006351	73698623	chr17	73698564	+	hs|17q25.1	NM_013260	chr17:73698564-73698623	NM_013260	Hs.655088
A_23_P331700	8.30494	3.05397	8.30494	up	serine/arginine repetitive matrix 3	SRRM3	FALSE	Homo sapiens serine/arginine repetitive matrix 3 (SRRM3), transcript variant 1, mRNA [NM_001291831]	222183		75916275	chr7	75916216	+	hs|7q11.23	NM_001291831	chr7:75916216-75916275	NM_001291831	Hs.511025
A_23_P383819	8.2424	3.04306	8.2424	up	T-box 3	TBX3	FALSE	Homo sapiens T-box 3 (TBX3), transcript variant 2, mRNA [NM_016569]	6926	GO:0005515|GO:0035136|GO:0008284|GO:0060596|GO:0003700|GO:0003167|GO:0005634|GO:0030879|GO:0060931|GO:0045662|GO:0001947|GO:0030539|GO:0046884|GO:0030857|GO:0001085|GO:0060021|GO:0009887|GO:0048332|GO:0008595|GO:0010159|GO:0001102|GO:0043066|GO:0001568|GO:0006357|GO:0060412|GO:0007569|GO:2000648|GO:0000122|GO:0045787|GO:0001701|GO:0060923|GO:0006351|GO:0003151|GO:0043565|GO:0001501|GO:0032275|GO:…	115108899	chr12	115108840	-	hs|12q24.21	NM_016569	chr12:115108899-115108840	NM_016569	Hs.744016
A_33_P3348239	8.22084	3.03929	8.22084	up	fibrillin 1	FBN1	FALSE	Homo sapiens fibrillin 1 (FBN1), mRNA [NM_000138]	2200	GO:0005515|GO:0035583|GO:0035582|GO:0001822|GO:0005509|GO:0005578|GO:0001527|GO:0005576|GO:0005615|GO:0005604|GO:0031012|GO:0007507|GO:0001501|GO:0022617|GO:0030198|GO:0070062|GO:0005201	48700564	chr15	48700505	-	hs|15q21.1	NM_000138	chr15:48700564-48700505	NM_000138	Hs.591133
A_19_P00324582	8.21017	3.03741	8.21017	up			FALSE				26215714	chr1	26215655	+	hs|1p36.11		chr1:026215655-026215714
A_24_P225679	8.20921	3.03724	8.20921	up	insulin receptor substrate 1	IRS1	FALSE	Homo sapiens insulin receptor substrate 1 (IRS1), mRNA [NM_005544]	3667	GO:0005515|GO:0008286|GO:0010468|GO:0034504|GO:0008284|GO:0005886|GO:0005159|GO:0005158|GO:0043434|GO:0005634|GO:0030879|GO:0060397|GO:0043231|GO:0005829|GO:0010907|GO:0005737|GO:0043552|GO:0007173|GO:0046326|GO:0005899|GO:0005080|GO:0005068|GO:0004871|GO:0046676|GO:0042169|GO:0032868|GO:0048011|GO:0032869|GO:0030335|GO:0045725|GO:0048015|GO:0046627|GO:0046628|GO:0002053|GO:0042593|GO:0014065|GO:…	227600207	chr2	227600148	-	hs|2q36.3	NM_005544	chr2:227600207-227600148	NM_005544	Hs.471508
A_33_P3399755	8.19519	3.03478	8.19519	up	erythrocyte membrane protein band 4.2	EPB42	FALSE	erythrocyte membrane protein band 4.2 [Source:HGNC Symbol;Acc:3381] [ENST00000570199]	2038	GO:0005515|GO:0020027|GO:0005886|GO:0008360|GO:0048536|GO:0055072|GO:0005524|GO:0000902|GO:0018149|GO:0043249|GO:0003810|GO:0005200|GO:0030863|GO:0005856	43423226	chr15	43423167	-	hs|15q15.2		chr15:43423226-43423167
A_19_P00331683	8.18037	3.03217	8.18037	up			FALSE				86971080	chr7	86971021	+	hs|7q21.12		chr7:086971021-086971080
A_33_P3362641	8.15983	3.02854	8.15983	up	CDGSH iron sulfur domain 2	CISD2	FALSE	Homo sapiens CDGSH iron sulfur domain 2 (CISD2), mRNA [NM_001008388]	493856	GO:0005515|GO:0043234|GO:0000422|GO:0051537|GO:0005783|GO:0005789|GO:0010506|GO:0010259|GO:0005741|GO:0016021|GO:0046872|GO:0042803	103809725	chr4	103809666	+	hs|4q24	NM_001008388	chr4:103809666-103809725	NM_001008388	Hs.745013
A_23_P102017	8.15681	3.02801	8.15681	up	ermin, ERM-like protein	ERMN	FALSE	Homo sapiens ermin, ERM-like protein (ERMN), transcript variant 2, mRNA [NM_020711]	57471	GO:0008360|GO:0033270|GO:0030175|GO:0005737|GO:0031344|GO:0033269|GO:0051015|GO:0043209|GO:0043025|GO:0007015|GO:0005856|GO:0005938|GO:0070062|GO:0001763	158175610	chr2	158175551	-	hs|2q24.1	NM_020711	chr2:158175610-158175551	NM_020711	Hs.443894
A_19_P00330117	8.14604	3.0261	8.14604	up			FALSE				63096587	chr3	63096528	-	hs|3p14.2		chr3:063096587-063096528
A_33_P3413905	8.13592	3.0243	8.13592	up	adrenomedullin 2	ADM2	FALSE	Homo sapiens adrenomedullin 2 (ADM2), transcript variant 1, mRNA [NM_024866]	79924	GO:0010628|GO:0007631|GO:0005179|GO:0007586|GO:0006468|GO:0005576|GO:0045776|GO:0007189|GO:0001525|GO:0032403|GO:0045766	50924866	chr22	50924807	+	hs|22q13.33	NM_024866	chr22:50924807-50924866	NM_024866	Hs.449099
A_23_P161218	8.13352	3.02388	8.13352	up	ankyrin repeat domain 1 (cardiac muscle)	ANKRD1	FALSE	Homo sapiens ankyrin repeat domain 1 (cardiac muscle) (ANKRD1), mRNA [NM_014391]	27063	GO:0005515|GO:0042826|GO:0050714|GO:0071560|GO:0005634|GO:0044281|GO:0035914|GO:0005829|GO:0002039|GO:0005737|GO:0045944|GO:0071356|GO:0001085|GO:0055008|GO:0044255|GO:0005667|GO:0001105|GO:0043065|GO:0003714|GO:0045214|GO:0071456|GO:0070412|GO:0035994|GO:0000122|GO:0003677|GO:0035690|GO:0031432|GO:0071407|GO:0071222|GO:0071347|GO:0010976|GO:0043517|GO:2000279|GO:0005654|GO:0071260|GO:0031674	92672621	chr10	92672562	-	hs|10q23.31	NM_014391	chr10:92672621-92672562	NM_014391	Hs.448589
A_23_P9565	8.1197	3.02143	8.1197	up	RAB33B, member RAS oncogene family	RAB33B	FALSE	Homo sapiens RAB33B, member RAS oncogene family (RAB33B), mRNA [NM_031296]	83452	GO:0005794|GO:0000139|GO:0007264|GO:0005796|GO:2000156|GO:2000785|GO:0006914|GO:0015031|GO:0005525|GO:0070062	140396837	chr4	140396778	+	hs|4q31.1	NM_031296	chr4:140396778-140396837	NM_031296	Hs.591679
A_33_P3311267	8.08687	3.01558	8.08687	up	keratin associated protein 19-2	KRTAP19-2	FALSE	Homo sapiens keratin associated protein 19-2 (KRTAP19-2), mRNA [NM_181608]	337969	GO:0005882	31859568	chr21	31859509	-	hs|21q22.11	NM_181608	chr21:31859568-31859509	NM_181608	Hs.553692
A_33_P3369153	8.08447	3.01515	8.08447	up	kinesin family member 3C	KIF3C	FALSE	Homo sapiens kinesin family member 3C (KIF3C), mRNA [NM_002254]	3797	GO:0008017|GO:0019886|GO:0005871|GO:0003774|GO:0007596|GO:0008152|GO:0005874|GO:0003777|GO:0005524|GO:0007018|GO:0005829	26149514	chr2	26149455	-	hs|2p23.3	NM_002254	chr2:26149514-26149455	NM_002254	Hs.21611
A_33_P3411384	8.06353	3.01141	8.06353	up			FALSE
A_33_P3282390	8.06168	3.01108	8.06168	up	glutamate receptor, metabotropic 4	GRM4	FALSE	Homo sapiens glutamate receptor, metabotropic 4 (GRM4), transcript variant 1, mRNA [NM_000841]	2914	GO:0051966|GO:0005516|GO:0005886|GO:0004930|GO:0001642|GO:0007268|GO:0007196|GO:0031410|GO:0007269|GO:0005622|GO:0043523|GO:0042734|GO:0000187|GO:0043198|GO:0005887|GO:0043195|GO:0008066|GO:0007612|GO:0043410|GO:0048787|GO:0048306	33989744	chr6	33989685	-	hs|6p21.31	NM_000841	chr6:33989744-33989685	NM_000841	Hs.429018
A_32_P514599	8.0567	3.01019	8.0567	up			FALSE	HUMHSP60A chaperonin (HSP60) {Homo sapiens} (exp=-1; wgp=0; cg=0), partial (46%) [THC2537477]			36809424	chr3	36809365	-	hs|3p22.2		chr3:036809424-036809365
A_23_P91697	8.03792	3.00682	8.03792	up	like-glycosyltransferase	LARGE	FALSE	Homo sapiens like-glycosyltransferase (LARGE), transcript variant 1, mRNA [NM_004737]	9215	GO:0008375|GO:0030173|GO:0009101|GO:0016757|GO:0006688|GO:0006044|GO:0006486|GO:0046716	33669391	chr22	33669332	-	hs|22q12.3	NM_004737	chr22:33669391-33669332	NM_004737	Hs.474667
A_33_P3236868	7.98643	2.99755	7.98643	up	metallothionein 1X	MT1X	FALSE	Homo sapiens metallothionein 1X (MT1X), mRNA [NM_005952]	4501	GO:0071294|GO:0048471|GO:0005737|GO:0010038|GO:0008270|GO:0005634|GO:0071276|GO:0046872|GO:0045926|GO:0036018	56718021	chr16	56717962	+	hs|16q13	NM_005952	chr16:56717962-56718021	NM_005952	Hs.374950
A_23_P19663	7.95952	2.99268	7.95952	up	connective tissue growth factor	CTGF	FALSE	Homo sapiens connective tissue growth factor (CTGF), mRNA [NM_001901]	1490	GO:0060401|GO:0005515|GO:0005801|GO:0010467|GO:0070278|GO:0006367|GO:0045597|GO:0046330|GO:0001558|GO:0005615|GO:0035988|GO:0030154|GO:0043231|GO:0060548|GO:0070374|GO:0005938|GO:0010942|GO:0032355|GO:0044255|GO:0005520|GO:0005794|GO:0034059|GO:0051385|GO:0032330|GO:0043280|GO:0070542|GO:0005178|GO:0001503|GO:0008544|GO:0032967|GO:0008543|GO:0007229|GO:0001502|GO:0051496|GO:0008083|GO:0048471|GO:…	132270189	chr6	132270130	-	hs|6q23.2	NM_001901	chr6:132270189-132270130	NM_001901	Hs.410037
A_23_P209799	7.92086	2.98566	7.92086	up	myosin VIIB	MYO7B	FALSE	Homo sapiens myosin VIIB (MYO7B), mRNA [NM_001080527]	4648	GO:0016324|GO:0003774|GO:0008152|GO:0003779|GO:0016459|GO:0005524|GO:0070062	128394948	chr2	128394487	+	hs|2q14.3	NM_001080527	chr2:128394487-128394948	NM_001080527	Hs.154578
A_23_P146946	7.92014	2.98553	7.92014	up	cystatin E/M	CST6	FALSE	Homo sapiens cystatin E/M (CST6), mRNA [NM_001323]	1474	GO:0010951|GO:0004869|GO:0008544|GO:0009653|GO:0001533|GO:0070062	65780897	chr11	65780838	+	hs|11q13.1	NM_001323	chr11:65780838-65780897	NM_001323	Hs.139389
A_19_P00329806	7.91517	2.98462	7.91517	up	HOX transcript antisense RNA	HOTAIR	FALSE	Homo sapiens HOX transcript antisense RNA (HOTAIR), transcript variant 3, long non-coding RNA [NR_047518]	100124700		54356155	chr12	54356096	-	hs|12q13.13	NR_047518	chr12:54356155-54356096	NR_047518	Hs.197076
A_24_P374516	7.91473	2.98454	7.91473	up	thymosin beta 4, X-linked	TMSB4X	FALSE	Homo sapiens thymosin beta 4, X-linked (TMSB4X), mRNA [NM_021109]	7114	GO:0005515|GO:0042989|GO:0030036|GO:0007596|GO:0002576|GO:0030168|GO:0031093|GO:0005576|GO:0003779|GO:0005856	12994453	chrX	12994394	+	hs|Xp22.2	NM_021109	chrX:12994394-12994453	NM_021109	Hs.437277
A_23_P218608	7.90708	2.98314	7.90708	up	eukaryotic translation initiation factor 5B	EIF5B	FALSE	Homo sapiens eukaryotic translation initiation factor 5B (EIF5B), mRNA [NM_015904]	9669	GO:0006184|GO:0005515|GO:0010467|GO:0006446|GO:0003924|GO:0003743|GO:0005525|GO:0044267|GO:0006412|GO:0006413|GO:0005829	100016028	chr2	100015969	+	hs|2q11.2	NM_015904	chr2:100015969-100016028	NM_015904	Hs.158688
A_23_P318296	7.90665	2.98307	7.90665	up	pleckstrin homology domain containing, family A (phosphoinositide binding specific) member 8	PLEKHA8	FALSE	Homo sapiens pleckstrin homology domain containing, family A (phosphoinositide binding specific) member 8 (PLEKHA8), transcript variant 3, mRNA [NM_032639]	84725	GO:0005802|GO:0035621|GO:0051861|GO:0016020|GO:0017089|GO:0006869|GO:0097001|GO:0070273|GO:0046836|GO:0015031	30102352	chr7	30102293	+	hs|7p14.3	NM_032639	chr7:30102293-30102352	NM_032639	Hs.233495
A_19_P00329263	7.89163	2.98032	7.89163	up			FALSE				97001075	chr12	97001016	-	hs|12q23.1		chr12:097001075-097001016
A_33_P3319870	7.88983	2.97999	7.88983	up	gremlin 1, DAN family BMP antagonist	GREM1	FALSE	Homo sapiens gremlin 1, DAN family BMP antagonist (GREM1), transcript variant 2, mRNA [NM_001191323]	26585	GO:0005515|GO:0030308|GO:0001658|GO:0033689|GO:0005615|GO:0060676|GO:0051973|GO:0016015|GO:0030297|GO:0007171|GO:0030199|GO:0090191|GO:0048018|GO:0009986|GO:0090291|GO:0030502|GO:0005125|GO:2000727|GO:0072331|GO:1900155|GO:0043184|GO:1900158|GO:0090027|GO:0045892|GO:0042346|GO:0008284|GO:1900086|GO:0061098|GO:0002042|GO:0007267|GO:0010717|GO:0009954|GO:0030326|GO:0032872|GO:0060394|GO:2000273|GO:…	33025901	chr15	33025842	+	hs|15q13.3	NM_001191323	chr15:33025842-33025901	NM_001191323	Hs.40098
A_23_P64019	7.88897	2.97984	7.88897	up	myotubularin related protein 2	MTMR2	FALSE	Homo sapiens myotubularin related protein 2 (MTMR2), transcript variant 2, mRNA [NM_201278]	8898	GO:0005515|GO:0008219|GO:0030424|GO:0005634|GO:0044281|GO:0030425|GO:0035335|GO:0042803|GO:0005829|GO:0005737|GO:0006470|GO:0043197|GO:0048666|GO:0045806|GO:0004725|GO:0031642|GO:0005774|GO:0051262|GO:0006661|GO:2000643|GO:2000645|GO:0052866|GO:0008021|GO:0032288|GO:0097062|GO:0090394|GO:0031901|GO:0046855|GO:0097060|GO:0046856|GO:0008138|GO:0006644|GO:0002091	95567472	chr11	95567413	-	hs|11q21	NM_201278	chr11:95567472-95567413	NM_201278	Hs.181326
A_23_P502170	7.86847	2.97608	7.86847	up	dynein, cytoplasmic 2, light intermediate chain 1	DYNC2LI1	FALSE	Homo sapiens dynein, cytoplasmic 2, light intermediate chain 1 (DYNC2LI1), transcript variant 2, mRNA [NM_015522]	51626	GO:0005515|GO:0005881|GO:0007368|GO:0005930|GO:0045177|GO:0072372|GO:0031512|GO:0036064|GO:0005829|GO:0019886|GO:0042384|GO:0003774|GO:0008152|GO:0005858|GO:0030990	44021738	chr2	44021679	+	hs|2p21	NM_015522	chr2:44021679-44021738	NM_015522	Hs.371597
A_19_P00806882	7.86692	2.9758	7.86692	up			FALSE				235364259	chr2	235364200	-	hs|2q37.1		chr2:235364259-235364200
A_19_P00321089	7.86117	2.97474	7.86117	up	long intergenic non-protein coding RNA 963	LINC00963	FALSE	long intergenic non-protein coding RNA 963 [Source:HGNC Symbol;Acc:48716] [ENST00000419300]	100506190		132269134	chr9	132269075	+	hs|9q34.11	AK057050	chr9:132269075-132269134		Hs.529860
A_32_P473302	7.84966	2.97263	7.84966	up	VLDLR antisense RNA 1	VLDLR-AS1	FALSE	Homo sapiens VLDLR antisense RNA 1 (VLDLR-AS1), long non-coding RNA [NR_015375]	401491		2535721	chr9	2535662	-	hs|9p24.2	NR_015375	chr9:2535721-2535662	NR_015375	Hs.416043
A_24_P74070	7.83827	2.97053	7.83827	up	par-6 family cell polarity regulator gamma	PARD6G	FALSE	Homo sapiens par-6 family cell polarity regulator gamma (PARD6G), mRNA [NM_032510]	84552	GO:0005515|GO:0043234|GO:0007049|GO:0070830|GO:0005886|GO:0034329|GO:0005923|GO:0045216|GO:0051301|GO:0005829	77915404	chr18	77915345	-	hs|18q23	NM_032510	chr18:77915404-77915345	NM_032510	Hs.654920
A_19_P00325604	7.80849	2.96504	7.80849	up	long intergenic non-protein coding RNA, regulator of reprogramming	LINC-ROR	FALSE	Homo sapiens long intergenic non-protein coding RNA, regulator of reprogramming (LINC-ROR), long non-coding RNA [NR_048536]	100885779		54722409	chr18	54722350	-	hs|18q21.31		chr18:54722409-54722350	NR_048536	Hs.742426
A_24_P157424	7.79984	2.96345	7.79984	up	nuclear cap binding protein subunit 2, 20kDa	NCBP2	FALSE	Homo sapiens nuclear cap binding protein subunit 2, 20kDa (NCBP2), transcript variant 1, mRNA [NM_007362]	22916	GO:0005515|GO:0000339|GO:0008380|GO:0006369|GO:0010467|GO:0006368|GO:0006366|GO:0003723|GO:0031124|GO:0005634|GO:0031047|GO:0005829|GO:0005737|GO:0006406|GO:0000184|GO:0000166|GO:0006408|GO:0016032|GO:0000340|GO:0016070|GO:0008334|GO:0016071|GO:0045292|GO:0005730|GO:0006370|GO:0034660|GO:0000387|GO:0050434|GO:0000398|GO:0006446|GO:0005654|GO:0046833|GO:0005845|GO:0005846	196662523	chr3	196662464	-	hs|3q29	NM_007362	chr3:196662523-196662464	NM_007362	Hs.591671
A_24_P382319	7.78228	2.96019	7.78228	up	carcinoembryonic antigen-related cell adhesion molecule 1 (biliary glycoprotein)	CEACAM1	FALSE	Homo sapiens carcinoembryonic antigen-related cell adhesion molecule 1 (biliary glycoprotein) (CEACAM1), transcript variant 1, mRNA [NM_001712]	634	GO:0005515|GO:0003674|GO:0016477|GO:0016020|GO:0005886|GO:0007229|GO:0005887|GO:0016021|GO:0001525|GO:0007156|GO:0070062	43011563	chr19	43011504	-	hs|19q13.2	NM_001712	chr19:43011563-43011504	NM_001712	Hs.512682
A_32_P72110	7.76171	2.95637	7.76171	up	poliovirus receptor	PVR	FALSE	Homo sapiens poliovirus receptor (PVR), transcript variant 1, mRNA [NM_006505]	5817	GO:0005515|GO:0005886|GO:0009986|GO:0034329|GO:0009615|GO:0005615|GO:0045216|GO:0060370|GO:0005737|GO:0016337|GO:0016477|GO:0001618|GO:0050776|GO:0045954|GO:0042271|GO:0002860|GO:0016032|GO:0004872|GO:0016021|GO:0050839|GO:0070062|GO:0034332	45168422	chr19	45168363	+	hs|19q13.31	NM_006505	chr19:45168363-45168422	NM_006505	Hs.171844
A_19_P00812582	7.74952	2.95411	7.74952	up	taurine up-regulated 1 (non-protein coding)	TUG1	FALSE	Homo sapiens taurine up-regulated 1 (non-protein coding) (TUG1), transcript variant 1, long non-coding RNA [NR_110492]	55000		31374996	chr22	31374937	+	hs|22q12.2	NR_110492	chr22:31374937-31374996	NR_110492	Hs.554829
A_23_P48327	7.74362	2.95301	7.74362	up	potassium channel tetramerization domain containing 4	KCTD4	FALSE	Homo sapiens potassium channel tetramerization domain containing 4 (KCTD4), mRNA [NM_198404]	386618	GO:0051260	45767809	chr13	45767750	-	hs|13q14.12	NM_198404	chr13:45767809-45767750	NM_198404	Hs.23406
A_23_P50368	7.68915	2.94282	7.68915	up	osteoclast associated, immunoglobulin-like receptor	OSCAR	FALSE	Homo sapiens osteoclast associated, immunoglobulin-like receptor (OSCAR), transcript variant 1, mRNA [NM_206818]	126014	GO:0005886|GO:0016021|GO:0070062	54598157	chr19	54598098	-	hs|19q13.42	NM_206818	chr19:54598157-54598098	NM_206818	Hs.347655
A_33_P3252286	7.67239	2.93968	7.67239	up	cytokine receptor-like factor 1	CRLF1	FALSE	Homo sapiens cytokine receptor-like factor 1 (CRLF1), mRNA [NM_004750]	9244	GO:0005515|GO:0001657|GO:0008284|GO:0046982|GO:0042517|GO:2000672|GO:0005125|GO:0005615|GO:0005127|GO:0097058|GO:0043524|GO:0019955|GO:0004872	18704106	chr19	18704047	-	hs|19p13.11	NM_004750	chr19:18704106-18704047	NM_004750	Hs.114948
A_24_P208998	7.66729	2.93872	7.66729	up	tripartite motif containing 23	TRIM23	FALSE	Homo sapiens tripartite motif containing 23 (TRIM23), transcript variant alpha, mRNA [NM_001656]	373	GO:0005515|GO:0004842|GO:0016567|GO:0007264|GO:0016874|GO:0003924|GO:0005634|GO:0043085|GO:0005525|GO:0005765|GO:0042802|GO:0006184|GO:0000139|GO:0016032|GO:0008270|GO:0019003|GO:0008047|GO:0070062	64886092	chr5	64886033	-	hs|5q12.3	NM_001656	chr5:64886092-64886033	NM_001656	Hs.792
A_33_P3235184	7.65767	2.93691	7.65767	up			FALSE				15347393	chr17	15347334	+	hs|17p12		chr17:015347334-015347393
A_24_P412156	7.65515	2.93643	7.65515	up	chemokine (C-X-C motif) ligand 12	CXCL12	FALSE	Homo sapiens chemokine (C-X-C motif) ligand 12 (CXCL12), transcript variant 2, mRNA [NM_000609]	6387	GO:0008344|GO:0009408|GO:0008015|GO:0031100|GO:0048842|GO:0043434|GO:0090280|GO:0005615|GO:0007281|GO:0022029|GO:0006955|GO:0042098|GO:0006935|GO:0007155|GO:0070062|GO:0009314|GO:0001666|GO:0008009|GO:2000406|GO:0001569|GO:0008354|GO:0070098|GO:0001667|GO:0006874|GO:0005102|GO:0042379|GO:0005576|GO:0045236|GO:0009615|GO:0045785|GO:0009612|GO:0050930|GO:0007165|GO:0008045|GO:0001938|GO:0007186|GO:…	44865676	chr10	44865617	-	hs|10q11.21	NM_000609	chr10:44865676-44865617	NM_000609	Hs.522891
A_23_P158997	7.63773	2.93314	7.63773	up		XLOC_014512	FALSE	BROAD Institute lincRNA (XLOC_014512), lincRNA [TCONS_l2_00001912]			247353404	chr1	247353345	-	hs|1q44		chr1:247353404-247353345
A_33_P3311046	7.63067	2.93181	7.63067	up	olfactory receptor, family 2, subfamily M, member 7	OR2M7	FALSE	Homo sapiens olfactory receptor, family 2, subfamily M, member 7 (OR2M7), mRNA [NM_001004691]	391196	GO:0050911|GO:0004984|GO:0007186|GO:0005886|GO:0004930|GO:0016021	248486991	chr1	248486932	-	hs|1q44	NM_001004691	chr1:248486991-248486932	NM_001004691	Hs.530570
A_23_P38618	7.59884	2.92578	7.59884	up	phosphatidylinositol glycan anchor biosynthesis, class L	PIGL	FALSE	Homo sapiens phosphatidylinositol glycan anchor biosynthesis, class L (PIGL), mRNA [NM_004278]	9487	GO:0006501|GO:0016254|GO:0005789|GO:0016021|GO:0044267|GO:0006506|GO:0000225|GO:0043687	16229505	chr17	16229446	+	hs|17p11.2	NM_004278	chr17:16229446-16229505	NM_004278	Hs.499793
A_33_P3279526	7.55673	2.91776	7.55673	up			FALSE				21260402	chr7	21260343	-	hs|7p15.3		chr7:021260402-021260343
A_24_P824592	7.55041	2.91656	7.55041	up	RNA binding motif protein, X-linked	RBMX	FALSE	Homo sapiens RNA binding motif protein, X-linked (RBMX), transcript variant 1, mRNA [NM_002139]	27316	GO:0005515|GO:0008380|GO:0048026|GO:0010467|GO:0003727|GO:0048025|GO:0006366|GO:0003723|GO:0005634|GO:0071013|GO:0003729|GO:0005615|GO:0000166|GO:0044530|GO:0000381|GO:0045944|GO:0051260|GO:0006509|GO:0070062|GO:0005719|GO:0006376|GO:0001047|GO:0001649|GO:0016020|GO:0000398|GO:0003682|GO:0030529|GO:0071347|GO:0005654	135957662	chrX	135957516	-	hs|Xq26.3	NM_002139	chrX:135957662-135957516	NM_002139	Hs.380118
A_33_P3413741	7.53793	2.91417	7.53793	up	oxytocin receptor	OXTR	FALSE	Homo sapiens oxytocin receptor (OXTR), mRNA [NM_000916]	5021	GO:0005886|GO:0060406|GO:0043434|GO:0060206|GO:0045777|GO:0042220|GO:0007204|GO:0021537|GO:0007507|GO:0016324|GO:0006936|GO:0005913|GO:0001967|GO:0070474|GO:0004990|GO:0005000|GO:0060455|GO:0007613|GO:0070371|GO:0034097|GO:0032355|GO:0051965|GO:0042711|GO:0007565|GO:0042493|GO:0051968|GO:0034059|GO:0060137|GO:0048565|GO:0030431|GO:0010701|GO:0032230|GO:0042713|GO:0005902|GO:0001975|GO:0007186|GO:…	8792187	chr3	8792128	-	hs|3p25.3	NM_000916	chr3:8792187-8792128	NM_000916	Hs.2820
A_19_P00331209	7.50367	2.9076	7.50367	up			FALSE				153816251	chr5	153816192	+	hs|5q33.2		chr5:153816192-153816251
A_24_P944144	7.50234	2.90734	7.50234	up	death inducer-obliterator 1	DIDO1	FALSE	Homo sapiens death inducer-obliterator 1 (DIDO1), transcript variant 3, mRNA [NM_080797]	11083	GO:0005737|GO:0005819|GO:0008270|GO:0005634|GO:0097190|GO:0006351	61518663	chr20	61518604	-	hs|20q13.33	NM_080797	chr20:61518663-61518604	NM_080797	Hs.517172
A_33_P3238390	7.50114	2.90711	7.50114	up			FALSE				110474554	chr4	110474495	-	hs|4q25		chr4:110474554-110474495
A_23_P124892	7.47541	2.90215	7.47541	up	KiSS-1 metastasis-suppressor	KISS1	FALSE	Homo sapiens KiSS-1 metastasis-suppressor (KISS1), mRNA [NM_002256]	3814	GO:0005515|GO:0060124|GO:0043005|GO:0060112|GO:0008285|GO:0033686|GO:0005576|GO:0005615|GO:0005737|GO:0016324|GO:0031773|GO:0051482|GO:0050806|GO:0007010|GO:0043025|GO:0043410	204162029	chr1	204161970	-	hs|1q32.1	NM_002256	chr1:204162029-204161970	NM_002256	Hs.95008
A_33_P3416142	7.46601	2.90034	7.46601	up	MIR181A1 host gene (non-protein coding)	MIR181A1HG	FALSE	MIR181A1 host gene (non-protein coding) [Source:HGNC Symbol;Acc:48659] [ENST00000436880]	100131234		198868184	chr1	198868125	-	hs|1q32.1		chr1:198868184-198868125		Hs.711077
A_24_P264909	7.44474	2.89622	7.44474	up	Nedd4 family interacting protein 2	NDFIP2	FALSE	Homo sapiens Nedd4 family interacting protein 2 (NDFIP2), transcript variant 1, mRNA [NM_019080]	54602	GO:0005515|GO:0048471|GO:0005794|GO:0005783|GO:0050699|GO:0032410|GO:0032585|GO:0051224|GO:0043231|GO:0005739|GO:0007165|GO:0005737|GO:0000139|GO:0010629|GO:0031398|GO:0004871|GO:0016021|GO:0043123	80127919	chr13	80127860	+	hs|13q31.1	NM_019080	chr13:80127860-80127919	NM_019080	Hs.525093
A_23_P125233	7.4222	2.89185	7.4222	up	calponin 1, basic, smooth muscle	CNN1	FALSE	Homo sapiens calponin 1, basic, smooth muscle (CNN1), mRNA [NM_001299]	1264	GO:0005516|GO:0031032|GO:0003779|GO:0006940|GO:0005856	11661064	chr19	11661005	+	hs|19p13.2	NM_001299	chr19:11661005-11661064	NM_001299	Hs.465929
A_23_P65240	7.39982	2.88749	7.39982	up	collagen, type IV, alpha 1	COL4A1	FALSE	Homo sapiens collagen, type IV, alpha 1 (COL4A1), mRNA [NM_001845]	1282	GO:0005515|GO:0001569|GO:0048407|GO:0048514|GO:0005587|GO:0005576|GO:0030023|GO:0005604|GO:0061333|GO:0031012|GO:0061304|GO:0071230|GO:0022617|GO:0007411|GO:0007420|GO:0007528|GO:0030198|GO:0030855|GO:0030574|GO:0005788|GO:0071711|GO:0005201	110802406	chr13	110802347	-	hs|13q34	NM_001845	chr13:110802406-110802347	NM_001845	Hs.17441
A_24_P144784	7.38795	2.88517	7.38795	up	histone linker H1 domain, spermatid-specific 1, pseudogene	HILS1	FALSE	Homo sapiens histone linker H1 domain, spermatid-specific 1, pseudogene (HILS1), transcript variant 1, non-coding RNA [NR_024193]	373861	GO:0006342|GO:0006355|GO:0030261|GO:0006334|GO:0007275|GO:0007283|GO:0003676|GO:0003677|GO:0007281|GO:0006351|GO:0042393|GO:0006338|GO:0000786|GO:0001673	48248932	chr17	48248873	-	hs|17q21.33	NR_024193	chr17:48248932-48248873	NR_024193	Hs.25934
A_33_P3363305	7.37111	2.88188	7.37111	up			FALSE				71279807	chr11	71279748	+	hs|11q13.4		chr11:071279748-071279807
A_24_P23245	7.3606	2.87982	7.3606	up	NADH dehydrogenase (ubiquinone) 1 alpha subcomplex, 6, 14kDa	NDUFA6	FALSE	Homo sapiens NADH dehydrogenase (ubiquinone) 1 alpha subcomplex, 6, 14kDa (NDUFA6), mRNA [NM_002490]	4700	GO:0022904|GO:0031966|GO:0005747|GO:0006120|GO:0005743|GO:0044281|GO:0008137|GO:0006979|GO:0044237	42483077	chr22	42482273	-	hs|22q13.2	NM_002490	chr22:42483077-42482273	NM_002490	Hs.274416
A_33_P3514487	7.34901	2.87755	7.34901	up	V-set and transmembrane domain containing 1	VSTM1	FALSE	Homo sapiens V-set and transmembrane domain containing 1 (VSTM1), transcript variant 1, mRNA [NM_198481]	284415	GO:0016021|GO:0005615|GO:0005125|GO:0002376	54544173	chr19	54544114	-	hs|19q13.42	NM_198481	chr19:54544173-54544114	NM_198481	Hs.444431
A_23_P29067	7.34096	2.87597	7.34096	up	transmembrane protease, serine 2	TMPRSS2	FALSE	Homo sapiens transmembrane protease, serine 2 (TMPRSS2), transcript variant 2, mRNA [NM_005656]	7113	GO:0005515|GO:0016540|GO:0005886|GO:0004252|GO:0005887|GO:0006508|GO:0008236|GO:0046598|GO:0006898|GO:0070062|GO:0005044	42836963	chr21	42836904	-	hs|21q22.3	NM_005656	chr21:42836963-42836904	NM_005656	Hs.439309
A_19_P00807689	7.30705	2.86929	7.30705	up			FALSE				105564234	chr7	105564175	-	hs|7q22.3		chr7:105564234-105564175
A_33_P3275500	7.28976	2.86587	7.28976	up	uncharacterized LOC400743	LOC400743	FALSE	Homo sapiens cDNA FLJ45933 fis, clone PLACE7003639. [AK127830]	400743		17524092	chr1	17524033	+	hs|1p36.13		chr1:17524033-17524092		Hs.522935
A_24_P941759	7.28318	2.86457	7.28318	up	G2/M-phase specific E3 ubiquitin protein ligase	G2E3	FALSE	Homo sapiens G2/M-phase specific E3 ubiquitin protein ligase (G2E3), mRNA [NM_017769]	55632	GO:0000209|GO:0005737|GO:0004842|GO:0016874|GO:0001824|GO:0005730|GO:0006915|GO:0008270|GO:2001243	31088798	chr14	31088739	+	hs|14q12	NM_017769	chr14:31088739-31088798	NM_017769	Hs.509008
A_24_P320665	7.28004	2.86395	7.28004	up	family with sequence similarity 126, member A	FAM126A	FALSE	Homo sapiens family with sequence similarity 126, member A (FAM126A), mRNA [NM_032581]	84668	GO:0008150|GO:0007165|GO:0005737|GO:0005886|GO:0004871	22983499	chr7	22983440	-	hs|7p15.3	NM_032581	chr7:22983499-22983440	NM_032581	Hs.85603
A_33_P3242503	7.27597	2.86314	7.27597	up	zinc finger protein 365	ZNF365	FALSE	Homo sapiens zinc finger protein 365 (ZNF365), transcript variant C, mRNA [NM_199451]	22891	GO:0005515|GO:0005737|GO:0005815	64431771	chr10	64431712	+	hs|10q21.2	NM_199451	chr10:64431712-64431771	NM_199451	Hs.22653
A_33_P3227400	7.2754	2.86303	7.2754	up	collagen, type IV, alpha 4	COL4A4	FALSE	Homo sapiens collagen, type IV, alpha 4 (COL4A4), mRNA [NM_000092]	1286	GO:0022617|GO:0030198|GO:0007411|GO:0030574|GO:0005605|GO:0005587|GO:0005788|GO:0005576|GO:0032836|GO:0005201	227867523	chr2	227867464	-	hs|2q36.3	NM_000092	chr2:227867523-227867464	NM_000092	Hs.591645
A_19_P00800171	7.24836	2.85765	7.24836	up			FALSE				14661065	chr6	14661006	-	hs|6p23		chr6:014661065-014661006
A_23_P366394	7.24805	2.85759	7.24805	up	sterile alpha motif and leucine zipper containing kinase AZK	ZAK	FALSE	Homo sapiens sterile alpha motif and leucine zipper containing kinase AZK (ZAK), transcript variant 1, mRNA [NM_016653]	51776	GO:0009314|GO:0005515|GO:0008219|GO:0043065|GO:0000287|GO:0008283|GO:0006950|GO:0005634|GO:0007257|GO:0005524|GO:0030154|GO:0035556|GO:0000186|GO:0005737|GO:0004674|GO:0007010|GO:0000075|GO:0007050|GO:0006468|GO:0000077|GO:0004709	174132712	chr2	174132653	+	hs|2q31.1	NM_016653	chr2:174132653-174132712	NM_016653	Hs.444451
A_32_P135818	7.22728	2.85345	7.22728	up	ribosomal protein S3A	RPS3A	FALSE	Homo sapiens ribosomal protein S3A (RPS3A), transcript variant 1, mRNA [NM_001006]	6189	GO:0005515|GO:0010467|GO:0003723|GO:0019058|GO:0005634|GO:0006412|GO:0006413|GO:0030154|GO:0006414|GO:0005829|GO:0005737|GO:0002181|GO:0000184|GO:0016032|GO:0070062|GO:0043066|GO:0003735|GO:0016070|GO:0016071|GO:0006614|GO:0019083|GO:0005730|GO:0006415|GO:0022627|GO:0030529|GO:0044267	152024126	chr4	152024067	+	hs|4q31.3	NM_001006	chr4:152024067-152024126	NM_001006	Hs.356572
A_33_P3366053	7.21134	2.85027	7.21134	up	ADP-ribosylarginine hydrolase	ADPRH	FALSE	Homo sapiens ADP-ribosylarginine hydrolase (ADPRH), transcript variant 1, mRNA [NM_001125]	141	GO:0003875|GO:0000287|GO:0051725|GO:0006464	119308787	chr3	119308728	+	hs|3q13.33	NM_001125	chr3:119308728-119308787	NM_001125	Hs.99884
A_19_P00807117	7.19961	2.84792	7.19961	up			FALSE				120409984	chr4	120409925	+	hs|4q26		chr4:120409925-120409984
A_24_P662366	7.18358	2.8447	7.18358	up			FALSE				33259015	chr11	33258956	+	hs|11p13		chr11:033258956-033259015
A_24_P592012	7.14072	2.83607	7.14072	up	zinc finger and BTB domain containing 46	ZBTB46	FALSE	Homo sapiens zinc finger and BTB domain containing 46 (ZBTB46), mRNA [NM_025224]	140685	GO:0006355|GO:2001200|GO:0045656|GO:0030853|GO:0005634|GO:0003676|GO:0045650|GO:2001199|GO:0046872|GO:0006351	62375280	chr20	62375221	-	hs|20q13.33	NM_025224	chr20:62375280-62375221	NM_025224	Hs.585028
A_24_P419039	7.13209	2.83432	7.13209	up	protocadherin 19	PCDH19	FALSE	Homo sapiens protocadherin 19 (PCDH19), transcript variant 2, mRNA [NM_020766]	57526	GO:0005886|GO:0005509|GO:0016021|GO:0007156	99547090	chrX	99547031	-	hs|Xq22.1	NM_020766	chrX:99547090-99547031	NM_020766	Hs.4993
A_33_P3367681	7.12533	2.83296	7.12533	up			FALSE				108368747	chr11	108368688	+	hs|11q22.3		chr11:108368688-108368747
A_32_P4595	7.1236	2.83261	7.1236	up	sarcoglycan, delta (35kDa dystrophin-associated glycoprotein)	SGCD	FALSE	Homo sapiens sarcoglycan, delta (35kDa dystrophin-associated glycoprotein) (SGCD), transcript variant 1, mRNA [NM_000337]	6444	GO:0042383|GO:0005737|GO:0007517|GO:0016010|GO:0005886|GO:0016012|GO:0016021|GO:0005856	156194364	chr5	156194305	+	hs|5q33.3	NM_000337	chr5:156194305-156194364	NM_000337	Hs.387207
A_24_P225635	7.11295	2.83045	7.11295	up	heterogeneous nuclear ribonucleoprotein L-like	HNRNPLL	FALSE	heterogeneous nuclear ribonucleoprotein L-like [Source:HGNC Symbol;Acc:25127] [ENST00000449105]	92906	GO:0006397|GO:0005515|GO:0000166|GO:0030529|GO:0005634|GO:0003729|GO:0033120	38789997	chr2	38789938	-	hs|2p22.1	XM_005264639	chr2:38789997-38789938	XM_005264639
A_23_P150064	7.0732	2.82236	7.0732	up	multimerin 2	MMRN2	FALSE	Homo sapiens multimerin 2 (MMRN2), mRNA [NM_024756]	79812	GO:0030948|GO:0005515|GO:0090051|GO:0001525|GO:0005615|GO:0070062|GO:0005604	88696220	chr10	88696161	-	hs|10q23.2	NM_024756	chr10:88696220-88696161	NM_024756	Hs.524479
A_24_P522631	7.07078	2.82187	7.07078	up	transmembrane protein 201	TMEM201	FALSE	Homo sapiens transmembrane protein 201 (TMEM201), transcript variant 1, mRNA [NM_001130924]	199953	GO:0005637|GO:0016021	9674716	chr1	9674658	+	hs|1p36.22	NM_001130924	chr1:9674658-9674716	NM_001130924	Hs.632365
A_19_P00329612	7.05483	2.81861	7.05483	up			FALSE				112860341	chrX	112860282	-	hs|Xq23		chrX:112860341-112860282
A_23_P207981	7.04836	2.81729	7.04836	up	suppressor of cytokine signaling 6	SOCS6	FALSE	Homo sapiens suppressor of cytokine signaling 6 (SOCS6), mRNA [NM_004232]	9306	GO:0005515|GO:0001772|GO:0005737|GO:0016567|GO:0050868|GO:0006952|GO:0009968|GO:0007259|GO:0040008|GO:0010498	67993950	chr18	67993891	+	hs|18q22.2	NM_004232	chr18:67993891-67993950	NM_004232	Hs.44439
A_19_P00315543	7.04762	2.81714	7.04762	up	uncharacterized LOC100132354	LOC100132354	FALSE	Homo sapiens uncharacterized LOC100132354 (LOC100132354), long non-coding RNA [NR_024478]	100132354		43905627	chr6	43905568	+	hs|6p21.1		chr6:43905568-43905627	NR_024478	Hs.376232
A_24_P375683	7.04298	2.81618	7.04298	up			FALSE				121213081	chr3	121213021	+	hs|3q13.33		chr3:121213021-121213081
A_32_P98502	7.02441	2.81238	7.02441	up	cytochrome c oxidase subunit Va	COX5A	FALSE	Homo sapiens cytochrome c oxidase subunit Va (COX5A), mRNA [NM_004255]	9377	GO:0022904|GO:0004129|GO:0005743|GO:0009055|GO:0044281|GO:0046872|GO:0044237|GO:0070062	75212695	chr15	75212636	-	hs|15q24.2	NM_004255	chr15:75212695-75212636	NM_004255	Hs.401903
A_33_P3280930	7.01933	2.81133	7.01933	up	small nucleolar RNA host gene 6 (non-protein coding)	SNHG6	FALSE	Homo sapiens small nucleolar RNA host gene 6 (non-protein coding) (SNHG6), long non-coding RNA [NR_002599]	641638		67834344	chr8	67834285	-	hs|8q13.1	NR_002599	chr8:67834344-67834285	NR_002599	Hs.372680
A_23_P252764	7.0098	2.80937	7.0098	up	SWI/SNF related, matrix associated, actin dependent regulator of chromatin, subfamily a, member 2	SMARCA2	FALSE	Homo sapiens SWI/SNF related, matrix associated, actin dependent regulator of chromatin, subfamily a, member 2 (SMARCA2), transcript variant 2, mRNA [NM_139045]	6595	GO:0005515|GO:0071565|GO:0000790|GO:0030308|GO:0008285|GO:0006200|GO:0044212|GO:0005634|GO:0035887|GO:0071564|GO:0043231|GO:0042393|GO:0016514|GO:0045944|GO:0006338|GO:0045111|GO:0008094|GO:0001105|GO:0006355|GO:0006357|GO:0003713|GO:0005730|GO:0004386|GO:0000122|GO:0005524|GO:0006351|GO:0007399|GO:0005654|GO:0045893|GO:0045892	2161777	chr9	2161718	+	hs|9p24.3	NM_139045	chr9:2161718-2161777	NM_139045	Hs.298990
A_24_P415845	7.00116	2.80759	7.00116	up	ligase IV, DNA, ATP-dependent	LIG4	FALSE	Homo sapiens ligase IV, DNA, ATP-dependent (LIG4), transcript variant 1, mRNA [NM_002312]	3981	GO:0005515|GO:0000793|GO:0000012|GO:0051276|GO:0010165|GO:0005886|GO:0008283|GO:0016874|GO:0003909|GO:0005634|GO:0048146|GO:0051402|GO:0006303|GO:0046872|GO:0006302|GO:0006273|GO:0043524|GO:0005737|GO:0050769|GO:0016032|GO:0002328|GO:0006297|GO:0005958|GO:0035019|GO:0010332|GO:0071285|GO:0033077|GO:0033151|GO:0033152|GO:0033153|GO:0045190|GO:0005730|GO:0003910|GO:0007417|GO:0008022|GO:0005524|GO:…	108860815	chr13	108860756	-	hs|13q33.3	NM_002312	chr13:108860815-108860756	NM_002312	Hs.166091
A_24_P355267	7.00082	2.80752	7.00082	up	solute carrier family 25 (mitochondrial carrier; phosphate carrier), member 25	SLC25A25	FALSE	Homo sapiens solute carrier family 25 (mitochondrial carrier; phosphate carrier), member 25 (SLC25A25), transcript variant 2, mRNA [NM_001006641]	114789	GO:0014823|GO:0046034|GO:0005509|GO:0005743|GO:0002021|GO:0032094|GO:0043231|GO:0005739|GO:0045333|GO:0035264|GO:0070588|GO:0043010|GO:0016021|GO:0060612|GO:0070062	130871494	chr9	130871435	+	hs|9q34.11	NM_001006641	chr9:130871435-130871494	NM_001006641	Hs.5476
A_24_P357518	6.99979	2.80731	6.99979	up	ribosomal protein L21	RPL21	FALSE	Homo sapiens ribosomal protein L21 (RPL21), mRNA [NM_000982]	6144	GO:0010467|GO:0003735|GO:0016070|GO:0016071|GO:0019083|GO:0003723|GO:0006614|GO:0019058|GO:0005730|GO:0006415|GO:0006412|GO:0006413|GO:0005829|GO:0006414|GO:0005737|GO:0000184|GO:0016032|GO:0022625|GO:0044267	27829389	chr13	27828370	+	hs|13q12.2	NM_000982	chr13:27828370-27829389	NM_000982	Hs.381123
A_32_P157965	6.99678	2.80669	6.99678	up	eukaryotic translation initiation factor 2, subunit 2 beta, 38kDa	EIF2S2	FALSE	Homo sapiens eukaryotic translation initiation factor 2, subunit 2 beta, 38kDa (EIF2S2), mRNA [NM_003908]	8894	GO:0005515|GO:0005850|GO:0010467|GO:0002176|GO:0003723|GO:0003743|GO:0001701|GO:0006412|GO:0046872|GO:0006413|GO:0005829|GO:0044267|GO:0008135|GO:0008584	32681481	chr20	32678350	-	hs|20q11.22	NM_003908	chr20:32681481-32678350	NM_003908	Hs.429180
A_19_P00809428	6.98731	2.80474	6.98731	up	cancer susceptibility candidate 15 (non-protein coding)	CASC15	FALSE	cancer susceptibility candidate 15 (non-protein coding) [Source:HGNC Symbol;Acc:28245] [ENST00000606197]	401237		22147434	chr6	22147375	+	hs|6p22.3	AK094718	chr6:22147375-22147434		Hs.712707
A_23_P82588	6.98514	2.80429	6.98514	up	chromosome 7 open reading frame 55	C7orf55	FALSE	Homo sapiens chromosome 7 open reading frame 55 (C7orf55), transcript variant 1, mRNA [NM_197964]	154791	GO:0005739	139030525	chr7	139030466	+	hs|7q34	NM_197964	chr7:139030466-139030525	NM_197964	Hs.718441
A_24_P176493	6.98468	2.80419	6.98468	up	ATM interactor	ATMIN	FALSE	Homo sapiens ATM interactor (ATMIN), mRNA [NM_015251]	23300	GO:0005515|GO:0045502|GO:0044212|GO:0005634|GO:0045893|GO:0046872|GO:0006974|GO:0006351	81080774	chr16	81080715	+	hs|16q23.2	NM_015251	chr16:81080715-81080774	NM_015251	Hs.16349
A_24_P288993	6.96934	2.80102	6.96934	up			FALSE				43901362	chr4	43901303	+	hs|4p13		chr4:043901303-043901362
A_24_P231025	6.96588	2.80031	6.96588	up	bromodomain and WD repeat domain containing 1	BRWD1	FALSE	Homo sapiens bromodomain and WD repeat domain containing 1 (BRWD1), transcript variant 2, mRNA [NM_033656]	54014	GO:0003674|GO:0005737|GO:0006357|GO:0008360|GO:0007010|GO:0005634|GO:0006351	40562878	chr21	40562819	-	hs|21q22.2	NM_033656	chr21:40562878-40562819	NM_033656	Hs.654740
A_23_P250516	6.93928	2.79479	6.93928	up	uncharacterized LOC101928710	LOC101928710	FALSE	Homo sapiens uncharacterized LOC101928710 (LOC101928710), transcript variant 1, long non-coding RNA [NR_110848]	101928710		76613698	chr17	76613639	-	hs|17q25.3	NR_110848	chr17:76613698-76613639	NR_110848
A_32_P103837	6.87116	2.78055	6.87116	up	family with sequence similarity 60, member A	FAM60A	FALSE	Homo sapiens family with sequence similarity 60, member A (FAM60A), transcript variant 2, mRNA [NM_021238]	58516	GO:0005515|GO:0030336|GO:0016580	31433650	chr12	31433591	-	hs|12p11.21	NM_021238	chr12:31433650-31433591	NM_021238	Hs.505154
A_24_P143653	6.8695	2.78021	6.8695	up		XLOC_014512	FALSE	BROAD Institute lincRNA (XLOC_014512), lincRNA [TCONS_l2_00013981]			130751512	chr2	130751451	+	hs|2q21.1		chr2:130751451-130751512
A_23_P98205	6.86246	2.77873	6.86246	up	carbohydrate (keratan sulfate Gal-6) sulfotransferase 1	CHST1	FALSE	Homo sapiens carbohydrate (keratan sulfate Gal-6) sulfotransferase 1 (CHST1), mRNA [NM_003654]	8534	GO:0006790|GO:0005976|GO:0005975|GO:0044281|GO:0042339|GO:0006954|GO:0045130|GO:0000139|GO:0018146|GO:0008146|GO:0016021|GO:0006012|GO:0030203	45671095	chr11	45671036	-	hs|11p11.2	NM_003654	chr11:45671095-45671036	NM_003654	Hs.104576
A_23_P218505	6.86176	2.77858	6.86176	up	luteinizing hormone beta polypeptide	LHB	FALSE	Homo sapiens luteinizing hormone beta polypeptide (LHB), mRNA [NM_000894]	3972	GO:0007165|GO:0016486|GO:0006701|GO:0005179|GO:0007267|GO:0005102|GO:0005576|GO:0044267|GO:0008584|GO:0070062	49519464	chr19	49519405	-	hs|19q13.33	NM_000894	chr19:49519464-49519405	NM_000894	Hs.154704
A_23_P311232	6.83208	2.77232	6.83208	up	cytoplasmic linker associated protein 1	CLASP1	FALSE	Homo sapiens cytoplasmic linker associated protein 1 (CLASP1), transcript variant 1, mRNA [NM_015282]	23332	GO:0005828|GO:0005515|GO:0008017|GO:0005881|GO:0030981|GO:0034453|GO:0001578|GO:0051294|GO:0005829|GO:0051010|GO:0007411|GO:0000086|GO:0031023|GO:0005876|GO:0005938|GO:0070062|GO:0010458|GO:0005813|GO:0005794|GO:0031111|GO:0000226|GO:0007163|GO:0007020|GO:0000777|GO:0007026|GO:0000776|GO:0043515|GO:0000278|GO:0031592|GO:0051301	122095736	chr2	122095677	-	hs|2q14.2	NM_015282	chr2:122095736-122095677	NM_015282	Hs.469840
A_33_P3353502	6.81974	2.76972	6.81974	up	phospholipase C, beta 4	PLCB4	FALSE	Homo sapiens phospholipase C, beta 4 (PLCB4), transcript variant 2, mRNA [NM_182797]	5332	GO:0043647|GO:0005509|GO:0014069|GO:0005634|GO:0044281|GO:0030425|GO:0005790|GO:0005829|GO:0016042|GO:0035556|GO:0004629|GO:0004435|GO:0004871	9319684	chr20	9319625	+	hs|20p12.2	NM_182797	chr20:9319625-9319684	NM_182797	Hs.472101
A_24_P66679	6.81659	2.76905	6.81659	up	N(alpha)-acetyltransferase 30, NatC catalytic subunit	NAA30	FALSE	Homo sapiens N(alpha)-acetyltransferase 30, NatC catalytic subunit (NAA30), mRNA [NM_001011713]	122830	GO:0005515|GO:0031417|GO:0005737|GO:0004596|GO:0008152|GO:0005844	57877631	chr14	57877572	+	hs|14q22.3	NM_001011713	chr14:57877572-57877631	NM_001011713	Hs.165465
A_33_P3380161	6.80536	2.76667	6.80536	up	HNRNPU antisense RNA 1	HNRNPU-AS1	FALSE	Homo sapiens HNRNPU antisense RNA 1 (HNRNPU-AS1), long non-coding RNA [NR_026778]	284702		245004000	chr1	245003941	-	hs|1q44	NR_026778	chr1:245004000-245003941	NR_026778	Hs.743421
A_32_P83845	6.80355	2.76629	6.80355	up	hes-related family bHLH transcription factor with YRPW motif 1	HEY1	FALSE	Homo sapiens hes-related family bHLH transcription factor with YRPW motif 1 (HEY1), transcript variant 2, mRNA [NM_001040708]	23462	GO:0005515|GO:0000988|GO:2001212|GO:0035912|GO:0003700|GO:0000983|GO:0006366|GO:0003184|GO:0005634|GO:2000678|GO:0060317|GO:0061314|GO:0005737|GO:0007219|GO:0009948|GO:0045944|GO:0003222|GO:0060716|GO:0046983|GO:2000820|GO:0045746|GO:0003199|GO:0003198|GO:0060412|GO:0060411|GO:0060842|GO:0003203|GO:0001525|GO:0000122|GO:0003208|GO:0003190|GO:0035939|GO:0071385|GO:0060347|GO:0045669|GO:0002076|GO:…	80676371	chr8	80676312	-	hs|8q21.13	NM_001040708	chr8:80676371-80676312	NM_001040708	Hs.234434
A_23_P49674	6.7963	2.76475	6.7963	up	Rho guanine nucleotide exchange factor (GEF) 15	ARHGEF15	FALSE	Homo sapiens Rho guanine nucleotide exchange factor (GEF) 15 (ARHGEF15), transcript variant 1, mRNA [NM_173728]	22899	GO:0043547|GO:0005515|GO:0050790|GO:2000297|GO:0061299|GO:0032319|GO:0005089|GO:0030425|GO:0005096	8225003	chr17	8224944	+	hs|17p13.1	NM_173728	chr17:8224944-8225003	NM_173728	Hs.443109
A_19_P00800474	6.77228	2.75964	6.77228	up			FALSE	Homo sapiens cDNA FLJ12279 fis, clone MAMMA1001743, weakly similar to Y BOX BINDING PROTEIN-1. [AK022341]			151826916	chr7	151826857	+	hs|7q36.1	AK022341	chr7:151826857-151826916		Hs.649979
A_23_P210581	6.76386	2.75785	6.76386	up	potassium voltage-gated channel, subfamily G, member 1	KCNG1	FALSE	Homo sapiens potassium voltage-gated channel, subfamily G, member 1 (KCNG1), mRNA [NM_002237]	3755	GO:0005251|GO:0005886|GO:0008076|GO:0007268|GO:0005267|GO:0051260|GO:0034765|GO:0006813|GO:0071805|GO:0043231	49620322	chr20	49620263	-	hs|20q13.13	NM_002237	chr20:49620322-49620263	NM_002237	Hs.118695
A_33_P3243449	6.73097	2.75081	6.73097	up	CD70 molecule	CD70	FALSE	Homo sapiens CD70 molecule (CD70), mRNA [NM_001252]	970	GO:0005515|GO:0005164|GO:0005886|GO:0008283|GO:0005102|GO:0007267|GO:0097191|GO:0002020|GO:0005125|GO:0005615|GO:0007165|GO:0006955|GO:0005887|GO:0070062	6585926	chr19	6585867	-	hs|19p13.3	NM_001252	chr19:6585926-6585867	NM_001252	Hs.501497
A_23_P372834	6.72663	2.74988	6.72663	up	aquaporin 1 (Colton blood group)	AQP1	FALSE	Homo sapiens aquaporin 1 (Colton blood group) (AQP1), transcript variant 1, mRNA [NM_198098]	358	GO:0005515|GO:0015079|GO:0020003|GO:0070301|GO:0071732|GO:0071300|GO:0020005|GO:0030157|GO:0031526|GO:0035377|GO:0006884|GO:0034644|GO:0009925|GO:0015793|GO:0072488|GO:0006833|GO:0070062|GO:0005223|GO:0071474|GO:0031965|GO:0030950|GO:0071288|GO:0015696|GO:0071472|GO:0005267|GO:0033554|GO:0035378|GO:0035379|GO:0046878|GO:0005887|GO:0006182|GO:0085018|GO:0015701|GO:0071241|GO:0071280|GO:0005886|GO:…	30965115	chr7	30965057	+	hs|7p14.3	NM_198098	chr7:30965057-30965115	NM_198098	Hs.76152
A_24_P393958	6.71583	2.74757	6.71583	up	DnaJ (Hsp40) homolog, subfamily B, member 4	DNAJB4	FALSE	Homo sapiens DnaJ (Hsp40) homolog, subfamily B, member 4 (DNAJB4), mRNA [NM_007034]	11080	GO:0006986|GO:0005515|GO:0005737|GO:0009408|GO:0005886|GO:0006457|GO:0051087|GO:0005730|GO:0005634|GO:0051082|GO:0070062|GO:0005829	78482092	chr1	78482033	+	hs|1p31.1	NM_007034	chr1:78482033-78482092	NM_007034	Hs.13852
A_24_P313109	6.70749	2.74577	6.70749	up	ubiquitin-fold modifier 1	UFM1	FALSE	Homo sapiens ubiquitin-fold modifier 1 (UFM1), transcript variant 1, mRNA [NM_016617]	51569	GO:0034976|GO:0005737|GO:0071569|GO:0005634|GO:0070062	38936086	chr13	38936027	+	hs|13q13.3	NM_016617	chr13:38936027-38936086	NM_016617	Hs.643655
A_19_P00321151	6.70309	2.74483	6.70309	up	long intergenic non-protein coding RNA 964	LINC00964	FALSE	long intergenic non-protein coding RNA 964 [Source:HGNC Symbol;Acc:27226] [ENST00000528090]	157381		125861578	chr8	125861519	+	hs|8q24.13	BX110954	chr8:125861519-125861578		Hs.738264
A_23_P401606	6.69864	2.74387	6.69864	up	EGF-like repeats and discoidin I-like domains 3	EDIL3	FALSE	Homo sapiens EGF-like repeats and discoidin I-like domains 3 (EDIL3), transcript variant 1, mRNA [NM_005711]	10085	GO:0005178|GO:0010811|GO:0005509|GO:0007275|GO:0007155|GO:0070062	83238522	chr5	83238463	-	hs|5q14.3	NM_005711	chr5:83238522-83238463	NM_005711	Hs.482730
A_24_P286898	6.69238	2.74252	6.69238	up	mitogen-activated protein kinase 8	MAPK8	FALSE	Homo sapiens mitogen-activated protein kinase 8 (MAPK8), transcript variant JNK1-b2, mRNA [NM_001278547]	5599	GO:0005515|GO:0051403|GO:0002756|GO:0004705|GO:1900740|GO:0018105|GO:0018107|GO:0002755|GO:0009411|GO:0035033|GO:0038124|GO:0038123|GO:0034134|GO:0006950|GO:0002224|GO:0001503|GO:0045087|GO:0005654|GO:0034166|GO:0035666|GO:0034162|GO:0038095|GO:0046686|GO:0032091|GO:0034142|GO:0042826|GO:2001235|GO:0005634|GO:0005829|GO:0032880|GO:0005739|GO:0051090|GO:0034138|GO:0043066|GO:0048011|GO:0043065|GO:…	49647064	chr10	49647005	+	hs|10q11.22	NM_001278547	chr10:49647005-49647064	NM_001278547	Hs.138211
A_24_P93452	6.69182	2.7424	6.69182	up			FALSE				118432080	chr11	118432021	+	hs|11q23.3		chr11:118432021-118432080
A_33_P3413815	6.67832	2.73949	6.67832	up	laminin, beta 2 pseudogene 1	LAMB2P1	FALSE	Homo sapiens laminin, beta 2 pseudogene 1 (LAMB2P1), non-coding RNA [NR_004405]	22973		49190351	chr3	49190292	-	hs|3p21.31	NR_004405	chr3:49190351-49190292	NR_004405	Hs.607092
A_33_P3251771	6.67226	2.73818	6.67226	up	cylindromatosis (turban tumor syndrome)	CYLD	FALSE	Homo sapiens cylindromatosis (turban tumor syndrome) (CYLD), transcript variant 1, mRNA [NM_015247]	1540	GO:0005515|GO:0006511|GO:0005881|GO:2001238|GO:0042347|GO:0048471|GO:0004843|GO:0070423|GO:0005634|GO:0035872|GO:0005829|GO:0002181|GO:0070536|GO:2001242|GO:0016055|GO:0090090|GO:0032480|GO:0070064|GO:0005813|GO:0003735|GO:0070266|GO:0019901|GO:0005730|GO:0030496|GO:0032088|GO:0031234|GO:0070507|GO:0007346|GO:0007049|GO:0045087|GO:0008270	50835792	chr16	50835733	+	hs|16q12.1	NM_015247	chr16:50835733-50835792	NM_015247	Hs.578973
A_24_P239606	6.66352	2.73628	6.66352	up	growth arrest and DNA-damage-inducible, beta	GADD45B	FALSE	Homo sapiens growth arrest and DNA-damage-inducible, beta (GADD45B), mRNA [NM_015675]	4616	GO:0005515|GO:0043065|GO:0006950|GO:0046330|GO:0006915|GO:0005634|GO:0007275|GO:0030154|GO:0000186|GO:0005737|GO:0000185|GO:1900745|GO:0051726|GO:0006469	2478237	chr19	2478178	+	hs|19p13.3	NM_015675	chr19:2478178-2478237	NM_015675	Hs.110571
A_23_P217845	6.65996	2.73551	6.65996	up	regulator of G-protein signaling 16	RGS16	FALSE	Homo sapiens regulator of G-protein signaling 16 (RGS16), mRNA [NM_002928]	6004	GO:0043547|GO:0005515|GO:0005516|GO:0005737|GO:0008277|GO:0005886|GO:0038032|GO:0007601|GO:0005096	182571177	chr1	182571118	-	hs|1q25.3	NM_002928	chr1:182571177-182571118	NM_002928	Hs.413297
A_23_P138253	6.6589	2.73528	6.6589	up	chromatin target of PRMT1	CHTOP	FALSE	Homo sapiens chromatin target of PRMT1 (CHTOP), transcript variant 1, mRNA [NM_015607]	26097	GO:0005515|GO:0006355|GO:0006406|GO:0016607|GO:0000346|GO:0051096|GO:0005730|GO:0032781|GO:0006351	153617838	chr1	153617779	+	hs|1q21.3	NM_015607	chr1:153617779-153617838	NM_015607	Hs.611057
A_19_P00331673	6.65881	2.73527	6.65881	up			FALSE				87090469	chr16	87090410	+	hs|16q24.1		chr16:087090410-087090469
A_19_P00320469	6.6492	2.73318	6.6492	up	VLDLR antisense RNA 1	VLDLR-AS1	FALSE	Homo sapiens VLDLR antisense RNA 1 (VLDLR-AS1), long non-coding RNA [NR_015375]	401491		2535731	chr9	2535672	-	hs|9p24.2	NR_015375	chr9:2535731-2535672	NR_015375	Hs.416043
A_33_P3262694	6.63429	2.72994	6.63429	up			FALSE	Q5JX79_HUMAN (Q5JX79) OTTHUMP00000030115 (Fragment), partial (27%) [THC2659533]			30831898	chr16	30831839	-	hs|16p11.2		chr16:030831898-030831839
A_32_P396186	6.62586	2.72811	6.62586	up	tripartite motif containing 66	TRIM66	FALSE	Homo sapiens tripartite motif containing 66 (TRIM66), mRNA [NM_014818]	9866	GO:0016235|GO:0005730|GO:0008270|GO:0005634	8633658	chr11	8633599	-	hs|11p15.4	NM_014818	chr11:8633658-8633599	NM_014818	Hs.130836
A_23_P29057	6.62454	2.72782	6.62454	up	potassium inwardly-rectifying channel, subfamily J, member 6	KCNJ6	FALSE	Homo sapiens potassium inwardly-rectifying channel, subfamily J, member 6 (KCNJ6), mRNA [NM_002240]	3763	GO:0005515|GO:0005242|GO:0005794|GO:0005886|GO:0015467|GO:0008076|GO:0007268|GO:0034765|GO:0006813|GO:0071805	38997154	chr21	38997095	-	hs|21q22.13	NM_002240	chr21:38997154-38997095	NM_002240	Hs.658533
A_24_P67142	6.62373	2.72764	6.62373	up	SON DNA binding protein	SON	FALSE	Homo sapiens SON DNA binding protein (SON), transcript variant b, mRNA [NM_032195]	6651	GO:0005515|GO:0006397|GO:0008380|GO:0043066|GO:0003723|GO:0005730|GO:0000226|GO:0005634|GO:0050733|GO:0003676|GO:0003677|GO:0000910|GO:0016607|GO:0051726|GO:0043484	34931601	chr21	34931542	+	hs|21q22.11	NM_032195	chr21:34931542-34931601	NM_032195	Hs.517262
A_33_P3292602	6.57282	2.71651	6.57282	up			FALSE				14069245	chr9	14069186	+	hs|9p23		chr9:014069186-014069245
A_23_P359897	6.57182	2.71629	6.57182	up	lysine (K)-specific demethylase 7A	KDM7A	FALSE	Homo sapiens lysine (K)-specific demethylase 7A (KDM7A), mRNA [NM_030647]	80853	GO:0032454|GO:0035574|GO:0035575|GO:0005506|GO:0005730|GO:0005634|GO:0035064|GO:0051864|GO:0006351|GO:0070544|GO:0071557|GO:0016706|GO:0008270|GO:0030901|GO:0045893|GO:0071558|GO:0055114|GO:0033169	139785105	chr7	139785046	-	hs|7q34	NM_030647	chr7:139785105-139785046	NM_030647	Hs.308710
A_24_P413126	6.55786	2.71322	6.55786	up	prostate transmembrane protein, androgen induced 1	PMEPA1	FALSE	Homo sapiens prostate transmembrane protein, androgen induced 1 (PMEPA1), transcript variant 1, mRNA [NM_020182]	56937	GO:0005886|GO:0050699|GO:0031901|GO:0007179|GO:0016021|GO:0030521|GO:0030512	56223548	chr20	56223489	-	hs|20q13.31	NM_020182	chr20:56223548-56223489	NM_020182	Hs.517155
A_24_P408801	6.55587	2.71279	6.55587	up	zinc finger protein 587B	ZNF587B	FALSE	Human zinc finger protein zfp6 (ZF6) mRNA, partial cds. [U71363]	100293516	GO:0006355|GO:0005634|GO:0003676|GO:0046872	58353483	chr19	58353424	+	hs|19q13.43	U71363	chr19:58353424-58353483		Hs.658251
A_32_P514790	6.54657	2.71074	6.54657	up	unkempt family zinc finger	UNK	FALSE	Homo sapiens unkempt family zinc finger (UNK), transcript variant 1, mRNA [NM_001080419]	85451	GO:0008270	73821833	chr17	73821774	+	hs|17q25.1	NM_001080419	chr17:73821774-73821833	NM_001080419	Hs.584768
A_24_P272515	6.53941	2.70916	6.53941	up			FALSE				152042798	chr2	152042739	+	hs|2q23.3		chr2:152042739-152042798
A_24_P383598	6.52316	2.70557	6.52316	up			FALSE				121263598	chr4	121263539	+	hs|4q27		chr4:121263539-121263598
A_19_P00327206	6.47857	2.69568	6.47857	up			FALSE				178216460	chr2	178216401	+	hs|2q31.2		chr2:178216401-178216460
A_33_P3223648	6.47798	2.69554	6.47798	up	CEBPZ opposite strand	CEBPZOS	FALSE	Homo sapiens CEBPZ opposite strand (CEBPZOS), transcript variant 1, long non-coding RNA [NR_037879]	100505876		37430521	chr2	37430462	+	hs|2p22.2	NR_037879	chr2:37430462-37430521	NR_037879	Hs.743972
A_23_P306890	6.47696	2.69532	6.47696	up	polymerase (DNA directed) iota	POLI	FALSE	Homo sapiens polymerase (DNA directed) iota (POLI), mRNA [NM_007195]	11201	GO:0005622|GO:0005515|GO:0003684|GO:0006261|GO:0006281|GO:0003887|GO:0005654|GO:0005634|GO:0046872|GO:0043231	51820992	chr18	51820933	+	hs|18q21.2	NM_007195	chr18:51820933-51820992	NM_007195	Hs.438533
A_32_P148824	6.46456	2.69255	6.46456	up	chromosome 1 open reading frame 27	C1orf27	FALSE	Homo sapiens chromosome 1 open reading frame 27 (C1orf27), transcript variant 1, mRNA [NM_017847]	54953	GO:0016491|GO:0008270|GO:0016021|GO:0055114	186390335	chr1	186390276	+	hs|1q31.1	NM_017847	chr1:186390276-186390335	NM_017847	Hs.371210
A_33_P3369258	6.46418	2.69247	6.46418	up	FGFR1 oncogene partner 2	FGFR1OP2	FALSE	Homo sapiens FGFR1 oncogene partner 2 (FGFR1OP2), transcript variant 3, mRNA [NM_001171888]	26127	GO:0042060|GO:0042803|GO:0005829	27110675	chr12	27110616	+	hs|12p11.23	NM_001171888	chr12:27110616-27110675	NM_001171888	Hs.591162
A_23_P385427	6.45135	2.6896	6.45135	up			FALSE	GB			19946153	chr19	19946094	+	hs|19p13.11		chr19:019946094-019946153
A_33_P3327041	6.44581	2.68836	6.44581	up	PLCE1 antisense RNA 1	PLCE1-AS1	FALSE	Homo sapiens PLCE1 antisense RNA 1 (PLCE1-AS1), long non-coding RNA [NR_033969]	100128054		96039115	chr10	96039056	-	hs|10q23.33	NR_033969	chr10:96039115-96039056	NR_033969	Hs.677562
A_33_P3332175	6.44453	2.68807	6.44453	up			FALSE				51666839	chrX	51666780	+	hs|Xp11.22		chrX:051666780-051666839
A_24_P119259	6.4419	2.68749	6.4419	up	basic leucine zipper nuclear factor 1	BLZF1	FALSE	Homo sapiens basic leucine zipper nuclear factor 1 (BLZF1), mRNA [NM_003666]	8548	GO:0003700|GO:0006357|GO:0043001|GO:0005796|GO:0008283|GO:0005730|GO:0005634|GO:0001558|GO:0003677|GO:0005737|GO:0000139|GO:0007030|GO:0000278|GO:0019899|GO:0031625	169346178	chr1	169346119	+	hs|1q24.2	NM_003666	chr1:169346119-169346178	NM_003666	Hs.130746
A_33_P3332112	6.42444	2.68357	6.42444	up	Fas cell surface death receptor	FAS	FALSE	Homo sapiens Fas cell surface death receptor (FAS), transcript variant 1, mRNA [NM_000043]	355	GO:0005515|GO:0019724|GO:0031265|GO:0031264|GO:0097049|GO:0048536|GO:0042802|GO:0045619|GO:0051260|GO:0070062|GO:0032464|GO:0071285|GO:0009986|GO:0009636|GO:0051384|GO:0045121|GO:0009897|GO:0002377|GO:0004888|GO:0008625|GO:2001239|GO:0005886|GO:0006927|GO:0006925|GO:0005634|GO:0006924|GO:0005829|GO:0005737|GO:0004872|GO:0045637|GO:0004871|GO:2001241|GO:0019900|GO:0043066|GO:0043065|GO:0006919|GO:…	90774207	chr10	90774148	+	hs|10q23.31	NM_000043	chr10:90774148-90774207	NM_000043	Hs.244139
A_24_P90878	6.4239	2.68345	6.4239	up	THUMP domain containing 1	THUMPD1	FALSE	Homo sapiens THUMP domain containing 1 (THUMPD1), mRNA [NM_017736]	55623		20745705	chr16	20745646	-	hs|16p12.3	NM_017736	chr16:20745705-20745646	NM_017736	Hs.700004
A_24_P355967	6.4206	2.68271	6.4206	up	5-hydroxytryptamine (serotonin) receptor 2A, G protein-coupled	HTR2A	FALSE	Homo sapiens 5-hydroxytryptamine (serotonin) receptor 2A, G protein-coupled (HTR2A), transcript variant 1, mRNA [NM_000621]	3356	GO:0008219|GO:0030424|GO:0008284|GO:0001659|GO:0005886|GO:0043267|GO:0048148|GO:0007268|GO:0051378|GO:0007202|GO:0032403|GO:0014059|GO:0005829|GO:0070852|GO:0001965|GO:0004993|GO:0045907|GO:0043406|GO:0043198|GO:0071886|GO:0008144|GO:0043025|GO:0050966|GO:0007613|GO:0014832|GO:0070374|GO:0050965|GO:0014824|GO:0051209|GO:0010513|GO:0051967|GO:0042493|GO:0007568|GO:0046883|GO:0006874|GO:0030431|GO:…	47407996	chr13	47407937	-	hs|13q14.2	NM_000621	chr13:47407996-47407937	NM_000621	Hs.72630
A_23_P8452	6.40472	2.67913	6.40472	up	LFNG O-fucosylpeptide 3-beta-N-acetylglucosaminyltransferase	LFNG	FALSE	Homo sapiens LFNG O-fucosylpeptide 3-beta-N-acetylglucosaminyltransferase (LFNG), transcript variant 1, mRNA [NM_001040167]	3955	GO:0045747|GO:0033829|GO:0007386|GO:0001756|GO:0005576|GO:0014807|GO:0046872|GO:0032092|GO:0003674|GO:0001541|GO:0030173|GO:0007219|GO:0008152|GO:0009887|GO:0007143|GO:0008593	2568030	chr7	2567971	+	hs|7p22.3	NM_001040167	chr7:2567971-2568030	NM_001040167	Hs.159142
A_33_P3683362	6.39671	2.67733	6.39671	up	uncharacterized LOC284242	LOC284242	FALSE	Homo sapiens, clone IMAGE:5745916, mRNA. [BC035844]	284242		29524018	chr18	29523959	+	hs|18q12.1	BC035844	chr18:29523959-29524018		Hs.714049
A_33_P3363188	6.39402	2.67672	6.39402	up	asparagine synthetase pseudogene	FLJ43315	FALSE	Homo sapiens asparagine synthetase pseudogene (FLJ43315), non-coding RNA [NR_033856]	644316		91887	chrUn_gl000211	91828	+			chrUn_gl000211:91828-91887	NR_033856	Hs.632789
A_33_P3344482	6.38954	2.67571	6.38954	up	fermitin family member 2	FERMT2	FALSE	Homo sapiens fermitin family member 2 (FERMT2), transcript variant 3, mRNA [NM_001135000]	10979	GO:0005515|GO:0001725|GO:0031258|GO:0009986|GO:0034329|GO:0008360|GO:0005547|GO:0005730|GO:0005634|GO:0072657|GO:0033622|GO:0031234|GO:0005829|GO:0005737|GO:0031941|GO:0007160|GO:0007229|GO:0048041|GO:0034446|GO:0007179|GO:0016055|GO:0005925|GO:0005938|GO:0031674	53326331	chr14	53326272	-	hs|14q22.1	NM_001135000	chr14:53326331-53326272	NM_001135000	Hs.509343
A_19_P00326765	6.38948	2.6757	6.38948	up			FALSE				141851818	chr5	141851759	-	hs|5q31.3		chr5:141851818-141851759
A_33_P3285097	6.38187	2.67398	6.38187	up			FALSE				45414686	chr9	45414627	-	hs|9p11.2		chr9:045414686-045414627
A_19_P00330256	6.33076	2.66238	6.33076	up			FALSE				244483028	chr1	244482969	-	hs|1q44		chr1:244483028-244482969
A_23_P369471	6.32536	2.66115	6.32536	up	late cornified envelope 3A	LCE3A	FALSE	Homo sapiens late cornified envelope 3A (LCE3A), mRNA [NM_178431]	353142	GO:0031424	152595374	chr1	152595315	-	hs|1q21.3	NM_178431	chr1:152595374-152595315	NM_178431	Hs.553714
A_24_P363679	6.31978	2.65988	6.31978	up	ATPase, H+ transporting, lysosomal 50/57kDa, V1 subunit H	ATP6V1H	FALSE	Homo sapiens ATPase, H+ transporting, lysosomal 50/57kDa, V1 subunit H (ATP6V1H), transcript variant 1, mRNA [NM_015941]	51606	GO:0005515|GO:0008286|GO:0051701|GO:0005886|GO:0006200|GO:0005765|GO:0055085|GO:0050690|GO:0005829|GO:0006897|GO:0006879|GO:0033572|GO:0000221|GO:0050790|GO:0046961|GO:0007035|GO:0015991|GO:0016032|GO:0030234|GO:0090382|GO:0016887|GO:0070062	54684629	chr8	54684570	-	hs|8q11.23	NM_015941	chr8:54684629-54684570	NM_015941	Hs.491737
A_24_P122682	6.31484	2.65875	6.31484	up	RAB4A, member RAS oncogene family	RAB4A	FALSE	Homo sapiens RAB4A, member RAS oncogene family (RAB4A), transcript variant 1, mRNA [NM_004578]	5867	GO:0005515|GO:0048471|GO:0007264|GO:0003924|GO:0005525|GO:0015031|GO:0031982|GO:0006184|GO:0016020|GO:0019882|GO:0030100|GO:0008565|GO:0061024|GO:0019003|GO:0070062|GO:0005768	229438614	chr1	229434766	+	hs|1q42.13	NM_004578	chr1:229434766-229438614	NM_004578	Hs.296169
A_33_P3273684	6.29662	2.65458	6.29662	up	neurexin 1	NRXN1	FALSE	Homo sapiens neurexin 1 (NRXN1), transcript variant alpha2, mRNA [NM_001135659]	9378	GO:0005515|GO:0090129|GO:0030054|GO:2000311|GO:2000310|GO:0051490|GO:0016339|GO:0030198|GO:0007411|GO:0050885|GO:0030534|GO:0007612|GO:0050839|GO:0097091|GO:0051965|GO:2000821|GO:2000463|GO:0009986|GO:0060134|GO:0005509|GO:0051968|GO:0007416|GO:0071625|GO:0042734|GO:0005887|GO:0035176|GO:0042297|GO:0048306|GO:0023041|GO:0005886|GO:0097120|GO:0007268|GO:0035418|GO:0030139|GO:0007269|GO:0046872|GO:…	50149144	chr2	50149085	-	hs|2p16.3	NM_001135659	chr2:50149144-50149085	NM_001135659	Hs.637685
A_32_P116840	6.27153	2.64882	6.27153	up	CTAGE family, member 5	CTAGE5	FALSE	Homo sapiens CTAGE family, member 5 (CTAGE5), transcript variant 4, mRNA [NM_203356]	4253	GO:0043085|GO:0008047	39819509	chr14	39819450	+	hs|14q21.1	NM_203356	chr14:39819450-39819509	NM_203356	Hs.540038
A_23_P146551	6.26432	2.64716	6.26432	up	MOB kinase activator 3B	MOB3B	FALSE	Homo sapiens MOB kinase activator 3B (MOB3B), mRNA [NM_024761]	79817	GO:0005515|GO:0046872	27329679	chr9	27329620	-	hs|9p21.2	NM_024761	chr9:27329679-27329620	NM_024761	Hs.369022
A_23_P429998	6.24548	2.64281	6.24548	up	FBJ murine osteosarcoma viral oncogene homolog B	FOSB	FALSE	Homo sapiens FBJ murine osteosarcoma viral oncogene homolog B (FOSB), transcript variant 1, mRNA [NM_006732]	2354	GO:0051412|GO:0007565|GO:0003700|GO:0006366|GO:0042493|GO:0005634|GO:0043278|GO:0000122|GO:0051591|GO:0003677|GO:0032870|GO:0009612|GO:0043565|GO:0003690|GO:0071277|GO:0032570|GO:0008134	45978264	chr19	45978205	+	hs|19q13.32	NM_006732	chr19:45978205-45978264	NM_006732	Hs.590958
A_23_P48495	6.23122	2.63951	6.23122	up	T-cell leukemia/lymphoma 1B	TCL1B	FALSE	Homo sapiens T-cell leukemia/lymphoma 1B (TCL1B), mRNA [NM_004918]	9623		96158926	chr14	96158867	+	hs|14q32.13	NM_004918	chr14:96158867-96158926	NM_004918	Hs.632346
A_33_P3420011	6.22738	2.63863	6.22738	up			FALSE				72038313	chr16	72038254	-	hs|16q22.2		chr16:072038313-072038254
A_33_P3360758	6.22319	2.63765	6.22319	up			FALSE				62044411	chr20	62044352	-	hs|20q13.33		chr20:062044411-062044352
A_24_P261417	6.21198	2.63505	6.21198	up	dickkopf WNT signaling pathway inhibitor 3	DKK3	FALSE	Homo sapiens dickkopf WNT signaling pathway inhibitor 3 (DKK3), transcript variant 1, mRNA [NM_015881]	27122	GO:0030325|GO:2000065|GO:0016055|GO:0090090|GO:0045892|GO:0009653|GO:0005615|GO:0032348	11984974	chr11	11984915	-	hs|11p15.3	NM_015881	chr11:11984974-11984915	NM_015881	Hs.292156
A_24_P358868	6.20954	2.63449	6.20954	up	zinc finger protein 728	ZNF728	FALSE	Homo sapiens zinc finger protein 728 (ZNF728), mRNA [NM_001267716]	388523	GO:0005622|GO:0006355|GO:0003676|GO:0046872	23158862	chr19	23158803	-	hs|19p12	NM_001267716	chr19:23158862-23158803	NM_001267716	Hs.616766
A_19_P00803417	6.19992	2.63225	6.19992	up			FALSE				139935838	chr6	139935779	-	hs|6q24.1		chr6:139935838-139935779
A_33_P3359518	6.19912	2.63206	6.19912	up	Myb-like, SWIRM and MPN domains 1	MYSM1	FALSE	Homo sapiens Myb-like, SWIRM and MPN domains 1 (MYSM1), mRNA [NM_001085487]	114803	GO:0004843|GO:0003713|GO:0005634|GO:0003677|GO:0032403|GO:0046872|GO:0006351|GO:0042393|GO:0035522|GO:0045944|GO:0003682|GO:0006508|GO:0006338|GO:0004221|GO:0008237	59125723	chr1	59125664	-	hs|1p32.1	NM_001085487	chr1:59125723-59125664	NM_001085487	Hs.744921
A_23_P82128	6.19055	2.63007	6.19055	up	ribosomal protein S12	RPS12	FALSE	Homo sapiens ribosomal protein S12 (RPS12), mRNA [NM_001016]	6206	GO:0010467|GO:0003735|GO:0016070|GO:0016071|GO:0019083|GO:0006614|GO:0019058|GO:0006415|GO:0006412|GO:0006413|GO:0005829|GO:0006414|GO:0000184|GO:0022627|GO:0016032|GO:0044267	133138698	chr6	133138639	+	hs|6q23.2	NM_001016	chr6:133138639-133138698	NM_001016	Hs.546289
A_23_P107483	6.18535	2.62886	6.18535	up	olfactory receptor, family 3, subfamily A, member 3	OR3A3	FALSE	Homo sapiens olfactory receptor, family 3, subfamily A, member 3 (OR3A3), mRNA [NM_012373]	8392	GO:0050911|GO:0007165|GO:0004984|GO:0007186|GO:0005886|GO:0004930|GO:0016021	3324568	chr17	3324509	+	hs|17p13.2	NM_012373	chr17:3324509-3324568	NM_012373	Hs.532689
A_33_P3392350	6.18468	2.6287	6.18468	up			FALSE				93800231	chr11	93800172	-	hs|11q21		chr11:093800231-093800172
A_24_P40229	6.18167	2.628	6.18167	up	crooked neck pre-mRNA splicing factor 1	CRNKL1	FALSE	Homo sapiens crooked neck pre-mRNA splicing factor 1 (CRNKL1), transcript variant 1, mRNA [NM_016652]	51340	GO:0005515|GO:0000245|GO:0005737|GO:0016607|GO:0000398|GO:0003723|GO:0005681|GO:0071013	20018171	chr20	20018112	-	hs|20p11.23	NM_016652	chr20:20018171-20018112	NM_016652	Hs.171342
A_33_P3404744	6.18072	2.62778	6.18072	up	KIAA1958	KIAA1958	FALSE	Homo sapiens KIAA1958 (KIAA1958), transcript variant 1, mRNA [NM_001287036]	158405		115422703	chr9	115422644	+	hs|9q32	NM_001287036	chr9:115422644-115422703	NM_001287036	Hs.656619
A_24_P49190	6.16879	2.62499	6.16879	up	chromosome 17 open reading frame 58	C17orf58	FALSE	Homo sapiens chromosome 17 open reading frame 58 (C17orf58), transcript variant 1, mRNA [NM_181655]	284018		65987591	chr17	65987532	-	hs|17q24.2	NM_181655	chr17:65987591-65987532	NM_181655	Hs.90790
A_33_P3417459	6.16332	2.62371	6.16332	up	small Cajal body-specific RNA 9-like	SCARNA9L	FALSE	Homo sapiens small Cajal body-specific RNA 9-like (SCARNA9L), guide RNA [NR_023358]	100158262		20154363	chrX	20154304	-	hs|Xp22.12	NR_023358	chrX:20154363-20154304	NR_023358
A_33_P3271490	6.15401	2.62153	6.15401	up	RNA binding motif, single stranded interacting protein 1	RBMS1	FALSE	Homo sapiens RNA binding motif, single stranded interacting protein 1 (RBMS1), transcript variant 1, mRNA [NM_016836]	5937	GO:0006260|GO:0005515|GO:0006396|GO:0003690|GO:0003697|GO:0000166|GO:0003723|GO:0005634	161130579	chr2	161130520	-	hs|2q24.2	NM_016836	chr2:161130579-161130520	NM_016836	Hs.470412
A_33_P3223495	6.14935	2.62043	6.14935	up	furry homolog (Drosophila)	FRY	FALSE	furry homolog (Drosophila) [Source:HGNC Symbol;Acc:20367] [ENST00000602645]	10129	GO:0005737|GO:0000922|GO:0005815	32852932	chr13	32852873	+	hs|13q13.1	BX537670	chr13:32852873-32852932
A_33_P3391803	6.14508	2.61943	6.14508	up			FALSE				38459399	chr2	38459340	+	hs|2p22.2		chr2:038459340-038459399
A_33_P3421626	6.13537	2.61715	6.13537	up	KIAA1147	KIAA1147	FALSE	Homo sapiens KIAA1147 (KIAA1147), mRNA [NM_001080392]	57189		141356707	chr7	141356648	-	hs|7q34	NM_001080392	chr7:141356707-141356648	NM_001080392	Hs.521240
A_33_P3346348	6.12198	2.614	6.12198	up	TBC1 domain family, member 31	TBC1D31	FALSE	Homo sapiens TBC1 domain family, member 31 (TBC1D31), transcript variant 2, mRNA [NM_001145088]	93594	GO:0005813|GO:0032851|GO:0005097	124113227	chr8	124113168	+	hs|8q24.13	NM_001145088	chr8:124113168-124113227	NM_001145088	Hs.492716
A_23_P344555	6.08777	2.60591	6.08777	up	neural precursor cell expressed, developmentally down-regulated 9	NEDD9	FALSE	Homo sapiens neural precursor cell expressed, developmentally down-regulated 9 (NEDD9), transcript variant 1, mRNA [NM_006403]	4739	GO:0005515|GO:0005794|GO:0005819|GO:0005634|GO:0030027|GO:0007165|GO:0000922|GO:0005737|GO:0007067|GO:0007229|GO:0007010|GO:0007155|GO:0051017|GO:0005925|GO:0005938|GO:0040008	11184702	chr6	11184643	-	hs|6p24.2	NM_006403	chr6:11184702-11184643	NM_006403	Hs.37982
A_33_P3278813	6.08625	2.60555	6.08625	up			FALSE	Homo sapiens liver-related low express protein 1 (LRLE1) mRNA, complete cds. [AY461701]			12334261	chr8	12334202	+	hs|8p23.1	AY461701	chr8:12334202-12334261		Hs.675311
A_24_P136161	6.07514	2.60292	6.07514	up	heterogeneous nuclear ribonucleoprotein C-like 1	HNRNPCL1	FALSE	Homo sapiens heterogeneous nuclear ribonucleoprotein C-like 1 (HNRNPCL1), mRNA [NM_001013631]	343069	GO:0000166|GO:0030529|GO:0005634	12908069	chr1	12908010	-	hs|1p36.21	NM_001013631	chr1:12908069-12908010	NM_001013631	Hs.502617
A_24_P476086	6.06831	2.60129	6.06831	up	karyopherin alpha 5 (importin alpha 6)	KPNA5	FALSE	karyopherin alpha 5 (importin alpha 6) [Source:HGNC Symbol;Acc:6398] [ENST00000368564]	3841	GO:0005515|GO:0005737|GO:0019221|GO:0008565|GO:0005654|GO:0006607|GO:0005829	117056691	chr6	117056632	+	hs|6q22.1	XM_006715474	chr6:117056632-117056691	XM_006715474
A_24_P1773	6.06128	2.59962	6.06128	up	lon peptidase 2, peroxisomal	LONP2	FALSE	Homo sapiens lon peptidase 2, peroxisomal (LONP2), mRNA [NM_031490]	83752	GO:0005515|GO:0014070|GO:0031998|GO:0004252|GO:0005782|GO:0006200|GO:0006625|GO:0005102|GO:0005634|GO:0002020|GO:0005524|GO:0016485|GO:0004176|GO:0007031|GO:0008233|GO:0006515|GO:0019899|GO:0016558|GO:0005777	48387048	chr16	48386989	+	hs|16q12.1	NM_031490	chr16:48386989-48387048	NM_031490	Hs.731827
A_23_P16252	6.03609	2.59361	6.03609	up	kallikrein 1	KLK1	FALSE	Homo sapiens kallikrein 1 (KLK1), mRNA [NM_002257]	3816	GO:0004252|GO:0006508|GO:0005634|GO:0070062	51322506	chr19	51322447	-	hs|19q13.33	NM_002257	chr19:51322506-51322447	NM_002257	Hs.123107
A_33_P3239102	6.02665	2.59136	6.02665	up			FALSE				82927851	chr15	82927792	-	hs|15q25.2		chr15:082927851-082927792
A_33_P3388882	6.02508	2.59098	6.02508	up	family with sequence similarity 66, member D	FAM66D	FALSE	Homo sapiens family with sequence similarity 66, member D (FAM66D), long non-coding RNA [NR_027425]	100132923		11973726	chr8	11973667	+	hs|8p23.1	NR_027425	chr8:11973667-11973726	NR_027425	Hs.546711
A_33_P3349840	5.99773	2.58442	5.99773	up			FALSE				24553529	chr2	24553470	+	hs|2p23.3		chr2:024553470-024553529
A_24_P67898	5.99692	2.58422	5.99692	up	meningioma expressed antigen 5 (hyaluronidase)	MGEA5	FALSE	Homo sapiens meningioma-expressed antigen 5s splice variant mRNA, complete cds. [AF307332]	10724	GO:0060124|GO:0070265|GO:0060051|GO:0051054|GO:0046060|GO:0016573|GO:0010524|GO:0007568|GO:0006044|GO:0005634|GO:0048545|GO:0045862|GO:0005737|GO:0010616|GO:0031343|GO:0051901|GO:0043243|GO:0046326|GO:0006612|GO:0006516|GO:0004415|GO:0032024|GO:0004402	103556891	chr10	103556832	-	hs|10q24.32	AF307332	chr10:103556891-103556832		Hs.500842
A_24_P47681	5.99604	2.58401	5.99604	up	cullin-associated and neddylation-dissociated 1	CAND1	FALSE	Homo sapiens cullin-associated and neddylation-dissociated 1 (CAND1), mRNA [NM_018448]	55832	GO:0005515|GO:0031461|GO:0016567|GO:0045899|GO:0005730|GO:0000151|GO:0005634|GO:0010265|GO:0043086|GO:0030154|GO:0043231|GO:0005737|GO:0017025|GO:0070062	67707556	chr12	67707497	+	hs|12q15	NM_018448	chr12:67707497-67707556	NM_018448	Hs.546407
A_23_P319423	5.98977	2.5825	5.98977	up	potassium channel, subfamily K, member 5	KCNK5	FALSE	Homo sapiens potassium channel, subfamily K, member 5 (KCNK5), mRNA [NM_003740]	8645	GO:0007588|GO:0005244|GO:0005887|GO:0005267|GO:0034765|GO:0006813|GO:0071805	39156880	chr6	39156821	-	hs|6p21.2	NM_003740	chr6:39156880-39156821	NM_003740	Hs.444448
A_23_P360769	5.9893	2.58239	5.9893	up	mannosidase, alpha, class 2A, member 1	MAN2A1	FALSE	Homo sapiens mannosidase, alpha, class 2A, member 1 (MAN2A1), mRNA [NM_002372]	4124	GO:0048286|GO:0004572|GO:0007585|GO:0060042|GO:0001701|GO:0016799|GO:0001889|GO:0000139|GO:0050769|GO:0006491|GO:0030246|GO:0008270|GO:0007005|GO:0007033|GO:0016021|GO:0044267|GO:0070062|GO:0043687|GO:0006013|GO:0018279	109202595	chr5	109200837	+	hs|5q21.3	NM_002372	chr5:109200837-109202595	NM_002372	Hs.432822
A_24_P752208	5.98062	2.58029	5.98062	up			FALSE				35590774	chr15	35590715	-	hs|15q14		chr15:035590774-035590715
A_33_P3233906	5.9752	2.57899	5.9752	up	receptor (G protein-coupled) activity modifying protein 1	RAMP1	FALSE	Homo sapiens receptor (G protein-coupled) activity modifying protein 1 (RAMP1), mRNA [NM_005855]	10267	GO:0004948|GO:0005515|GO:0005886|GO:0009986|GO:0030819|GO:0031716|GO:0001525|GO:0015031|GO:0015026|GO:0072659|GO:0005615|GO:0006886|GO:0043235|GO:0031623|GO:0008277|GO:0007186|GO:0005887|GO:0008565|GO:0004872|GO:0006816|GO:0060050	238820598	chr2	238820539	+	hs|2q37.3	NM_005855	chr2:238820539-238820598	NM_005855	Hs.471783
A_23_P55281	5.96239	2.57589	5.96239	up	homeobox B7	HOXB7	FALSE	Homo sapiens homeobox B7 (HOXB7), mRNA [NM_004502]	3217	GO:0005515|GO:0006355|GO:0003700|GO:0005730|GO:0005634|GO:0007275|GO:0048704|GO:0009952|GO:0006351|GO:0043565|GO:0005737|GO:0030099|GO:0090190	46685048	chr17	46684989	-	hs|17q21.32	NM_004502	chr17:46685048-46684989	NM_004502	Hs.436181
A_33_P3321275	5.95843	2.57493	5.95843	up	lysine (K)-specific methyltransferase 2C	KMT2C	FALSE	Homo sapiens lysine (K)-specific methyltransferase 2C (KMT2C), mRNA [NM_170606]	58508	GO:0035556|GO:0005515|GO:0035097|GO:0006355|GO:0008270|GO:0005634|GO:0042800|GO:0003677|GO:0051568|GO:0006351	151921158	chr7	151921100	-	hs|7q36.1	NM_170606	chr7:151921158-151921100	NM_170606	Hs.647120
A_23_P6596	5.93219	2.56857	5.93219	up	hes family bHLH transcription factor 1	HES1	FALSE	Homo sapiens hes family bHLH transcription factor 1 (HES1), mRNA [NM_005524]	3280	GO:0005515|GO:0003700|GO:0006366|GO:0061106|GO:0021555|GO:0021558|GO:0045598|GO:0021557|GO:0046331|GO:0048844|GO:0048538|GO:0003281|GO:0060675|GO:0021861|GO:0042803|GO:0007224|GO:0003143|GO:0061009|GO:0007219|GO:0060716|GO:0045747|GO:0000122|GO:0045977|GO:0001889|GO:0045608|GO:0043388|GO:0005654|GO:0045892|GO:0008134|GO:0021984|GO:0035910|GO:0008284|GO:0042668|GO:0042826|GO:0030324|GO:0007262|GO:…	193854463	chr3	193854276	+	hs|3q29	NM_005524	chr3:193854276-193854463	NM_005524	Hs.250666
A_33_P3878964	5.91678	2.56481	5.91678	up	N(alpha)-acetyltransferase 25, NatB auxiliary subunit	NAA25	FALSE	Homo sapiens N(alpha)-acetyltransferase 25, NatB auxiliary subunit (NAA25), mRNA [NM_024953]	80018	GO:0005737	112465702	chr12	112465643	-	hs|12q24.13	NM_024953	chr12:112465702-112465643	NM_024953	Hs.530941
A_23_P47148	5.90577	2.56212	5.90577	up	NADPH oxidase 4	NOX4	FALSE	Homo sapiens NADPH oxidase 4 (NOX4), transcript variant 1, mRNA [NM_016931]	50507	GO:0051897|GO:0048471|GO:0008285|GO:2000573|GO:0045453|GO:0050660|GO:0071560|GO:0071480|GO:0050667|GO:0014911|GO:0072341|GO:0005739|GO:0016324|GO:0006954|GO:0000166|GO:0016175|GO:0043406|GO:0016174|GO:0070374|GO:0071333|GO:0042554|GO:0001666|GO:0043065|GO:0007569|GO:0072593|GO:0005730|GO:0009055|GO:0035051|GO:0000902|GO:0051496|GO:0019826|GO:0005789|GO:0016021|GO:0043020|GO:0071320|GO:2000379|GO:…	89059885	chr11	89059826	-	hs|11q14.3	NM_016931	chr11:89059885-89059826	NM_016931	Hs.371036
A_33_P3376836	5.90365	2.56161	5.90365	up			FALSE				1069473	chr6	1069414	+	hs|6p25.3		chr6:001069414-001069473
A_19_P00800033	5.89755	2.56012	5.89755	up			FALSE				106208584	chr8	106208525	+	hs|8q23.1		chr8:106208525-106208584
A_24_P202497	5.88488	2.55701	5.88488	up	twisted gastrulation BMP signaling modulator 1	TWSG1	FALSE	Homo sapiens twisted gastrulation BMP signaling modulator 1 (TWSG1), mRNA [NM_020648]	57045	GO:0030097|GO:0001707|GO:0030509|GO:0005615|GO:0030154|GO:0030514|GO:0030513|GO:0045668|GO:0001503|GO:0043010|GO:0030900|GO:0007435|GO:0070062	9402258	chr18	9402199	+	hs|18p11.22	NM_020648	chr18:9402199-9402258	NM_020648	Hs.514685
A_33_P3281196	5.87377	2.55429	5.87377	up	mitochondrial ribosomal protein S36	MRPS36	FALSE	Homo sapiens mitochondrial ribosomal protein S36 (MRPS36), mRNA [NM_033281]	92259	GO:0005739|GO:0003735|GO:0006412|GO:0005763	68524191	chr5	68524132	+	hs|5q13.2	NM_033281	chr5:68524132-68524191	NM_033281	Hs.631971
A_24_P941441	5.86277	2.55158	5.86277	up	guanine nucleotide binding protein (G protein), alpha 13	GNA13	FALSE	Homo sapiens guanine nucleotide binding protein (G protein), alpha 13 (GNA13), transcript variant 1, mRNA [NM_006572]	10672	GO:0005515|GO:0005886|GO:0008360|GO:0003924|GO:0006928|GO:0005634|GO:0007266|GO:0031526|GO:0007204|GO:0031702|GO:0046872|GO:0030154|GO:0004871|GO:0070062|GO:0030334|GO:0031584|GO:0042470|GO:0001569|GO:0005834|GO:0030168|GO:0005525|GO:0031683|GO:0001701|GO:0031234|GO:0006184|GO:0007165|GO:0007596|GO:0031752|GO:0007189	63007307	chr17	63007248	-	hs|17q24.1	NM_006572	chr17:63007307-63007248	NM_006572	Hs.515018
A_24_P335092	5.85958	2.5508	5.85958	up	serum amyloid A1	SAA1	FALSE	Homo sapiens serum amyloid A1 (SAA1), transcript variant 1, mRNA [NM_000331]	6288	GO:0001664|GO:0030593|GO:0030168|GO:0050716|GO:0005576|GO:0050715|GO:0006953|GO:0007204|GO:0045785|GO:0034364|GO:0071682|GO:0050728|GO:0045087|GO:0050708|GO:0048247|GO:0048246|GO:0008201|GO:0070062	18291310	chr11	18290868	+	hs|11p15.1	NM_000331	chr11:18290868-18291310	NM_000331	Hs.632144
A_19_P00321754	5.85075	2.54862	5.85075	up			FALSE				22113664	chr6	22113605	+	hs|6p22.3		chr6:022113605-022113664
A_23_P257649	5.83908	2.54574	5.83908	up	retinol binding protein 1, cellular	RBP1	FALSE	Homo sapiens retinol binding protein 1, cellular (RBP1), transcript variant 1, mRNA [NM_002899]	5947	GO:0005215|GO:0007603|GO:0006776|GO:0016918|GO:0006810|GO:0005501|GO:0019841|GO:0001523|GO:0005829	139257729	chr3	139257670	-	hs|3q23	NM_002899	chr3:139257729-139257670	NM_002899	Hs.529571
A_32_P806841	5.83617	2.54502	5.83617	up	ADP-ribosylation factor-like 4A	ARL4A	FALSE	Homo sapiens ADP-ribosylation factor-like 4A (ARL4A), transcript variant 1, mRNA [NM_005738]	10124	GO:0005515|GO:0005737|GO:0005886|GO:0050873|GO:0007264|GO:0005730|GO:0005634|GO:0005525	12728514	chr7	12728454	+	hs|7p21.3	NM_005738	chr7:12728454-12728514	NM_005738	Hs.245540
A_32_P53558	5.82497	2.54225	5.82497	up			FALSE				98379651	chr3	98379592	+	hs|3q12.1		chr3:098379592-098379651
A_19_P00803441	5.82239	2.54161	5.82239	up	uncharacterized LOC100499194	LOC100499194	FALSE	Homo sapiens uncharacterized LOC100499194 (LOC100499194), long non-coding RNA [NR_034130]	100499194		114735350	chr2	114735291	-	hs|2q14.1	NR_034130	chr2:114735350-114735291	NR_034130	Hs.662336
A_33_P3263274	5.81318	2.53933	5.81318	up			FALSE				2887034	chr16	2886975	-	hs|16p13.3		chr16:002887034-002886975
A_24_P261567	5.81068	2.53871	5.81068	up	glycerophosphodiester phosphodiesterase domain containing 5	GDPD5	FALSE	Homo sapiens glycerophosphodiester phosphodiesterase domain containing 5 (GDPD5), mRNA [NM_030792]	81544	GO:0006629|GO:0045746|GO:0048505|GO:0048471|GO:0021522|GO:0006071|GO:0031175|GO:0012505|GO:0030426|GO:0045666|GO:0016021|GO:0008889|GO:0021895	75147988	chr11	75146649	-	hs|11q13.4	NM_030792	chr11:75147988-75146649	NM_030792	Hs.503297
A_33_P3280875	5.79148	2.53393	5.79148	up	influenza virus NS1A binding protein	IVNS1ABP	FALSE	Homo sapiens influenza virus NS1A binding protein (IVNS1ABP), mRNA [NM_006469]	10625	GO:0008380|GO:0005667|GO:0005737|GO:0016032|GO:0005681|GO:0005654|GO:2001243|GO:0009615|GO:0005856|GO:0006383	185277992	chr1	185277933	-	hs|1q25.3	NM_006469	chr1:185277992-185277933	NM_006469	Hs.497183
A_19_P00811288	5.76738	2.52792	5.76738	up	ubiquinol-cytochrome c reductase binding protein pseudogene 1	UQCRBP1	FALSE	Homo sapiens ubiquinol-cytochrome c reductase binding protein pseudogene 1 (UQCRBP1), non-coding RNA [NR_002308]	442454		56763863	chrX	56763804	-	hs|Xp11.21	NR_002308	chrX:56763863-56763804	NR_002308	Hs.663220
A_33_P3337627	5.7457	2.52248	5.7457	up	transient receptor potential cation channel, subfamily C, member 6	TRPC6	FALSE	Homo sapiens transient receptor potential cation channel, subfamily C, member 6 (TRPC6), mRNA [NM_004621]	7225	GO:0005515|GO:0070301|GO:0005886|GO:0051928|GO:0007568|GO:0071456|GO:0030168|GO:0032414|GO:0055085|GO:0007204|GO:0070679|GO:0034220|GO:0007411|GO:0007596|GO:0036057|GO:0070588|GO:0015279|GO:0016021|GO:0006812	101323047	chr11	101322988	-	hs|11q22.1	NM_004621	chr11:101323047-101322988	NM_004621	Hs.159003
A_24_P647682	5.74328	2.52187	5.74328	up			FALSE				55714309	chr7	55714250	+	hs|7p11.2		chr7:055714250-055714309
A_33_P3240229	5.72726	2.51784	5.72726	up	CREB binding protein	CREBBP	FALSE	Homo sapiens CREB binding protein (CREBBP), transcript variant 1, mRNA [NM_004380]	1387	GO:0005515|GO:0000987|GO:0001191|GO:0010467|GO:0000790|GO:0003700|GO:0006367|GO:0006325|GO:0018076|GO:0007219|GO:0000123|GO:0044255|GO:0001102|GO:0001105|GO:0003713|GO:0000122|GO:0045087|GO:0005654|GO:0008270|GO:0016407|GO:0048511|GO:0045893|GO:0042733|GO:0008134|GO:0061418|GO:0005634|GO:0044281|GO:0002039|GO:0005737|GO:0045944|GO:0001085|GO:0016032|GO:0032481|GO:0004871|GO:0030718|GO:0004402|GO:…	3775171	chr16	3775112	-	hs|16p13.3	NM_004380	chr16:3775171-3775112	NM_004380	Hs.459759
A_23_P62999	5.71607	2.51502	5.71607	up	exostosin-like glycosyltransferase 1	EXTL1	FALSE	Homo sapiens exostosin-like glycosyltransferase 1 (EXTL1), mRNA [NM_004455]	2134	GO:0050508|GO:0001501|GO:0031227|GO:0006486|GO:0016021	26362805	chr1	26362746	+	hs|1p36.11	NM_004455	chr1:26362746-26362805	NM_004455	Hs.150956
A_33_P3313145	5.696	2.50995	5.696	up	inter-alpha-trypsin inhibitor heavy chain 3	ITIH3	FALSE	Homo sapiens inter-alpha-trypsin inhibitor heavy chain 3 (ITIH3), mRNA [NM_002217]	3699	GO:0010951|GO:0004866|GO:0004867|GO:0030212|GO:0005576	52842697	chr3	52842638	+	hs|3p21.1	NM_002217	chr3:52842638-52842697	NM_002217	Hs.76716
A_23_P303101	5.68198	2.50639	5.68198	up	protocadherin gamma subfamily C, 4	PCDHGC4	FALSE	Homo sapiens protocadherin gamma subfamily C, 4 (PCDHGC4), transcript variant 2, mRNA [NM_032406]	56098	GO:0005886|GO:0005509|GO:0016021|GO:0007156	140867345	chr5	140867286	+	hs|5q31.3	NM_032406	chr5:140867286-140867345	NM_032406	Hs.368160
A_33_P3260634	5.66829	2.50291	5.66829	up	phospholipase C, beta 4	PLCB4	FALSE	Homo sapiens phospholipase C, beta 4 (PLCB4), transcript variant 3, mRNA [NM_001172646]	5332	GO:0043647|GO:0005509|GO:0014069|GO:0005634|GO:0044281|GO:0030425|GO:0005790|GO:0005829|GO:0016042|GO:0035556|GO:0004629|GO:0004435|GO:0004871	9461415	chr20	9461356	+	hs|20p12.2	NM_001172646	chr20:9461356-9461415	NM_001172646	Hs.472101
A_33_P3276913	5.66486	2.50204	5.66486	up			FALSE	601860685F2 NIH_MGC_76 Homo sapiens cDNA clone IMAGE:4072028 5', mRNA sequence [BG533310]			38471388	chr21	38471329	+	hs|21q22.13	BG533310	chr21:038471329-038471388		Hs.659005
A_24_P280706	5.6378	2.49513	5.6378	up	SGT1, suppressor of G2 allele of SKP1 (S. cerevisiae)	SUGT1	FALSE	Homo sapiens SGT1, suppressor of G2 allele of SKP1 (S. cerevisiae) (SUGT1), transcript variant 1A, mRNA [NM_006704]	10910	GO:0005515|GO:0007067|GO:0005737|GO:0045087|GO:0000776|GO:0000151|GO:0005634|GO:0035872|GO:0005829	53231737	chr13	53231679	+	hs|13q14.3	NM_006704	chr13:53231679-53231737	NM_006704	Hs.281902
A_33_P3358208	5.63746	2.49505	5.63746	up	peptidyl arginine deiminase, type I	PADI1	FALSE	Homo sapiens peptidyl arginine deiminase, type I (PADI1), mRNA [NM_013358]	29943	GO:0018101|GO:0005737|GO:0005509|GO:0004668|GO:0070062	17572501	chr1	17572442	+	hs|1p36.13	NM_013358	chr1:17572442-17572501	NM_013358	Hs.412941
A_23_P40096	5.61841	2.49016	5.61841	up	protein C (inactivator of coagulation factors Va and VIIIa)	PROC	FALSE	Homo sapiens protein C (inactivator of coagulation factors Va and VIIIa) (PROC), mRNA [NM_000312]	5624	GO:0005515|GO:0043066|GO:0004252|GO:0005886|GO:0005796|GO:0005509|GO:0005576|GO:0050900|GO:0017187|GO:0007596|GO:0030195|GO:0006508|GO:0005788|GO:0044267|GO:0043687	128186692	chr2	128186633	+	hs|2q14.3	NM_000312	chr2:128186633-128186692	NM_000312	Hs.224698
A_24_P841677	5.61613	2.48958	5.61613	up	chromosome X open reading frame 23	CXorf23	FALSE	Homo sapiens chromosome X open reading frame 23 (CXorf23), mRNA [NM_198279]	256643	GO:0005739	19983543	chrX	19983484	-	hs|Xp22.12	NM_198279	chrX:19983543-19983484	NM_198279	Hs.28896
A_33_P3316093	5.60218	2.48599	5.60218	up			FALSE				237203552	chr2	237203493	+	hs|2q37.2		chr2:237203493-237203552
A_23_P129577	5.59988	2.4854	5.59988	up	tigger transposable element derived 7	TIGD7	FALSE	Homo sapiens tigger transposable element derived 7 (TIGD7), mRNA [NM_033208]	91151	GO:0005634|GO:0003677	3349366	chr16	3349307	-	hs|16p13.3	NM_033208	chr16:3349366-3349307	NM_033208	Hs.745181
A_33_P3304252	5.59651	2.48453	5.59651	up	mitochondrial ribosomal protein L32	MRPL32	FALSE	Homo sapiens mitochondrial ribosomal protein L32 (MRPL32), mRNA [NM_031903]	64983	GO:0003735|GO:0005761|GO:0015934|GO:0006412	42977222	chr7	42977163	+	hs|7p14.1	NM_031903	chr7:42977163-42977222	NM_031903	Hs.50252
A_33_P3249529	5.58857	2.48248	5.58857	up	pecanex homolog (Drosophila)	PCNX	FALSE	Homo sapiens pecanex homolog (Drosophila) (PCNX), mRNA [NM_014982]	22990	GO:0016021	71581996	chr14	71581937	+	hs|14q24.2	NM_014982	chr14:71581937-71581996	NM_014982	Hs.446559
A_24_P202558	5.58734	2.48216	5.58734	up	signal-induced proliferation-associated 1 like 3	SIPA1L3	FALSE	Homo sapiens signal-induced proliferation-associated 1 like 3 (SIPA1L3), mRNA [NM_015073]	23094	GO:0043547|GO:0051056|GO:0005615|GO:0005096	38698828	chr19	38698769	+	hs|19q13.13	NM_015073	chr19:38698769-38698828	NM_015073	Hs.655502
A_33_P3235454	5.56135	2.47544	5.56135	up			FALSE	Q3SZ59_BOVIN (Q3SZ59) Ribosomal protein L36a, partial (96%) [THC2542270]			60682799	chr15	60682740	+	hs|15q22.2		chr15:060682740-060682799
A_33_P3289236	5.55391	2.4735	5.55391	up	haptoglobin-related protein	HPR	FALSE	Homo sapiens haptoglobin-related protein (HPR), mRNA [NM_020995]	3250	GO:0030492|GO:0008152|GO:0034366|GO:0072562|GO:0005576|GO:0003824	72110943	chr16	72110884	+	hs|16q22.2	NM_020995	chr16:72110884-72110943	NM_020995	Hs.655361
A_33_P3812669	5.55176	2.47295	5.55176	up	GABA(A) receptor-associated protein like 1	GABARAPL1	FALSE	Homo sapiens GABA(A) receptor-associated protein like 1 (GABARAPL1), mRNA [NM_031412]	23710	GO:0005515|GO:0008017|GO:0005776|GO:0005794|GO:0000422|GO:0005783|GO:0008429|GO:0000421|GO:0005874|GO:0048487|GO:0050811|GO:0012501|GO:0000407|GO:0032258|GO:0005829|GO:0005622|GO:0071211|GO:0034727|GO:0000045|GO:0030659	10375637	chr12	10375579	+	hs|12p13.2	NM_031412	chr12:10375579-10375637	NM_031412	Hs.524250
A_24_P114255	5.5431	2.47069	5.5431	up	membrane bound O-acyltransferase domain containing 2	MBOAT2	FALSE	Homo sapiens membrane bound O-acyltransferase domain containing 2 (MBOAT2), mRNA [NM_138799]	129642	GO:0005789|GO:0044281|GO:0016021|GO:0006644|GO:0003841|GO:0036151|GO:0046474|GO:0036152	8997233	chr2	8997174	-	hs|2p25.1	NM_138799	chr2:8997233-8997174	NM_138799	Hs.467634
A_19_P00315804	5.52234	2.46528	5.52234	up	VLDLR antisense RNA 1	VLDLR-AS1	FALSE	Homo sapiens VLDLR antisense RNA 1 (VLDLR-AS1), long non-coding RNA [NR_015375]	401491		2536421	chr9	2536362	-	hs|9p24.2	NR_015375	chr9:2536421-2536362	NR_015375	Hs.416043
A_33_P3331345	5.50494	2.46073	5.50494	up	dual specificity phosphatase 11 (RNA/RNP complex 1-interacting)	DUSP11	FALSE	Homo sapiens dual specificity phosphatase 11 (RNA/RNP complex 1-interacting) (DUSP11), mRNA [NM_003584]	8446	GO:0004651|GO:0016791|GO:0006396|GO:0016607|GO:0016070|GO:0003723|GO:0005634|GO:0008138|GO:0035335|GO:0004725	74002134	chr2	74002075	-	hs|2p13.1	NM_003584	chr2:74002134-74002075	NM_003584	Hs.14611
A_19_P00329564	5.49034	2.45689	5.49034	up	THAP9 antisense RNA 1	THAP9-AS1	FALSE	Homo sapiens THAP9 antisense RNA 1 (THAP9-AS1), transcript variant 1, long non-coding RNA [NR_034075]	100499177		83814661	chr4	83814605	-	hs|4q21.22	NR_034075	chr4:83814661-83814605	NR_034075	Hs.728916
A_32_P56525	5.48976	2.45674	5.48976	up	family with sequence similarity 115, member A	FAM115A	FALSE	Homo sapiens family with sequence similarity 115, member A (FAM115A), transcript variant 1, mRNA [NM_014719]	9747		143550522	chr7	143550463	-	hs|7q35	NM_014719	chr7:143550522-143550463	NM_014719	Hs.744048
A_24_P227069	5.4813	2.45452	5.4813	up	glycerol-3-phosphate acyltransferase, mitochondrial	GPAM	FALSE	Homo sapiens glycerol-3-phosphate acyltransferase, mitochondrial (GPAM), transcript variant 2, mRNA [NM_020918]	57678	GO:0006637|GO:0070970|GO:0005886|GO:0070236|GO:0005743|GO:0055089|GO:0004366|GO:0005741|GO:0044281|GO:0009749|GO:0042104|GO:0051607|GO:0006631|GO:0016024|GO:0019432|GO:0055091|GO:0050707|GO:0016021|GO:0040018|GO:0006644|GO:0006654|GO:0044255|GO:0046474	113909886	chr10	113909827	-	hs|10q25.2	NM_020918	chr10:113909886-113909827	NM_020918	Hs.42586
A_24_P32520	5.47289	2.4523	5.47289	up	ring finger protein 214	RNF214	FALSE	Homo sapiens ring finger protein 214 (RNF214), transcript variant 1, mRNA [NM_001077239]	257160	GO:0008270	117156070	chr11	117156011	+	hs|11q23.3	NM_001077239	chr11:117156011-117156070	NM_001077239	Hs.591934
A_19_P00804050	5.47089	2.45178	5.47089	up			FALSE				113883306	chr10	113883247	-	hs|10q25.2		chr10:113883306-113883247
A_24_P286054	5.46411	2.44999	5.46411	up	zinc finger, FYVE domain containing 16	ZFYVE16	FALSE	Homo sapiens zinc finger, FYVE domain containing 16 (ZFYVE16), transcript variant 2, mRNA [NM_001105251]	9765	GO:0005515|GO:0005547|GO:0030509|GO:0046872|GO:0043231|GO:0005545|GO:0007165|GO:0016050|GO:0005737|GO:0030100|GO:0031901|GO:0008565|GO:0016197|GO:0006622|GO:0005769	79774858	chr5	79774799	+	hs|5q14.1	NM_001105251	chr5:79774799-79774858	NM_001105251	Hs.482660
A_33_P3226788	5.4626	2.44959	5.4626	up			FALSE				6928851	chr7	6928792	-	hs|7p22.1		chr7:006928851-006928792
A_24_P221485	5.45255	2.44693	5.45255	up		XLOC_014512	FALSE	BROAD Institute lincRNA (XLOC_014512), lincRNA [TCONS_l2_00001295]			79520790	chr1	79520731	-	hs|1p31.1		chr1:79520790-79520731
A_24_P161813	5.45205	2.4468	5.45205	up	zinc finger protein 91 pseudogene	LOC441666	FALSE	Homo sapiens zinc finger protein 91 pseudogene (LOC441666), non-coding RNA [NR_024380]	441666		42832591	chr10	42832532	-	hs|10q11.21	NR_024380	chr10:42832591-42832532	NR_024380	Hs.255729
A_33_P3800664	5.44626	2.44527	5.44626	up			FALSE	Homo sapiens cDNA FLJ33330 fis, clone BRACE2000441. [AK090649]			1345871	chr1	1345812	+	hs|1p36.33	AK090649	chr1:1345812-1345871		Hs.606892
A_24_P583040	5.4378	2.44302	5.4378	up	chromosome 17 open reading frame 67	C17orf67	FALSE	Homo sapiens chromosome 17 open reading frame 67 (C17orf67), mRNA [NM_001085430]	339210	GO:0005576	54910335	chr17	54910276	-	hs|17q22	NM_001085430	chr17:54910335-54910276	NM_001085430	Hs.658949
A_33_P3260430	5.43214	2.44152	5.43214	up	small proline-rich protein 2A	SPRR2A	FALSE	Homo sapiens small proline-rich protein 2A (SPRR2A), mRNA [NM_005988]	6700	GO:0005515|GO:0005737|GO:0008544|GO:0030216|GO:0031424|GO:0001533	153028658	chr1	153028599	-	hs|1q21.3	NM_005988	chr1:153028658-153028599	NM_005988	Hs.355542
A_32_P98227	5.42463	2.43953	5.42463	up	LIM domain binding 3	LDB3	FALSE	Homo sapiens LIM domain binding 3 (LDB3), transcript variant 5, mRNA [NM_001171610]	11155	GO:0008092|GO:0005515|GO:0051371|GO:0048471|GO:0030018|GO:0005080|GO:0045214|GO:0008270|GO:0005856|GO:0031143	88495824	chr10	88495765	+	hs|10q23.2	NM_001171610	chr10:88495765-88495824	NM_001171610	Hs.657271
A_23_P83976	5.41859	2.43792	5.41859	up	centrosomal protein 112kDa	CEP112	FALSE	Homo sapiens centrosomal protein 112kDa (CEP112), transcript variant 1, mRNA [NM_145036]	201134	GO:0005813|GO:0005737|GO:0005886|GO:0097120|GO:0060077	63685309	chr17	63685250	-	hs|17q24.1	NM_145036	chr17:63685309-63685250	NM_145036	Hs.408676
A_33_P3316978	5.40388	2.43399	5.40388	up	ring finger protein 207	RNF207	FALSE	Homo sapiens ring finger protein 207 (RNF207), mRNA [NM_207396]	388591	GO:0005622|GO:0008270	6281302	chr1	6281243	+	hs|1p36.31	NM_207396	chr1:6281243-6281302	NM_207396	Hs.716549
A_24_P127312	5.39725	2.43222	5.39725	up			FALSE	Q80V08_MOUSE (Q80V08) Rpl17 protein (Fragment), partial (94%) [THC2554858]		GO:0003735|GO:0005840|GO:0006412	29490100	chr8	29490041	+	hs|8p12		chr8:029490041-029490100
A_19_P00811523	5.36629	2.42393	5.36629	up			FALSE				75152677	chr2	75152618	-	hs|2p12		chr2:075152677-075152618
A_24_P96780	5.36357	2.42319	5.36357	up	centromere protein F, 350/400kDa	CENPF	FALSE	Homo sapiens centromere protein F, 350/400kDa (CENPF), mRNA [NM_016343]	1063	GO:0005515|GO:0007094|GO:0048471|GO:0008283|GO:0005634|GO:0005635|GO:0015031|GO:0042803|GO:0030154|GO:0016363|GO:0005829|GO:0000085|GO:0005737|GO:0051382|GO:0007059|GO:0000086|GO:0000087|GO:0051726|GO:0016202|GO:0000785|GO:0051310|GO:0042493|GO:0010389|GO:0005730|GO:0005819|GO:0030496|GO:0008022|GO:0006260|GO:0000940|GO:0000922|GO:0007067|GO:0045502|GO:0007517|GO:0003682|GO:0000776|GO:0045120|GO:…	214826298	chr1	214826239	+	hs|1q41	NM_016343	chr1:214826239-214826298	NM_016343	Hs.497741
A_33_P3248519	5.3493	2.41935	5.3493	up	structural maintenance of chromosomes 4	SMC4	FALSE	Homo sapiens structural maintenance of chromosomes 4 (SMC4), transcript variant 1, mRNA [NM_005496]	10051	GO:0000796|GO:0005515|GO:0007076|GO:0010032|GO:0046982|GO:0005730|GO:0005634|GO:0051383|GO:0005524|GO:0005829|GO:0000070|GO:0005737|GO:0045132|GO:0005654|GO:0000278	160132265	chr3	160132206	+	hs|3q25.33	NM_005496	chr3:160132206-160132265	NM_005496	Hs.58992
A_33_P3326892	5.34278	2.41759	5.34278	up	uncharacterized LOC100133032	LOC100133032	FALSE	Homo sapiens cDNA FLJ26718 fis, clone PNC03325. [AK130228]	100133032		47645495	chr3	47645436	-	hs|3p21.31	AK130228	chr3:47645495-47645436
A_19_P00801188	5.34243	2.4175	5.34243	up			FALSE				53607684	chr18	53607625	+	hs|18q21.2		chr18:053607625-053607684
A_33_P3328937	5.33168	2.41459	5.33168	up	tousled-like kinase 2	TLK2	FALSE	Homo sapiens tousled-like kinase 2 (TLK2), transcript variant B, mRNA [NM_001284363]	11011	GO:0005515|GO:0005882|GO:0048471|GO:0005730|GO:0005634|GO:0071480|GO:0032435|GO:0005524|GO:0006974|GO:0035556|GO:0007049|GO:0007059|GO:0018105|GO:0004674|GO:0010507|GO:0006468|GO:0001672|GO:0016568	60599627	chr17	60599568	+	hs|17q23.2	NM_001284363	chr17:60599568-60599627	NM_001284363	Hs.445078
A_33_P3371889	5.33044	2.41426	5.33044	up	NUAK family, SNF1-like kinase, 1	NUAK1	FALSE	Homo sapiens NUAK family, SNF1-like kinase, 1 (NUAK1), mRNA [NM_014840]	9891	GO:0005515|GO:0035507|GO:0005730|GO:0005634|GO:0005524|GO:0030155|GO:0046872|GO:0006974|GO:0002039|GO:0005737|GO:0004674|GO:0042127|GO:0015630|GO:0006468|GO:2000772|GO:0007155	106461136	chr12	106461077	-	hs|12q23.3	NM_014840	chr12:106461136-106461077	NM_014840	Hs.524692
A_23_P120472	5.32816	2.41364	5.32816	up	transcription factor AP-2 gamma (activating enhancer binding protein 2 gamma)	TFAP2C	FALSE	Homo sapiens transcription factor AP-2 gamma (activating enhancer binding protein 2 gamma) (TFAP2C), mRNA [NM_003222]	7022	GO:0005515|GO:0003700|GO:0021987|GO:0006366|GO:0060750|GO:0007267|GO:0045682|GO:0005634|GO:0003334|GO:0060598|GO:0045944|GO:0046983|GO:0001942|GO:0030718|GO:0035019|GO:0006357|GO:0021877|GO:0000122|GO:0001829|GO:0003677|GO:0001078|GO:0001077|GO:0048733|GO:0000980|GO:0008584	55213705	chr20	55213646	+	hs|20q13.31	NM_003222	chr20:55213646-55213705	NM_003222	Hs.473152
A_23_P339687	5.32427	2.41258	5.32427	up	zinc finger protein 675	ZNF675	FALSE	Homo sapiens zinc finger protein 675 (ZNF675), mRNA [NM_138330]	171392	GO:0005515|GO:0048471|GO:2000660|GO:0045453|GO:0019221|GO:0007249|GO:0045671|GO:0005634|GO:0032088|GO:0000122|GO:2000678|GO:0003677|GO:0010804|GO:0006351|GO:0046329|GO:0008270|GO:0043508|GO:0031625	23836893	chr19	23836834	-	hs|19p12	NM_138330	chr19:23836893-23836834	NM_138330	Hs.264345
A_33_P3235330	5.32199	2.41197	5.32199	up	myotubularin related protein 3	MTMR3	FALSE	Homo sapiens myotubularin related protein 3 (MTMR3), transcript variant 3, mRNA [NM_021090]	8897	GO:0006661|GO:0005730|GO:0005634|GO:0044281|GO:0046872|GO:0035335|GO:0005829|GO:0005737|GO:0006470|GO:0016020|GO:0004438|GO:0046856|GO:0004722|GO:0006644|GO:0004725	30426818	chr22	30426759	+	hs|22q12.2	NM_021090	chr22:30426759-30426818	NM_021090	Hs.474536
A_33_P3267356	5.32046	2.41155	5.32046	up	glutaminase	GLS	FALSE	Homo sapiens glutaminase (GLS), transcript variant 2, mRNA [NM_001256310]	2744	GO:0005515|GO:0006537|GO:0007268|GO:0008652|GO:0044281|GO:0014047|GO:0007269|GO:0005829|GO:0005739|GO:0034641|GO:0002087|GO:0001967|GO:0051289|GO:0005759|GO:0004359|GO:0006543	191797588	chr2	191797529	+	hs|2q32.2	NM_001256310	chr2:191797529-191797588	NM_001256310	Hs.116448
A_33_P3271599	5.31731	2.4107	5.31731	up	coiled-coil domain containing 125	CCDC125	FALSE	Homo sapiens coiled-coil domain containing 125 (CCDC125), mRNA [NM_176816]	202243	GO:0005737	68576655	chr5	68576596	-	hs|5q13.2	NM_176816	chr5:68576655-68576596	NM_176816	Hs.654850
A_23_P420831	5.28936	2.40309	5.28936	up	tripartite motif containing 10	TRIM10	FALSE	Homo sapiens tripartite motif containing 10 (TRIM10), transcript variant 2, mRNA [NM_052828]	10107	GO:0008150|GO:0003674|GO:0005737|GO:0030218|GO:0008270	30119937	chr6	30119878	-	hs|6p22.1	NM_052828	chr6:30119937-30119878	NM_052828	Hs.709483
A_23_P127385	5.2869	2.40242	5.2869	up	myosin binding protein C, cardiac	MYBPC3	FALSE	Homo sapiens myosin binding protein C, cardiac (MYBPC3), mRNA [NM_000256]	4607	GO:0005863|GO:0030049|GO:0055010|GO:0045214|GO:0006942|GO:0003779|GO:0032781|GO:0060048|GO:0030017|GO:0046872|GO:0042802|GO:0031432|GO:0005829|GO:0032971|GO:0003007|GO:0031034|GO:0002027|GO:0014705|GO:0017022|GO:0007155|GO:0008307|GO:0031672|GO:0001671|GO:0032036	47353223	chr11	47353164	-	hs|11p11.2	NM_000256	chr11:47353223-47353164	NM_000256	Hs.524906
A_19_P00318070	5.27736	2.39982	5.27736	up			FALSE				21886540	chr6	21886481	+	hs|6p22.3		chr6:021886481-021886540
A_19_P00323293	5.27321	2.39868	5.27321	up			FALSE				132289997	chr6	132289938	+	hs|6q23.2		chr6:132289938-132289997
A_24_P173754	5.25945	2.39491	5.25945	up	chromosome 1 open reading frame 21	C1orf21	FALSE	Homo sapiens chromosome 1 open reading frame 21 (C1orf21), mRNA [NM_030806]	81563		184588664	chr1	184567549	+	hs|1q25.3	NM_030806	chr1:184567549-184588664	NM_030806	Hs.744936
A_33_P3362296	5.25071	2.39251	5.25071	up	potassium voltage-gated channel, subfamily G, member 1	KCNG1	FALSE	potassium voltage-gated channel, subfamily G, member 1 [Source:HGNC Symbol;Acc:6248] [ENST00000396017]	3755	GO:0005251|GO:0005886|GO:0008076|GO:0007268|GO:0005267|GO:0051260|GO:0034765|GO:0006813|GO:0071805|GO:0043231	49625278	chr20	49625219	-	hs|20q13.13	XM_006723786	chr20:49625278-49625219	XM_006723786	Hs.118695
A_33_P3302344	5.2387	2.38921	5.2387	up	uncharacterized LOC100128320	LOC100128320	FALSE	Homo sapiens cDNA FLJ43449 fis, clone OCBBF2032671. [AK125438]	100128320		98827927	chr10	98827868	-	hs|10q24.1	AK125438	chr10:98827927-98827868		Hs.632082
A_33_P3254191	5.2247	2.38535	5.2247	up	oxysterol binding protein-like 8	OSBPL8	FALSE	Homo sapiens oxysterol binding protein-like 8 (OSBPL8), transcript variant 1, mRNA [NM_020841]	114882	GO:0051897|GO:0031965|GO:0030336|GO:0090204|GO:0015485|GO:0010891|GO:0006869|GO:0046628|GO:0045444	76748399	chr12	76748340	-	hs|12q21.2	NM_020841	chr12:76748399-76748340	NM_020841	Hs.430849
A_33_P3279920	5.21859	2.38366	5.21859	up	TAR DNA binding protein	TARDBP	FALSE	Homo sapiens TAR DNA binding protein (TARDBP), mRNA [NM_007375]	23435	GO:0005515|GO:0006397|GO:0008380|GO:0008219|GO:0006355|GO:0003700|GO:0006366|GO:0003723|GO:0005730|GO:0005634|GO:0043922|GO:0042802|GO:0003690|GO:0000166|GO:0003730|GO:0070935	11082306	chr1	11082247	+	hs|1p36.22	NM_007375	chr1:11082247-11082306	NM_007375	Hs.300624
A_23_P152235	5.21399	2.38239	5.21399	up	iroquois homeobox 3	IRX3	FALSE	Homo sapiens iroquois homeobox 3 (IRX3), mRNA [NM_024336]	79191	GO:0043565|GO:0001656|GO:0030424|GO:0006355|GO:0005737|GO:0003700|GO:0045665|GO:0045666|GO:0007498|GO:0005634|GO:0072086|GO:0006351	54317289	chr16	54317230	-	hs|16q12.2	NM_024336	chr16:54317289-54317230	NM_024336	Hs.499205
A_33_P3291619	5.21197	2.38183	5.21197	up	uncharacterized LOC399715	LOC399715	FALSE	Homo sapiens uncharacterized LOC399715 (LOC399715), long non-coding RNA [NR_040079]	399715		6377906	chr10	6377847	+	hs|10p15.1	NR_040079	chr10:6377847-6377906	NR_040079	Hs.58963
A_23_P130398	5.21184	2.38179	5.21184	up	cutaneous T-cell lymphoma-associated antigen 1	CTAGE1	FALSE	Homo sapiens cutaneous T-cell lymphoma-associated antigen 1 (CTAGE1), mRNA [NM_172241]	64693	GO:0008150|GO:0016021|GO:0005575	19994048	chr18	19993989	-	hs|18q11.2	NM_172241	chr18:19994048-19993989	NM_172241	Hs.406709
A_33_P3334108	5.20763	2.38063	5.20763	up	zinc finger protein 740	ZNF740	FALSE	Homo sapiens zinc finger protein 740 (ZNF740), mRNA [NM_001004304]	283337	GO:0006355|GO:0005634|GO:0003676|GO:0046872|GO:0006351	53584654	chr12	53584595	+	hs|12q13.13	NM_001004304	chr12:53584595-53584654	NM_001004304	Hs.524458
A_33_P3331426	5.20133	2.37888	5.20133	up			FALSE	Homo sapiens cDNA FLJ37786 fis, clone BRHIP2028480. [AK095105]			91910371	chr2	91910312	-	hs|2p11.1	TCONS_l2_00014690	chr2:91910371-91910312		Hs.631791
A_23_P361049	5.18507	2.37436	5.18507	up	myosin IB	MYO1B	FALSE	Homo sapiens myosin IB (MYO1B), transcript variant 2, mRNA [NM_012223]	4430	GO:0030048|GO:0005516|GO:0048471|GO:0005886|GO:0005884|GO:0005547|GO:0006892|GO:0005546|GO:0030175|GO:0016459|GO:0032588|GO:0005524|GO:0071944|GO:0005903|GO:0000146|GO:0005737|GO:0051015|GO:0008152|GO:0007015|GO:0051017|GO:0010008|GO:0005769|GO:0070062	192289867	chr2	192289808	+	hs|2q32.3	NM_012223	chr2:192289808-192289867	NM_012223	Hs.439620
A_23_P348257	5.16646	2.36918	5.16646	up	NUAK family, SNF1-like kinase, 1	NUAK1	FALSE	Homo sapiens NUAK family, SNF1-like kinase, 1 (NUAK1), mRNA [NM_014840]	9891	GO:0005515|GO:0035507|GO:0005730|GO:0005634|GO:0005524|GO:0030155|GO:0046872|GO:0006974|GO:0002039|GO:0005737|GO:0004674|GO:0042127|GO:0015630|GO:0006468|GO:2000772|GO:0007155	106457605	chr12	106457546	-	hs|12q23.3	NM_014840	chr12:106457605-106457546	NM_014840	Hs.524692
A_33_P3347055	5.16531	2.36886	5.16531	up			FALSE				44663537	chr18	44663478	+	hs|18q21.1		chr18:044663478-044663537
A_33_P3403851	5.15715	2.36658	5.15715	up			FALSE	O52K2_HUMAN (Q8NGK3) Olfactory receptor 52K2, partial (29%) [THC2647746]			4497080	chr11	4497021	+	hs|11p15.4		chr11:004497021-004497080
A_24_P636882	5.15698	2.36653	5.15698	up	serine/threonine kinase 17b	STK17B	FALSE	Homo sapiens serine/threonine kinase 17b (STK17B), mRNA [NM_004226]	9262	GO:0035556|GO:0005793|GO:0046777|GO:0004672|GO:0005886|GO:0004674|GO:0006915|GO:0006468|GO:0005634|GO:0015629|GO:0005524|GO:2000271	196998319	chr2	196998290	-	hs|2q32.3	NM_004226	chr2:196998319-196998290	NM_004226	Hs.88297
A_24_P145911	5.15582	2.3662	5.15582	up	transformer 2 beta homolog (Drosophila)	TRA2B	FALSE	transformer 2 beta homolog (Drosophila) [Source:HGNC Symbol;Acc:10781] [ENST00000342294]	6434	GO:0048026|GO:0005515|GO:0000166|GO:0000398|GO:0000381|GO:0000375|GO:0005634|GO:0003729	185649620	chr3	185649561	-	hs|3q27.2	XM_006713724	chr3:185649620-185649561	XM_006713724	Hs.533122
A_33_P3350549	5.1506	2.36474	5.1506	up			FALSE				67512844	chr11	67512785	-	hs|11q13.2		chr11:067512844-067512785
A_33_P3341656	5.14615	2.36349	5.14615	up	myocyte enhancer factor 2D	MEF2D	FALSE	Homo sapiens myocyte enhancer factor 2D (MEF2D), transcript variant 1, mRNA [NM_005920]	4209	GO:0005515|GO:0000977|GO:0003700|GO:0042826|GO:0006366|GO:0000981|GO:0005730|GO:0006915|GO:0005634|GO:0035914|GO:0001649|GO:0043231|GO:0007399|GO:0007512|GO:0001958|GO:0007517|GO:0002062|GO:0045944|GO:0046983|GO:0033613	156433658	chr1	156433599	-	hs|1q22	NM_005920	chr1:156433658-156433599	NM_005920	Hs.314327
A_33_P3324206	5.1452	2.36323	5.1452	up	hair growth associated	HR	FALSE	Homo sapiens hair growth associated (HR), transcript variant 1, mRNA [NM_005144]	55806	GO:0016604|GO:0006355|GO:0003700|GO:0003714|GO:0016491|GO:0005634|GO:0045892|GO:0003677|GO:0046872|GO:0006351|GO:0055114	21972023	chr8	21971964	-	hs|8p21.3	NM_005144	chr8:21972023-21971964	NM_005144	Hs.272367
A_33_P3322288	5.13131	2.35933	5.13131	up	5-azacytidine induced 2	AZI2	FALSE	Homo sapiens 5-azacytidine induced 2 (AZI2), transcript variant 3, mRNA [NM_001134433]	64343	GO:0005515|GO:0005737|GO:0007249	28378290	chr3	28378231	-	hs|3p24.1	NM_001134433	chr3:28378290-28378231	NM_001134433	Hs.706676
A_33_P3337733	5.12789	2.35836	5.12789	up			FALSE	Homo sapiens cDNA FLJ45831 fis, clone NT2RP8007416. [AK127731]			14671053	chr17	14670994	-	hs|17p12	AK127731	chr17:14671053-14670994		Hs.446616
A_19_P00331835	5.12086	2.35639	5.12086	up			FALSE				40305634	chr6	40305575	-	hs|6p21.2		chr6:040305634-040305575
A_24_P115967	5.10674	2.3524	5.10674	up	diacylglycerol lipase, alpha	DAGLA	FALSE	Homo sapiens diacylglycerol lipase, alpha (DAGLA), mRNA [NM_006133]	747	GO:0046340|GO:0019369|GO:0008219|GO:0004806|GO:0005886|GO:0007596|GO:0071926|GO:0030168|GO:0042136|GO:0016021|GO:0046872|GO:0007405	61514443	chr11	61514384	+	hs|11q12.2	NM_006133	chr11:61514384-61514443	NM_006133	Hs.241564
A_24_P342807	5.09499	2.34908	5.09499	up	solute carrier family 30 (zinc transporter), member 6	SLC30A6	FALSE	Homo sapiens solute carrier family 30 (zinc transporter), member 6 (SLC30A6), transcript variant 2, mRNA [NM_017964]	55676	GO:0005739|GO:0071577|GO:0005794|GO:0005385|GO:0000139|GO:0016021|GO:0055085|GO:0044267|GO:0006895	32446766	chr2	32446707	+	hs|2p22.3	NM_017964	chr2:32446707-32446766	NM_017964	Hs.23248
A_19_P00326387	5.09144	2.34807	5.09144	up			FALSE				120035966	chr10	120035907	-	hs|10q26.11		chr10:120035966-120035907
A_32_P751535	5.0893	2.34747	5.0893	up		XLOC_014512	FALSE	BROAD Institute lincRNA (XLOC_014512), lincRNA [TCONS_l2_00000681]			168907794	chr1	168907735	+	hs|1q24.2		chr1:168907735-168907794
A_19_P00809622	5.07921	2.3446	5.07921	up			FALSE				86975074	chr8	86975015	+	hs|8q21.3		chr8:086975015-086975074
A_33_P3394993	5.07363	2.34302	5.07363	up	phosphatidylinositol-3,4,5-trisphosphate-dependent Rac exchange factor 2	PREX2	FALSE	Homo sapiens phosphatidylinositol-3,4,5-trisphosphate-dependent Rac exchange factor 2 (PREX2), transcript variant 2, mRNA [NM_025170]	80243	GO:0035556|GO:0032314|GO:0007186|GO:0032855|GO:0030675|GO:0030676	69017597	chr8	69017538	+	hs|8q13.2	NM_025170	chr8:69017538-69017597	NM_025170	Hs.591867
A_19_P00810812	5.07196	2.34254	5.07196	up			FALSE				97645936	chrX	97645877	+	hs|Xq21.33		chrX:097645877-097645936
A_33_P3223056	5.05748	2.33842	5.05748	up	ADAM metallopeptidase with thrombospondin type 1 motif, 10	ADAMTS10	FALSE	Homo sapiens ADAM metallopeptidase with thrombospondin type 1 motif, 10 (ADAMTS10), transcript variant 1, mRNA [NM_030957]	81794	GO:0031012|GO:0005515|GO:0008150|GO:0003674|GO:0006508|GO:0001527|GO:0008270|GO:0004222	8645185	chr19	8645126	-	hs|19p13.2	NM_030957	chr19:8645185-8645126	NM_030957	Hs.657508
A_23_P316487	5.05074	2.3365	5.05074	up	H2A histone family, member V	H2AFV	FALSE	Homo sapiens H2A histone family, member V (H2AFV), transcript variant 2, mRNA [NM_138635]	94239	GO:0008150|GO:0003674|GO:0046982|GO:0006334|GO:0005634|GO:0000786|GO:0003677	44867532	chr7	44867473	-	hs|7p13	NM_138635	chr7:44867532-44867473	NM_138635	Hs.488189
A_33_P3394213	5.04656	2.3353	5.04656	up	glutamate receptor, ionotropic, N-methyl-D-aspartate 3B	GRIN3B	FALSE	Homo sapiens glutamate receptor, ionotropic, N-methyl-D-aspartate 3B (GRIN3B), mRNA [NM_138690]	116444	GO:0005262|GO:0005261|GO:0030054|GO:0005234|GO:0017146|GO:0030594|GO:0051205|GO:0035249|GO:0030425|GO:0035235|GO:0034220|GO:0004972|GO:0045211|GO:0070588|GO:0051924|GO:0043025|GO:0016594|GO:0042165	1009707	chr19	1009648	+	hs|19p13.3	NM_138690	chr19:1009648-1009707	NM_138690	Hs.660378
A_19_P00800632	5.03238	2.33124	5.03238	up			FALSE				152621507	chr2	152621448	-	hs|2q23.3		chr2:152621507-152621448
A_24_P75718	5.02398	2.32883	5.02398	up			FALSE				66039961	chr12	66039900	-	hs|12q14.3		chr12:066039961-066039900
A_19_P00321067	5.01878	2.32734	5.01878	up	myocardial infarction associated transcript (non-protein coding)	MIAT	FALSE	Homo sapiens myocardial infarction associated transcript (non-protein coding) (MIAT), transcript variant 1, long non-coding RNA [NR_003491]	440823		27066381	chr22	27066322	+	hs|22q12.1	NR_003491	chr22:27066322-27066381	NR_003491	Hs.517502
A_32_P198923	5.01538	2.32636	5.01538	up	tyrosine 3-monooxygenase/tryptophan 5-monooxygenase activation protein, zeta	YWHAZ	FALSE	Homo sapiens tyrosine 3-monooxygenase/tryptophan 5-monooxygenase activation protein, zeta (YWHAZ), transcript variant 2, mRNA [NM_145690]	7534	GO:0005515|GO:0010467|GO:0048471|GO:0006626|GO:0072562|GO:0005634|GO:0005615|GO:0032403|GO:0042629|GO:0042802|GO:0005829|GO:0005739|GO:0005737|GO:1900740|GO:0061024|GO:0031252|GO:0030659|GO:0070062|GO:0042470|GO:0043066|GO:0016070|GO:0019901|GO:0016071|GO:0042493|GO:0019904|GO:0006915|GO:0014069|GO:0030168|GO:0097193|GO:0043234|GO:0007165|GO:0002553|GO:0007596|GO:0005654|GO:0008134	101960895	chr8	101960836	-	hs|8q22.3	NM_145690	chr8:101960895-101960836	NM_145690	Hs.492407
A_19_P00811613	5.01197	2.32538	5.01197	up	uncharacterized LOC101930048	LOC101930048	FALSE	PREDICTED: Homo sapiens uncharacterized LOC101930048 (LOC101930048), transcript variant X1, ncRNA [XR_428438]	101930048		2503335	chr9	2503276	-	hs|9p24.2	XR_428438	chr9:2503335-2503276	XR_428438	Hs.416043
A_32_P389118	5.00455	2.32324	5.00455	up	HEAT repeat containing 5B	HEATR5B	FALSE	Homo sapiens HEAT repeat containing 5B (HEATR5B), mRNA [NM_019024]	54497	GO:0070062	37208378	chr2	37208319	-	hs|2p22.2	NM_019024	chr2:37208378-37208319	NM_019024	Hs.744084
A_24_P897062	4.99501	2.32049	4.99501	up	zinc finger protein 736	ZNF736	FALSE	Homo sapiens zinc finger protein 736 (ZNF736), mRNA [NM_001170905]	728927	GO:0006355|GO:0005634|GO:0003677|GO:0046872|GO:0006351	63809212	chr7	63809153	+	hs|7q11.21	NM_001170905	chr7:63809153-63809212	NM_001170905	Hs.734771
A_24_P273245	4.98965	2.31894	4.98965	up			FALSE	Q3UVJ2_MOUSE (Q3UVJ2) Adult male urinary bladder cDNA, RIKEN full-length enriched library, clone:9530052J16 product:CAP, adenylate cyclase-associated protein 1 (yeast), full insert sequence, partial (56%) [THC2593778]		GO:0000902|GO:0005737|GO:0030036|GO:0016020|GO:0001667|GO:0003779|GO:0030864|GO:0006898	76484303	chr3	76484244	+	hs|3p12.3		chr3:076484244-076484303
A_33_P3377391	4.97974	2.31607	4.97974	up	long intergenic non-protein coding RNA 1413	LINC01413	FALSE	Homo sapiens long intergenic non-protein coding RNA 1413 (LINC01413), long non-coding RNA [NR_120337]	101928611		57613156	chr15	57613097	+	hs|15q21.3	NR_120337	chr15:57613097-57613156	NR_120337
A_32_P19840	4.9781	2.3156	4.9781	up	uncharacterized LOC100507507	LOC100507507	FALSE	PREDICTED: Homo sapiens uncharacterized LOC100507507 (LOC100507507), mRNA [XM_006710194]	100507507		143076846	chr7	143076787	-	hs|7q34	XM_006710194	chr7:143076846-143076787	XM_006710194	Hs.626125
A_23_P69683	4.97178	2.31376	4.97178	up	SEC24 family member B	SEC24B	FALSE	Homo sapiens SEC24 family member B (SEC24B), transcript variant 1, mRNA [NM_006323]	10427	GO:0005515|GO:0002474|GO:0005215|GO:0012507|GO:0048471|GO:0030127|GO:0048208|GO:0044281|GO:0006886|GO:0005829|GO:0006888|GO:0019886|GO:0000139|GO:0016020|GO:0005789|GO:0061024|GO:0008270|GO:0016192|GO:0044267|GO:0043687|GO:0018279	110460941	chr4	110460882	+	hs|4q25	NM_006323	chr4:110460882-110460941	NM_006323	Hs.292472
A_33_P3245348	4.97119	2.31359	4.97119	up	keratin associated protein 4-1	KRTAP4-1	FALSE	Homo sapiens keratin associated protein 4-1 (KRTAP4-1), mRNA [NM_033060]	85285	GO:0045095	39341099	chr17	39341040	-	hs|17q21.2	NM_033060	chr17:39341099-39341040	NM_033060	Hs.437079
A_23_P374082	4.95682	2.30941	4.95682	up	ADAM metallopeptidase domain 19	ADAM19	FALSE	Homo sapiens ADAM metallopeptidase domain 19 (ADAM19), mRNA [NM_033274]	8728	GO:0007507|GO:0017124|GO:0008270|GO:0016021|GO:0006509|GO:0004222	156904534	chr5	156904475	-	hs|5q33.3	NM_033274	chr5:156904534-156904475	NM_033274	Hs.483944
A_24_P854492	4.9547	2.3088	4.9547	up	myocardial infarction associated transcript (non-protein coding)	MIAT	FALSE	Homo sapiens myocardial infarction associated transcript (non-protein coding) (MIAT), transcript variant 1, long non-coding RNA [NR_003491]	440823		27072401	chr22	27072342	+	hs|22q12.1	NR_003491	chr22:27072342-27072401	NR_003491	Hs.517502
A_33_P3370109	4.94386	2.30564	4.94386	up	inositol(myo)-1(or 4)-monophosphatase 1	IMPA1	FALSE	Homo sapiens inositol(myo)-1(or 4)-monophosphatase 1 (IMPA1), transcript variant 3, mRNA [NM_001144879]	3612	GO:0052833|GO:0052832|GO:0006021|GO:0006661|GO:0043647|GO:0006796|GO:0044281|GO:0046872|GO:0042803|GO:0005829|GO:0042802|GO:0007165|GO:0046854|GO:0005737|GO:0046855|GO:0008934|GO:0070062	82592967	chr8	82592908	-	hs|8q21.13	NM_001144879	chr8:82592967-82592908	NM_001144879	Hs.656694
A_23_P56787	4.9436	2.30556	4.9436	up	contactin associated protein-like 5	CNTNAP5	FALSE	Homo sapiens contactin associated protein-like 5 (CNTNAP5), mRNA [NM_130773]	129684	GO:0016021|GO:0007155	125672701	chr2	125672642	+	hs|2q14.3	NM_130773	chr2:125672642-125672701	NM_130773	Hs.660653
A_32_P203013	4.9377	2.30384	4.9377	up	ribosomal protein S10 pseudogene 7	RPS10P7	FALSE	Homo sapiens ribosomal protein S10 pseudogene 7 (RPS10P7), non-coding RNA [NR_026667]	376693		201489723	chr1	201489664	+	hs|1q32.1	NR_026667	chr1:201489664-201489723	NR_026667	Hs.605989
A_23_P139099	4.93596	2.30333	4.93596	up	olfactory receptor, family 4, subfamily A, member 15	OR4A15	FALSE	Homo sapiens olfactory receptor, family 4, subfamily A, member 15 (OR4A15), mRNA [NM_001005275]	81328	GO:0050911|GO:0004984|GO:0007186|GO:0005886|GO:0004930|GO:0016021	55136111	chr11	55136052	+	hs|11q11	NM_001005275	chr11:55136052-55136111	NM_001005275	Hs.554529
A_33_P3210228	4.92498	2.30012	4.92498	up	zinc finger, CCHC domain containing 6	ZCCHC6	FALSE	zinc finger, CCHC domain containing 6 [Source:HGNC Symbol;Acc:25817] [ENST00000375947]	79670	GO:0071044|GO:0031123|GO:0008270|GO:0050265	88959844	chr9	88959785	-	hs|9q21.33		chr9:88959844-88959785
A_24_P119131	4.92252	2.2994	4.92252	up	transmembrane protein 120B	TMEM120B	FALSE	Homo sapiens transmembrane protein 120B (TMEM120B), mRNA [NM_001080825]	144404	GO:0008150|GO:0003674|GO:0016021|GO:0005575	122219952	chr12	122219893	+	hs|12q24.31	NM_001080825	chr12:122219893-122219952	NM_001080825	Hs.644504
A_23_P211110	4.91182	2.29626	4.91182	up	single-minded family bHLH transcription factor 2	SIM2	FALSE	Homo sapiens single-minded family bHLH transcription factor 2 (SIM2), transcript variant SIM2, mRNA [NM_005069]	6493	GO:0003700|GO:0046982|GO:0030324|GO:0005730|GO:0005634|GO:0000122|GO:0003677|GO:0006351|GO:0030154|GO:0007399|GO:0009880|GO:0007165|GO:0004871	38122163	chr21	38122104	+	hs|21q22.13	NM_005069	chr21:38122104-38122163	NM_005069	Hs.146186
ERCC-00092_138	4.90668	2.29475	4.90668	up			pos	Unknown
A_24_P104091	4.90622	2.29461	4.90622	up	oral cancer overexpressed 1	ORAOV1	FALSE	Homo sapiens oral cancer overexpressed 1 (ORAOV1), mRNA [NM_153451]	220064	GO:0008150|GO:0003674|GO:0005575	69480423	chr11	69480364	-	hs|11q13.3	NM_153451	chr11:69480423-69480364	NM_153451	Hs.667996
A_33_P3264662	4.90165	2.29327	4.90165	up	cytochrome P450, family 27, subfamily C, polypeptide 1	CYP27C1	FALSE	Homo sapiens cytochrome P450, family 27, subfamily C, polypeptide 1 (CYP27C1), mRNA [NM_001001665]	339761	GO:0004497|GO:0016020|GO:0005506|GO:0016705|GO:0055114|GO:0020037	127941477	chr2	127941418	-	hs|2q14.3	NM_001001665	chr2:127941477-127941418	NM_001001665	Hs.407639
A_33_P3314212	4.89485	2.29126	4.89485	up	poly (ADP-ribose) glycohydrolase	PARG	FALSE	Homo sapiens poly (ADP-ribose) glycohydrolase (PARG), mRNA [NM_003631]	8505	GO:0005737|GO:0005975|GO:0005759|GO:0004649|GO:0005634|GO:0016045|GO:0006974|GO:0005829	51363266	chr10	51363207	-	hs|10q11.23	NM_003631	chr10:51363266-51363207	NM_003631	Hs.732225
A_23_P408108	4.8915	2.29028	4.8915	up	mitochondrial transcription termination factor	MTERF	FALSE	Homo sapiens mitochondrial transcription termination factor (MTERF), mRNA [NM_006980]	7978	GO:0042645|GO:0006353|GO:0005739|GO:0005515|GO:0010467|GO:0006355|GO:0003690|GO:0005759|GO:0032392|GO:0006390|GO:0006393	91502411	chr7	91502352	-	hs|7q21.2	NM_006980	chr7:91502411-91502352	NM_006980	Hs.532216
A_24_P179013	4.88646	2.28879	4.88646	up			FALSE	GB			3045709	chr6	3045650	+	hs|6p25.2		chr6:003045650-003045709
A_19_P00321945	4.88109	2.2872	4.88109	up			FALSE				14744441	chr4	14744382	-	hs|4p15.33		chr4:014744441-014744382
A_33_P3424794	4.86918	2.28368	4.86918	up			FALSE	Homo sapiens IFP38 (IFP38) mRNA, complete cds. [AF354444]			35529	chrUn_gl000212	35470	-		AF354444	chrUn_gl000212:35529-35470
A_23_P68167	4.8581	2.28039	4.8581	up	cyclic nucleotide gated channel alpha 3	CNGA3	FALSE	Homo sapiens cyclic nucleotide gated channel alpha 3 (CNGA3), transcript variant 1, mRNA [NM_001298]	1261	GO:0005223|GO:0046549|GO:0007603|GO:0042622|GO:0005222|GO:0031960|GO:0051591|GO:0030425|GO:0007165|GO:0005737|GO:0030553|GO:0005887|GO:0005249|GO:0042391|GO:0032026|GO:0006810|GO:0043204|GO:0007601|GO:0071805|GO:0006812|GO:0015276	99015053	chr2	99014994	+	hs|2q11.2	NM_001298	chr2:99014994-99015053	NM_001298	Hs.234785
A_24_P246351	4.82286	2.26989	4.82286	up	family with sequence similarity 71, member E1	FAM71E1	FALSE	Homo sapiens family with sequence similarity 71, member E1 (FAM71E1), mRNA [NM_138411]	112703		50970163	chr19	50970104	-	hs|19q13.33	NM_138411	chr19:50970163-50970104	NM_138411	Hs.448941
A_19_P00804580	4.8147	2.26744	4.8147	up			FALSE				65204924	chr7	65204865	-	hs|7q11.21		chr7:065204924-065204865
A_33_P3319331	4.81136	2.26644	4.81136	up	PR domain containing 2, with ZNF domain	PRDM2	FALSE	Homo sapiens cDNA FLJ41611 fis, clone CTONG3002020. [AK123605]	7799	GO:0006355|GO:0003700|GO:0034968|GO:0008270|GO:0005634|GO:0003677|GO:0006351|GO:0018024	14146969	chr1	14146910	+	hs|1p36.21	AK123605	chr1:14146910-14146969
A_19_P00315581	4.80097	2.26332	4.80097	up	long intergenic non-protein coding RNA 1122	LINC01122	FALSE	Homo sapiens long intergenic non-protein coding RNA 1122 (LINC01122), long non-coding RNA [NR_033873]	400955		59290716	chr2	59290657	+	hs|2p16.1	NR_033873	chr2:59290657-59290716	NR_033873	Hs.503210
A_33_P3335030	4.79902	2.26274	4.79902	up	ankyrin repeat domain 36	ANKRD36	FALSE	Homo sapiens ankyrin repeat domain 36 (ANKRD36), mRNA [NM_001164315]	375248		97871870	chr2	97871812	+	hs|2q11.2	NM_001164315	chr2:97871812-97871870	NM_001164315	Hs.541894
A_33_P3280521	4.79858	2.26261	4.79858	up	microfibrillar-associated protein 3-like	MFAP3L	FALSE	Homo sapiens microfibrillar-associated protein 3-like (MFAP3L), transcript variant 1, mRNA [NM_021647]	9848	GO:0005886|GO:0016021	170907809	chr4	170907750	-	hs|4q33	NM_021647	chr4:170907809-170907750	NM_021647	Hs.593942
A_32_P46191	4.79855	2.2626	4.79855	up	zinc finger protein 727, pseudogene	ZNF727P	FALSE	Homo sapiens zinc finger protein 727, pseudogene (ZNF727P), mRNA [NM_001159522]	442319	GO:0006355|GO:0005634|GO:0003677|GO:0046872|GO:0006351	63538655	chr7	63538596	+	hs|7q11.21	NM_001159522	chr7:63538596-63538655	NM_001159522	Hs.640774
A_33_P3280739	4.7974	2.26225	4.7974	up	RAB3 GTPase activating protein subunit 1 (catalytic)	RAB3GAP1	FALSE	Homo sapiens RAB3 GTPase activating protein subunit 1 (catalytic) (RAB3GAP1), transcript variant 1, mRNA [NM_001172435]	22930	GO:0017137|GO:0005737|GO:0060325|GO:0007420|GO:0032851|GO:0043010|GO:0021854|GO:0034389|GO:0043087|GO:0005097|GO:0070062	135927535	chr2	135927476	+	hs|2q21.3	NM_001172435	chr2:135927476-135927535	NM_001172435	Hs.306327
A_23_P43107	4.79706	2.26215	4.79706	up	dendrocyte expressed seven transmembrane protein	DCSTAMP	FALSE	Homo sapiens dendrocyte expressed seven transmembrane protein (DCSTAMP), transcript variant 1, mRNA [NM_030788]	81501	GO:0005515|GO:0030308|GO:0072675|GO:0036006|GO:0009986|GO:0030316|GO:0030176|GO:0045780|GO:0045657|GO:0005887|GO:0033116|GO:0071356|GO:0005789|GO:0071353|GO:0061025|GO:0016021|GO:0043011|GO:0010008|GO:0034241	105368690	chr8	105368631	+	hs|8q22.3	NM_030788	chr8:105368631-105368690	NM_030788	Hs.652230
A_33_P3221960	4.78644	2.25895	4.78644	up	interleukin 18 receptor accessory protein	IL18RAP	FALSE	Homo sapiens interleukin 18 receptor accessory protein (IL18RAP), mRNA [NM_003853]	8807	GO:0006955|GO:0006954|GO:0004872|GO:0016021|GO:0007166	103068754	chr2	103068695	+	hs|2q12.1	NM_003853	chr2:103068695-103068754	NM_003853	Hs.158315
A_32_P16489	4.78089	2.25728	4.78089	up	mitochondrial ribosomal protein L35	MRPL35	FALSE	Homo sapiens mitochondrial ribosomal protein L35 (MRPL35), transcript variant 2, mRNA [NM_145644]	51318	GO:0003735|GO:0005761|GO:0006412	86437716	chr2	86437658	+	hs|2p11.2	NM_145644	chr2:86437658-86437716	NM_145644	Hs.433439
A_33_P3341429	4.77767	2.25631	4.77767	up	nexilin (F actin binding protein)	NEXN	FALSE	Homo sapiens nexilin (F actin binding protein) (NEXN), transcript variant 1, mRNA [NM_144573]	91624	GO:0030334|GO:0048739|GO:0030018|GO:0051015|GO:0051493|GO:0042981|GO:0006468|GO:0008307|GO:0005924|GO:0005856|GO:0004683	78383957	chr1	78383898	+	hs|1p31.1	NM_144573	chr1:78383898-78383957	NM_144573	Hs.612385
A_33_P3570223	4.76902	2.25369	4.76902	up	actin, gamma 1 pseudogene	LOC644961	FALSE	Homo sapiens mRNA; cDNA DKFZp686I06131 (from clone DKFZp686I06131). [BX648289]	644961		27653022	chr1	27652963	+	hs|1p36.11	BX648289	chr1:27652963-27653022		Hs.660887
A_33_P3311750	4.769	2.25369	4.769	up	coiled-coil domain containing 144A	CCDC144A	FALSE	Homo sapiens coiled-coil domain containing 144A (CCDC144A), mRNA [NM_014695]	9720		16638903	chr17	16638844	+	hs|17p11.2	NM_014695	chr17:16638844-16638903	NM_014695	Hs.745246
A_24_P498854	4.76794	2.25337	4.76794	up	long intergenic non-protein coding RNA 1114	LINC01114	FALSE	Homo sapiens long intergenic non-protein coding RNA 1114 (LINC01114), long non-coding RNA [NR_038231]	284998		105363183	chr2	105363124	-	hs|2q12.1	NR_038231	chr2:105363183-105363124	NR_038231	Hs.410180
A_33_P3233953	4.76527	2.25256	4.76527	up			FALSE				138153081	chr9	138153022	+	hs|9q34.3		chr9:138153022-138153081
A_32_P115050	4.76135	2.25137	4.76135	up	HHIP antisense RNA 1	HHIP-AS1	FALSE	Homo sapiens HHIP antisense RNA 1 (HHIP-AS1), long non-coding RNA [NR_037595]	646576		145564837	chr4	145564778	-	hs|4q31.21	NR_037595	chr4:145564837-145564778	NR_037595	Hs.632595
A_19_P00327738	4.76035	2.25107	4.76035	up			FALSE				124029395	chr10	124029336	-	hs|10q26.13		chr10:124029395-124029336
A_24_P221575	4.7532	2.2489	4.7532	up	RUN and FYVE domain containing 3	RUFY3	FALSE	Homo sapiens RUN and FYVE domain containing 3 (RUFY3), transcript variant 1, mRNA [NM_001037442]	22902	GO:0050771|GO:0030175|GO:0030426	71648887	chr4	71648827	+	hs|4q13.3	NM_001037442	chr4:71648827-71648887	NM_001037442	Hs.740904
A_33_P3340639	4.74912	2.24766	4.74912	up	glycerol-3-phosphate acyltransferase, mitochondrial	GPAM	FALSE	glycerol-3-phosphate acyltransferase, mitochondrial [Source:HGNC Symbol;Acc:24865] [ENST00000369425]	57678	GO:0006637|GO:0070970|GO:0005886|GO:0070236|GO:0005743|GO:0055089|GO:0004366|GO:0005741|GO:0044281|GO:0009749|GO:0042104|GO:0051607|GO:0006631|GO:0016024|GO:0019432|GO:0055091|GO:0050707|GO:0016021|GO:0040018|GO:0006644|GO:0006654|GO:0044255|GO:0046474	113913749	chr10	113913690	-	hs|10q25.2	AL832464	chr10:113913749-113913690		Hs.42586
A_23_P63847	4.74268	2.2457	4.74268	up	suppressor of var1, 3-like 1 (S. cerevisiae)	SUPV3L1	FALSE	Homo sapiens suppressor of var1, 3-like 1 (S. cerevisiae) (SUPV3L1), mRNA [NM_003171]	6832	GO:0005515|GO:0003725|GO:0042645|GO:0000962|GO:0000965|GO:0006200|GO:0030307|GO:0003723|GO:0035946|GO:0035945|GO:0005634|GO:0042803|GO:0005739|GO:0004004|GO:0005759|GO:0032508|GO:0070827|GO:0043066|GO:0004386|GO:0000958|GO:0006310|GO:2000827|GO:0005524|GO:0003677|GO:0003678|GO:0006401|GO:0070584|GO:0045025|GO:0034458	70968747	chr10	70968688	+	hs|10q22.1	NM_003171	chr10:70968688-70968747	NM_003171	Hs.106469
A_23_P92520	4.74047	2.24503	4.74047	up	acidic (leucine-rich) nuclear phosphoprotein 32 family, member C	ANP32C	FALSE	Homo sapiens acidic (leucine-rich) nuclear phosphoprotein 32 family, member C (ANP32C), mRNA [NM_012403]	23520		165118708	chr4	165118649	-	hs|4q32.3	NM_012403	chr4:165118708-165118649	NM_012403	Hs.661161
A_24_P16249	4.73866	2.24448	4.73866	up	zinc finger protein 479	ZNF479	FALSE	Homo sapiens zinc finger protein 479 (ZNF479), mRNA [NM_033273]	90827	GO:0006355|GO:0005634|GO:0003677|GO:0046872|GO:0006351	57188441	chr7	57188382	-	hs|7p11.2	NM_033273	chr7:57188441-57188382	NM_033273	Hs.616660
A_23_P157963	4.73619	2.24373	4.73619	up	centlein, centrosomal protein	CNTLN	FALSE	Homo sapiens centlein, centrosomal protein (CNTLN), transcript variant 1, mRNA [NM_017738]	54875	GO:0023014|GO:0008150|GO:0003674|GO:0000160|GO:0016020|GO:0005814|GO:0000155|GO:0070062	17503126	chr9	17503067	+	hs|9p22.2	NM_017738	chr9:17503067-17503126	NM_017738	Hs.435381
A_19_P00325595	4.73173	2.24237	4.73173	up			FALSE				133073545	chr8	133073486	-	hs|8q24.22		chr8:133073545-133073486
A_33_P3233947	4.72732	2.24102	4.72732	up	COX20 cytochrome C oxidase assembly factor	COX20	FALSE	Homo sapiens COX20 cytochrome C oxidase assembly factor (COX20), mRNA [NM_198076]	116228	GO:0005739|GO:0031966|GO:0016021	245006528	chr1	245006469	+	hs|1q44	NM_198076	chr1:245006469-245006528	NM_198076	Hs.411490
A_33_P3268181	4.71991	2.23876	4.71991	up	LIM and senescent cell antigen-like domains 2	LIMS2	FALSE	Homo sapiens LIM and senescent cell antigen-like domains 2 (LIMS2), transcript variant 5, mRNA [NM_001161404]	55679	GO:2001046|GO:0016337|GO:0005886|GO:0034329|GO:0008270|GO:0005634|GO:0005925|GO:0045216|GO:0005829	128396967	chr2	128396908	-	hs|2q14.3	NM_001161404	chr2:128396967-128396908	NM_001161404	Hs.469881
A_24_P307384	4.71312	2.23668	4.71312	up			FALSE				145767984	chr4	145767923	+	hs|4q31.21		chr4:145767923-145767984
A_33_P3317937	4.70408	2.23391	4.70408	up	keratin associated protein 20-1	KRTAP20-1	FALSE	Homo sapiens keratin associated protein 20-1 (KRTAP20-1), mRNA [NM_181615]	337975	GO:0005882	31988833	chr21	31988774	+	hs|21q22.11	NM_181615	chr21:31988774-31988833	NM_181615	Hs.553697
A_24_P205036	4.69258	2.23038	4.69258	up	zinc finger protein 676	ZNF676	FALSE	Homo sapiens zinc finger protein 676 (ZNF676), mRNA [NM_001001411]	163223	GO:0006355|GO:0005634|GO:0003677|GO:0046872|GO:0006351	22362430	chr19	22362371	-	hs|19p12	NM_001001411	chr19:22362430-22362371	NM_001001411	Hs.55452
A_24_P940086	4.6916	2.23008	4.6916	up	neurexophilin 3	NXPH3	FALSE	Homo sapiens neurexophilin 3 (NXPH3), mRNA [NM_007225]	11248	GO:0003674|GO:0007218|GO:0005102|GO:0005576	47660552	chr17	47660493	+	hs|17q21.33	NM_007225	chr17:47660493-47660552	NM_007225	Hs.55069
A_23_P50946	4.6899	2.22956	4.6899	up	receptor (G protein-coupled) activity modifying protein 1	RAMP1	FALSE	Homo sapiens receptor (G protein-coupled) activity modifying protein 1 (RAMP1), mRNA [NM_005855]	10267	GO:0004948|GO:0005515|GO:0005886|GO:0009986|GO:0030819|GO:0031716|GO:0001525|GO:0015031|GO:0015026|GO:0072659|GO:0005615|GO:0006886|GO:0043235|GO:0031623|GO:0008277|GO:0007186|GO:0005887|GO:0008565|GO:0004872|GO:0006816|GO:0060050	238820720	chr2	238820661	+	hs|2q37.3	NM_005855	chr2:238820661-238820720	NM_005855	Hs.471783
A_33_P3391375	4.67601	2.22528	4.67601	up	LanC lantibiotic synthetase component C-like 3 (bacterial)	LANCL3	FALSE	Homo sapiens LanC lantibiotic synthetase component C-like 3 (bacterial) (LANCL3), transcript variant 1, mRNA [NM_198511]	347404	GO:0008152|GO:0003824	37536611	chrX	37536552	+	hs|Xp21.1	NM_198511	chrX:37536552-37536611	NM_198511	Hs.521932
A_23_P126103	4.6696	2.2233	4.6696	up	cystathionase (cystathionine gamma-lyase)	CTH	FALSE	Homo sapiens cystathionase (cystathionine gamma-lyase) (CTH), transcript variant 1, mRNA [NM_001902]	1491	GO:0005515|GO:0019344|GO:0005516|GO:0070814|GO:0019346|GO:2001234|GO:0006534|GO:0005634|GO:0044540|GO:0044281|GO:0005829|GO:0030968|GO:0018272|GO:0034641|GO:0005737|GO:0051092|GO:0051289|GO:0004123|GO:0043123|GO:0070062|GO:0016846|GO:0043066|GO:0047982|GO:0080146|GO:0000096|GO:0000098|GO:0030170|GO:0044524	70905100	chr1	70905041	+	hs|1p31.1	NM_001902	chr1:70905041-70905100	NM_001902	Hs.19904
A_33_P3214436	4.66828	2.22289	4.66828	up	TSEN15 tRNA splicing endonuclease subunit	TSEN15	FALSE	Homo sapiens TSEN15 tRNA splicing endonuclease subunit (TSEN15), transcript variant 3, non-coding RNA [NR_023349]	116461	GO:0006397|GO:0006388|GO:0005730|GO:0000213	184039810	chr1	184039751	+	hs|1q25.3	NR_023349	chr1:184039751-184039810	NR_023349	Hs.548197
A_32_P84454	4.65765	2.2196	4.65765	up	SLC25A21 antisense RNA 1	SLC25A21-AS1	FALSE	Homo sapiens SLC25A21 antisense RNA 1 (SLC25A21-AS1), long non-coding RNA [NR_033240]	100129794		37642624	chr14	37642565	+	hs|14q13.3	NR_033240	chr14:37642565-37642624	NR_033240	Hs.601579
A_23_P354175	4.65044	2.21737	4.65044	up	transmembrane protein 129	TMEM129	FALSE	Homo sapiens transmembrane protein 129 (TMEM129), transcript variant 2, mRNA [NM_138385]	92305	GO:0008150|GO:0003674|GO:0016021|GO:0005575	1717772	chr4	1717713	-	hs|4p16.3	NM_138385	chr4:1717772-1717713	NM_138385	Hs.518562
A_23_P401547	4.64573	2.2159	4.64573	up	poliovirus receptor-related 3	PVRL3	FALSE	Homo sapiens poliovirus receptor-related 3 (PVRL3), transcript variant 1, mRNA [NM_015480]	25945	GO:0005515|GO:0005886|GO:0034329|GO:0060042|GO:0045216|GO:0042803|GO:0009566|GO:0043296|GO:0016337|GO:0005913|GO:0002089|GO:0045211|GO:0016021|GO:0050839|GO:0007156|GO:0034332	110852799	chr3	110852740	+	hs|3q13.13	NM_015480	chr3:110852740-110852799	NM_015480	Hs.293917
A_23_P388900	4.63681	2.21313	4.63681	up	solute carrier family 22, member 15	SLC22A15	FALSE	Homo sapiens solute carrier family 22, member 15 (SLC22A15), mRNA [NM_018420]	55356	GO:0022857|GO:0016021|GO:0055085|GO:0006811	116611870	chr1	116611811	+	hs|1p13.1	NM_018420	chr1:116611811-116611870	NM_018420	Hs.125482
A_19_P00323041	4.62908	2.21073	4.62908	up	JPX transcript, XIST activator (non-protein coding)	JPX	FALSE	JPX transcript, XIST activator (non-protein coding) [Source:HGNC Symbol;Acc:37191] [ENST00000415215]	554203		73167173	chrX	73167114	+	hs|Xq13.2		chrX:73167114-73167173		Hs.648316
A_24_P177279	4.62572	2.20968	4.62572	up	cold shock domain containing C2, RNA binding	CSDC2	FALSE	Homo sapiens cold shock domain containing C2, RNA binding (CSDC2), mRNA [NM_014460]	27254	GO:0006397|GO:0006355|GO:0005737|GO:0003723|GO:0005634|GO:0003677	41972197	chr22	41972138	+	hs|22q13.2	NM_014460	chr22:41972138-41972197	NM_014460	Hs.310893
A_33_P3262022	4.60803	2.20415	4.60803	up			FALSE				50273205	chr12	50273146	+	hs|12q13.12		chr12:050273146-050273205
A_19_P00330942	4.60569	2.20342	4.60569	up			FALSE				30884548	chr13	30884489	-	hs|13q12.3		chr13:030884548-030884489
A_33_P3383371	4.59826	2.20109	4.59826	up			FALSE				37435593	chr9	37435534	+	hs|9p13.2		chr9:037435534-037435593
A_23_P341349	4.59705	2.20071	4.59705	up	calpain 10	CAPN10	FALSE	Homo sapiens calpain 10 (CAPN10), transcript variant 1, mRNA [NM_023083]	11132	GO:0008092|GO:0032388|GO:0032869|GO:0005886|GO:0031532|GO:0005623|GO:2000676|GO:0006921|GO:0005829|GO:0005739|GO:0004198|GO:0097050|GO:0046326|GO:0000149|GO:0006508|GO:0032024	241538510	chr2	241538451	+	hs|2q37.3	NM_023083	chr2:241538451-241538510	NM_023083	Hs.728234
A_33_P3279379	4.58758	2.19773	4.58758	up	destrin (actin depolymerizing factor) pseudogene 2	DSTNP2	FALSE	Homo sapiens destrin (actin depolymerizing factor) pseudogene 2 (DSTNP2), non-coding RNA [NR_033796]	171220		6994371	chr12	6994312	+	hs|12p13.31	NR_033796	chr12:6994312-6994371	NR_033796	Hs.661103
A_33_P3421515	4.58551	2.19708	4.58551	up			FALSE				27676847	chr3	27676788	+	hs|3p24.1		chr3:027676788-027676847
A_23_P390734	4.5835	2.19645	4.5835	up	FGFR1 oncogene partner 2	FGFR1OP2	FALSE	Homo sapiens FGFR1 oncogene partner 2 (FGFR1OP2), transcript variant 1, mRNA [NM_015633]	26127	GO:0042060|GO:0042803|GO:0005829	27118847	chr12	27118788	+	hs|12p11.23	NM_015633	chr12:27118788-27118847	NM_015633	Hs.591162
A_19_P00326527	4.5825	2.19614	4.5825	up			FALSE				75207850	chr15	75207791	+	hs|15q24.2		chr15:075207791-075207850
A_19_P00809027	4.57501	2.19377	4.57501	up			FALSE				74898311	chrX	74898252	+	hs|Xq13.3		chrX:074898252-074898311
A_24_P85317	4.57014	2.19224	4.57014	up	chromodomain helicase DNA binding protein 2	CHD2	FALSE	Homo sapiens chromodomain helicase DNA binding protein 2 (CHD2), transcript variant 2, mRNA [NM_001042572]	1106	GO:0006357|GO:0005634|GO:0060218|GO:0003677|GO:0005524|GO:0006351|GO:0006974|GO:0042393|GO:0004003|GO:0007517|GO:0001046|GO:0032508|GO:0070062|GO:0016568	93487662	chr15	93486257	+	hs|15q26.1	NM_001042572	chr15:93486257-93487662	NM_001042572	Hs.220864
A_33_P3231923	4.5566	2.18796	4.5566	up	uncharacterized LOC101927285	LOC101927285	FALSE	Homo sapiens uncharacterized LOC101927285 (LOC101927285), long non-coding RNA [NR_110219]	101927285		59506512	chr2	59506453	+	hs|2p16.1	NR_110219	chr2:59506453-59506512	NR_110219	Hs.570209
A_24_P398130	4.51283	2.17403	4.51283	up	USP6 N-terminal like	USP6NL	FALSE	Homo sapiens USP6 N-terminal like (USP6NL), transcript variant 1, mRNA [NM_014688]	9712	GO:0035526|GO:0005794|GO:0007030|GO:0032851|GO:0016023|GO:0031410|GO:0005097	11502756	chr10	11502697	-	hs|10p14	NM_014688	chr10:11502756-11502697	NM_014688	Hs.498661
A_33_P3390086	4.50051	2.17009	4.50051	up			FALSE				75429579	chr3	75429520	-	hs|3p12.3		chr3:075429579-075429520
A_23_P111361	4.49111	2.16707	4.49111	up	peptidylprolyl isomerase (cyclophilin)-like 6	PPIL6	FALSE	Homo sapiens peptidylprolyl isomerase (cyclophilin)-like 6 (PPIL6), transcript variant 1, mRNA [NM_173672]	285755	GO:0000413|GO:0006457|GO:0003755	109714104	chr6	109714045	-	hs|6q21	NM_173672	chr6:109714104-109714045	NM_173672	Hs.32234
A_33_P3363260	4.4907	2.16694	4.4907	up	phosphoglucomutase 2-like 1	PGM2L1	FALSE	Homo sapiens phosphoglucomutase 2-like 1 (PGM2L1), mRNA [NM_173582]	283209	GO:0047933|GO:0016310|GO:0005978|GO:0004614|GO:0019388|GO:0006006|GO:0005829	74041421	chr11	74041362	-	hs|11q13.4	NM_173582	chr11:74041421-74041362	NM_173582	Hs.26612
A_33_P3374684	4.49011	2.16675	4.49011	up			FALSE				34681497	chr16	34681438	-	hs|16p11.1		chr16:34681497-34681438
A_33_P3422802	4.47638	2.16233	4.47638	up	UL16 binding protein 1	ULBP1	FALSE	Homo sapiens UL16 binding protein 1 (ULBP1), mRNA [NM_025218]	80329	GO:0030101|GO:0005886|GO:0019882|GO:0005783|GO:0046703|GO:0042267|GO:0050776|GO:0046658|GO:0003823	150294741	chr6	150294682	+	hs|6q25.1	NM_025218	chr6:150294682-150294741	NM_025218	Hs.653255
A_19_P00800767	4.47027	2.16036	4.47027	up			FALSE				131878000	chr10	131877941	-	hs|10q26.3		chr10:131878000-131877941
A_33_P3222018	4.46656	2.15916	4.46656	up	chromobox homolog 3	CBX3	FALSE	Homo sapiens chromobox homolog 3 (CBX3), transcript variant 1, mRNA [NM_007276]	11335	GO:0005515|GO:0005719|GO:0019904|GO:0005819|GO:0005637|GO:0005634|GO:0005635|GO:0006351|GO:0042802|GO:0005720|GO:0000779|GO:0006338|GO:0031618|GO:0019899|GO:0045892|GO:0000785	26248138	chr7	26248079	+	hs|7p15.2	NM_007276	chr7:26248079-26248138	NM_007276	Hs.381189
A_32_P197825	4.46129	2.15746	4.46129	up	plasminogen-like B1	PLGLB1	FALSE	Homo sapiens plasminogen-like B1 (PLGLB1), mRNA [NM_001032392]	5343	GO:0005576	87243458	chr2	87240217	-	hs|2p11.2	NM_001032392	chr2:87243458-87240217	NM_001032392	Hs.652174
A_33_P3323059	4.45533	2.15553	4.45533	up	zinc finger protein 320	ZNF320	FALSE	zinc finger protein 320 [Source:HGNC Symbol;Acc:13842] [ENST00000595202]	162967	GO:0006355|GO:0003700|GO:0005634|GO:0003677|GO:0046872|GO:0006351	53367217	chr19	53367158	-	hs|19q13.41	AK307375	chr19:53367217-53367158		Hs.369632
A_23_P122439	4.45355	2.15496	4.45355	up	butyrophilin, subfamily 2, member A2	BTN2A2	FALSE	Homo sapiens butyrophilin, subfamily 2, member A2 (BTN2A2), transcript variant 2, mRNA [NM_181531]	10385	GO:0031324|GO:0046007|GO:0016021|GO:0050710|GO:0070062	26394085	chr6	26394026	+	hs|6p22.2	NM_181531	chr6:26394026-26394085	NM_181531	Hs.373938
A_23_P215454	4.44931	2.15358	4.44931	up	elastin	ELN	FALSE	Homo sapiens elastin (ELN), transcript variant 13, mRNA [NM_001278939]	2006	GO:0005515|GO:0007585|GO:0008283|GO:0008015|GO:0043149|GO:0050840|GO:0005578|GO:0005576|GO:0030023|GO:0071953|GO:0005739|GO:0030833|GO:0022617|GO:0030198|GO:0001974|GO:0007519|GO:0009887|GO:0005201	73483658	chr7	73483599	+	hs|7q11.23	NM_001278939	chr7:73483599-73483658	NM_001278939	Hs.647061
A_33_P3245389	4.44919	2.15354	4.44919	up	transmembrane protein 260	TMEM260	FALSE	Homo sapiens transmembrane protein 260 (TMEM260), mRNA [NM_017799]	54916	GO:0016021	57116151	chr14	57116092	+	hs|14q22.3	NM_017799	chr14:57116092-57116151	NM_017799	Hs.497253
A_23_P107963	4.44365	2.15175	4.44365	up	fucosyltransferase 1 (galactoside 2-alpha-L-fucosyltransferase, H blood group)	FUT1	FALSE	Homo sapiens fucosyltransferase 1 (galactoside 2-alpha-L-fucosyltransferase, H blood group) (FUT1), mRNA [NM_000148]	2523	GO:0042355|GO:0005794|GO:0016020|GO:0005975|GO:0005887|GO:0032580|GO:0008417|GO:0008107|GO:0006486|GO:0036065	49251325	chr19	49251268	-	hs|19q13.33	NM_000148	chr19:49251325-49251268	NM_000148	Hs.69747
A_19_P00320229	4.44281	2.15147	4.44281	up	uncharacterized LOC441172	FLJ46906	FALSE	Homo sapiens uncharacterized LOC441172 (FLJ46906), long non-coding RNA [NR_033896]	441172		139015629	chr6	139015570	+	hs|6q24.1	NR_033896	chr6:139015570-139015629	NR_033896	Hs.92290
A_32_P226567	4.44168	2.15111	4.44168	up	UPF3 regulator of nonsense transcripts homolog A (yeast)	UPF3A	FALSE	Homo sapiens UPF3 regulator of nonsense transcripts homolog A (yeast) (UPF3A), transcript variant 1, mRNA [NM_023011]	65110	GO:0005515|GO:0010467|GO:0005886|GO:0016070|GO:0016071|GO:0003723|GO:0005730|GO:0045727|GO:0005634|GO:0005829|GO:0006913|GO:0005737|GO:0000166|GO:0000184|GO:0005487|GO:0051028|GO:0035145	115070576	chr13	115070517	+	hs|13q34	NM_023011	chr13:115070517-115070576	NM_023011	Hs.533855
A_23_P339818	4.43863	2.15011	4.43863	up	arrestin domain containing 4	ARRDC4	FALSE	Homo sapiens arrestin domain containing 4 (ARRDC4), mRNA [NM_183376]	91947	GO:0005886|GO:0051443|GO:0005768	98516954	chr15	98516895	+	hs|15q26.3	NM_183376	chr15:98516895-98516954	NM_183376	Hs.6093
A_33_P3413541	4.43709	2.14961	4.43709	up	ring finger protein 138, E3 ubiquitin protein ligase pseudogene 1	RNF138P1	FALSE	Homo sapiens ring finger protein 138, E3 ubiquitin protein ligase pseudogene 1 (RNF138P1), non-coding RNA [NR_001575]	379013		54824933	chr5	54824874	-	hs|5q11.2	NR_001575	chr5:54824933-54824874	NR_001575	Hs.745164
A_33_P3299754	4.4361	2.14929	4.4361	up	RAB18, member RAS oncogene family	RAB18	FALSE	Homo sapiens RAB18, member RAS oncogene family (RAB18), transcript variant 5, mRNA [NM_001256412]	22931	GO:0005515|GO:0005886|GO:0007264|GO:0001654|GO:0003924|GO:0005525|GO:0015031|GO:0034389|GO:0005622|GO:0006184|GO:0007420|GO:0019003|GO:0070062	27815818	chr10	27815759	+	hs|10p12.1	NM_001256412	chr10:27815759-27815818	NM_001256412	Hs.406799
A_23_P100602	4.43582	2.1492	4.43582	up	tubulin folding cofactor D	TBCD	FALSE	Homo sapiens tubulin folding cofactor D (TBCD), mRNA [NM_005993]	6904	GO:0005515|GO:0031115|GO:0005874|GO:0034333|GO:0051087|GO:0048487|GO:0010812|GO:0016328|GO:0043547|GO:0005737|GO:0070830|GO:0005912|GO:0006457|GO:0051084|GO:0005923|GO:0007023|GO:0044267|GO:0005096	80895222	chr17	80895163	+	hs|17q25.3	NM_005993	chr17:80895163-80895222	NM_005993	Hs.464391
A_33_P3216008	4.43526	2.14902	4.43526	up	spindle and kinetochore associated complex subunit 3	SKA3	FALSE	Homo sapiens spindle and kinetochore associated complex subunit 3 (SKA3), transcript variant 1, mRNA [NM_145061]	221150	GO:0005515|GO:0007067|GO:0005737|GO:0000940|GO:0007059|GO:0031110|GO:0005876	21727794	chr13	21727735	-	hs|13q12.11	NM_145061	chr13:21727794-21727735	NM_145061	Hs.88523
A_23_P72096	4.43442	2.14874	4.43442	up	interleukin 1, alpha	IL1A	FALSE	Homo sapiens interleukin 1, alpha (IL1A), mRNA [NM_000575]	3552	GO:0005515|GO:0008285|GO:0008283|GO:0019221|GO:0050715|GO:0005615|GO:0035234|GO:0005829|GO:0034605|GO:0006955|GO:0006954|GO:0045944|GO:2001240|GO:0001660|GO:0051781|GO:0005149|GO:0005507|GO:0006915|GO:0005576|GO:0045840|GO:0005125|GO:0010575|GO:0045766|GO:0097192|GO:0045086|GO:0046688	113532421	chr2	113532362	-	hs|2q13	NM_000575	chr2:113532421-113532362	NM_000575	Hs.1722
A_23_P146284	4.43006	2.14733	4.43006	up	squalene epoxidase	SQLE	FALSE	Homo sapiens squalene epoxidase (SQLE), mRNA [NM_003129]	6713	GO:0006695|GO:0006725|GO:0010033|GO:0050660|GO:0016126|GO:0005789|GO:0004506|GO:0044281|GO:0016021|GO:0055114	126034502	chr8	126034443	+	hs|8q24.13	NM_003129	chr8:126034443-126034502	NM_003129	Hs.71465
A_33_P3477521	4.42939	2.14711	4.42939	up	uncharacterized LOC284080	LOC284080	FALSE	Homo sapiens uncharacterized LOC284080 (LOC284080), long non-coding RNA [NR_038230]	284080		48127772	chr17	48127713	-	hs|17q21.33		chr17:48127772-48127713	NR_038230	Hs.274864
A_33_P3260500	4.42591	2.14597	4.42591	up	breast cancer estrogen-induced apoptosis 2	BREA2	FALSE	Homo sapiens breast cancer estrogen-induced apoptosis 2 (BREA2), long non-coding RNA [NR_015445]	286076		144780577	chr8	144780518	+	hs|8q24.3	NR_015445	chr8:144780518-144780577	NR_015445	Hs.178095
A_33_P3243887	4.41719	2.14313	4.41719	up	interleukin 11	IL11	FALSE	Homo sapiens interleukin 11 (IL11), transcript variant 1, mRNA [NM_000641]	3589	GO:0008284|GO:0005142|GO:0007267|GO:0050731|GO:0005576|GO:0005125|GO:0005615|GO:0046888|GO:0005737|GO:0033138|GO:0045944|GO:0030219|GO:0030183|GO:0045444|GO:0043410|GO:0008083	55875847	chr19	55875788	-	hs|19q13.42	NM_000641	chr19:55875847-55875788	NM_000641	Hs.467304
A_33_P3262575	4.41384	2.14203	4.41384	up	BAI1-associated protein 2-like 1	BAIAP2L1	FALSE	Homo sapiens BAI1-associated protein 2-like 1 (BAIAP2L1), mRNA [NM_018842]	55971	GO:0017124|GO:0005886|GO:0005730|GO:2000251|GO:0003779|GO:0005634|GO:0015629|GO:0005829|GO:0007165|GO:0009617|GO:0005737|GO:0030838|GO:0046847|GO:0070064|GO:0008093|GO:0070062	97922626	chr7	97922567	-	hs|7q21.3	NM_018842	chr7:97922626-97922567	NM_018842	Hs.656063
A_32_P68148	4.41364	2.14197	4.41364	up	zinc finger protein 738	ZNF738	FALSE	Homo sapiens zinc finger protein 738 (ZNF738), non-coding RNA [NR_027130]	148203	GO:0000209|GO:0006355|GO:0004842|GO:0005634|GO:0003677|GO:0006351	21567182	chr19	21567123	+	hs|19p12	NR_027130	chr19:21567123-21567182	NR_027130	Hs.124384
A_33_P3216192	4.41153	2.14128	4.41153	up			FALSE				64035027	chr14	64034968	+	hs|14q23.2		chr14:064034968-064035027
A_23_P9340	4.40809	2.14016	4.40809	up	BarH-like homeobox 1	BARHL1	FALSE	Homo sapiens BarH-like homeobox 1 (BARHL1), mRNA [NM_020064]	56751	GO:0043565|GO:0043524|GO:0001077|GO:0045944|GO:0007605|GO:0030901|GO:0005634|GO:0001764|GO:0006351	135465474	chr9	135465415	+	hs|9q34.13	NM_020064	chr9:135465415-135465474	NM_020064	Hs.283809
A_33_P3659876	4.40754	2.13997	4.40754	up	non-SMC condensin II complex, subunit G2	NCAPG2	FALSE	Homo sapiens non-SMC condensin II complex, subunit G2 (NCAPG2), transcript variant 2, mRNA [NM_001281932]	54892	GO:0005515|GO:0007067|GO:0030261|GO:0001833|GO:0005730|GO:0005654|GO:0005634|GO:0035064|GO:0000278	158437043	chr7	158436984	-	hs|7q36.3	NM_001281932	chr7:158437043-158436984	NM_001281932	Hs.18616
A_19_P00315627	4.40584	2.13942	4.40584	up	uncharacterized LOC101930053	LOC101930053	FALSE	PREDICTED: Homo sapiens uncharacterized LOC101930053 (LOC101930053), transcript variant X1, ncRNA [XR_428440]	101930053		2493139	chr9	2493080	-	hs|9p24.2	XR_428440	chr9:2493139-2493080	XR_428440	Hs.416043
A_24_P64918	4.40509	2.13917	4.40509	up	zinc finger and BTB domain containing 1	ZBTB1	FALSE	Homo sapiens zinc finger and BTB domain containing 1 (ZBTB1), transcript variant 2, mRNA [NM_014950]	22890	GO:2000176|GO:0033077|GO:0046982|GO:0048538|GO:0005634|GO:0000122|GO:0032825|GO:0002711|GO:0003677|GO:0046872|GO:0042803|GO:0016604|GO:0045087|GO:0030183|GO:0051260|GO:0005654|GO:0042789|GO:0045582	64990062	chr14	64990003	+	hs|14q23.3	NM_014950	chr14:64990003-64990062	NM_014950	Hs.605143
A_33_P3283350	4.39095	2.13453	4.39095	up			FALSE				3753844	chrX	3753785	+	hs|Xp22.33		chrX:003753785-003753844
A_19_P00319714	4.39023	2.1343	4.39023	up	deleted in lymphocytic leukemia 1 (non-protein coding)	DLEU1	FALSE	Homo sapiens deleted in lymphocytic leukemia 1 (non-protein coding) (DLEU1), transcript variant 1, long non-coding RNA [NR_109973]	10301		50681351	chr13	50681292	+	hs|13q14.2	NR_109973	chr13:50681292-50681351	NR_109973	Hs.591229
A_24_P19268	4.38274	2.13183	4.38274	up	zinc finger protein 714	ZNF714	FALSE	Homo sapiens zinc finger protein 714 (ZNF714), transcript variant 1, mRNA [NM_182515]	148206	GO:0006355|GO:0005634|GO:0003677|GO:0046872|GO:0006351	21300773	chr19	21300714	+	hs|19p12	NM_182515	chr19:21300714-21300773	NM_182515	Hs.729186
A_33_P3320538	4.38075	2.13118	4.38075	up	nucleoporin like 1	NUPL1	FALSE	nucleoporin like 1 [Source:HGNC Symbol;Acc:20261] [ENST00000463407]	9818	GO:0005515|GO:0007077|GO:0031965|GO:0005975|GO:0019221|GO:0044281|GO:0005635|GO:0015031|GO:0055085|GO:0010827|GO:0006913|GO:0008645|GO:0005487|GO:0015758|GO:0005643|GO:0016032|GO:0051028|GO:0000278	25910419	chr13	25910360	+	hs|13q12.13	AB007870	chr13:25910360-25910419
A_23_P2271	4.38025	2.13101	4.38025	up	parathyroid hormone-like hormone	PTHLH	FALSE	Homo sapiens parathyroid hormone-like hormone (PTHLH), transcript variant 1, mRNA [NM_198965]	5744	GO:0010468|GO:0008284|GO:0008285|GO:0030819|GO:0007267|GO:0005634|GO:0051428|GO:0005615|GO:0043433|GO:0005737|GO:0016485|GO:0060649|GO:0030855|GO:0043129|GO:0032331|GO:0007565|GO:0005794|GO:0048286|GO:0046058|GO:0005730|GO:0005576|GO:0060659|GO:0001958|GO:0001501|GO:0007492|GO:0005179|GO:0002076|GO:0008544|GO:0007189	28116401	chr12	28116342	-	hs|12p11.22	NM_198965	chr12:28116401-28116342	NM_198965	Hs.591159
A_23_P28042	4.37942	2.13074	4.37942	up	zinc finger protein 737	ZNF737	FALSE	Homo sapiens zinc finger protein 737 (ZNF737), mRNA [NM_001159293]	100129842	GO:0006355|GO:0005634|GO:0003677|GO:0046872|GO:0006351	20720785	chr19	20720770	-	hs|19p12	NM_001159293	chr19:20720785-20720770	NM_001159293	Hs.515696
A_24_P548866	4.37753	2.13012	4.37753	up	HIG1 hypoxia inducible domain family, member 1A	HIGD1A	FALSE	Homo sapiens HIG1 hypoxia inducible domain family, member 1A (HIGD1A), transcript variant 1, mRNA [NM_001099668]	25994	GO:0043234|GO:0043066|GO:0070469|GO:0006950|GO:0005743|GO:0016021|GO:0055114	42824462	chr3	42824403	-	hs|3p22.1	NM_001099668	chr3:42824462-42824403	NM_001099668	Hs.728813
A_33_P3390391	4.37641	2.12975	4.37641	up	glioma tumor suppressor candidate region gene 1	GLTSCR1	FALSE	Homo sapiens glioma tumor suppressor candidate region gene 1 (GLTSCR1), mRNA [NM_015711]	29998	GO:0005515	48206524	chr19	48206465	+	hs|19q13.33	NM_015711	chr19:48206465-48206524	NM_015711	Hs.97244
A_33_P3357530	4.37602	2.12962	4.37602	up	solute carrier family 12 (potassium/chloride transporter), member 7	SLC12A7	FALSE	Homo sapiens solute carrier family 12 (potassium/chloride transporter), member 7 (SLC12A7), mRNA [NM_006598]	10723	GO:0006821|GO:0019901|GO:0015379|GO:0005886|GO:0005887|GO:0006810|GO:0055085|GO:0006813|GO:0006884|GO:0006811	1050550	chr5	1050491	-	hs|5p15.33	NM_006598	chr5:1050550-1050491	NM_006598	Hs.172613
A_24_P124624	4.37591	2.12958	4.37591	up	oxidized low density lipoprotein (lectin-like) receptor 1	OLR1	FALSE	Homo sapiens oxidized low density lipoprotein (lectin-like) receptor 1 (OLR1), transcript variant 1, mRNA [NM_002543]	4973	GO:0042542|GO:0008219|GO:0005886|GO:0008015|GO:0005730|GO:0005634|GO:0050900|GO:0006898|GO:0043231|GO:0043235|GO:0005041|GO:0006954|GO:0016020|GO:0005887|GO:0007596|GO:0042157|GO:0006508|GO:0007159|GO:0030246|GO:0045121|GO:0070062	10311657	chr12	10311598	-	hs|12p13.2	NM_002543	chr12:10311657-10311598	NM_002543	Hs.412484
A_23_P110184	4.37542	2.12942	4.37542	up	methylsterol monooxygenase 1	MSMO1	FALSE	Homo sapiens methylsterol monooxygenase 1 (MSMO1), transcript variant 1, mRNA [NM_006745]	6307	GO:0006695|GO:0005886|GO:0005506|GO:0005783|GO:0006631|GO:0005789|GO:0006633|GO:0044281|GO:0016021|GO:0008202|GO:0000254|GO:0055114	166263249	chr4	166263190	+	hs|4q32.3	NM_006745	chr4:166263190-166263249	NM_006745	Hs.105269
A_23_P39931	4.37039	2.12776	4.37039	up	dysferlin	DYSF	FALSE	Homo sapiens dysferlin (DYSF), transcript variant 8, mRNA [NM_003494]	8291	GO:0005515|GO:0005886|GO:0005509|GO:0030315|GO:0006906|GO:0030027|GO:0005544|GO:0042383|GO:0005543|GO:0001778|GO:0016021|GO:0030659|GO:0070062	71906315	chr2	71906256	+	hs|2p13.2	NM_003494	chr2:71906256-71906315	NM_003494	Hs.252180
A_32_P125549	4.36615	2.12636	4.36615	up			FALSE				59261776	chr14	59261717	+	hs|14q23.1		chr14:059261717-059261776
A_23_P255714	4.36524	2.12606	4.36524	up	intraflagellar transport 74 homolog (Chlamydomonas)	IFT74	FALSE	Homo sapiens intraflagellar transport 74 homolog (Chlamydomonas) (IFT74), transcript variant 1, mRNA [NM_025103]	80173	GO:0042384|GO:0005929|GO:0005813|GO:0031514|GO:0045944|GO:0003682|GO:0048487|GO:0033630|GO:0030992|GO:0016023|GO:0005634|GO:0035735	27056455	chr9	27056396	+	hs|9p21.2	NM_025103	chr9:27056396-27056455	NM_025103	Hs.145402
A_24_P753161	4.36108	2.12468	4.36108	up	bone morphogenetic protein receptor, type II (serine/threonine kinase)	BMPR2	FALSE	Homo sapiens bone morphogenetic protein receptor, type II (serine/threonine kinase) (BMPR2), mRNA [NM_001204]	659	GO:0005515|GO:0030308|GO:0006366|GO:0044214|GO:0005615|GO:0001946|GO:0009925|GO:0002063|GO:0004702|GO:0042127|GO:0043025|GO:0007178|GO:0003085|GO:0023014|GO:0001707|GO:0030501|GO:0009986|GO:0048286|GO:0030509|GO:0032924|GO:0010595|GO:0007420|GO:0005887|GO:2000279|GO:0014916|GO:0005886|GO:0061298|GO:0009952|GO:0030425|GO:0046872|GO:0060836|GO:0016362|GO:0030513|GO:0005737|GO:0016324|GO:0019838|GO:…	203431581	chr2	203431522	+	hs|2q33.2	NM_001204	chr2:203431522-203431581	NM_001204	Hs.471119
A_19_P00317397	4.36039	2.12446	4.36039	up			FALSE				26298087	chr8	26298028	+	hs|8p21.2		chr8:026298028-026298087
A_23_P134237	4.35914	2.12404	4.35914	up	retinoic acid receptor responder (tazarotene induced) 2	RARRES2	FALSE	Homo sapiens retinoic acid receptor responder (tazarotene induced) 2 (RARRES2), mRNA [NM_002889]	5919	GO:0005515|GO:0005102|GO:0005576|GO:0048566|GO:0050994|GO:0001523|GO:0001701|GO:0031012|GO:2001275|GO:0006954|GO:0050921|GO:0006935|GO:0050873|GO:0001934|GO:0010759|GO:0045600|GO:0070062	150037260	chr7	150037201	-	hs|7q36.1	NM_002889	chr7:150037260-150037201	NM_002889	Hs.647064
A_24_P55295	4.35369	2.12224	4.35369	up	gap junction protein, alpha 1, 43kDa	GJA1	FALSE	Homo sapiens gap junction protein, alpha 1, 43kDa (GJA1), mRNA [NM_000165]	2697	GO:0005515|GO:0060044|GO:2000810|GO:0015075|GO:0034405|GO:0010232|GO:0005764|GO:0051259|GO:0007507|GO:0006936|GO:0034220|GO:0006810|GO:0051924|GO:0043123|GO:0071253|GO:0070062|GO:0005794|GO:0030165|GO:0005887|GO:0005789|GO:0086014|GO:0005921|GO:0005922|GO:0045121|GO:0010652|GO:0017124|GO:0045732|GO:0005886|GO:0007267|GO:0043434|GO:0005741|GO:0016264|GO:0007204|GO:0005916|GO:0014704|GO:0045907|GO:…	121770386	chr6	121770327	+	hs|6q22.31	NM_000165	chr6:121770327-121770386	NM_000165	Hs.74471
A_24_P303647	4.35217	2.12173	4.35217	up	chromosome 7 open reading frame 60	C7orf60	FALSE	Homo sapiens chromosome 7 open reading frame 60 (C7orf60), mRNA [NM_152556]	154743	GO:0031167|GO:0016433	112459482	chr7	112459423	-	hs|7q31.1	NM_152556	chr7:112459482-112459423	NM_152556	Hs.489734
A_33_P3235987	4.35163	2.12156	4.35163	up	protein (peptidylprolyl cis/trans isomerase) NIMA-interacting, 4 (parvulin)	PIN4	FALSE	Homo sapiens protein (peptidylprolyl cis/trans isomerase) NIMA-interacting, 4 (parvulin) (PIN4), transcript variant 1, mRNA [NM_006223]	5303	GO:0000413|GO:0006364|GO:0003755|GO:0005730|GO:0005819|GO:0005634|GO:0003677|GO:0005737|GO:0003690|GO:0006457|GO:0005759|GO:0003681|GO:0030684|GO:0070062	71416754	chrX	71416695	+	hs|Xq13.1	NM_006223	chrX:71416695-71416754	NM_006223	Hs.655623
A_33_P3342081	4.35123	2.12142	4.35123	up	PR domain containing 1, with ZNF domain	PRDM1	FALSE	Homo sapiens PR domain containing 1, with ZNF domain (PRDM1), transcript variant 1, mRNA [NM_001198]	639	GO:0005515|GO:0003700|GO:0042826|GO:0060707|GO:0045579|GO:0008168|GO:0001893|GO:0030889|GO:0005634|GO:0000122|GO:0007281|GO:0032259|GO:0046872|GO:0006351|GO:0043565|GO:0010628|GO:0005737|GO:0045165|GO:0031665|GO:0042462	106557721	chr6	106557662	+	hs|6q21	NM_001198	chr6:106557662-106557721	NM_001198	Hs.436023
A_24_P213354	4.349	2.12068	4.349	up			FALSE	RATASI amino acid starvation-induced protein {Rattus norvegicus} (exp=-1; wgp=0; cg=0), partial (85%) [THC2598763]			74765855	chr10	74765795	-	hs|10q22.1		chr10:074765855-074765795
A_23_P83939	4.34295	2.11868	4.34295	up	synapse associated protein 1	SYAP1	FALSE	Homo sapiens synapse associated protein 1 (SYAP1), transcript variant 1, mRNA [NM_032796]	94056	GO:0005737|GO:0005794|GO:0005730|GO:0005634	16778520	chrX	16778461	+	hs|Xp22.2	NM_032796	chrX:16778461-16778520	NM_032796	Hs.744256
A_33_P3304107	4.33886	2.11732	4.33886	up	kelch-like family member 28	KLHL28	FALSE	Homo sapiens kelch-like family member 28 (KLHL28), mRNA [NM_017658]	54813		45398109	chr14	45398050	-	hs|14q21.2	NM_017658	chr14:45398109-45398050	NM_017658	Hs.550906
A_33_P3322283	4.33103	2.11471	4.33103	up	5-azacytidine induced 2	AZI2	FALSE	Homo sapiens 5-azacytidine induced 2 (AZI2), transcript variant 4, mRNA [NM_001271650]	64343	GO:0005515|GO:0005737|GO:0007249	28364145	chr3	28364086	-	hs|3p24.1	NM_001271650	chr3:28364145-28364086	NM_001271650	Hs.706676
A_23_P57784	4.32603	2.11304	4.32603	up	claudin 1	CLDN1	FALSE	Homo sapiens claudin 1 (CLDN1), mRNA [NM_021101]	9076	GO:0005515|GO:0061436|GO:0016328|GO:0045216|GO:0042802|GO:0016324|GO:0016338|GO:0005198|GO:0005887|GO:0016032|GO:0005923|GO:0016021|GO:0007155	190024060	chr3	190024001	-	hs|3q28	NM_021101	chr3:190024060-190024001	NM_021101	Hs.439060
A_23_P411851	4.32346	2.11219	4.32346	up	spectrin repeat containing, nuclear envelope family member 3	SYNE3	FALSE	Homo sapiens spectrin repeat containing, nuclear envelope family member 3 (SYNE3), mRNA [NM_152592]	161176	GO:0005791|GO:0005640|GO:0005515|GO:0051015|GO:0090150|GO:0008360|GO:0007010|GO:0034993|GO:0090286|GO:0016021|GO:0005635	95884017	chr14	95883958	-	hs|14q32.13	NM_152592	chr14:95884017-95883958	NM_152592	Hs.354645
A_24_P542375	4.32179	2.11163	4.32179	up	prothymosin, alpha	PTMA	FALSE	Homo sapiens prothymosin, alpha (PTMA), transcript variant 2, mRNA [NM_002823]	5757	GO:0005634|GO:0006351|GO:0070062	232578132	chr2	232578073	+	hs|2q37.1	NM_002823	chr2:232578073-232578132	NM_002823	Hs.459927
A_23_P1029	4.31647	2.10985	4.31647	up	microfibrillar-associated protein 2	MFAP2	FALSE	Homo sapiens microfibrillar-associated protein 2 (MFAP2), transcript variant 1, mRNA [NM_017459]	4237	GO:0030198|GO:0001527|GO:0005576|GO:0001968|GO:0070051|GO:0030220	17302197	chr1	17302138	-	hs|1p36.13	NM_017459	chr1:17302197-17302138	NM_017459	Hs.389137
A_23_P168240	4.31331	2.1088	4.31331	up	pre-mRNA processing factor 4B	PRPF4B	FALSE	Homo sapiens pre-mRNA processing factor 4B (PRPF4B), mRNA [NM_003913]	8899	GO:0008380|GO:0005515|GO:0004672|GO:0005694|GO:0004674|GO:0000398|GO:0005730|GO:0006468|GO:0005634|GO:0071013|GO:0005524	4058989	chr6	4057390	+	hs|6p25.2	NM_003913	chr6:4057390-4058989	NM_003913	Hs.159014
A_33_P3362567	4.30376	2.1056	4.30376	up			FALSE				203065870	chr2	203065811	-	hs|2q33.1		chr2:203065870-203065811
A_23_P91850	4.30374	2.10559	4.30374	up	interleukin 20 receptor beta	IL20RB	FALSE	Homo sapiens interleukin 20 receptor beta (IL20RB), mRNA [NM_144717]	53833	GO:0032703|GO:0002437|GO:0032753|GO:0048873|GO:0042015|GO:0032733|GO:0002765|GO:0001808|GO:0016021|GO:0032689|GO:0042130	136729857	chr3	136729798	+	hs|3q22.3	NM_144717	chr3:136729798-136729857	NM_144717	Hs.61232
A_33_P3342992	4.29981	2.10427	4.29981	up	ubiquitin-conjugating enzyme E2Q family member 2 pseudogene 2	UBE2Q2P2	FALSE	Homo sapiens ubiquitin-conjugating enzyme E2Q family member 2 pseudogene 2 (UBE2Q2P2), non-coding RNA [NR_004847]	100134869		82707684	chr15	82707625	+	hs|15q25.2	NR_004847	chr15:82707625-82707684	NR_004847	Hs.735222
A_23_P218068	4.29933	2.10411	4.29933	up	pleckstrin homology domain containing, family A member 5	PLEKHA5	FALSE	Homo sapiens pleckstrin homology domain containing, family A member 5 (PLEKHA5), transcript variant 1, mRNA [NM_019012]	54477	GO:0005515|GO:0008150|GO:0005545|GO:0005737|GO:0005575	19529165	chr12	19529106	+	hs|12p12.3	NM_019012	chr12:19529106-19529165	NM_019012	Hs.188614
A_33_P3390873	4.2975	2.1035	4.2975	up			FALSE				13005636	chr19	13005577	+	hs|19p13.2		chr19:013005577-013005636
A_23_P216579	4.29307	2.10201	4.29307	up	paralemmin 2	PALM2	FALSE	Homo sapiens paralemmin 2 (PALM2), transcript variant 1, mRNA [NM_053016]	114299	GO:0005886|GO:0008360	112705536	chr9	112705477	+	hs|9q31.3	NM_053016	chr9:112705477-112705536	NM_053016	Hs.591908
A_24_P22079	4.29297	2.10198	4.29297	up	forkhead box O1	FOXO1	FALSE	Homo sapiens forkhead box O1 (FOXO1), mRNA [NM_002015]	2308	GO:0005515|GO:0007389|GO:0001659|GO:0071732|GO:0045599|GO:0035947|GO:0007173|GO:0042127|GO:0009888|GO:0045444|GO:0031625|GO:0032869|GO:0008301|GO:0000122|GO:0008543|GO:0045087|GO:0005654|GO:0045893|GO:0045892|GO:0038095|GO:0010508|GO:0008286|GO:0045732|GO:0001678|GO:0005634|GO:0032873|GO:0005829|GO:0005739|GO:0005737|GO:0045944|GO:0051721|GO:0006473|GO:0009267|GO:0043066|GO:0048011|GO:0001568|GO:…	41130768	chr13	41130709	-	hs|13q14.11	NM_002015	chr13:41130768-41130709	NM_002015	Hs.370666
A_19_P00320471	4.28138	2.09808	4.28138	up	VLDLR antisense RNA 1	VLDLR-AS1	FALSE	Homo sapiens VLDLR antisense RNA 1 (VLDLR-AS1), long non-coding RNA [NR_015375]	401491		2535906	chr9	2535847	-	hs|9p24.2	NR_015375	chr9:2535906-2535847	NR_015375	Hs.416043
A_19_P00317565	4.28011	2.09765	4.28011	up			FALSE				2434721	chr6	2434662	-	hs|6p25.2		chr6:002434721-002434662
A_24_P187799	4.27901	2.09728	4.27901	up	cadherin-like and PC-esterase domain containing 1	CPED1	FALSE	Homo sapiens cadherin-like and PC-esterase domain containing 1 (CPED1), transcript variant 1, mRNA [NM_024913]	79974	GO:0005783	120768526	chr7	120768467	+	hs|7q31.31	NM_024913	chr7:120768467-120768526	NM_024913	Hs.189652
A_33_P3388815	4.27055	2.09442	4.27055	up	fucose-1-phosphate guanylyltransferase	FPGT	FALSE	Homo sapiens fucose-1-phosphate guanylyltransferase (FPGT), transcript variant 1, mRNA [NM_003838]	8790	GO:0005737|GO:0047341|GO:0006004|GO:0005525|GO:0003824	74671197	chr1	74671138	+	hs|1p31.1	NM_003838	chr1:74671138-74671197	NM_003838	Hs.480085
A_33_P3324383	4.26794	2.09354	4.26794	up	fidgetin-like 2	FIGNL2	FALSE	Homo sapiens fidgetin-like 2 (FIGNL2), mRNA [NM_001013690]	401720	GO:0017111|GO:0008152|GO:0005524	52211752	chr12	52211693	-	hs|12q13.13	NM_001013690	chr12:52211752-52211693	NM_001013690	Hs.648218
A_24_P126741	4.26197	2.09152	4.26197	up			FALSE				161178628	chr5	161178569	-	hs|5q34		chr5:161178628-161178569
A_33_P3302428	4.2618	2.09146	4.2618	up	trinucleotide repeat containing 6C	TNRC6C	FALSE	Homo sapiens trinucleotide repeat containing 6C (TNRC6C), transcript variant 1, mRNA [NM_001142640]	57690	GO:0005515|GO:0010467|GO:0048011|GO:0003723|GO:0048015|GO:0060213|GO:0005829|GO:0035278|GO:0000166|GO:0007173|GO:0007219|GO:1900153|GO:0008543|GO:0045087|GO:0038095	76101733	chr17	76101674	+	hs|17q25.3	NM_001142640	chr17:76101674-76101733	NM_001142640	Hs.569831
A_24_P68819	4.2569	2.0898	4.2569	up	protein phosphatase 1, regulatory subunit 21	PPP1R21	FALSE	Homo sapiens protein phosphatase 1, regulatory subunit 21 (PPP1R21), transcript variant 2, mRNA [NM_152994]	129285	GO:0019902	48738600	chr2	48738541	+	hs|2p16.3	NM_152994	chr2:48738541-48738600	NM_152994	Hs.654619
A_23_P87013	4.25333	2.08859	4.25333	up	transgelin	TAGLN	FALSE	Homo sapiens transgelin (TAGLN), transcript variant 1, mRNA [NM_001001522]	6876	GO:0005515|GO:0005737|GO:0007517|GO:0030855|GO:0003779	117074963	chr11	117074574	+	hs|11q23.3	NM_001001522	chr11:117074574-117074963	NM_001001522	Hs.410977
A_24_P272548	4.25277	2.0884	4.25277	up	family with sequence similarity 185, member A	FAM185A	FALSE	family with sequence similarity 185, member A [Source:HGNC Symbol;Acc:22412] [ENST00000496790]	222234		102395722	chr7	102395663	+	hs|7q22.1		chr7:102395663-102395722
A_33_P3327140	4.25162	2.08801	4.25162	up			FALSE				76531959	chr1	76531900	+	hs|1p31.1		chr1:076531900-076531959
A_24_P240187	4.25157	2.08799	4.25157	up	leucine rich repeat neuronal 1	LRRN1	FALSE	Homo sapiens leucine rich repeat neuronal 1 (LRRN1), mRNA [NM_020873]	57633	GO:0016021	3888812	chr3	3888753	+	hs|3p26.2	NM_020873	chr3:3888753-3888812	NM_020873	Hs.163244
A_33_P3474250	4.24627	2.08619	4.24627	up	uncharacterized LOC283270	LOC283270	FALSE	Homo sapiens cDNA FLJ33733 fis, clone BRAWH2018267. [AK091052]	283270		35839145	chr11	35839086	+	hs|11p13	AK091052	chr11:35839086-35839145		Hs.629770
A_33_P3419945	4.2452	2.08583	4.2452	up			FALSE	Homo sapiens cDNA FLJ27214 fis, clone SYN03752. [AK130724]			75836950	chr15	75836891	-	hs|15q24.2	AK130724	chr15:75836950-75836891
A_23_P200138	4.24304	2.0851	4.24304	up	SLAM family member 8	SLAMF8	FALSE	Homo sapiens SLAM family member 8 (SLAMF8), mRNA [NM_020125]	56833	GO:0004872|GO:0033860|GO:0016021|GO:0090383|GO:0035690|GO:0043549|GO:0042742	159807039	chr1	159806980	+	hs|1q23.2	NM_020125	chr1:159806980-159807039	NM_020125	Hs.438683
A_32_P161033	4.24265	2.08497	4.24265	up			FALSE	Homo sapiens, clone IMAGE:6155889, mRNA. [BC043411]			143403702	chr1	143403643	+	hs|1q21.1	BC043411	chr1:143403643-143403702		Hs.446446
A_19_P00326930	4.24191	2.08471	4.24191	up			FALSE				111810027	chr6	111809968	-	hs|6q21		chr6:111810027-111809968
A_23_P373724	4.23608	2.08273	4.23608	up	PTPRF interacting protein, binding protein 1 (liprin beta 1)	PPFIBP1	FALSE	Homo sapiens PTPRF interacting protein, binding protein 1 (liprin beta 1) (PPFIBP1), transcript variant 1, mRNA [NM_003622]	8496	GO:0005886|GO:0007155	27848412	chr12	27848353	+	hs|12p11.22	NM_003622	chr12:27848353-27848412	NM_003622	Hs.172445
A_23_P157914	4.23554	2.08255	4.23554	up	MAM domain containing 2	MAMDC2	FALSE	Homo sapiens MAM domain containing 2 (MAMDC2), mRNA [NM_153267]	256691	GO:0019800|GO:0016020|GO:0005783|GO:0005539|GO:0005614	72840711	chr9	72833499	+	hs|9q21.12	NM_153267	chr9:72833499-72840711	NM_153267	Hs.547172
A_19_P00328003	4.23254	2.08152	4.23254	up			FALSE				1430596	chr16	1430537	-	hs|16p13.3		chr16:001430596-001430537
A_23_P110266	4.23036	2.08078	4.23036	up	neuron-derived neurotrophic factor	NDNF	FALSE	Homo sapiens neuron-derived neurotrophic factor (NDNF), mRNA [NM_024574]	79625	GO:0031012|GO:0019800|GO:0043524|GO:0030198|GO:0010976|GO:0010811|GO:0016049|GO:0005576|GO:0005539|GO:0001764|GO:0008201	121957475	chr4	121957416	-	hs|4q27	NM_024574	chr4:121957475-121957416	NM_024574	Hs.709520
A_19_P00325695	4.22202	2.07793	4.22202	up	protein phosphatase 1, regulatory subunit 3E	PPP1R3E	FALSE	protein phosphatase 1, regulatory subunit 3E [Source:HGNC Symbol;Acc:14943] [ENST00000452015]	90673	GO:0005977	23765051	chr14	23764992	-	hs|14q11.2		chr14:23765051-23764992
A_33_P3213557	4.22088	2.07754	4.22088	up	CCZ1 vacuolar protein trafficking and biogenesis associated homolog (S. cerevisiae)	CCZ1	FALSE	Homo sapiens CCZ1 vacuolar protein trafficking and biogenesis associated homolog (S. cerevisiae) (CCZ1), mRNA [NM_015622]	51622	GO:0005765	5940562	chr7	5940501	+	hs|7p22.1	NM_015622	chr7:5940501-5940562	NM_015622	Hs.530000
A_33_P3258627	4.2187	2.0768	4.2187	up			FALSE				238330122	chr2	238330063	-	hs|2q37.3		chr2:238330122-238330063
A_24_P199251	4.21669	2.07611	4.21669	up	Ras association (RalGDS/AF-6) domain family (N-terminal) member 9	RASSF9	FALSE	Homo sapiens Ras association (RalGDS/AF-6) domain family (N-terminal) member 9 (RASSF9), mRNA [NM_005447]	9182	GO:0005515|GO:0007165|GO:0005215|GO:0016197|GO:0006605|GO:0012510|GO:0005829|GO:0005768	86198859	chr12	86198800	-	hs|12q21.31	NM_005447	chr12:86198859-86198800	NM_005447	Hs.527881
A_23_P309837	4.21394	2.07517	4.21394	up	stonin 2	STON2	FALSE	Homo sapiens stonin 2 (STON2), transcript variant 1, mRNA [NM_033104]	85439	GO:0005515|GO:0043005|GO:0030131|GO:0005737|GO:0030054|GO:0030100|GO:0005730|GO:0048488|GO:0006886|GO:0008021	81743393	chr14	81743334	-	hs|14q31.1	NM_033104	chr14:81743393-81743334	NM_033104	Hs.14248
A_33_P3615922	4.21063	2.07404	4.21063	up	chromosome 7 open reading frame 63	C7orf63	FALSE	Homo sapiens chromosome 7 open reading frame 63 (C7orf63), transcript variant 1, mRNA [NM_001039706]	79846		89929345	chr7	89929286	+	hs|7q21.13	NM_001039706	chr7:89929286-89929345	NM_001039706	Hs.657403
A_33_P3271885	4.20796	2.07312	4.20796	up			FALSE				19671261	chrY	19671202	-	hs|Yq11.221		chrY:019671261-019671202
A_24_P187056	4.20622	2.07253	4.20622	up	ankyrin repeat domain 20 family, member A12, pseudogene	ANKRD20A12P	FALSE	Homo sapiens ankyrin repeat domain 20 family, member A12, pseudogene (ANKRD20A12P), non-coding RNA [NR_046228]	100874392		142711308	chr1	142700309	-	hs|1q21.1	NR_046228	chr1:142711308-142700309	NR_046228	Hs.648245
A_24_P341731	4.20457	2.07196	4.20457	up			FALSE				31552562	chr22	31552503	-	hs|22q12.2		chr22:031552562-031552503
A_24_P566701	4.20404	2.07178	4.20404	up	S-phase kinase-associated protein 1	SKP1	FALSE	Homo sapiens S-phase kinase-associated protein 1 (SKP1), transcript variant 2, mRNA [NM_170679]	6500	GO:0031519|GO:0005515|GO:0035518|GO:0004842|GO:0016567|GO:0051437|GO:0031146|GO:0031145|GO:0051439|GO:0005829|GO:0000082|GO:0007219|GO:0000086|GO:0016032|GO:0005654|GO:0031467|GO:0000278|GO:0019005|GO:0070062	133509660	chr5	133502919	-	hs|5q31.1	NM_170679	chr5:133509660-133502919	NM_170679	Hs.171626
A_23_P107775	4.20108	2.07076	4.20108	up	transmembrane protein 190	TMEM190	FALSE	Homo sapiens transmembrane protein 190 (TMEM190), mRNA [NM_139172]	147744	GO:0002079|GO:0005634|GO:0016021|GO:0043621	55889425	chr19	55889366	+	hs|19q13.42	NM_139172	chr19:55889366-55889425	NM_139172	Hs.590943
A_33_P3418576	4.198	2.0697	4.198	up	serine active site containing 1	SERAC1	FALSE	Homo sapiens serine active site containing 1 (SERAC1), transcript variant 2, long non-coding RNA [NR_073096]	84947	GO:0031012|GO:0005739|GO:0005737|GO:0030198|GO:0005783|GO:0016788|GO:0005730|GO:0005634|GO:0016021|GO:0008654|GO:0006886|GO:0006505	158535843	chr6	158535784	-	hs|6q25.3	NR_073096	chr6:158535843-158535784	NR_073096	Hs.154706
A_33_P3336484	4.19571	2.06892	4.19571	up	nuclear pore complex interacting protein family, member A5	NPIPA5	FALSE	Homo sapiens nuclear pore complex interacting protein family, member A5 (NPIPA5), mRNA [NM_001277325]	100288332		15460570	chr16	15460511	-	hs|16p13.11	NM_001277325	chr16:15460570-15460511	NM_001277325	Hs.676266
A_23_P122724	4.19217	2.0677	4.19217	up	vanin 2	VNN2	FALSE	Homo sapiens vanin 2 (VNN2), transcript variant 1, mRNA [NM_004665]	8875	GO:0017159|GO:0015939|GO:0005886|GO:0006928|GO:0031225	133065225	chr6	133065166	-	hs|6q23.2	NM_004665	chr6:133065225-133065166	NM_004665	Hs.293130
A_24_P56388	4.19162	2.06751	4.19162	up	hypoxia inducible factor 1, alpha subunit (basic helix-loop-helix transcription factor)	HIF1A	FALSE	Homo sapiens hypoxia inducible factor 1, alpha subunit (basic helix-loop-helix transcription factor) (HIF1A), transcript variant 2, mRNA [NM_181054]	3091	GO:0042541|GO:0005515|GO:0010468|GO:0003700|GO:0003705|GO:0001755|GO:0000989|GO:0001947|GO:0006879|GO:0043524|GO:0007219|GO:0042789|GO:0031625|GO:0035035|GO:0006089|GO:0019901|GO:0014850|GO:0001892|GO:0032722|GO:0030502|GO:0008542|GO:0032963|GO:0019896|GO:0005654|GO:0019899|GO:0032364|GO:0008134|GO:0030949|GO:0032007|GO:0021987|GO:0042826|GO:0035257|GO:0005634|GO:0001837|GO:0010870|GO:0005829|GO:…	62214904	chr14	62214845	+	hs|14q23.2	NM_181054	chr14:62214845-62214904	NM_181054	Hs.597216
A_32_P119569	4.17992	2.06348	4.17992	up	golgin A8 family, member E, pseudogene	GOLGA8EP	FALSE	Homo sapiens golgin A8 family, member E, pseudogene (GOLGA8EP), non-coding RNA [NR_033350]	390535		23438849	chr15	23437935	+	hs|15q11.2	NR_033350	chr15:23437935-23438849	NR_033350	Hs.454647
A_33_P3350232	4.17934	2.06327	4.17934	up			FALSE	Homo sapiens cDNA FLJ45928 fis, clone PLACE6019674. [AK127825]			76961394	chr14	76961335	-	hs|14q24.3	AK127825	chr14:76961394-76961335		Hs.686950
A_19_P00318167	4.17065	2.06027	4.17065	up			FALSE	Homo sapiens mRNA; cDNA DKFZp564G222 (from clone DKFZp564G222) [AL049991]			130756410	chr7	130756351	-	hs|7q32.3	AL049991	chr7:130756410-130756351		Hs.671957
A_32_P36694	4.1695	2.05987	4.1695	up	JAZF zinc finger 1	JAZF1	FALSE	Homo sapiens JAZF zinc finger 1 (JAZF1), mRNA [NM_175061]	221895	GO:0017053|GO:0003714|GO:0005634|GO:0000122|GO:0003676|GO:0046872|GO:0006351	27870436	chr7	27870377	-	hs|7p15.2	NM_175061	chr7:27870436-27870377	NM_175061	Hs.368944
A_24_P80135	4.16445	2.05813	4.16445	up	protein tyrosine phosphatase, non-receptor type 18 (brain-derived)	PTPN18	FALSE	Homo sapiens protein tyrosine phosphatase, non-receptor type 18 (brain-derived) (PTPN18), transcript variant 1, mRNA [NM_014369]	26469	GO:0005515|GO:0005737|GO:0006470|GO:0005634|GO:0035335|GO:0004726	131132140	chr2	131132081	+	hs|2q21.1	NM_014369	chr2:131132081-131132140	NM_014369	Hs.744861
A_24_P275073	4.16112	2.05697	4.16112	up	ADAM metallopeptidase with thrombospondin type 1 motif, 14	ADAMTS14	FALSE	Homo sapiens ADAM metallopeptidase with thrombospondin type 1 motif, 14 (ADAMTS14), transcript variant 1, mRNA [NM_139155]	140766	GO:0030198|GO:0030199|GO:0030574|GO:0006508|GO:0005578|GO:0008270|GO:0005576|GO:0004222	72522191	chr10	72522132	+	hs|10q22.1	NM_139155	chr10:72522132-72522191	NM_139155	Hs.352156
A_19_P00325462	4.15889	2.0562	4.15889	up			FALSE				60686891	chr5	60686832	-	hs|5q12.1		chr5:060686891-060686832
A_23_P395566	4.15605	2.05521	4.15605	up	F-box protein 31	FBXO31	FALSE	Homo sapiens F-box protein 31 (FBXO31), transcript variant 1, mRNA [NM_024735]	79791	GO:0008054|GO:0016567|GO:0030332|GO:0031571|GO:0031146|GO:0019005|GO:0006974	87363104	chr16	87363045	-	hs|16q24.2	NM_024735	chr16:87363104-87363045	NM_024735	Hs.567582
A_33_P3364263	4.14958	2.05297	4.14958	up	limb bud and heart development	LBH	FALSE	Homo sapiens limb bud and heart development (LBH), mRNA [NM_030915]	81606	GO:0010468|GO:0005737|GO:0030193|GO:0007275|GO:0005634|GO:0045893|GO:0006351	30480506	chr2	30480447	+	hs|2p23.1	NM_030915	chr2:30480447-30480506	NM_030915	Hs.567598
A_33_P3306327	4.14712	2.05211	4.14712	up			FALSE				139464035	chr9	139463976	+	hs|9q34.3		chr9:139463976-139464035
A_23_P164057	4.14464	2.05125	4.14464	up	microfibrillar-associated protein 4	MFAP4	FALSE	Homo sapiens microfibrillar-associated protein 4 (MFAP4), transcript variant 2, mRNA [NM_002404]	4239	GO:0005515|GO:0009650|GO:0010712|GO:0001527|GO:0005576|GO:0071953|GO:0071493|GO:0031012|GO:0003674|GO:0030198|GO:0043206|GO:0007155|GO:0048251|GO:0070062	19286872	chr17	19286813	-	hs|17p11.2	NM_002404	chr17:19286872-19286813	NM_002404	Hs.296049
A_33_P3629678	4.13738	2.04872	4.13738	up	collagen, type V, alpha 1	COL5A1	FALSE	Homo sapiens collagen, type V, alpha 1 (COL5A1), transcript variant 1, mRNA [NM_000093]	1289	GO:0035313|GO:0048592|GO:0005588|GO:0035989|GO:0046872|GO:0022617|GO:0007411|GO:0030198|GO:0030199|GO:0030574|GO:0045112|GO:0043206|GO:0007155|GO:0008201|GO:0070062|GO:0001568|GO:0048407|GO:0043394|GO:0005576|GO:0005604|GO:0031012|GO:0003007|GO:0005178|GO:0016477|GO:0051128|GO:0005788|GO:0043588|GO:0032964|GO:0005201	137736386	chr9	137736327	+	hs|9q34.3	NM_000093	chr9:137736327-137736386	NM_000093	Hs.210283
A_33_P3309526	4.12851	2.04562	4.12851	up	protein tyrosine phosphatase, receptor type, C	PTPRC	FALSE	Homo sapiens protein tyrosine phosphatase, receptor type, C (PTPRC), transcript variant 1, mRNA [NM_002838]	5788	GO:0050853|GO:0005515|GO:0050852|GO:0050857|GO:0005886|GO:0030890|GO:0048539|GO:0048864|GO:0035335|GO:0002378|GO:0051607|GO:0006470|GO:0001960|GO:0005001|GO:0002244|GO:0007411|GO:0042100|GO:0006933|GO:0042102|GO:0045860|GO:0051726|GO:0004725|GO:0070062|GO:0051209|GO:0019901|GO:2000648|GO:0030217|GO:0005887|GO:0016311|GO:0001915|GO:0045121|GO:0006469|GO:2000473|GO:0005925|GO:0007166|GO:0009897	198725600	chr1	198725541	+	hs|1q32.1	NM_002838	chr1:198725541-198725600	NM_002838	Hs.654514
A_24_P81841	4.12611	2.04478	4.12611	up	cyclin-dependent kinase inhibitor 1B (p27, Kip1)	CDKN1B	FALSE	Homo sapiens cyclin-dependent kinase inhibitor 1B (p27, Kip1) (CDKN1B), mRNA [NM_004064]	1027	GO:0005515|GO:0030308|GO:0007605|GO:0032403|GO:0007173|GO:0010942|GO:0032355|GO:0006977|GO:0071285|GO:0048839|GO:0019903|GO:0008656|GO:0005072|GO:0043234|GO:0008543|GO:0045930|GO:0045087|GO:0030544|GO:0005654|GO:0000278|GO:0045892|GO:0038095|GO:0046686|GO:0060770|GO:0008284|GO:0045732|GO:0048102|GO:0008285|GO:0045736|GO:0051087|GO:0043434|GO:0005634|GO:0000079|GO:0005829|GO:0000082|GO:0005737|GO:…	12874999	chr12	12874940	+	hs|12p13.1	NM_004064	chr12:12874940-12874999	NM_004064	Hs.238990
A_23_P420269	4.12322	2.04377	4.12322	up	integrator complex subunit 2	INTS2	FALSE	Homo sapiens integrator complex subunit 2 (INTS2), transcript variant 1, mRNA [NM_020748]	57508	GO:0005622|GO:0005515|GO:0031965|GO:0032039|GO:0016021|GO:0016180	59943270	chr17	59943211	-	hs|17q23.2	NM_020748	chr17:59943270-59943211	NM_020748	Hs.279646
A_33_P3237634	4.12159	2.0432	4.12159	up	TSC22 domain family, member 3	TSC22D3	FALSE	Homo sapiens TSC22 domain family, member 3 (TSC22D3), transcript variant 2, mRNA [NM_004089]	1831	GO:0007589|GO:0006355|GO:0034220|GO:0003700|GO:0070236|GO:0043426|GO:0006970|GO:0005634|GO:0000122|GO:0048642|GO:0055085|GO:0005829	106956545	chrX	106956486	-	hs|Xq22.3	NM_004089	chrX:106956545-106956486	NM_004089	Hs.522074
A_19_P00804212	4.12085	2.04294	4.12085	up	NFU1 iron-sulfur cluster scaffold homolog (S. cerevisiae)	NFU1	FALSE	Homo sapiens NFU1 iron-sulfur cluster scaffold homolog (S. cerevisiae) (NFU1), transcript variant 1, mRNA [NM_015700]	27247	GO:0005739|GO:0005515|GO:0051539|GO:0016226|GO:0005506|GO:0005634|GO:0005829	69623272	chr2	69623245	-	hs|2p13.3	NM_015700	chr2:69623272-69623245	NM_015700	Hs.430439
A_23_P345118	4.12038	2.04278	4.12038	up	pim-1 oncogene	PIM1	FALSE	Homo sapiens pim-1 oncogene (PIM1), transcript variant 1, mRNA [NM_002648]	5292	GO:0005515|GO:0043066|GO:0030145|GO:0005886|GO:0008283|GO:0006915|GO:0005634|GO:0007275|GO:0005524|GO:0043433|GO:0031659|GO:0005737|GO:0007049|GO:0046777|GO:0004674|GO:0030212|GO:0006468|GO:0043024|GO:0008134	37143161	chr6	37143102	+	hs|6p21.2	NM_002648	chr6:37143102-37143161	NM_002648	Hs.81170
A_33_P3333523	4.12032	2.04276	4.12032	up			FALSE				120691788	chr10	120691729	-	hs|10q26.11		chr10:120691788-120691729
A_19_P00806605	4.12026	2.04274	4.12026	up			FALSE				46953774	chr12	46953715	+	hs|12q13.11		chr12:046953715-046953774
A_19_P00315755	4.11544	2.04105	4.11544	up	v-rel avian reticuloendotheliosis viral oncogene homolog	REL	FALSE	v-rel avian reticuloendotheliosis viral oncogene homolog [Source:HGNC Symbol;Acc:9954] [ENST00000295025]	5966	GO:0005515|GO:0005667|GO:0003700|GO:0007249|GO:0001205|GO:0001816|GO:0006351|GO:0005829|GO:0045084|GO:0045944|GO:0000980|GO:0005654|GO:0043123	61158574	chr2	61158515	+	hs|2p16.1		chr2:61158515-61158574
A_19_P00316109	4.11187	2.03979	4.11187	up	long intergenic non-protein coding RNA 313	LINC00313	FALSE	long intergenic non-protein coding RNA 313 [Source:HGNC Symbol;Acc:16416] [ENST00000427188]	114038		44890372	chr21	44890313	-	hs|21q22.3	XR_425284	chr21:44890372-44890313	XR_425284	Hs.592161
A_23_P27229	4.10988	2.0391	4.10988	up	myosin XVA	MYO15A	FALSE	Homo sapiens myosin XVA (MYO15A), mRNA [NM_016239]	51168	GO:0005516|GO:0005737|GO:0003774|GO:0042472|GO:0007605|GO:0008152|GO:0032420|GO:0007626|GO:0003779|GO:0016459|GO:0005524|GO:0070062	18082958	chr17	18082899	+	hs|17p11.2	NM_016239	chr17:18082899-18082958	NM_016239	Hs.462390
A_23_P157527	4.10777	2.03836	4.10777	up	leucine rich repeat and coiled-coil centrosomal protein 1	LRRCC1	FALSE	Homo sapiens leucine rich repeat and coiled-coil centrosomal protein 1 (LRRCC1), mRNA [NM_033402]	85444	GO:0007067|GO:0005813|GO:0005737|GO:0005814|GO:0005730|GO:0005634	86057787	chr8	86057728	+	hs|8q21.2	NM_033402	chr8:86057728-86057787	NM_033402	Hs.193115
A_19_P00802100	4.10489	2.03734	4.10489	up	cancer susceptibility candidate 15 (non-protein coding)	CASC15	FALSE	cancer susceptibility candidate 15 (non-protein coding) [Source:HGNC Symbol;Acc:28245] [ENST00000605917]	401237		22149600	chr6	22149541	+	hs|6p22.3		chr6:22149541-22149600
A_23_P253571	4.10174	2.03623	4.10174	up	PHD finger protein 5A	PHF5A	FALSE	Homo sapiens PHD finger protein 5A (PHF5A), mRNA [NM_032758]	84844	GO:0008380|GO:0010467|GO:0003700|GO:0016607|GO:0000398|GO:0005654|GO:0045893|GO:0003677|GO:0016363|GO:0006351|GO:0005689|GO:0005686	41856199	chr22	41856140	-	hs|22q13.2	NM_032758	chr22:41856199-41856140	NM_032758	Hs.474980
A_24_P945194	4.10059	2.03583	4.10059	up	programmed cell death 6 interacting protein	PDCD6IP	FALSE	Homo sapiens programmed cell death 6 interacting protein (PDCD6IP), transcript variant 1, mRNA [NM_013374]	10015	GO:0001772|GO:0005515|GO:0042470|GO:0017124|GO:0005815|GO:0019058|GO:0006915|GO:0015031|GO:0042803|GO:0005829|GO:0005737|GO:0007049|GO:0016032|GO:0070062|GO:0051301|GO:0048306	33910878	chr3	33910819	+	hs|3p22.3	NM_013374	chr3:33910819-33910878	NM_013374	Hs.475896
A_23_P160968	4.0967	2.03446	4.0967	up	laminin, gamma 2	LAMC2	FALSE	Homo sapiens laminin, gamma 2 (LAMC2), transcript variant 2, mRNA [NM_018891]	3918	GO:0048471|GO:0034329|GO:0005576|GO:0005607|GO:0005615|GO:0005610|GO:0008544|GO:0016020|GO:0022617|GO:0030198|GO:0031581|GO:0007155|GO:0005938|GO:0008201	183209453	chr1	183209301	+	hs|1q25.3	NM_018891	chr1:183209301-183209453	NM_018891	Hs.591484
A_33_P3409518	4.09361	2.03337	4.09361	up	tubulin, beta pseudogene 5	TUBBP5	FALSE	Homo sapiens tubulin, beta pseudogene 5 (TUBBP5), non-coding RNA [NR_027156]	643224		141071879	chr9	141071820	+	hs|9q34.3	NR_027156	chr9:141071820-141071879	NR_027156	Hs.551805
A_33_P3214204	4.08405	2.03	4.08405	up	triple QxxK/R motif containing	TRIQK	FALSE	Homo sapiens clone FLB3344 PRO0845 mRNA, complete cds. [AF130048]	286144	GO:0005789|GO:0016021	93898013	chr8	93897954	+	hs|8q22.1	AF130048	chr8:93897954-93898013		Hs.440643
A_24_P410587	4.07773	2.02777	4.07773	up	archaelysin family metallopeptidase 2 pseudogene 1	AMZ2P1	FALSE	Homo sapiens archaelysin family metallopeptidase 2 pseudogene 1 (AMZ2P1), non-coding RNA [NR_026903]	201283		62964429	chr17	62964370	-	hs|17q24.1	NR_026903	chr17:62964429-62964370	NR_026903	Hs.396447
A_24_P261383	4.0728	2.02602	4.0728	up	TATA box binding protein (TBP)-associated factor, RNA polymerase I, D, 41kDa	TAF1D	FALSE	Homo sapiens TATA box binding protein (TBP)-associated factor, RNA polymerase I, D, 41kDa (TAF1D), mRNA [NM_024116]	79101	GO:0005515|GO:0010467|GO:0006355|GO:0005815|GO:0006363|GO:0006362|GO:0005730|GO:0006361|GO:0006360|GO:0005654|GO:0005634|GO:0003677	93469411	chr11	93469352	-	hs|11q21	NM_024116	chr11:93469411-93469352	NM_024116	Hs.355750
A_23_P7732	4.07184	2.02568	4.07184	up	centrin, EF-hand protein, 3	CETN3	FALSE	Homo sapiens centrin, EF-hand protein, 3 (CETN3), mRNA [NM_004365]	1070	GO:0008017|GO:0007067|GO:0005813|GO:0005737|GO:0007098|GO:0005814|GO:0005509|GO:0032391|GO:0045111|GO:0031683	89695237	chr5	89695178	-	hs|5q14.3	NM_004365	chr5:89695237-89695178	NM_004365	Hs.591767
A_24_P268676	4.06663	2.02383	4.06663	up	basic helix-loop-helix family, member e40	BHLHE40	FALSE	Homo sapiens basic helix-loop-helix family, member e40 (BHLHE40), mRNA [NM_003670]	8553	GO:0001191|GO:0005515|GO:0001102|GO:0006355|GO:0003700|GO:0005794|GO:0046982|GO:0006366|GO:0000981|GO:0003705|GO:0003714|GO:0019904|GO:0043426|GO:0005730|GO:0043425|GO:0070888|GO:0005634|GO:0000122|GO:0043433|GO:0042803|GO:0032922|GO:0001078|GO:0045892|GO:0043153	5026319	chr3	5026260	+	hs|3p26.1	NM_003670	chr3:5026260-5026319	NM_003670	Hs.744856
A_24_P944427	4.0661	2.02365	4.0661	up	SET domain containing 5	SETD5	FALSE	Homo sapiens SET domain containing 5 (SETD5), transcript variant 2, mRNA [NM_001292043]	55209		9519348	chr3	9519289	+	hs|3p25.3	NM_001292043	chr3:9519289-9519348	NM_001292043	Hs.288164
A_33_P3325497	4.05398	2.01934	4.05398	up	fin bud initiation factor homolog (zebrafish)	FIBIN	FALSE	Homo sapiens fin bud initiation factor homolog (zebrafish) (FIBIN), mRNA [NM_203371]	387758	GO:0005794|GO:0005783|GO:0005576	27018558	chr11	27018499	+	hs|11p14.2	NM_203371	chr11:27018499-27018558	NM_203371	Hs.712718
A_24_P392230	4.05127	2.01837	4.05127	up			FALSE	HSL31 ribosomal protein L31 {Homo sapiens} (exp=-1; wgp=0; cg=0), complete [THC2539248]			121874842	chr7	121874783	+	hs|7q31.32		chr7:121874783-121874842
A_33_P3381666	4.048	2.01721	4.048	up	actin binding LIM protein family, member 2	ABLIM2	FALSE	Homo sapiens actin binding LIM protein family, member 2 (ABLIM2), transcript variant 7, mRNA [NM_001130088]	84448	GO:0030036|GO:0007411|GO:0045944|GO:0008270|GO:0003779|GO:0030016|GO:0015629|GO:0006351	8008822	chr4	8008763	-	hs|4p16.1	NM_001130088	chr4:8008822-8008763	NM_001130088	Hs.233404
A_23_P209449	4.03844	2.0138	4.03844	up	frizzled class receptor 7	FZD7	FALSE	Homo sapiens frizzled class receptor 7 (FZD7), mRNA [NM_003507]	8324	GO:0008406|GO:0005515|GO:0048103|GO:0017147|GO:0005886|GO:0071300|GO:0038031|GO:0007199|GO:0046330|GO:0010812|GO:0007409|GO:0042666|GO:0007223|GO:0035412|GO:0005109|GO:0005737|GO:0030182|GO:0034446|GO:0014834|GO:0060070|GO:0001944|GO:0060054|GO:0042813|GO:0006355|GO:0033077|GO:0004930|GO:0060231|GO:0045177|GO:0030165|GO:0032589|GO:0007420|GO:0019827|GO:0016021|GO:0045893|GO:0042327	202902989	chr2	202902930	+	hs|2q33.1	NM_003507	chr2:202902930-202902989	NM_003507	Hs.173859
A_33_P3387524	4.03532	2.01268	4.03532	up	DEP domain containing 1	DEPDC1	FALSE	Homo sapiens DEP domain containing 1 (DEPDC1), transcript variant 1, mRNA [NM_001114120]	55635	GO:0043547|GO:0035556|GO:0005515|GO:0017053|GO:0005634|GO:0045892|GO:0006351|GO:0005096	68941036	chr1	68940977	-	hs|1p31.2	NM_001114120	chr1:68941036-68940977	NM_001114120	Hs.445098
A_33_P3265920	4.03443	2.01237	4.03443	up	protein tyrosine phosphatase, non-receptor type 4 (megakaryocyte)	PTPN4	FALSE	Homo sapiens protein tyrosine phosphatase, non-receptor type 4 (megakaryocyte) (PTPN4), mRNA [NM_002830]	5775	GO:0008092|GO:0005515|GO:0005737|GO:0006470|GO:0009898|GO:0005856|GO:0035335|GO:0004726	120735036	chr2	120734977	+	hs|2q14.2	NM_002830	chr2:120734977-120735036	NM_002830	Hs.469809
A_23_P83298	4.03372	2.01211	4.03372	up	paired related homeobox 2	PRRX2	FALSE	Homo sapiens paired related homeobox 2 (PRRX2), mRNA [NM_016307]	51450	GO:0043565|GO:0045880|GO:0006355|GO:0042472|GO:0003700|GO:0051216|GO:0048844|GO:0042474|GO:0005634|GO:0002053|GO:0030326|GO:0048701	132484932	chr9	132484873	+	hs|9q34.11	NM_016307	chr9:132484873-132484932	NM_016307	Hs.660115
A_33_P3333712	4.02117	2.00761	4.02117	up	SCY1-like 2 (S. cerevisiae)	SCYL2	FALSE	Homo sapiens SCY1-like 2 (S. cerevisiae) (SCYL2), mRNA [NM_017988]	55681	GO:0005515|GO:0048471|GO:2000370|GO:0005794|GO:0008333|GO:0030136|GO:0005102|GO:0005524|GO:0004672|GO:0006468|GO:0090090|GO:0002092|GO:0010008|GO:2000286	100732950	chr12	100732441	+	hs|12q23.1	NM_017988	chr12:100732441-100732950	NM_017988	Hs.506481
A_23_P134755	4.01899	2.00683	4.01899	up	trichorhinophalangeal syndrome I	TRPS1	FALSE	Homo sapiens trichorhinophalangeal syndrome I (TRPS1), transcript variant 1, mRNA [NM_014112]	7227	GO:0005515|GO:0003700|GO:0006366|GO:0005634|GO:0032330|GO:0000122|GO:0006607|GO:0043565|GO:0001501|GO:0002062|GO:0031063|GO:0007178|GO:0008270	116421052	chr8	116420993	-	hs|8q23.3	NM_014112	chr8:116421052-116420993	NM_014112	Hs.657018
A_23_P111395	4.01093	2.00394	4.01093	up	solute carrier family 22 (organic cation transporter), member 2	SLC22A2	FALSE	Homo sapiens solute carrier family 22 (organic cation transporter), member 2 (SLC22A2), mRNA [NM_003058]	6582	GO:0007589|GO:0015220|GO:0005886|GO:0015695|GO:0015697|GO:0015871|GO:0007268|GO:0044281|GO:0051608|GO:0055085|GO:0015101|GO:0015651|GO:0007269|GO:0016323|GO:0034220|GO:0016020|GO:0005887|GO:0006855|GO:0042136|GO:0005496|GO:0070062	160638285	chr6	160638226	-	hs|6q25.3	NM_003058	chr6:160638285-160638226	NM_003058	Hs.436385
A_23_P30307	3.99774	1.99918	3.99774	up	mediator complex subunit 7	MED7	FALSE	Homo sapiens mediator complex subunit 7 (MED7), transcript variant 2, mRNA [NM_004270]	9443	GO:0005515|GO:0005667|GO:0010467|GO:0031965|GO:0001104|GO:0006367|GO:0006357|GO:0003713|GO:0005634|GO:0005739|GO:0016592|GO:0019827|GO:0005654	156565858	chr5	156565799	-	hs|5q33.3	NM_004270	chr5:156565858-156565799	NM_004270	Hs.744244
A_23_P88559	3.9975	1.9991	3.9975	up	lipase, hepatic	LIPC	FALSE	Homo sapiens lipase, hepatic (LIPC), mRNA [NM_000236]	3990	GO:0042632|GO:0004806|GO:0043691|GO:0030169|GO:0070328|GO:0004620|GO:0005615|GO:0034372|GO:0034374|GO:0034382|GO:0034364|GO:0034373|GO:0034375|GO:0006633|GO:0034638|GO:0019433|GO:0034185|GO:0008201|GO:0008203	58861070	chr15	58861011	+	hs|15q21.3	NM_000236	chr15:58861011-58861070	NM_000236	Hs.654472
A_23_P7896	3.99339	1.99761	3.99339	up	dual specificity phosphatase 22	DUSP22	FALSE	Homo sapiens dual specificity phosphatase 22 (DUSP22), transcript variant 2, mRNA [NM_020185]	56940	GO:0008283|GO:0046330|GO:0006915|GO:0005634|GO:0007275|GO:0000122|GO:0035335|GO:0000188|GO:0005737|GO:0006470|GO:0042127|GO:0007179|GO:0008138|GO:0004725	345896	chr6	335147	+	hs|6p25.3	NM_020185	chr6:335147-345896	NM_020185	Hs.29106
A_24_P925040	3.9932	1.99754	3.9932	up	caveolin 2	CAV2	FALSE	Homo sapiens caveolin 2 (CAV2), transcript variant 1, mRNA [NM_001233]	858	GO:0051219|GO:0005515|GO:0030133|GO:0048471|GO:0005886|GO:0007268|GO:0005634|GO:0051259|GO:0006906|GO:0042803|GO:0070836|GO:0005829|GO:0005622|GO:0016050|GO:0031748|GO:0060161|GO:0002080|GO:0048278|GO:0030512|GO:0005811|GO:0019905|GO:0007088|GO:0005794|GO:0009986|GO:0048741|GO:0031410|GO:0031234|GO:0043234|GO:0001938|GO:0000139|GO:0016020|GO:0005887|GO:0001937|GO:0005901|GO:0045121|GO:0007005|GO:…	116148320	chr7	116148261	+	hs|7q31.2	NM_001233	chr7:116148261-116148320	NM_001233	Hs.212332
A_19_P00318751	3.99244	1.99727	3.99244	up			FALSE				66504146	chr8	66504087	-	hs|8q13.1		chr8:66504146-66504087
A_19_P00800984	3.99153	1.99694	3.99153	up			FALSE				35590948	chr22	35590889	+	hs|22q12.3		chr22:035590889-035590948
A_23_P144071	3.97782	1.99198	3.97782	up	collagen, type VII, alpha 1	COL7A1	FALSE	Homo sapiens collagen, type VII, alpha 1 (COL7A1), mRNA [NM_000094]	1294	GO:0005515|GO:0004867|GO:0005590|GO:0005576|GO:0005615|GO:0042802|GO:0005604|GO:0031012|GO:0010951|GO:0008544|GO:0022617|GO:0030198|GO:0030574|GO:0005788|GO:0007155	48602588	chr3	48602401	-	hs|3p21.31	NM_000094	chr3:48602588-48602401	NM_000094	Hs.476218
A_23_P64792	3.97656	1.99152	3.97656	up	potassium large conductance calcium-activated channel, subfamily M, beta member 4	KCNMB4	FALSE	Homo sapiens potassium large conductance calcium-activated channel, subfamily M, beta member 4 (KCNMB4), mRNA [NM_014505]	27345	GO:0005515|GO:0005513|GO:0005886|GO:0007268|GO:0046928|GO:0019228|GO:0019229|GO:0005887|GO:0007596|GO:0008076|GO:0001508|GO:0006813|GO:0015269|GO:0071805	70824682	chr12	70824623	+	hs|12q15	NM_014505	chr12:70824623-70824682	NM_014505	Hs.525529
A_33_P3261620	3.97429	1.9907	3.97429	up	growth hormone secretagogue receptor	GHSR	FALSE	Homo sapiens growth hormone secretagogue receptor (GHSR), transcript variant 1b, mRNA [NM_004122]	2693	GO:0008343|GO:0043005|GO:0005886|GO:0032691|GO:0032100|GO:0016520|GO:0045409|GO:0032094|GO:0046697|GO:0045923|GO:0001616|GO:0030252|GO:0009725|GO:0040018|GO:0046676|GO:0051963|GO:0032869|GO:0009986|GO:0004930|GO:0042536|GO:0009755|GO:0007186|GO:0008154|GO:0043568|GO:0050728|GO:0045121|GO:0016021|GO:0017046|GO:0043134	172165543	chr3	172165484	-	hs|3q26.31	NM_004122	chr3:172165543-172165484	NM_004122	Hs.130212
A_33_P3257187	3.97387	1.99054	3.97387	up	protein kinase, AMP-activated, alpha 1 catalytic subunit	PRKAA1	FALSE	Homo sapiens protein kinase, AMP-activated, alpha 1 catalytic subunit (PRKAA1), transcript variant 2, mRNA [NM_206907]	5562	GO:0005515|GO:0006695|GO:0070301|GO:0004679|GO:0047322|GO:0050321|GO:0005622|GO:0031669|GO:0016055|GO:0045821|GO:0010332|GO:0008610|GO:0019395|GO:0031588|GO:0009631|GO:0035174|GO:0046318|GO:0048511|GO:0004691|GO:0045542|GO:0010508|GO:0050405|GO:0008286|GO:0008284|GO:0032007|GO:0050995|GO:0005634|GO:0051291|GO:0046872|GO:0005829|GO:0000187|GO:0005737|GO:0016324|GO:0031000|GO:0006006|GO:0007050|GO:…	40759657	chr5	40759598	-	hs|5p13.1	NM_206907	chr5:40759657-40759598	NM_206907	Hs.43322
A_33_P3378126	3.97315	1.99028	3.97315	up	F-box protein 32	FBXO32	FALSE	Homo sapiens F-box protein 32 (FBXO32), transcript variant 1, mRNA [NM_058229]	114907	GO:0005515|GO:0030018|GO:0016567|GO:0005730|GO:0014894	124515447	chr8	124515388	-	hs|8q24.13	NM_058229	chr8:124515447-124515388	NM_058229	Hs.403933
A_33_P3382709	3.95598	1.98403	3.95598	up	LEM domain containing 3	LEMD3	FALSE	Homo sapiens LEM domain containing 3 (LEMD3), transcript variant 1, mRNA [NM_014319]	23592	GO:0030514|GO:0005515|GO:0016020|GO:0000166|GO:0051726|GO:0005637|GO:0032926|GO:0016021|GO:0035914|GO:0003677|GO:0030512|GO:0005639	65642046	chr12	65641987	+	hs|12q14.3	NM_014319	chr12:65641987-65642046	NM_014319	Hs.744150
A_24_P401090	3.94574	1.9803	3.94574	up			FALSE				39176015	chr1	39175954	+	hs|1p34.3		chr1:039175954-039176015
A_23_P314805	3.94478	1.97995	3.94478	up	transmembrane protein 56	TMEM56	FALSE	Homo sapiens transmembrane protein 56 (TMEM56), transcript variant 2, mRNA [NM_152487]	148534	GO:0008150|GO:0003674|GO:0016021|GO:0005575	95658474	chr1	95658415	+	hs|1p21.3	NM_152487	chr1:95658415-95658474	NM_152487	Hs.483512
A_33_P3209476	3.93959	1.97805	3.93959	up	cerebral cavernous malformation 2	CCM2	FALSE	Homo sapiens cerebral cavernous malformation 2 (CCM2), transcript variant 2, mRNA [NM_031443]	83605	GO:0005515|GO:0048839|GO:0048845|GO:0001701|GO:0051403|GO:0060039|GO:0045216|GO:0060837|GO:0043234|GO:0005737|GO:0001885|GO:0035264|GO:0061154|GO:0007229|GO:0001570	45116068	chr7	45116009	+	hs|7p13	NM_031443	chr7:45116009-45116068	NM_031443	Hs.148272
A_33_P3276693	3.9233	1.97207	3.9233	up	placental growth factor	PGF	FALSE	Homo sapiens placental growth factor (PGF), transcript variant 1, mRNA [NM_002632]	5228	GO:0005515|GO:0048010|GO:0001666|GO:0001658|GO:0007565|GO:0008284|GO:0046982|GO:0042493|GO:0031100|GO:0007267|GO:0002040|GO:0005576|GO:0060688|GO:0005615|GO:0045766|GO:0042803|GO:0032870|GO:0030154|GO:0007165|GO:0016020|GO:0001938|GO:0051781|GO:0008083|GO:0008201	75408599	chr14	75408540	-	hs|14q24.3	NM_002632	chr14:75408599-75408540	NM_002632	Hs.252820
A_19_P00806771	3.91873	1.97039	3.91873	up	long intergenic non-protein coding RNA 659	LINC00659	FALSE	Homo sapiens long intergenic non-protein coding RNA 659 (LINC00659), transcript variant 1, long non-coding RNA [NR_046224]	100652730		61405554	chr20	61405495	-	hs|20q13.33	NR_046224	chr20:61405554-61405495	NR_046224	Hs.254951
A_19_P00331909	3.91379	1.96856	3.91379	up			FALSE				238359347	chr2	238359288	-	hs|2q37.3		chr2:238359347-238359288
A_32_P157945	3.90637	1.96583	3.90637	up	desmoplakin	DSP	FALSE	Homo sapiens desmoplakin (DSP), transcript variant 1, mRNA [NM_004415]	1832	GO:0005882|GO:0005515|GO:0030057|GO:0045109|GO:0005886|GO:0005634|GO:0086091|GO:0001533|GO:0006921|GO:0005916|GO:0005739|GO:0016323|GO:0086069|GO:0016337|GO:0003223|GO:0014704|GO:0097110|GO:0005080|GO:0030674|GO:0050839|GO:0086005|GO:0070062|GO:0006915|GO:0002934|GO:0018149|GO:0008544|GO:0005198|GO:0030216|GO:0071896|GO:0042060|GO:0005200|GO:0034332	7586641	chr6	7586582	+	hs|6p24.3	NM_004415	chr6:7586582-7586641	NM_004415	Hs.519873
A_23_P110403	3.90509	1.96535	3.90509	up	PDZ and LIM domain 3	PDLIM3	FALSE	Homo sapiens PDZ and LIM domain 3 (PDLIM3), transcript variant 1, mRNA [NM_014476]	27295	GO:0008092|GO:0007507|GO:0005515|GO:0030018|GO:0005737|GO:0008270|GO:0007015|GO:0015629|GO:0008307	186423262	chr4	186423203	-	hs|4q35.1	NM_014476	chr4:186423262-186423203	NM_014476	Hs.701364
A_19_P00319784	3.90445	1.96512	3.90445	up			FALSE				40682131	chr6	40682072	+	hs|6p21.1		chr6:040682072-040682131
A_24_P171182	3.90333	1.96471	3.90333	up	acyl-CoA binding domain containing 3	ACBD3	FALSE	Homo sapiens acyl-CoA binding domain containing 3 (ACBD3), mRNA [NM_022735]	64746	GO:0005739|GO:0005515|GO:0006694|GO:0005794|GO:0000139|GO:0006810|GO:0016021|GO:0000062	226333332	chr1	226333273	-	hs|1q42.12	NM_022735	chr1:226333332-226333273	NM_022735	Hs.520207
A_19_P00329102	3.90078	1.96376	3.90078	up			FALSE				24231563	chr19	24231504	+	hs|19p12		chr19:024231504-024231563
A_33_P3258324	3.89929	1.96321	3.89929	up			FALSE	PREDICTED: Homo sapiens uncharacterized LOC102724299 (LOC102724299), ncRNA [XR_424957]			15962862	chr19	15962803	-	hs|19p13.12	XR_424957	chr19:15962862-15962803	XR_424957
A_33_P3268304	3.89898	1.9631	3.89898	up	LIM and senescent cell antigen-like domains 2	LIMS2	FALSE	Homo sapiens LIM and senescent cell antigen-like domains 2 (LIMS2), transcript variant 5, mRNA [NM_001161404]	55679	GO:2001046|GO:0016337|GO:0005886|GO:0034329|GO:0008270|GO:0005634|GO:0005925|GO:0045216|GO:0005829	128396064	chr2	128396005	-	hs|2q14.3	NM_001161404	chr2:128396064-128396005	NM_001161404	Hs.469881
A_23_P211126	3.89886	1.96305	3.89886	up	dual-specificity tyrosine-(Y)-phosphorylation regulated kinase 1A	DYRK1A	FALSE	Homo sapiens dual-specificity tyrosine-(Y)-phosphorylation regulated kinase 1A (DYRK1A), transcript variant 2, mRNA [NM_130436]	1859	GO:0005515|GO:0048156|GO:0018108|GO:0005634|GO:0043621|GO:0005524|GO:0090312|GO:0007399|GO:0046777|GO:0004672|GO:0018105|GO:0016607|GO:0004674|GO:0030529|GO:0018107|GO:0043518|GO:0007623|GO:0004712|GO:0005654|GO:0006468|GO:0004713|GO:0000278|GO:0004715	38887137	chr21	38887078	+	hs|21q22.13	NM_130436	chr21:38887078-38887137	NM_130436	Hs.368240
A_19_P00328886	3.89723	1.96245	3.89723	up	taurine up-regulated 1 (non-protein coding)	TUG1	FALSE	Homo sapiens taurine up-regulated 1 (non-protein coding) (TUG1), transcript variant 1, long non-coding RNA [NR_110492]	55000		31375336	chr22	31375277	+	hs|22q12.2	NR_110492	chr22:31375277-31375336	NR_110492	Hs.554829
A_23_P359214	3.89023	1.95986	3.89023	up	long intergenic non-protein coding RNA 842	LINC00842	FALSE	Homo sapiens long intergenic non-protein coding RNA 842 (LINC00842), long non-coding RNA [NR_033957]	643650		47151178	chr10	47151119	-	hs|10q11.22	NR_033957	chr10:47151178-47151119	NR_033957	Hs.744313
A_23_P170608	3.88885	1.95934	3.88885	up	TSPY-like 2	TSPYL2	FALSE	Homo sapiens TSPY-like 2 (TSPYL2), mRNA [NM_022117]	64061	GO:0045859|GO:0030308|GO:0005813|GO:0006355|GO:0005886|GO:0005730|GO:0006334|GO:0005634|GO:0009966|GO:0045786|GO:0006351|GO:0030968|GO:0005737|GO:0007049|GO:0000182|GO:0005654|GO:0008156|GO:0006987|GO:0044267|GO:0016568	53115423	chrX	53115364	+	hs|Xp11.22	NM_022117	chrX:53115364-53115423	NM_022117	Hs.136164
A_24_P279797	3.88806	1.95905	3.88806	up	methylthioribose-1-phosphate isomerase 1	MRI1	FALSE	Homo sapiens methylthioribose-1-phosphate isomerase 1 (MRI1), transcript variant 1, mRNA [NM_001031727]	84245	GO:0034641|GO:0005737|GO:0000096|GO:0019509|GO:0006595|GO:0005730|GO:0019284|GO:0044281|GO:0042995|GO:0046523|GO:0042802|GO:0005829	13885076	chr19	13885017	+	hs|19p13.2	NM_001031727	chr19:13885017-13885076	NM_001031727	Hs.439370
A_19_P00321356	3.88552	1.95811	3.88552	up			FALSE				242908402	chr2	242908343	+	hs|2q37.3	TCONS_l2_00014338	chr2:242908343-242908402
A_33_P3244578	3.8825	1.95698	3.8825	up	uncharacterized LOC100129675	LOC100129675	FALSE	Homo sapiens cDNA FLJ43071 fis, clone BRTHA3009291. [AK125061]	100129675		242515292	chr2	242515233	+	hs|2q37.3	AK125061	chr2:242515233-242515292		Hs.591246
A_24_P76078	3.88152	1.95662	3.88152	up			FALSE				27348534	chr17	27348475	-	hs|17q11.2		chr17:027348534-027348475
A_32_P183442	3.88036	1.95619	3.88036	up		XLOC_014512	FALSE	BROAD Institute lincRNA (XLOC_014512), lincRNA [TCONS_l2_00021296]			132777618	chr4	132777559	-	hs|4q28.3		chr4:132777618-132777559		Hs.522180
A_23_P433369	3.8797	1.95594	3.8797	up	HEAT repeat containing 5A	HEATR5A	FALSE	Homo sapiens HEAT repeat containing 5A (HEATR5A), mRNA [NM_015473]	25938		31761197	chr14	31761138	-	hs|14q12	NM_015473	chr14:31761197-31761138	NM_015473	Hs.744979
A_23_P303810	3.86939	1.9521	3.86939	up	beta-gamma crystallin domain containing 3	CRYBG3	FALSE	Homo sapiens beta-gamma crystallin domain containing 3 (CRYBG3), mRNA [NM_153605]	131544		97663769	chr3	97663710	+	hs|3q11.2	NM_153605	chr3:97663710-97663769	NM_153605	Hs.733378
A_33_P3343605	3.86196	1.94933	3.86196	up			FALSE				21668494	chr13	21668435	-	hs|13q12.11		chr13:021668494-021668435
A_23_P24784	3.85879	1.94815	3.85879	up	troponin I type 2 (skeletal, fast)	TNNI2	FALSE	Homo sapiens troponin I type 2 (skeletal, fast) (TNNI2), transcript variant 1, mRNA [NM_003282]	7136	GO:0005515|GO:0031014|GO:0030049|GO:0005861|GO:0003009|GO:0005634|GO:0003779|GO:0045893|GO:0005829	1862744	chr11	1862437	+	hs|11p15.5	NM_003282	chr11:1862437-1862744	NM_003282	Hs.523403
A_23_P360754	3.85701	1.94748	3.85701	up	ADAM metallopeptidase with thrombospondin type 1 motif, 4	ADAMTS4	FALSE	Homo sapiens ADAM metallopeptidase with thrombospondin type 1 motif, 4 (ADAMTS4), mRNA [NM_005099]	9507	GO:0005515|GO:0005578|GO:0005576|GO:0002020|GO:0005615|GO:0001501|GO:0022617|GO:0030198|GO:0006508|GO:0008233|GO:0008270|GO:0004222|GO:0008237	161159705	chr1	161159646	-	hs|1q23.3	NM_005099	chr1:161159705-161159646	NM_005099	Hs.211604
A_24_P199500	3.85699	1.94747	3.85699	up	ring finger protein 2	RNF2	FALSE	Homo sapiens ring finger protein 2 (RNF2), mRNA [NM_007212]	6045	GO:0035102|GO:0031519|GO:0005515|GO:0035518|GO:0004842|GO:0016874|GO:0005730|GO:0000151|GO:0005634|GO:0000122|GO:0001739|GO:0001702|GO:0006351|GO:0016604|GO:0009948|GO:0071339|GO:0003682|GO:0005654|GO:0008270|GO:0071535|GO:0000278	185071183	chr1	185071124	+	hs|1q25.3	NM_007212	chr1:185071124-185071183	NM_007212	Hs.591490
A_24_P358131	3.84455	1.94282	3.84455	up			FALSE				32048352	chr2	32048291	-	hs|2p23.1		chr2:032048352-032048291
A_19_P00801269	3.84055	1.94131	3.84055	up			FALSE				3717247	chr6	3717188	-	hs|6p25.2		chr6:003717247-003717188
A_33_P3305625	3.8388	1.94066	3.8388	up			FALSE	Homo sapiens cDNA FLJ42518 fis, clone BRACE3000697. [AK124509]			230696384	chr2	230696325	-	hs|2q36.3	AK124509	chr2:230696384-230696325		Hs.591633
A_23_P311192	3.83586	1.93955	3.83586	up	serine palmitoyltransferase, long chain base subunit 1	SPTLC1	FALSE	Homo sapiens serine palmitoyltransferase, long chain base subunit 1 (SPTLC1), transcript variant 2, mRNA [NM_178324]	10558	GO:0005515|GO:0006665|GO:0004758|GO:0006686|GO:0030148|GO:0035339|GO:0044281|GO:0030170|GO:0005789|GO:0016021|GO:0046513|GO:0017059|GO:0046512|GO:0046511	94841803	chr9	94841744	-	hs|9q22.31	NM_178324	chr9:94841803-94841744	NM_178324	Hs.90458
A_23_P10518	3.83098	1.93771	3.83098	up	transcription factor Dp family, member 3	TFDP3	FALSE	Homo sapiens transcription factor Dp family, member 3 (TFDP3), mRNA [NM_016521]	51270	GO:0005667|GO:0006355|GO:0005737|GO:0000082|GO:0003700|GO:0046982|GO:0005634|GO:0003677|GO:0006974|GO:0006351	132351715	chrX	132351656	-	hs|Xq26.2	NM_016521	chrX:132351715-132351656	NM_016521	Hs.142908
A_23_P34942	3.82979	1.93726	3.82979	up	ecotropic viral integration site 5	EVI5	FALSE	Homo sapiens ecotropic viral integration site 5 (EVI5), mRNA [NM_005665]	7813	GO:0005515|GO:0007049|GO:0005794|GO:0005815|GO:0008283|GO:0005819|GO:0032851|GO:0007275|GO:0005634|GO:0005097|GO:0051301|GO:0043231	93142735	chr1	93131511	-	hs|1p22.1	NM_005665	chr1:93142735-93131511	NM_005665	Hs.594434
A_33_P3302393	3.8281	1.93663	3.8281	up	kelch-like family member 36	KLHL36	FALSE	Homo sapiens kelch-like family member 36 (KLHL36), mRNA [NM_024731]	79786	GO:0016567	84695915	chr16	84695856	+	hs|16q24.1	NM_024731	chr16:84695856-84695915	NM_024731	Hs.578546
A_32_P231568	3.82241	1.93448	3.82241	up	RAS and EF-hand domain containing	RASEF	FALSE	Homo sapiens RAS and EF-hand domain containing (RASEF), mRNA [NM_152573]	158158	GO:0048471|GO:0007264|GO:0005509|GO:0015031|GO:0005525	85597575	chr9	85597516	-	hs|9q21.32	NM_152573	chr9:85597575-85597516	NM_152573	Hs.129136
A_33_P3216059	3.82228	1.93443	3.82228	up	asporin	ASPN	FALSE	Homo sapiens asporin (ASPN), transcript variant 2, mRNA [NM_001193335]	54829	GO:0031012|GO:0070171|GO:0005518|GO:0005509|GO:0005578|GO:0030282|GO:0030512	95227261	chr9	95227202	-	hs|9q22.31	NM_001193335	chr9:95227261-95227202	NM_001193335	Hs.435655
A_33_P3242014	3.82203	1.93434	3.82203	up	polyhomeotic homolog 1 (Drosophila)	PHC1	FALSE	Homo sapiens polyhomeotic homolog 1 (Drosophila) (PHC1), mRNA [NM_004426]	1911	GO:0031519|GO:0035102|GO:0016574|GO:0071300|GO:0005730|GO:0005634|GO:0007275|GO:0001739|GO:0003677|GO:0016604|GO:0003682|GO:0005654|GO:0008270	9094016	chr12	9093957	+	hs|12p13.31	NM_004426	chr12:9093957-9094016	NM_004426	Hs.744902
A_33_P3250165	3.82183	1.93427	3.82183	up	ermin, ERM-like protein	ERMN	FALSE	Homo sapiens ermin, ERM-like protein (ERMN), transcript variant 2, mRNA [NM_020711]	57471	GO:0008360|GO:0033270|GO:0030175|GO:0005737|GO:0031344|GO:0033269|GO:0051015|GO:0043209|GO:0043025|GO:0007015|GO:0005856|GO:0005938|GO:0070062|GO:0001763	158181242	chr2	158181183	-	hs|2q24.1	NM_020711	chr2:158181242-158181183	NM_020711	Hs.443894
A_24_P73730	3.8144	1.93146	3.8144	up	coiled-coil domain containing 113	CCDC113	FALSE	Homo sapiens coiled-coil domain containing 113 (CCDC113), transcript variant 1, mRNA [NM_014157]	29070	GO:0043234|GO:0005737|GO:0005730|GO:0005634	58317339	chr16	58317280	+	hs|16q21	NM_014157	chr16:58317280-58317339	NM_014157	Hs.11614
A_32_P25357	3.81381	1.93123	3.81381	up	cadherin 15, type 1, M-cadherin (myotubule)	CDH15	FALSE	Homo sapiens cadherin 15, type 1, M-cadherin (myotubule) (CDH15), mRNA [NM_004933]	1013	GO:0042692|GO:0051149|GO:0031594|GO:0005886|GO:0034329|GO:0005901|GO:0005509|GO:0016021|GO:0007155|GO:0007156|GO:0045216|GO:0034332	89261898	chr16	89261839	+	hs|16q24.3	NM_004933	chr16:89261839-89261898	NM_004933	Hs.148090
A_24_P381199	3.81297	1.93092	3.81297	up	tripartite motif containing 6	TRIM6	FALSE	Homo sapiens tripartite motif containing 6 (TRIM6), transcript variant 1, mRNA [NM_001003818]	117854	GO:0003674|GO:0070206|GO:0005737|GO:0008270	5633926	chr11	5633867	+	hs|11p15.4	NM_001003818	chr11:5633867-5633926	NM_001003818	Hs.729048
A_19_P00810853	3.80888	1.92937	3.80888	up			FALSE				105829016	chr3	105828957	-	hs|3q13.11		chr3:105829016-105828957
A_33_P3371650	3.80433	1.92764	3.80433	up	serine/threonine kinase 17b	STK17B	FALSE	Homo sapiens serine/threonine kinase 17b (apoptosis-inducing), mRNA (cDNA clone IMAGE:6280720), partial cds. [BC052561]	9262	GO:0035556|GO:0005793|GO:0046777|GO:0004672|GO:0005886|GO:0004674|GO:0006915|GO:0006468|GO:0005634|GO:0015629|GO:0005524|GO:2000271	197034187	chr2	197034128	-	hs|2q32.3	BC052561	chr2:197034187-197034128		Hs.88297
A_32_P95462	3.80369	1.9274	3.80369	up	syntaxin binding protein 5-like	STXBP5L	FALSE	Homo sapiens syntaxin binding protein 5-like (STXBP5L), mRNA [NM_014980]	9515	GO:0019905|GO:0005737|GO:0005886|GO:0017157|GO:0042593|GO:0016021|GO:0015031|GO:0006887|GO:0046676	121143356	chr3	121143297	+	hs|3q13.33	NM_014980	chr3:121143297-121143356	NM_014980	Hs.477315
A_33_P3280927	3.8016	1.92661	3.8016	up	small nucleolar RNA host gene 7 (non-protein coding)	SNHG7	FALSE	Homo sapiens small nucleolar RNA host gene 7 (non-protein coding) (SNHG7), transcript variant 2, long non-coding RNA [NR_024542]	84973		139619106	chr9	139619047	-	hs|9q34.3	NR_024542	chr9:139619106-139619047	NR_024542	Hs.495480
A_24_P186943	3.79936	1.92576	3.79936	up	elastin	ELN	FALSE	Homo sapiens elastin (ELN), transcript variant 1, mRNA [NM_000501]	2006	GO:0005515|GO:0007585|GO:0008283|GO:0008015|GO:0043149|GO:0050840|GO:0005578|GO:0005576|GO:0030023|GO:0071953|GO:0005739|GO:0030833|GO:0022617|GO:0030198|GO:0001974|GO:0007519|GO:0009887|GO:0005201	73474823	chr7	73474764	+	hs|7q11.23	NM_000501	chr7:73474764-73474823	NM_000501	Hs.647061
A_32_P165340	3.79615	1.92454	3.79615	up	signal recognition particle 9kDa	SRP9	FALSE	Homo sapiens signal recognition particle 9kDa (SRP9), transcript variant 2, mRNA [NM_003133]	6726	GO:0005786|GO:0010467|GO:0005785|GO:0006614|GO:0003723|GO:0008312|GO:0005047|GO:0044267|GO:0006412|GO:0070062|GO:0045900|GO:0005829	225978102	chr1	225978043	+	hs|1q42.12	NM_003133	chr1:225978043-225978102	NM_003133	Hs.511425
A_19_P00330794	3.79454	1.92392	3.79454	up			FALSE				153810371	chr5	153810312	-	hs|5q33.2		chr5:153810371-153810312
A_33_P3214209	3.78618	1.92074	3.78618	up	glucuronidase, beta pseudogene 1	GUSBP1	FALSE	Homo sapiens glucuronidase, beta pseudogene 1 (GUSBP1), transcript variant 2, non-coding RNA [NR_027027]	728411		21474540	chr5	21474481	+	hs|5p14.3	NR_027027	chr5:21474481-21474540	NR_027027	Hs.88181
A_24_P401601	3.78357	1.91975	3.78357	up			FALSE				21145465	chr19	21145404	+	hs|19p12		chr19:021145404-021145465
A_24_P417526	3.78328	1.91964	3.78328	up	FSHD region gene 1 family, member B	FRG1B	FALSE	Homo sapiens FSHD region gene 1 family, member B (FRG1B), non-coding RNA [NR_003579]	284802		29625948	chr20	29625889	+	hs|20q11.21	NR_003579	chr20:29625889-29625948	NR_003579	Hs.653099
A_19_P00321512	3.7808	1.91869	3.7808	up			FALSE				57762082	chr12	57762023	-	hs|12q13.3		chr12:057762082-057762023
A_23_P16992	3.77723	1.91733	3.77723	up	plakophilin 4	PKP4	FALSE	Homo sapiens plakophilin 4 (PKP4), transcript variant 1, mRNA [NM_003628]	8502	GO:0005515|GO:0030057|GO:0072686|GO:0048471|GO:0005886|GO:0032467|GO:0044291|GO:0007267|GO:0030496|GO:0051233|GO:0030155|GO:0010628|GO:0000922|GO:0005737|GO:0016337|GO:0032321|GO:0005911|GO:0007043|GO:0009898|GO:0005856	159537292	chr2	159537233	+	hs|2q24.1	NM_003628	chr2:159537233-159537292	NM_003628	Hs.407580
A_23_P106922	3.77472	1.91637	3.77472	up	carbohydrate (N-acetylglucosamine 6-O) sulfotransferase 6	CHST6	FALSE	Homo sapiens carbohydrate (N-acetylglucosamine 6-O) sulfotransferase 6 (CHST6), mRNA [NM_021615]	4166	GO:0006790|GO:0005794|GO:0018146|GO:0000139|GO:0005975|GO:0006044|GO:0044281|GO:0016021|GO:0001517|GO:0030203|GO:0042339	75507046	chr16	75507022	-	hs|16q23.1	NM_021615	chr16:75507046-75507022	NM_021615	Hs.655622
A_24_P787897	3.77329	1.91582	3.77329	up	xylosyltransferase I	XYLT1	FALSE	Homo sapiens xylosyltransferase I (XYLT1), mRNA [NM_022166]	64131	GO:0034605|GO:0008375|GO:0030206|GO:0000139|GO:0005789|GO:0030158|GO:0005576|GO:0016021|GO:0015012|GO:0006024	17196526	chr16	17196467	-	hs|16p12.3	NM_022166	chr16:17196526-17196467	NM_022166	Hs.22907
A_23_P416036	3.76948	1.91436	3.76948	up	HAUS augmin-like complex, subunit 7	HAUS7	FALSE	Homo sapiens HAUS augmin-like complex, subunit 7 (HAUS7), transcript variant 1, mRNA [NM_017518]	55559	GO:0051297|GO:0007067|GO:0005813|GO:0005737|GO:0005886|GO:0005874|GO:0005819|GO:0005730|GO:0070652|GO:0031996|GO:0051225	152719858	chrX	152713315	-	hs|Xq28	NM_017518	chrX:152719858-152713315	NM_017518	Hs.170835
A_33_P3422810	3.76922	1.91427	3.76922	up	UL16 binding protein 1	ULBP1	FALSE	Homo sapiens UL16 binding protein 1 (ULBP1), mRNA [NM_025218]	80329	GO:0030101|GO:0005886|GO:0019882|GO:0005783|GO:0046703|GO:0042267|GO:0050776|GO:0046658|GO:0003823	150292986	chr6	150292927	+	hs|6q25.1	NM_025218	chr6:150292927-150292986	NM_025218	Hs.653255
A_19_P00321509	3.76892	1.91415	3.76892	up	zinc finger protein 207	ZNF207	FALSE	zinc finger protein 207 [Source:HGNC Symbol;Acc:12998] [ENST00000581531]	7756	GO:0005515|GO:0008017|GO:0007094|GO:0006355|GO:0003700|GO:0005874|GO:0051983|GO:0050821|GO:0005634|GO:0003677|GO:0000070|GO:0000777|GO:0000776|GO:0008270|GO:0008608|GO:0008201	30707386	chr17	30707327	+	hs|17q11.2	AK026215	chr17:30707327-30707386		Hs.500775
A_24_P84880	3.76615	1.91309	3.76615	up	actin pseudogene	LOC148709	FALSE	Homo sapiens actin pseudogene (LOC148709), non-coding RNA [NR_002929]	148709		202843229	chr1	202843170	+	hs|1q32.1		chr1:202843170-202843229	NR_002929	Hs.162880
A_33_P3334908	3.7592	1.91043	3.7592	up	dehydrogenase/reductase (SDR family) X-linked	DHRSX	FALSE	Homo sapiens dehydrogenase/reductase (SDR family) X-linked (DHRSX), mRNA [NM_145177]	207063	GO:0016491|GO:0055114	2137617	chrX	2137558	-	hs|Xp22.33	NM_145177	chrX:2137617-2137558	NM_145177	Hs.131452
A_23_P148879	3.75557	1.90903	3.75557	up	ATPase, Na+/K+ transporting, alpha 2 polypeptide	ATP1A2	FALSE	Homo sapiens ATPase, Na+/K+ transporting, alpha 2 polypeptide (ATP1A2), mRNA [NM_000702]	477	GO:0008344|GO:0005886|GO:0045202|GO:0006942|GO:0006940|GO:0046872|GO:0019229|GO:0040011|GO:0006754|GO:0005737|GO:0002087|GO:0034220|GO:0043197|GO:0045988|GO:0035725|GO:0006814|GO:0045822|GO:0006813|GO:0086004|GO:0005391|GO:0051481|GO:0030315|GO:0005890|GO:0055085|GO:0005524|GO:0002026|GO:0005901|GO:0008542|GO:0001504|GO:0008217|GO:0015991|GO:0071260|GO:0005768|GO:0035094	160113334	chr1	160113275	+	hs|1q23.2	NM_000702	chr1:160113275-160113334	NM_000702	Hs.34114
A_23_P74609	3.75499	1.90881	3.75499	up	G0/G1 switch 2	G0S2	FALSE	Homo sapiens G0/G1 switch 2 (G0S2), mRNA [NM_015714]	50486	GO:0005811|GO:0005739|GO:0005515|GO:0003674|GO:2001238|GO:0044281|GO:0097191|GO:0044255	209849656	chr1	209849597	+	hs|1q32.2	NM_015714	chr1:209849597-209849656	NM_015714	Hs.432132
A_23_P34433	3.74965	1.90676	3.74965	up	zinc finger, CCHC domain containing 11	ZCCHC11	FALSE	Homo sapiens zinc finger, CCHC domain containing 11 (ZCCHC11), transcript variant 1, mRNA [NM_001009881]	23318	GO:0032755|GO:0005515|GO:0005730|GO:0031123|GO:0032088|GO:0001816|GO:0005615|GO:0050265|GO:0010587|GO:0010586|GO:0005737|GO:0019827|GO:0031054|GO:0071044|GO:0008270|GO:0031664|GO:0070102|GO:0070062	52889223	chr1	52889164	-	hs|1p32.3	NM_001009881	chr1:52889223-52889164	NM_001009881	Hs.655407
A_19_P00322828	3.74952	1.90671	3.74952	up	myocardial infarction associated transcript (non-protein coding)	MIAT	FALSE	Homo sapiens myocardial infarction associated transcript (non-protein coding) (MIAT), transcript variant 1, long non-coding RNA [NR_003491]	440823		27064198	chr22	27064139	+	hs|22q12.1	NR_003491	chr22:27064139-27064198	NR_003491	Hs.517502
A_24_P462899	3.74928	1.90662	3.74928	up	centromere protein W	CENPW	FALSE	Homo sapiens centromere protein W (CENPW), transcript variant 2, mRNA [NM_001012507]	387103	GO:0005515|GO:0051276|GO:0046982|GO:0005730|GO:0003677|GO:0016363|GO:0034080|GO:0007067|GO:0051382|GO:0007059|GO:0000777|GO:0000776|GO:0000278|GO:0000775	126669682	chr6	126669623	+	hs|6q22.32	NM_001012507	chr6:126669623-126669682	NM_001012507	Hs.486401
A_33_P3212645	3.74618	1.90542	3.74618	up	notch 2 N-terminal like	NOTCH2NL	FALSE	Homo sapiens notch 2 N-terminal like (NOTCH2NL), mRNA [NM_203458]	388677	GO:0005737|GO:0007219|GO:0005509|GO:0007275|GO:0005576|GO:0030154	145282058	chr1	145281999	+	hs|1q21.1	NM_203458	chr1:145281999-145282058	NM_203458	Hs.728902
A_19_P00327216	3.74116	1.90349	3.74116	up			FALSE				238037678	chr2	238037619	+	hs|2q37.3		chr2:238037619-238037678
A_33_P3287972	3.73444	1.90089	3.73444	up	RAS p21 protein activator 2	RASA2	FALSE	Homo sapiens RAS p21 protein activator 2 (RASA2), mRNA [NM_006506]	5922	GO:0035556|GO:0005099|GO:0046580|GO:0007165|GO:0048471|GO:0005737|GO:0032320|GO:0031235|GO:0046872	141328906	chr3	141328847	+	hs|3q23	NM_006506	chr3:141328847-141328906	NM_006506	Hs.655941
A_33_P3233459	3.73177	1.89986	3.73177	up	long intergenic non-protein coding RNA 994	LINC00994	FALSE	Homo sapiens long intergenic non-protein coding RNA 994 (LINC00994), long non-coding RNA [NR_033978]	100287879		64064096	chr3	64064037	-	hs|3p14.1		chr3:64064096-64064037	NR_033978	Hs.452789
A_23_P31873	3.72039	1.89545	3.72039	up	RAB11 family interacting protein 1 (class I)	RAB11FIP1	FALSE	Homo sapiens RAB11 family interacting protein 1 (class I) (RAB11FIP1), transcript variant 3, mRNA [NM_001002814]	80223	GO:0005737|GO:0030670|GO:0055037|GO:0015031|GO:0043231	37718295	chr8	37718236	-	hs|8p11.23	NM_001002814	chr8:37718295-37718236	NM_001002814	Hs.191179
A_33_P3609033	3.71877	1.89483	3.71877	up	HOXD antisense growth-associated long non-coding RNA	HAGLR	FALSE	Homo sapiens HOXD antisense growth-associated long non-coding RNA (HAGLR), transcript variant 1, long non-coding RNA [NR_110458]	401022		177038003	chr2	177037944	-	hs|2q31.1	NR_110458	chr2:177038003-177037944	NR_110458	Hs.98661
A_32_P15799	3.71852	1.89473	3.71852	up	high mobility group nucleosomal binding domain 2	HMGN2	FALSE	Homo sapiens high mobility group nucleosomal binding domain 2 (HMGN2), mRNA [NM_005517]	3151	GO:0005737|GO:0031492|GO:0005634|GO:0000785	26802458	chr1	26802399	+	hs|1p36.11	NM_005517	chr1:26802399-26802458	NM_005517	Hs.181163
A_24_P362540	3.71814	1.89458	3.71814	up	ArfGAP with SH3 domain, ankyrin repeat and PH domain 2	ASAP2	FALSE	Homo sapiens ArfGAP with SH3 domain, ankyrin repeat and PH domain 2 (ASAP2), transcript variant 1, mRNA [NM_003887]	8853	GO:0043547|GO:0005515|GO:0008060|GO:0005886|GO:0032312|GO:0032580|GO:0008270|GO:0043085|GO:0008047	9545365	chr2	9545306	+	hs|2p25.1	NM_003887	chr2:9545306-9545365	NM_003887	Hs.555902
A_23_P44643	3.71783	1.89446	3.71783	up	anaphase promoting complex subunit 7	ANAPC7	FALSE	Homo sapiens anaphase promoting complex subunit 7 (ANAPC7), transcript variant 1, mRNA [NM_016238]	51434	GO:0007094|GO:0019903|GO:0051437|GO:0005634|GO:0051436|GO:0031145|GO:0051439|GO:0005829|GO:0007067|GO:0070979|GO:0005680|GO:0005654|GO:0000278	110815226	chr12	110813991	-	hs|12q24.11	NM_016238	chr12:110815226-110813991	NM_016238	Hs.719935
A_33_P3344292	3.70637	1.89001	3.70637	up	sterile alpha motif domain containing 4A	SAMD4A	FALSE	sterile alpha motif domain containing 4A [Source:HGNC Symbol;Acc:23023] [ENST00000554335]	23034	GO:0017148|GO:0005737|GO:0030054|GO:0045202|GO:0045727|GO:0030371|GO:0030425	55033913	chr14	55033854	+	hs|14q22.2		chr14:55033854-55033913
A_23_P83781	3.70276	1.8886	3.70276	up	cytohesin 1	CYTH1	FALSE	Homo sapiens cytohesin 1 (CYTH1), transcript variant 1, mRNA [NM_004762]	9267	GO:0090162|GO:0005515|GO:0005802|GO:0005886|GO:0030155|GO:0043087|GO:0005829|GO:0008289|GO:0031234|GO:0005086|GO:0005737|GO:0032012|GO:0005923|GO:0016192	76670197	chr17	76670138	-	hs|17q25.3	NM_004762	chr17:76670197-76670138	NM_004762	Hs.191215
A_33_P3351606	3.69843	1.88691	3.69843	up	MIR124-2 host gene (non-protein coding)	MIR124-2HG	FALSE	Homo sapiens MIR124-2 host gene (non-protein coding) (MIR124-2HG), transcript variant 2, long non-coding RNA [NR_034102]	100130155		65290681	chr8	65290622	+	hs|8q12.3	NR_034102	chr8:65290622-65290681	NR_034102	Hs.7023
A_33_P3257943	3.69599	1.88596	3.69599	up	ribosomal protein L26	RPL26	FALSE	Homo sapiens ribosomal protein L26 (RPL26), mRNA [NM_000987]	6154	GO:0010467|GO:0003735|GO:0016070|GO:0016071|GO:0019083|GO:0003723|GO:0006364|GO:0006614|GO:0019058|GO:0006415|GO:0006412|GO:0006413|GO:0005829|GO:0006414|GO:0000184|GO:0016032|GO:0042273|GO:0022625|GO:0044267|GO:0070062	8280963	chr17	8280909	-	hs|17p13.1	NM_000987	chr17:8280963-8280909	NM_000987	Hs.644794
A_33_P3372979	3.6927	1.88468	3.6927	up	long intergenic non-protein coding RNA 294	LINC00294	FALSE	Homo sapiens long intergenic non-protein coding RNA 294 (LINC00294), long non-coding RNA [NR_015451]	283267		33100966	chr11	33100907	+	hs|11p13	NR_015451	chr11:33100907-33100966	NR_015451	Hs.533701
A_24_P930926	3.6918	1.88433	3.6918	up	BCL2-associated athanogene 4	BAG4	FALSE	Homo sapiens BCL2-associated athanogene 4 (BAG4), transcript variant 1, mRNA [NM_004874]	9530	GO:0051897|GO:0043066|GO:0005886|GO:2001145|GO:0051087|GO:0005634|GO:0072659|GO:0051291|GO:0005829|GO:0045785|GO:0035556|GO:0033138|GO:0010763|GO:0030838|GO:0071364|GO:0006457|GO:0090367|GO:0071356|GO:0051496|GO:0097178|GO:0005057	38070624	chr8	38070565	+	hs|8p11.23	NM_004874	chr8:38070565-38070624	NM_004874	Hs.194726
A_23_P213319	3.69027	1.88373	3.69027	up	ADAM metallopeptidase with thrombospondin type 1 motif, 6	ADAMTS6	FALSE	Homo sapiens ADAM metallopeptidase with thrombospondin type 1 motif, 6 (ADAMTS6), mRNA [NM_197941]	11174	GO:0006508|GO:0005578|GO:0008270|GO:0004222|GO:0008237	64444890	chr5	64444831	-	hs|5q12.3	NM_197941	chr5:64444890-64444831	NM_197941	Hs.482291
A_33_P3273552	3.68057	1.87993	3.68057	up	keratin 83	KRT83	FALSE	Homo sapiens keratin 83 (KRT83), mRNA [NM_002282]	3889	GO:0042633|GO:0008544|GO:0005198|GO:0007568|GO:0045095|GO:0005615	52709761	chr12	52709702	-	hs|12q13.13	NM_002282	chr12:52709761-52709702	NM_002282	Hs.720768
A_24_P127192	3.67733	1.87866	3.67733	up			FALSE				49142724	chr2	49142665	-	hs|2p16.3		chr2:049142724-049142665
A_33_P3283619	3.67466	1.87761	3.67466	up	SH2 domain containing 1A	SH2D1A	FALSE	Homo sapiens SH2 domain containing 1A (SH2D1A), transcript variant 2, mRNA [NM_001114937]	4068	GO:0005515|GO:0006968|GO:0005737|GO:0006959|GO:0005070|GO:0045954|GO:0007267|GO:0009967	123480570	chrX	123480511	+	hs|Xq25	NM_001114937	chrX:123480511-123480570	NM_001114937	Hs.349094
A_23_P111860	3.6735	1.87715	3.6735	up	Ras association and DIL domains	RADIL	FALSE	Homo sapiens Ras association and DIL domains (RADIL), mRNA [NM_018059]	55698	GO:0007165|GO:0005874|GO:0034446|GO:0007275	4838849	chr7	4838790	-	hs|7p22.1	NM_018059	chr7:4838849-4838790	NM_018059	Hs.667336
A_23_P101054	3.67297	1.87695	3.67297	up	keratin 34	KRT34	FALSE	Homo sapiens keratin 34 (KRT34), mRNA [NM_021013]	3885	GO:0005882|GO:0008544|GO:0005198|GO:0005615|GO:0070062	39534077	chr17	39534018	-	hs|17q21.2	NM_021013	chr17:39534077-39534018	NM_021013	Hs.296942
A_23_P381102	3.67243	1.87673	3.67243	up	coiled-coil domain containing 74B	CCDC74B	FALSE	Homo sapiens coiled-coil domain containing 74B (CCDC74B), transcript variant 1, mRNA [NM_207310]	91409		130897033	chr2	130896974	-	hs|2q21.1	NM_207310	chr2:130897033-130896974	NM_207310	Hs.29383
A_23_P139722	3.67048	1.87597	3.67048	up	tumor necrosis factor receptor superfamily, member 1A	TNFRSF1A	FALSE	Homo sapiens tumor necrosis factor receptor superfamily, member 1A (TNFRSF1A), mRNA [NM_001065]	7132	GO:0005515|GO:0008625|GO:0030424|GO:0033160|GO:0006693|GO:0005886|GO:0032715|GO:0045471|GO:0019221|GO:0005634|GO:0002020|GO:0051291|GO:0005615|GO:0032403|GO:0006954|GO:0071392|GO:0045944|GO:0032496|GO:0016032|GO:0043123|GO:0043200|GO:0042742|GO:0001666|GO:0043066|GO:0043120|GO:0008630|GO:0009986|GO:0032760|GO:0042511|GO:0006915|GO:0005576|GO:0043279|GO:0097190|GO:0033013|GO:0045766|GO:0033209|GO:…	6438123	chr12	6438064	-	hs|12p13.31	NM_001065	chr12:6438123-6438064	NM_001065	Hs.279594
A_24_P943095	3.66591	1.87417	3.66591	up	sperm antigen with calponin homology and coiled-coil domains 1	SPECC1	FALSE	Homo sapiens sperm antigen with calponin homology and coiled-coil domains 1 (SPECC1), transcript variant 1, mRNA [NM_001033553]	92521	GO:0005634|GO:0007155	20217750	chr17	20217691	+	hs|17p11.2	NM_001033553	chr17:20217691-20217750	NM_001033553	Hs.431045
A_23_P351734	3.66196	1.87262	3.66196	up	nephronophthisis 4	NPHP4	FALSE	Homo sapiens nephronophthisis 4 (NPHP4), transcript variant 1, mRNA [NM_015102]	261734	GO:0005515|GO:0005813|GO:0030036|GO:0060041|GO:0007632|GO:0035329|GO:0005829|GO:0005929|GO:0007165|GO:0016337|GO:0016020|GO:0005198|GO:0005911|GO:0005923	5922948	chr1	5922889	-	hs|1p36.31	NM_015102	chr1:5922948-5922889	NM_015102	Hs.462348
A_23_P435657	3.66039	1.872	3.66039	up	Alstrom syndrome 1 pseudogene	ALMS1P	FALSE	Homo sapiens Alstrom syndrome 1 pseudogene (ALMS1P), non-coding RNA [NR_003683]	200420	GO:0016197|GO:0051492	73899998	chr2	73899939	+	hs|2p13.1	NR_003683	chr2:73899939-73899998	NR_003683	Hs.745426
A_24_P332862	3.65821	1.87114	3.65821	up	zinc finger protein 493	ZNF493	FALSE	Homo sapiens zinc finger protein 493 (ZNF493), transcript variant 3, mRNA [NM_001076678]	284443	GO:0006355|GO:0003700|GO:0005634|GO:0003677|GO:0046872|GO:0006351	21606774	chr19	21606725	+	hs|19p12	NM_001076678	chr19:21606725-21606774	NM_001076678	Hs.656558
A_24_P33895	3.65557	1.8701	3.65557	up	activating transcription factor 3	ATF3	FALSE	Homo sapiens activating transcription factor 3 (ATF3), transcript variant 4, mRNA [NM_001040619]	467	GO:0005515|GO:0008284|GO:0000977|GO:0003700|GO:0003714|GO:0005730|GO:0006094|GO:0005634|GO:0035914|GO:0006351|GO:0042802|GO:0030968|GO:0045944|GO:0005654|GO:0006987|GO:0045892|GO:0044267	212792896	chr1	212792837	+	hs|1q32.3	NM_001040619	chr1:212792837-212792896	NM_001040619	Hs.460
A_33_P3392192	3.65475	1.86977	3.65475	up			FALSE	Homo sapiens MSTP131 (MST131) mRNA, complete cds. [AF176921]			32625379	chr8	32625320	+	hs|8p12	AF176921	chr8:32625320-32625379		Hs.668810
A_23_P254816	3.65287	1.86903	3.65287	up	transcription factor 15 (basic helix-loop-helix)	TCF15	FALSE	Homo sapiens transcription factor 15 (basic helix-loop-helix) (TCF15), mRNA [NM_004609]	6939	GO:0048339|GO:0003700|GO:0006357|GO:0001756|GO:0016265|GO:0048705|GO:0005634|GO:0003677|GO:0006351|GO:0043583|GO:0048644|GO:0003016|GO:0050884|GO:0046983|GO:0007498|GO:0042755|GO:0043588	585004	chr20	584945	-	hs|20p13	NM_004609	chr20:585004-584945	NM_004609	Hs.437
A_33_P3210443	3.65081	1.86822	3.65081	up	long intergenic non-protein coding RNA 637	LINC00637	FALSE	Homo sapiens long intergenic non-protein coding RNA 637 (LINC00637), long non-coding RNA [NR_038436]	145216		104322840	chr14	104322781	+	hs|14q32.33	NR_038436	chr14:104322781-104322840	NR_038436	Hs.578091
A_33_P3210488	3.65042	1.86806	3.65042	up	collagen, type VI, alpha 3	COL6A3	FALSE	Homo sapiens collagen, type VI, alpha 3 (COL6A3), transcript variant 1, mRNA [NM_004369]	1293	GO:0004867|GO:0005578|GO:0005576|GO:0005589|GO:0005615|GO:0042383|GO:0031012|GO:0010951|GO:0007517|GO:0022617|GO:0007411|GO:0030198|GO:0030574|GO:0005788|GO:0007155|GO:0070062	238234263	chr2	238234204	-	hs|2q37.3	NM_004369	chr2:238234263-238234204	NM_004369	Hs.233240
A_33_P3331853	3.65013	1.86795	3.65013	up	phosphodiesterase 1C, calmodulin-dependent 70kDa	PDE1C	FALSE	Homo sapiens phosphodiesterase 1C, calmodulin-dependent 70kDa (PDE1C), transcript variant 1, mRNA [NM_001191056]	5137	GO:0007165|GO:0005516|GO:0048011|GO:0007173|GO:0008543|GO:0045087|GO:0004117|GO:0008152|GO:0007202|GO:0046872|GO:0005829	31855668	chr7	31855609	-	hs|7p14.3	NM_001191056	chr7:31855668-31855609	NM_001191056	Hs.728862
A_33_P3210119	3.64669	1.86659	3.64669	up	major histocompatibility complex, class I, L (pseudogene)	HLA-L	FALSE	Homo sapiens major histocompatibility complex, class I, L (pseudogene) (HLA-L), non-coding RNA [NR_027822]	3139		30234728	chr6	30234669	+	hs|6p22.1	NR_027822	chr6:30234669-30234728	NR_027822	Hs.656020
A_24_P826348	3.64549	1.86611	3.64549	up	zinc finger CCCH-type containing 6	ZC3H6	FALSE	Homo sapiens zinc finger CCCH-type containing 6 (ZC3H6), mRNA [NM_198581]	376940	GO:0008150|GO:0003674|GO:0005575|GO:0046872	113097500	chr2	113097441	+	hs|2q13	NM_198581	chr2:113097441-113097500	NM_198581	Hs.190477
A_23_P104996	3.64369	1.8654	3.64369	up	bestrophin 1	BEST1	FALSE	Homo sapiens bestrophin 1 (BEST1), transcript variant 1, mRNA [NM_004183]	7439	GO:0030321|GO:0006821|GO:0005886|GO:0034707|GO:0055085|GO:0005254|GO:0005829|GO:0016323|GO:0034220|GO:0016020|GO:0050908|GO:0051924|GO:0016021|GO:0007601	61730340	chr11	61730281	+	hs|11q12.3	NM_004183	chr11:61730281-61730340	NM_004183	Hs.712676
A_33_P3354404	3.64231	1.86485	3.64231	up	keratin associated protein 12-2	KRTAP12-2	FALSE	Homo sapiens keratin associated protein 12-2 (KRTAP12-2), mRNA [NM_181684]	353323	GO:0045095	46086571	chr21	46086512	-	hs|21q22.3	NM_181684	chr21:46086571-46086512	NM_181684	Hs.567902
A_24_P212127	3.63677	1.86266	3.63677	up	zinc finger protein 33A	ZNF33A	FALSE	Homo sapiens zinc finger protein 33A (ZNF33A), transcript variant 1, mRNA [NM_006954]	7581	GO:0006355|GO:0003700|GO:0005634|GO:0003677|GO:0046872|GO:0006351	38343440	chr10	38343382	+	hs|10p11.1	NM_006954	chr10:38343382-38343440	NM_006954	Hs.435774
A_23_P145761	3.63625	1.86245	3.63625	up	ADP-ribosylation factor-like 4A	ARL4A	FALSE	Homo sapiens ADP-ribosylation factor-like 4A (ARL4A), transcript variant 1, mRNA [NM_005738]	10124	GO:0005515|GO:0005737|GO:0005886|GO:0050873|GO:0007264|GO:0005730|GO:0005634|GO:0005525	12728340	chr7	12728281	+	hs|7p21.3	NM_005738	chr7:12728281-12728340	NM_005738	Hs.245540
A_19_P00330598	3.63507	1.86198	3.63507	up			FALSE				33653268	chr10	33653209	-	hs|10p11.22		chr10:033653268-033653209
A_23_P342185	3.63046	1.86015	3.63046	up	wings apart-like homolog (Drosophila)	WAPAL	FALSE	Homo sapiens wings apart-like homolog (Drosophila) (WAPAL), mRNA [NM_015045]	23063	GO:0005515|GO:0000795|GO:0005694|GO:0005730|GO:0009636|GO:0005634|GO:0071922|GO:0045875|GO:0035562|GO:0043231|GO:0005829|GO:0008278|GO:0005737|GO:0007067|GO:0015630|GO:0016032|GO:0005654|GO:0008156|GO:0071168|GO:0000278|GO:0000785|GO:0000775	88197262	chr10	88197203	-	hs|10q23.2	NM_015045	chr10:88197262-88197203	NM_015045	Hs.203099
A_33_P3420466	3.62619	1.85845	3.62619	up	matrilin 3	MATN3	FALSE	Homo sapiens matrilin 3 (MATN3), mRNA [NM_002381]	4148	GO:0005515|GO:0001501|GO:0030198|GO:0005578|GO:0005576|GO:0005201	20194120	chr2	20194061	-	hs|2p24.1	NM_002381	chr2:20194120-20194061	NM_002381	Hs.656199
A_33_P3228722	3.62077	1.8563	3.62077	up			FALSE	tubulin folding cofactor D [Source:HGNC Symbol;Acc:11581] [ENST00000397466]			80866272	chr17	80866213	+	hs|17q25.3	AL096745	chr17:80866213-80866272		Hs.464391
A_33_P3314574	3.61836	1.85534	3.61836	up			FALSE				7541174	chr6	7541115	+	hs|6p24.3		chr6:007541115-007541174
A_19_P00317519	3.61549	1.85419	3.61549	up	uncharacterized LOC101927043	LOC101927043	FALSE	ALU1_HUMAN (P39188) Alu subfamily J sequence contamination warning entry, partial (20%) [THC2550964]	101927043		47559040	chr2	47558981	-	hs|2p21	TCONS_l2_00015794	chr2:47559040-47558981
A_23_P214080	3.61261	1.85304	3.61261	up	early growth response 1	EGR1	FALSE	Homo sapiens early growth response 1 (EGR1), mRNA [NM_001964]	1958	GO:0005515|GO:0003700|GO:0006366|GO:0048709|GO:0019221|GO:0060291|GO:0042220|GO:0072303|GO:0003690|GO:0043525|GO:0060337|GO:0048169|GO:0051602|GO:0007611|GO:0031667|GO:0035035|GO:0032869|GO:0000976|GO:0030509|GO:0000122|GO:0000979|GO:0071317|GO:0071383|GO:0007623|GO:0005654|GO:0071873|GO:0045893|GO:0008134|GO:0045471|GO:0072110|GO:0005634|GO:0071480|GO:0035914|GO:0046872|GO:0071372|GO:0005737|GO:…	137804950	chr5	137804891	+	hs|5q31.2	NM_001964	chr5:137804891-137804950	NM_001964	Hs.326035
A_23_P501822	3.60832	1.85133	3.60832	up	junction plakoglobin	JUP	FALSE	Homo sapiens junction plakoglobin (JUP), transcript variant 1, mRNA [NM_002230]	3728	GO:0005515|GO:0030057|GO:0030056|GO:0030018|GO:0003181|GO:0090263|GO:0016342|GO:0048599|GO:0042803|GO:0003308|GO:0086069|GO:0016337|GO:0050982|GO:0032993|GO:0042127|GO:0002159|GO:0005856|GO:0086005|GO:0070062|GO:0071665|GO:0045296|GO:0019901|GO:0045294|GO:0019903|GO:0034329|GO:0003713|GO:0000122|GO:0045216|GO:0003136|GO:0009898|GO:0042307|GO:0043588|GO:0034332|GO:0005882|GO:0007369|GO:0005886|GO:…	39911209	chr17	39911150	-	hs|17q21.2	NM_002230	chr17:39911209-39911150	NM_002230	Hs.514174
A_33_P3309911	3.60253	1.84901	3.60253	up	PRAME family member 5	PRAMEF5	FALSE	Homo sapiens PRAME family member 5 (PRAMEF5), mRNA [NM_001013407]	343068	GO:0043066|GO:0008284|GO:0048387|GO:0045596|GO:0042974|GO:0045892	13368978	chr1	13368919	+	hs|1p36.21	NM_001013407	chr1:13368919-13368978	NM_001013407	Hs.567864
A_33_P3242578	3.60121	1.84848	3.60121	up	uncharacterized LOC100506731	LOC100506731	FALSE	PREDICTED: Homo sapiens uncharacterized LOC100506731 (LOC100506731), ncRNA [XR_110231]	100506731		85991599	chr14	85991540	-	hs|14q31.3	XR_110231	chr14:85991599-85991540	XR_110231	Hs.546975
A_33_P3290687	3.59828	1.84731	3.59828	up	DnaJ (Hsp40) homolog, subfamily C, member 1	DNAJC1	FALSE	Homo sapiens DnaJ (Hsp40) homolog, subfamily C, member 1 (DNAJC1), mRNA [NM_022365]	64215	GO:0005515|GO:0031965|GO:0005783|GO:0051087|GO:0032781|GO:0003677|GO:0006417|GO:0045861|GO:0006457|GO:0003682|GO:0005789|GO:0050708|GO:0016021|GO:0001671	22218037	chr10	22217978	-	hs|10p12.31	NM_022365	chr10:22218037-22217978	NM_022365	Hs.499000
A_19_P00812720	3.59751	1.847	3.59751	up			FALSE				80494030	chr15	80493971	+	hs|15q25.1		chr15:080493971-080494030
A_33_P3619171	3.59494	1.84597	3.59494	up	phorbol-12-myristate-13-acetate-induced protein 1	PMAIP1	FALSE	Homo sapiens phorbol-12-myristate-13-acetate-induced protein 1 (PMAIP1), mRNA [NM_021127]	5366	GO:0005515|GO:0043331|GO:0010165|GO:0048147|GO:0005741|GO:0005634|GO:0001836|GO:0010907|GO:0005829|GO:0005739|GO:0051607|GO:1900740|GO:0043525|GO:0090200|GO:0042149|GO:0032461|GO:0043029|GO:0009411|GO:0046902|GO:0043065|GO:0006919|GO:0072593|GO:0071456|GO:0006915|GO:2001244|GO:0097193|GO:0043280|GO:0042771|GO:0010917|GO:0072332|GO:0043517|GO:0010498	57570750	chr18	57570691	+	hs|18q21.32	NM_021127	chr18:57570691-57570750	NM_021127	Hs.96
A_33_P3414689	3.59286	1.84513	3.59286	up			FALSE	Homo sapiens FP15529 mRNA, complete cds. [AF495723]			46936319	chr3	46936260	+	hs|3p21.31	AF495723	chr3:46936260-46936319
A_33_P3372526	3.5909	1.84434	3.5909	up	malate dehydrogenase 1B, NAD (soluble)	MDH1B	FALSE	Homo sapiens malate dehydrogenase 1B, NAD (soluble) (MDH1B), transcript variant 3, non-coding RNA [NR_104261]	130752	GO:0006099|GO:0005975|GO:0016615|GO:0006108|GO:0016616	207606083	chr2	207606024	-	hs|2q33.3	NR_104261	chr2:207606083-207606024	NR_104261	Hs.147816
A_24_P374427	3.59069	1.84426	3.59069	up	zinc finger, DHHC-type containing 21	ZDHHC21	FALSE	Homo sapiens zinc finger, DHHC-type containing 21 (ZDHHC21), mRNA [NM_178566]	340481	GO:0018345|GO:0005794|GO:0005886|GO:0018230|GO:0050999|GO:0044281|GO:0000139|GO:0048733|GO:0016409|GO:0008270|GO:0046209|GO:0016021|GO:0001942|GO:0019706	14617312	chr9	14617253	-	hs|9p22.3	NM_178566	chr9:14617312-14617253	NM_178566	Hs.714266
A_19_P00330027	3.58927	1.84369	3.58927	up			FALSE				39839475	chr14	39839416	-	hs|14q21.1		chr14:039839475-039839416
A_24_P166663	3.58815	1.84324	3.58815	up	cyclin-dependent kinase 6	CDK6	FALSE	Homo sapiens cyclin-dependent kinase 6 (CDK6), transcript variant 1, mRNA [NM_001259]	1021	GO:0005515|GO:0010468|GO:0008285|GO:2000145|GO:0050680|GO:0048699|GO:0005634|GO:0048146|GO:0005829|GO:0005737|GO:0000082|GO:0045638|GO:0007050|GO:0043697|GO:2000773|GO:0021542|GO:0030332|GO:0005730|GO:0003323|GO:0045786|GO:0009615|GO:0005524|GO:0001726|GO:0042063|GO:0045668|GO:0021670|GO:0014002|GO:0000307|GO:0045646|GO:0006468|GO:0045596|GO:0000278|GO:0001954|GO:0051301|GO:0004693	92234502	chr7	92234443	-	hs|7q21.2	NM_001259	chr7:92234502-92234443	NM_001259	Hs.119882
A_24_P588897	3.57326	1.83724	3.57326	up	solute carrier organic anion transporter family, member 3A1	SLCO3A1	FALSE	Homo sapiens solute carrier organic anion transporter family, member 3A1 (SLCO3A1), transcript variant 1, mRNA [NM_013272]	28232	GO:0005215|GO:0005886|GO:0043252|GO:0016021|GO:0055085	92709122	chr15	92709063	+	hs|15q26.1	NM_013272	chr15:92709063-92709122	NM_013272	Hs.311187
A_32_P129527	3.57285	1.83707	3.57285	up	ER membrane-associated RNA degradation	ERMARD	FALSE	Homo sapiens ER membrane-associated RNA degradation (ERMARD), transcript variant 1, mRNA [NM_018341]	55780	GO:0005789|GO:0007275|GO:0016021	170181524	chr6	170181465	+	hs|6q27	NM_018341	chr6:170181465-170181524	NM_018341	Hs.47546
A_32_P144908	3.57054	1.83614	3.57054	up	zinc finger protein 254	ZNF254	FALSE	Homo sapiens zinc finger protein 254 (ZNF254), transcript variant 4, mRNA [NM_203282]	9534	GO:0005634|GO:0000122|GO:0003677|GO:0046872|GO:0006351	24309903	chr19	24309844	+	hs|19p12	NM_203282	chr19:24309844-24309903	NM_203282	Hs.729302
A_33_P3298128	3.56813	1.83517	3.56813	up	inositol 1,4,5-trisphosphate receptor, type 2	ITPR2	FALSE	Homo sapiens inositol 1,4,5-trisphosphate receptor, type 2 (ITPR2), mRNA [NM_002223]	3709	GO:0005886|GO:0007202|GO:0044281|GO:0007173|GO:0006810|GO:0031095|GO:0005938|GO:0001666|GO:0048011|GO:0005220|GO:0048016|GO:0015085|GO:0030168|GO:0033017|GO:0043235|GO:0007165|GO:0071361|GO:0006112|GO:0050796|GO:0008543|GO:0007596|GO:0045087|GO:0070588|GO:0005789|GO:0016021|GO:0071320|GO:0035091|GO:0038096|GO:0038095	26488383	chr12	26488324	-	hs|12p12.1	NM_002223	chr12:26488383-26488324	NM_002223	Hs.512235
A_33_P3349637	3.56812	1.83516	3.56812	up	protocadherin 1	PCDH1	FALSE	Homo sapiens protocadherin 1 (PCDH1), transcript variant 1, mRNA [NM_002587]	5097	GO:0005886|GO:0005911|GO:0005887|GO:0005509|GO:0007267|GO:0007156|GO:0007399	141242277	chr5	141242218	-	hs|5q31.3	NM_002587	chr5:141242277-141242218	NM_002587	Hs.79769
A_33_P3774867	3.5675	1.83491	3.5675	up	DLGAP1 antisense RNA 2	DLGAP1-AS2	FALSE	Homo sapiens cDNA clone IMAGE:30412101. [BC094703]	84777		3607983	chr18	3607924	+	hs|18p11.31	BC094703	chr18:3607924-3607983		Hs.659053
A_23_P418031	3.56514	1.83396	3.56514	up	intermediate filament family orphan 2	IFFO2	FALSE	Homo sapiens intermediate filament family orphan 2 (IFFO2), mRNA [NM_001136265]	126917	GO:0005882|GO:0005198	19230868	chr1	19230809	-	hs|1p36.13	NM_001136265	chr1:19230868-19230809	NM_001136265	Hs.466625
A_33_P3867461	3.56499	1.8339	3.56499	up	testis expressed 41 (non-protein coding)	TEX41	FALSE	Homo sapiens testis expressed 41 (non-protein coding) (TEX41), long non-coding RNA [NR_033870]	401014		145834113	chr2	145834054	+	hs|2q22.3		chr2:145834054-145834113	NR_033870	Hs.742290
A_33_P3382924	3.56104	1.8323	3.56104	up	secreted protein, acidic, cysteine-rich (osteonectin)	SPARC	FALSE	Homo sapiens secreted protein, acidic, cysteine-rich (osteonectin) (SPARC), mRNA [NM_003118]	6678	GO:0005515|GO:0030324|GO:0045471|GO:0005518|GO:0043434|GO:0005634|GO:0033591|GO:0051591|GO:0005615|GO:0007507|GO:0030198|GO:0071682|GO:0042127|GO:0032496|GO:0031093|GO:0034097|GO:0010288|GO:0048839|GO:0005509|GO:0050840|GO:0005578|GO:0030168|GO:0051384|GO:0005576|GO:0005604|GO:0060348|GO:0051592|GO:0007165|GO:0071363|GO:0001503|GO:0009629|GO:0007596|GO:0002576|GO:0046686	151041099	chr5	151041040	-	hs|5q33.1	NM_003118	chr5:151041099-151041040	NM_003118	Hs.111779
A_33_P3420068	3.54712	1.82665	3.54712	up	golgin A7	GOLGA7	FALSE	Homo sapiens golgin A7 (GOLGA7), transcript variant 2, mRNA [NM_001002296]	51125	GO:0005515|GO:0005795|GO:0043001|GO:0018230|GO:0031228|GO:0002178|GO:0050821|GO:0070062	41364625	chr8	41363520	+	hs|8p11.21	NM_001002296	chr8:41363520-41364625	NM_001002296	Hs.654773
A_23_P120316	3.53743	1.8227	3.53743	up	methylenetetrahydrofolate dehydrogenase (NADP+ dependent) 2, methenyltetrahydrofolate cyclohydrolase	MTHFD2	FALSE	Homo sapiens methylenetetrahydrofolate dehydrogenase (NADP+ dependent) 2, methenyltetrahydrofolate cyclohydrolase (MTHFD2), transcript variant 1, mRNA [NM_006636]	10797	GO:0000287|GO:0004329|GO:0004477|GO:0005615|GO:0005829|GO:0005739|GO:0004488|GO:0004487|GO:0042301|GO:0046653|GO:0009396|GO:0006730|GO:0055114	74442044	chr2	74441985	+	hs|2p13.1	NM_006636	chr2:74441985-74442044	NM_006636	Hs.469030
A_23_P420610	3.52558	1.81786	3.52558	up	FCH domain only 2	FCHO2	FALSE	Homo sapiens FCH domain only 2 (FCHO2), transcript variant 1, mRNA [NM_138782]	115548	GO:0072583|GO:0005515|GO:0005905|GO:0005886|GO:0030136|GO:0001786|GO:0005546|GO:0035091|GO:0072659|GO:0010324|GO:0048268	72286369	chr5	72286310	+	hs|5q13.2	NM_138782	chr5:72286310-72286369	NM_138782	Hs.165762
A_33_P3325110	3.52401	1.81722	3.52401	up	SRY (sex determining region Y)-box 13	SOX13	FALSE	Homo sapiens SRY (sex determining region Y)-box 13 (SOX13), mRNA [NM_005686]	9580	GO:0043565|GO:0005515|GO:0006355|GO:0003700|GO:0005634|GO:0009653|GO:0006351	204086317	chr1	204086258	+	hs|1q32.1	NM_005686	chr1:204086258-204086317	NM_005686	Hs.201671
A_19_P00321068	3.52267	1.81667	3.52267	up	myocardial infarction associated transcript (non-protein coding)	MIAT	FALSE	Homo sapiens myocardial infarction associated transcript (non-protein coding) (MIAT), transcript variant 1, long non-coding RNA [NR_003491]	440823		27066318	chr22	27066259	+	hs|22q12.1	NR_003491	chr22:27066259-27066318	NR_003491	Hs.517502
A_24_P335620	3.51896	1.81515	3.51896	up	solute carrier family 7 (amino acid transporter light chain, L system), member 5	SLC7A5	FALSE	Homo sapiens solute carrier family 7 (amino acid transporter light chain, L system), member 5 (SLC7A5), mRNA [NM_003486]	8140	GO:0006520|GO:0005886|GO:0005730|GO:0006865|GO:0005634|GO:0050900|GO:0055085|GO:0030154|GO:0005829|GO:0007399|GO:0015804|GO:0016324|GO:0015171|GO:0007596|GO:0042605|GO:0006810|GO:0015175|GO:0016021|GO:0015179|GO:0070062|GO:0006811	87863966	chr16	87863907	-	hs|16q24.2	NM_003486	chr16:87863966-87863907	NM_003486	Hs.513797
A_24_P330303	3.51746	1.81454	3.51746	up	FERM domain containing 6	FRMD6	FALSE	Homo sapiens FERM domain containing 6 (FRMD6), transcript variant 1, mRNA [NM_001042481]	122786	GO:0043296|GO:0003383|GO:0005737|GO:0032970|GO:0005886|GO:0034613|GO:0005856	52196687	chr14	52196628	+	hs|14q22.1	NM_001042481	chr14:52196628-52196687	NM_001042481	Hs.434914
A_23_P35256	3.51702	1.81435	3.51702	up	polymerase (RNA) III (DNA directed) polypeptide C (62kD)	POLR3C	FALSE	Homo sapiens polymerase (RNA) III (DNA directed) polypeptide C (62kD) (POLR3C), mRNA [NM_006468]	10623	GO:0032728|GO:0010467|GO:0006386|GO:0006385|GO:0003899|GO:0006359|GO:0005730|GO:0005634|GO:0003677|GO:0006383|GO:0005829|GO:0051607|GO:0045089|GO:0001056|GO:0045087|GO:0005666|GO:0032481|GO:0005654	145594972	chr1	145594157	-	hs|1q21.1	NM_006468	chr1:145594972-145594157	NM_006468	Hs.591457
A_23_P126089	3.50911	1.8111	3.50911	up	small proline-rich protein 2C (pseudogene)	SPRR2C	FALSE	Homo sapiens small proline-rich protein 2C (pseudogene) (SPRR2C), non-coding RNA [NR_003062]	6702		153112700	chr1	153112641	-	hs|1q21.3	NR_003062	chr1:153112700-153112641	NR_003062	Hs.2421
A_24_P186346	3.50404	1.80902	3.50404	up	anaphase promoting complex subunit 1	ANAPC1	FALSE	Homo sapiens anaphase promoting complex subunit 1 (ANAPC1), mRNA [NM_022662]	64682	GO:0007094|GO:0007067|GO:0070979|GO:0005680|GO:0051437|GO:0005654|GO:0051436|GO:0000278|GO:0031145|GO:0051439|GO:0005829	112561345	chr2	112561286	-	hs|2q13	NM_022662	chr2:112561345-112561286	NM_022662	Hs.436527
A_23_P65518	3.50264	1.80844	3.50264	up	dishevelled-binding antagonist of beta-catenin 1	DACT1	FALSE	Homo sapiens dishevelled-binding antagonist of beta-catenin 1 (DACT1), transcript variant 1, mRNA [NM_016651]	51339	GO:0005515|GO:0045732|GO:0030054|GO:0008013|GO:0030877|GO:0030178|GO:2000095|GO:0030177|GO:0045202|GO:0005634|GO:0035413|GO:0035412|GO:1900107|GO:0005737|GO:0031647|GO:0046329|GO:0005080|GO:0016055|GO:0051018|GO:0090090|GO:0070097|GO:0005730|GO:2000134|GO:0000122|GO:0001702|GO:0048813|GO:0050808|GO:0048619|GO:0045600	59114772	chr14	59114713	+	hs|14q23.1	NM_016651	chr14:59114713-59114772	NM_016651	Hs.48950
A_33_P3238250	3.49914	1.807	3.49914	up	F11 receptor	F11R	FALSE	Homo sapiens F11 receptor (F11R), mRNA [NM_016946]	50848	GO:0005515|GO:0030054|GO:0005886|GO:0034329|GO:0050900|GO:0045216|GO:0006954|GO:0070830|GO:0005911|GO:0007596|GO:0030198|GO:0030855|GO:0015630|GO:0016032|GO:0007179|GO:0005923|GO:0016021|GO:0007155|GO:0070062	160968009	chr1	160967950	-	hs|1q23.3	NM_016946	chr1:160968009-160967950	NM_016946	Hs.517293
A_19_P00317507	3.4962	1.80579	3.4962	up	MAGI2 antisense RNA 3	MAGI2-AS3	FALSE	Homo sapiens MAGI2 antisense RNA 3 (MAGI2-AS3), transcript variant 2, long non-coding RNA [NR_038344]	100505881		79100366	chr7	79100307	+	hs|7q21.11	NR_038344	chr7:79100307-79100366	NR_038344	Hs.31474
A_19_P00321206	3.49259	1.8043	3.49259	up			FALSE	PREDICTED: Homo sapiens uncharacterized LOC101059946 (LOC101059946), misc_RNA [XR_171346]			208104879	chr2	208104820	+	hs|2q33.3		chr2:208104820-208104879		Hs.678559
A_33_P3301782	3.49226	1.80416	3.49226	up	ZEB1 antisense RNA 1	ZEB1-AS1	FALSE	Homo sapiens ZEB1 antisense RNA 1 (ZEB1-AS1), long non-coding RNA [NR_024284]	220930		31605790	chr10	31605731	-	hs|10p11.22	NR_024284	chr10:31605790-31605731	NR_024284	Hs.372654
A_33_P3305446	3.48841	1.80257	3.48841	up	defensin, beta 121	DEFB121	FALSE	Homo sapiens defensin, beta 121 (DEFB121), transcript variant 1, mRNA [NM_001011878]	245934	GO:0003674|GO:0005576|GO:0042742	29993970	chr20	29993911	-	hs|20q11.21	NM_001011878	chr20:29993970-29993911	NM_001011878	Hs.272294
A_33_P3304668	3.48567	1.80144	3.48567	up	collagen, type I, alpha 1	COL1A1	FALSE	Homo sapiens collagen, type I, alpha 1 (COL1A1), mRNA [NM_000088]	1277	GO:0005515|GO:0042542|GO:0034504|GO:0034505|GO:0071300|GO:0007605|GO:0090263|GO:0048706|GO:0071560|GO:0015031|GO:0050900|GO:0005615|GO:0051591|GO:0042802|GO:0070208|GO:0030198|GO:0030199|GO:0030574|GO:0032355|GO:0030335|GO:0048407|GO:0030168|GO:0031960|GO:0001649|GO:0001501|GO:0001958|GO:0001957|GO:0060346|GO:0005788|GO:0032964|GO:0043589|GO:0045893|GO:0010812|GO:0010718|GO:0043434|GO:0046872|GO:…	48261568	chr17	48261509	-	hs|17q21.33	NM_000088	chr17:48261568-48261509	NM_000088	Hs.172928
A_33_P3417990	3.48394	1.80072	3.48394	up	vaccinia related kinase 2	VRK2	FALSE	Homo sapiens vaccinia related kinase 2 (VRK2), transcript variant 8, mRNA [NM_001288837]	7444	GO:0005515|GO:0031966|GO:0005783|GO:0005634|GO:2000659|GO:0005524|GO:0005737|GO:0046777|GO:0004674|GO:0043408|GO:0005789|GO:0016032|GO:0006468|GO:0016021|GO:0034599	58373607	chr2	58373548	+	hs|2p16.1	NM_001288837	chr2:58373548-58373607	NM_001288837	Hs.744058
A_33_P3312519	3.48373	1.80063	3.48373	up	keratinocyte proline-rich protein	KPRP	FALSE	Homo sapiens keratinocyte proline-rich protein (KPRP), mRNA [NM_001025231]	448834	GO:0005737|GO:0070062	152734527	chr1	152734468	+	hs|1q21.3	NM_001025231	chr1:152734468-152734527	NM_001025231	Hs.149386
A_24_P138713	3.47741	1.79801	3.47741	up	HEAT repeat containing 3	HEATR3	FALSE	Homo sapiens HEAT repeat containing 3 (HEATR3), mRNA [NM_182922]	55027		50138886	chr16	50136324	+	hs|16q12.1	NM_182922	chr16:50136324-50138886	NM_182922	Hs.733027
A_19_P00320525	3.47244	1.79595	3.47244	up	cancer susceptibility candidate 15 (non-protein coding)	CASC15	FALSE	cancer susceptibility candidate 15 (non-protein coding) [Source:HGNC Symbol;Acc:28245] [ENST00000606336]	401237		21910006	chr6	21909947	+	hs|6p22.3	AK310212	chr6:21909947-21910006		Hs.712707
A_23_P346006	3.47159	1.7956	3.47159	up	cell cycle progression 1	CCPG1	FALSE	Homo sapiens cell cycle progression 1 (CCPG1), transcript variant 2, mRNA [NM_020739]	9236	GO:0003674|GO:0008284|GO:0007049|GO:0045944|GO:2001106|GO:0016021|GO:0045787	55648495	chr15	55648436	-	hs|15q21.3	NM_020739	chr15:55648495-55648436	NM_020739	Hs.285051
A_33_P3389578	3.46814	1.79416	3.46814	up			FALSE				4218799	chr12	4218740	-	hs|12p13.32		chr12:004218799-004218740
A_23_P210358	3.46727	1.7938	3.46727	up	LIM and senescent cell antigen-like domains 1	LIMS1	FALSE	Homo sapiens LIM and senescent cell antigen-like domains 1 (LIMS1), transcript variant 2, mRNA [NM_004987]	3987	GO:0005515|GO:0048471|GO:0005886|GO:0034329|GO:0007569|GO:0071560|GO:0008270|GO:0045892|GO:0005925|GO:0005829	109300574	chr2	109300515	+	hs|2q12.3	NM_004987	chr2:109300515-109300574	NM_004987	Hs.597715
A_19_P00810259	3.46281	1.79194	3.46281	up	long intergenic non-protein coding RNA 1158	LINC01158	FALSE	Homo sapiens long intergenic non-protein coding RNA 1158 (LINC01158), long non-coding RNA [NR_037883]	100506421		105424172	chr2	105424113	-	hs|2q12.1	NR_037883	chr2:105424172-105424113	NR_037883	Hs.437281
A_33_P3556532	3.45881	1.79028	3.45881	up	dynein, axonemal, heavy chain 17	DNAH17	FALSE	dynein, axonemal, heavy chain 17 [Source:HGNC Symbol;Acc:2946] [ENST00000587177]	8632	GO:0006200|GO:0001539|GO:0008152|GO:0005874|GO:0005858|GO:0003777|GO:0016887|GO:0005524|GO:0007018	76498343	chr17	76498284	-	hs|17q25.3		chr17:76498343-76498284
A_33_P3222698	3.45806	1.78996	3.45806	up	zinc finger protein 197	ZNF197	FALSE	Homo sapiens zinc finger protein 197 (ZNF197), transcript variant 1, mRNA [NM_006991]	10168	GO:0006355|GO:0003700|GO:0005634|GO:0003677|GO:0046872|GO:0006351	44686737	chr3	44686678	+	hs|3p21.31	NM_006991	chr3:44686678-44686737	NM_006991	Hs.157035
A_32_P34	3.45352	1.78807	3.45352	up	uncharacterized LOC100131581	LOC100131581	FALSE	Homo sapiens cDNA FLJ35225 fis, clone PROST2001116. [AK092544]	100131581		12437959	chr8	12437900	+	hs|8p23.1	AK092544	chr8:12437900-12437959		Hs.638992
A_24_P111054	3.45348	1.78805	3.45348	up	solute carrier family 2 (facilitated glucose/fructose transporter), member 5	SLC2A5	FALSE	solute carrier family 2 (facilitated glucose/fructose transporter), member 5 [Source:HGNC Symbol;Acc:11010] [ENST00000377414]	6518	GO:0005886|GO:0005975|GO:0044281|GO:0055085|GO:0008645|GO:0015755|GO:0016324|GO:0015758|GO:0005353|GO:0016021|GO:0071332|GO:0005355|GO:0070062	9100715	chr1	9100656	-	hs|1p36.23	BC035878	chr1:9100715-9100656		Hs.530003
A_33_P3333642	3.4526	1.78768	3.4526	up			FALSE	Homo sapiens cDNA FLJ16303 fis, clone PROST2019487. [AK131315]			59036408	chr11	59036349	-	hs|11q12.1	AK131315	chr11:59036408-59036349		Hs.533590
A_19_P00332370	3.44372	1.78397	3.44372	up			FALSE				113697287	chr6	113697228	-	hs|6q21		chr6:113697287-113697228
A_33_P3231252	3.43949	1.78219	3.43949	up	nescient helix loop helix 2	NHLH2	FALSE	Homo sapiens nescient helix loop helix 2 (NHLH2), transcript variant 1, mRNA [NM_005599]	4808	GO:0005515|GO:0001102|GO:0005667|GO:0007617|GO:0005634|GO:0042698|GO:0007417|GO:0003677|GO:0006351|GO:0030154|GO:0051091|GO:0045944|GO:0046983	116379373	chr1	116379314	-	hs|1p13.1	NM_005599	chr1:116379373-116379314	NM_005599	Hs.46296
A_23_P25989	3.43811	1.78162	3.43811	up	SET domain containing 3	SETD3	FALSE	Homo sapiens SET domain containing 3 (SETD3), transcript variant 1, mRNA [NM_032233]	84193	GO:0001102|GO:0000790|GO:0003713|GO:0010452|GO:0018027|GO:0018026|GO:0042800|GO:0006351|GO:0018023|GO:0051149|GO:0045944|GO:0046975|GO:0045893|GO:0051568	99865119	chr14	99865060	-	hs|14q32.2	NM_032233	chr14:99865119-99865060	NM_032233	Hs.510407
A_23_P74799	3.43475	1.7802	3.43475	up	solute carrier family 25 (mitochondrial carrier; phosphate carrier), member 24	SLC25A24	FALSE	Homo sapiens solute carrier family 25 (mitochondrial carrier; phosphate carrier), member 24 (SLC25A24), transcript variant 2, mRNA [NM_213651]	29957	GO:0005739|GO:0005737|GO:0005509|GO:0071277|GO:0005743|GO:0015867|GO:0034599|GO:0016021|GO:0005347|GO:0055085|GO:0006839|GO:0010941	108677551	chr1	108677492	-	hs|1p13.3	NM_213651	chr1:108677551-108677492	NM_213651	Hs.656870
A_23_P394448	3.43287	1.77941	3.43287	up	dpy-19-like 1 (C. elegans)	DPY19L1	FALSE	Homo sapiens dpy-19-like 1 (C. elegans) (DPY19L1), mRNA [NM_015283]	23333	GO:0016757|GO:0008152|GO:0016021	34971230	chr7	34971171	-	hs|7p14.3	NM_015283	chr7:34971230-34971171	NM_015283	Hs.408623
A_33_P3419190	3.43037	1.77836	3.43037	up	amphiregulin	AREG	FALSE	Homo sapiens amphiregulin (AREG), mRNA [NM_001657]	374	GO:0005515|GO:0009986|GO:0007186|GO:0007173|GO:0008283|GO:0045740|GO:0007267|GO:0016021|GO:0008083|GO:0005615|GO:0005125	75318352	chr4	75318293	+	hs|4q13.3	NM_001657	chr4:75318293-75318352	NM_001657	Hs.270833
A_33_P3273290	3.42792	1.77733	3.42792	up	zinc finger protein 28	ZNF28	FALSE	zinc finger protein 28 [Source:HGNC Symbol;Acc:13073] [ENST00000464469]	7576	GO:0006355|GO:0003700|GO:0005634|GO:0003677|GO:0046872|GO:0006351	53311236	chr19	53311177	-	hs|19q13.41	BC070146	chr19:53311236-53311177		Hs.732407
A_19_P00811234	3.42707	1.77698	3.42707	up			FALSE				48554173	chr18	48554114	+	hs|18q21.2		chr18:048554114-048554173
A_24_P112087	3.42183	1.77477	3.42183	up	anti-silencing function 1A histone chaperone	ASF1A	FALSE	Homo sapiens anti-silencing function 1A histone chaperone (ASF1A), mRNA [NM_014034]	25842	GO:0005515|GO:0000790|GO:0006334|GO:0006335|GO:0005634|GO:0006336|GO:0001649|GO:0006351|GO:0042692|GO:0043234|GO:0042393|GO:0006281|GO:0003682|GO:0005654|GO:0016568|GO:0031936	119229541	chr6	119229482	+	hs|6q22.31	NM_014034	chr6:119229482-119229541	NM_014034	Hs.292316
A_24_P58037	3.41655	1.77254	3.41655	up	microtubule-associated protein 1 light chain 3 beta pseudogene 1	MAP1LC3BP1	FALSE	PREDICTED: Homo sapiens microtubule-associated proteins 1A/1B light chain 3B-like (LOC392288), mRNA [XM_001716795]	392288		19461168	chr9	19461109	-	hs|9p22.1	XM_001716795	chr9:19461168-19461109	XM_001716795
A_19_P00328583	3.41502	1.77189	3.41502	up			FALSE				203171595	chr1	203171536	+	hs|1q32.1		chr1:203171536-203171595
A_33_P3399090	3.41473	1.77177	3.41473	up	DIX domain containing 1	DIXDC1	FALSE	Homo sapiens DIX domain containing 1 (DIXDC1), transcript variant 1, mRNA [NM_001037954]	85458	GO:0005515|GO:0043015|GO:0021695|GO:0090263|GO:0003779|GO:0031435|GO:0005829|GO:0046328|GO:0043025|GO:0043010|GO:0043679|GO:0050772|GO:0004871|GO:0030900|GO:0005925|GO:0005938|GO:0060071	111893275	chr11	111893216	+	hs|11q23.1	NM_001037954	chr11:111893216-111893275	NM_001037954	Hs.655626
A_33_P3223759	3.41464	1.77173	3.41464	up	mediator complex subunit 13	MED13	FALSE	Homo sapiens mediator complex subunit 13 (MED13), mRNA [NM_005121]	9969	GO:0003712|GO:0010467|GO:0001104|GO:0006367|GO:0003713|GO:0005634|GO:0046966|GO:0030374|GO:0030518|GO:0042809|GO:0045944|GO:0016592|GO:0004872|GO:0005654|GO:0045893|GO:0030521	60020094	chr17	60020035	-	hs|17q23.2	NM_005121	chr17:60020094-60020035	NM_005121	Hs.282678
A_19_P00315524	3.41094	1.77017	3.41094	up	myocardial infarction associated transcript (non-protein coding)	MIAT	FALSE	Homo sapiens myocardial infarction associated transcript (non-protein coding) (MIAT), transcript variant 1, long non-coding RNA [NR_003491]	440823		27066445	chr22	27066386	+	hs|22q12.1	NR_003491	chr22:27066386-27066445	NR_003491	Hs.517502
A_32_P150391	3.41091	1.77016	3.41091	up	chromosome 17 open reading frame 100	C17orf100	FALSE	Homo sapiens chromosome 17 open reading frame 100 (C17orf100), mRNA [NM_001105520]	388327		6556063	chr17	6556004	+	hs|17p13.1	NM_001105520	chr17:6556004-6556063	NM_001105520	Hs.262480
A_23_P30363	3.40881	1.76927	3.40881	up	prolyl 4-hydroxylase, alpha polypeptide II	P4HA2	FALSE	Homo sapiens prolyl 4-hydroxylase, alpha polypeptide II (P4HA2), transcript variant 1, mRNA [NM_004199]	8974	GO:0005737|GO:0031418|GO:0005506|GO:0005783|GO:0018401|GO:0009055|GO:0005788|GO:0005634|GO:0004656|GO:0016702|GO:0055114|GO:0043231	131528367	chr5	131528308	-	hs|5q31.1	NM_004199	chr5:131528367-131528308	NM_004199	Hs.519568
A_23_P81590	3.40747	1.7687	3.40747	up	phosphodiesterase 6A, cGMP-specific, rod, alpha	PDE6A	FALSE	Homo sapiens phosphodiesterase 6A, cGMP-specific, rod, alpha (PDE6A), mRNA [NM_000440]	5145	GO:0060041|GO:0007603|GO:0005886|GO:0051480|GO:0047555|GO:0046037|GO:0022400|GO:0007601|GO:0046872|GO:0016056	149240372	chr5	149240313	-	hs|5q32	NM_000440	chr5:149240372-149240313	NM_000440	Hs.567314
A_23_P69670	3.40614	1.76814	3.40614	up	biogenesis of lysosomal organelles complex-1, subunit 4, cappuccino	BLOC1S4	FALSE	Homo sapiens biogenesis of lysosomal organelles complex-1, subunit 4, cappuccino (BLOC1S4), mRNA [NM_018366]	55330	GO:0070527|GO:0005515|GO:0048490|GO:0005737|GO:0031083|GO:0032438|GO:0050885|GO:0006892|GO:0061024|GO:0008089|GO:0031175|GO:0005829	6719120	chr4	6719061	+	hs|4p16.1	NM_018366	chr4:6719061-6719120	NM_018366	Hs.7570
A_23_P150053	3.40383	1.76716	3.40383	up	actin, alpha 2, smooth muscle, aorta	ACTA2	FALSE	Homo sapiens actin, alpha 2, smooth muscle, aorta (ACTA2), transcript variant 2, mRNA [NM_001613]	59	GO:0019901|GO:0009615|GO:0015629|GO:0005524|GO:0005615|GO:0005829|GO:0014829|GO:0030485|GO:0043234|GO:0005737|GO:0006936|GO:0008217|GO:0072144	90697958	chr10	90697899	-	hs|10q23.31	NM_001613	chr10:90697958-90697899	NM_001613	Hs.500483
A_23_P423695	3.40134	1.7661	3.40134	up	MAX dimerization protein 4	MXD4	FALSE	Homo sapiens MAX dimerization protein 4 (MXD4), mRNA [NM_006454]	10608	GO:0008285|GO:0003714|GO:0046983|GO:0005634|GO:0000122|GO:0003677|GO:0006351	2251339	chr4	2251280	-	hs|4p16.3	NM_006454	chr4:2251339-2251280	NM_006454	Hs.655020
A_24_P349466	3.39816	1.76475	3.39816	up	proline rich 13	PRR13	FALSE	Homo sapiens proline rich 13 (PRR13), transcript variant 3, mRNA [NM_001005354]	54458	GO:0006355|GO:0005634|GO:0006351	53837527	chr12	53837468	+	hs|12q13.13	NM_001005354	chr12:53837468-53837527	NM_001005354	Hs.744894
A_33_P3397865	3.39771	1.76456	3.39771	up	troponin T type 1 (skeletal, slow)	TNNT1	FALSE	Homo sapiens troponin T type 1 (skeletal, slow) (TNNT1), transcript variant 4, mRNA [NM_001291774]	7138	GO:0031014|GO:0045932|GO:0030049|GO:0005861|GO:0003009|GO:0031444|GO:0005523|GO:0005829	55644255	chr19	55644196	-	hs|19q13.42	NM_001291774	chr19:55644255-55644196	NM_001291774	Hs.631558
A_24_P98161	3.39327	1.76267	3.39327	up	KRIT1, ankyrin repeat containing	KRIT1	FALSE	Homo sapiens KRIT1, ankyrin repeat containing (KRIT1), transcript variant 4, mRNA [NM_194455]	889	GO:0005515|GO:0008017|GO:0005886|GO:0007264|GO:0005874|GO:2000114|GO:0005546|GO:0001525|GO:0032403|GO:0005615|GO:0032092|GO:0010596|GO:0050790|GO:0005083|GO:0005737|GO:0001937|GO:0005911|GO:0016525|GO:0045454|GO:2000352	91828674	chr7	91828615	-	hs|7q21.2	NM_194455	chr7:91828674-91828615	NM_194455	Hs.531987
A_33_P3367970	3.39251	1.76235	3.39251	up			FALSE				112054745	chr11	112054686	+	hs|11q23.1		chr11:112054686-112054745
A_23_P341503	3.39218	1.76221	3.39218	up	chromosome 3 open reading frame 35	C3orf35	FALSE	Homo sapiens chromosome 3 open reading frame 35 (C3orf35), transcript variant B, mRNA [NM_178339]	339883	GO:0016021	37441127	chr3	37441068	+	hs|3p22.2	NM_178339	chr3:37441068-37441127	NM_178339	Hs.475945
A_23_P119478	3.392	1.76214	3.392	up	Epstein-Barr virus induced 3	EBI3	FALSE	Homo sapiens Epstein-Barr virus induced 3 (EBI3), mRNA [NM_005755]	10148	GO:0005515|GO:0004896|GO:0005886|GO:0045078|GO:0006959|GO:0019221|GO:0046641|GO:0045523|GO:0042088|GO:0005615|GO:0005125	4237319	chr19	4237260	+	hs|19p13.3	NM_005755	chr19:4237260-4237319	NM_005755	Hs.501452
A_19_P00318719	3.38715	1.76007	3.38715	up			FALSE	Homo sapiens cDNA FLJ33738 fis, clone BRAWH2018527. [AK091057]			8357157	chr4	8357098	-	hs|4p16.1	AK091057	chr4:8357157-8357098		Hs.400256
A_24_P940803	3.38356	1.75854	3.38356	up	ethanolaminephosphotransferase 1 (CDP-ethanolamine-specific)	EPT1	FALSE	Homo sapiens ethanolaminephosphotransferase 1 (CDP-ethanolamine-specific) (EPT1), mRNA [NM_033505]	85465	GO:0006646|GO:0004307|GO:0005789|GO:0044281|GO:0016021|GO:0006644|GO:0046872|GO:0046474	26618510	chr2	26618451	+	hs|2p23.3	NM_033505	chr2:26618451-26618510	NM_033505	Hs.189073
A_33_P3327270	3.37524	1.75499	3.37524	up	TMED7-TICAM2 readthrough	TMED7-TICAM2	FALSE	Homo sapiens TMED7-TICAM2 readthrough (TMED7-TICAM2), transcript variant 2, mRNA [NM_001164469]	100302736		114915373	chr5	114915314	-	hs|5q22.3	NM_001164469	chr5:114915373-114915314	NM_001164469	Hs.718838
A_19_P00801634	3.37259	1.75386	3.37259	up	NOP56 ribonucleoprotein	NOP56	FALSE	Homo sapiens NOP56 ribonucleoprotein (NOP56), transcript variant 1, mRNA [NM_006392]	10528	GO:0005515|GO:0008219|GO:0005737|GO:0030515|GO:0031428|GO:0006364|GO:0003723|GO:0070761|GO:0005730|GO:0005732|GO:0005654	2638618	chr20	2637849	+	hs|20p13	NM_006392	chr20:2637849-2638618	NM_006392	Hs.376064
A_23_P82868	3.3724	1.75377	3.3724	up	plasminogen activator, tissue	PLAT	FALSE	Homo sapiens plasminogen activator, tissue (PLAT), transcript variant 1, mRNA [NM_000930]	5327	GO:0005515|GO:0004252|GO:0043434|GO:0045202|GO:0005615|GO:0051591|GO:0005737|GO:0048167|GO:0006508|GO:0030141|GO:0070062|GO:0001666|GO:0009986|GO:0035249|GO:0014909|GO:0045177|GO:0005576|GO:0051384|GO:0045861|GO:0031012|GO:0007596|GO:0031639|GO:0048008|GO:0042730|GO:0006464|GO:0060279	42032871	chr8	42032812	-	hs|8p11.21	NM_000930	chr8:42032871-42032812	NM_000930	Hs.491582
A_33_P3258392	3.37177	1.75351	3.37177	up	endothelin 1	EDN1	FALSE	Homo sapiens endothelin 1 (EDN1), transcript variant 1, mRNA [NM_001955]	1906	GO:0005515|GO:0019722|GO:0005615|GO:0006885|GO:0019229|GO:0007507|GO:0001516|GO:0014032|GO:0015758|GO:0032496|GO:0003100|GO:0031583|GO:0030335|GO:0043179|GO:0030593|GO:0045840|GO:0000122|GO:0001701|GO:0005125|GO:0014065|GO:0032269|GO:0010595|GO:0045793|GO:0045321|GO:0007186|GO:0005179|GO:0035815|GO:0016049|GO:0010460|GO:0035810|GO:0030072|GO:0008284|GO:0042482|GO:0030818|GO:0007267|GO:0010259|GO:…	12296277	chr6	12296218	+	hs|6p24.1	NM_001955	chr6:12296218-12296277	NM_001955	Hs.511899
A_23_P25684	3.37009	1.75279	3.37009	up	retinol dehydrogenase 11 (all-trans/9-cis/11-cis)	RDH11	FALSE	Homo sapiens retinol dehydrogenase 11 (all-trans/9-cis/11-cis) (RDH11), transcript variant 1, mRNA [NM_016026]	51109	GO:0005622|GO:0016062|GO:0001917|GO:0007603|GO:0042574|GO:0042572|GO:0005789|GO:0016021|GO:0052650|GO:0004745|GO:0001523|GO:0055114	68144288	chr14	68144229	-	hs|14q24.1	NM_016026	chr14:68144288-68144229	NM_016026	Hs.719925
A_24_P330773	3.36425	1.75029	3.36425	up	calcium binding and coiled-coil domain 2	CALCOCO2	FALSE	Homo sapiens calcium binding and coiled-coil domain 2 (CALCOCO2), transcript variant 3, mRNA [NM_005831]	10241	GO:0005515|GO:0048471|GO:0005737|GO:0005794|GO:0016032|GO:0005634|GO:0034341|GO:0005856|GO:0042803|GO:0043231	46941983	chr17	46941924	+	hs|17q21.32	NM_005831	chr17:46941924-46941983	NM_005831	Hs.514920
A_33_P3211604	3.36254	1.74955	3.36254	up	RAP1B, member of RAS oncogene family	RAP1B	FALSE	Homo sapiens RAP1B, member of RAS oncogene family (RAP1B), transcript variant 1, mRNA [NM_015646]	5908	GO:0005515|GO:0005811|GO:0032486|GO:0005886|GO:0008283|GO:2000114|GO:0003924|GO:0030168|GO:0044281|GO:0005525|GO:0032403|GO:0005829|GO:0005622|GO:0006184|GO:0006112|GO:0050796|GO:0016020|GO:0061028|GO:0005911|GO:0007596|GO:0071320|GO:0019003|GO:0070062	69054242	chr12	69054183	+	hs|12q15	NM_015646	chr12:69054183-69054242	NM_015646	Hs.369920
A_24_P878388	3.36202	1.74933	3.36202	up			FALSE				6907820	chrX	6907761	+	hs|Xp22.31		chrX:006907761-006907820
A_23_P21134	3.35992	1.74843	3.35992	up	DNA-damage-inducible transcript 3	DDIT3	FALSE	Homo sapiens DNA-damage-inducible transcript 3 (DDIT3), transcript variant 5, mRNA [NM_004083]	1649	GO:0006986|GO:0005515|GO:0034976|GO:0006983|GO:0003700|GO:0005634|GO:0043620|GO:0045662|GO:0032757|GO:0043433|GO:0030968|GO:0042594|GO:0043525|GO:0045944|GO:0007050|GO:0042789|GO:0016055|GO:0090090|GO:0006355|GO:0051209|GO:2000016|GO:0005770|GO:0003714|GO:0044324|GO:0003677|GO:0006974|GO:0043565|GO:0070059|GO:0045454|GO:0005654|GO:0043161|GO:0045893|GO:0006987|GO:0045892|GO:0044267|GO:0001955|GO:…	57911526	chr12	57911200	-	hs|12q13.3	NM_004083	chr12:57911526-57911200	NM_004083	Hs.505777
A_23_P34548	3.35949	1.74824	3.35949	up	serologically defined colon cancer antigen 8	SDCCAG8	FALSE	Homo sapiens serologically defined colon cancer antigen 8 (SDCCAG8), mRNA [NM_006642]	10806	GO:0005515|GO:0005813|GO:0005911|GO:0005814|GO:0035148|GO:0000086|GO:0030010|GO:0000278|GO:0005829	243581354	chr1	243581295	+	hs|1q43	NM_006642	chr1:243581295-243581354	NM_006642	Hs.591530
A_33_P3395028	3.35285	1.74539	3.35285	up	uncharacterized LOC152225	LOC152225	FALSE	Homo sapiens uncharacterized LOC152225 (LOC152225), long non-coding RNA [NR_026934]	152225		101716635	chr3	101716576	+	hs|3q12.3		chr3:101716576-101716635	NR_026934	Hs.376768
A_24_P152094	3.34978	1.74406	3.34978	up	peptidyl-prolyl cis-trans isomerase A-like	LOC101060458	FALSE	PREDICTED: Homo sapiens peptidyl-prolyl cis-trans isomerase A-like (LOC101060458), mRNA [XM_003960530]	101060458		53394841	chr13	53394782	+	hs|13q14.3	XM_003960530	chr13:53394782-53394841	XM_003960530
A_33_P3647427	3.34476	1.7419	3.34476	up	zinc finger protein 29, pseudogene	ZNF29P	FALSE	Human Kox26 mRNA for zinc finger protein, partial. [X52357]	7577		15578894	chr17	15578835	+	hs|17p12	X52357	chr17:15578835-15578894		Hs.684886
A_23_P83818	3.34413	1.74163	3.34413	up	collagen, type V, alpha 1	COL5A1	FALSE	Homo sapiens collagen, type V, alpha 1 (COL5A1), transcript variant 1, mRNA [NM_000093]	1289	GO:0035313|GO:0048592|GO:0005588|GO:0035989|GO:0046872|GO:0022617|GO:0007411|GO:0030198|GO:0030199|GO:0030574|GO:0045112|GO:0043206|GO:0007155|GO:0008201|GO:0070062|GO:0001568|GO:0048407|GO:0043394|GO:0005576|GO:0005604|GO:0031012|GO:0003007|GO:0005178|GO:0016477|GO:0051128|GO:0005788|GO:0043588|GO:0032964|GO:0005201	137734122	chr9	137734063	+	hs|9q34.3	NM_000093	chr9:137734063-137734122	NM_000093	Hs.210283
A_33_P3374215	3.33096	1.73594	3.33096	up			FALSE				144917504	chr1	144917445	-	hs|1q21.1		chr1:144917504-144917445
A_33_P3417950	3.33027	1.73564	3.33027	up	A kinase (PRKA) anchor protein 8	AKAP8	FALSE	Homo sapiens A kinase (PRKA) anchor protein 8 (AKAP8), mRNA [NM_005858]	10270	GO:0000793|GO:0007076|GO:0034237|GO:0005794|GO:0005730|GO:0005634|GO:0016363|GO:0005739|GO:0007165|GO:0007067|GO:0001939|GO:0003690|GO:0008270	15464414	chr19	15464355	-	hs|19p13.12	NM_005858	chr19:15464414-15464355	NM_005858	Hs.594496
A_23_P99204	3.32871	1.73496	3.32871	up	MAPKAPK5 antisense RNA 1	MAPKAPK5-AS1	FALSE	Homo sapiens MAPKAPK5 antisense RNA 1 (MAPKAPK5-AS1), long non-coding RNA [NR_015404]	51275		112278006	chr12	112277947	-	hs|12q24.12	NR_015404	chr12:112278006-112277947	NR_015404	Hs.333120
A_24_P269814	3.32836	1.73481	3.32836	up	pleckstrin homology domain containing, family A (phosphoinositide binding specific) member 1	PLEKHA1	FALSE	Homo sapiens pleckstrin homology domain containing, family A (phosphoinositide binding specific) member 1 (PLEKHA1), transcript variant 2, mRNA [NM_001001974]	59338	GO:0005515|GO:0050853|GO:0051898|GO:0070301|GO:0005886|GO:0001553|GO:0048705|GO:0005634|GO:0007283|GO:0009791|GO:0031529|GO:0045184|GO:0005737|GO:0035264|GO:0060021|GO:0070062|GO:0008209|GO:0043325|GO:0005730|GO:0032587|GO:0030165|GO:0014065|GO:0008210|GO:0060325|GO:0033327|GO:0048008	124191857	chr10	124191798	+	hs|10q26.13	NM_001001974	chr10:124191798-124191857	NM_001001974	Hs.643512
A_32_P14843	3.32182	1.73197	3.32182	up	nuclear pore complex interacting protein family, member B15	NPIPB15	FALSE	nuclear pore complex interacting protein family, member B15 [Source:HGNC Symbol;Acc:34409] [ENST00000429990]	440348	GO:0005576	74425578	chr16	74425519	+	hs|16q23.1	XM_005256273	chr16:74425519-74425578	XM_005256273	Hs.513695
A_32_P62963	3.32176	1.73195	3.32176	up	keratin 16 pseudogene 2	KRT16P2	FALSE	Homo sapiens keratin 16 pseudogene 2 (KRT16P2), non-coding RNA [NR_029392]	400578		16734545	chr17	16734486	-	hs|17p11.2	NR_029392	chr17:16734545-16734486	NR_029392	Hs.723586
A_23_P200741	3.31935	1.7309	3.31935	up	dermatopontin	DPT	FALSE	Homo sapiens dermatopontin (DPT), mRNA [NM_001937]	1805	GO:0031012|GO:0008285|GO:0030199|GO:0005578|GO:0007155|GO:0005615|GO:0070062	168664807	chr1	168664748	-	hs|1q24.2	NM_001937	chr1:168664807-168664748	NM_001937	Hs.80552
A_33_P3285444	3.31728	1.73	3.31728	up	telomeric repeat binding factor (NIMA-interacting) 1	TERF1	FALSE	Homo sapiens telomeric repeat binding factor (NIMA-interacting) 1 (TERF1), transcript variant 1, mRNA [NM_017489]	7013	GO:0051974|GO:0005515|GO:0008017|GO:0007094|GO:0010834|GO:0005634|GO:0042803|GO:0005737|GO:0003691|GO:0032211|GO:0000723|GO:0000086|GO:0032214|GO:0051260|GO:0000783|GO:0000781|GO:0031116|GO:0043065|GO:0046982|GO:0008301|GO:0042493|GO:0042162|GO:0005730|GO:0005819|GO:0045840|GO:0003677|GO:0001309|GO:0045931|GO:0007067|GO:0003682|GO:0005654|GO:0008156|GO:0007004	73959805	chr8	73959745	+	hs|8q21.11	NM_017489	chr8:73959745-73959805	NM_017489	Hs.442707
A_23_P404162	3.3118	1.72762	3.3118	up	histone deacetylase 9	HDAC9	FALSE	Homo sapiens histone deacetylase 9 (HDAC9), transcript variant 3, mRNA [NM_014707]	9734	GO:0005515|GO:0042826|GO:0046970|GO:0005634|GO:0046872|GO:0007507|GO:0005737|GO:0006954|GO:0007219|GO:0070491|GO:0005080|GO:0030183|GO:0051153|GO:0090050|GO:0004407|GO:0046969|GO:0032041|GO:0070932|GO:0005667|GO:0070933|GO:0016575|GO:0032869|GO:0034983|GO:0003714|GO:0048742|GO:0000122|GO:0006351|GO:0033558|GO:0042113|GO:0035097|GO:0000118|GO:0005654|GO:0045892|GO:0008134	18708061	chr7	18708002	+	hs|7p21.1	NM_014707	chr7:18708002-18708061	NM_014707	Hs.196054
A_23_P143559	3.30842	1.72614	3.30842	up	clathrin, heavy chain-like 1	CLTCL1	FALSE	Homo sapiens clathrin, heavy chain-like 1 (CLTCL1), transcript variant 1, mRNA [NM_007098]	8218	GO:0005515|GO:0005802|GO:0030132|GO:0030135|GO:0030136|GO:0005819|GO:0006886|GO:0009653|GO:0006898|GO:0007165|GO:0005905|GO:0007067|GO:0005198|GO:0046326|GO:0030130|GO:0004871	19167335	chr22	19167276	-	hs|22q11.21	NM_007098	chr22:19167335-19167276	NM_007098	Hs.368266
A_33_P3386716	3.30825	1.72607	3.30825	up	protein phosphatase 1, regulatory subunit 15B	PPP1R15B	FALSE	Homo sapiens protein phosphatase 1, regulatory subunit 15B (PPP1R15B), mRNA [NM_032833]	84919	GO:0005515|GO:0042542|GO:0006983|GO:0016311|GO:0000164|GO:0004722|GO:0006417	204372653	chr1	204372594	-	hs|1q32.1	NM_032833	chr1:204372653-204372594	NM_032833	Hs.304376
A_19_P00813140	3.29922	1.72212	3.29922	up	long intergenic non-protein coding RNA 313	LINC00313	FALSE	long intergenic non-protein coding RNA 313 [Source:HGNC Symbol;Acc:16416] [ENST00000427188]	114038		44890611	chr21	44890552	-	hs|21q22.3	XR_425284	chr21:44890611-44890552	XR_425284	Hs.592161
A_33_P3363245	3.29549	1.7205	3.29549	up	neurexophilin 4	NXPH4	FALSE	Homo sapiens neurexophilin 4 (NXPH4), mRNA [NM_007224]	11247	GO:0003674|GO:0007218|GO:0005576|GO:0005575	57620226	chr12	57620167	+	hs|12q13.3	NM_007224	chr12:57620167-57620226	NM_007224	Hs.745023
A_23_P92154	3.29459	1.7201	3.29459	up	methyl-CpG binding domain protein 4	MBD4	FALSE	Homo sapiens methyl-CpG binding domain protein 4 (MBD4), transcript variant 1, mRNA [NM_003925]	8930	GO:0009314|GO:0005515|GO:0007095|GO:0008630|GO:0004520|GO:0005730|GO:0005634|GO:0005737|GO:0006281|GO:0003696|GO:0006284|GO:0045008|GO:0006285|GO:0005654|GO:0008263|GO:0000737|GO:0000785	129150389	chr3	129150330	-	hs|3q21.3	NM_003925	chr3:129150389-129150330	NM_003925	Hs.35947
A_33_P3259736	3.29355	1.71964	3.29355	up	alpha-methylacyl-CoA racemase	AMACR	FALSE	Homo sapiens alpha-methylacyl-CoA racemase (AMACR), transcript variant 1, mRNA [NM_014324]	23600	GO:0005739|GO:0005737|GO:0005782|GO:0006699|GO:0005102|GO:0008206|GO:0044281|GO:0033540|GO:0008111|GO:0044255|GO:0005777	33988020	chr5	33987961	-	hs|5p13.2	NM_014324	chr5:33988020-33987961	NM_014324	Hs.508343
A_24_P153576	3.2914	1.7187	3.2914	up	SNF2 histone linker PHD RING helicase, E3 ubiquitin protein ligase	SHPRH	FALSE	Homo sapiens SNF2 histone linker PHD RING helicase, E3 ubiquitin protein ligase (SHPRH), transcript variant 2, mRNA [NM_173082]	257218	GO:0000209|GO:0004842|GO:0006281|GO:0016874|GO:0006334|GO:0004386|GO:0008270|GO:0005634|GO:0000786|GO:0005524|GO:0003677	146266660	chr6	146266601	-	hs|6q24.3	NM_173082	chr6:146266660-146266601	NM_173082	Hs.723297
A_32_P148796	3.28788	1.71716	3.28788	up	UBX domain protein 2B	UBXN2B	FALSE	Homo sapiens UBX domain protein 2B (UBXN2B), mRNA [NM_001077619]	137886	GO:0005794|GO:0005783|GO:0005634|GO:0005829	59363841	chr8	59363782	+	hs|8q12.1	NM_001077619	chr8:59363782-59363841	NM_001077619	Hs.155572
A_23_P253958	3.28079	1.71404	3.28079	up	leucine rich repeat containing 17	LRRC17	FALSE	Homo sapiens leucine rich repeat containing 17 (LRRC17), transcript variant 2, mRNA [NM_005824]	10234	GO:0033687|GO:0045671|GO:0048539|GO:0005615|GO:0001649	102584885	chr7	102584826	+	hs|7q22.1	NM_005824	chr7:102584826-102584885	NM_005824	Hs.567412
A_24_P691826	3.27883	1.71318	3.27883	up	WDNM1-like pseudogene	LOC645638	FALSE		645638		58162479	chr17	58161084	-	hs|17q23.1	TCONS_00025714	chr17:58162479-58161084
A_19_P00331348	3.27862	1.71309	3.27862	up			FALSE				68239051	chrX	68238992	-	hs|Xq13.1		chrX:068239051-068238992
A_24_P217904	3.27287	1.71056	3.27287	up	transcriptional regulating factor 1	TRERF1	FALSE	Homo sapiens transcriptional regulating factor 1 (TRERF1), mRNA [NM_033502]	55809	GO:0006694|GO:0006707|GO:0001104|GO:0003700|GO:0006357|GO:0006366|GO:0008301|GO:0005730|GO:0042592|GO:0005634|GO:0007275|GO:0046872|GO:0005737|GO:0030374|GO:0046885|GO:0003682|GO:0045893|GO:0008134	42193530	chr6	42193471	-	hs|6p21.1	NM_033502	chr6:42193530-42193471	NM_033502	Hs.485392
A_23_P160582	3.26843	1.7086	3.26843	up	hydroxypyruvate isomerase (putative)	HYI	FALSE	Homo sapiens hydroxypyruvate isomerase (putative) (HYI), transcript variant 1, mRNA [NM_031207]	81888	GO:0008150|GO:0003674|GO:0008903|GO:0008152|GO:0005575	43917493	chr1	43917354	-	hs|1p34.2	NM_031207	chr1:43917493-43917354	NM_031207	Hs.709864
A_19_P00331381	3.26208	1.70579	3.26208	up			FALSE				1037218	chr4	1037159	-	hs|4p16.3		chr4:001037218-001037159
A_23_P342727	3.25786	1.70392	3.25786	up	StAR-related lipid transfer (START) domain containing 13	STARD13	FALSE	Homo sapiens StAR-related lipid transfer (START) domain containing 13 (STARD13), transcript variant 1, mRNA [NM_178006]	90627	GO:0043547|GO:0005811|GO:0005515|GO:0051056|GO:0031966|GO:0007264|GO:0008289|GO:0005829|GO:0005096	33678315	chr13	33678256	-	hs|13q13.1	NM_178006	chr13:33678315-33678256	NM_178006	Hs.507704
A_23_P113701	3.25754	1.70378	3.25754	up	platelet-derived growth factor alpha polypeptide	PDGFA	FALSE	Homo sapiens platelet-derived growth factor alpha polypeptide (PDGFA), transcript variant 1, mRNA [NM_002607]	5154	GO:0005515|GO:0050730|GO:0005518|GO:0009790|GO:0005615|GO:0042803|GO:0010035|GO:0007173|GO:0030198|GO:0032956|GO:0009887|GO:0051781|GO:0007179|GO:0070374|GO:0001942|GO:0032355|GO:0035793|GO:0048839|GO:0060683|GO:0030335|GO:0048286|GO:0046982|GO:0009986|GO:0048407|GO:0045740|GO:0010512|GO:0030168|GO:0014068|GO:0005161|GO:0008543|GO:0030031|GO:0045087|GO:0042060|GO:0005788|GO:0043588|GO:0008083|GO:…	536988	chr7	536929	-	hs|7p22.3	NM_002607	chr7:536988-536929	NM_002607	Hs.535898
A_33_P3280355	3.25694	1.70352	3.25694	up			FALSE				16492298	chrX	16492239	-	hs|Xp22.2		chrX:016492298-016492239
A_23_P363769	3.25191	1.70129	3.25191	up	keratin 86	KRT86	FALSE	Homo sapiens keratin 86 (KRT86), mRNA [NM_002284]	3892	GO:0005198|GO:0045095|GO:0005615|GO:0070062	52702897	chr12	52702840	+	hs|12q13.13	NM_002284	chr12:52702840-52702897	NM_002284	Hs.278658
A_24_P53051	3.24858	1.69981	3.24858	up	lactamase, beta	LACTB	FALSE	Homo sapiens lactamase, beta (LACTB), transcript variant 2, mRNA [NM_171846]	114294	GO:0005739|GO:0005737|GO:0016787|GO:0008152	63421800	chr15	63421741	+	hs|15q22.2	NM_171846	chr15:63421741-63421800	NM_171846	Hs.410388
A_32_P157481	3.24858	1.69981	3.24858	up	excision repair cross-complementation group 4	ERCC4	FALSE	Homo sapiens excision repair cross-complementation group 4 (ERCC4), mRNA [NM_005236]	2072	GO:0005515|GO:0009650|GO:0010834|GO:0000110|GO:0005634|GO:0000109|GO:0003697|GO:0000723|GO:0006295|GO:0000724|GO:0006296|GO:0009411|GO:0000784|GO:0000781|GO:0005669|GO:0001094|GO:0004520|GO:0008022|GO:0003684|GO:0047485|GO:0006281|GO:0006283|GO:0000712|GO:0043566|GO:0000014|GO:0032205|GO:0005654|GO:0006289|GO:0000718|GO:0000737|GO:0033683	14046105	chr16	14046046	+	hs|16p13.12	NM_005236	chr16:14046046-14046105	NM_005236	Hs.567265
A_24_P281801	3.24624	1.69877	3.24624	up	zinc finger protein 732	ZNF732	FALSE	Homo sapiens zinc finger protein 732 (ZNF732), mRNA [NM_001137608]	654254	GO:0006355|GO:0005634|GO:0003677|GO:0046872|GO:0006351	265611	chr4	265552	-	hs|4p16.3	NM_001137608	chr4:265611-265552	NM_001137608	Hs.698668
A_24_P204204	3.24479	1.69813	3.24479	up			FALSE				100431524	chr14	100431463	+	hs|14q32.2		chr14:100431463-100431524
A_19_P00327193	3.24192	1.69685	3.24192	up			FALSE				131799451	chr5	131799392	-	hs|5q31.1		chr5:131799451-131799392
A_19_P00317473	3.23315	1.69294	3.23315	up	small nucleolar RNA host gene 5 (non-protein coding)	SNHG5	FALSE	Homo sapiens small nucleolar RNA host gene 5 (non-protein coding) (SNHG5), long non-coding RNA [NR_003038]	387066		86387746	chr6	86387687	-	hs|6q14.3	NR_003038	chr6:86387746-86387687	NR_003038	Hs.292457
A_24_P296508	3.22792	1.6906	3.22792	up	solute carrier family 43 (amino acid system L transporter), member 2	SLC43A2	FALSE	Homo sapiens solute carrier family 43 (amino acid system L transporter), member 2 (SLC43A2), transcript variant 2, mRNA [NM_152346]	124935	GO:0005886|GO:0006865|GO:0016021|GO:0015179|GO:0055085|GO:0006811	1477761	chr17	1477702	-	hs|17p13.3	NM_152346	chr17:1477761-1477702	NM_152346	Hs.160550
A_23_P166248	3.22791	1.6906	3.22791	up	regulator of calcineurin 1	RCAN1	FALSE	Homo sapiens regulator of calcineurin 1 (RCAN1), transcript variant 1, mRNA [NM_004414]	1827	GO:0005515|GO:0006355|GO:0043627|GO:0003700|GO:0019722|GO:0051151|GO:0008015|GO:0048741|GO:0005634|GO:0007417|GO:0003677|GO:0009612|GO:0042802|GO:0007165|GO:0005737|GO:0043666	35889068	chr21	35889009	-	hs|21q22.12	NM_004414	chr21:35889068-35889009	NM_004414	Hs.282326
A_33_P3226129	3.22733	1.69034	3.22733	up			FALSE	HUMRPS7A ribosomal protein {Homo sapiens} (exp=-1; wgp=0; cg=0), partial (65%) [THC2633659]			1605875	chr1	1605816	+	hs|1p36.33		chr1:001605816-001605875
A_24_P379750	3.21511	1.68487	3.21511	up	MAX dimerization protein 1	MXD1	FALSE	Homo sapiens MAX dimerization protein 1 (MXD1), transcript variant 1, mRNA [NM_002357]	4084	GO:0003712|GO:0001078|GO:0003700|GO:0008283|GO:0003714|GO:0046983|GO:0007275|GO:0005634|GO:0000122|GO:0000978|GO:0006351	70169943	chr2	70169884	+	hs|2p13.3	NM_002357	chr2:70169884-70169943	NM_002357	Hs.468908
A_23_P256948	3.21349	1.68414	3.21349	up	musculin	MSC	FALSE	Homo sapiens musculin (MSC), mRNA [NM_005098]	9242	GO:0006355|GO:0003700|GO:0006366|GO:0003714|GO:0060539|GO:0046983|GO:0060021|GO:0005634|GO:0014707|GO:0003677	72754906	chr8	72754847	-	hs|8q13.3	NM_005098	chr8:72754906-72754847	NM_005098	Hs.442619
A_33_P3300495	3.21186	1.68341	3.21186	up			FALSE	plasminogen-like B1 [Source:HGNC Symbol;Acc:9072] [ENST00000409310]			87229764	chr2	87229705	-	hs|2p11.2	BC022294	chr2:87229764-87229705		Hs.652169
A_23_P414713	3.20518	1.6804	3.20518	up	zinc finger protein 528	ZNF528	FALSE	Homo sapiens zinc finger protein 528 (ZNF528), mRNA [NM_032423]	84436	GO:0006355|GO:0003700|GO:0005634|GO:0003677|GO:0046872|GO:0006351	52921236	chr19	52921177	+	hs|19q13.41	NM_032423	chr19:52921177-52921236	NM_032423	Hs.662043
A_33_P3414127	3.20467	1.68018	3.20467	up	zinc finger protein 260	ZNF260	FALSE	Homo sapiens zinc finger protein 260 (ZNF260), transcript variant 1, mRNA [NM_001012756]	339324	GO:0006355|GO:0005737|GO:0003700|GO:0005730|GO:0007275|GO:0005634|GO:0003677|GO:0046872|GO:0006351	37004629	chr19	37004570	-	hs|19q13.12	NM_001012756	chr19:37004629-37004570	NM_001012756	Hs.18103
A_23_P500433	3.20281	1.67934	3.20281	up	caspase recruitment domain family, member 9	CARD9	FALSE	Homo sapiens caspase recruitment domain family, member 9 (CARD9), transcript variant 1, mRNA [NM_052813]	64170	GO:0050700|GO:0032755|GO:0032760|GO:0050830|GO:0042493|GO:0042534|GO:0070423|GO:0046330|GO:0009620|GO:0045408|GO:0032874|GO:0042981|GO:0035872|GO:0042803|GO:0051607|GO:0005737|GO:0045076|GO:0045087|GO:0032494|GO:0032495|GO:0043123|GO:0043330	139258502	chr9	139258443	-	hs|9q34.3	NM_052813	chr9:139258502-139258443	NM_052813	Hs.694071
A_33_P3867584	3.19844	1.67737	3.19844	up	long intergenic non-protein coding RNA 1268	LINC01268	FALSE	Homo sapiens long intergenic non-protein coding RNA 1268 (LINC01268), long non-coding RNA [NR_038863]	285758		114189283	chr6	114189224	-	hs|6q21	NR_038863	chr6:114189283-114189224	NR_038863	Hs.359399
A_23_P45726	3.19766	1.67702	3.19766	up	heterogeneous nuclear ribonucleoprotein R	HNRNPR	FALSE	Homo sapiens heterogeneous nuclear ribonucleoprotein R (HNRNPR), transcript variant 2, mRNA [NM_005826]	10236	GO:0005515|GO:0006397|GO:0008380|GO:0010467|GO:0003723|GO:0005730|GO:0005634|GO:0071013|GO:0005737|GO:0000166|GO:0000398|GO:0030529|GO:0005654|GO:0005681	23636602	chr1	23636543	-	hs|1p36.12	NM_005826	chr1:23636602-23636543	NM_005826	Hs.373763
A_19_P00811789	3.19335	1.67507	3.19335	up			FALSE				124629490	chr8	124629431	-	hs|8q24.13		chr8:124629490-124629431
A_23_P363399	3.19186	1.6744	3.19186	up	solute carrier family 38, member 1	SLC38A1	FALSE	Homo sapiens solute carrier family 38, member 1 (SLC38A1), transcript variant 1, mRNA [NM_030674]	81539	GO:0030424|GO:0005886|GO:0005283|GO:0006865|GO:0007268|GO:0055085|GO:0003333|GO:0015804|GO:0006868|GO:0001504|GO:0015175|GO:0015186|GO:0016021|GO:0006814|GO:0070062|GO:0006811	46582066	chr12	46582007	-	hs|12q13.11	NM_030674	chr12:46582066-46582007	NM_030674	Hs.533770
A_32_P211045	3.19089	1.67396	3.19089	up	dihydrofolate reductase	DHFR	FALSE	Homo sapiens dihydrofolate reductase (DHFR), transcript variant 1, mRNA [NM_000791]	1719		79922127	chr5	79922068	-	hs|5q14.1	NM_000791	chr5:79922127-79922068	NM_000791	Hs.648635
A_23_P118643	3.18656	1.672	3.18656	up	eukaryotic translation initiation factor 4E	EIF4E	FALSE	Homo sapiens eukaryotic translation initiation factor 4E (EIF4E), transcript variant 1, mRNA [NM_001968]	1977	GO:0005515|GO:0000339|GO:0008286|GO:0010467|GO:0016281|GO:0010494|GO:0030324|GO:0019221|GO:0003743|GO:0006412|GO:0006413|GO:0005829|GO:0016442|GO:0005737|GO:0000082|GO:0006406|GO:0000932|GO:0016032|GO:0000289|GO:0070062|GO:0000288|GO:0031370|GO:0016070|GO:0016071|GO:0006417|GO:0033391|GO:0045931|GO:0044267|GO:0005845	99801580	chr4	99801521	-	hs|4q23	NM_001968	chr4:99801580-99801521	NM_001968	Hs.249718
A_23_P380998	3.18326	1.67051	3.18326	up	R3H domain containing 1	R3HDM1	FALSE	Homo sapiens R3H domain containing 1 (R3HDM1), transcript variant 2, mRNA [NM_015361]	23518		136482561	chr2	136482502	+	hs|2q21.3	NM_015361	chr2:136482502-136482561	NM_015361	Hs.412462
A_19_P00321546	3.17855	1.66837	3.17855	up	small nucleolar RNA host gene 5 (non-protein coding)	SNHG5	FALSE	Homo sapiens small nucleolar RNA host gene 5 (non-protein coding) (SNHG5), long non-coding RNA [NR_003038]	387066		86386885	chr6	86386826	-	hs|6q14.3	NR_003038	chr6:86386885-86386826	NR_003038	Hs.292457
A_33_P3274811	3.16674	1.663	3.16674	up	small proline-rich protein 2F	SPRR2F	FALSE	Homo sapiens small proline-rich protein 2F (SPRR2F), mRNA [NM_001014450]	6705	GO:0005737|GO:0008544|GO:0030216|GO:0031424|GO:0001533	153084715	chr1	153084656	-	hs|1q21.3	NM_001014450	chr1:153084715-153084656	NM_001014450	Hs.490252
A_33_P3526315	3.1633	1.66143	3.1633	up	uncharacterized protein MGC12488	MGC12488	FALSE	Homo sapiens, clone IMAGE:3932794, mRNA. [BC005372]	84786		33590679	chr3	33590620	-	hs|3p22.3	BC005372	chr3:33590679-33590620		Hs.659351
A_23_P371410	3.15933	1.65962	3.15933	up	protein kinase, cAMP-dependent, catalytic, beta	PRKACB	FALSE	Homo sapiens protein kinase, cAMP-dependent, catalytic, beta (PRKACB), transcript variant 3, mRNA [NM_207578]	5567	GO:0005515|GO:0048471|GO:0005886|GO:0006094|GO:0007268|GO:0044281|GO:0007202|GO:0005829|GO:0035556|GO:0007173|GO:0071377|GO:0051447|GO:0006006|GO:0006833|GO:0019433|GO:0034199|GO:0031625|GO:0070062|GO:0048011|GO:0005952|GO:0005813|GO:0000287|GO:0005975|GO:0055085|GO:0005524|GO:0007165|GO:0006112|GO:0050796|GO:0007596|GO:0008543|GO:0045087|GO:0005654|GO:0006468|GO:0007188|GO:0004691	84670750	chr1	84670691	+	hs|1p31.1	NM_207578	chr1:84670691-84670750	NM_207578	Hs.487325
A_23_P167129	3.1591	1.65951	3.1591	up	hedgehog interacting protein	HHIP	FALSE	Homo sapiens hedgehog interacting protein (HHIP), mRNA [NM_022475]	64399	GO:0005515|GO:0048038|GO:0009986|GO:0016901|GO:0005975|GO:0048705|GO:0045879|GO:0005576|GO:0009953|GO:0007224|GO:0007405|GO:0005737|GO:0060441|GO:0040036|GO:0005887|GO:0008270|GO:0009968|GO:0097108|GO:0055114	145658988	chr4	145658929	+	hs|4q31.21	NM_022475	chr4:145658929-145658988	NM_022475	Hs.507991
A_24_P125469	3.15835	1.65917	3.15835	up	lipase, endothelial	LIPG	FALSE	Homo sapiens lipase, endothelial (LIPG), mRNA [NM_006033]	9388	GO:0006629|GO:0042632|GO:0032376|GO:0007584|GO:0008283|GO:0043691|GO:0004620|GO:0004465|GO:0005615|GO:0050746|GO:0010983|GO:0034375|GO:0055091|GO:0008970|GO:0008201|GO:0009395	47118419	chr18	47118360	+	hs|18q21.1	NM_006033	chr18:47118360-47118419	NM_006033	Hs.465102
A_23_P86570	3.15596	1.65808	3.15596	up	annexin A7	ANXA7	FALSE	Homo sapiens annexin A7 (ANXA7), transcript variant 2, mRNA [NM_004034]	310	GO:0005515|GO:0014070|GO:0009651|GO:0005886|GO:0008283|GO:0008360|GO:0009992|GO:0005634|GO:0005635|GO:0005829|GO:0005544|GO:0030855|GO:0061025|GO:0070062|GO:0005509|GO:0006914|GO:0006874|GO:0007599|GO:0051592|GO:0005178|GO:0042584|GO:0010629|GO:0035176|GO:0005789|GO:0048306	75135371	chr10	75135312	-	hs|10q22.2	NM_004034	chr10:75135371-75135312	NM_004034	Hs.631827
A_24_P173746	3.15203	1.65628	3.15203	up	Ral GEF with PH domain and SH3 binding motif 2	RALGPS2	FALSE	Homo sapiens Ral GEF with PH domain and SH3 binding motif 2 (RALGPS2), transcript variant 10, mRNA [NM_152663]	55103	GO:0005085|GO:0005737|GO:0005886|GO:0007264|GO:0043087	178871278	chr1	178866870	+	hs|1q25.2	NM_152663	chr1:178866870-178871278	NM_152663	Hs.632485
A_19_P00813490	3.15126	1.65593	3.15126	up			FALSE				42423398	chr19	42423339	-	hs|19q13.2		chr19:042423398-042423339
A_24_P810290	3.14518	1.65314	3.14518	up	phosphatidic acid phosphatase type 2 domain containing 1A	PPAPDC1A	FALSE	Homo sapiens phosphatidic acid phosphatase type 2 domain containing 1A (PPAPDC1A), mRNA [NM_001030059]	196051	GO:0005886|GO:0046839|GO:0045087|GO:0016021|GO:0008195|GO:0038096	122349161	chr10	122349102	+	hs|10q26.12	NM_001030059	chr10:122349102-122349161	NM_001030059	Hs.40479
A_33_P3333820	3.14087	1.65117	3.14087	up	ubiquitin-conjugating enzyme E2R 2	UBE2R2	FALSE	Homo sapiens ubiquitin-conjugating enzyme E2R 2 (UBE2R2), mRNA [NM_017811]	54926	GO:0004842|GO:0006513|GO:0016881|GO:0070936|GO:0005524	33920401	chr9	33920342	+	hs|9p13.3	NM_017811	chr9:33920342-33920401	NM_017811	Hs.643648
A_24_P161403	3.13861	1.65012	3.13861	up			FALSE	1M9E_A Chain A, X-Ray Crystal Structure Of Cyclophilin AHIV-1 Ca N- Terminal Domain (1-146) M-Type H87a Complex. {Homo sapiens} (exp=-1; wgp=0; cg=0), complete [THC2552249]		GO:0005739|GO:0042277|GO:0016018|GO:0004600|GO:0006457|GO:0005623|GO:0003755|GO:0016853|GO:0005615|GO:0005829	166783830	chr3	166783771	+	hs|3q26.1		chr3:166783771-166783830
A_23_P59677	3.13712	1.64944	3.13712	up	RAD50 interactor 1	RINT1	FALSE	Homo sapiens RAD50 interactor 1 (RINT1), mRNA [NM_021930]	60561	GO:0005515|GO:0005783|GO:0031572|GO:0005789|GO:0016192|GO:0015031	105208058	chr7	105207999	+	hs|7q22.3	NM_021930	chr7:105207999-105208058	NM_021930	Hs.531388
A_33_P3229370	3.13683	1.64931	3.13683	up	inhibitor of DNA binding 4, dominant negative helix-loop-helix protein	ID4	FALSE	Homo sapiens inhibitor of DNA binding 4, dominant negative helix-loop-helix protein (ID4), mRNA [NM_001546]	3400	GO:0005515|GO:0008284|GO:0006357|GO:0045599|GO:0022010|GO:0003714|GO:0005634|GO:0000122|GO:0007405|GO:0048712|GO:0045669|GO:0021766|GO:0000082|GO:0005737|GO:0045665|GO:0045944|GO:0048715|GO:0001085|GO:0046983|GO:0045444|GO:0034613|GO:0045892|GO:0021895	19840900	chr6	19840841	+	hs|6p22.3	NM_001546	chr6:19840841-19840900	NM_001546	Hs.519601
A_33_P3297155	3.1353	1.6486	3.1353	up	gem (nuclear organelle) associated protein 2	GEMIN2	FALSE	Homo sapiens gem (nuclear organelle) associated protein 2 (GEMIN2), transcript variant alpha, mRNA [NM_003616]	8487	GO:0005515|GO:0006397|GO:0008380|GO:0000245|GO:0010467|GO:0016070|GO:0005730|GO:0005634|GO:0034660|GO:0000387|GO:0005829|GO:0005737|GO:0032797|GO:0000375|GO:0005654|GO:0005681|GO:0034719	39606152	chr14	39606093	+	hs|14q21.1	NM_003616	chr14:39606093-39606152	NM_003616	Hs.652307
A_24_P100673	3.13448	1.64823	3.13448	up	ER membrane protein complex subunit 4	EMC4	FALSE	Homo sapiens ER membrane protein complex subunit 4 (EMC4), transcript variant 1, mRNA [NM_016454]	51234	GO:0072546|GO:0006915|GO:0016021	34522198	chr15	34522139	+	hs|15q14	NM_016454	chr15:34522139-34522198	NM_016454	Hs.250905
A_33_P3210975	3.13438	1.64818	3.13438	up			FALSE				66545771	chr6	66545712	-	hs|6q12		chr6:066545771-066545712
A_19_P00322927	3.13395	1.64798	3.13395	up			FALSE				54307206	chr2	54307147	-	hs|2p16.2		chr2:054307206-054307147
A_19_P00804911	3.13307	1.64758	3.13307	up			FALSE				49971640	chr12	49971581	-	hs|12q13.12		chr12:049971640-049971581
A_33_P3418611	3.13175	1.64697	3.13175	up	zinc finger protein 729	ZNF729	FALSE	Homo sapiens zinc finger protein 729 (ZNF729), mRNA [NM_001242680]	100287226	GO:0006355|GO:0005634|GO:0003677|GO:0046872|GO:0006351	22499785	chr19	22499726	+	hs|19p12	NM_001242680	chr19:22499726-22499785	NM_001242680	Hs.531629
A_23_P351215	3.12674	1.64466	3.12674	up	SKI-like oncogene	SKIL	FALSE	Homo sapiens SKI-like oncogene (SKIL), transcript variant 1, mRNA [NM_005414]	6498	GO:0005515|GO:0010467|GO:0006367|GO:0070306|GO:0046332|GO:0005634|GO:0007283|GO:0032403|GO:0070208|GO:0070207|GO:0005737|GO:0007050|GO:0007179|GO:0034097|GO:0046677|GO:0002260|GO:0030512|GO:0001669|GO:0003714|GO:0019904|GO:0001825|GO:0042981|GO:0000122|GO:0070848|GO:0003677|GO:0006351|GO:0043234|GO:0007519|GO:0003682|GO:0016605|GO:0005654|GO:0050772|GO:0045596	170110153	chr3	170110094	+	hs|3q26.2	NM_005414	chr3:170110094-170110153	NM_005414	Hs.536655
A_19_P00810174	3.12451	1.64363	3.12451	up			FALSE				3309142	chr4	3309083	+	hs|4p16.3		chr4:003309083-003309142
A_19_P00810837	3.12449	1.64362	3.12449	up			FALSE				79205085	chr15	79205026	+	hs|15q25.1		chr15:079205026-079205085
A_23_P13382	3.12416	1.64347	3.12416	up	lymphocyte-specific protein 1	LSP1	FALSE	Homo sapiens lymphocyte-specific protein 1 (LSP1), transcript variant 3, mRNA [NM_001013254]	4046	GO:0007165|GO:0006968|GO:0005886|GO:0006928|GO:0003779|GO:0004871|GO:0015629|GO:0070062	1913423	chr11	1913364	+	hs|11p15.5	NM_001013254	chr11:1913364-1913423	NM_001013254	Hs.56729
A_24_P82135	3.12125	1.64213	3.12125	up	SECIS binding protein 2-like	SECISBP2L	FALSE	Homo sapiens SECIS binding protein 2-like (SECISBP2L), transcript variant 2, mRNA [NM_014701]	9728		49281776	chr15	49281717	-	hs|15q21.1	NM_014701	chr15:49281776-49281717	NM_014701	Hs.9997
A_33_P3415551	3.12047	1.64176	3.12047	up	glycerol-3-phosphate acyltransferase 2, mitochondrial	GPAT2	FALSE	Homo sapiens glycerol-3-phosphate acyltransferase 2, mitochondrial (GPAT2), mRNA [NM_207328]	150763	GO:0005739|GO:0019432|GO:0016024|GO:0005741|GO:0004366|GO:0044281|GO:0016021|GO:0006644|GO:0006072|GO:0006654|GO:0046474	96687836	chr2	96687777	-	hs|2q11.1	NM_207328	chr2:96687836-96687777	NM_207328	Hs.348629
A_23_P215214	3.12008	1.64158	3.12008	up	limb development membrane protein 1	LMBR1	FALSE	Homo sapiens limb development membrane protein 1 (LMBR1), mRNA [NM_022458]	64327	GO:0016021|GO:0042733	156473705	chr7	156473646	-	hs|7q36.3	NM_022458	chr7:156473705-156473646	NM_022458	Hs.209989
A_23_P36753	3.11703	1.64017	3.11703	up	aldehyde dehydrogenase 2 family (mitochondrial)	ALDH2	FALSE	Homo sapiens aldehyde dehydrogenase 2 family (mitochondrial) (ALDH2), transcript variant 1, mRNA [NM_000690]	217	GO:0006805|GO:0005975|GO:0006066|GO:0006069|GO:0006068|GO:0004029|GO:0007268|GO:0009055|GO:0044281|GO:0005759|GO:0042136|GO:0004030|GO:0070062	112247507	chr12	112247448	+	hs|12q24.12	NM_000690	chr12:112247448-112247507	NM_000690	Hs.604551
A_19_P00330750	3.11468	1.63908	3.11468	up			FALSE				110243677	chr8	110243618	+	hs|8q23.1		chr8:110243618-110243677
A_23_P136196	3.11422	1.63887	3.11422	up	TBC1 domain family, member 19	TBC1D19	FALSE	Homo sapiens TBC1 domain family, member 19 (TBC1D19), transcript variant 1, mRNA [NM_018317]	55296	GO:0032851|GO:0005097	26756641	chr4	26756582	+	hs|4p15.2	NM_018317	chr4:26756582-26756641	NM_018317	Hs.479403
A_19_P00802209	3.10903	1.63647	3.10903	up	diphosphoinositol pentakisphosphate kinase 2	PPIP5K2	FALSE	diphosphoinositol pentakisphosphate kinase 2 [Source:HGNC Symbol;Acc:29035] [ENST00000321521]	23262	GO:0000827|GO:0006020|GO:0033857|GO:0043647|GO:0003993|GO:0052724|GO:0052723|GO:0044281|GO:0000832|GO:0005524|GO:0005829|GO:0016310|GO:0016311	102548278	chr5	102548219	+	hs|5q21.1		chr5:102548219-102548278
A_23_P50591	3.10362	1.63395	3.10362	up	potassium channel, subfamily K, member 6	KCNK6	FALSE	Homo sapiens potassium channel, subfamily K, member 6 (KCNK6), mRNA [NM_004823]	9424	GO:0005242|GO:0005886|GO:0008076|GO:0007268|GO:0034765|GO:0060075|GO:0006813|GO:0003085|GO:0071805	38818876	chr19	38818817	+	hs|19q13.2	NM_004823	chr19:38818817-38818876	NM_004823	Hs.240395
A_24_P391960	3.10123	1.63284	3.10123	up			FALSE				182305416	chr1	182305357	+	hs|1q25.3		chr1:182305357-182305416
A_23_P63379	3.09542	1.63013	3.09542	up	carbonic anhydrase XIV	CA14	FALSE	Homo sapiens carbonic anhydrase XIV (CA14), mRNA [NM_012113]	23632	GO:0005886|GO:0015701|GO:0044281|GO:0016021|GO:0004089|GO:0046872	150237428	chr1	150237369	+	hs|1q21.2	NM_012113	chr1:150237369-150237428	NM_012113	Hs.528988
A_24_P4877	3.09538	1.63012	3.09538	up	zinc finger CCHC-type and RNA binding motif 1	ZCRB1	FALSE	Homo sapiens zinc finger CCHC-type and RNA binding motif 1 (ZCRB1), mRNA [NM_033114]	85437	GO:0008380|GO:0006397|GO:0000166|GO:0008270|GO:0005654|GO:0005689	42706792	chr12	42706733	-	hs|12q12	NM_033114	chr12:42706792-42706733	NM_033114	Hs.496279
A_23_P45699	3.09466	1.62978	3.09466	up	far upstream element (FUSE) binding protein 1	FUBP1	FALSE	Homo sapiens far upstream element (FUSE) binding protein 1 (FUBP1), mRNA [NM_003902]	8880	GO:0010628|GO:0005515|GO:0006355|GO:0003700|GO:0006366|GO:0003697|GO:0005730|GO:0005634	78414385	chr1	78414326	-	hs|1p31.1	NM_003902	chr1:78414385-78414326	NM_003902	Hs.567380
A_32_P51787	3.09136	1.62824	3.09136	up			FALSE	HSU45880 X-linked inhibitor of apotosis protein {Homo sapiens} (exp=-1; wgp=0; cg=0), partial (29%) [THC2703908]			113611221	chr2	113611162	+	hs|2q13		chr2:113611162-113611221
A_33_P3424108	3.08971	1.62747	3.08971	up			FALSE				58055998	chr17	58055939	-	hs|17q23.1		chr17:058055998-058055939
A_33_P3315824	3.08849	1.6269	3.08849	up			FALSE				2264408	chr10	2264349	+	hs|10p15.3		chr10:002264349-002264408
A_19_P00323183	3.08282	1.62425	3.08282	up			FALSE				5325049	chr5	5324990	-	hs|5p15.32		chr5:005325049-005324990
A_32_P21474	3.0797	1.62279	3.0797	up	interleukin-1 receptor-associated kinase 1 binding protein 1	IRAK1BP1	FALSE	Homo sapiens interleukin-1 receptor-associated kinase 1 binding protein 1 (IRAK1BP1), mRNA [NM_001010844]	134728	GO:0006355|GO:0005737|GO:0007249|GO:0005634|GO:0006351	79607989	chr6	79607930	+	hs|6q14.1	NM_001010844	chr6:79607930-79607989	NM_001010844	Hs.656212
A_24_P936145	3.07548	1.62081	3.07548	up	guanine nucleotide binding protein (G protein), alpha activating activity polypeptide O	GNAO1	FALSE	Homo sapiens guanine nucleotide binding protein (G protein), alpha activating activity polypeptide O (GNAO1), transcript variant 2, mRNA [NM_138736]	2775	GO:0042542|GO:0043005|GO:0005886|GO:0031852|GO:0008016|GO:0003924|GO:0046872|GO:0031175|GO:0006936|GO:0051926|GO:0007626|GO:0004871|GO:0034097|GO:0051430|GO:0042493|GO:0007568|GO:0005834|GO:0043278|GO:0007212|GO:0005525|GO:0031683|GO:0031234|GO:0006184|GO:0032794|GO:0043547|GO:0007188|GO:0031821|GO:0030900	56382035	chr16	56381976	+	hs|16q12.2	NM_138736	chr16:56381976-56382035	NM_138736	Hs.644524
A_33_P3361412	3.0732	1.61974	3.0732	up	solute carrier family 22, member 15	SLC22A15	FALSE	Homo sapiens solute carrier family 22, member 15 (SLC22A15), mRNA [NM_018420]	55356	GO:0022857|GO:0016021|GO:0055085|GO:0006811	116569642	chr1	116569583	+	hs|1p13.1	NM_018420	chr1:116569583-116569642	NM_018420	Hs.125482
A_33_P3215575	3.07251	1.61942	3.07251	up	Rho guanine nucleotide exchange factor (GEF) 10-like	ARHGEF10L	FALSE	Homo sapiens Rho guanine nucleotide exchange factor (GEF) 10-like (ARHGEF10L), transcript variant 1, mRNA [NM_018125]	55160	GO:0005737|GO:0032319|GO:0005089	18024144	chr1	18024085	+	hs|1p36.13	NM_018125	chr1:18024085-18024144	NM_018125	Hs.443460
A_23_P59888	3.07213	1.61924	3.07213	up	nascent-polypeptide-associated complex alpha polypeptide pseudogene 1	NACAP1	FALSE	Homo sapiens nascent-polypeptide-associated complex alpha polypeptide pseudogene 1 (NACAP1), non-coding RNA [NR_002182]	83955		102381814	chr8	102381755	+	hs|8q22.3	NR_002182	chr8:102381755-102381814	NR_002182	Hs.567608
A_32_P515088	3.07205	1.6192	3.07205	up	3-ketodihydrosphingosine reductase	KDSR	FALSE	Homo sapiens 3-ketodihydrosphingosine reductase (KDSR), mRNA [NM_002035]	2531	GO:0006665|GO:0047560|GO:0006666|GO:0005783|GO:0030148|GO:0005789|GO:0044281|GO:0016021|GO:0005615|GO:0055114	60995150	chr18	60995091	-	hs|18q21.33	NM_002035	chr18:60995150-60995091	NM_002035	Hs.74050
A_33_P3358601	3.06865	1.6176	3.06865	up	interferon induced transmembrane protein 10	IFITM10	FALSE	Homo sapiens interferon induced transmembrane protein 10 (IFITM10), mRNA [NM_001170820]	402778	GO:0009607|GO:0005886|GO:0016021	1753699	chr11	1753640	-	hs|11p15.5	NM_001170820	chr11:1753699-1753640	NM_001170820	Hs.121575
A_23_P33196	3.06475	1.61577	3.06475	up	collagen, type V, alpha 2	COL5A2	FALSE	Homo sapiens collagen, type V, alpha 2 (COL5A2), mRNA [NM_000393]	1290	GO:0048592|GO:0046332|GO:0005576|GO:0005588|GO:0046872|GO:0031012|GO:0003674|GO:0001501|GO:0071230|GO:0022617|GO:0007411|GO:0030198|GO:0030199|GO:0030574|GO:0005788|GO:0043588|GO:0005201	189897488	chr2	189897429	-	hs|2q32.2	NM_000393	chr2:189897488-189897429	NM_000393	Hs.445827
[truncated: 758 more rows]
