# Supplementary material for: TGFβ1-Induced Differentiation of Human Bone Marrow-Derived MSCs Is Mediated by Changes to the Actin Cytoskeleton
Source: Stem Cells Int. 2018 Feb 15;2018:6913594. doi: 10.1155/2018/6913594 (PMC5832166; doi:10.1155/2018/6913594)
Supplement: Supplementary 7 — Table S6: whole genome microarray mRNA data showing gene entities for CYD versus CNT DOWN 2523 genes. [file 6913594.f7.xlsx]

## Sheet: ALL Entities   CC vs CNT down  
ProbeName	FC ([CC] vs [CNT D1])	Log FC ([CC] vs [CNT D1])	FC (abs) ([CC] vs [CNT D1])	Regulation ([CC] vs [CNT D1])	GeneSymbol	GeneName	ControlType	Description	EntrezGeneID	Go	Chromosome End Index_Avadis_	Chromosome Number_Avadis_	Chromosome Start Index_Avadis_	Chromosome Strand_Avadis_	Cytoband	GenbankAccession	GenomicCoordinates	RefSeqAccession	UniGeneID
A_23_P161218	-51.0331	-5.67336	51.0331	down	ANKRD1	ankyrin repeat domain 1 (cardiac muscle)	FALSE	Homo sapiens ankyrin repeat domain 1 (cardiac muscle) (ANKRD1), mRNA [NM_014391]	27063	GO:0005515|GO:0042826|GO:0050714|GO:0071560|GO:0005634|GO:0044281|GO:0035914|GO:0030017|GO:0005829|GO:0002039|GO:0005737|GO:0045944|GO:0071356|GO:0001085|GO:0055008|GO:0044255|GO:0005667|GO:0001105|GO:0043065|GO:0003714|GO:0045214|GO:0005730|GO:0071456|GO:0070412|GO:0035994|GO:0000122|GO:0003677|GO:0035690|GO:0031432|GO:0071407|GO:0071222|GO:0071347|GO:0010976|GO:0043517|GO:2000279|GO:0005654|GO:…	92672621	chr10	92672562	-	hs|10q23.31	NM_014391	chr10:92672621-92672562	NM_014391	Hs.448589
A_24_P419132	-36.2322	-5.1792	36.2322	down	CENPI	centromere protein I	FALSE	Homo sapiens centromere protein I (CENPI), mRNA [NM_006733]	2491	GO:0034080|GO:0005515|GO:0005737|GO:0006334|GO:0000776|GO:0007548|GO:0005654|GO:0005634|GO:0000278|GO:0005829	100395708	chrX	100387440	+	hs|Xq22.1	NM_006733	chrX:100387440-100395708	NM_006733	Hs.348920
A_24_P346855	-33.5074	-5.06641	33.5074	down	MKI67	marker of proliferation Ki-67	FALSE	Homo sapiens marker of proliferation Ki-67 (MKI67), transcript variant 1, mRNA [NM_002417]	4288	GO:0005515|GO:0000793|GO:0005737|GO:0007126|GO:0016020|GO:0008283|GO:0005730|GO:0005634|GO:0008022|GO:0005524|GO:0000775	129895700	chr10	129895641	-	hs|10q26.2	NM_002417	chr10:129895700-129895641	NM_002417	Hs.80976
A_24_P887857	-28.2041	-4.81783	28.2041	down			FALSE	keratin 17 pseudogene 3 [Source:HGNC Symbol;Acc:HGNC:33697] [ENST00000420566]			28895897	chr17	28895838	-	hs|17q11.2		chr17:28895897-28895838
A_23_P10206	-27.766	-4.79525	27.766	down	HAS2	hyaluronan synthase 2	FALSE	Homo sapiens hyaluronan synthase 2 (HAS2), mRNA [NM_005328]	3037	GO:0008284|GO:0030335|GO:0001822|GO:0070295|GO:0071498|GO:0045226|GO:0085029|GO:0036120|GO:0005887|GO:0060349|GO:0071356|GO:0071347|GO:0030213|GO:0050501|GO:0035810|GO:1900625|GO:0001570	122626146	chr8	122626087	-	hs|8q24.13	NM_005328	chr8:122626146-122626087	NM_005328	Hs.159226
A_32_P198731	-25.2188	-4.65643	25.2188	down	NEURL1B	neuralized E3 ubiquitin protein ligase 1B	FALSE	Homo sapiens neuralized E3 ubiquitin protein ligase 1B (NEURL1B), mRNA [NM_001142651]	54492	GO:0005737|GO:0016567|GO:0007219|GO:0016874|GO:0008270	172118375	chr5	172118316	+	hs|5q35.1	NM_001142651	chr5:172118316-172118375	NM_001142651	Hs.91521
A_33_P3327041	-24.7538	-4.62958	24.7538	down	PLCE1-AS1	PLCE1 antisense RNA 1	FALSE	Homo sapiens PLCE1 antisense RNA 1 (PLCE1-AS1), long non-coding RNA [NR_033969]	100128054		96039115	chr10	96039056	-	hs|10q23.33	NR_033969	chr10:96039115-96039056	NR_033969	Hs.677562
A_33_P3387524	-24.1341	-4.593	24.1341	down	DEPDC1	DEP domain containing 1	FALSE	Homo sapiens DEP domain containing 1 (DEPDC1), transcript variant 1, mRNA [NM_001114120]	55635	GO:0043547|GO:0035556|GO:0005515|GO:0017053|GO:0005654|GO:0005634|GO:0045892|GO:0006351|GO:0005096	68941036	chr1	68940977	-	hs|1p31.2	NM_001114120	chr1:68941036-68940977	NM_001114120	Hs.445098
A_23_P155711	-23.8377	-4.57517	23.8377	down	NEIL3	nei endonuclease VIII-like 3 (E. coli)	FALSE	Homo sapiens nei endonuclease VIII-like 3 (E. coli) (NEIL3), mRNA [NM_018248]	55247	GO:0003906|GO:0003684|GO:0019104|GO:0003690|GO:0003697|GO:0000405|GO:0006284|GO:0008270|GO:0005634|GO:0006289|GO:0000737	178283546	chr4	178283487	+	hs|4q34.3	NM_018248	chr4:178283487-178283546	NM_018248	Hs.405467
A_33_P3514487	-23.442	-4.55103	23.442	down	VSTM1	V-set and transmembrane domain containing 1	FALSE	Homo sapiens V-set and transmembrane domain containing 1 (VSTM1), transcript variant 1, mRNA [NM_198481]	284415	GO:0016021|GO:0005615|GO:0005125|GO:0002376	54544173	chr19	54544114	-	hs|19q13.42	NM_198481	chr19:54544173-54544114	NM_198481	Hs.444431
A_32_P76627	-22.6765	-4.50313	22.6765	down			FALSE	keratin 16 pseudogene 6 [Source:HGNC Symbol;Acc:HGNC:50719] [ENST00000417510]			16722625	chr17	16722566	-	hs|17p11.2		chr17:16722625-16722566
A_23_P29723	-22.6699	-4.50271	22.6699	down	SGOL1	shugoshin-like 1 (S. pombe)	FALSE	Homo sapiens shugoshin-like 1 (S. pombe) (SGOL1), transcript variant A2, mRNA [NM_001012410]	151648	GO:0005515|GO:0000780|GO:0010457|GO:0005813|GO:0030892|GO:0005829|GO:0007067|GO:0000922|GO:0005737|GO:0007059|GO:0045132|GO:0000777|GO:0000776|GO:0000779|GO:0005654|GO:0019900|GO:0008608|GO:0000278|GO:0000775|GO:0051301	20202365	chr3	20202306	-	hs|3p24.3	NM_001012410	chr3:20202365-20202306	NM_001012410	Hs.105153
A_24_P225616	-21.6785	-4.43819	21.6785	down	RRM2	ribonucleotide reductase M2	FALSE	Homo sapiens ribonucleotide reductase M2 (RRM2), transcript variant 2, mRNA [NM_001034]	6241	GO:0005515|GO:0009186|GO:0015949|GO:0055086|GO:0051290|GO:0005634|GO:0044281|GO:0046872|GO:0005829|GO:0006260|GO:0000082|GO:0005737|GO:0000083|GO:0009263|GO:0005654|GO:0004748|GO:0000278|GO:0055114	10270546	chr2	10270487	+	hs|2p25.1	NM_001034	chr2:10270487-10270546	NM_001034	Hs.226390
A_24_P413884	-20.681	-4.37023	20.681	down	CENPA	centromere protein A	FALSE	Homo sapiens centromere protein A (CENPA), transcript variant 1, mRNA [NM_001809]	1058	GO:0005515|GO:0000780|GO:0046982|GO:0006334|GO:0000132|GO:0005634|GO:0071459|GO:0003677|GO:0005829|GO:0034080|GO:0051382|GO:0003682|GO:0016032|GO:0005654|GO:0000778|GO:0000278|GO:0000786|GO:0000775|GO:0000939	27016973	chr2	27016914	+	hs|2p23.3	NM_001809	chr2:27016914-27016973	NM_001809	Hs.1594
A_24_P319613	-20.1847	-4.33519	20.1847	down	NEK2	NIMA-related kinase 2	FALSE	Homo sapiens NIMA-related kinase 2 (NEK2), transcript variant 1, mRNA [NM_002497]	4751	GO:0005515|GO:0005634|GO:0031145|GO:0046872|GO:0005829|GO:0005737|GO:0046777|GO:0007059|GO:0000086|GO:0090307|GO:0051321|GO:0000794|GO:0005813|GO:0007088|GO:0006996|GO:0051988|GO:0019903|GO:0001824|GO:0005874|GO:0046602|GO:0005730|GO:0030496|GO:0051225|GO:0005524|GO:0045171|GO:0043392|GO:0043234|GO:0000922|GO:0000070|GO:0007067|GO:0004672|GO:0004674|GO:0051299|GO:0000777|GO:0000776|GO:0006468|GO:…	211842647	chr1	211842588	-	hs|1q32.3	NM_002497	chr1:211842647-211842588	NM_002497	Hs.153704
A_23_P129075	-19.9966	-4.32169	19.9966	down	WDR76	WD repeat domain 76	FALSE	Homo sapiens WD repeat domain 76 (WDR76), transcript variant 1, mRNA [NM_024908]	79968		44158674	chr15	44158615	+	hs|15q15.3	NM_024908	chr15:44158615-44158674	NM_024908	Hs.250154
A_23_P58321	-18.9821	-4.24657	18.9821	down	CCNA2	cyclin A2	FALSE	Homo sapiens cyclin A2 (CCNA2), mRNA [NM_001237]	890	GO:0005515|GO:0007095|GO:0019901|GO:0010389|GO:0031100|GO:0005634|GO:0007265|GO:0048146|GO:0000079|GO:0005737|GO:0007067|GO:0001939|GO:0033762|GO:0000086|GO:0005654|GO:0001940|GO:0045893|GO:0000278|GO:0032355|GO:0051301	122740054	chr4	122739995	-	hs|4q27	NM_001237	chr4:122740054-122739995	NM_001237	Hs.58974
A_32_P24376	-18.8884	-4.23943	18.8884	down	KRTAP2-3	keratin associated protein 2-3	FALSE	Homo sapiens keratin associated protein 2-3 (KRTAP2-3), mRNA [NM_001165252]	730755	GO:0045095	39215637	chr17	39215578	-	hs|17q21.2	NM_001165252	chr17:39215637-39215578	NM_001165252	Hs.406714
A_33_P3286422	-18.8353	-4.23537	18.8353	down	FANCA	Fanconi anemia, complementation group A	FALSE	Homo sapiens Fanconi anemia, complementation group A (FANCA), transcript variant 2, mRNA [NM_001018112]	2175	GO:0005515|GO:0008585|GO:0005737|GO:0006461|GO:0006281|GO:0042127|GO:0005730|GO:0005654|GO:0005634|GO:0008584|GO:0043240|GO:0007140	89864823	chr16	89864767	-	hs|16q24.3	NM_001018112	chr16:89864823-89864767	NM_001018112	Hs.744083
A_33_P3345534	-18.657	-4.22165	18.657	down	KRT14	keratin 14, type I	FALSE	Homo sapiens keratin 14, type I (KRT14), mRNA [NM_000526]	3861	GO:0005515|GO:0005882|GO:0042633|GO:0034329|GO:0007568|GO:0005634|GO:0010043|GO:0071944|GO:0005829|GO:0005737|GO:0008544|GO:0010212|GO:0030855|GO:0045110|GO:0005200|GO:0031581|GO:0045095|GO:0070062	39740072	chr17	39740013	-	hs|17q21.2	NM_000526	chr17:39740072-39740013	NM_000526	Hs.654380
A_23_P155969	-18.5843	-4.21601	18.5843	down	PLK4	polo-like kinase 4	FALSE	Homo sapiens polo-like kinase 4 (PLK4), transcript variant 1, mRNA [NM_014264]	10733	GO:0005515|GO:0005813|GO:0006996|GO:0007099|GO:0005814|GO:0060707|GO:0005730|GO:0005524|GO:0032154|GO:0046601|GO:0042802|GO:0005829|GO:0004674|GO:0000086|GO:0006468|GO:0000278	128816241	chr4	128816182	+	hs|4q28.2	NM_014264	chr4:128816182-128816241	NM_014264	Hs.172052
A_23_P349566	-18.498	-4.2093	18.498	down	CCDC85A	coiled-coil domain containing 85A	FALSE	Homo sapiens coiled-coil domain containing 85A (CCDC85A), mRNA [NM_001080433]	114800		56612864	chr2	56612805	+	hs|2p16.1	NM_001080433	chr2:56612805-56612864	NM_001080433	Hs.117136
A_23_P133956	-18.4038	-4.20193	18.4038	down	KIFC1	kinesin family member C1	FALSE	Homo sapiens kinesin family member C1 (KIFC1), mRNA [NM_002263]	3833	GO:0008017|GO:0005871|GO:0005815|GO:0005874|GO:0005819|GO:0005634|GO:0003777|GO:0051225|GO:0005524|GO:0000070|GO:0008569|GO:0016020|GO:0007596|GO:0008152|GO:0090307|GO:0007080|GO:0016887|GO:0005769|GO:0051301|GO:0007018	33374621	chr6	33374428	+	hs|6p21.32	NM_002263	chr6:33374428-33374621	NM_002263	Hs.436912
A_23_P100127	-18.3119	-4.19471	18.3119	down	CASC5	cancer susceptibility candidate 5	FALSE	Homo sapiens cancer susceptibility candidate 5 (CASC5), transcript variant 1, mRNA [NM_170589]	57082	GO:0005515|GO:0001675|GO:0001669|GO:0034501|GO:0006334|GO:0005634|GO:0005829|GO:0034080|GO:0005737|GO:0007067|GO:0010923|GO:0071173|GO:0000777|GO:0005654|GO:0000278|GO:0008608|GO:0070062|GO:0051301	40917584	chr15	40917525	+	hs|15q15.1	NM_170589	chr15:40917525-40917584	NM_170589	Hs.181855
A_33_P3276918	-18.2717	-4.19154	18.2717	down	FAM64A	family with sequence similarity 64, member A	FALSE	Homo sapiens family with sequence similarity 64, member A (FAM64A), transcript variant 2, mRNA [NM_001195228]	54478	GO:0005515|GO:0007067|GO:0005737|GO:0005730|GO:0005634|GO:0051301	6352726	chr17	6352667	+	hs|17p13.2	NM_001195228	chr17:6352667-6352726	NM_001195228	Hs.592116
A_19_P00317178	-18.0402	-4.17315	18.0402	down	SNHG5	small nucleolar RNA host gene 5 (non-protein coding)	FALSE	Homo sapiens small nucleolar RNA host gene 5 (non-protein coding) (SNHG5), long non-coding RNA [NR_003038]	387066		86387747	chr6	86387688	-	hs|6q14.3	NR_003038	chr6:86387747-86387688	NR_003038	Hs.292457
A_33_P3230254	-17.6498	-4.14158	17.6498	down	NCAPG	non-SMC condensin I complex, subunit G	FALSE	Homo sapiens non-SMC condensin I complex, subunit G (NCAPG), transcript variant 1, mRNA [NM_022346]	64151	GO:0005515|GO:0000796|GO:0007076|GO:0005813|GO:0005737|GO:0016020|GO:0005634|GO:0015629|GO:0000278|GO:0051301|GO:0005829	17846485	chr4	17846426	+	hs|4p15.31	NM_022346	chr4:17846426-17846485	NM_022346	Hs.567567
A_23_P35871	-17.518	-4.13077	17.518	down	E2F8	E2F transcription factor 8	FALSE	Homo sapiens E2F transcription factor 8 (E2F8), transcript variant 1, mRNA [NM_024680]	79733	GO:0005515|GO:0005667|GO:0032466|GO:0003700|GO:0008283|GO:0003714|GO:0060707|GO:0032877|GO:0001047|GO:0002040|GO:0005634|GO:0000122|GO:0001890|GO:0000978|GO:0042803|GO:0006351|GO:0001078|GO:0045944|GO:0033301|GO:0060718|GO:0070365	19245734	chr11	19245675	-	hs|11p15.1	NM_024680	chr11:19245734-19245675	NM_024680	Hs.523526
A_33_P3317460	-17.5021	-4.12945	17.5021	down			FALSE				132056314	chr2	132056255	-	hs|2q21.1		chr2:132056314-132056255
A_23_P74349	-17.3283	-4.11506	17.3283	down	NUF2	NUF2, NDC80 kinetochore complex component	FALSE	Homo sapiens NUF2, NDC80 kinetochore complex component (NUF2), transcript variant 1, mRNA [NM_145697]	83540	GO:0005515|GO:0003674|GO:0007067|GO:0007059|GO:0016020|GO:0000777|GO:0005634|GO:0000278|GO:0031262|GO:0000775|GO:0051301|GO:0005829	163325203	chr1	163325144	+	hs|1q23.3	NM_145697	chr1:163325144-163325203	NM_145697	Hs.651950
A_24_P11575	-17.2323	-4.10704	17.2323	down	CRIM1	cysteine rich transmembrane BMP regulator 1 (chordin-like)	FALSE	Homo sapiens cysteine rich transmembrane BMP regulator 1 (chordin-like) (CRIM1), mRNA [NM_016441]	51232	GO:0010951|GO:0005886|GO:0004867|GO:0005010|GO:0048009|GO:0016021|GO:0030165|GO:0001558|GO:0070062|GO:0007399|GO:0005520	36777886	chr2	36777827	+	hs|2p22.2	NM_016441	chr2:36777827-36777886	NM_016441	Hs.699247
A_33_P3807062	-16.9999	-4.08745	16.9999	down	HJURP	Holliday junction recognition protein	FALSE	Homo sapiens Holliday junction recognition protein (HJURP), transcript variant 1, mRNA [NM_018410]	55355	GO:0005515|GO:0005730|GO:0006334|GO:0005634|GO:0003677|GO:0042802|GO:0034080|GO:0042393|GO:0005737|GO:0007049|GO:0007059|GO:0051101|GO:0043254|GO:0000777|GO:0005654|GO:0000775	234746088	chr2	234746029	-	hs|2q37.1	NM_018410	chr2:234746088-234746029	NM_018410	Hs.532968
A_23_P51085	-16.5949	-4.05267	16.5949	down	SPC25	SPC25, NDC80 kinetochore complex component	FALSE	Homo sapiens SPC25, NDC80 kinetochore complex component (SPC25), mRNA [NM_020675]	57405	GO:0005515|GO:0007067|GO:0007059|GO:0000777|GO:0005634|GO:0007052|GO:0000278|GO:0031262|GO:0051301|GO:0005829	169728015	chr2	169727956	-	hs|2q31.1	NM_020675	chr2:169728015-169727956	NM_020675	Hs.421956
A_23_P138507	-16.4457	-4.03964	16.4457	down	CDK1	cyclin-dependent kinase 1	FALSE	Homo sapiens cyclin-dependent kinase 1 (CDK1), transcript variant 1, mRNA [NM_001786]	983	GO:0005515|GO:0007077|GO:0014070|GO:0033160|GO:0030261|GO:0034501|GO:0014075|GO:0002756|GO:0018105|GO:0007173|GO:0000165|GO:0007411|GO:0018107|GO:0002755|GO:0005813|GO:0038124|GO:0006996|GO:0038123|GO:0034134|GO:0030332|GO:0007569|GO:0030496|GO:0009636|GO:0002224|GO:0035173|GO:0006281|GO:0008543|GO:0030544|GO:0035666|GO:0034166|GO:0005654|GO:0000278|GO:0038095|GO:0034162|GO:0004693|GO:0007095|GO:…	62553650	chr10	62552004	+	hs|10q21.2	NM_001786	chr10:62552004-62553650	NM_001786	Hs.732435
A_33_P3288159	-16.4007	-4.03568	16.4007	down	ASPM	asp (abnormal spindle) homolog, microcephaly associated (Drosophila)	FALSE	Homo sapiens asp (abnormal spindle) homolog, microcephaly associated (Drosophila) (ASPM), transcript variant 1, mRNA [NM_018136]	259266	GO:0097150|GO:0005516|GO:0021987|GO:0048477|GO:0090263|GO:0005874|GO:0002052|GO:0030496|GO:0005634|GO:0007283|GO:0045769|GO:0021873|GO:0072687|GO:0005737|GO:0007067|GO:0051661|GO:0048589|GO:0045665|GO:0090306|GO:0001764|GO:0008584	197057458	chr1	197057399	-	hs|1q31.3	NM_018136	chr1:197057458-197057399	NM_018136	Hs.121028
A_33_P3413741	-16.3712	-4.03309	16.3712	down	OXTR	oxytocin receptor	FALSE	Homo sapiens oxytocin receptor (OXTR), mRNA [NM_000916]	5021	GO:0005886|GO:0060406|GO:0043434|GO:0045777|GO:0042220|GO:0007204|GO:0021537|GO:0032870|GO:0001992|GO:0007507|GO:0016324|GO:0006936|GO:0005913|GO:0001967|GO:0070474|GO:0045907|GO:0004990|GO:0005000|GO:0060455|GO:0007613|GO:0070371|GO:0034097|GO:0032355|GO:0051965|GO:0042711|GO:0042277|GO:0007565|GO:0042493|GO:0051968|GO:0034059|GO:0060137|GO:0048565|GO:0030431|GO:0010701|GO:0032230|GO:0042713|GO:…	8792187	chr3	8792128	-	hs|3p25.3	NM_000916	chr3:8792187-8792128	NM_000916	Hs.2820
A_33_P3393135	-16.3148	-4.02811	16.3148	down	HIST1H2AI	histone cluster 1, H2ai	FALSE	Homo sapiens histone cluster 1, H2ai, mRNA (cDNA clone MGC:138459 IMAGE:8327722), complete cds. [BC112254]	8329	GO:0005515|GO:0008150|GO:0046982|GO:0005634|GO:0019899|GO:0000786|GO:0003677|GO:0070062	27776001	chr6	27775942	+	hs|6p22.1	BC112254	chr6:27775942-27776001		Hs.534035
A_23_P115872	-16.0371	-4.00334	16.0371	down	CEP55	centrosomal protein 55kDa	FALSE	Homo sapiens centrosomal protein 55kDa (CEP55), transcript variant 1, mRNA [NM_018131]	55165	GO:0005515|GO:0000920|GO:0006997|GO:0005813|GO:0016020|GO:0005814|GO:0000281|GO:0030496|GO:0007080|GO:0032154|GO:0045184|GO:0045171	95288813	chr10	95288754	+	hs|10q23.33	NM_018131	chr10:95288754-95288813	NM_018131	Hs.14559
A_23_P375	-15.7976	-3.98163	15.7976	down	CDCA8	cell division cycle associated 8	FALSE	Homo sapiens cell division cycle associated 8 (CDCA8), transcript variant 2, mRNA [NM_018101]	55143	GO:0005515|GO:0051276|GO:0010369|GO:0005730|GO:0005819|GO:0030496|GO:0005634|GO:0005829|GO:0045171|GO:0032133|GO:0043234|GO:0007080|GO:0000278|GO:0000775|GO:0051301	38175208	chr1	38175149	+	hs|1p34.3	NM_018101	chr1:38175149-38175208	NM_018101	Hs.524571
A_24_P297539	-15.7419	-3.97653	15.7419	down	UBE2C	ubiquitin-conjugating enzyme E2C	FALSE	Homo sapiens ubiquitin-conjugating enzyme E2C (UBE2C), transcript variant 4, mRNA [NM_181801]	11065	GO:0010994|GO:0005515|GO:0007094|GO:0006511|GO:0004842|GO:0016567|GO:0016874|GO:0031145|GO:0005829|GO:0051488|GO:0008054|GO:0005737|GO:0019787|GO:0005680|GO:0031625|GO:0010458|GO:0031536|GO:0051437|GO:0051436|GO:0005524|GO:0051439|GO:0070979|GO:0005654|GO:0030071|GO:0070936|GO:0000278|GO:0051301	44445584	chr20	44445525	+	hs|20q13.12	NM_181801	chr20:44445525-44445584	NM_181801	Hs.93002
A_23_P250385	-15.7223	-3.97474	15.7223	down	HIST1H1B	histone cluster 1, H1b	FALSE	Homo sapiens histone cluster 1, H1b (HIST1H1B), mRNA [NM_005322]	3009	GO:0000790|GO:0042826|GO:0030307|GO:0006325|GO:0006334|GO:0050821|GO:0000122|GO:0031490|GO:0051574|GO:0005720|GO:0071169|GO:0000786|GO:0070062	27834688	chr6	27834629	-	hs|6p22.1	NM_005322	chr6:27834688-27834629	NM_005322	Hs.131956
A_19_P00322339	-15.7062	-3.97326	15.7062	down	LINC00707	long intergenic non-protein coding RNA 707	FALSE	Homo sapiens long intergenic non-protein coding RNA 707 (LINC00707), long non-coding RNA [NR_038291]	100507127		6884488	chr10	6884429	+	hs|10p14	NR_038291	chr10:6884429-6884488	NR_038291	Hs.498571
A_24_P105747	-15.6303	-3.96627	15.6303	down	AP1S3	adaptor-related protein complex 1, sigma 3 subunit	FALSE	Homo sapiens adaptor-related protein complex 1, sigma 3 subunit (AP1S3), transcript variant 1, mRNA [NM_001039569]	130340	GO:0006892|GO:0006605|GO:0005765|GO:0032588|GO:0030117|GO:0005829|GO:0050690|GO:0019886|GO:0005905|GO:0000139|GO:0008565|GO:0061024|GO:0016032|GO:0030659	224622433	chr2	224622374	-	hs|2q36.1	NM_001039569	chr2:224622433-224622374	NM_001039569	Hs.632555
A_32_P96719	-15.4032	-3.94516	15.4032	down	SHCBP1	SHC SH2-domain binding protein 1	FALSE	Homo sapiens SHC SH2-domain binding protein 1 (SHCBP1), mRNA [NM_024745]	79801	GO:2000177|GO:0008543|GO:0042169	46615134	chr16	46615075	-	hs|16q11.2	NM_024745	chr16:46615134-46615075	NM_024745	Hs.123253
A_23_P130182	-15.3194	-3.93729	15.3194	down	AURKB	aurora kinase B	FALSE	Homo sapiens aurora kinase B (AURKB), transcript variant 1, mRNA [NM_004217]	9212	GO:0051256|GO:0043146|GO:0005515|GO:0032091|GO:0031577|GO:0008283|GO:0034501|GO:0005634|GO:0051233|GO:0031145|GO:0046872|GO:0036089|GO:0005829|GO:0009838|GO:0034644|GO:0046777|GO:0002903|GO:0005876|GO:0000780|GO:0032466|GO:0010369|GO:0032467|GO:0007568|GO:0051983|GO:0005819|GO:0016570|GO:0030496|GO:0000122|GO:0005524|GO:0035174|GO:0032133|GO:0004674|GO:0043988|GO:0004712|GO:0000779|GO:0006468|GO:…	8110917	chr17	8110655	-	hs|17p13.1	NM_004217	chr17:8110917-8110655	NM_004217	Hs.442658
A_23_P66732	-15.2919	-3.9347	15.2919	down	GSG2	germ cell associated 2 (haspin)	FALSE	Homo sapiens germ cell associated 2 (haspin) (GSG2), mRNA [NM_031965]	83903	GO:0090231|GO:0005515|GO:0005813|GO:0005694|GO:0005819|GO:2000134|GO:0005634|GO:0071459|GO:0003677|GO:0005524|GO:0072354|GO:0035556|GO:0005737|GO:0004672|GO:2000751|GO:0006468|GO:0007064	3629477	chr17	3629418	+	hs|17p13.2	NM_031965	chr17:3629418-3629477	NM_031965	Hs.534059
A_23_P162719	-15.1751	-3.92364	15.1751	down	DIAPH3	diaphanous-related formin 3	FALSE	Homo sapiens diaphanous-related formin 3 (DIAPH3), transcript variant 2, mRNA [NM_030932]	81624	GO:0030036|GO:0017048|GO:0005634|GO:0003779|GO:0007283|GO:0005829	60453455	chr13	60453396	-	hs|13q21.2	NM_030932	chr13:60453455-60453396	NM_030932	Hs.283127
A_33_P3392187	-14.9445	-3.90154	14.9445	down	CCDC85A	coiled-coil domain containing 85A	FALSE	Homo sapiens coiled-coil domain containing 85A (CCDC85A), mRNA [NM_001080433]	114800		56612701	chr2	56612642	+	hs|2p16.1	NM_001080433	chr2:56612642-56612701	NM_001080433	Hs.117136
A_24_P218979	-14.919	-3.89908	14.919	down	CDCA3	cell division cycle associated 3	FALSE	Homo sapiens cell division cycle associated 3 (CDCA3), transcript variant 1, mRNA [NM_031299]	83461	GO:0008150|GO:0003674|GO:0007067|GO:0016567|GO:0005575|GO:0051301|GO:0005829	6958498	chr12	6958315	-	hs|12p13.31	NM_031299	chr12:6958498-6958315	NM_031299	Hs.524216
A_32_P471485	-14.8727	-3.89459	14.8727	down	RTKN2	rhotekin 2	FALSE	Homo sapiens rhotekin 2 (RTKN2), transcript variant 2, mRNA [NM_001282941]	219790	GO:0030097|GO:0007165|GO:0008284|GO:0005886	63998464	chr10	63998405	-	hs|10q21.2	NM_001282941	chr10:63998464-63998405	NM_001282941	Hs.58559
A_24_P357266	-14.8694	-3.89427	14.8694	down	GRPR	gastrin-releasing peptide receptor	FALSE	Homo sapiens gastrin-releasing peptide receptor (GRPR), mRNA [NM_005314]	2925	GO:0004946|GO:0031989|GO:0007186|GO:0005886|GO:0008283|GO:0005887|GO:0042127|GO:0008528	16171110	chrX	16171051	+	hs|Xp22.2	NM_005314	chrX:16171051-16171110	NM_005314	Hs.567282
A_24_P882732	-14.7555	-3.88318	14.7555	down			FALSE	keratin 17 pseudogene 2 [Source:HGNC Symbol;Acc:HGNC:6429] [ENST00000300992]			18334033	chr17	18333974	+	hs|17p11.2	DR007925	chr17:18333974-18334033		Hs.579266
A_33_P3230548	-14.7207	-3.87978	14.7207	down	KIF14	kinesin family member 14	FALSE	Homo sapiens kinesin family member 14 (KIF14), mRNA [NM_014875]	9928	GO:0008017|GO:0005515|GO:0021846|GO:0008284|GO:0021987|GO:0005886|GO:0021695|GO:0005634|GO:0051233|GO:0031146|GO:0033624|GO:0030155|GO:0001558|GO:2000045|GO:0045184|GO:0032147|GO:0043523|GO:0043524|GO:0005737|GO:0015631|GO:0021772|GO:0008574|GO:0034446|GO:0031641|GO:0016887|GO:0007019|GO:0007018|GO:0030334|GO:0043066|GO:0005871|GO:0019901|GO:0021685|GO:0032467|GO:0010389|GO:0032487|GO:0005874|GO:…	200521383	chr1	200521324	-	hs|1q32.1	NM_014875	chr1:200521383-200521324	NM_014875	Hs.3104
A_23_P71530	-14.5645	-3.86439	14.5645	down	TNFRSF11B	tumor necrosis factor receptor superfamily, member 11b	FALSE	Homo sapiens tumor necrosis factor receptor superfamily, member 11b (TNFRSF11B), mRNA [NM_002546]	4982	GO:0046685|GO:0043627|GO:0007584|GO:0042493|GO:0005578|GO:0006915|GO:0005576|GO:0005125|GO:0005615|GO:0045779|GO:0007165|GO:0001501|GO:0030198|GO:0032026|GO:0004872|GO:0042489	119936779	chr8	119936720	-	hs|8q24.12	NM_002546	chr8:119936779-119936720	NM_002546	Hs.81791
A_24_P296254	-14.5548	-3.86342	14.5548	down	ARHGAP11A	Rho GTPase activating protein 11A	FALSE	Homo sapiens Rho GTPase activating protein 11A (ARHGAP11A), transcript variant 1, mRNA [NM_014783]	9824	GO:0043547|GO:0051056|GO:0007264|GO:0005829|GO:0005096	32931291	chr15	32931232	+	hs|15q13.3	NM_014783	chr15:32931232-32931291	NM_014783	Hs.591130
A_23_P323751	-14.5061	-3.85858	14.5061	down	FAM83D	family with sequence similarity 83, member D	FALSE	Homo sapiens family with sequence similarity 83, member D (FAM83D), mRNA [NM_030919]	81610	GO:0007067|GO:0005737|GO:0000922|GO:0051301	37581385	chr20	37581326	+	hs|20q11.23	NM_030919	chr20:37581326-37581385	NM_030919	Hs.726442
A_24_P323598	-14.4842	-3.85641	14.4842	down	ESCO2	establishment of sister chromatid cohesion N-acetyltransferase 2	FALSE	Homo sapiens establishment of sister chromatid cohesion N-acetyltransferase 2 (ESCO2), mRNA [NM_001017420]	157570	GO:0001741|GO:0005794|GO:0010369|GO:0034421|GO:0035861|GO:0005634|GO:0046872|GO:0006302|GO:0004468|GO:0007059|GO:0002244|GO:0005654|GO:0071168|GO:0000278|GO:0031618|GO:0000785|GO:0006275	27662160	chr8	27662101	+	hs|8p21.1	NM_001017420	chr8:27662101-27662160	NM_001017420	Hs.99480
A_33_P3291831	-14.4514	-3.85314	14.4514	down	CEP55	centrosomal protein 55kDa	FALSE	Homo sapiens centrosomal protein 55kDa (CEP55), transcript variant 1, mRNA [NM_018131]	55165	GO:0005515|GO:0000920|GO:0006997|GO:0005813|GO:0016020|GO:0005814|GO:0000281|GO:0030496|GO:0007080|GO:0032154|GO:0045184|GO:0045171	95279537	chr10	95279478	+	hs|10q23.33	NM_018131	chr10:95279478-95279537	NM_018131	Hs.14559
A_24_P322354	-14.4171	-3.8497	14.4171	down	SKA1	spindle and kinetochore associated complex subunit 1	FALSE	Homo sapiens spindle and kinetochore associated complex subunit 1 (SKA1), transcript variant 1, mRNA [NM_001039535]	220134	GO:0008017|GO:0005515|GO:0007067|GO:0000940|GO:0007059|GO:0031110|GO:0015630|GO:0005876|GO:0000278|GO:0051301|GO:0005829	47919958	chr18	47919899	+	hs|18q21.1	NM_001039535	chr18:47919899-47919958	NM_001039535	Hs.134726
A_33_P3257678	-14.3161	-3.83957	14.3161	down	HIST2H3A	histone cluster 2, H3a	FALSE	Homo sapiens histone cluster 2, H3a (HIST2H3A), mRNA [NM_001005464]	333932	GO:0005515|GO:0010467|GO:0046982|GO:0005576|GO:0005634|GO:0003677|GO:0032776|GO:0000183|GO:0007596|GO:0045814|GO:0040029|GO:0005654|GO:0000786|GO:0070062	149824685	chr1	149824626	+	hs|1q21.2	NM_001005464	chr1:149824626-149824685	NM_001005464	Hs.706618
A_23_P356684	-14.3062	-3.83857	14.3062	down	ANLN	anillin, actin binding protein	FALSE	Homo sapiens anillin, actin binding protein (ANLN), transcript variant 1, mRNA [NM_018685]	54443	GO:0007067|GO:0005826|GO:0000921|GO:0002244|GO:0000281|GO:0007096|GO:0005654|GO:0003779|GO:0015629|GO:0043231	36492646	chr7	36492587	+	hs|7p14.2	NM_018685	chr7:36492587-36492646	NM_018685	Hs.62180
A_23_P259586	-14.2963	-3.83757	14.2963	down	TTK	TTK protein kinase	FALSE	Homo sapiens TTK protein kinase (TTK), transcript variant 1, mRNA [NM_003318]	7272	GO:0005515|GO:0007094|GO:0008284|GO:0005819|GO:0010862|GO:0018108|GO:0005524|GO:0051304|GO:0016020|GO:0004674|GO:0004712|GO:0004713|GO:0007051|GO:0007052	80749489	chr6	80749430	+	hs|6q14.1	NM_003318	chr6:80749430-80749489	NM_003318	Hs.169840
A_32_P150891	-14.1992	-3.82773	14.1992	down	DIAPH3	diaphanous-related formin 3	FALSE	Homo sapiens diaphanous-related formin 3 (DIAPH3), transcript variant 1, mRNA [NM_001042517]	81624	GO:0030036|GO:0017048|GO:0005634|GO:0003779|GO:0007283|GO:0005829	60686214	chr13	60686155	-	hs|13q21.2	NM_001042517	chr13:60686214-60686155	NM_001042517	Hs.283127
A_33_P3221313	-14.1258	-3.82026	14.1258	down	CENPI	centromere protein I	FALSE	Homo sapiens centromere protein I (CENPI), mRNA [NM_006733]	2491	GO:0034080|GO:0005515|GO:0005737|GO:0006334|GO:0000776|GO:0007548|GO:0005654|GO:0005634|GO:0000278|GO:0005829	100417976	chrX	100417917	+	hs|Xq22.1	NM_006733	chrX:100417917-100417976	NM_006733	Hs.348920
A_33_P3311755	-14.0623	-3.81376	14.0623	down	KIF23	kinesin family member 23	FALSE	Homo sapiens kinesin family member 23 (KIF23), transcript variant 1, mRNA [NM_138555]	9493	GO:0005515|GO:0008017|GO:0051256|GO:0072686|GO:0005634|GO:0005829|GO:0000910|GO:0019886|GO:0016887|GO:0007018|GO:0005871|GO:0005813|GO:0000281|GO:0032467|GO:0000022|GO:0005874|GO:0005819|GO:0030496|GO:0003777|GO:0005524|GO:0045171|GO:0007596|GO:0008152|GO:0005654|GO:0097149|GO:0000278|GO:0005925	69738429	chr15	69738370	+	hs|15q23	NM_138555	chr15:69738370-69738429	NM_138555	Hs.270845
A_23_P96325	-14.0149	-3.80889	14.0149	down	ERCC6L	excision repair cross-complementation group 6-like	FALSE	Homo sapiens excision repair cross-complementation group 6-like (ERCC6L), mRNA [NM_017669]	54821	GO:0005515|GO:0005813|GO:0005886|GO:0004386|GO:0003677|GO:0005524|GO:0005829|GO:0005737|GO:0007067|GO:0016020|GO:0008152|GO:0000777|GO:0005654|GO:0000278|GO:0051301	71425169	chrX	71425110	-	hs|Xq13.1	NM_017669	chrX:71425169-71425110	NM_017669	Hs.47558
A_32_P62963	-14.0145	-3.80885	14.0145	down	KRT16P2	keratin 16 pseudogene 2	FALSE	Homo sapiens keratin 16 pseudogene 2 (KRT16P2), non-coding RNA [NR_029392]	400578		16734545	chr17	16734486	-	hs|17p11.2	NR_029392	chr17:16734545-16734486	NR_029392	Hs.723586
A_23_P144843	-13.9792	-3.80521	13.9792	down	ESM1	endothelial cell-specific molecule 1	FALSE	Homo sapiens endothelial cell-specific molecule 1 (ESM1), transcript variant 1, mRNA [NM_007036]	11082	GO:0008284|GO:0005178|GO:0005576|GO:0002040|GO:0001525|GO:0005171|GO:0001558|GO:0005520	54274617	chr5	54274558	-	hs|5q11.2	NM_007036	chr5:54274617-54274558	NM_007036	Hs.129944
A_23_P35219	-13.8783	-3.79476	13.8783	down	NEK2	NIMA-related kinase 2	FALSE	Homo sapiens NIMA-related kinase 2 (NEK2), transcript variant 1, mRNA [NM_002497]	4751	GO:0005515|GO:0005634|GO:0031145|GO:0046872|GO:0005829|GO:0005737|GO:0046777|GO:0007059|GO:0000086|GO:0090307|GO:0051321|GO:0000794|GO:0005813|GO:0007088|GO:0006996|GO:0051988|GO:0019903|GO:0001824|GO:0005874|GO:0046602|GO:0005730|GO:0030496|GO:0051225|GO:0005524|GO:0045171|GO:0043392|GO:0043234|GO:0000922|GO:0000070|GO:0007067|GO:0004672|GO:0004674|GO:0051299|GO:0000777|GO:0000776|GO:0006468|GO:…	211836920	chr1	211836861	-	hs|1q32.3	NM_002497	chr1:211836920-211836861	NM_002497	Hs.153704
A_23_P388812	-13.8224	-3.78894	13.8224	down	CKAP2L	cytoskeleton associated protein 2-like	FALSE	cytoskeleton associated protein 2-like [Source:HGNC Symbol;Acc:HGNC:26877] [ENST00000435431]	150468	GO:0005813|GO:0005737|GO:0000922	113495817	chr2	113495758	-	hs|2q13	AK097948	chr2:113495817-113495758		Hs.434250
A_23_P131866	-13.7705	-3.78351	13.7705	down	AURKA	aurora kinase A	FALSE	Homo sapiens aurora kinase A (AURKA), transcript variant 1, mRNA [NM_198433]	6790	GO:0005515|GO:0072686|GO:0072687|GO:0051642|GO:0046777|GO:0071539|GO:0031625|GO:0000780|GO:0005813|GO:0032465|GO:0019901|GO:0005819|GO:1900195|GO:0030496|GO:0045840|GO:0046605|GO:0035174|GO:0045120|GO:0000278|GO:0051301|GO:0032091|GO:0043146|GO:0048471|GO:0007100|GO:0032436|GO:0005634|GO:0051233|GO:0031145|GO:0005829|GO:0007057|GO:0031647|GO:0009948|GO:0000086|GO:0015630|GO:0043203|GO:0005876|GO:…	54945179	chr20	54945120	-	hs|20q13.2	NM_198433	chr20:54945179-54945120	NM_198433	Hs.250822
A_23_P361419	-13.6906	-3.77512	13.6906	down	DEPDC1B	DEP domain containing 1B	FALSE	Homo sapiens DEP domain containing 1B (DEPDC1B), transcript variant 1, mRNA [NM_018369]	55789	GO:0043547|GO:0051056|GO:0016477|GO:0007264|GO:0030177|GO:0005829|GO:0005096	59893300	chr5	59893241	-	hs|5q12.1	NM_018369	chr5:59893300-59893241	NM_018369	Hs.482233
A_23_P118834	-13.6805	-3.77405	13.6805	down	TOP2A	topoisomerase (DNA) II alpha 170kDa	FALSE	Homo sapiens topoisomerase (DNA) II alpha 170kDa (TOP2A), mRNA [NM_001067]	7153	GO:0005515|GO:0043130|GO:0000793|GO:0042826|GO:0000819|GO:0005634|GO:0042803|GO:0007059|GO:0040016|GO:0002244|GO:0045944|GO:0019035|GO:0008144|GO:0005080|GO:0045070|GO:0008094|GO:0043065|GO:0009330|GO:0003918|GO:0000287|GO:0046982|GO:0008301|GO:0005814|GO:0005730|GO:0000228|GO:0006312|GO:0008022|GO:0005524|GO:0003677|GO:0006974|GO:0045870|GO:0043234|GO:0003682|GO:0000712|GO:0030263|GO:0006268|GO:…	38545768	chr17	38545709	-	hs|17q21.2	NM_001067	chr17:38545768-38545709	NM_001067	Hs.156346
A_23_P34788	-13.6679	-3.77272	13.6679	down	KIF2C	kinesin family member 2C	FALSE	Homo sapiens kinesin family member 2C (KIF2C), transcript variant 1, mRNA [NM_006845]	11004	GO:0005515|GO:0005881|GO:0008283|GO:0005634|GO:0035371|GO:0005829|GO:0019886|GO:0051010|GO:0015630|GO:0016887|GO:0007019|GO:0007018|GO:0005871|GO:0030951|GO:0051983|GO:0019237|GO:0003777|GO:0005524|GO:0007067|GO:0016020|GO:0007596|GO:0008152|GO:0000777|GO:0000776|GO:0007080|GO:0000278|GO:0000775|GO:0051301	45233125	chr1	45233066	+	hs|1p34.1	NM_006845	chr1:45233066-45233125	NM_006845	Hs.720061
A_23_P167129	-13.6129	-3.76691	13.6129	down	HHIP	hedgehog interacting protein	FALSE	Homo sapiens hedgehog interacting protein (HHIP), mRNA [NM_022475]	64399	GO:0005515|GO:0060170|GO:0048038|GO:0009986|GO:0016901|GO:0005975|GO:0048705|GO:0045879|GO:0005576|GO:0009953|GO:0007224|GO:0007405|GO:0005737|GO:0060441|GO:0040036|GO:0005887|GO:0008270|GO:0009968|GO:0097108|GO:0055114	145658988	chr4	145658929	+	hs|4q31.21	NM_022475	chr4:145658929-145658988	NM_022475	Hs.507991
A_33_P3216008	-13.5675	-3.76208	13.5675	down	SKA3	spindle and kinetochore associated complex subunit 3	FALSE	Homo sapiens spindle and kinetochore associated complex subunit 3 (SKA3), transcript variant 1, mRNA [NM_145061]	221150	GO:0005515|GO:0007067|GO:0005737|GO:0000940|GO:0007059|GO:0031110|GO:0005876|GO:0051301	21727794	chr13	21727735	-	hs|13q12.11	NM_145061	chr13:21727794-21727735	NM_145061	Hs.88523
A_33_P3360216	-13.5371	-3.75885	13.5371	down	HIST1H2AI	histone cluster 1, H2ai	FALSE	Homo sapiens histone cluster 1, H2ai (HIST1H2AI), mRNA [NM_003509]	8329	GO:0005515|GO:0008150|GO:0046982|GO:0005634|GO:0019899|GO:0000786|GO:0003677|GO:0070062	27776445	chr6	27776386	+	hs|6p22.1	NM_003509	chr6:27776386-27776445	NM_003509	Hs.534035
A_23_P93258	-13.5019	-3.75509	13.5019	down	HIST1H3B	histone cluster 1, H3b	FALSE	Homo sapiens histone cluster 1, H3b (HIST1H3B), mRNA [NM_003537]	8358	GO:0005515|GO:0010467|GO:0046982|GO:0006325|GO:0006335|GO:0005576|GO:0005634|GO:0000228|GO:0003677|GO:0032776|GO:0043234|GO:0060968|GO:0016020|GO:0000183|GO:0007596|GO:0045814|GO:0040029|GO:0005654|GO:0000786|GO:0070062	26031981	chr6	26031922	-	hs|6p22.2	NM_003537	chr6:26031981-26031922	NM_003537	Hs.533292
A_23_P75071	-13.4719	-3.75188	13.4719	down	KIF20B	kinesin family member 20B	FALSE	Homo sapiens kinesin family member 20B (KIF20B), transcript variant 2, mRNA [NM_016195]	9585	GO:0008017|GO:0005813|GO:0007088|GO:0050699|GO:2001222|GO:0005874|GO:2000114|GO:0005730|GO:0005819|GO:0001843|GO:0003777|GO:0005524|GO:0005737|GO:0007067|GO:0070201|GO:0008152|GO:0005654|GO:0007050|GO:0016887|GO:0051301|GO:0007018	91534114	chr10	91534055	+	hs|10q23.31	NM_016195	chr10:91534055-91534114	NM_016195	Hs.240
A_23_P52017	-13.4625	-3.75087	13.4625	down	ASPM	asp (abnormal spindle) homolog, microcephaly associated (Drosophila)	FALSE	Homo sapiens asp (abnormal spindle) homolog, microcephaly associated (Drosophila) (ASPM), transcript variant 1, mRNA [NM_018136]	259266	GO:0097150|GO:0005516|GO:0021987|GO:0048477|GO:0090263|GO:0005874|GO:0002052|GO:0030496|GO:0005634|GO:0007283|GO:0045769|GO:0021873|GO:0072687|GO:0005737|GO:0007067|GO:0051661|GO:0048589|GO:0045665|GO:0090306|GO:0001764|GO:0008584	197053513	chr1	197053454	-	hs|1q31.3	NM_018136	chr1:197053513-197053454	NM_018136	Hs.121028
A_23_P19663	-13.4261	-3.74696	13.4261	down	CTGF	connective tissue growth factor	FALSE	Homo sapiens connective tissue growth factor (CTGF), mRNA [NM_001901]	1490	GO:0060401|GO:0005515|GO:0005801|GO:0010467|GO:0070278|GO:0006367|GO:0045597|GO:0046330|GO:0001558|GO:0005615|GO:0035988|GO:0030154|GO:0043231|GO:0001894|GO:0060548|GO:0070374|GO:0005938|GO:0032355|GO:0044255|GO:0005520|GO:0005794|GO:0034059|GO:0051385|GO:0032330|GO:0043280|GO:0070542|GO:0005178|GO:0001503|GO:0008544|GO:0032967|GO:0007229|GO:0001502|GO:0008543|GO:0051496|GO:0008083|GO:0048471|GO:…	132270189	chr6	132270130	-	hs|6q23.2	NM_001901	chr6:132270189-132270130	NM_001901	Hs.410037
A_23_P104651	-13.3188	-3.73539	13.3188	down	CDCA5	cell division cycle associated 5	FALSE	Homo sapiens cell division cycle associated 5 (CDCA5), mRNA [NM_080668]	113130	GO:0005515|GO:0007076|GO:0000790|GO:0005886|GO:0005694|GO:0005634|GO:0071922|GO:0005829|GO:0006302|GO:0008278|GO:0007067|GO:0000082|GO:0005737|GO:0003682|GO:0005654|GO:0007080|GO:0000278|GO:0000775|GO:0051301|GO:0007064	64845055	chr11	64844996	-	hs|11q13.1	NM_080668	chr11:64845055-64844996	NM_080668	Hs.434886
A_23_P411335	-13.1015	-3.71166	13.1015	down	SGOL2	shugoshin-like 2 (S. pombe)	FALSE	Homo sapiens shugoshin-like 2 (S. pombe) (SGOL2), transcript variant 1, mRNA [NM_152524]	151246	GO:0005515|GO:0030892|GO:0000777|GO:0005654|GO:0051754|GO:0000278|GO:0000775|GO:0051301|GO:0005829	201438572	chr2	201438513	+	hs|2q33.1	NM_152524	chr2:201438513-201438572	NM_152524	Hs.655182
A_23_P363174	-12.933	-3.69298	12.933	down	HIST1H2AL	histone cluster 1, H2al	FALSE	Homo sapiens histone cluster 1, H2al (HIST1H2AL), mRNA [NM_003511]	8332	GO:0005515|GO:0008150|GO:0046982|GO:0005634|GO:0019899|GO:0000786|GO:0003677|GO:0070062	27833561	chr6	27833502	+	hs|6p22.1	NM_003511	chr6:27833502-27833561	NM_003511	Hs.233568
A_33_P3309471	-12.9122	-3.69066	12.9122	down	PTPRQ	protein tyrosine phosphatase, receptor type, Q	FALSE	Homo sapiens protein tyrosine phosphatase, receptor type, Q (PTPRQ), mRNA [NM_001145026]	374462	GO:0045598|GO:0016021|GO:0035335|GO:0004725	81073798	chr12	81073739	+	hs|12q21.31	NM_001145026	chr12:81073739-81073798	NM_001145026	Hs.539284
A_23_P70249	-12.8939	-3.68862	12.8939	down	CDC25C	cell division cycle 25C	FALSE	Homo sapiens cell division cycle 25C (CDC25C), transcript variant 1, mRNA [NM_001790]	995	GO:0005515|GO:0048471|GO:0007088|GO:0019901|GO:0008283|GO:0050699|GO:0005634|GO:0000079|GO:0007283|GO:0035335|GO:0005829|GO:0006260|GO:0007067|GO:0000086|GO:0051726|GO:0016032|GO:0005654|GO:0000278|GO:0004725|GO:0051301	137621299	chr5	137621240	-	hs|5q31.2	NM_001790	chr5:137621299-137621240	NM_001790	Hs.656
A_23_P50108	-12.8525	-3.68397	12.8525	down	NDC80	NDC80 kinetochore complex component	FALSE	Homo sapiens NDC80 kinetochore complex component (NDC80), mRNA [NM_006101]	10403	GO:0005515|GO:0000132|GO:0005634|GO:0005829|GO:0051315|GO:0007067|GO:0000070|GO:0007059|GO:0016020|GO:0000942|GO:0000777|GO:0005200|GO:0000776|GO:0008608|GO:0000278|GO:0007052|GO:0031262|GO:0000775|GO:0051301	2610857	chr18	2610798	+	hs|18p11.32	NM_006101	chr18:2610798-2610857	NM_006101	Hs.414407
A_23_P99292	-12.8493	-3.68362	12.8493	down	RAD51AP1	RAD51 associated protein 1	FALSE	Homo sapiens RAD51 associated protein 1 (RAD51AP1), transcript variant 2, mRNA [NM_006479]	10635	GO:0005515|GO:0006281|GO:0003690|GO:0003697|GO:0000724|GO:0003723|GO:0005634|GO:0071479|GO:0010569	4668241	chr12	4668182	+	hs|12p13.32	NM_006479	chr12:4668182-4668241	NM_006479	Hs.730696
A_33_P3326210	-12.8276	-3.68118	12.8276	down	ESCO2	establishment of sister chromatid cohesion N-acetyltransferase 2	FALSE	Homo sapiens establishment of sister chromatid cohesion N-acetyltransferase 2 (ESCO2), mRNA [NM_001017420]	157570	GO:0001741|GO:0005794|GO:0010369|GO:0034421|GO:0035861|GO:0005634|GO:0046872|GO:0006302|GO:0004468|GO:0007059|GO:0002244|GO:0005654|GO:0071168|GO:0000278|GO:0031618|GO:0000785|GO:0006275	27660889	chr8	27660830	+	hs|8p21.1	NM_001017420	chr8:27660830-27660889	NM_001017420	Hs.99480
A_32_P62997	-12.8224	-3.6806	12.8224	down	PBK	PDZ binding kinase	FALSE	Homo sapiens PDZ binding kinase (PBK), transcript variant 1, mRNA [NM_018492]	55872	GO:0005515|GO:0034644|GO:0007067|GO:0004674|GO:0050728|GO:0001933|GO:0006468|GO:0032435|GO:0005575|GO:0032873|GO:0005524	27667843	chr8	27667784	-	hs|8p21.1	NM_018492	chr8:27667843-27667784	NM_018492	Hs.104741
A_23_P150935	-12.7982	-3.67787	12.7982	down	TROAP	trophinin associated protein	FALSE	Homo sapiens trophinin associated protein (TROAP), transcript variant 1, mRNA [NM_005480]	10024	GO:0005515|GO:0005737|GO:0007155	49725475	chr12	49725416	+	hs|12q13.12	NM_005480	chr12:49725416-49725475	NM_005480	Hs.524399
A_23_P110531	-12.5021	-3.64409	12.5021	down	FST	follistatin	FALSE	Homo sapiens follistatin (FST), transcript variant FST344, mRNA [NM_013409]	10468	GO:0005515|GO:0007389|GO:0007276|GO:0043395|GO:0032926|GO:0005576|GO:0005634|GO:0000122|GO:0030509|GO:0043616|GO:0031069|GO:0008585|GO:0051798|GO:0001501|GO:0005737|GO:0048185|GO:0002244|GO:0042475|GO:0045596|GO:0004871	52780896	chr5	52780837	+	hs|5q11.2	NM_013409	chr5:52780837-52780896	NM_013409	Hs.9914
A_33_P3372413	-12.4276	-3.63548	12.4276	down			FALSE	Q6NUR1_HUMAN (Q6NUR1) Chromosome condensation protein G, partial (11%) [THC2788944]			30297951	chr15	30297892	+	hs|15q13.1		chr15:30297892-30297951
A_23_P379614	-12.3102	-3.62179	12.3102	down	OIP5	Opa interacting protein 5	FALSE	Homo sapiens Opa interacting protein 5 (OIP5), mRNA [NM_007280]	11339	GO:0005515|GO:0015030|GO:0010369|GO:0006334|GO:0005634|GO:0034080|GO:0005737|GO:0007067|GO:0007154|GO:0005654|GO:0000785|GO:0000775|GO:0051301	41601624	chr15	41601565	-	hs|15q15.1	NM_007280	chr15:41601624-41601565	NM_007280	Hs.661645
A_24_P225970	-12.3061	-3.6213	12.3061	down	SGOL1	shugoshin-like 1 (S. pombe)	FALSE	Homo sapiens shugoshin-like 1 (S. pombe) (SGOL1), transcript variant A1, mRNA [NM_001012409]	151648	GO:0005515|GO:0000780|GO:0010457|GO:0005813|GO:0030892|GO:0005829|GO:0007067|GO:0000922|GO:0005737|GO:0007059|GO:0045132|GO:0000777|GO:0000776|GO:0000779|GO:0005654|GO:0019900|GO:0008608|GO:0000278|GO:0000775|GO:0051301	20212674	chr3	20212615	-	hs|3p24.3	NM_001012409	chr3:20212674-20212615	NM_001012409	Hs.105153
A_33_P3378880	-12.3	-3.62058	12.3	down	HIST1H4C	histone cluster 1, H4c	FALSE	histone cluster 1, H4c [Source:HGNC Symbol;Acc:HGNC:4787] [ENST00000377803]	8364	GO:0005515|GO:0010467|GO:0006325|GO:0005634|GO:0045653|GO:0000723|GO:0000183|GO:0000786|GO:0070062|GO:0035574|GO:0035575|GO:0046982|GO:0006334|GO:0006335|GO:0005576|GO:0006336|GO:0000228|GO:0003677|GO:0032776|GO:0034080|GO:0043234|GO:0016020|GO:0045814|GO:0040029|GO:0005654|GO:0000278	26104189	chr6	26104130	+	hs|6p22.2	BC130558	chr6:26104130-26104189		Hs.46423
A_23_P253524	-12.292	-3.61965	12.292	down	CENPE	centromere protein E, 312kDa	FALSE	Homo sapiens centromere protein E, 312kDa (CENPE), transcript variant 1, mRNA [NM_001813]	1062	GO:0005515|GO:0008017|GO:0005634|GO:0007079|GO:0005829|GO:0019886|GO:0051315|GO:0005737|GO:0051382|GO:0007059|GO:0045860|GO:0015630|GO:0016887|GO:0007018|GO:0005871|GO:0005694|GO:0005874|GO:0030496|GO:0007275|GO:0003777|GO:0005524|GO:0000940|GO:0016020|GO:0007596|GO:0008152|GO:0000776|GO:0043515|GO:0000779|GO:0030071|GO:0000778|GO:0007080|GO:0000278|GO:0000775|GO:0051301	104027398	chr4	104027339	-	hs|4q24	NM_001813	chr4:104027398-104027339	NM_001813	Hs.75573
A_33_P3267814	-12.2774	-3.61793	12.2774	down	MICAL3	microtubule associated monooxygenase, calponin and LIM domain containing 3	FALSE	Homo sapiens microtubule associated monooxygenase, calponin and LIM domain containing 3 (MICAL3), transcript variant 2, mRNA [NM_001136004]	57553	GO:0017137|GO:0005886|GO:0003779|GO:0005634|GO:0006887|GO:0071949|GO:0005737|GO:0007010|GO:0016709|GO:0030042|GO:0005654|GO:0008270|GO:0005856|GO:0055114	18343047	chr22	18342988	-	hs|22q11.21	NM_001136004	chr22:18343047-18342988	NM_001136004	Hs.528024
A_33_P3901921	-12.2762	-3.6178	12.2762	down	PARPBP	PARP1 binding protein	FALSE	Homo sapiens PARP1 binding protein (PARPBP), mRNA [NM_017915]	55010	GO:0005515|GO:2000042|GO:0005737|GO:0006281|GO:0005654|GO:0003677|GO:0000785	102542076	chr12	102542017	+	hs|12q23.2	NM_017915	chr12:102542017-102542076	NM_017915	Hs.330663
A_23_P119196	-12.2414	-3.61369	12.2414	down	KLF2	Kruppel-like factor 2	FALSE	Homo sapiens Kruppel-like factor 2 (KLF2), mRNA [NM_016270]	10365	GO:0051247|GO:0005515|GO:0071499|GO:0070301|GO:0003700|GO:0032715|GO:0005634|GO:0071409|GO:0001701|GO:0046872|GO:0006351|GO:0060509|GO:0043565|GO:0000902|GO:0043249|GO:0035264|GO:0045944|GO:0071356|GO:0071347|GO:0040029|GO:0036003	16438305	chr19	16438246	+	hs|19p13.11	NM_016270	chr19:16438246-16438305	NM_016270	Hs.744182
A_33_P3340468	-12.1355	-3.60116	12.1355	down	CENPI	centromere protein I	FALSE	centromere protein I [Source:HGNC Symbol;Acc:HGNC:3968] [ENST00000403304]	2491	GO:0034080|GO:0005515|GO:0005737|GO:0006334|GO:0000776|GO:0007548|GO:0005654|GO:0005634|GO:0000278|GO:0005829	100353497	chrX	100353438	+	hs|Xq22.1	XM_005262111	chrX:100353438-100353497	XM_005262111	Hs.348920
A_23_P118174	-12.0835	-3.59497	12.0835	down	PLK1	polo-like kinase 1	FALSE	polo-like kinase 1 [Source:HGNC Symbol;Acc:HGNC:9077] [ENST00000562272]	5347	GO:0005515|GO:0007077|GO:0008017|GO:0010997|GO:0000910|GO:0018105|GO:0016301|GO:0051443|GO:0046677|GO:0010800|GO:0005813|GO:0006996|GO:0019901|GO:0000281|GO:0005819|GO:0043393|GO:0030496|GO:0000122|GO:0000070|GO:0000922|GO:0000776|GO:0005654|GO:0030071|GO:0000278|GO:0007094|GO:0007092|GO:0016567|GO:0008283|GO:0045736|GO:0001578|GO:0031572|GO:0032436|GO:0005634|GO:0051233|GO:0031145|GO:0005829|GO:…	23701212	chr16	23700970	+	hs|16p12.2	AK310544	chr16:23700970-23701212		Hs.592049
A_23_P124417	-11.9976	-3.58467	11.9976	down	BUB1	BUB1 mitotic checkpoint serine/threonine kinase	FALSE	Homo sapiens BUB1 mitotic checkpoint serine/threonine kinase (BUB1), transcript variant 1, mRNA [NM_004336]	699	GO:0005515|GO:0007094|GO:0007093|GO:0008283|GO:0005829|GO:0005737|GO:0007059|GO:0071173|GO:0016032|GO:0000780|GO:0051983|GO:0006915|GO:2001244|GO:0005524|GO:0007067|GO:0004672|GO:0016020|GO:0004674|GO:0000777|GO:0000776|GO:0006468|GO:0005654|GO:0000278|GO:0007063|GO:0051301	111397340	chr2	111395699	-	hs|2q13	NM_004336	chr2:111397340-111395699	NM_004336	Hs.469649
A_23_P96158	-11.8462	-3.56635	11.8462	down	KRT17	keratin 17, type I	FALSE	Homo sapiens keratin 17, type I (KRT17), mRNA [NM_000422]	3872	GO:0005515|GO:0005882|GO:0042289|GO:0045109|GO:0030307|GO:0031424|GO:0045727|GO:0071944|GO:0031069|GO:0007165|GO:0051798|GO:0005737|GO:0008544|GO:0005200|GO:0032395|GO:0070062	39777035	chr17	39776976	-	hs|17q21.2	NM_000422	chr17:39777035-39776976	NM_000422	Hs.2785
A_33_P3307903	-11.8324	-3.56468	11.8324	down	CDKN3	cyclin-dependent kinase inhibitor 3	FALSE	Homo sapiens cyclin-dependent kinase inhibitor 3 (CDKN3), transcript variant 1, mRNA [NM_005192]	1033	GO:0005515|GO:0048471|GO:0005737|GO:0000082|GO:0008285|GO:0007050|GO:0008138|GO:0004722|GO:0000079|GO:0035335|GO:0004725	54866693	chr14	54866634	+	hs|14q22.2	NM_005192	chr14:54866634-54866693	NM_005192	Hs.84113
A_24_P193592	-11.8049	-3.56131	11.8049	down	CCNF	cyclin F	FALSE	Homo sapiens cyclin F (CCNF), mRNA [NM_001761]	899	GO:0005515|GO:0007067|GO:0016567|GO:0005814|GO:0010826|GO:0005634|GO:0001890|GO:0031146|GO:0000320|GO:0019005|GO:0051301	2507945	chr16	2507886	+	hs|16p13.3	NM_001761	chr16:2507886-2507945	NM_001761	Hs.1973
A_33_P3412613	-11.6292	-3.53968	11.6292	down	TMPO	thymopoietin	FALSE	Homo sapiens thymopoietin (TMPO), transcript variant 2, mRNA [NM_001032283]	7112	GO:0005515|GO:0031965|GO:0006355|GO:0005737|GO:0016020|GO:0005637|GO:0005634|GO:0016021|GO:0005635|GO:0003677|GO:0000785|GO:0005521	98942391	chr12	98942332	+	hs|12q23.1	NM_001032283	chr12:98942332-98942391	NM_001032283	Hs.11355
A_23_P88331	-11.5774	-3.53324	11.5774	down	DLGAP5	discs, large (Drosophila) homolog-associated protein 5	FALSE	Homo sapiens discs, large (Drosophila) homolog-associated protein 5 (DLGAP5), transcript variant 1, mRNA [NM_014750]	9787	GO:0005515|GO:0005737|GO:0005815|GO:0008283|GO:0016311|GO:0045842|GO:0007267|GO:0031616|GO:0005634|GO:0004721|GO:0007079	55615172	chr14	55615113	-	hs|14q22.3	NM_014750	chr14:55615172-55615113	NM_014750	Hs.77695
A_24_P113144	-11.5034	-3.52399	11.5034	down	ATAD5	ATPase family, AAA domain containing 5	FALSE	Homo sapiens ATPase family, AAA domain containing 5 (ATAD5), mRNA [NM_024857]	79915	GO:0005634|GO:0005524|GO:0006974	29221654	chr17	29221595	+	hs|17q11.2	NM_024857	chr17:29221595-29221654	NM_024857	Hs.528902
A_23_P212844	-11.4643	-3.51907	11.4643	down	TACC3	transforming, acidic coiled-coil containing protein 3	FALSE	Homo sapiens transforming, acidic coiled-coil containing protein 3 (TACC3), mRNA [NM_006342]	10460	GO:0005515|GO:0030097|GO:0001666|GO:0005813|GO:0021987|GO:0008283|GO:0019904|GO:0000226|GO:0030953|GO:0032886|GO:0042994|GO:0005737|GO:0022027|GO:0051726|GO:0022008	1741717	chr4	1741478	+	hs|4p16.3	NM_006342	chr4:1741478-1741717	NM_006342	Hs.104019
A_23_P148475	-11.2498	-3.49182	11.2498	down	KIF4A	kinesin family member 4A	FALSE	Homo sapiens kinesin family member 4A (KIF4A), mRNA [NM_012310]	24137	GO:0005515|GO:0008017|GO:0051256|GO:0016363|GO:0005829|GO:0019886|GO:0005737|GO:0007411|GO:0008574|GO:0005876|GO:0016887|GO:0007018|GO:0005871|GO:0006996|GO:0005694|GO:0000281|GO:0030496|GO:0003777|GO:0005524|GO:0003677|GO:0016020|GO:0007596|GO:0008152|GO:0005654|GO:0008089	69640206	chrX	69640147	+	hs|Xq13.1	NM_012310	chrX:69640147-69640206	NM_012310	Hs.648326
A_23_P200310	-11.2217	-3.48822	11.2217	down	DEPDC1	DEP domain containing 1	FALSE	Homo sapiens DEP domain containing 1 (DEPDC1), transcript variant 2, mRNA [NM_017779]	55635	GO:0043547|GO:0035556|GO:0005515|GO:0017053|GO:0005654|GO:0005634|GO:0045892|GO:0006351|GO:0005096	68939848	chr1	68939814	-	hs|1p31.2	NM_017779	chr1:68939848-68939814	NM_017779	Hs.445098
A_24_P96780	-11.1755	-3.48227	11.1755	down	CENPF	centromere protein F, 350/400kDa	FALSE	Homo sapiens centromere protein F, 350/400kDa (CENPF), mRNA [NM_016343]	1063	GO:0005515|GO:0007094|GO:0048471|GO:0008283|GO:0005634|GO:0005635|GO:0015031|GO:0042803|GO:0030154|GO:0016363|GO:0005829|GO:0005737|GO:0051382|GO:0007059|GO:0000086|GO:0051726|GO:0016202|GO:0000785|GO:0051310|GO:0042493|GO:0010389|GO:0005819|GO:0030496|GO:0008022|GO:0000940|GO:0000922|GO:0007067|GO:0045502|GO:0007517|GO:0071897|GO:0003682|GO:0000776|GO:0005654|GO:0045120|GO:0000278|GO:0045892|GO:…	214826298	chr1	214826239	+	hs|1q41	NM_016343	chr1:214826239-214826298	NM_016343	Hs.497741
A_23_P429491	-11.1269	-3.47598	11.1269	down	DDIAS	DNA damage-induced apoptosis suppressor	FALSE	Homo sapiens DNA damage-induced apoptosis suppressor (DDIAS), mRNA [NM_145018]	220042	GO:0071850|GO:0030097|GO:0034644|GO:0005737|GO:0071345|GO:2000270|GO:0007286|GO:0071447|GO:0006915|GO:0005634|GO:0071480|GO:0006974	82645410	chr11	82645351	+	hs|11q14.1	NM_145018	chr11:82645351-82645410	NM_145018	Hs.165607
A_23_P65041	-11.0921	-3.47146	11.0921	down	RACGAP1P	Rac GTPase activating protein 1 pseudogene	FALSE	Homo sapiens Rac GTPase activating protein 1 pseudogene (RACGAP1P), non-coding RNA [NR_026583]	83956		45456428	chr12	45456401	-	hs|12q12	NR_026583	chr12:45456428-45456401	NR_026583	Hs.650500
A_23_P118246	-11.0741	-3.46911	11.0741	down	GINS2	GINS complex subunit 2 (Psf2 homolog)	FALSE	Homo sapiens GINS complex subunit 2 (Psf2 homolog) (GINS2), mRNA [NM_016095]	51659	GO:0005515|GO:0006271|GO:0005654|GO:0000278	85711713	chr16	85711654	-	hs|16q24.1	NM_016095	chr16:85711713-85711654	NM_016095	Hs.433180
A_23_P149200	-11.0312	-3.46352	11.0312	down	CDC20	cell division cycle 20	FALSE	Homo sapiens cell division cycle 20 (CDC20), mRNA [NM_001255]	991	GO:0005515|GO:0007094|GO:0090129|GO:0008284|GO:0048471|GO:0016567|GO:0005634|GO:0031145|GO:0005829|GO:0051488|GO:0005737|GO:0031915|GO:0005680|GO:0005813|GO:0005819|GO:0051437|GO:0051436|GO:0008022|GO:0051439|GO:0040020|GO:0007067|GO:0007049|GO:0000922|GO:0050773|GO:0005654|GO:0000278|GO:0019899|GO:0051301	43826596	chr1	43826537	+	hs|1p34.2	NM_001255	chr1:43826537-43826596	NM_001255	Hs.524947
A_24_P349965	-10.9056	-3.447	10.9056	down	TCF19	transcription factor 19	FALSE	Homo sapiens transcription factor 19 (TCF19), transcript variant 1, mRNA [NM_007109]	6941	GO:0003700|GO:0006357|GO:0008283|GO:0008270|GO:0005634|GO:0006351	31131858	chr6	31131799	+	hs|6p21.33	NM_007109	chr6:31131799-31131858	NM_007109	Hs.584807
A_24_P13041	-10.8762	-3.44311	10.8762	down	RTKN2	rhotekin 2	FALSE	Homo sapiens rhotekin 2 (RTKN2), transcript variant 1, mRNA [NM_145307]	219790	GO:0030097|GO:0007165|GO:0008284|GO:0005886	63953284	chr10	63953225	-	hs|10q21.2	NM_145307	chr10:63953284-63953225	NM_145307	Hs.58559
A_24_P314571	-10.8607	-3.44105	10.8607	down	SPC24	SPC24, NDC80 kinetochore complex component	FALSE	SPC24, NDC80 kinetochore complex component [Source:HGNC Symbol;Acc:HGNC:26913] [ENST00000592540]	147841	GO:0005515|GO:0007067|GO:0005730|GO:0000777|GO:0005634|GO:0000278|GO:0031262|GO:0051301|GO:0005829	11257053	chr19	11256994	-	hs|19p13.2	AK075287	chr19:11257053-11256994		Hs.381225
A_23_P258493	-10.7819	-3.43054	10.7819	down	LMNB1	lamin B1	FALSE	Homo sapiens lamin B1 (LMNB1), transcript variant 1, mRNA [NM_005573]	4001	GO:0031965|GO:0016020|GO:0043274|GO:0005198|GO:0006915|GO:0005637|GO:0005654|GO:0005635|GO:0006921|GO:0005638	126172542	chr5	126172483	+	hs|5q23.2	NM_005573	chr5:126172483-126172542	NM_005573	Hs.89497
A_23_P121064	-10.7734	-3.4294	10.7734	down	PTX3	pentraxin 3, long	FALSE	Homo sapiens pentraxin 3, long (PTX3), mRNA [NM_002852]	5806	GO:0050766|GO:0006954|GO:0046597|GO:0045087|GO:0001849|GO:0046790|GO:0005576|GO:0001872|GO:0005615|GO:0001878|GO:0008228|GO:0045429	157161028	chr3	157160969	+	hs|3q25.32	NM_002852	chr3:157160969-157161028	NM_002852	Hs.591286
A_32_P224234	-10.7615	-3.42781	10.7615	down	LOC645195	uncharacterized LOC645195	FALSE	Homo sapiens cDNA FLJ41456 fis, clone BRSTN2012320. [AK123450]	645195		65721517	chr1	65721458	+	hs|1p31.3	AK123450	chr1:65721458-65721517		Hs.536063
A_23_P43157	-10.7094	-3.42081	10.7094	down	MYBL1	v-myb avian myeloblastosis viral oncogene homolog-like 1	FALSE	Homo sapiens v-myb avian myeloblastosis viral oncogene homolog-like 1 (MYBL1), transcript variant 1, mRNA [NM_001080416]	4603	GO:0010467|GO:0001077|GO:0045944|GO:0003682|GO:0034587|GO:0005634|GO:0045893|GO:0000978|GO:0006351	67474765	chr8	67474706	-	hs|8q13.1	NM_001080416	chr8:67474765-67474706	NM_001080416	Hs.445898
A_23_P155765	-10.7078	-3.42059	10.7078	down	HMGB2	high mobility group box 2	FALSE	Homo sapiens high mobility group box 2 (HMGB2), transcript variant 1, mRNA [NM_002129]	3148	GO:0005515|GO:0000793|GO:0048471|GO:0003700|GO:0044212|GO:0007289|GO:0006325|GO:0005634|GO:0005615|GO:0032075|GO:0006921|GO:0045654|GO:0005737|GO:0003690|GO:0050786|GO:0003697|GO:0045944|GO:0006338|GO:0033151|GO:0006357|GO:0008301|GO:0019904|GO:0006334|GO:0006915|GO:0048545|GO:0042056|GO:0003677|GO:0050918|GO:0003684|GO:0043234|GO:0071222|GO:0051103|GO:0001938|GO:0060326|GO:0045648|GO:0006309|GO:…	174253072	chr4	174253013	-	hs|4q34.1	NM_002129	chr4:174253072-174253013	NM_002129	Hs.434953
A_23_P126212	-10.67	-3.41549	10.67	down	CLSPN	claspin	FALSE	Homo sapiens claspin (CLSPN), transcript variant 1, mRNA [NM_022111]	63967	GO:0005515|GO:0010997|GO:0031572|GO:0006915|GO:0003677|GO:0006921|GO:0006260|GO:0032147|GO:0006281|GO:0018105|GO:0005654|GO:0000077|GO:0033314	36204176	chr1	36204117	-	hs|1p34.3	NM_022111	chr1:36204176-36204117	NM_022111	Hs.175613
A_23_P143994	-10.6533	-3.41323	10.6533	down	FANCD2	Fanconi anemia, complementation group D2	FALSE	Homo sapiens Fanconi anemia, complementation group D2 (FANCD2), transcript variant 2, mRNA [NM_001018115]	2177	GO:0007129|GO:0005515|GO:0000793|GO:0006281|GO:0005794|GO:0070182|GO:0007276|GO:0005654|GO:0010332|GO:0043231	10143065	chr3	10143006	+	hs|3p25.3	NM_001018115	chr3:10143006-10143065	NM_001018115	Hs.208388
A_23_P325040	-10.6242	-3.40928	10.6242	down	TMPO	thymopoietin	FALSE	Homo sapiens thymopoietin (TMPO), transcript variant 1, mRNA [NM_003276]	7112	GO:0005515|GO:0031965|GO:0006355|GO:0005737|GO:0016020|GO:0005637|GO:0005634|GO:0016021|GO:0005635|GO:0003677|GO:0000785|GO:0005521	98928319	chr12	98928260	+	hs|12q23.1	NM_003276	chr12:98928260-98928319	NM_003276	Hs.11355
A_24_P351466	-10.5957	-3.4054	10.5957	down	KIAA1524	KIAA1524	FALSE	Homo sapiens KIAA1524 (KIAA1524), mRNA [NM_020890]	57650	GO:0005515|GO:2000179|GO:0005737|GO:0005886|GO:0016021|GO:0007283	108269504	chr3	108269445	-	hs|3q13.13	NM_020890	chr3:108269504-108269445	NM_020890	Hs.591308
A_23_P163481	-10.5745	-3.40251	10.5745	down	BUB1B	BUB1 mitotic checkpoint serine/threonine kinase B	FALSE	Homo sapiens BUB1 mitotic checkpoint serine/threonine kinase B (BUB1B), mRNA [NM_001211]	701	GO:0005515|GO:0007094|GO:0007093|GO:0048471|GO:0008283|GO:0034501|GO:0051233|GO:0031145|GO:0005829|GO:0005737|GO:0005680|GO:0007091|GO:0005815|GO:0006915|GO:0051436|GO:0005524|GO:0051439|GO:0000940|GO:0007067|GO:0004672|GO:0004674|GO:0000777|GO:0000776|GO:0006468|GO:0000778|GO:0000278|GO:0051301	40512887	chr15	40512828	+	hs|15q15.1	NM_001211	chr15:40512828-40512887	NM_001211	Hs.513645
A_23_P206059	-10.4748	-3.38886	10.4748	down	PRC1	protein regulator of cytokinesis 1	FALSE	Homo sapiens protein regulator of cytokinesis 1 (PRC1), transcript variant 1, mRNA [NM_003981]	9055	GO:0005515|GO:0008017|GO:0019901|GO:0005886|GO:0000022|GO:0005819|GO:0005634|GO:0042802|GO:0000910|GO:0000922|GO:0005737|GO:0015630|GO:0005654|GO:0005876|GO:0019894	91509485	chr15	91509426	-	hs|15q26.1	NM_003981	chr15:91509485-91509426	NM_003981	Hs.366401
A_32_P183218	-10.4599	-3.38679	10.4599	down	ZNF367	zinc finger protein 367	FALSE	Homo sapiens zinc finger protein 367 (ZNF367), mRNA [NM_153695]	195828	GO:0003700|GO:0006357|GO:0005654|GO:0005634|GO:0003677|GO:0046872|GO:0006351	99148471	chr9	99148412	-	hs|9q22.32	NM_153695	chr9:99148471-99148412	NM_153695	Hs.494557
A_23_P25069	-10.3333	-3.36923	10.3333	down	OVOS2	ovostatin 2	FALSE		144203	GO:0010951|GO:0004867|GO:0005615	31267800	chr12	31267369	-	hs|12p11.21	XR_424313	chr12:31267800-31267369	XR_424313	Hs.524331
A_19_P00321758	-10.3102	-3.366	10.3102	down			FALSE				167394439	chr6	167394380	-	hs|6q27		chr6:167394439-167394380
A_23_P213336	-10.2661	-3.35981	10.2661	down	FGF1	fibroblast growth factor 1 (acidic)	FALSE	Homo sapiens fibroblast growth factor 1 (acidic) (FGF1), transcript variant 1, mRNA [NM_000800]	2246	GO:0005515|GO:0008286|GO:0008284|GO:0030324|GO:0001759|GO:0005615|GO:0009653|GO:0005829|GO:0034605|GO:0007173|GO:0043406|GO:0045944|GO:0051781|GO:0070374|GO:0005938|GO:0008201|GO:0050679|GO:0048011|GO:0030335|GO:0060681|GO:0048015|GO:0005730|GO:0005578|GO:2000544|GO:0005576|GO:0005104|GO:0007275|GO:0001525|GO:0045766|GO:0044548|GO:0007165|GO:0008543|GO:0045087|GO:0030544|GO:0005654|GO:0072163|GO:…	141974871	chr5	141974812	-	hs|5q31.3	NM_000800	chr5:141974871-141974812	NM_000800	Hs.483635
A_33_P3346891	-10.2487	-3.35737	10.2487	down	MYBL1	v-myb avian myeloblastosis viral oncogene homolog-like 1	FALSE	Homo sapiens v-myb avian myeloblastosis viral oncogene homolog-like 1 (MYBL1), transcript variant 3, mRNA [NM_001294282]	4603	GO:0010467|GO:0001077|GO:0045944|GO:0003682|GO:0034587|GO:0005634|GO:0045893|GO:0000978|GO:0006351	67514728	chr8	67514669	-	hs|8q13.1	NM_001294282	chr8:67514728-67514669	NM_001294282	Hs.445898
A_33_P3333187	-10.203	-3.35092	10.203	down			FALSE				143906039	chr1	143905980	-	hs|1q21.1		chr1:143906039-143905980
A_33_P3350488	-10.179	-3.34753	10.179	down	NUSAP1	nucleolar and spindle associated protein 1	FALSE	Homo sapiens nucleolar and spindle associated protein 1 (NUSAP1), transcript variant 1, mRNA [NM_016359]	51203	GO:0008017|GO:0007076|GO:0005737|GO:0000070|GO:0005694|GO:0000281|GO:0040001|GO:0005730|GO:0045840|GO:0005876|GO:0005634|GO:0003677	41673237	chr15	41673178	+	hs|15q15.1	NM_016359	chr15:41673178-41673237	NM_016359	Hs.615092
A_19_P00802201	-10.157	-3.3444	10.157	down			FALSE	CCNB2 pseudogene 1 [Source:HGNC Symbol;Acc:HGNC:50850] [ENST00000399411]			7949008	chr7	7948949	-	hs|7p21.3		chr7:7949008-7948949
A_23_P57588	-10.145	-3.3427	10.145	down	GTSE1	G-2 and S-phase expressed 1	FALSE	Homo sapiens G-2 and S-phase expressed 1 (GTSE1), mRNA [NM_016426]	51512	GO:0005515|GO:0005881|GO:0003674|GO:0016020|GO:0007017|GO:0006977	46725450	chr22	46725391	+	hs|22q13.31	NM_016426	chr22:46725391-46725450	NM_016426	Hs.386189
A_23_P80902	-10.115	-3.33842	10.115	down	KIF15	kinesin family member 15	FALSE	Homo sapiens kinesin family member 15 (KIF15), mRNA [NM_020242]	56992	GO:0008017|GO:0005813|GO:0005871|GO:0005873|GO:0008283|GO:0005874|GO:0005819|GO:0003777|GO:0003677|GO:0005524|GO:0005829|GO:0019886|GO:0003774|GO:0007067|GO:0016020|GO:0007596|GO:0008152|GO:0016887|GO:0007018	44894445	chr3	44894386	+	hs|3p21.31	NM_020242	chr3:44894386-44894445	NM_020242	Hs.658939
A_23_P155989	-10.0152	-3.32412	10.0152	down	CENPK	centromere protein K	FALSE	Homo sapiens centromere protein K (CENPK), transcript variant 1, mRNA [NM_022145]	64105	GO:0034080|GO:0045944|GO:0006334|GO:0000777|GO:0005654|GO:0000278|GO:0005829	64813872	chr5	64813813	-	hs|5q12.3	NM_022145	chr5:64813872-64813813	NM_022145	Hs.529778
A_23_P342138	-10.0059	-3.32278	10.0059	down	ADAMTSL1	ADAMTS-like 1	FALSE	Homo sapiens ADAMTS-like 1 (ADAMTSL1), transcript variant 4, mRNA [NM_001040272]	92949	GO:0006493|GO:0006508|GO:0005578|GO:0005788|GO:0008270|GO:0036066|GO:0044267|GO:0008237|GO:0043687	18910252	chr9	18910193	+	hs|9p22.1	NM_001040272	chr9:18910193-18910252	NM_001040272	Hs.741483
A_33_P3339375	-9.92377	-3.31089	9.92377	down	ARHGAP11B	Rho GTPase activating protein 11B	FALSE	Homo sapiens Rho GTPase activating protein 11B (ARHGAP11B), mRNA [NM_001039841]	89839	GO:0043547|GO:0051056|GO:0007264|GO:0005829|GO:0005096	30927820	chr15	30927761	+	hs|15q13.2	NM_001039841	chr15:30927761-30927820	NM_001039841	Hs.659621
A_33_P3351999	-9.92201	-3.31063	9.92201	down			FALSE	XM_363028 predicted protein {Magnaporthe grisea 70-15} (exp=0; wgp=1; cg=0), partial (4%) [THC2642375]			52043718	chr14	52043659	+	hs|14q22.1		chr14:052043659-052043718
A_32_P167904	-9.86222	-3.30191	9.86222	down	ZNF681	zinc finger protein 681	FALSE	Homo sapiens zinc finger protein 681 (ZNF681), mRNA [NM_138286]	148213	GO:0006355|GO:0003700|GO:0005634|GO:0003677|GO:0046872|GO:0006351	23922803	chr19	23922744	-	hs|19p12	NM_138286	chr19:23922803-23922744	NM_138286	Hs.399952
A_24_P358146	-9.85962	-3.30153	9.85962	down			FALSE				281458	chr16	281399	+	hs|16p13.3		chr16:281399-281458
A_33_P3268472	-9.82392	-3.2963	9.82392	down	CTSC	cathepsin C	FALSE	Homo sapiens cathepsin C (CTSC), transcript variant 3, mRNA [NM_001114173]	1075	GO:0005515|GO:0031404|GO:0005794|GO:0010033|GO:0004252|GO:0019902|GO:0005783|GO:2001235|GO:0007568|GO:0051087|GO:0006915|GO:0043621|GO:0005615|GO:0005764|GO:0042802|GO:0016505|GO:0006955|GO:0016020|GO:0001913|GO:0006508|GO:0008234|GO:0070062	88061340	chr11	88061281	-	hs|11q14.2	NM_001114173	chr11:88061340-88061281	NM_001114173	Hs.128065
A_33_P3404221	-9.74345	-3.28443	9.74345	down			FALSE				68944643	chr1	68944584	-	hs|1p31.2		chr1:068944643-068944584
A_24_P282237	-9.73229	-3.28278	9.73229	down	PRIM2	primase, DNA, polypeptide 2 (58kDa)	FALSE	Homo sapiens primase, DNA, polypeptide 2 (58kDa) (PRIM2), transcript variant 1, mRNA [NM_000947]	5558	GO:0051539|GO:0003896|GO:0003677|GO:0046872|GO:0000082|GO:0006271|GO:0000723|GO:0006270|GO:0000722|GO:0006269|GO:0005654|GO:0000278|GO:0032201	57190841	chr6	57190782	+	hs|6p11.2	NM_000947	chr6:57190782-57190841	NM_000947	Hs.654580
A_23_P3302	-9.7195	-3.28088	9.7195	down	MNS1	meiosis-specific nuclear structural 1	FALSE	Homo sapiens meiosis-specific nuclear structural 1 (MNS1), mRNA [NM_018365]	55329	GO:0005882|GO:0051321|GO:0005930|GO:0036126|GO:0070986|GO:0005635|GO:0042802	56721249	chr15	56721190	-	hs|15q21.3	NM_018365	chr15:56721249-56721190	NM_018365	Hs.444483
A_33_P3212994	-9.68471	-3.27571	9.68471	down	ZWINT	ZW10 interacting kinetochore protein	FALSE	Homo sapiens ZW10 interacting kinetochore protein (ZWINT), transcript variant 2, mRNA [NM_032997]	11130	GO:0005515|GO:0007093|GO:0005634|GO:0030425|GO:0005829|GO:0000070|GO:0005737|GO:0047485|GO:0000777|GO:0000776|GO:0051649|GO:0000278|GO:0051301	58117666	chr10	58117607	-	hs|10q21.1	NM_032997	chr10:58117666-58117607	NM_032997	Hs.591363
A_23_P201386	-9.68243	-3.27537	9.68243	down	DDAH1	dimethylarginine dimethylaminohydrolase 1	FALSE	Homo sapiens dimethylarginine dimethylaminohydrolase 1 (DDAH1), transcript variant 1, mRNA [NM_012137]	23576	GO:0005739|GO:0003073|GO:0007263|GO:0000052|GO:0006527|GO:0003824|GO:0016597|GO:0046872|GO:0045766|GO:0016403|GO:0070062|GO:0045429	85784533	chr1	85784474	-	hs|1p22.3	NM_012137	chr1:85784533-85784474	NM_012137	Hs.713411
A_23_P70007	-9.64102	-3.26919	9.64102	down	HMMR	hyaluronan-mediated motility receptor (RHAMM)	FALSE	Homo sapiens hyaluronan-mediated motility receptor (RHAMM) (HMMR), transcript variant 2, mRNA [NM_012484]	3161	GO:0005737|GO:0016020|GO:0009986|GO:0005886|GO:0005540|GO:0005975|GO:0009405|GO:0030212|GO:0044281|GO:0030214|GO:0030203	162918896	chr5	162918837	+	hs|5q34	NM_012484	chr5:162918837-162918896	NM_012484	Hs.740467
A_33_P3339212	-9.63634	-3.26849	9.63634	down	TRIP13	thyroid hormone receptor interactor 13	FALSE	Homo sapiens thyroid hormone receptor interactor 13 (TRIP13), transcript variant 1, mRNA [NM_004237]	9319	GO:0003712|GO:0005515|GO:0048477|GO:0006366|GO:0007286|GO:0005634|GO:0001556|GO:0007283|GO:0005524|GO:0042802|GO:0006302|GO:0007144|GO:0001673|GO:0007130|GO:0007141|GO:0007131	918061	chr5	918002	+	hs|5p15.33	NM_004237	chr5:918002-918061	NM_004237	Hs.436187
A_23_P256956	-9.61704	-3.26559	9.61704	down	KIF20A	kinesin family member 20A	FALSE	Homo sapiens kinesin family member 20A (KIF20A), mRNA [NM_005733]	10112	GO:0008017|GO:0005515|GO:0005215|GO:0005871|GO:0005794|GO:0019901|GO:0000281|GO:0001578|GO:0005874|GO:0005819|GO:0030496|GO:0015031|GO:0003777|GO:0005524|GO:0000920|GO:0000910|GO:0008152|GO:0005654|GO:0016192|GO:0000278|GO:0016887|GO:0007018	137522804	chr5	137522081	+	hs|5q31.2	NM_005733	chr5:137522081-137522804	NM_005733	Hs.718626
A_23_P68610	-9.61044	-3.2646	9.61044	down	TPX2	TPX2, microtubule-associated	FALSE	Homo sapiens TPX2, microtubule-associated (TPX2), mRNA [NM_012112]	22974	GO:0005515|GO:0019901|GO:0060236|GO:0008283|GO:0005874|GO:0005819|GO:0006915|GO:0005634|GO:0005525|GO:0005524|GO:0032147|GO:0000922|GO:0005737|GO:0007067|GO:0015630|GO:0043203|GO:0005654|GO:0051301	30389032	chr20	30388973	+	hs|20q11.21	NM_012112	chr20:30388973-30389032	NM_012112	Hs.244580
A_33_P3299421	-9.60031	-3.26308	9.60031	down	ZNF530	zinc finger protein 530	FALSE	Homo sapiens zinc finger protein 530 (ZNF530), mRNA [NM_020880]	348327	GO:0006355|GO:0005634|GO:0003677|GO:0046872|GO:0006351	58119634	chr19	58119575	+	hs|19q13.43	NM_020880	chr19:58119575-58119634	NM_020880	Hs.97111
A_33_P3283480	-9.58816	-3.26125	9.58816	down	CTSC	cathepsin C	FALSE	Homo sapiens cathepsin C (CTSC), transcript variant 2, mRNA [NM_148170]	1075	GO:0005515|GO:0031404|GO:0005794|GO:0010033|GO:0004252|GO:0019902|GO:0005783|GO:2001235|GO:0007568|GO:0051087|GO:0006915|GO:0043621|GO:0005615|GO:0005764|GO:0042802|GO:0016505|GO:0006955|GO:0016020|GO:0001913|GO:0006508|GO:0008234|GO:0070062	88054087	chr11	88054028	-	hs|11q14.2	NM_148170	chr11:88054087-88054028	NM_148170	Hs.128065
A_32_P186474	-9.5749	-3.25926	9.5749	down	RACGAP1	Rac GTPase activating protein 1	FALSE	Homo sapiens Rac GTPase activating protein 1 (RACGAP1), transcript variant 1, mRNA [NM_013277]	29127	GO:0051256|GO:0005515|GO:0008017|GO:0072686|GO:0007264|GO:0005634|GO:0007283|GO:0009790|GO:0051233|GO:0007108|GO:0032154|GO:0046872|GO:0005829|GO:0007405|GO:0019886|GO:0000915|GO:0070062|GO:0007018|GO:0051056|GO:0043015|GO:0001669|GO:0019901|GO:0051988|GO:0043014|GO:0000281|GO:0032467|GO:0005874|GO:0048487|GO:0005547|GO:0030496|GO:0031234|GO:0043547|GO:0007596|GO:0008272|GO:0005654|GO:0097149|GO:…	50383073	chr12	50383014	-	hs|12q13.12	NM_013277	chr12:50383073-50383014	NM_013277	Hs.505469
A_23_P163567	-9.53361	-3.25302	9.53361	down	SMPD3	sphingomyelin phosphodiesterase 3, neutral membrane (neutral sphingomyelinase II)	FALSE	Homo sapiens sphingomyelin phosphodiesterase 3, neutral membrane (neutral sphingomyelinase II) (SMPD3), mRNA [NM_018667]	55512	GO:0006665|GO:0007049|GO:0006685|GO:0000137|GO:0006687|GO:0005886|GO:0000139|GO:0002244|GO:0004767|GO:0044281|GO:0030072|GO:0046872	68392309	chr16	68392250	-	hs|16q22.1	NM_018667	chr16:68392309-68392250	NM_018667	Hs.368421
A_23_P92441	-9.4951	-3.24718	9.4951	down	MAD2L1	MAD2 mitotic arrest deficient-like 1 (yeast)	FALSE	Homo sapiens MAD2 mitotic arrest deficient-like 1 (yeast) (MAD2L1), mRNA [NM_002358]	4085	GO:0005515|GO:0072686|GO:0007094|GO:0048471|GO:0043066|GO:0007093|GO:0042177|GO:0060564|GO:0005634|GO:0090267|GO:0051436|GO:0031145|GO:0051439|GO:0042803|GO:0042802|GO:0005829|GO:0000070|GO:0000922|GO:0045930|GO:0005643|GO:0000777|GO:0000776|GO:0000278|GO:0051301	120981405	chr4	120981346	-	hs|4q27	NM_002358	chr4:120981405-120981346	NM_002358	Hs.591697
A_33_P3384871	-9.4759	-3.24426	9.4759	down	FBXO5	F-box protein 5	FALSE	Homo sapiens F-box protein 5 (FBXO5), transcript variant 2, mRNA [NM_001142522]	26271	GO:0005515|GO:0019901|GO:0060565|GO:0051437|GO:0005819|GO:0005634|GO:0051436|GO:0001556|GO:0031145|GO:0051439|GO:0046872|GO:0005829|GO:0016050|GO:0007057|GO:0007346|GO:0046785|GO:0000082|GO:0005737|GO:0000083|GO:0005654|GO:0000278|GO:0045835|GO:0007091|GO:0051301	153291957	chr6	153291898	-	hs|6q25.2	NM_001142522	chr6:153291957-153291898	NM_001142522	Hs.520506
A_23_P395374	-9.47135	-3.24357	9.47135	down	HIST1H4D	histone cluster 1, H4d	FALSE	Homo sapiens histone cluster 1, H4d (HIST1H4D), mRNA [NM_003539]	8360	GO:0005515|GO:0010467|GO:0006325|GO:0005634|GO:0045653|GO:0000723|GO:0000183|GO:0000786|GO:0070062|GO:0035574|GO:0035575|GO:0046982|GO:0006334|GO:0006335|GO:0005576|GO:0006336|GO:0000228|GO:0003677|GO:0032776|GO:0034080|GO:0043234|GO:0016020|GO:0045814|GO:0040029|GO:0005654|GO:0000278	26189011	chr6	26188952	-	hs|6p22.2	NM_003539	chr6:26189011-26188952	NM_003539	Hs.248179
A_33_P3403153	-9.40838	-3.23395	9.40838	down	C1QTNF2	C1q and tumor necrosis factor related protein 2	FALSE	Homo sapiens C1q and tumor necrosis factor related protein 2 (C1QTNF2), mRNA [NM_031908]	114898	GO:0070208|GO:0000187|GO:0005581|GO:0045725|GO:0046326|GO:0046321|GO:0005102|GO:0051260|GO:0005615|GO:0042802	159775247	chr5	159775188	-	hs|5q33.3	NM_031908	chr5:159775247-159775188	NM_031908	Hs.110062
A_19_P00326708	-9.38552	-3.23044	9.38552	down			FALSE	ALU6_HUMAN (P39193) Alu subfamily SP sequence contamination warning entry, partial (21%) [THC2538668]			77867679	chr4	77867620	-	hs|4q21.1		chr4:077867679-077867620
A_33_P3242649	-9.37244	-3.22843	9.37244	down	KIF18A	kinesin family member 18A	FALSE	Homo sapiens kinesin family member 18A (KIF18A), mRNA [NM_031217]	81930	GO:0005828|GO:0005515|GO:0008017|GO:0043130|GO:0005634|GO:0015031|GO:0070463|GO:0005829|GO:0019886|GO:0005737|GO:0051010|GO:0008574|GO:0015630|GO:0007019|GO:0007018|GO:0005871|GO:0005815|GO:0003779|GO:0005524|GO:0001726|GO:0007596|GO:0005901|GO:0008152|GO:0007080|GO:0000278	28042475	chr11	28042416	-	hs|11p14.1	NM_031217	chr11:28042475-28042416	NM_031217	Hs.301052
A_23_P88630	-9.3345	-3.22257	9.3345	down	BLM	Bloom syndrome, RecQ helicase-like	FALSE	Homo sapiens Bloom syndrome, RecQ helicase-like (BLM), transcript variant 1, mRNA [NM_000057]	641	GO:0005515|GO:0007095|GO:0010165|GO:0048478|GO:0046632|GO:0005657|GO:0005634|GO:0000079|GO:0051259|GO:0016363|GO:0002039|GO:0005737|GO:0004003|GO:0003697|GO:0000723|GO:0000724|GO:0046641|GO:0051782|GO:0032508|GO:0016887|GO:0000729|GO:0008026|GO:0043140|GO:0000781|GO:0072711|GO:0000405|GO:0070244|GO:0004386|GO:0005730|GO:0051880|GO:0051098|GO:0006310|GO:0000800|GO:0000228|GO:0005524|GO:0071479|GO:…	91358554	chr15	91358495	+	hs|15q26.1	NM_000057	chr15:91358495-91358554	NM_000057	Hs.725208
A_23_P218827	-9.32752	-3.22149	9.32752	down	POLQ	polymerase (DNA directed), theta	FALSE	Homo sapiens polymerase (DNA directed), theta (POLQ), mRNA [NM_199420]	10721	GO:0043142|GO:0003684|GO:0006261|GO:0006281|GO:0071897|GO:0003887|GO:0005654|GO:0005524	121150761	chr3	121150702	-	hs|3q13.33	NM_199420	chr3:121150761-121150702	NM_199420	Hs.241517
A_23_P345707	-9.31753	-3.21995	9.31753	down	TICRR	TOPBP1-interacting checkpoint and replication regulator	FALSE	Homo sapiens TOPBP1-interacting checkpoint and replication regulator (TICRR), mRNA [NM_152259]	90381	GO:0006260|GO:0005515|GO:0030174|GO:0006281|GO:0001731|GO:0010212|GO:0003682|GO:0000075|GO:0005654|GO:0005634|GO:0033314	90170801	chr15	90170742	+	hs|15q26.1	NM_152259	chr15:90170742-90170801	NM_152259	Hs.441708
A_23_P7727	-9.30112	-3.2174	9.30112	down	HAPLN1	hyaluronan and proteoglycan link protein 1	FALSE	Homo sapiens hyaluronan and proteoglycan link protein 1 (HAPLN1), mRNA [NM_001884]	1404	GO:0031012|GO:0001501|GO:0005540|GO:0030198|GO:0005578|GO:0005576|GO:0007417|GO:0007155|GO:0005201	82937382	chr5	82937323	-	hs|5q14.3	NM_001884	chr5:82937382-82937323	NM_001884	Hs.2799
A_33_P3716128	-9.29985	-3.21721	9.29985	down	SMC4	structural maintenance of chromosomes 4	FALSE	Homo sapiens structural maintenance of chromosomes 4 (SMC4), transcript variant 1, mRNA [NM_005496]	10051	GO:0000796|GO:0005515|GO:0007076|GO:0010032|GO:0046982|GO:0005634|GO:0051383|GO:0005524|GO:0005829|GO:0000070|GO:0005737|GO:0045132|GO:0005654|GO:0000278|GO:0051301	160151640	chr3	160151581	+	hs|3q25.33	NM_005496	chr3:160151581-160151640	NM_005496	Hs.58992
A_23_P254733	-9.29735	-3.21682	9.29735	down	CENPU	centromere protein U	FALSE	Homo sapiens centromere protein U (CENPU), transcript variant 1, mRNA [NM_024629]	79682	GO:0034080|GO:0006355|GO:0005815|GO:0006334|GO:0000777|GO:0016032|GO:0005654|GO:0005634|GO:0000278|GO:0043009|GO:0006351|GO:0005829	185616396	chr4	185616337	-	hs|4q35.1	NM_024629	chr4:185616396-185616337	NM_024629	Hs.575032
A_23_P404481	-9.24915	-3.20932	9.24915	down	S1PR1	sphingosine-1-phosphate receptor 1	FALSE	Homo sapiens sphingosine-1-phosphate receptor 1 (S1PR1), mRNA [NM_001400]	1901	GO:0005886|GO:0003376|GO:0030032|GO:0031226|GO:0045124|GO:0019226|GO:0038036|GO:0007193|GO:0030155|GO:0050927|GO:0006935|GO:0051482|GO:0045944|GO:0030182|GO:0003245|GO:0045446|GO:0007155|GO:0030500|GO:0001664|GO:0030335|GO:0046625|GO:0031532|GO:0004930|GO:0061384|GO:0001525|GO:0048661|GO:0072678|GO:0051497|GO:0007186|GO:0016477|GO:0032320|GO:0007420|GO:0045121|GO:0016021|GO:0001955|GO:0009897|GO:…	101706380	chr1	101706321	+	hs|1p21.2	NM_001400	chr1:101706321-101706380	NM_001400	Hs.154210
A_23_P88731	-9.24748	-3.20906	9.24748	down	RAD51	RAD51 recombinase	FALSE	Homo sapiens RAD51 recombinase (RAD51), transcript variant 1, mRNA [NM_002875]	5888	GO:0005515|GO:0000793|GO:0048471|GO:0005634|GO:0010569|GO:0042802|GO:0006302|GO:0005739|GO:0005737|GO:0003690|GO:0003697|GO:0000724|GO:0005759|GO:0051260|GO:0007131|GO:0043142|GO:0000794|GO:0005815|GO:0070182|GO:0005730|GO:0006310|GO:0000800|GO:0000228|GO:0008022|GO:0006312|GO:0005524|GO:0071479|GO:0006974|GO:0003684|GO:0006281|GO:0007126|GO:0016605|GO:0000730|GO:0006268|GO:0005654|GO:0051106	41023666	chr15	41023607	+	hs|15q15.1	NM_002875	chr15:41023607-41023666	NM_002875	Hs.631709
A_24_P287941	-9.21099	-3.20336	9.21099	down	PSMC3IP	PSMC3 interacting protein	FALSE	Homo sapiens PSMC3 interacting protein (PSMC3IP), transcript variant 1, mRNA [NM_013290]	29893	GO:0051321|GO:0030374|GO:0006310|GO:0005634|GO:0005575|GO:0003677	40724775	chr17	40724716	-	hs|17q21.2	NM_013290	chr17:40724775-40724716	NM_013290	Hs.383019
A_32_P204722	-9.09152	-3.18452	9.09152	down			FALSE	HSU09087 thymopoietin beta {Homo sapiens} (exp=-1; wgp=0; cg=0), partial (28%) [THC2520108]			74702649	chr16	74702590	+	hs|16q23.1		chr16:074702590-074702649
A_23_P30254	-9.0726	-3.18152	9.0726	down	PLK2	polo-like kinase 2	FALSE	Homo sapiens polo-like kinase 2 (PLK2), transcript variant 1, mRNA [NM_006622]	10769	GO:0005515|GO:0007093|GO:0032436|GO:0007265|GO:0060291|GO:0060292|GO:0046599|GO:0032403|GO:0030425|GO:0032092|GO:0005622|GO:0000082|GO:0048167|GO:0007613|GO:0004871|GO:0061000|GO:0007052|GO:0043123|GO:0005813|GO:0043066|GO:0032486|GO:0005814|GO:0005524|GO:0004674|GO:0006468	57750052	chr5	57749993	-	hs|5q11.2	NM_006622	chr5:57750052-57749993	NM_006622	Hs.398157
A_23_P212800	-9.07192	-3.18141	9.07192	down	FGF5	fibroblast growth factor 5	FALSE	Homo sapiens fibroblast growth factor 5 (FGF5), transcript variant 1, mRNA [NM_004464]	2250	GO:0008286|GO:0048011|GO:0008284|GO:0008283|GO:0023019|GO:0048015|GO:0007267|GO:0005104|GO:0005576|GO:0005615|GO:0007399|GO:0007173|GO:0008543|GO:0045087|GO:0010001|GO:0051781|GO:0008083|GO:0038095	81207865	chr4	81207806	+	hs|4q21.21	NM_004464	chr4:81207806-81207865	NM_004464	Hs.37055
A_23_P50990	-9.07136	-3.18132	9.07136	down	CENPO	centromere protein O	FALSE	Homo sapiens centromere protein O (CENPO), transcript variant 1, mRNA [NM_024322]	79172	GO:0034080|GO:0006334|GO:0000777|GO:0005654|GO:0000278|GO:0005829	25040631	chr2	25040572	+	hs|2p23.3	NM_024322	chr2:25040572-25040631	NM_024322	Hs.731569
A_23_P89509	-8.97362	-3.16569	8.97362	down	SPAG5	sperm associated antigen 5	FALSE	Homo sapiens sperm associated antigen 5 (SPAG5), mRNA [NM_006461]	10615	GO:0005515|GO:0072686|GO:0005815|GO:0051988|GO:0030496|GO:0005634|GO:0035371|GO:0000070|GO:0000922|GO:0005737|GO:0007059|GO:0000777|GO:0000776|GO:0005654|GO:0007051|GO:0051301	26905097	chr17	26905038	-	hs|17q11.2	NM_006461	chr17:26905097-26905038	NM_006461	Hs.514033
A_23_P63789	-8.97159	-3.16536	8.97159	down	ZWINT	ZW10 interacting kinetochore protein	FALSE	Homo sapiens ZW10 interacting kinetochore protein (ZWINT), transcript variant 2, mRNA [NM_032997]	11130	GO:0005515|GO:0007093|GO:0005634|GO:0030425|GO:0005829|GO:0000070|GO:0005737|GO:0047485|GO:0000777|GO:0000776|GO:0051649|GO:0000278|GO:0051301	58117404	chr10	58117345	-	hs|10q21.1	NM_032997	chr10:58117404-58117345	NM_032997	Hs.591363
A_23_P206441	-8.95482	-3.16267	8.95482	down	FANCA	Fanconi anemia, complementation group A	FALSE	Homo sapiens Fanconi anemia, complementation group A (FANCA), transcript variant 1, mRNA [NM_000135]	2175	GO:0005515|GO:0008585|GO:0005737|GO:0006461|GO:0006281|GO:0042127|GO:0005730|GO:0005654|GO:0005634|GO:0008584|GO:0043240|GO:0007140	89804072	chr16	89804013	-	hs|16q24.3	NM_000135	chr16:89804072-89804013	NM_000135	Hs.744083
A_23_P65757	-8.89884	-3.15362	8.89884	down	CCNB2	cyclin B2	FALSE	Homo sapiens cyclin B2 (CCNB2), mRNA [NM_004701]	9133	GO:0005515|GO:0007077|GO:0005813|GO:0019901|GO:0048538|GO:0000079|GO:0001701|GO:0005829|GO:0007067|GO:0016020|GO:0000086|GO:0015630|GO:0051726|GO:0005654|GO:0043029|GO:0000278|GO:0040007|GO:0051301	59417198	chr15	59417139	+	hs|15q22.2	NM_004701	chr15:59417139-59417198	NM_004701	Hs.194698
A_32_P206698	-8.83831	-3.14377	8.83831	down	CKS1B	CDC28 protein kinase regulatory subunit 1B	FALSE	Homo sapiens CDC28 protein kinase regulatory subunit 1B (CKS1B), transcript variant 1, mRNA [NM_001826]	1163	GO:0005515|GO:0000082|GO:0008283|GO:0016538|GO:0005654|GO:0000079|GO:0000278|GO:0051301	154950471	chr1	154947230	+	hs|1q21.3	NM_001826	chr1:154947230-154950471	NM_001826	Hs.374378
A_33_P3351851	-8.81778	-3.14042	8.81778	down	HIST1H4L	histone cluster 1, H4l	FALSE	Homo sapiens histone cluster 1, H4l (HIST1H4L), mRNA [NM_003546]	8368	GO:0005515|GO:0010467|GO:0006325|GO:0005634|GO:0045653|GO:0000723|GO:0000183|GO:0000786|GO:0070062|GO:0035574|GO:0035575|GO:0046982|GO:0006334|GO:0006335|GO:0005576|GO:0006336|GO:0000228|GO:0003677|GO:0032776|GO:0034080|GO:0043234|GO:0016020|GO:0045814|GO:0040029|GO:0005654|GO:0000278	27841113	chr6	27841054	-	hs|6p22.1	NM_003546	chr6:27841113-27841054	NM_003546	Hs.533295
A_23_P118815	-8.81755	-3.14038	8.81755	down	BIRC5	baculoviral IAP repeat containing 5	FALSE	Homo sapiens baculoviral IAP repeat containing 5 (BIRC5), transcript variant 3, mRNA [NM_001012271]	332	GO:0008017|GO:0005515|GO:0004842|GO:0042803|GO:0042802|GO:0000910|GO:0043027|GO:0048037|GO:0046982|GO:0005814|GO:0005819|GO:0031536|GO:0030496|GO:0051303|GO:0045931|GO:0000777|GO:0008270|GO:0000278|GO:0019899|GO:0045892|GO:0000775|GO:0051301|GO:0005881|GO:0008284|GO:0031577|GO:0004869|GO:0016567|GO:0031503|GO:0051087|GO:0005634|GO:0046872|GO:0005829|GO:0005737|GO:0007059|GO:0015631|GO:0000086|GO:…	76220779	chr17	76220720	+	hs|17q25.3	NM_001012271	chr17:76220720-76220779	NM_001012271	Hs.744872
A_23_P31073	-8.7946	-3.13662	8.7946	down	MYB	v-myb avian myeloblastosis viral oncogene homolog	FALSE	Homo sapiens v-myb avian myeloblastosis viral oncogene homolog (MYB), transcript variant 2, mRNA [NM_005375]	4602	GO:0005515|GO:0048538|GO:0016363|GO:0005829|GO:0048872|GO:0000082|GO:0071987|GO:0045944|GO:0030183|GO:0071354|GO:0006816|GO:0006338|GO:0006355|GO:0000122|GO:0048566|GO:0000978|GO:0001701|GO:0006351|GO:0051574|GO:0001077|GO:0051571|GO:0007596|GO:0003682|GO:0045624|GO:0045893|GO:0045892	135540282	chr6	135540223	+	hs|6q23.3	NM_005375	chr6:135540223-135540282	NM_005375	Hs.606320
A_23_P333228	-8.71462	-3.12344	8.71462	down	2017-03-04	membrane-associated ring finger (C3HC4) 4, E3 ubiquitin protein ligase	FALSE	Homo sapiens membrane-associated ring finger (C3HC4) 4, E3 ubiquitin protein ligase (MARCH4), mRNA [NM_020814]	57574	GO:0005802|GO:0004842|GO:0016567|GO:0005795|GO:0000139|GO:0016874|GO:0008270|GO:0016021	217122655	chr2	217122596	-	hs|2q35	NM_020814	chr2:217122655-217122596	NM_020814	Hs.170388
A_33_P3379061	-8.71062	-3.12278	8.71062	down	C9orf47	chromosome 9 open reading frame 47	FALSE	Homo sapiens chromosome 9 open reading frame 47 (C9orf47), transcript variant 1, mRNA [NM_001001938]	286223	GO:0005576	91608557	chr9	91608498	+	hs|9q22.1	NM_001001938	chr9:91608498-91608557	NM_001001938	Hs.585118
A_23_P48835	-8.68545	-3.1186	8.68545	down	KIF23	kinesin family member 23	FALSE	Homo sapiens kinesin family member 23 (KIF23), transcript variant 1, mRNA [NM_138555]	9493	GO:0005515|GO:0008017|GO:0051256|GO:0072686|GO:0005634|GO:0005829|GO:0000910|GO:0019886|GO:0016887|GO:0007018|GO:0005871|GO:0005813|GO:0000281|GO:0032467|GO:0000022|GO:0005874|GO:0005819|GO:0030496|GO:0003777|GO:0005524|GO:0045171|GO:0007596|GO:0008152|GO:0005654|GO:0097149|GO:0000278|GO:0005925	69740583	chr15	69740524	+	hs|15q23	NM_138555	chr15:69740524-69740583	NM_138555	Hs.270845
A_24_P227091	-8.68375	-3.11832	8.68375	down	KIF11	kinesin family member 11	FALSE	Homo sapiens kinesin family member 11 (KIF11), mRNA [NM_004523]	3832	GO:0008017|GO:0007100|GO:0032403|GO:0005829|GO:0019886|GO:0005737|GO:0007059|GO:0008574|GO:0005876|GO:0090307|GO:0007051|GO:0007052|GO:0016887|GO:0007018|GO:0005871|GO:0019901|GO:0005874|GO:0005819|GO:0046602|GO:0003777|GO:0005524|GO:0000922|GO:0007067|GO:0016020|GO:0007596|GO:0008152|GO:0051301	94414686	chr10	94414627	+	hs|10q23.33	NM_004523	chr10:94414627-94414686	NM_004523	Hs.8878
A_23_P48669	-8.68115	-3.11789	8.68115	down	CDKN3	cyclin-dependent kinase inhibitor 3	FALSE	Homo sapiens cyclin-dependent kinase inhibitor 3 (CDKN3), transcript variant 1, mRNA [NM_005192]	1033	GO:0005515|GO:0048471|GO:0005737|GO:0000082|GO:0008285|GO:0007050|GO:0008138|GO:0004722|GO:0000079|GO:0035335|GO:0004725	54882635	chr14	54878384	+	hs|14q22.2	NM_005192	chr14:54878384-54882635	NM_005192	Hs.84113
A_23_P430201	-8.65494	-3.11352	8.65494	down	CEP128	centrosomal protein 128kDa	FALSE	Homo sapiens centrosomal protein 128kDa (CEP128), mRNA [NM_152446]	145508	GO:0005737|GO:0000922|GO:0005815|GO:0005814	80963137	chr14	80963078	-	hs|14q31.1	NM_152446	chr14:80963137-80963078	NM_152446	Hs.162889
A_24_P214231	-8.64656	-3.11213	8.64656	down	STIL	SCL/TAL1 interrupting locus	FALSE	Homo sapiens SCL/TAL1 interrupting locus (STIL), transcript variant 1, mRNA [NM_001048166]	6491	GO:0005515|GO:0043066|GO:0005813|GO:0007368|GO:0033504|GO:0005814|GO:0008283|GO:0045737|GO:0001843|GO:0001701|GO:0005829|GO:0007224|GO:0001947|GO:0051298|GO:0005737|GO:0000578|GO:0035264|GO:0060271|GO:0071539|GO:0021915|GO:0071174|GO:0030900|GO:0030903|GO:0007052	47716850	chr1	47716791	-	hs|1p33	NM_001048166	chr1:47716850-47716791	NM_001048166	Hs.525198
A_33_P3403075	-8.5019	-3.08778	8.5019	down	PRR11	proline rich 11	FALSE	Homo sapiens proline rich 11 (PRR11), mRNA [NM_018304]	55771	GO:0005737|GO:0016020|GO:0051726|GO:0005634	57279020	chr17	57278961	+	hs|17q22	NM_018304	chr17:57278961-57279020	NM_018304	Hs.631750
A_32_P221799	-8.45693	-3.08013	8.45693	down	HIST1H2AM	histone cluster 1, H2am	FALSE	Homo sapiens histone cluster 1, H2am (HIST1H2AM), mRNA [NM_003514]	8336	GO:0005515|GO:0008150|GO:0046982|GO:0005634|GO:0019899|GO:0000786|GO:0003677|GO:0070062	27860566	chr6	27860507	-	hs|6p22.1	NM_003514	chr6:27860566-27860507	NM_003514	Hs.134999
A_33_P3260146	-8.40699	-3.07159	8.40699	down	C9orf3	chromosome 9 open reading frame 3	FALSE	Homo sapiens chromosome 9 open reading frame 3 (C9orf3), transcript variant 1, mRNA [NM_001193329]	84909	GO:0019370|GO:0005737|GO:0004177|GO:0006508|GO:0005730|GO:0008270|GO:0008237	97686441	chr9	97686382	+	hs|9q22.32	NM_001193329	chr9:97686382-97686441	NM_001193329	Hs.434253
A_33_P3433873	-8.40606	-3.07143	8.40606	down	ZWILCH	zwilch kinetochore protein	FALSE	Homo sapiens zwilch kinetochore protein (ZWILCH), transcript variant 2, mRNA [NM_001287821]	55055	GO:0005515|GO:0007093|GO:0007067|GO:0000777|GO:0000776|GO:0000278|GO:0051301|GO:0005829	66841211	chr15	66841152	+	hs|15q22.31	NM_001287821	chr15:66841152-66841211	NM_001287821	Hs.21331
A_23_P25626	-8.39745	-3.06995	8.39745	down	BORA	bora, aurora kinase A activator	FALSE	Homo sapiens bora, aurora kinase A activator (BORA), transcript variant 1, mRNA [NM_024808]	79866	GO:0032880|GO:0005515|GO:0007088|GO:0007067|GO:0019901|GO:0060236|GO:0000086|GO:0000278|GO:0051301|GO:0005829	73329415	chr13	73329356	+	hs|13q22.1	NM_024808	chr13:73329356-73329415	NM_024808	Hs.643464
A_33_P3321293	-8.38362	-3.06757	8.38362	down	IQGAP3	IQ motif containing GTPase activating protein 3	FALSE	Homo sapiens IQ motif containing GTPase activating protein 3 (IQGAP3), mRNA [NM_178229]	128239	GO:0005516|GO:0008361|GO:0071310|GO:0007265|GO:0016328|GO:0005099|GO:0010628|GO:0000187|GO:0000082|GO:0005737|GO:0070856|GO:0032320|GO:0005911|GO:0010629|GO:0017048|GO:0070371|GO:0033601	156495257	chr1	156495198	-	hs|1q22	NM_178229	chr1:156495257-156495198	NM_178229	Hs.591495
A_33_P3400477	-8.32503	-3.05746	8.32503	down	STIL	SCL/TAL1 interrupting locus	FALSE	Homo sapiens SCL/TAL1 interrupting locus (STIL), transcript variant 3, mRNA [NM_001282936]	6491	GO:0005515|GO:0043066|GO:0005813|GO:0007368|GO:0033504|GO:0005814|GO:0008283|GO:0045737|GO:0001843|GO:0001701|GO:0005829|GO:0007224|GO:0001947|GO:0051298|GO:0005737|GO:0000578|GO:0035264|GO:0060271|GO:0071539|GO:0021915|GO:0071174|GO:0030900|GO:0030903|GO:0007052	47726185	chr1	47726126	-	hs|1p33	NM_001282936	chr1:47726185-47726126	NM_001282936	Hs.525198
A_23_P252740	-8.31265	-3.05531	8.31265	down	DSCC1	DNA replication and sister chromatid cohesion 1	FALSE	Homo sapiens DNA replication and sister chromatid cohesion 1 (DSCC1), mRNA [NM_024094]	79075	GO:0006260|GO:0005515|GO:0031390|GO:0034421|GO:0034088|GO:0003689|GO:0005654|GO:0000785|GO:0006275|GO:0000775	120847137	chr8	120847079	-	hs|8q24.12	NM_024094	chr8:120847137-120847079	NM_024094	Hs.315167
A_23_P100344	-8.26498	-3.04701	8.26498	down	ORC6	origin recognition complex, subunit 6	FALSE	Homo sapiens origin recognition complex, subunit 6 (ORC6), transcript variant 1, mRNA [NM_014321]	23594	GO:0006260|GO:0005515|GO:0006261|GO:0000082|GO:0000808|GO:0016020|GO:0005886|GO:0005654|GO:0005634|GO:0005664|GO:0000278|GO:0003677	46731578	chr16	46731519	+	hs|16q11.2	NM_014321	chr16:46731519-46731578	NM_014321	Hs.49760
A_33_P3298387	-8.25496	-3.04526	8.25496	down	PLK1	polo-like kinase 1	FALSE	polo-like kinase 1 [Source:HGNC Symbol;Acc:HGNC:9077] [ENST00000570220]	5347	GO:0005515|GO:0007077|GO:0008017|GO:0010997|GO:0000910|GO:0018105|GO:0016301|GO:0051443|GO:0046677|GO:0010800|GO:0005813|GO:0006996|GO:0019901|GO:0000281|GO:0005819|GO:0043393|GO:0030496|GO:0000122|GO:0000070|GO:0000922|GO:0000776|GO:0005654|GO:0030071|GO:0000278|GO:0007094|GO:0007092|GO:0016567|GO:0008283|GO:0045736|GO:0001578|GO:0031572|GO:0032436|GO:0005634|GO:0051233|GO:0031145|GO:0005829|GO:…	23692310	chr16	23692251	+	hs|16p12.2	AB084459	chr16:23692251-23692310		Hs.592049
A_23_P80032	-8.24457	-3.04344	8.24457	down	E2F1	E2F transcription factor 1	FALSE	Homo sapiens E2F transcription factor 1 (E2F1), mRNA [NM_005225]	1869	GO:0005515|GO:0003700|GO:0005634|GO:0048146|GO:0007283|GO:2000045|GO:0071398|GO:0005737|GO:0000082|GO:1900740|GO:0007219|GO:0045944|GO:0035189|GO:0048255|GO:0006355|GO:0008630|GO:0043276|GO:0071456|GO:0006915|GO:0001047|GO:0000122|GO:0003677|GO:0097193|GO:0071930|GO:0006351|GO:0010628|GO:0043565|GO:0072332|GO:0005654|GO:0000077|GO:0030900|GO:0000278|GO:0045893|GO:0045892|GO:0008134	32264048	chr20	32263989	-	hs|20q11.22	NM_005225	chr20:32264048-32263989	NM_005225	Hs.654393
A_33_P3229122	-8.23461	-3.0417	8.23461	down	HIST1H2BF	histone cluster 1, H2bf	FALSE	Homo sapiens histone cluster 1, H2bf (HIST1H2BF), mRNA [NM_003522]	8343	GO:0046982|GO:0050830|GO:0019731|GO:0006334|GO:0006325|GO:0005654|GO:0005634|GO:0000786|GO:0005615|GO:0003677|GO:0070062|GO:0002227	26200212	chr6	26200153	+	hs|6p22.2	NM_003522	chr6:26200153-26200212	NM_003522	Hs.182137
A_33_P3248519	-8.2267	-3.04031	8.2267	down	SMC4	structural maintenance of chromosomes 4	FALSE	Homo sapiens structural maintenance of chromosomes 4 (SMC4), transcript variant 1, mRNA [NM_005496]	10051	GO:0000796|GO:0005515|GO:0007076|GO:0010032|GO:0046982|GO:0005634|GO:0051383|GO:0005524|GO:0005829|GO:0000070|GO:0005737|GO:0045132|GO:0005654|GO:0000278|GO:0051301	160132265	chr3	160132206	+	hs|3q25.33	NM_005496	chr3:160132206-160132265	NM_005496	Hs.58992
A_23_P98898	-8.22624	-3.04023	8.22624	down	CDK2	cyclin-dependent kinase 2	FALSE	Homo sapiens cyclin-dependent kinase 2 (CDK2), transcript variant 1, mRNA [NM_001798]	1017	GO:0005515|GO:0032298|GO:0000793|GO:0008284|GO:0015030|GO:0071732|GO:0005634|GO:0007265|GO:0031145|GO:0046872|GO:0005829|GO:0000082|GO:0005737|GO:0000086|GO:0006813|GO:0006977|GO:0000806|GO:0005667|GO:0000781|GO:0005813|GO:0030332|GO:0000805|GO:0016572|GO:0005524|GO:0051439|GO:0006260|GO:0051298|GO:0035173|GO:0007067|GO:0006281|GO:0007126|GO:0060968|GO:0007596|GO:0000307|GO:0005654|GO:0031571|GO:…	56365848	chr12	56365789	+	hs|12q13.2	NM_001798	chr12:56365789-56365848	NM_001798	Hs.19192
A_23_P253536	-8.21378	-3.03805	8.21378	down	NPR3	natriuretic peptide receptor 3	FALSE	Homo sapiens natriuretic peptide receptor 3 (NPR3), transcript variant 2, mRNA [NM_000908]	4883	GO:0033688|GO:0048015|GO:0042562|GO:0007200|GO:0008528|GO:0048662|GO:0030157|GO:0007194|GO:0007193|GO:0042803|GO:0001501|GO:0016941|GO:0051000|GO:0005887|GO:0008217|GO:0002158|GO:0017046|GO:0035810|GO:0070062	32786370	chr5	32784961	+	hs|5p13.3	NM_000908	chr5:32784961-32786370	NM_000908	Hs.13528
A_24_P276102	-8.21096	-3.03755	8.21096	down	RBL1	retinoblastoma-like 1	FALSE	Homo sapiens retinoblastoma-like 1 (RBL1), transcript variant 2, mRNA [NM_183404]	5933	GO:0005515|GO:0005667|GO:0010467|GO:0006367|GO:0043550|GO:0005634|GO:0000122|GO:0006351|GO:0045944|GO:0051726|GO:0016032|GO:0005654|GO:0007179|GO:0000278|GO:0008134|GO:0016568	35635888	chr20	35635829	-	hs|20q11.23	NM_183404	chr20:35635888-35635829	NM_183404	Hs.207745
A_23_P307544	-8.13824	-3.02472	8.13824	down	PLXNA2	plexin A2	FALSE	Homo sapiens plexin A2 (PLXNA2), mRNA [NM_025179]	5362	GO:0005515|GO:0030334|GO:0021935|GO:0005886|GO:0001756|GO:0060037|GO:0002116|GO:0005622|GO:0051642|GO:0017154|GO:0005887|GO:0007411|GO:0071526|GO:0021915|GO:0060174	208196333	chr1	208196274	-	hs|1q32.2	NM_025179	chr1:208196333-208196274	NM_025179	Hs.497626
A_24_P251969	-8.04384	-3.00788	8.04384	down	FGF1	fibroblast growth factor 1 (acidic)	FALSE	Homo sapiens fibroblast growth factor 1 (acidic) (FGF1), transcript variant 1, mRNA [NM_000800]	2246	GO:0005515|GO:0008286|GO:0008284|GO:0030324|GO:0001759|GO:0005615|GO:0009653|GO:0005829|GO:0034605|GO:0007173|GO:0043406|GO:0045944|GO:0051781|GO:0070374|GO:0005938|GO:0008201|GO:0050679|GO:0048011|GO:0030335|GO:0060681|GO:0048015|GO:0005730|GO:0005578|GO:2000544|GO:0005576|GO:0005104|GO:0007275|GO:0001525|GO:0045766|GO:0044548|GO:0007165|GO:0008543|GO:0045087|GO:0030544|GO:0005654|GO:0072163|GO:…	141973506	chr5	141973447	-	hs|5q31.3	NM_000800	chr5:141973506-141973447	NM_000800	Hs.483635
A_23_P45799	-8.04368	-3.00786	8.04368	down	ORC1	origin recognition complex, subunit 1	FALSE	Homo sapiens origin recognition complex, subunit 1 (ORC1), transcript variant 1, mRNA [NM_004153]	4998	GO:0005515|GO:0000808|GO:0005886|GO:0005730|GO:0005634|GO:0003677|GO:0005524|GO:0005829|GO:0006260|GO:0000082|GO:0005737|GO:0000083|GO:0006270|GO:0003682|GO:0005654|GO:0005664|GO:0000278	52840560	chr1	52840501	-	hs|1p32.3	NM_004153	chr1:52840560-52840501	NM_004153	Hs.17908
A_32_P152696	-8.0372	-3.00669	8.0372	down			FALSE				22155768	chr9	22155709	+	hs|9p21.3		chr9:022155709-022155768
A_33_P3227225	-8.02837	-3.00511	8.02837	down			FALSE				132056513	chr2	132056454	-	hs|2q21.1		chr2:132056513-132056454
A_23_P385861	-8.02589	-3.00466	8.02589	down	CDCA2	cell division cycle associated 2	FALSE	Homo sapiens cell division cycle associated 2 (CDCA2), mRNA [NM_152562]	157313	GO:0007067|GO:0005737|GO:0007059|GO:0005694|GO:0035307|GO:0005654|GO:0051301	25365315	chr8	25365256	+	hs|8p21.2	NM_152562	chr8:25365256-25365315	NM_152562	Hs.33366
A_23_P28466	-8.01195	-3.00215	8.01195	down	DAW1	dynein assembly factor with WDR repeat domains 1	FALSE	Homo sapiens dynein assembly factor with WDR repeat domains 1 (DAW1), mRNA [NM_178821]	164781	GO:0005929	228788687	chr2	228786256	+	hs|2q36.3	NM_178821	chr2:228786256-228788687	NM_178821	Hs.424594
A_23_P101054	-7.98903	-2.99802	7.98903	down	KRT34	keratin 34, type I	FALSE	Homo sapiens keratin 34, type I (KRT34), mRNA [NM_021013]	3885	GO:0005882|GO:0008544|GO:0005198|GO:0005615|GO:0070062	39534077	chr17	39534018	-	hs|17q21.2	NM_021013	chr17:39534077-39534018	NM_021013	Hs.296942
A_23_P57379	-7.97428	-2.99535	7.97428	down	CDC45	cell division cycle 45	FALSE	Homo sapiens cell division cycle 45 (CDC45), transcript variant 2, mRNA [NM_003504]	8318	GO:0005515|GO:0005813|GO:1900087|GO:0005656|GO:0005634|GO:0003688|GO:0006260|GO:0006271|GO:0000082|GO:0005737|GO:0000083|GO:0003697|GO:0006270|GO:0003682|GO:0000076|GO:0000727|GO:0043138|GO:0005654|GO:0032508|GO:0031298|GO:0000278|GO:0031938|GO:0031261|GO:0006267	19508015	chr22	19506385	+	hs|22q11.21	NM_003504	chr22:19506385-19508015	NM_003504	Hs.474217
A_33_P3867534	-7.96996	-2.99457	7.96996	down	MCM10	minichromosome maintenance complex component 10	FALSE	Homo sapiens minichromosome maintenance complex component 10 (MCM10), transcript variant 1, mRNA [NM_182751]	55388	GO:0006260|GO:0005515|GO:0005737|GO:0000082|GO:0008283|GO:0005730|GO:0005654|GO:0005634|GO:0000278|GO:0003677|GO:0046872|GO:0042802	13252051	chr10	13251992	+	hs|10p13	NM_182751	chr10:13251992-13252051	NM_182751	Hs.198363
A_23_P212284	-7.96835	-2.99428	7.96835	down	POC1A	POC1 centriolar protein A	FALSE	Homo sapiens POC1 centriolar protein A (POC1A), transcript variant 1, mRNA [NM_015426]	25886	GO:0005515|GO:0005813|GO:0000922|GO:0005814|GO:0030030|GO:0036064	52109513	chr3	52109454	-	hs|3p21.2	NM_015426	chr3:52109513-52109454	NM_015426	Hs.476306
A_33_P3240295	-7.95623	-2.99208	7.95623	down			FALSE	keratin 18 pseudogene 26 [Source:HGNC Symbol;Acc:HGNC:33395] [ENST00000454475]			74534419	chr2	74534360	-	hs|2p13.1		chr2:74534419-74534360
A_23_P54622	-7.93171	-2.98763	7.93171	down	KIF22	kinesin family member 22	FALSE	Homo sapiens kinesin family member 22 (KIF22), transcript variant 1, mRNA [NM_007317]	3835	GO:0008017|GO:0005871|GO:0005874|GO:0005819|GO:0005634|GO:0003777|GO:0003677|GO:0005524|GO:0005829|GO:0019886|GO:0007067|GO:0005737|GO:0006281|GO:0007596|GO:0007062|GO:0000776|GO:0005654|GO:0007080|GO:0016887|GO:0000785|GO:0005925|GO:0007018	29816143	chr16	29815336	+	hs|16p11.2	NM_007317	chr16:29815336-29816143	NM_007317	Hs.612151
A_33_P3224105	-7.91583	-2.98474	7.91583	down	KNSTRN	kinetochore-localized astrin/SPAG5 binding protein	FALSE	Homo sapiens kinetochore-localized astrin/SPAG5 binding protein (KNSTRN), transcript variant 2, mRNA [NM_001142761]	90417	GO:0005515|GO:0072686|GO:0051988|GO:0005634|GO:0035371|GO:0000070|GO:0000922|GO:0005737|GO:0007059|GO:0015630|GO:0000777|GO:0000776|GO:0007051|GO:0051301	40686306	chr15	40686247	+	hs|15q15.1	NM_001142761	chr15:40686247-40686306	NM_001142761	Hs.525796
A_23_P122197	-7.89726	-2.98135	7.89726	down	CCNB1	cyclin B1	FALSE	Homo sapiens cyclin B1 (CCNB1), mRNA [NM_031966]	891	GO:0007077|GO:0005515|GO:0060045|GO:0046680|GO:0090266|GO:0007283|GO:0001556|GO:0005113|GO:0071398|GO:0005813|GO:0071283|GO:0019901|GO:0001701|GO:0000922|GO:0035173|GO:0045931|GO:0055015|GO:0005654|GO:0007080|GO:0000278|GO:0031442|GO:0051301|GO:0043148|GO:0005634|GO:0000079|GO:0048146|GO:0042246|GO:0031145|GO:0005829|GO:0005737|GO:0000082|GO:0000086|GO:0051726|GO:2000775|GO:0060623|GO:0051987|GO:…	68473123	chr5	68471363	+	hs|5q13.2	NM_031966	chr5:68471363-68473123	NM_031966	Hs.23960
A_33_P3659876	-7.89361	-2.98069	7.89361	down	NCAPG2	non-SMC condensin II complex, subunit G2	FALSE	Homo sapiens non-SMC condensin II complex, subunit G2 (NCAPG2), transcript variant 2, mRNA [NM_001281932]	54892	GO:0005515|GO:0007067|GO:0016020|GO:0030261|GO:0001833|GO:0005654|GO:0005634|GO:0035064|GO:0000278|GO:0051301	158437043	chr7	158436984	-	hs|7q36.3	NM_001281932	chr7:158437043-158436984	NM_001281932	Hs.18616
A_23_P345678	-7.80134	-2.96372	7.80134	down	FANCD2	Fanconi anemia, complementation group D2	FALSE	Homo sapiens Fanconi anemia, complementation group D2 (FANCD2), transcript variant 1, mRNA [NM_033084]	2177	GO:0007129|GO:0005515|GO:0000793|GO:0006281|GO:0005794|GO:0070182|GO:0007276|GO:0005654|GO:0010332|GO:0043231	10140986	chr3	10140927	+	hs|3p25.3	NM_033084	chr3:10140927-10140986	NM_033084	Hs.208388
A_23_P145024	-7.75539	-2.9552	7.75539	down	ADRB2	adrenoceptor beta 2, surface	FALSE	Homo sapiens adrenoceptor beta 2, surface (ADRB2), mRNA [NM_000024]	154	GO:0005515|GO:0005886|GO:0045453|GO:0004941|GO:0009409|GO:0002024|GO:0002025|GO:0015459|GO:0005634|GO:0005764|GO:0042803|GO:0051380|GO:0042312|GO:0007190|GO:0031649|GO:0007171|GO:0016324|GO:0045986|GO:0040015|GO:0045944|GO:0031398|GO:0030501|GO:0008179|GO:0008333|GO:0006898|GO:0002032|GO:0043235|GO:0050873|GO:0005887|GO:0002028|GO:0071875|GO:0007188|GO:0007189|GO:0043410|GO:0007166|GO:0005768	148208139	chr5	148208080	+	hs|5q32	NM_000024	chr5:148208080-148208139	NM_000024	Hs.2551
A_33_P3397443	-7.7534	-2.95483	7.7534	down	PKMYT1	protein kinase, membrane associated tyrosine/threonine 1	FALSE	Homo sapiens protein kinase, membrane associated tyrosine/threonine 1 (PKMYT1), transcript variant 2, mRNA [NM_182687]	9088	GO:0005515|GO:0007088|GO:0005794|GO:0005783|GO:0000079|GO:0005524|GO:0046872|GO:0005829|GO:0007067|GO:0000082|GO:0004672|GO:0016020|GO:0000139|GO:0016301|GO:0004674|GO:0010923|GO:0000086|GO:0051726|GO:0005789|GO:0006468|GO:0005654|GO:0000278	3022879	chr16	3022820	-	hs|16p13.3	NM_182687	chr16:3022879-3022820	NM_182687	Hs.732385
A_33_P3326989	-7.74728	-2.95369	7.74728	down	MOK	MOK protein kinase	FALSE	Homo sapiens MOK protein kinase (MOK), transcript variant 1, mRNA [NM_014226]	5891	GO:0007165|GO:0005737|GO:0004672|GO:0004674|GO:0051726|GO:0006468|GO:0005524|GO:0004693	102699017	chr14	102698958	-	hs|14q32.31	NM_014226	chr14:102699017-102698958	NM_014226	Hs.104119
A_23_P93823	-7.73865	-2.95208	7.73865	down	RFC2	replication factor C (activator 1) 2, 40kDa	FALSE	Homo sapiens replication factor C (activator 1) 2, 40kDa (RFC2), transcript variant 1, mRNA [NM_181471]	5982	GO:0005515|GO:0005794|GO:0003689|GO:0005634|GO:0005524|GO:0006260|GO:0006261|GO:0006271|GO:0006281|GO:0000723|GO:0006283|GO:0000722|GO:0006297|GO:0005654|GO:0005663|GO:0006289|GO:0000278|GO:0032201	73649925	chr7	73649866	-	hs|7q11.23	NM_181471	chr7:73649925-73649866	NM_181471	Hs.647062
A_23_P214821	-7.68007	-2.94112	7.68007	down	EDN1	endothelin 1	FALSE	Homo sapiens endothelin 1 (EDN1), transcript variant 1, mRNA [NM_001955]	1906	GO:0005515|GO:0019722|GO:0005615|GO:0006885|GO:0019229|GO:0007507|GO:0001516|GO:0014032|GO:0015758|GO:0032496|GO:0003100|GO:0031583|GO:0030335|GO:0043179|GO:0010193|GO:0030593|GO:0035994|GO:0044321|GO:0000122|GO:0001701|GO:0005125|GO:0014065|GO:0032269|GO:0010595|GO:0007186|GO:0005179|GO:0035815|GO:0016049|GO:0010460|GO:0035810|GO:0030072|GO:0008284|GO:0042482|GO:0030818|GO:0007267|GO:0010259|GO:…	12296731	chr6	12296672	+	hs|6p24.1	NM_001955	chr6:12296672-12296731	NM_001955	Hs.511899
A_23_P401	-7.67376	-2.93993	7.67376	down	CENPF	centromere protein F, 350/400kDa	FALSE	Homo sapiens centromere protein F, 350/400kDa (CENPF), mRNA [NM_016343]	1063	GO:0005515|GO:0007094|GO:0048471|GO:0008283|GO:0005634|GO:0005635|GO:0015031|GO:0042803|GO:0030154|GO:0016363|GO:0005829|GO:0005737|GO:0051382|GO:0007059|GO:0000086|GO:0051726|GO:0016202|GO:0000785|GO:0051310|GO:0042493|GO:0010389|GO:0005819|GO:0030496|GO:0008022|GO:0000940|GO:0000922|GO:0007067|GO:0045502|GO:0007517|GO:0071897|GO:0003682|GO:0000776|GO:0005654|GO:0045120|GO:0000278|GO:0045892|GO:…	214837367	chr1	214837308	+	hs|1q41	NM_016343	chr1:214837308-214837367	NM_016343	Hs.497741
A_23_P45917	-7.6411	-2.93378	7.6411	down	CKS1B	CDC28 protein kinase regulatory subunit 1B	FALSE	Homo sapiens CDC28 protein kinase regulatory subunit 1B (CKS1B), transcript variant 1, mRNA [NM_001826]	1163	GO:0005515|GO:0000082|GO:0008283|GO:0016538|GO:0005654|GO:0000079|GO:0000278|GO:0051301	154951586	chr1	154951527	+	hs|1q21.3	NM_001826	chr1:154951527-154951586	NM_001826	Hs.374378
A_33_P3370751	-7.6292	-2.93153	7.6292	down	SMURF2	SMAD specific E3 ubiquitin protein ligase 2	FALSE	Homo sapiens SMAD specific E3 ubiquitin protein ligase 2 (SMURF2), mRNA [NM_022739]	64750	GO:0005515|GO:0006511|GO:0010467|GO:0004842|GO:0006367|GO:0005886|GO:0016874|GO:0090263|GO:0000151|GO:0005634|GO:0046332|GO:0005829|GO:0042802|GO:0005737|GO:0042787|GO:0007179|GO:0017015|GO:0030579|GO:0030512|GO:0000122|GO:0030509|GO:0005160|GO:0006351|GO:0005654|GO:0045121|GO:0045892	62540794	chr17	62540735	-	hs|17q23.3	NM_022739	chr17:62540794-62540735	NM_022739	Hs.515011
A_33_P3407256	-7.59815	-2.92565	7.59815	down	TRIP13	thyroid hormone receptor interactor 13	FALSE	Homo sapiens thyroid hormone receptor interactor 13 (TRIP13), transcript variant 2, mRNA [NM_001166260]	9319	GO:0003712|GO:0005515|GO:0048477|GO:0006366|GO:0007286|GO:0005634|GO:0001556|GO:0007283|GO:0005524|GO:0042802|GO:0006302|GO:0007144|GO:0001673|GO:0007130|GO:0007141|GO:0007131	901529	chr5	901470	+	hs|5p15.33	NM_001166260	chr5:901470-901529	NM_001166260	Hs.436187
A_23_P12816	-7.58788	-2.9237	7.58788	down	HELLS	helicase, lymphoid-specific	FALSE	Homo sapiens helicase, lymphoid-specific (HELLS), transcript variant 1, mRNA [NM_018063]	3070	GO:0005515|GO:0031508|GO:0006346|GO:0004386|GO:0005634|GO:0007275|GO:0003677|GO:0005524|GO:0006351|GO:0007067|GO:0010216|GO:0005721|GO:0046651|GO:0000775|GO:0051301	96354540	chr10	96354481	+	hs|10q23.33	NM_018063	chr10:96354481-96354540	NM_018063	Hs.655830
A_19_P00321594	-7.58586	-2.92331	7.58586	down	FBXL5	F-box and leucine-rich repeat protein 5	FALSE	F-box and leucine-rich repeat protein 5 [Source:HGNC Symbol;Acc:HGNC:13602] [ENST00000514541]	26234	GO:0005515|GO:0048471|GO:0004842|GO:0016567|GO:0005506|GO:0000151|GO:0031146|GO:0055072|GO:0019005	15683099	chr4	15683040	-	hs|4p15.32	XR_425710	chr4:15683099-15683040	XR_425710	Hs.668190
A_23_P142239	-7.54351	-2.91524	7.54351	down	YIF1B	Yip1 interacting factor homolog B (S. cerevisiae)	FALSE	Homo sapiens Yip1 interacting factor homolog B (S. cerevisiae) (YIF1B), transcript variant 7, mRNA [NM_001145463]	90522	GO:0016021	38794313	chr19	38794254	-	hs|19q13.2	NM_001145463	chr19:38794313-38794254	NM_001145463	Hs.280741
A_23_P151150	-7.51543	-2.90986	7.51543	down	FOXM1	forkhead box M1	FALSE	Homo sapiens forkhead box M1 (FOXM1), transcript variant 1, mRNA [NM_202002]	2305	GO:0071156|GO:0005515|GO:0008284|GO:0003700|GO:0006366|GO:0044212|GO:0000981|GO:0090344|GO:0046578|GO:0001558|GO:0032873|GO:0005737|GO:0045944|GO:0000086|GO:0042127|GO:0051726|GO:0006978|GO:0006355|GO:0019901|GO:0000122|GO:0003677|GO:0001889|GO:0043565|GO:0007049|GO:0006281|GO:0005654|GO:2000377|GO:2000781|GO:0000278|GO:0045893|GO:0001570|GO:0045892	2967381	chr12	2967322	-	hs|12p13.33	NM_202002	chr12:2967381-2967322	NM_202002	Hs.239
A_23_P422193	-7.47967	-2.90297	7.47967	down	SUV39H1	suppressor of variegation 3-9 homolog 1 (Drosophila)	FALSE	Homo sapiens suppressor of variegation 3-9 homolog 1 (Drosophila) (SUV39H1), transcript variant 2, mRNA [NM_003173]	6839	GO:0005515|GO:0000792|GO:0010467|GO:0006364|GO:0006325|GO:0005634|GO:0030154|GO:0042054|GO:0036123|GO:0000183|GO:0036124|GO:0016032|GO:0000976|GO:0000794|GO:0071456|GO:0033553|GO:0008757|GO:0000122|GO:0006351|GO:0006974|GO:0018024|GO:0007049|GO:0047485|GO:0045814|GO:0003682|GO:0046974|GO:0005652|GO:0040029|GO:0005654|GO:0008270|GO:0048511|GO:0042754|GO:0045892|GO:0000775|GO:0005677	48566946	chrX	48566887	+	hs|Xp11.23	NM_003173	chrX:48566887-48566946	NM_003173	Hs.522639
A_33_P3309607	-7.44963	-2.89717	7.44963	down	SGOL2	shugoshin-like 2 (S. pombe)	FALSE	shugoshin-like 2 (S. pombe) [Source:HGNC Symbol;Acc:HGNC:30812] [ENST00000409203]	151246	GO:0005515|GO:0030892|GO:0000777|GO:0005654|GO:0051754|GO:0000278|GO:0000775|GO:0051301|GO:0005829	201434773	chr2	201434714	+	hs|2q33.1	BC048349	chr2:201434714-201434773		Hs.655182
A_23_P94422	-7.43606	-2.89454	7.43606	down	MELK	maternal embryonic leucine zipper kinase	FALSE	Homo sapiens maternal embryonic leucine zipper kinase (MELK), transcript variant 1, mRNA [NM_014791]	9833	GO:0030097|GO:0005515|GO:0043065|GO:0005886|GO:0008283|GO:0005509|GO:0008631|GO:0006915|GO:0018108|GO:0005524|GO:0008289|GO:0061351|GO:0046777|GO:0016020|GO:0004674|GO:0000086|GO:0004715|GO:0005938	36677251	chr9	36677192	+	hs|9p13.2	NM_014791	chr9:36677192-36677251	NM_014791	Hs.184339
A_23_P113393	-7.42715	-2.89281	7.42715	down	APLN	apelin	FALSE	Homo sapiens apelin (APLN), mRNA [NM_017413]	8862	GO:0007165|GO:0006955|GO:0001664|GO:0007595|GO:0005179|GO:0023052|GO:0005102|GO:0005576|GO:0005615|GO:0031704	128779470	chrX	128779411	-	hs|Xq26.1	NM_017413	chrX:128779470-128779411	NM_017413	Hs.303084
A_24_P100517	-7.42689	-2.89276	7.42689	down	SAPCD2	suppressor APC domain containing 2	FALSE	Homo sapiens suppressor APC domain containing 2 (SAPCD2), mRNA [NM_178448]	89958	GO:0005737|GO:0005730|GO:0005634	139957282	chr9	139957223	-	hs|9q34.3	NM_178448	chr9:139957282-139957223	NM_178448	Hs.19322
A_23_P70480	-7.41748	-2.89093	7.41748	down	HIST1H4L	histone cluster 1, H4l	FALSE	Homo sapiens histone cluster 1, H4l (HIST1H4L), mRNA [NM_003546]	8368	GO:0005515|GO:0010467|GO:0006325|GO:0005634|GO:0045653|GO:0000723|GO:0000183|GO:0000786|GO:0070062|GO:0035574|GO:0035575|GO:0046982|GO:0006334|GO:0006335|GO:0005576|GO:0006336|GO:0000228|GO:0003677|GO:0032776|GO:0034080|GO:0043234|GO:0016020|GO:0045814|GO:0040029|GO:0005654|GO:0000278	27841008	chr6	27840949	-	hs|6p22.1	NM_003546	chr6:27841008-27840949	NM_003546	Hs.533295
A_33_P3257808	-7.4065	-2.88879	7.4065	down	FANCD2	Fanconi anemia, complementation group D2	FALSE	Homo sapiens Fanconi anemia, complementation group D2 (FANCD2), transcript variant 2, mRNA [NM_001018115]	2177	GO:0007129|GO:0005515|GO:0000793|GO:0006281|GO:0005794|GO:0070182|GO:0007276|GO:0005654|GO:0010332|GO:0043231	10114640	chr3	10114581	+	hs|3p25.3	NM_001018115	chr3:10114581-10114640	NM_001018115	Hs.208388
A_33_P3374205	-7.40106	-2.88773	7.40106	down	MKI67	marker of proliferation Ki-67	FALSE	Homo sapiens marker of proliferation Ki-67 (MKI67), transcript variant 1, mRNA [NM_002417]	4288	GO:0005515|GO:0000793|GO:0005737|GO:0007126|GO:0016020|GO:0008283|GO:0005730|GO:0005634|GO:0008022|GO:0005524|GO:0000775	129913252	chr10	129913193	-	hs|10q26.2	NM_002417	chr10:129913252-129913193	NM_002417	Hs.80976
A_23_P403081	-7.3963	-2.8868	7.3963	down	C5orf34	chromosome 5 open reading frame 34	FALSE	Homo sapiens chromosome 5 open reading frame 34 (C5orf34), mRNA [NM_198566]	375444		43492836	chr5	43492367	-	hs|5p12	NM_198566	chr5:43492836-43492367	NM_198566	Hs.661641
A_23_P74115	-7.38784	-2.88515	7.38784	down	RAD54L	RAD54-like (S. cerevisiae)	FALSE	Homo sapiens RAD54-like (S. cerevisiae) (RAD54L), transcript variant 1, mRNA [NM_003579]	8438	GO:0005515|GO:0051276|GO:0042493|GO:0004386|GO:0005634|GO:0006310|GO:0003677|GO:0005524|GO:0000733|GO:0006281|GO:0007126|GO:0000724|GO:0010212|GO:0005654	46744097	chr1	46744038	+	hs|1p34.1	NM_003579	chr1:46744038-46744097	NM_003579	Hs.642042
A_33_P3246623	-7.36385	-2.88046	7.36385	down	CCDC18	coiled-coil domain containing 18	FALSE	Homo sapiens coiled-coil domain containing 18 (CCDC18), mRNA [NM_206886]	343099		93744270	chr1	93744211	+	hs|1p22.1	NM_206886	chr1:93744211-93744270	NM_206886	Hs.745125
A_33_P3242952	-7.36159	-2.88002	7.36159	down	FAM72A	family with sequence similarity 72, member A	FALSE	Homo sapiens family with sequence similarity 72, member A (FAM72A), mRNA [NM_001123168]	729533	GO:0005739	206145577	chr1	206145518	+	hs|1q32.1	NM_001123168	chr1:206145518-206145577	NM_001123168	Hs.661924
A_24_P940115	-7.35915	-2.87954	7.35915	down	DLC1	DLC1 Rho GTPase activating protein	FALSE	Homo sapiens DLC1 Rho GTPase activating protein (DLC1), transcript variant 1, mRNA [NM_182643]	10395	GO:0005515|GO:0008285|GO:0030036|GO:0007264|GO:0008360|GO:0035024|GO:0005634|GO:0021575|GO:0005829|GO:0008289|GO:0005737|GO:0048041|GO:0032956|GO:0030675|GO:0042169|GO:0051056|GO:0030336|GO:0006919|GO:0035307|GO:0006915|GO:0001843|GO:0005100|GO:0051497|GO:0003007|GO:0032321|GO:1900119|GO:0005901|GO:0030900|GO:0005925	12941781	chr8	12941722	-	hs|8p22	NM_182643	chr8:12941781-12941722	NM_182643	Hs.134296
A_23_P49459	-7.35463	-2.87865	7.35463	down	LOC81691	exonuclease NEF-sp	FALSE	Homo sapiens exonuclease NEF-sp (LOC81691), transcript variant 1, mRNA [NM_030941]	81691	GO:0004527|GO:0090305|GO:0000166|GO:0003723|GO:0005730|GO:0070062	20856077	chr16	20856018	+	hs|16p12.3	NM_030941	chr16:20856018-20856077	NM_030941	Hs.177926
A_33_P3376116	-7.32404	-2.87264	7.32404	down	SPC24	SPC24, NDC80 kinetochore complex component	FALSE	Homo sapiens SPC24, NDC80 kinetochore complex component (SPC24), mRNA [NM_182513]	147841	GO:0005515|GO:0007067|GO:0005730|GO:0000777|GO:0005634|GO:0000278|GO:0031262|GO:0051301|GO:0005829	11257912	chr19	11257853	-	hs|19p13.2	NM_182513	chr19:11257912-11257853	NM_182513	Hs.381225
A_33_P3350634	-7.30561	-2.869	7.30561	down	KIF22	kinesin family member 22	FALSE	Homo sapiens kinesin family member 22 (KIF22), transcript variant 3, mRNA [NM_001256270]	3835	GO:0008017|GO:0005871|GO:0005874|GO:0005819|GO:0005634|GO:0003777|GO:0003677|GO:0005524|GO:0005829|GO:0019886|GO:0007067|GO:0005737|GO:0006281|GO:0007596|GO:0007062|GO:0000776|GO:0005654|GO:0007080|GO:0016887|GO:0000785|GO:0005925|GO:0007018	29815385	chr16	29815326	+	hs|16p11.2	NM_001256270	chr16:29815326-29815385	NM_001256270	Hs.612151
A_33_P3258117	-7.28998	-2.86591	7.28998	down	HELLS	helicase, lymphoid-specific	FALSE	Homo sapiens helicase, lymphoid-specific (HELLS), transcript variant 7, mRNA [NM_001289072]	3070	GO:0005515|GO:0031508|GO:0006346|GO:0004386|GO:0005634|GO:0007275|GO:0003677|GO:0005524|GO:0006351|GO:0007067|GO:0010216|GO:0005721|GO:0046651|GO:0000775|GO:0051301	96334492	chr10	96334433	+	hs|10q23.33	NM_001289072	chr10:96334433-96334492	NM_001289072	Hs.655830
A_32_P95729	-7.2854	-2.86501	7.2854	down	FANCI	Fanconi anemia, complementation group I	FALSE	Homo sapiens Fanconi anemia, complementation group I (FANCI), transcript variant 2, mRNA [NM_018193]	55215	GO:0005515|GO:0007049|GO:0005737|GO:0006281|GO:0016020|GO:0005886|GO:0070182|GO:0031398|GO:0005654|GO:0005634|GO:0003677	89858587	chr15	89858528	+	hs|15q26.1	NM_018193	chr15:89858528-89858587	NM_018193	Hs.513126
A_23_P68547	-7.25866	-2.8597	7.25866	down	MCM8	minichromosome maintenance complex component 8	FALSE	Homo sapiens minichromosome maintenance complex component 8 (MCM8), transcript variant 2, mRNA [NM_182802]	84515	GO:0005515|GO:0004386|GO:0005634|GO:0007292|GO:0003677|GO:0005524|GO:0006974|GO:0006260|GO:0048232|GO:0000082|GO:0006271|GO:0000724|GO:0005654|GO:0000278	5975123	chr20	5975064	+	hs|20p12.3	NM_182802	chr20:5975064-5975123	NM_182802	Hs.597484
A_33_P3386723	-7.22643	-2.85328	7.22643	down			FALSE	keratin 18 pseudogene 64 [Source:HGNC Symbol;Acc:HGNC:48891] [ENST00000434946]			85998237	chr6	85998178	+	hs|6q14.3		chr6:85998178-85998237
A_33_P3269631	-7.22577	-2.85315	7.22577	down	NAALADL2	N-acetylated alpha-linked acidic dipeptidase-like 2	FALSE	N-acetylated alpha-linked acidic dipeptidase-like 2 [Source:HGNC Symbol;Acc:HGNC:23219] [ENST00000495900]	254827	GO:0016021	174269149	chr3	174269090	+	hs|3q26.31	BQ890675	chr3:174269090-174269149		Hs.603646
A_33_P3217238	-7.21556	-2.85111	7.21556	down	ATAD2	ATPase family, AAA domain containing 2	FALSE	Homo sapiens ATPase family, AAA domain containing 2 (ATAD2), mRNA [NM_014109]	29028	GO:0006200|GO:0005654|GO:0045893|GO:0016887|GO:0005524|GO:0006351|GO:0070062	124332837	chr8	124332778	-	hs|8q24.13	NM_014109	chr8:124332837-124332778	NM_014109	Hs.370834
A_24_P276888	-7.20625	-2.84925	7.20625	down	CENPO	centromere protein O	FALSE	Homo sapiens centromere protein O (CENPO), transcript variant 2, mRNA [NM_001199803]	79172	GO:0034080|GO:0006334|GO:0000777|GO:0005654|GO:0000278|GO:0005829	25044850	chr2	25044791	+	hs|2p23.3	NM_001199803	chr2:25044791-25044850	NM_001199803	Hs.731569
A_32_P189204	-7.19853	-2.8477	7.19853	down	GAS2L3	growth arrest-specific 2 like 3	FALSE	Homo sapiens growth arrest-specific 2 like 3 (GAS2L3), transcript variant 1, mRNA [NM_174942]	283431	GO:0008017|GO:0005515|GO:0005737|GO:0030036|GO:0015630|GO:0005874|GO:0000226|GO:0007050|GO:0003779|GO:0015629	101018653	chr12	101018594	+	hs|12q23.1	NM_174942	chr12:101018594-101018653	NM_174942	Hs.20575
A_23_P15844	-7.18082	-2.84415	7.18082	down	BRIP1	BRCA1 interacting protein C-terminal helicase 1	FALSE	Homo sapiens BRCA1 interacting protein C-terminal helicase 1 (BRIP1), mRNA [NM_032043]	83990	GO:0005515|GO:0031965|GO:0051539|GO:0006357|GO:0005634|GO:0044281|GO:0003677|GO:0005524|GO:0046872|GO:0006302|GO:0005737|GO:0004003|GO:0000077|GO:0032508	59760967	chr17	59760908	-	hs|17q23.2	NM_032043	chr17:59760967-59760908	NM_032043	Hs.128903
A_33_P3416366	-7.1439	-2.83671	7.1439	down	CHAF1A	chromatin assembly factor 1, subunit A (p150)	FALSE	Homo sapiens chromatin assembly factor 1, subunit A (p150) (CHAF1A), mRNA [NM_005483]	10036	GO:0005515|GO:0000790|GO:0006355|GO:0033186|GO:0070087|GO:0006335|GO:0006351|GO:0042802|GO:0006260|GO:0043234|GO:0007049|GO:0006281|GO:0006461|GO:0031497|GO:0003682|GO:0051082	4432024	chr19	4431965	+	hs|19p13.3	NM_005483	chr19:4431965-4432024	NM_005483	Hs.79018
A_33_P3380346	-7.14247	-2.83642	7.14247	down	WHSC1	Wolf-Hirschhorn syndrome candidate 1	FALSE	Homo sapiens Wolf-Hirschhorn syndrome candidate 1 (WHSC1), transcript variant 1, mRNA [NM_133330]	7468	GO:2001032|GO:0005515|GO:0003289|GO:0034770|GO:0005694|GO:0048298|GO:0010452|GO:0006325|GO:0005634|GO:0000122|GO:0009653|GO:0003290|GO:0006351|GO:0018024|GO:0043565|GO:0060348|GO:0005737|GO:0003149|GO:0003682|GO:0070201|GO:0005654|GO:0008270	1980558	chr4	1980499	+	hs|4p16.3	NM_133330	chr4:1980499-1980558	NM_133330	Hs.113876
A_24_P462899	-7.14046	-2.83602	7.14046	down	CENPW	centromere protein W	FALSE	Homo sapiens centromere protein W (CENPW), transcript variant 2, mRNA [NM_001012507]	387103	GO:0005515|GO:0051276|GO:0046982|GO:0005730|GO:0006334|GO:0003677|GO:0016363|GO:0034080|GO:0007067|GO:0051382|GO:0007059|GO:0000777|GO:0000776|GO:0005654|GO:0000278|GO:0000775|GO:0051301	126669682	chr6	126669623	+	hs|6q22.32	NM_001012507	chr6:126669623-126669682	NM_001012507	Hs.486401
A_33_P3254606	-7.12581	-2.83305	7.12581	down	WDR62	WD repeat domain 62	FALSE	Homo sapiens WD repeat domain 62 (WDR62), transcript variant 1, mRNA [NM_001083961]	284403	GO:0005737|GO:0000922|GO:0021987|GO:0005654|GO:0005634|GO:0022008	36596011	chr19	36595952	+	hs|19q13.12	NM_001083961	chr19:36595952-36596011	NM_001083961	Hs.116244
A_24_P399888	-7.12305	-2.83249	7.12305	down	CENPM	centromere protein M	FALSE	centromere protein M [Source:HGNC Symbol;Acc:HGNC:18352] [ENST00000396437]	79019	GO:0034080|GO:0006334|GO:0000777|GO:0005654|GO:0000278|GO:0005829	42341956	chr22	42341289	-	hs|22q13.2	XR_244383	chr22:42341956-42341289	XR_244383	Hs.208912
A_33_P3340040	-7.09861	-2.82754	7.09861	down	GINS4	GINS complex subunit 4 (Sld5 homolog)	FALSE	Homo sapiens GINS complex subunit 4 (Sld5 homolog) (GINS4), mRNA [NM_032336]	84296	GO:0005515|GO:0006271|GO:0005737|GO:0001833|GO:0005654|GO:0000278	41402101	chr8	41402042	+	hs|8p11.21	NM_032336	chr8:41402042-41402101	NM_032336	Hs.656996
A_24_P166407	-7.08091	-2.82393	7.08091	down	HIST1H4B	histone cluster 1, H4b	FALSE	Homo sapiens histone cluster 1, H4b (HIST1H4B), mRNA [NM_003544]	8366	GO:0005515|GO:0010467|GO:0006325|GO:0005634|GO:0045653|GO:0000723|GO:0000183|GO:0000786|GO:0070062|GO:0035574|GO:0035575|GO:0046982|GO:0006334|GO:0006335|GO:0005576|GO:0006336|GO:0000228|GO:0003677|GO:0032776|GO:0034080|GO:0043234|GO:0016020|GO:0045814|GO:0040029|GO:0005654|GO:0000278	26027208	chr6	26027149	-	hs|6p22.2	NM_003544	chr6:26027208-26027149	NM_003544	Hs.143080
A_24_P66027	-7.03826	-2.81522	7.03826	down	APOBEC3B	apolipoprotein B mRNA editing enzyme, catalytic polypeptide-like 3B	FALSE	Homo sapiens apolipoprotein B mRNA editing enzyme, catalytic polypeptide-like 3B (APOBEC3B), transcript variant 1, mRNA [NM_004900]	9582	GO:0051607|GO:0047844|GO:0045087|GO:0008152|GO:0008270|GO:0005634|GO:0010529	39387597	chr22	39387538	+	hs|22q13.1	NM_004900	chr22:39387538-39387597	NM_004900	Hs.226307
A_23_P46539	-7.03755	-2.81507	7.03755	down	PSRC1	proline/serine-rich coiled-coil 1	FALSE	Homo sapiens proline/serine-rich coiled-coil 1 (PSRC1), transcript variant 1, mRNA [NM_032636]	84722	GO:0005515|GO:0008017|GO:0031116|GO:0030308|GO:0060236|GO:0001578|GO:0005819|GO:0045737|GO:0030496|GO:0005829|GO:0000922|GO:0005737|GO:0015630|GO:0005654|GO:0005876|GO:0007080|GO:0045893|GO:0051301	109822518	chr1	109822459	-	hs|1p13.3	NM_032636	chr1:109822518-109822459	NM_032636	Hs.405925
A_33_P3303245	-7.03179	-2.81389	7.03179	down	KIT	v-kit Hardy-Zuckerman 4 feline sarcoma viral oncogene homolog	FALSE	Homo sapiens v-kit Hardy-Zuckerman 4 feline sarcoma viral oncogene homolog (KIT), transcript variant 2, mRNA [NM_001093772]	3815	GO:0005515|GO:0008360|GO:0019221|GO:0007286|GO:0007283|GO:0002020|GO:0005615|GO:0042803|GO:0035234|GO:0043069|GO:0043552|GO:0007173|GO:0042127|GO:0031274|GO:0002327|GO:0038162|GO:0023014|GO:0002320|GO:0043303|GO:0030335|GO:0006687|GO:0031532|GO:0032762|GO:0014068|GO:0018108|GO:0035855|GO:0019955|GO:0008543|GO:0045087|GO:0008542|GO:0038093|GO:0002371|GO:0009898|GO:0002318|GO:0038095|GO:0009897|GO:…	55570024	chr4	55569965	+	hs|4q12	NM_001093772	chr4:55569965-55570024	NM_001093772	Hs.479754
A_23_P126120	-7.01208	-2.80984	7.01208	down	CENPL	centromere protein L	FALSE	Homo sapiens centromere protein L (CENPL), transcript variant 2, mRNA [NM_033319]	91687	GO:0034080|GO:0006334|GO:0005654|GO:0000278|GO:0000775|GO:0005829	173772182	chr1	173772123	-	hs|1q25.1	NM_033319	chr1:173772182-173772123	NM_033319	Hs.720473
A_23_P116387	-7.00899	-2.80921	7.00899	down	INCENP	inner centromere protein antigens 135/155kDa	FALSE	Homo sapiens inner centromere protein antigens 135/155kDa (INCENP), transcript variant 1, mRNA [NM_001040694]	3619	GO:0005515|GO:0010369|GO:0005874|GO:0005819|GO:0030496|GO:0000801|GO:0000800|GO:0005829|GO:0043234|GO:0000910|GO:0007067|GO:0005721|GO:0007059|GO:0000777|GO:0000776|GO:0000278|GO:0000775	61919801	chr11	61919742	+	hs|11q12.3	NM_001040694	chr11:61919742-61919801	NM_001040694	Hs.142179
A_23_P117852	-6.98795	-2.80487	6.98795	down	KIAA0101	KIAA0101	FALSE	Homo sapiens KIAA0101 (KIAA0101), transcript variant 1, mRNA [NM_014736]	9768	GO:0051297|GO:0006260|GO:0005515|GO:0048471|GO:0005737|GO:0003682|GO:0051726|GO:0005634|GO:0019985|GO:0009411|GO:0006974	64657906	chr15	64657847	-	hs|15q22.31	NM_014736	chr15:64657906-64657847	NM_014736	Hs.81892
A_23_P133123	-6.97836	-2.80289	6.97836	down	MND1	meiotic nuclear divisions 1 homolog (S. cerevisiae)	FALSE	Homo sapiens meiotic nuclear divisions 1 homolog (S. cerevisiae) (MND1), transcript variant 1, mRNA [NM_032117]	84057	GO:0051321|GO:0006310|GO:0005634|GO:0003677	154336044	chr4	154335985	+	hs|4q31.3	NM_032117	chr4:154335985-154336044	NM_032117	Hs.294088
A_33_P3217819	-6.96616	-2.80036	6.96616	down	CCNE2	cyclin E2	FALSE	Homo sapiens cyclin E2 (CCNE2), mRNA [NM_057749]	9134	GO:0005515|GO:0000082|GO:0006270|GO:0000075|GO:0016538|GO:0005654|GO:0000079|GO:0000278|GO:0051301|GO:0005829	95894420	chr8	95894361	-	hs|8q22.1	NM_057749	chr8:95894420-95894361	NM_057749	Hs.521693
A_33_P3339361	-6.96324	-2.79976	6.96324	down	ARHGAP11A	Rho GTPase activating protein 11A	FALSE	Homo sapiens Rho GTPase activating protein 11A (ARHGAP11A), transcript variant 2, mRNA [NM_199357]	9824	GO:0043547|GO:0051056|GO:0007264|GO:0005829|GO:0005096	32928143	chr15	32928084	+	hs|15q13.3	NM_199357	chr15:32928084-32928143	NM_199357	Hs.591130
A_33_P3258392	-6.95973	-2.79903	6.95973	down	EDN1	endothelin 1	FALSE	Homo sapiens endothelin 1 (EDN1), transcript variant 1, mRNA [NM_001955]	1906	GO:0005515|GO:0019722|GO:0005615|GO:0006885|GO:0019229|GO:0007507|GO:0001516|GO:0014032|GO:0015758|GO:0032496|GO:0003100|GO:0031583|GO:0030335|GO:0043179|GO:0010193|GO:0030593|GO:0035994|GO:0044321|GO:0000122|GO:0001701|GO:0005125|GO:0014065|GO:0032269|GO:0010595|GO:0007186|GO:0005179|GO:0035815|GO:0016049|GO:0010460|GO:0035810|GO:0030072|GO:0008284|GO:0042482|GO:0030818|GO:0007267|GO:0010259|GO:…	12296277	chr6	12296218	+	hs|6p24.1	NM_001955	chr6:12296218-12296277	NM_001955	Hs.511899
A_23_P119254	-6.89219	-2.78496	6.89219	down	ASF1B	anti-silencing function 1B histone chaperone	FALSE	Homo sapiens anti-silencing function 1B histone chaperone (ASF1B), mRNA [NM_018154]	55723	GO:0005515|GO:0000790|GO:0006355|GO:0006335|GO:0006336|GO:0007275|GO:0007283|GO:0006351|GO:0030154|GO:0042393|GO:0043234|GO:0005654|GO:0016568	14230697	chr19	14230638	-	hs|19p13.12	NM_018154	chr19:14230697-14230638	NM_018154	Hs.26516
A_33_P3340025	-6.88455	-2.78336	6.88455	down	GINS1	GINS complex subunit 1 (Psf1 homolog)	FALSE	Homo sapiens GINS complex subunit 1 (Psf1 homolog) (GINS1), mRNA [NM_021067]	9837	GO:0006271|GO:0005737|GO:0001833|GO:0005654|GO:0005634|GO:0000278	25429170	chr20	25429111	+	hs|20p11.21	NM_021067	chr20:25429111-25429170	NM_021067	Hs.658464
A_23_P161615	-6.87236	-2.78081	6.87236	down	POLA2	polymerase (DNA directed), alpha 2, accessory subunit	FALSE	polymerase (DNA directed), alpha 2, accessory subunit [Source:HGNC Symbol;Acc:HGNC:30073] [ENST00000534785]	23649	GO:0046982|GO:0005658|GO:0003887|GO:0003677|GO:0006260|GO:0003674|GO:0006271|GO:0000082|GO:0005737|GO:0071897|GO:0000723|GO:0006270|GO:0000722|GO:0005654|GO:0000278|GO:0032201|GO:0000060	65063057	chr11	65062111	+	hs|11q13.1	AK307831	chr11:65062111-65063057		Hs.201897
A_24_P500422	-6.82279	-2.77036	6.82279	down	LOC730101	uncharacterized LOC730101	FALSE	Homo sapiens uncharacterized LOC730101 (LOC730101), transcript variant 1, long non-coding RNA [NR_024403]	730101		52533095	chr6	52533036	+	hs|6p12.2	NR_024403	chr6:52533036-52533095	NR_024403	Hs.7921
A_24_P169843	-6.81775	-2.7693	6.81775	down			FALSE	keratin 18 pseudogene 28 [Source:HGNC Symbol;Acc:HGNC:33397] [ENST00000453838]			182928250	chr1	182928209	-	hs|1q25.3		chr1:182928250-182928209
A_33_P3381513	-6.80896	-2.76744	6.80896	down	CD274	CD274 molecule	FALSE	Homo sapiens CD274 molecule (CD274), transcript variant 1, mRNA [NM_014143]	29126	GO:0005515|GO:2001181|GO:0070232|GO:0005886|GO:0032693|GO:0046006|GO:0046007|GO:0031295|GO:0012505|GO:0007165|GO:0006955|GO:0042102|GO:0016021|GO:0032689|GO:0007166|GO:0009897|GO:0070062	5465605	chr9	5465546	+	hs|9p24.1	NM_014143	chr9:5465546-5465605	NM_014143	Hs.521989
A_24_P42136	-6.79974	-2.76548	6.79974	down	KRT18	keratin 18, type I	FALSE	Homo sapiens keratin 18, type I (KRT18), transcript variant 1, mRNA [NM_000224]	3875	GO:0005515|GO:0005882|GO:0048471|GO:0043066|GO:0005815|GO:0045104|GO:0034451|GO:0097284|GO:0005730|GO:0097191|GO:0009653|GO:0033209|GO:0071944|GO:0005737|GO:0007049|GO:0005198|GO:0097110|GO:0016032|GO:0045095|GO:0043000|GO:0070062	53345636	chr12	53345577	+	hs|12q13.13	NM_000224	chr12:53345577-53345636	NM_000224	Hs.406013
A_33_P3230017	-6.79668	-2.76483	6.79668	down	AURKAPS1	aurora kinase A pseudogene 1	FALSE	Homo sapiens aurora kinase A pseudogene 1 (AURKAPS1), non-coding RNA [NR_001587]	6791		220439717	chr1	220439658	-	hs|1q41	NR_001587	chr1:220439717-220439658	NR_001587	Hs.744357
A_33_P3374210	-6.77628	-2.76049	6.77628	down	MKI67	marker of proliferation Ki-67	FALSE	Homo sapiens marker of proliferation Ki-67 (MKI67), transcript variant 1, mRNA [NM_002417]	4288	GO:0005515|GO:0000793|GO:0005737|GO:0007126|GO:0016020|GO:0008283|GO:0005730|GO:0005634|GO:0008022|GO:0005524|GO:0000775	129907639	chr10	129907580	-	hs|10q26.2	NM_002417	chr10:129907639-129907580	NM_002417	Hs.80976
A_23_P356021	-6.77362	-2.75993	6.77362	down	FANCB	Fanconi anemia, complementation group B	FALSE	Homo sapiens Fanconi anemia, complementation group B (FANCB), transcript variant 1, mRNA [NM_001018113]	2187	GO:0005515|GO:0006281|GO:0005654|GO:0043240	14862096	chrX	14862037	-	hs|Xp22.2	NM_001018113	chrX:14862096-14862037	NM_001018113	Hs.554740
A_23_P23303	-6.76973	-2.7591	6.76973	down	EXO1	exonuclease 1	FALSE	Homo sapiens exonuclease 1 (EXO1), transcript variant 3, mRNA [NM_003686]	9156	GO:0005515|GO:0051321|GO:0035312|GO:0008409|GO:0090305|GO:0045190|GO:0051908|GO:0005634|GO:0006310|GO:0016446|GO:0003677|GO:0046872|GO:0004527|GO:0006281|GO:0045145|GO:0004523|GO:0043566|GO:0048256|GO:0005654|GO:0006298|GO:0000737|GO:0000738|GO:0002455	242048776	chr1	242048717	+	hs|1q43	NM_003686	chr1:242048717-242048776	NM_003686	Hs.498248
A_23_P208880	-6.74003	-2.75276	6.74003	down	UHRF1	ubiquitin-like with PHD and ring finger domains 1	FALSE	Homo sapiens ubiquitin-like with PHD and ring finger domains 1 (UHRF1), transcript variant 2, mRNA [NM_013282]	29128	GO:2000373|GO:0005515|GO:0000987|GO:0000792|GO:0010467|GO:0004842|GO:0000790|GO:0008327|GO:0003700|GO:0000791|GO:0008283|GO:0005657|GO:0016874|GO:0005634|GO:0035064|GO:0016363|GO:0042802|GO:0042393|GO:0010216|GO:0042787|GO:0045944|GO:0016574|GO:0000122|GO:0031493|GO:0006351|GO:0051865|GO:0032776|GO:0032270|GO:0007049|GO:0006281|GO:0040029|GO:0008270|GO:0010390	4962124	chr19	4962065	+	hs|19p13.3	NM_013282	chr19:4962065-4962124	NM_013282	Hs.108106
A_23_P141965	-6.69895	-2.74394	6.69895	down	HAUS8	HAUS augmin-like complex, subunit 8	FALSE	Homo sapiens HAUS augmin-like complex, subunit 8 (HAUS8), transcript variant 1, mRNA [NM_033417]	93323	GO:0051297|GO:0003674|GO:0007067|GO:0005813|GO:0005737|GO:0000922|GO:0005874|GO:0070652|GO:0051225|GO:0051301	17160709	chr19	17160650	-	hs|19p13.11	NM_033417	chr19:17160709-17160650	NM_033417	Hs.404088
A_19_P00810815	-6.68788	-2.74155	6.68788	down			FALSE				107617704	chr8	107617645	-	hs|8q23.1		chr8:107617704-107617645
A_23_P216556	-6.68397	-2.74071	6.68397	down	EPB41L4B	erythrocyte membrane protein band 4.1 like 4B	FALSE	Homo sapiens erythrocyte membrane protein band 4.1 like 4B (EPB41L4B), transcript variant 1, mRNA [NM_018424]	54566	GO:0008092|GO:0005737|GO:0005200|GO:0045177|GO:0031032|GO:0005856|GO:0019898	112002981	chr9	112002922	-	hs|9q31.3	NM_018424	chr9:112002981-112002922	NM_018424	Hs.591901
A_23_P163099	-6.67518	-2.73881	6.67518	down	POLE2	polymerase (DNA directed), epsilon 2, accessory subunit	FALSE	Homo sapiens polymerase (DNA directed), epsilon 2, accessory subunit (POLE2), transcript variant 1, mRNA [NM_002692]	5427	GO:0042276|GO:0008622|GO:0003887|GO:0003677|GO:0043231|GO:0006260|GO:0006261|GO:0000082|GO:0006281|GO:0000723|GO:0006270|GO:0006283|GO:0000722|GO:0006297|GO:0005654|GO:0006289|GO:0000278|GO:0032201	50122470	chr14	50122411	-	hs|14q21.3	NM_002692	chr14:50122470-50122411	NM_002692	Hs.162777
A_33_P3302125	-6.66759	-2.73717	6.66759	down	LCE2A	late cornified envelope 2A	FALSE	Homo sapiens late cornified envelope 2A (LCE2A), mRNA [NM_178428]	353139	GO:0031424	152671918	chr1	152671859	+	hs|1q21.3	NM_178428	chr1:152671859-152671918	NM_178428	Hs.334054
A_23_P50096	-6.65047	-2.73346	6.65047	down	TYMS	thymidylate synthetase	FALSE	Homo sapiens thymidylate synthetase (TYMS), mRNA [NM_001071]	7298	GO:0046683|GO:0051216|GO:0045471|GO:0033189|GO:0031100|GO:0005743|GO:0005634|GO:0044281|GO:0003729|GO:0032259|GO:0060574|GO:0042803|GO:0004799|GO:0005829|GO:0005739|GO:0019860|GO:0005737|GO:0005542|GO:0000082|GO:0048589|GO:0046134|GO:0000083|GO:0000166|GO:0005759|GO:0008144|GO:0046653|GO:0034097|GO:0009157|GO:0019088|GO:0048037|GO:0042493|GO:0007568|GO:0005730|GO:0006231|GO:0009636|GO:0055086|GO:…	673335	chr18	673276	+	hs|18p11.32	NM_001071	chr18:673276-673335	NM_001071	Hs.369762
A_23_P170491	-6.62545	-2.72802	6.62545	down	TRAIP	TRAF interacting protein	FALSE	Homo sapiens TRAF interacting protein (TRAIP), mRNA [NM_005879]	10293	GO:0035556|GO:0005515|GO:0007165|GO:0048471|GO:0004842|GO:0016567|GO:0008283|GO:0016874|GO:0005730|GO:0006915|GO:0008270|GO:0005057	49866144	chr3	49866085	-	hs|3p21.31	NM_005879	chr3:49866144-49866085	NM_005879	Hs.517972
A_33_P3270657	-6.62033	-2.7269	6.62033	down	FAM111B	family with sequence similarity 111, member B	FALSE	Homo sapiens family with sequence similarity 111, member B (FAM111B), transcript variant 1, mRNA [NM_198947]	374393	GO:0008152|GO:0003824	58894860	chr11	58894801	+	hs|11q12.1	NM_198947	chr11:58894801-58894860	NM_198947	Hs.186579
A_23_P74162	-6.61641	-2.72605	6.61641	down	IQCC	IQ motif containing C	FALSE	Homo sapiens IQ motif containing C (IQCC), transcript variant 2, mRNA [NM_018134]	55721		32673627	chr1	32673568	+	hs|1p35.1	NM_018134	chr1:32673568-32673627	NM_018134	Hs.274356
A_19_P00321009	-6.59594	-2.72158	6.59594	down	LINC01133	long intergenic non-protein coding RNA 1133	FALSE	Homo sapiens long intergenic non-protein coding RNA 1133 (LINC01133), long non-coding RNA [NR_038849]	100505633		159946518	chr1	159946459	+	hs|1q23.2	NR_038849	chr1:159946459-159946518	NR_038849	Hs.445045
A_33_P3392698	-6.59042	-2.72037	6.59042	down	SPIN4	spindlin family, member 4	FALSE	Homo sapiens spindlin family, member 4 (SPIN4), mRNA [NM_001012968]	139886	GO:0007276	62570027	chrX	62569968	-	hs|Xq11.1	NM_001012968	chrX:62570027-62569968	NM_001012968	Hs.612782
A_23_P253752	-6.58089	-2.71828	6.58089	down	MTFR2	mitochondrial fission regulator 2	FALSE	Homo sapiens mitochondrial fission regulator 2 (MTFR2), transcript variant 2, mRNA [NM_138419]	113115	GO:0009060|GO:0005739|GO:0000266|GO:0007005	136552451	chr6	136552392	-	hs|6q23.3	NM_138419	chr6:136552451-136552392	NM_138419	Hs.121536
A_33_P3386262	-6.56266	-2.71428	6.56266	down	CDT1	chromatin licensing and DNA replication factor 1	FALSE	Homo sapiens chromatin licensing and DNA replication factor 1 (CDT1), mRNA [NM_030928]	81620	GO:0006260|GO:0005515|GO:0000082|GO:0033262|GO:0030174|GO:0000083|GO:0000076|GO:0005654|GO:0005634|GO:0000278|GO:0003677|GO:0005829	88875665	chr16	88875606	+	hs|16q24.3	NM_030928	chr16:88875606-88875665	NM_030928	Hs.122908
A_24_P83678	-6.55068	-2.71164	6.55068	down	MMS22L	MMS22-like, DNA repair protein	FALSE	Homo sapiens MMS22-like, DNA repair protein (MMS22L), mRNA [NM_198468]	253714	GO:0005515|GO:0042555|GO:0035101|GO:0000724|GO:0031297|GO:0005654|GO:0043596	97597747	chr6	97594723	-	hs|6q16.1	NM_198468	chr6:97597747-97594723	NM_198468	Hs.444292
A_23_P408955	-6.54627	-2.71067	6.54627	down	E2F2	E2F transcription factor 2	FALSE	Homo sapiens E2F transcription factor 2 (E2F2), mRNA [NM_004091]	1870	GO:0005515|GO:0005667|GO:0006355|GO:0006367|GO:0003700|GO:0072332|GO:0051726|GO:0005654|GO:0001047|GO:0000278|GO:0003677|GO:0008134	23832992	chr1	23832933	-	hs|1p36.12	NM_004091	chr1:23832992-23832933	NM_004091	Hs.194333
A_33_P3214446	-6.5339	-2.70794	6.5339	down	RFC3	replication factor C (activator 1) 3, 38kDa	FALSE	Homo sapiens replication factor C (activator 1) 3, 38kDa (RFC3), transcript variant 2, mRNA [NM_181558]	5983	GO:0046683|GO:0005515|GO:0003689|GO:0005634|GO:0003677|GO:0006260|GO:0006271|GO:0006281|GO:0000723|GO:0006283|GO:0000722|GO:0000731|GO:0006297|GO:0005654|GO:0005663|GO:0006289|GO:0000278|GO:0016887|GO:0032201	34409353	chr13	34409294	+	hs|13q13.2	NM_181558	chr13:34409294-34409353	NM_181558	Hs.115474
A_33_P3387646	-6.52645	-2.7063	6.52645	down	LOC643201	centrosomal protein 192kDa pseudogene	FALSE	Homo sapiens centrosomal protein 192kDa pseudogene (LOC643201), non-coding RNA [NR_036494]	643201		175602897	chr5	175602838	-	hs|5q35.2	NR_036494	chr5:175602897-175602838	NR_036494	Hs.390285
A_33_P3258223	-6.50218	-2.70092	6.50218	down	MCM7	minichromosome maintenance complex component 7	FALSE	Homo sapiens minichromosome maintenance complex component 7 (MCM7), transcript variant 1, mRNA [NM_005916]	4176	GO:0005515|GO:0042555|GO:0008283|GO:0042493|GO:0003677|GO:0005524|GO:0006974|GO:0005829|GO:0006260|GO:0042325|GO:0006271|GO:0000082|GO:0005737|GO:0004003|GO:0016020|GO:0003697|GO:0071364|GO:0006270|GO:0006268|GO:0005654|GO:0000278|GO:0000785	99697336	chr7	99697277	-	hs|7q22.1	NM_005916	chr7:99697336-99697277	NM_005916	Hs.438720
A_24_P84898	-6.46591	-2.69285	6.46591	down	FEN1	flap structure-specific endonuclease 1	FALSE	Homo sapiens flap structure-specific endonuclease 1 (FEN1), mRNA [NM_004111]	2237	GO:0005515|GO:0009650|GO:0008409|GO:0090305|GO:0005886|GO:0005634|GO:0006302|GO:0005739|GO:0004527|GO:0006271|GO:0003690|GO:0000723|GO:0004523|GO:0000722|GO:0007613|GO:0008309|GO:0030145|GO:0000287|GO:0005730|GO:0003677|GO:0003684|GO:0006260|GO:0004519|GO:0006281|GO:0016020|GO:0006284|GO:0005654|GO:0043137|GO:0017108|GO:0000278|GO:0000737|GO:0032201|GO:0000738	61564087	chr11	61564029	+	hs|11q12.2	NM_004111	chr11:61564029-61564087	NM_004111	Hs.409065
A_33_P3312301	-6.4528	-2.68993	6.4528	down	CIT	citron rho-interacting serine/threonine kinase	FALSE	Homo sapiens citron rho-interacting serine/threonine kinase (CIT), transcript variant 1, mRNA [NM_001206999]	11113	GO:0005515|GO:0017124|GO:0005886|GO:0048699|GO:0007283|GO:0015629|GO:0046872|GO:0035556|GO:0000910|GO:0005083|GO:0000086|GO:0043025|GO:0007030|GO:0007091|GO:0005773|GO:0032467|GO:0031985|GO:0030165|GO:0005524|GO:0001726|GO:0016358|GO:0050790|GO:0007067|GO:0000070|GO:0016020|GO:0004674|GO:0008064|GO:0050774|GO:0006468|GO:0017048	120125704	chr12	120125645	-	hs|12q24.23	NM_001206999	chr12:120125704-120125645	NM_001206999	Hs.119594
A_23_P78543	-6.43308	-2.68551	6.43308	down	AP1M2	adaptor-related protein complex 1, mu 2 subunit	FALSE	Homo sapiens adaptor-related protein complex 1, mu 2 subunit (AP1M2), transcript variant 2, mRNA [NM_005498]	10053	GO:0030131|GO:0006892|GO:0006605|GO:0005765|GO:0032588|GO:0006903|GO:0050690|GO:0005829|GO:0043231|GO:0019886|GO:0030665|GO:0000139|GO:0061024|GO:0016032|GO:0030659	10685629	chr19	10685159	-	hs|19p13.2	NM_005498	chr19:10685629-10685159	NM_005498	Hs.18894
A_33_P3258339	-6.41227	-2.68084	6.41227	down	LRRC75A	leucine rich repeat containing 75A	FALSE	Homo sapiens leucine rich repeat containing 75A (LRRC75A), transcript variant 1, mRNA [NM_001113567]	388341		16346634	chr17	16346575	-	hs|17p11.2	NM_001113567	chr17:16346634-16346575	NM_001113567	Hs.25425
A_33_P3218450	-6.38454	-2.67458	6.38454	down	CDC6	cell division cycle 6	FALSE	Homo sapiens cell division cycle 6 (CDC6), mRNA [NM_001254]	990	GO:0005515|GO:0008285|GO:0005634|GO:0000079|GO:0051233|GO:0005829|GO:0005737|GO:0000082|GO:0000083|GO:0000166|GO:0019900|GO:0005794|GO:0032467|GO:0051984|GO:0005524|GO:0007089|GO:0006260|GO:0000922|GO:0007067|GO:0003682|GO:0000076|GO:0005654|GO:0008156|GO:0030071|GO:0000278|GO:0051301	38459413	chr17	38459354	+	hs|17q21.2	NM_001254	chr17:38459354-38459413	NM_001254	Hs.405958
A_33_P3377691	-6.37712	-2.6729	6.37712	down	C4orf46	chromosome 4 open reading frame 46	FALSE	Homo sapiens chromosome 4 open reading frame 46 (C4orf46), transcript variant 1, mRNA [NM_001008393]	201725		159589571	chr4	159589512	-	hs|4q32.1	NM_001008393	chr4:159589571-159589512	NM_001008393	Hs.380920
A_33_P3286208	-6.36335	-2.66979	6.36335	down	LRR1	leucine rich repeat protein 1	FALSE	Homo sapiens leucine rich repeat protein 1 (LRR1), transcript variant 3, mRNA [NM_203467]	122769	GO:0016567	50065759	chr14	50065700	+	hs|14q21.3	NM_203467	chr14:50065700-50065759	NM_203467	Hs.451090
A_23_P420551	-6.35303	-2.66745	6.35303	down	CIT	citron rho-interacting serine/threonine kinase	FALSE	Homo sapiens citron rho-interacting serine/threonine kinase (CIT), transcript variant 2, mRNA [NM_007174]	11113	GO:0005515|GO:0017124|GO:0005886|GO:0048699|GO:0007283|GO:0015629|GO:0046872|GO:0035556|GO:0000910|GO:0005083|GO:0000086|GO:0043025|GO:0007030|GO:0007091|GO:0005773|GO:0032467|GO:0031985|GO:0030165|GO:0005524|GO:0001726|GO:0016358|GO:0050790|GO:0007067|GO:0000070|GO:0016020|GO:0004674|GO:0008064|GO:0050774|GO:0006468|GO:0017048	120123690	chr12	120123631	-	hs|12q24.23	NM_007174	chr12:120123690-120123631	NM_007174	Hs.119594
A_24_P397107	-6.34411	-2.66542	6.34411	down	CDC25A	cell division cycle 25A	FALSE	Homo sapiens cell division cycle 25A (CDC25A), transcript variant 1, mRNA [NM_001789]	993	GO:0005515|GO:0009314|GO:0019901|GO:0008283|GO:0000079|GO:0035335|GO:0005829|GO:0006260|GO:0034644|GO:0000082|GO:0007067|GO:0000086|GO:0051726|GO:0005654|GO:0000278|GO:0004725|GO:0051301	48199183	chr3	48199124	-	hs|3p21.31	NM_001789	chr3:48199183-48199124	NM_001789	Hs.437705
A_24_P48248	-6.32336	-2.66069	6.32336	down	C17orf53	chromosome 17 open reading frame 53	FALSE	Homo sapiens chromosome 17 open reading frame 53 (C17orf53), transcript variant 1, mRNA [NM_024032]	78995		42232714	chr17	42232655	+	hs|17q21.31	NM_024032	chr17:42232655-42232714	NM_024032	Hs.437059
A_23_P311144	-6.28078	-2.65094	6.28078	down	CCDC138	coiled-coil domain containing 138	FALSE	Homo sapiens coiled-coil domain containing 138 (CCDC138), transcript variant 1, mRNA [NM_144978]	165055		109473408	chr2	109473349	+	hs|2q12.3	NM_144978	chr2:109473349-109473408	NM_144978	Hs.731709
A_33_P3411907	-6.26297	-2.64685	6.26297	down	FGF5	fibroblast growth factor 5	FALSE	Homo sapiens fibroblast growth factor 5 (FGF5), transcript variant 2, mRNA [NM_033143]	2250	GO:0008286|GO:0048011|GO:0008284|GO:0008283|GO:0023019|GO:0048015|GO:0007267|GO:0005104|GO:0005576|GO:0005615|GO:0007399|GO:0007173|GO:0008543|GO:0045087|GO:0010001|GO:0051781|GO:0008083|GO:0038095	81188152	chr4	81188093	+	hs|4q21.21	NM_033143	chr4:81188093-81188152	NM_033143	Hs.37055
A_23_P160460	-6.25692	-2.64545	6.25692	down	UAP1	UDP-N-acetylglucosamine pyrophosphorylase 1	FALSE	Homo sapiens UDP-N-acetylglucosamine pyrophosphorylase 1 (UAP1), mRNA [NM_003115]	6675	GO:0005737|GO:0003977|GO:0005886|GO:0030246|GO:0005654|GO:0006488|GO:0006048|GO:0044267|GO:0043687|GO:0018279|GO:0005829	162560221	chr1	162560162	+	hs|1q23.3	NM_003115	chr1:162560162-162560221	NM_003115	Hs.492859
A_33_P3237359	-6.23402	-2.64016	6.23402	down	HMGB3	high mobility group box 3	FALSE	Homo sapiens high mobility group box 3 (HMGB3), transcript variant 1, mRNA [NM_001301228]	3149	GO:0045578|GO:0006355|GO:0003690|GO:0045638|GO:0008301|GO:0005694|GO:0003682|GO:0007275|GO:0006338|GO:0006310|GO:0005634	150156632	chrX	150156573	+	hs|Xq28	NM_001301228	chrX:150156573-150156632	NM_001301228	Hs.19114
A_33_P3385062	-6.22423	-2.6379	6.22423	down	HAUS3	HAUS augmin-like complex, subunit 3	FALSE	HAUS augmin-like complex, subunit 3 [Source:HGNC Symbol;Acc:HGNC:28719] [ENST00000243706]	79441	GO:0051297|GO:0003674|GO:0007067|GO:0005813|GO:0005737|GO:0005874|GO:0005819|GO:0070652|GO:0051225|GO:0051301	2230469	chr4	2230410	-	hs|4p16.3	CR749640	chr4:2230469-2230410		Hs.665869
A_23_P431381	-6.2191	-2.63671	6.2191	down	C14orf80	chromosome 14 open reading frame 80	FALSE	Homo sapiens chromosome 14 open reading frame 80 (C14orf80), transcript variant 1, mRNA [NM_001134875]	283643		105965413	chr14	105965354	+	hs|14q32.33	NM_001134875	chr14:105965354-105965413	NM_001134875	Hs.720306
A_24_P256063	-6.19599	-2.63133	6.19599	down			FALSE	keratin 18 pseudogene 65 [Source:HGNC Symbol;Acc:HGNC:48892] [ENST00000439811]			112683207	chr6	112683148	-	hs|6q21		chr6:112683207-112683148
A_24_P230057	-6.19581	-2.63129	6.19581	down			FALSE	keratin 18 pseudogene 49 [Source:HGNC Symbol;Acc:HGNC:33419] [ENST00000427083]			106672412	chrX	106672353	+	hs|Xq22.3		chrX:106672353-106672412
A_23_P135061	-6.19158	-2.63031	6.19158	down	CORO2A	coronin, actin binding protein, 2A	FALSE	Homo sapiens coronin, actin binding protein, 2A (CORO2A), transcript variant 1, mRNA [NM_003389]	7464	GO:0035556|GO:0051015|GO:0030036|GO:0017053|GO:0015629	100886921	chr9	100886862	-	hs|9q22.33	NM_003389	chr9:100886921-100886862	NM_003389	Hs.113094
A_23_P11862	-6.17899	-2.62737	6.17899	down	C1orf112	chromosome 1 open reading frame 112	FALSE	Homo sapiens chromosome 1 open reading frame 112 (C1orf112), mRNA [NM_018186]	55732		169822169	chr1	169822110	+	hs|1q24.2	NM_018186	chr1:169822110-169822169	NM_018186	Hs.443551
A_24_P38081	-6.1723	-2.62581	6.1723	down	FKBP5	FK506 binding protein 5	FALSE	Homo sapiens FK506 binding protein 5 (FKBP5), transcript variant 1, mRNA [NM_004117]	2289	GO:0005515|GO:0000413|GO:0061077|GO:0016020|GO:0006457|GO:0031072|GO:0005789|GO:0003755|GO:0005528|GO:0005654|GO:0070062	35541987	chr6	35541928	-	hs|6p21.31	NM_004117	chr6:35541987-35541928	NM_004117	Hs.407190
A_33_P3242124	-6.17126	-2.62556	6.17126	down	HAUS8	HAUS augmin-like complex, subunit 8	FALSE	Homo sapiens HAUS augmin-like complex, subunit 8 (HAUS8), transcript variant 1, mRNA [NM_033417]	93323	GO:0051297|GO:0003674|GO:0007067|GO:0005813|GO:0005737|GO:0000922|GO:0005874|GO:0070652|GO:0051225|GO:0051301	17169471	chr19	17169412	-	hs|19p13.11	NM_033417	chr19:17169471-17169412	NM_033417	Hs.404088
A_32_P151800	-6.14695	-2.61987	6.14695	down	FAM72D	family with sequence similarity 72, member D	FALSE	Homo sapiens family with sequence similarity 72, member D (FAM72D), mRNA [NM_207418]	728833		143897200	chr1	143897141	-	hs|1q21.1	NM_207418	chr1:143897200-143897141	NM_207418	Hs.535577
A_23_P96641	-6.13765	-2.61769	6.13765	down	PRPS2	phosphoribosyl pyrophosphate synthetase 2	FALSE	Homo sapiens phosphoribosyl pyrophosphate synthetase 2 (PRPS2), transcript variant 1, mRNA [NM_001039091]	5634	GO:0000287|GO:0016208|GO:0031100|GO:0005524|GO:0042803|GO:0016310|GO:0006139|GO:0006167|GO:0043531|GO:0016301|GO:0004749|GO:0006015|GO:0030246|GO:0002189|GO:0019003|GO:0070062	12841302	chrX	12841243	+	hs|Xp22.2	NM_001039091	chrX:12841243-12841302	NM_001039091	Hs.654581
A_23_P160537	-6.13726	-2.61759	6.13726	down	AUNIP	aurora kinase A and ninein interacting protein	FALSE	Homo sapiens aurora kinase A and ninein interacting protein (AUNIP), transcript variant 2, mRNA [NM_024037]	79000	GO:0005515|GO:0005813|GO:0005737|GO:0000922|GO:0007051	26160615	chr1	26160556	-	hs|1p36.11	NM_024037	chr1:26160615-26160556	NM_024037	Hs.725400
A_23_P320829	-6.11627	-2.61265	6.11627	down	CEP128	centrosomal protein 128kDa	FALSE	Homo sapiens centrosomal protein 128kDa (CEP128), mRNA [NM_152446]	145508	GO:0005737|GO:0000922|GO:0005815|GO:0005814	81371162	chr14	81366320	-	hs|14q31.1	NM_152446	chr14:81371162-81366320	NM_152446	Hs.162889
A_33_P3292540	-6.11524	-2.61241	6.11524	down	CDKN2C	cyclin-dependent kinase inhibitor 2C (p18, inhibits CDK4)	FALSE	Homo sapiens cyclin-dependent kinase inhibitor 2C (p18, inhibits CDK4) (CDKN2C), transcript variant 2, mRNA [NM_078626]	1031	GO:0005515|GO:0030308|GO:0008285|GO:0019901|GO:0071901|GO:0048709|GO:0005634|GO:0000079|GO:0005829|GO:0042326|GO:0000082|GO:0005737|GO:0004861|GO:0007050|GO:0000278	51440022	chr1	51439963	+	hs|1p32.3	NM_078626	chr1:51439963-51440022	NM_078626	Hs.525324
A_24_P401601	-6.10149	-2.60916	6.10149	down			FALSE	keratin 18 pseudogene 40 [Source:HGNC Symbol;Acc:HGNC:33409] [ENST00000599859]			21145465	chr19	21145404	+	hs|19p12		chr19:21145404-21145465
A_33_P3378334	-6.08427	-2.60508	6.08427	down	SMC2	structural maintenance of chromosomes 2	FALSE	Homo sapiens structural maintenance of chromosomes 2 (SMC2), transcript variant 1, mRNA [NM_001042550]	10592	GO:0000796|GO:0005515|GO:0000793|GO:0007076|GO:0010032|GO:0046982|GO:0005634|GO:0051383|GO:0000228|GO:0005524|GO:0005829|GO:0005737|GO:0045132|GO:0005654|GO:0000278|GO:0070062|GO:0051301	106896855	chr9	106896796	+	hs|9q31.1	NM_001042550	chr9:106896796-106896855	NM_001042550	Hs.119023
A_33_P3215239	-6.08283	-2.60474	6.08283	down	KIF20B	kinesin family member 20B	FALSE	Homo sapiens kinesin family member 20B (KIF20B), transcript variant 1, mRNA [NM_001284259]	9585	GO:0008017|GO:0005813|GO:0007088|GO:0050699|GO:2001222|GO:0005874|GO:2000114|GO:0005730|GO:0005819|GO:0001843|GO:0003777|GO:0005524|GO:0005737|GO:0007067|GO:0070201|GO:0008152|GO:0005654|GO:0007050|GO:0016887|GO:0051301|GO:0007018	91522588	chr10	91522529	+	hs|10q23.31	NM_001284259	chr10:91522529-91522588	NM_001284259	Hs.240
A_24_P99090	-6.06985	-2.60166	6.06985	down	CKAP2	cytoskeleton associated protein 2	FALSE	Homo sapiens cytoskeleton associated protein 2 (CKAP2), transcript variant 1, mRNA [NM_018204]	26586	GO:0005881|GO:0005813|GO:0005737|GO:0000922|GO:0000281|GO:0045944|GO:0015630|GO:0007026|GO:0006915	53035922	chr13	53035863	+	hs|13q14.3	NM_018204	chr13:53035863-53035922	NM_018204	Hs.444028
A_33_P3343250	-6.06365	-2.60019	6.06365	down	GPR1	G protein-coupled receptor 1	FALSE	Homo sapiens G protein-coupled receptor 1 (GPR1), transcript variant 4, mRNA [NM_001261453]	2825	GO:0043005|GO:0042923|GO:0007186|GO:0007218|GO:0007187|GO:0005887|GO:0004930|GO:0007268	207040103	chr2	207040044	-	hs|2q33.3	NM_001261453	chr2:207040103-207040044	NM_001261453	Hs.184907
A_23_P349416	-6.02173	-2.59018	6.02173	down	ERBB3	erb-b2 receptor tyrosine kinase 3	FALSE	Homo sapiens v-erb-b2 avian erythroblastic leukemia viral oncogene homolog 3 (ERBB3), transcript variant 1, mRNA [NM_001982]	2065	GO:0005515|GO:0005886|GO:0061098|GO:0051048|GO:0051402|GO:0005615|GO:0042803|GO:0042802|GO:0007507|GO:0014037|GO:0016323|GO:0043524|GO:0016324|GO:0030296|GO:0007173|GO:0019838|GO:0042127|GO:0009968|GO:0048011|GO:0046982|GO:0003197|GO:0048015|GO:0021545|GO:0014068|GO:0005524|GO:0014065|GO:0016328|GO:0097192|GO:0043235|GO:0007165|GO:0007162|GO:0005887|GO:0008543|GO:0045087|GO:0042060|GO:0007422|GO:…	56496219	chr12	56496160	+	hs|12q13.2	NM_001982	chr12:56496160-56496219	NM_001982	Hs.118681
A_33_P3221284	-6.01127	-2.58767	6.01127	down	CCDC80	coiled-coil domain containing 80	FALSE	Homo sapiens coiled-coil domain containing 80 (CCDC80), transcript variant 1, mRNA [NM_199511]	151887	GO:0030198|GO:0010811|GO:0005614|GO:0001968|GO:0008201|GO:0005604	112359260	chr3	112359201	-	hs|3q13.2	NM_199511	chr3:112359260-112359201	NM_199511	Hs.477128
A_33_P3280796	-5.97934	-2.57999	5.97934	down	LMO7	LIM domain 7	FALSE	PREDICTED: Homo sapiens LIM domain 7 (LMO7), transcript variant X22, mRNA [XM_005266396]	4008	GO:0005737|GO:0004842|GO:0016567|GO:0023051|GO:0000151|GO:0008270|GO:0005634|GO:0030155|GO:0005925	76210624	chr13	76210565	+	hs|13q22.2	XM_005266396	chr13:76210565-76210624	XM_005266396	Hs.207631
A_33_P3256810	-5.97562	-2.57909	5.97562	down	TM4SF4	transmembrane 4 L six family member 4	FALSE	Homo sapiens transmembrane 4 L six family member 4 (TM4SF4), mRNA [NM_004617]	7104	GO:0016021|GO:0042246	149216647	chr3	149216588	+	hs|3q25.1	NM_004617	chr3:149216588-149216647	NM_004617	Hs.133527
A_23_P67771	-5.96441	-2.57638	5.96441	down	BARD1	BRCA1 associated RING domain 1	FALSE	Homo sapiens BRCA1 associated RING domain 1 (BARD1), transcript variant 1, mRNA [NM_000465]	580	GO:0005515|GO:0004842|GO:0045732|GO:0016567|GO:0003723|GO:0016874|GO:0000151|GO:0005634|GO:0042803|GO:0043231|GO:0070531|GO:0046826|GO:0005737|GO:0001894|GO:0007050|GO:0019900|GO:0085020|GO:0043066|GO:0043065|GO:0046982|GO:0005730|GO:0031436|GO:0006974|GO:0042325|GO:0006281|GO:0008270|GO:0005654|GO:0031441	215593719	chr2	215593660	-	hs|2q35	NM_000465	chr2:215593719-215593660	NM_000465	Hs.591642
A_33_P3413523	-5.94418	-2.57148	5.94418	down	DBF4	DBF4 zinc finger	FALSE	Homo sapiens DBF4 zinc finger (DBF4), mRNA [NM_006716]	10926	GO:0006260|GO:0000082|GO:0008270|GO:0005654|GO:0043085|GO:0008047|GO:0003676|GO:0000278	87516712	chr7	87516653	+	hs|7q21.12	NM_006716	chr7:87516653-87516712	NM_006716	Hs.485380
A_33_P3236813	-5.935	-2.56925	5.935	down	GPR19	G protein-coupled receptor 19	FALSE	Homo sapiens G protein-coupled receptor 19 (GPR19), mRNA [NM_006143]	2842	GO:0007186|GO:0005887|GO:0004930	12814162	chr12	12814103	-	hs|12p13.1	NM_006143	chr12:12814162-12814103	NM_006143	Hs.657862
A_24_P254705	-5.93356	-2.5689	5.93356	down	ZNF695	zinc finger protein 695	FALSE	Homo sapiens zinc finger protein 695 (ZNF695), transcript variant 1, mRNA [NM_020394]	57116	GO:0006355|GO:0005634|GO:0003676|GO:0046872	247163255	chr1	247162725	-	hs|1q44	NM_020394	chr1:247163255-247162725	NM_020394	Hs.669893
A_23_P115482	-5.93166	-2.56844	5.93166	down	UBE2T	ubiquitin-conjugating enzyme E2T	FALSE	Homo sapiens ubiquitin-conjugating enzyme E2T (UBE2T), mRNA [NM_014176]	29089	GO:0035519|GO:0085020|GO:0004842|GO:0006513|GO:0016874|GO:0005634|GO:0044314|GO:0005524|GO:0006974|GO:0051865|GO:0070534|GO:0005737|GO:0006281|GO:0070979|GO:0019787|GO:0003682|GO:0005654|GO:0070936|GO:0031625	202300965	chr1	202300906	-	hs|1q32.1	NM_014176	chr1:202300965-202300906	NM_014176	Hs.5199
A_33_P3247022	-5.92502	-2.56682	5.92502	down	CCNE2	cyclin E2	FALSE	Homo sapiens cyclin E2 (CCNE2), mRNA [NM_057749]	9134	GO:0005515|GO:0000082|GO:0006270|GO:0000075|GO:0016538|GO:0005654|GO:0000079|GO:0000278|GO:0051301|GO:0005829	95892677	chr8	95892618	-	hs|8q22.1	NM_057749	chr8:95892677-95892618	NM_057749	Hs.521693
A_23_P303101	-5.92322	-2.56638	5.92322	down	PCDHGC4	protocadherin gamma subfamily C, 4	FALSE	Homo sapiens protocadherin gamma subfamily C, 4 (PCDHGC4), transcript variant 2, mRNA [NM_032406]	56098	GO:0005886|GO:0005509|GO:0016021|GO:0007156	140867345	chr5	140867286	+	hs|5q31.3	NM_032406	chr5:140867286-140867345	NM_032406	Hs.368160
A_19_P00806946	-5.91747	-2.56498	5.91747	down			FALSE	ALU7_HUMAN (P39194) Alu subfamily SQ sequence contamination warning entry, partial (24%) [THC2658846]			173764934	chr1	173764875	-	hs|1q25.1		chr1:173764934-173764875
A_32_P107644	-5.91518	-2.56442	5.91518	down			FALSE	MIR137 host gene (non-protein coding) [Source:HGNC Symbol;Acc:HGNC:42871] [ENST00000413670]			98509003	chr1	98508944	-	hs|1p21.3	AK092728	chr1:98509003-98508944		Hs.451802
A_33_P3379454	-5.907	-2.56243	5.907	down	UHRF1	ubiquitin-like with PHD and ring finger domains 1	FALSE	Homo sapiens ubiquitin-like with PHD and ring finger domains 1 (UHRF1), transcript variant 3, mRNA [NM_001290050]	29128	GO:2000373|GO:0005515|GO:0000987|GO:0000792|GO:0010467|GO:0004842|GO:0000790|GO:0008327|GO:0003700|GO:0000791|GO:0008283|GO:0005657|GO:0016874|GO:0005634|GO:0035064|GO:0016363|GO:0042802|GO:0042393|GO:0010216|GO:0042787|GO:0045944|GO:0016574|GO:0000122|GO:0031493|GO:0006351|GO:0051865|GO:0032776|GO:0032270|GO:0007049|GO:0006281|GO:0040029|GO:0008270|GO:0010390	4960954	chr19	4960895	+	hs|19p13.3	NM_001290050	chr19:4960895-4960954	NM_001290050	Hs.108106
A_33_P3222630	-5.89604	-2.55975	5.89604	down	FBXO43	F-box protein 43	FALSE	Homo sapiens F-box protein 43 (FBXO43), transcript variant 2, mRNA [NM_001029860]	286151	GO:0051321|GO:0016567|GO:0042177|GO:0008270|GO:0005634|GO:0045835	101146035	chr8	101145976	-	hs|8q22.2	NM_001029860	chr8:101146035-101145976	NM_001029860	Hs.339577
A_23_P21436	-5.89592	-2.55972	5.89592	down	PHF19	PHD finger protein 19	FALSE	Homo sapiens PHD finger protein 19 (PHF19), transcript variant 1, mRNA [NM_015651]	26147	GO:0005515|GO:0010467|GO:0006355|GO:0035098|GO:0061087|GO:0045814|GO:0040029|GO:0008270|GO:0005654|GO:0035064|GO:0006351|GO:0016568	123618304	chr9	123618245	-	hs|9q33.2	NM_015651	chr9:123618304-123618245	NM_015651	Hs.460124
A_32_P162374	-5.87324	-2.55416	5.87324	down	C18orf54	chromosome 18 open reading frame 54	FALSE	Homo sapiens chromosome 18 open reading frame 54 (C18orf54), transcript variant 3, mRNA [NM_173529]	162681	GO:0005576	51907544	chr18	51907485	+	hs|18q21.2	NM_173529	chr18:51907485-51907544	NM_173529	Hs.208701
A_33_P3401621	-5.86279	-2.55159	5.86279	down	CCNB1	cyclin B1	FALSE	Homo sapiens cyclin B1 (CCNB1), mRNA [NM_031966]	891	GO:0007077|GO:0005515|GO:0060045|GO:0046680|GO:0090266|GO:0007283|GO:0001556|GO:0005113|GO:0071398|GO:0005813|GO:0071283|GO:0019901|GO:0001701|GO:0000922|GO:0035173|GO:0045931|GO:0055015|GO:0005654|GO:0007080|GO:0000278|GO:0031442|GO:0051301|GO:0043148|GO:0005634|GO:0000079|GO:0048146|GO:0042246|GO:0031145|GO:0005829|GO:0005737|GO:0000082|GO:0000086|GO:0051726|GO:2000775|GO:0060623|GO:0051987|GO:…	68473931	chr5	68473872	+	hs|5q13.2	NM_031966	chr5:68473872-68473931	NM_031966	Hs.23960
A_23_P25019	-5.85464	-2.54958	5.85464	down	PRIM1	primase, DNA, polypeptide 1 (49kDa)	FALSE	Homo sapiens primase, DNA, polypeptide 1 (49kDa) (PRIM1), mRNA [NM_000946]	5557	GO:0006271|GO:0000082|GO:0016020|GO:0000723|GO:0006270|GO:0003896|GO:0000722|GO:0006269|GO:0005654|GO:0000278|GO:0046872|GO:0032201	57133111	chr12	57132284	-	hs|12q13.3	NM_000946	chr12:57133111-57132284	NM_000946	Hs.534339
A_33_P3261640	-5.84697	-2.54769	5.84697	down			FALSE				98201033	chr2	98200974	-	hs|2q11.2		chr2:098201033-098200974
A_23_P14193	-5.81932	-2.54085	5.81932	down	RFC3	replication factor C (activator 1) 3, 38kDa	FALSE	Homo sapiens replication factor C (activator 1) 3, 38kDa (RFC3), transcript variant 1, mRNA [NM_002915]	5983	GO:0046683|GO:0005515|GO:0003689|GO:0005634|GO:0003677|GO:0006260|GO:0006271|GO:0006281|GO:0000723|GO:0006283|GO:0000722|GO:0000731|GO:0006297|GO:0005654|GO:0005663|GO:0006289|GO:0000278|GO:0016887|GO:0032201	34410747	chr13	34410688	+	hs|13q13.2	NM_002915	chr13:34410688-34410747	NM_002915	Hs.115474
A_23_P44684	-5.81441	-2.53963	5.81441	down	ECT2	epithelial cell transforming 2	FALSE	Homo sapiens epithelial cell transforming 2 (ECT2), transcript variant 3, mRNA [NM_018098]	1894	GO:0045859|GO:0005515|GO:0072686|GO:0070301|GO:0007264|GO:0005634|GO:0015031|GO:0032154|GO:0042803|GO:0043231|GO:0005829|GO:0032147|GO:0000910|GO:0005737|GO:0070830|GO:0005911|GO:0043089|GO:0071277|GO:0051260|GO:0004871|GO:0043123|GO:0005089|GO:0051056|GO:0048011|GO:0031965|GO:0043065|GO:0051988|GO:0032467|GO:0030496|GO:0032862|GO:0032863|GO:0097190|GO:0071479|GO:0000902|GO:0045666|GO:0032321|GO:…	172538389	chr3	172538330	+	hs|3q26.31	NM_018098	chr3:172538330-172538389	NM_018098	Hs.518299
A_23_P110802	-5.80365	-2.53696	5.80365	down	CENPH	centromere protein H	FALSE	Homo sapiens centromere protein H (CENPH), mRNA [NM_022909]	64946	GO:0034080|GO:0005515|GO:0051382|GO:0006334|GO:0000777|GO:0000776|GO:0043515|GO:0005654|GO:0005634|GO:0051383|GO:0000278|GO:0005829	68505708	chr5	68505649	+	hs|5q13.2	NM_022909	chr5:68505649-68505708	NM_022909	Hs.631967
A_33_P3393689	-5.80359	-2.53695	5.80359	down			FALSE
A_33_P3361147	-5.79228	-2.53413	5.79228	down			FALSE	MIR4435-1 host gene (non-protein coding) [Source:HGNC Symbol;Acc:HGNC:35163] [ENST00000371162]			111995399	chr2	111995340	-	hs|2q13	AK130707	chr2:111995399-111995340		Hs.652426
A_23_P156310	-5.78186	-2.53153	5.78186	down	SKP2	S-phase kinase-associated protein 2, E3 ubiquitin protein ligase	FALSE	Homo sapiens S-phase kinase-associated protein 2, E3 ubiquitin protein ligase (SKP2), transcript variant 2, mRNA [NM_032637]	6502	GO:0000209|GO:0005515|GO:0004842|GO:0071460|GO:0016235|GO:0008283|GO:0005730|GO:0005634|GO:0048661|GO:0031145|GO:0042802|GO:0005829|GO:0000082|GO:0005737|GO:0000086|GO:0051726|GO:0033148|GO:0005654|GO:0000278|GO:0019005	36170531	chr5	36170472	+	hs|5p13.2	NM_032637	chr5:36170472-36170531	NM_032637	Hs.23348
A_23_P357794	-5.75967	-2.52599	5.75967	down	MTBP	MDM2 binding protein	FALSE	Homo sapiens MDM2 binding protein (MTBP), mRNA [NM_022045]	27085	GO:0045839|GO:0008285|GO:0034501|GO:0000776|GO:0007050|GO:0007089|GO:0000785	121535571	chr8	121534934	+	hs|8q24.12	NM_022045	chr8:121534934-121535571	NM_022045	Hs.657656
A_23_P44942	-5.75752	-2.52545	5.75752	down	CCDC15	coiled-coil domain containing 15	FALSE	Homo sapiens coiled-coil domain containing 15 (CCDC15), mRNA [NM_025004]	80071	GO:0005813	124910584	chr11	124910525	+	hs|11q24.2	NM_025004	chr11:124910525-124910584	NM_025004	Hs.287555
A_23_P302654	-5.75697	-2.52531	5.75697	down	CEP72	centrosomal protein 72kDa	FALSE	Homo sapiens centrosomal protein 72kDa (CEP72), mRNA [NM_018140]	55722	GO:0005515|GO:0005813|GO:0006996|GO:0000086|GO:0007051|GO:0000278|GO:0033566|GO:0042802|GO:0005829	653382	chr5	653323	+	hs|5p15.33	NM_018140	chr5:653323-653382	NM_018140	Hs.591741
A_23_P94412	-5.74935	-2.5234	5.74935	down	PDCD1LG2	programmed cell death 1 ligand 2	FALSE	Homo sapiens programmed cell death 1 ligand 2 (PDCD1LG2), mRNA [NM_025239]	80380	GO:0003674|GO:0006955|GO:0005886|GO:0032693|GO:0046007|GO:0042102|GO:0031295|GO:0016021|GO:0032689|GO:0070062|GO:0012505	5557628	chr9	5549556	+	hs|9p24.1	NM_025239	chr9:5549556-5557628	NM_025239	Hs.532279
A_24_P106624	-5.72791	-2.51801	5.72791	down	MEOX2	mesenchyme homeobox 2	FALSE	Homo sapiens mesenchyme homeobox 2 (MEOX2), mRNA [NM_005924]	4223	GO:0005515|GO:0003700|GO:0001757|GO:0008015|GO:0001205|GO:0005634|GO:0007275|GO:0001525|GO:0000978|GO:0006351|GO:0043565|GO:0001077|GO:0005737|GO:0016607|GO:0007519|GO:0070997|GO:0045944|GO:0060021|GO:0060173|GO:0000980	15651278	chr7	15651219	-	hs|7p21.2	NM_005924	chr7:15651278-15651219	NM_005924	Hs.170355
A_24_P58529	-5.72135	-2.51635	5.72135	down	TUBA1C	tubulin, alpha 1c	FALSE	Homo sapiens tubulin, alpha 1c (TUBA1C), transcript variant 5, mRNA [NM_032704]	84790	GO:0005515|GO:0005881|GO:0051258|GO:0005874|GO:0003924|GO:0005634|GO:0005525|GO:0031982|GO:0006184|GO:0030705|GO:0005198|GO:0006457|GO:0005200|GO:0051084|GO:0007017|GO:0044267|GO:0051301	49666344	chr12	49666285	+	hs|12q13.12	NM_032704	chr12:49666285-49666344	NM_032704	Hs.652390
A_33_P3398862	-5.71931	-2.51584	5.71931	down	RHOB	ras homolog family member B	FALSE	ras homolog family member B [Source:HGNC Symbol;Acc:HGNC:668] [ENST00000272233]	388	GO:0005515|GO:0070301|GO:0005886|GO:0007264|GO:0006927|GO:0003924|GO:0005634|GO:0007266|GO:0006886|GO:0032154|GO:0005829|GO:0000910|GO:0007411|GO:0007155|GO:0070062|GO:0051056|GO:0043065|GO:0008333|GO:0006915|GO:0030168|GO:0001525|GO:0045786|GO:0005525|GO:0071479|GO:0045766|GO:0007596|GO:0008152|GO:0031902|GO:0019003|GO:0005925|GO:0005769|GO:0010008	20648643	chr2	20648584	+	hs|2p24.1	AK309991	chr2:20648584-20648643		Hs.502876
A_23_P95302	-5.71817	-2.51555	5.71817	down	RFC5	replication factor C (activator 1) 5, 36.5kDa	FALSE	Homo sapiens replication factor C (activator 1) 5, 36.5kDa (RFC5), transcript variant 2, mRNA [NM_181578]	5985	GO:0005515|GO:0003689|GO:0005634|GO:0005524|GO:0006260|GO:0006261|GO:0006271|GO:0006281|GO:0000723|GO:0006283|GO:0000722|GO:0006297|GO:0005654|GO:0005663|GO:0006289|GO:0019899|GO:0000278|GO:0032201	118469833	chr12	118469774	+	hs|12q24.23	NM_181578	chr12:118469774-118469833	NM_181578	Hs.731908
A_19_P00813560	-5.71625	-2.51507	5.71625	down			FALSE				11763630	chr19	11763571	+	hs|19p13.2		chr19:11763571-11763630
A_32_P4199	-5.70863	-2.51314	5.70863	down	RNF152	ring finger protein 152	FALSE	Homo sapiens ring finger protein 152 (RNF152), mRNA [NM_173557]	220441	GO:0004842|GO:0016874|GO:0006915|GO:0008270|GO:0016021|GO:0070936|GO:0005765|GO:0005764	59482758	chr18	59482699	-	hs|18q21.33	NM_173557	chr18:59482758-59482699	NM_173557	Hs.667457
A_23_P151405	-5.69344	-2.5093	5.69344	down	CKAP2	cytoskeleton associated protein 2	FALSE	Homo sapiens cytoskeleton associated protein 2 (CKAP2), transcript variant 1, mRNA [NM_018204]	26586	GO:0005881|GO:0005813|GO:0005737|GO:0000922|GO:0000281|GO:0045944|GO:0015630|GO:0007026|GO:0006915	53050453	chr13	53050394	+	hs|13q14.3	NM_018204	chr13:53050394-53050453	NM_018204	Hs.444028
A_23_P132277	-5.69275	-2.50913	5.69275	down	MCM5	minichromosome maintenance complex component 5	FALSE	Homo sapiens minichromosome maintenance complex component 5 (MCM5), mRNA [NM_006739]	4174	GO:0005515|GO:0042555|GO:0005634|GO:0003677|GO:0005524|GO:0003678|GO:0006260|GO:0000082|GO:0006271|GO:0016020|GO:0006270|GO:0005654|GO:0032508|GO:0000278	35820178	chr22	35819307	+	hs|22q12.3	NM_006739	chr22:35819307-35820178	NM_006739	Hs.517582
A_23_P401904	-5.67239	-2.50396	5.67239	down	PHF19	PHD finger protein 19	FALSE	Homo sapiens PHD finger protein 19 (PHF19), transcript variant 2, mRNA [NM_001009936]	26147	GO:0005515|GO:0010467|GO:0006355|GO:0035098|GO:0061087|GO:0045814|GO:0040029|GO:0008270|GO:0005654|GO:0035064|GO:0006351|GO:0016568	123632058	chr9	123631999	-	hs|9q33.2	NM_001009936	chr9:123632058-123631999	NM_001009936	Hs.460124
A_23_P121222	-5.64009	-2.49572	5.64009	down	RAD18	RAD18 E3 ubiquitin protein ligase	FALSE	Homo sapiens RAD18 E3 ubiquitin protein ligase (RAD18), mRNA [NM_020165]	56852	GO:0001741|GO:0005515|GO:0016567|GO:0005657|GO:0016874|GO:0000403|GO:0005634|GO:0007283|GO:0003684|GO:0006281|GO:0008270|GO:0000785|GO:0009411|GO:0045910|GO:0031625|GO:0031593	8921693	chr3	8921634	-	hs|3p25.3	NM_020165	chr3:8921693-8921634	NM_020165	Hs.375684
A_33_P3317523	-5.63091	-2.49337	5.63091	down	STMN1	stathmin 1	FALSE	Homo sapiens stathmin 1 (STMN1), transcript variant 1, mRNA [NM_203401]	3925	GO:0043005|GO:0031115|GO:0005874|GO:0007409|GO:0009615|GO:0031175|GO:0005829|GO:0035556|GO:0005622|GO:0007165|GO:0005737|GO:0051493|GO:0015631|GO:0016020|GO:0007420|GO:0004871|GO:0007052|GO:0051272|GO:0007019|GO:0070062	26227291	chr1	26227232	-	hs|1p36.11	NM_203401	chr1:26227291-26227232	NM_203401	Hs.209983
A_23_P312863	-5.60994	-2.48799	5.60994	down	TUBB4B	tubulin, beta 4B class IVb	FALSE	Homo sapiens tubulin, beta 4B class IVb (TUBB4B), mRNA [NM_006088]	10383	GO:0003725|GO:0051258|GO:0042288|GO:0006996|GO:0042267|GO:0005874|GO:0003924|GO:0006928|GO:0005634|GO:0005525|GO:0055085|GO:0051225|GO:0031982|GO:0005829|GO:0006184|GO:0006457|GO:0000086|GO:0005200|GO:0051084|GO:0051082|GO:0000278|GO:0005856|GO:0044267|GO:0070062	140137705	chr9	140137646	+	hs|9q34.3	NM_006088	chr9:140137646-140137705	NM_006088	Hs.433615
A_24_P158089	-5.59309	-2.48365	5.59309	down	SERPINE1	serpin peptidase inhibitor, clade E (nexin, plasminogen activator inhibitor type 1), member 1	FALSE	Homo sapiens serpin peptidase inhibitor, clade E (nexin, plasminogen activator inhibitor type 1), member 1 (SERPINE1), mRNA [NM_000602]	5054	GO:0033629|GO:0005515|GO:0010467|GO:0035491|GO:0006367|GO:0010469|GO:0005886|GO:0004867|GO:2000098|GO:0002020|GO:0005615|GO:0032757|GO:0014912|GO:0061044|GO:0061045|GO:0030198|GO:0045944|GO:0042127|GO:0031093|GO:0007179|GO:0070062|GO:0030336|GO:0005102|GO:0051918|GO:0030168|GO:0005576|GO:0001525|GO:0045766|GO:0006351|GO:0031012|GO:0010951|GO:0050829|GO:0071222|GO:0007596|GO:0030194|GO:0030195|GO:…	100781614	chr7	100781555	+	hs|7q22.1	NM_000602	chr7:100781555-100781614	NM_000602	Hs.414795
A_24_P142118	-5.57706	-2.47951	5.57706	down	THBS1	thrombospondin 1	FALSE	Homo sapiens thrombospondin 1 (THBS1), mRNA [NM_003246]	7057	GO:0005515|GO:0006986|GO:0034976|GO:0003417|GO:0005615|GO:0032914|GO:0034605|GO:0001948|GO:0010763|GO:0006493|GO:0030198|GO:0032026|GO:0030335|GO:0009986|GO:0017134|GO:0005509|GO:0030169|GO:0030168|GO:0010748|GO:0010595|GO:0010751|GO:0010596|GO:0005178|GO:0010754|GO:0032570|GO:0001786|GO:0010759|GO:0005788|GO:0010757|GO:0009897|GO:0001953|GO:0005783|GO:0010811|GO:0002040|GO:0036066|GO:0000187|GO:…	39888890	chr15	39888831	+	hs|15q14	NM_003246	chr15:39888831-39888890	NM_003246	Hs.164226
A_23_P58676	-5.57233	-2.47828	5.57233	down	NPR3	natriuretic peptide receptor 3	FALSE	Homo sapiens natriuretic peptide receptor 3 (NPR3), transcript variant 1, mRNA [NM_001204375]	4883	GO:0033688|GO:0048015|GO:0042562|GO:0007200|GO:0008528|GO:0048662|GO:0030157|GO:0007194|GO:0007193|GO:0042803|GO:0001501|GO:0016941|GO:0051000|GO:0005887|GO:0008217|GO:0002158|GO:0017046|GO:0035810|GO:0070062	32791776	chr5	32791717	+	hs|5p13.3	NM_001204375	chr5:32791717-32791776	NM_001204375	Hs.13528
A_32_P148476	-5.57043	-2.47779	5.57043	down			FALSE				25664334	chrX	25664275	-	hs|Xp21.3		chrX:25664334-25664275
A_33_P3861385	-5.56256	-2.47575	5.56256	down	lnc-FOXD4L6-3	lnc-FOXD4L6-3:1	FALSE	Homo sapiens cDNA FLJ38840 fis, clone MESAN2003490. [AK096159]			69082606	chr9	69082547	-	hs|9q21.11		chr9:69082606-69082547		Hs.650460
A_24_P358131	-5.56137	-2.47544	5.56137	down			FALSE	keratin 18 pseudogene 52 [Source:HGNC Symbol;Acc:HGNC:37888] [ENST00000404956]			32047698	chr2	32047660	-	hs|2p23.1		chr2:32047698-32047660
A_19_P00812385	-5.54387	-2.47089	5.54387	down			FALSE				35785120	chr7	35785061	+	hs|7p14.2		chr7:035785061-035785120
A_23_P99452	-5.54094	-2.47013	5.54094	down	BRCA2	breast cancer 2, early onset	FALSE	Homo sapiens breast cancer 2, early onset (BRCA2), mRNA [NM_000059]	675	GO:0005515|GO:0010165|GO:0048478|GO:0001833|GO:0005634|GO:0001556|GO:0007283|GO:0002020|GO:0033593|GO:0006302|GO:0000910|GO:0005737|GO:0003697|GO:0000724|GO:0010485|GO:0030141|GO:0006978|GO:0010332|GO:0004402|GO:0030097|GO:0005813|GO:0032465|GO:0043015|GO:0007569|GO:0010484|GO:0051298|GO:0043234|GO:0042771|GO:0008585|GO:0045931|GO:0010225|GO:0006281|GO:0043966|GO:0043967|GO:0007420|GO:0005654|GO:…	32973055	chr13	32972996	+	hs|13q13.1	NM_000059	chr13:32972996-32973055	NM_000059	Hs.34012
A_24_P303454	-5.53544	-2.4687	5.53544	down	TIAM2	T-cell lymphoma invasion and metastasis 2	FALSE	Homo sapiens T-cell lymphoma invasion and metastasis 2 (TIAM2), transcript variant 1, mRNA [NM_012454]	26230	GO:0051056|GO:0048011|GO:0043065|GO:0007264|GO:0044281|GO:0030175|GO:0097190|GO:0030027|GO:0005829|GO:0030426|GO:0005085|GO:0016020|GO:0032321|GO:0005057|GO:0005089|GO:0044255|GO:0070062|GO:0005096	155578233	chr6	155578174	+	hs|6q25.3	NM_012454	chr6:155578174-155578233	NM_012454	Hs.586279
A_23_P167812	-5.52917	-2.46706	5.52917	down	RBM24	RNA binding motif protein 24	FALSE	Homo sapiens RNA binding motif protein 24 (RBM24), transcript variant 2, mRNA [NM_153020]	221662	GO:0043488|GO:0005737|GO:0000166|GO:0010830|GO:0005634|GO:0003730|GO:0030154	17293790	chr6	17293731	+	hs|6p22.3	NM_153020	chr6:17293731-17293790	NM_153020	Hs.519904
A_33_P3296582	-5.51955	-2.46455	5.51955	down	ARSJ	arylsulfatase family, member J	FALSE	Homo sapiens arylsulfatase family, member J (ARSJ), mRNA [NM_024590]	79642	GO:0006665|GO:0006687|GO:0005788|GO:0005576|GO:0004065|GO:0044281|GO:0044267|GO:0046872|GO:0043687	114821697	chr4	114821638	-	hs|4q26	NM_024590	chr4:114821697-114821638	NM_024590	Hs.22895
A_33_P3423445	-5.5026	-2.46011	5.5026	down	ZNF730	zinc finger protein 730	FALSE	PREDICTED: Homo sapiens zinc finger protein 730 (ZNF730), transcript variant X1, mRNA [XM_006722596]	100129543	GO:0006355|GO:0005634|GO:0003677|GO:0046872|GO:0006351	23332717	chr19	23332658	+	hs|19p12	XM_006722596	chr19:23332658-23332717	XM_006722596	Hs.427120
A_33_P3387831	-5.47945	-2.45403	5.47945	down	CENPM	centromere protein M	FALSE	centromere protein M [Source:HGNC Symbol;Acc:HGNC:18352] [ENST00000402338]	79019	GO:0034080|GO:0006334|GO:0000777|GO:0005654|GO:0000278|GO:0005829	42334819	chr22	42334760	-	hs|22q13.2	XR_244383	chr22:42334819-42334760	XR_244383	Hs.208912
A_33_P3215611	-5.47863	-2.45381	5.47863	down			FALSE				165878012	chr4	165877953	-	hs|4q32.3		chr4:165878012-165877953
A_33_P3328609	-5.47234	-2.45216	5.47234	down	PKP4	plakophilin 4	FALSE	Homo sapiens plakophilin 4 (PKP4), transcript variant 1, mRNA [NM_003628]	8502	GO:0005515|GO:0030057|GO:0072686|GO:0048471|GO:0005886|GO:0032467|GO:0044291|GO:0007267|GO:0030496|GO:0014069|GO:0051233|GO:0030155|GO:0000922|GO:0005737|GO:0016337|GO:0032321|GO:0005911|GO:0007043|GO:0009898|GO:0005856	159537124	chr2	159537064	+	hs|2q24.1	NM_003628	chr2:159537064-159537124	NM_003628	Hs.407580
A_33_P3244249	-5.45254	-2.44693	5.45254	down	SH3TC2	SH3 domain and tetratricopeptide repeats 2	FALSE	SH3 domain and tetratricopeptide repeats 2 [Source:HGNC Symbol;Acc:HGNC:29427] [ENST00000513604]	79628	GO:0005886|GO:0033157|GO:0031410|GO:0055037|GO:0032287	148405462	chr5	148405403	-	hs|5q32	AK127248	chr5:148405462-148405403
A_24_P411749	-5.44248	-2.44426	5.44248	down	GPR126	G protein-coupled receptor 126	FALSE	Homo sapiens G protein-coupled receptor 126 (GPR126), transcript variant a1, mRNA [NM_020455]	57211	GO:0007186|GO:0005886|GO:0004930|GO:0016021	142766962	chr6	142766903	+	hs|6q24.1	NM_020455	chr6:142766903-142766962	NM_020455	Hs.743302
A_23_P252335	-5.43415	-2.44205	5.43415	down	MIS18A	MIS18 kinetochore protein A	FALSE	Homo sapiens MIS18 kinetochore protein A (MIS18A), mRNA [NM_018944]	54069	GO:0005515|GO:0006334|GO:0005634|GO:0034080|GO:0003674|GO:0008150|GO:0005737|GO:0007067|GO:0007059|GO:0044030|GO:0005654|GO:0000775|GO:0051301	33641386	chr21	33641327	-	hs|21q22.11	NM_018944	chr21:33641386-33641327	NM_018944	Hs.190518
A_33_P3252196	-5.4333	-2.44183	5.4333	down	EZH2	enhancer of zeste 2 polycomb repressive complex 2 subunit	FALSE	Homo sapiens enhancer of zeste homolog 2 (Drosophila) (EZH2), transcript variant 1, mRNA [NM_004456]	2146	GO:0005515|GO:0010467|GO:0000790|GO:0070301|GO:0071902|GO:0021695|GO:0003723|GO:0006325|GO:0010718|GO:0005634|GO:0042054|GO:0005737|GO:0043406|GO:0042127|GO:0014013|GO:0051154|GO:0014834|GO:0034244|GO:0070734|GO:0006355|GO:2000134|GO:0001047|GO:0000122|GO:0003677|GO:0016279|GO:0070314|GO:0006351|GO:0031490|GO:0018024|GO:0043565|GO:0006306|GO:0045605|GO:0035098|GO:0032320|GO:0048387|GO:0045814|GO:…	148504564	chr7	148504505	-	hs|7q36.1	NM_004456	chr7:148504564-148504505	NM_004456	Hs.444082
A_23_P30799	-5.40625	-2.43463	5.40625	down	HIST1H3F	histone cluster 1, H3f	FALSE	Homo sapiens histone cluster 1, H3f (HIST1H3F), mRNA [NM_021018]	8968	GO:0005515|GO:0010467|GO:0046982|GO:0006325|GO:0006335|GO:0005576|GO:0005634|GO:0000228|GO:0003677|GO:0032776|GO:0043234|GO:0060968|GO:0016020|GO:0000183|GO:0007596|GO:0045814|GO:0040029|GO:0005654|GO:0000786|GO:0070062	26250647	chr6	26250588	-	hs|6p22.2	NM_021018	chr6:26250647-26250588	NM_021018	Hs.247814
A_33_P3376925	-5.40578	-2.4345	5.40578	down			FALSE				93574816	chrX	93574757	+	hs|Xq21.33		chrX:93574757-93574816
A_33_P3318661	-5.38984	-2.43024	5.38984	down	E2F7	E2F transcription factor 7	FALSE	Homo sapiens E2F transcription factor 7 (E2F7), mRNA [NM_203394]	144455	GO:0005515|GO:0005667|GO:0032466|GO:0000977|GO:0003700|GO:0008285|GO:0030330|GO:0003714|GO:0060707|GO:0032877|GO:2000134|GO:0001047|GO:0002040|GO:0005634|GO:0000122|GO:0001890|GO:0001227|GO:0071930|GO:0006351|GO:0042802|GO:0045944|GO:0060718|GO:0070365	77417635	chr12	77417576	-	hs|12q21.2	NM_203394	chr12:77417635-77417576	NM_203394	Hs.416375
A_32_P114003	-5.3768	-2.42675	5.3768	down	ZFHX4-AS1	ZFHX4 antisense RNA 1	FALSE	Homo sapiens ZFHX4 antisense RNA 1 (ZFHX4-AS1), long non-coding RNA [NR_024360]	100192378		77523448	chr8	77523389	-	hs|8q21.11	NR_024360	chr8:77523448-77523389	NR_024360	Hs.596420
A_24_P175612	-5.3733	-2.42581	5.3733	down	SFXN2	sideroflexin 2	FALSE	Homo sapiens sideroflexin 2 (SFXN2), mRNA [NM_178858]	118980	GO:0034220|GO:0015075|GO:0005743|GO:0016021|GO:0055072	104498433	chr10	104498374	+	hs|10q24.32	NM_178858	chr10:104498374-104498433	NM_178858	Hs.44070
A_23_P25293	-5.36126	-2.42257	5.36126	down	NCAPD2	non-SMC condensin I complex, subunit D2	FALSE	Homo sapiens non-SMC condensin I complex, subunit D2 (NCAPD2), mRNA [NM_014865]	9918	GO:0000796|GO:0005515|GO:0000793|GO:0000797|GO:0007076|GO:0005634|GO:0000228|GO:0005829|GO:0042393|GO:0005737|GO:0016020|GO:0005654|GO:0045120|GO:0000278|GO:0051301	6640657	chr12	6640598	+	hs|12p13.31	NM_014865	chr12:6640598-6640657	NM_014865	Hs.5719
A_33_P3406030	-5.35899	-2.42196	5.35899	down	LRRC8C	leucine rich repeat containing 8 family, member C	FALSE	Homo sapiens leucine rich repeat containing 8 family, member C (LRRC8C), mRNA [NM_032270]	84230	GO:0005515|GO:0016020|GO:0005886|GO:0005789|GO:0045444|GO:0016021|GO:0006811	90152169	chr1	90152110	+	hs|1p22.2	NM_032270	chr1:90152110-90152169	NM_032270	Hs.412836
A_33_P3343452	-5.34512	-2.41822	5.34512	down	ANKRD30B	ankyrin repeat domain 30B	FALSE	Homo sapiens ankyrin repeat domain 30B (ANKRD30B), mRNA [NM_001145029]	374860	GO:0008150|GO:0003674|GO:0005575	14797852	chr18	14797793	+	hs|18p11.21	NM_001145029	chr18:14797793-14797852	NM_001145029	Hs.567889
A_23_P354297	-5.33284	-2.4149	5.33284	down	CHTF18	CTF18, chromosome transmission fidelity factor 18 homolog (S. cerevisiae)	FALSE	Homo sapiens CTF18, chromosome transmission fidelity factor 18 homolog (S. cerevisiae) (CHTF18), mRNA [NM_022092]	63922	GO:0006260|GO:0005737|GO:0016020|GO:0051985|GO:0005654|GO:0007283|GO:0005524|GO:0003677|GO:0007140|GO:0007131	848004	chr16	847945	+	hs|16p13.3	NM_022092	chr16:847945-848004	NM_022092	Hs.153850
A_23_P216355	-5.33065	-2.41431	5.33065	down	TONSL	tonsoku-like, DNA repair protein	FALSE	Homo sapiens tonsoku-like, DNA repair protein (TONSL), mRNA [NM_013432]	4796	GO:0005515|GO:0042555|GO:0042393|GO:0035101|GO:0005737|GO:0000724|GO:0003714|GO:0042994|GO:0031297|GO:0005654|GO:0043596|GO:0005662	145657715	chr8	145656523	-	hs|8q24.3	NM_013432	chr8:145657715-145656523	NM_013432	Hs.675285
A_33_P3404989	-5.31586	-2.4103	5.31586	down	HIST1H3H	histone cluster 1, H3h	FALSE	Homo sapiens histone cluster 1, H3h (HIST1H3H), mRNA [NM_003536]	8357	GO:0005515|GO:0010467|GO:0046982|GO:0006325|GO:0006335|GO:0005576|GO:0005634|GO:0000228|GO:0003677|GO:0032776|GO:0043234|GO:0060968|GO:0016020|GO:0000183|GO:0007596|GO:0045814|GO:0040029|GO:0005654|GO:0000786|GO:0070062	27778314	chr6	27778255	+	hs|6p22.1	NM_003536	chr6:27778255-27778314	NM_003536	Hs.591778
A_23_P318904	-5.30743	-2.40801	5.30743	down	SERTAD4	SERTA domain containing 4	FALSE	Homo sapiens SERTA domain containing 4 (SERTAD4), mRNA [NM_019605]	56256	GO:0005634	210416093	chr1	210416034	+	hs|1q32.2	NM_019605	chr1:210416034-210416093	NM_019605	Hs.600545
A_32_P233304	-5.29587	-2.40487	5.29587	down	LIN9	lin-9 DREAM MuvB core complex component	FALSE	Homo sapiens lin-9 DREAM MuvB core complex component (LIN9), transcript variant 1, mRNA [NM_173083]	286826	GO:0005515|GO:0071897|GO:0017053|GO:0000086|GO:0051726|GO:0005654|GO:0000278|GO:0006351	226419007	chr1	226418948	-	hs|1q42.12	NM_173083	chr1:226419007-226418948	NM_173083	Hs.120817
A_24_P68311	-5.28069	-2.40073	5.28069	down	SYNE2	spectrin repeat containing, nuclear envelope 2	FALSE	Homo sapiens spectrin repeat containing, nuclear envelope 2 (SYNE2), transcript variant 1, mRNA [NM_015180]	23224	GO:0005515|GO:0030018|GO:0034504|GO:0007097|GO:0031527|GO:0034993|GO:0005634|GO:0090286|GO:0005635|GO:0005739|GO:0005640|GO:0010761|GO:0051642|GO:0005737|GO:0051015|GO:0031022|GO:0006998|GO:0045111|GO:0070062|GO:0031965|GO:0030335|GO:0016235|GO:0031258|GO:0033017|GO:0003779|GO:0031981|GO:0007163|GO:0016529|GO:0005654|GO:0016021|GO:0005925	64421485	chr14	64416714	+	hs|14q23.2	NM_015180	chr14:64416714-64421485	NM_015180	Hs.745014
A_23_P87769	-5.27875	-2.4002	5.27875	down	PARPBP	PARP1 binding protein	FALSE	Homo sapiens PARP1 binding protein (PARPBP), mRNA [NM_017915]	55010	GO:0005515|GO:2000042|GO:0005737|GO:0006281|GO:0005654|GO:0003677|GO:0000785	102591211	chr12	102591152	+	hs|12q23.2	NM_017915	chr12:102591152-102591211	NM_017915	Hs.330663
A_32_P151544	-5.27398	-2.39889	5.27398	down	KRT18	keratin 18, type I	FALSE	Homo sapiens keratin 18, type I (KRT18), transcript variant 1, mRNA [NM_000224]	3875	GO:0005515|GO:0005882|GO:0048471|GO:0043066|GO:0005815|GO:0045104|GO:0034451|GO:0097284|GO:0005730|GO:0097191|GO:0009653|GO:0033209|GO:0071944|GO:0005737|GO:0007049|GO:0005198|GO:0097110|GO:0016032|GO:0045095|GO:0043000|GO:0070062	53346554	chr12	53346116	+	hs|12q13.13	NM_000224	chr12:53346116-53346554	NM_000224	Hs.406013
A_23_P349771	-5.2619	-2.39559	5.2619	down	HAUS5	HAUS augmin-like complex, subunit 5	FALSE	Homo sapiens HAUS augmin-like complex, subunit 5 (HAUS5), mRNA [NM_015302]	23354	GO:0051297|GO:0003674|GO:0007067|GO:0005813|GO:0005737|GO:0005874|GO:0005819|GO:0070652|GO:0051225|GO:0051301	36115769	chr19	36115710	+	hs|19q13.12	NM_015302	chr19:36115710-36115769	NM_015302	Hs.7426
A_33_P3275707	-5.25826	-2.39459	5.25826	down	AP1S3	adaptor-related protein complex 1, sigma 3 subunit	FALSE	Homo sapiens adaptor-related protein complex 1, sigma 3 subunit (AP1S3), transcript variant 1, mRNA [NM_001039569]	130340	GO:0006892|GO:0006605|GO:0005765|GO:0032588|GO:0030117|GO:0005829|GO:0050690|GO:0019886|GO:0005905|GO:0000139|GO:0008565|GO:0061024|GO:0016032|GO:0030659	224620198	chr2	224620139	-	hs|2q36.1	NM_001039569	chr2:224620198-224620139	NM_001039569	Hs.632555
A_33_P3284951	-5.2295	-2.38667	5.2295	down	MCM5	minichromosome maintenance complex component 5	FALSE	Homo sapiens minichromosome maintenance complex component 5 (MCM5), mRNA [NM_006739]	4174	GO:0005515|GO:0042555|GO:0005634|GO:0003677|GO:0005524|GO:0003678|GO:0006260|GO:0000082|GO:0006271|GO:0016020|GO:0006270|GO:0005654|GO:0032508|GO:0000278	35813848	chr22	35813789	+	hs|22q12.3	NM_006739	chr22:35813789-35813848	NM_006739	Hs.517582
A_24_P84970	-5.22949	-2.38667	5.22949	down			FALSE	keratin 18 pseudogene 42 [Source:HGNC Symbol;Acc:HGNC:33412] [ENST00000505048]			108925054	chr5	108924995	+	hs|5q21.3		chr5:108924995-108925054
A_23_P24129	-5.22225	-2.38467	5.22225	down	DKK1	dickkopf WNT signaling pathway inhibitor 1	FALSE	Homo sapiens dickkopf WNT signaling pathway inhibitor 1 (DKK1), mRNA [NM_012242]	22943	GO:0005515|GO:0090082|GO:0005886|GO:0030178|GO:0042662|GO:0042663|GO:0030326|GO:0090244|GO:0060394|GO:0005615|GO:0030514|GO:0031333|GO:0033137|GO:0004871|GO:0032526|GO:0090090|GO:0001942|GO:0048019|GO:0001706|GO:0001707|GO:2000726|GO:0005576|GO:0000122|GO:0048642|GO:0000904|GO:0060325|GO:1900116|GO:0031901|GO:0002090|GO:0030900|GO:0008083|GO:0050750	54076746	chr10	54076687	+	hs|10q21.1	NM_012242	chr10:54076687-54076746	NM_012242	Hs.40499
A_33_P3406572	-5.21572	-2.38287	5.21572	down	lnc-VAPB-1	lnc-VAPB-1:5	FALSE	Homo sapiens cDNA FLJ34385 fis, clone HCHON1000142. [AK091704]			57099816	chr20	57099757	+	hs|20q13.32		chr20:57099757-57099816		Hs.729646
A_23_P122216	-5.21461	-2.38256	5.21461	down	LOX	lysyl oxidase	FALSE	Homo sapiens lysyl oxidase (LOX), transcript variant 1, mRNA [NM_002317]	4015	GO:0005515|GO:0005581|GO:0001568|GO:0005507|GO:0030324|GO:0042493|GO:0004720|GO:0005578|GO:0005576|GO:0005634|GO:0048545|GO:0005615|GO:0030198|GO:0030199|GO:0042060|GO:0006464|GO:0055114|GO:0048251	121405845	chr5	121405786	-	hs|5q23.2	NM_002317	chr5:121405845-121405786	NM_002317	Hs.102267
A_24_P247454	-5.20737	-2.38056	5.20737	down			FALSE	keratin 18 pseudogene 19 [Source:HGNC Symbol;Acc:HGNC:33387] [ENST00000395181]			190176666	chr2	190176607	-	hs|2q32.2		chr2:190176666-190176607
A_33_P3213342	-5.1699	-2.37014	5.1699	down	CASC5	cancer susceptibility candidate 5	FALSE	Homo sapiens cancer susceptibility candidate 5 (CASC5), transcript variant 1, mRNA [NM_170589]	57082	GO:0005515|GO:0001675|GO:0001669|GO:0034501|GO:0006334|GO:0005634|GO:0005829|GO:0034080|GO:0005737|GO:0007067|GO:0010923|GO:0071173|GO:0000777|GO:0005654|GO:0000278|GO:0008608|GO:0070062|GO:0051301	40954881	chr15	40954822	+	hs|15q15.1	NM_170589	chr15:40954822-40954881	NM_170589	Hs.181855
A_33_P3261982	-5.14874	-2.36422	5.14874	down	PRIM2	primase, DNA, polypeptide 2 (58kDa)	FALSE	Homo sapiens primase, DNA, polypeptide 2 (58kDa) (PRIM2), transcript variant 1, mRNA [NM_000947]	5558	GO:0051539|GO:0003896|GO:0003677|GO:0046872|GO:0000082|GO:0006271|GO:0000723|GO:0006270|GO:0000722|GO:0006269|GO:0005654|GO:0000278|GO:0032201	57512702	chr6	57512643	+	hs|6p11.2	NM_000947	chr6:57512643-57512702	NM_000947	Hs.654580
A_23_P81912	-5.13513	-2.3604	5.13513	down	TUBB	tubulin, beta class I	FALSE	Homo sapiens tubulin, beta class I (TUBB), transcript variant 2, mRNA [NM_178014]	203068	GO:0005515|GO:0051258|GO:0042288|GO:0042267|GO:0003924|GO:0006928|GO:0005634|GO:0032403|GO:0005829|GO:0000086|GO:0005641|GO:0005856|GO:0007017|GO:0031625|GO:0070062|GO:0006996|GO:0009987|GO:0005874|GO:0019904|GO:0005525|GO:0051225|GO:0044297|GO:0006184|GO:0030705|GO:0032794|GO:0005198|GO:0005200|GO:0000278|GO:0051301	30691964	chr6	30691905	+	hs|6p21.33	NM_178014	chr6:30691905-30691964	NM_178014	Hs.636480
A_23_P373708	-5.12634	-2.35793	5.12634	down	KRT18P55	keratin 18 pseudogene 55	FALSE	Homo sapiens keratin 18 pseudogene 55 (KRT18P55), non-coding RNA [NR_028334]	284085		26603822	chr17	26603763	-	hs|17q11.2	NR_028334	chr17:26603822-26603763	NR_028334	Hs.371796
A_33_P3240843	-5.12472	-2.35747	5.12472	down	TMEM71	transmembrane protein 71	FALSE	Homo sapiens transmembrane protein 71 (TMEM71), transcript variant 1, mRNA [NM_144649]	137835	GO:0016021	133734346	chr8	133734287	-	hs|8q24.22	NM_144649	chr8:133734346-133734287	NM_144649	Hs.293842
A_19_P00317691	-5.09017	-2.34771	5.09017	down	DLEU2	deleted in lymphocytic leukemia 2 (non-protein coding)	FALSE	Homo sapiens deleted in lymphocytic leukemia, 2, mRNA (cDNA clone IMAGE:5516523). [BC033120]	8847		50614844	chr13	50614785	-	hs|13q14.2	BC033120	chr13:50614844-50614785		Hs.547964
A_19_P00321593	-5.07359	-2.34301	5.07359	down	FBXL5	F-box and leucine-rich repeat protein 5	FALSE	F-box and leucine-rich repeat protein 5 [Source:HGNC Symbol;Acc:HGNC:13602] [ENST00000514541]	26234	GO:0005515|GO:0048471|GO:0004842|GO:0016567|GO:0005506|GO:0000151|GO:0031146|GO:0055072|GO:0019005	15683022	chr4	15682963	-	hs|4p15.32	XR_425710	chr4:15683022-15682963	XR_425710	Hs.668190
A_33_P3323847	-5.07221	-2.34261	5.07221	down	RECQL4	RecQ protein-like 4	FALSE	Homo sapiens RecQ protein-like 4 (RECQL4), mRNA [NM_004260]	9401	GO:0043140|GO:0000405|GO:0005634|GO:0006310|GO:0007275|GO:0005524|GO:0006260|GO:0000733|GO:0005737|GO:0006281|GO:0016020|GO:0008270|GO:0032508	145736731	chr8	145736672	-	hs|8q24.3	NM_004260	chr8:145736731-145736672	NM_004260	Hs.31442
A_23_P207400	-5.06394	-2.34026	5.06394	down	BRCA1	breast cancer 1, early onset	FALSE	Homo sapiens breast cancer 1, early onset (BRCA1), transcript variant 2, mRNA [NM_007300]	672	GO:0005515|GO:0043627|GO:0004842|GO:0044212|GO:0016874|GO:0009048|GO:0050681|GO:0070531|GO:0042127|GO:0044030|GO:0031398|GO:0006978|GO:0031625|GO:0005694|GO:0003713|GO:0031436|GO:0046600|GO:0051865|GO:0043234|GO:0006281|GO:0005654|GO:0008270|GO:0045893|GO:0019899|GO:0045892|GO:0008274|GO:0016567|GO:0005886|GO:0007098|GO:0003723|GO:0031572|GO:0000151|GO:0005634|GO:0045739|GO:0035067|GO:0035066|GO:…	41196481	chr17	41196422	-	hs|17q21.31	NM_007300	chr17:41196481-41196422	NM_007300	Hs.194143
A_33_P3230881	-5.0629	-2.33996	5.0629	down	ALG10	ALG10, alpha-1,2-glucosyltransferase	FALSE	Homo sapiens ALG10, alpha-1,2-glucosyltransferase (ALG10), mRNA [NM_032834]	84920	GO:0016758|GO:0005789|GO:0016021|GO:0006488|GO:0044267|GO:0043687|GO:0018279	34181115	chr12	34181056	+	hs|12p11.1	NM_032834	chr12:34181056-34181115	NM_032834	Hs.102971
A_23_P410587	-5.06224	-2.33978	5.06224	down	JADE1	jade family PHD finger 1	FALSE	Homo sapiens jade family PHD finger 1 (JADE1), transcript variant 2, mRNA [NM_024900]	79960	GO:0005515|GO:0001105|GO:0030308|GO:0005886|GO:0006325|GO:0006950|GO:0006915|GO:2000134|GO:0005634|GO:0006351|GO:0045171|GO:0043981|GO:0043983|GO:0005737|GO:0043982|GO:0043966|GO:0043984|GO:0045944|GO:0000123|GO:0005654|GO:0008270	129784721	chr4	129784662	+	hs|4q28.2	NM_024900	chr4:129784662-129784721	NM_024900	Hs.12420
A_33_P3415820	-5.05682	-2.33823	5.05682	down	THBS1	thrombospondin 1	FALSE	Homo sapiens thrombospondin 1 (THBS1), mRNA [NM_003246]	7057	GO:0005515|GO:0006986|GO:0034976|GO:0003417|GO:0005615|GO:0032914|GO:0034605|GO:0001948|GO:0010763|GO:0006493|GO:0030198|GO:0032026|GO:0030335|GO:0009986|GO:0017134|GO:0005509|GO:0030169|GO:0030168|GO:0010748|GO:0010595|GO:0010751|GO:0010596|GO:0005178|GO:0010754|GO:0032570|GO:0001786|GO:0010759|GO:0005788|GO:0010757|GO:0009897|GO:0001953|GO:0005783|GO:0010811|GO:0002040|GO:0036066|GO:0000187|GO:…	39874605	chr15	39874546	+	hs|15q14	NM_003246	chr15:39874546-39874605	NM_003246	Hs.164226
A_23_P88691	-5.04978	-2.33622	5.04978	down	CHRNA5	cholinergic receptor, nicotinic, alpha 5 (neuronal)	FALSE	Homo sapiens cholinergic receptor, nicotinic, alpha 5 (neuronal) (CHRNA5), mRNA [NM_000745]	1138	GO:0030054|GO:0005886|GO:0007268|GO:0005892|GO:0035095|GO:0007165|GO:0034220|GO:0015464|GO:0045211|GO:0006810|GO:0004889|GO:0006812|GO:0015276	78885515	chr15	78885456	+	hs|15q25.1	NM_000745	chr15:78885456-78885515	NM_000745	Hs.1614
A_23_P110253	-5.04401	-2.33457	5.04401	down	KIT	v-kit Hardy-Zuckerman 4 feline sarcoma viral oncogene homolog	FALSE	Homo sapiens v-kit Hardy-Zuckerman 4 feline sarcoma viral oncogene homolog (KIT), transcript variant 1, mRNA [NM_000222]	3815	GO:0005515|GO:0008360|GO:0019221|GO:0007286|GO:0007283|GO:0002020|GO:0005615|GO:0042803|GO:0035234|GO:0043069|GO:0043552|GO:0007173|GO:0042127|GO:0031274|GO:0002327|GO:0038162|GO:0023014|GO:0002320|GO:0043303|GO:0030335|GO:0006687|GO:0031532|GO:0032762|GO:0014068|GO:0018108|GO:0035855|GO:0019955|GO:0008543|GO:0045087|GO:0008542|GO:0038093|GO:0002371|GO:0009898|GO:0002318|GO:0038095|GO:0009897|GO:…	55606570	chr4	55606511	+	hs|4q12	NM_000222	chr4:55606511-55606570	NM_000222	Hs.479754
A_19_P00320798	-5.03027	-2.33064	5.03027	down			FALSE				86020041	chr1	86019982	-	hs|1p22.3		chr1:086020041-086019982
A_33_P3217123	-5.026	-2.32941	5.026	down	BCL2L12	BCL2-like 12 (proline rich)	FALSE	Homo sapiens BCL2-like 12 (proline rich) (BCL2L12), transcript variant 1, mRNA [NM_138639]	83596	GO:0005515|GO:0002039|GO:0016020|GO:0045944|GO:0005634|GO:2000773	50177156	chr19	50177097	+	hs|19q13.33	NM_138639	chr19:50177097-50177156	NM_138639	Hs.289052
A_23_P7976	-5.02288	-2.32852	5.02288	down	HIST1H1E	histone cluster 1, H1e	FALSE	Homo sapiens histone cluster 1, H1e (HIST1H1E), mRNA [NM_005321]	3008	GO:0005515|GO:0005720|GO:0006334|GO:0016584|GO:0005634|GO:0000786|GO:0031490|GO:0070062	26156987	chr6	26156928	+	hs|6p22.2	NM_005321	chr6:26156928-26156987	NM_005321	Hs.248133
A_23_P89941	-5.00899	-2.32452	5.00899	down	CDKN2D	cyclin-dependent kinase inhibitor 2D (p19, inhibits CDK4)	FALSE	Homo sapiens cyclin-dependent kinase inhibitor 2D (p19, inhibits CDK4) (CDKN2D), transcript variant 1, mRNA [NM_001800]	1032	GO:0005515|GO:0048102|GO:0030308|GO:0008285|GO:0019901|GO:0071901|GO:0007605|GO:0033280|GO:0005634|GO:0000079|GO:0005829|GO:0042326|GO:0000082|GO:0005737|GO:0000731|GO:0004861|GO:0007050|GO:0032526|GO:0043154|GO:0000278|GO:0009411	10677285	chr19	10677226	-	hs|19p13.2	NM_001800	chr19:10677285-10677226	NM_001800	Hs.435051
A_33_P3220202	-5.00172	-2.32242	5.00172	down	PKN3	protein kinase N3	FALSE	Homo sapiens protein kinase N3 (PKN3), mRNA [NM_013355]	29941	GO:0005515|GO:0007165|GO:0048471|GO:0005794|GO:0004672|GO:0010631|GO:0006468|GO:0005634|GO:0004697|GO:0005524	131483187	chr9	131483128	+	hs|9q34.11	NM_013355	chr9:131483128-131483187	NM_013355	Hs.300485
A_23_P9458	-4.99677	-2.32099	4.99677	down	POLR1E	polymerase (RNA) I polypeptide E, 53kDa	FALSE	Homo sapiens polymerase (RNA) I polypeptide E, 53kDa (POLR1E), transcript variant 1, mRNA [NM_022490]	64425	GO:0010467|GO:0009303|GO:0006363|GO:0005730|GO:0006362|GO:0006361|GO:0005634|GO:0006360|GO:0003677|GO:0001189|GO:0001179|GO:0005736|GO:0045814|GO:0001054|GO:0040029|GO:0005654	37501770	chr9	37501711	+	hs|9p13.2	NM_022490	chr9:37501711-37501770	NM_022490	Hs.591087
A_23_P214487	-4.98672	-2.31809	4.98672	down	HIST1H4C	histone cluster 1, H4c	FALSE	Homo sapiens histone cluster 1, H4c (HIST1H4C), mRNA [NM_003542]	8364	GO:0005515|GO:0010467|GO:0006325|GO:0005634|GO:0045653|GO:0000723|GO:0000183|GO:0000786|GO:0070062|GO:0035574|GO:0035575|GO:0046982|GO:0006334|GO:0006335|GO:0005576|GO:0006336|GO:0000228|GO:0003677|GO:0032776|GO:0034080|GO:0043234|GO:0016020|GO:0045814|GO:0040029|GO:0005654|GO:0000278	26104527	chr6	26104468	+	hs|6p22.2	NM_003542	chr6:26104468-26104527	NM_003542	Hs.46423
A_24_P349151	-4.98282	-2.31696	4.98282	down	SASS6	spindle assembly 6 homolog (C. elegans)	FALSE	Homo sapiens spindle assembly 6 homolog (C. elegans) (SASS6), mRNA [NM_194292]	163786	GO:0005515|GO:0051298|GO:0005813|GO:0007099|GO:0005814	100549656	chr1	100549597	-	hs|1p21.2	NM_194292	chr1:100549656-100549597	NM_194292	Hs.591447
A_24_P253780	-4.96933	-2.31305	4.96933	down	DBF4B	DBF4 zinc finger B	FALSE	Homo sapiens DBF4 zinc finger B (DBF4B), transcript variant 1, mRNA [NM_145663]	80174	GO:0000790|GO:0008284|GO:0016235|GO:0019901|GO:0005634|GO:0030295|GO:0003676|GO:0043231|GO:0005737|GO:0007049|GO:0010971|GO:0010571|GO:0045860|GO:0005654|GO:0008270	42818762	chr17	42815792	+	hs|17q21.31	NM_145663	chr17:42815792-42818762	NM_145663	Hs.369998
A_23_P57277	-4.96196	-2.31091	4.96196	down	MAP3K7CL	MAP3K7 C-terminal like	FALSE	Homo sapiens MAP3K7 C-terminal like (MAP3K7CL), transcript variant 1, mRNA [NM_020152]	56911	GO:0005515|GO:0005634|GO:0005829	30547418	chr21	30547359	+	hs|21q21.3	NM_020152	chr21:30547359-30547418	NM_020152	Hs.222802
A_33_P3245321	-4.95759	-2.30964	4.95759	down	CENPP	centromere protein P	FALSE	Homo sapiens centromere protein P (CENPP), transcript variant 1, mRNA [NM_001012267]	401541	GO:0034080|GO:0006334|GO:0005654|GO:0000278|GO:0000775|GO:0005829	95375430	chr9	95375371	+	hs|9q22.31	NM_001012267	chr9:95375371-95375430	NM_001012267	Hs.713775
A_23_P136817	-4.94428	-2.30576	4.94428	down	KNTC1	kinetochore associated 1	FALSE	Homo sapiens kinetochore associated 1 (KNTC1), mRNA [NM_014708]	9735	GO:0005515|GO:0005828|GO:0007093|GO:0005886|GO:0007096|GO:0005634|GO:0015629|GO:0005829|GO:0000922|GO:0005737|GO:0007067|GO:0006461|GO:0000777|GO:0000278|GO:0051301	123107037	chr12	123106487	+	hs|12q24.31	NM_014708	chr12:123106487-123107037	NM_014708	Hs.300559
A_33_P3386344	-4.94105	-2.30482	4.94105	down	FANCA	Fanconi anemia, complementation group A	FALSE	Homo sapiens Fanconi anemia, complementation group A (FANCA), transcript variant 2, mRNA [NM_001018112]	2175	GO:0005515|GO:0008585|GO:0005737|GO:0006461|GO:0006281|GO:0042127|GO:0005730|GO:0005654|GO:0005634|GO:0008584|GO:0043240|GO:0007140	89877175	chr16	89877116	-	hs|16q24.3	NM_001018112	chr16:89877175-89877116	NM_001018112	Hs.744083
A_32_P95914	-4.93834	-2.30403	4.93834	down	MMS22L	MMS22-like, DNA repair protein	FALSE	Homo sapiens MMS22-like, DNA repair protein (MMS22L), mRNA [NM_198468]	253714	GO:0005515|GO:0042555|GO:0035101|GO:0000724|GO:0031297|GO:0005654|GO:0043596	97590265	chr6	97590206	-	hs|6q16.1	NM_198468	chr6:97590265-97590206	NM_198468	Hs.444292
A_23_P28733	-4.93401	-2.30276	4.93401	down	RBL1	retinoblastoma-like 1	FALSE	Homo sapiens retinoblastoma-like 1 (RBL1), transcript variant 1, mRNA [NM_002895]	5933	GO:0005515|GO:0005667|GO:0010467|GO:0006367|GO:0043550|GO:0005634|GO:0000122|GO:0006351|GO:0045944|GO:0051726|GO:0016032|GO:0005654|GO:0007179|GO:0000278|GO:0008134|GO:0016568	35627256	chr20	35627197	-	hs|20q11.23	NM_002895	chr20:35627256-35627197	NM_002895	Hs.207745
A_24_P128308	-4.92942	-2.30142	4.92942	down	KLF6	Kruppel-like factor 6	FALSE	Kruppel-like factor 6 [Source:HGNC Symbol;Acc:HGNC:2235] [ENST00000469435]	1316	GO:0005737|GO:0030183|GO:0019221|GO:0005634|GO:0045893|GO:0003677|GO:0046872|GO:0006351	3823035	chr10	3822976	-	hs|10p15.1	FW339972	chr10:3823035-3822976		Hs.4055
A_23_P410625	-4.92302	-2.29954	4.92302	down	ZNF367	zinc finger protein 367	FALSE	Homo sapiens zinc finger protein 367 (ZNF367), mRNA [NM_153695]	195828	GO:0003700|GO:0006357|GO:0005654|GO:0005634|GO:0003677|GO:0046872|GO:0006351	99157186	chr9	99157127	-	hs|9q22.32	NM_153695	chr9:99157186-99157127	NM_153695	Hs.494557
A_33_P3346533	-4.90318	-2.29372	4.90318	down			FALSE				90015787	chr11	90015728	-	hs|11q14.3		chr11:090015787-090015728
A_33_P3337584	-4.90196	-2.29336	4.90196	down	LOC283482	uncharacterized LOC283482	FALSE	PREDICTED: Homo sapiens uncharacterized LOC283482 (LOC283482), misc_RNA [XR_247950]	283482		103351555	chr13	103351496	-	hs|13q33.1	XR_247950	chr13:103351555-103351496	XR_247950	Hs.732796
A_23_P345118	-4.88967	-2.28974	4.88967	down	PIM1	Pim-1 proto-oncogene, serine/threonine kinase	FALSE	Homo sapiens Pim-1 proto-oncogene, serine/threonine kinase (PIM1), transcript variant 1, mRNA [NM_002648]	5292	GO:0005515|GO:0043066|GO:0030145|GO:0005886|GO:0008283|GO:0006915|GO:0005634|GO:0007275|GO:0005524|GO:0043433|GO:0007346|GO:0031659|GO:0005737|GO:0007049|GO:0046777|GO:0004674|GO:0030212|GO:0006468|GO:0043024|GO:0008134	37143161	chr6	37143102	+	hs|6p21.2	NM_002648	chr6:37143102-37143161	NM_002648	Hs.81170
A_33_P3288110	-4.87177	-2.28445	4.87177	down	PKP4	plakophilin 4	FALSE	Homo sapiens plakophilin 4 (PKP4), transcript variant 2, mRNA [NM_001005476]	8502	GO:0005515|GO:0030057|GO:0072686|GO:0048471|GO:0005886|GO:0032467|GO:0044291|GO:0007267|GO:0030496|GO:0014069|GO:0051233|GO:0030155|GO:0000922|GO:0005737|GO:0016337|GO:0032321|GO:0005911|GO:0007043|GO:0009898|GO:0005856	159514825	chr2	159514766	+	hs|2q24.1	NM_001005476	chr2:159514766-159514825	NM_001005476	Hs.407580
A_32_P9382	-4.86771	-2.28324	4.86771	down	MZT1	mitotic spindle organizing protein 1	FALSE	Homo sapiens mitotic spindle organizing protein 1 (MZT1), mRNA [NM_001071775]	440145	GO:0005515|GO:0005813|GO:0005819|GO:0033566|GO:0008274	73282693	chr13	73282634	-	hs|13q21.33	NM_001071775	chr13:73282693-73282634	NM_001071775	Hs.28465
A_33_P3352073	-4.86485	-2.2824	4.86485	down	MBNL1-AS1	MBNL1 antisense RNA 1	FALSE	Homo sapiens MBNL1 antisense RNA 1 (MBNL1-AS1), transcript variant 1, long non-coding RNA [NR_027038]	401093		151980488	chr3	151980429	-	hs|3q25.1	NR_027038	chr3:151980488-151980429	NR_027038	Hs.725347
A_23_P146830	-4.85488	-2.27944	4.85488	down	SLC25A10	solute carrier family 25 (mitochondrial carrier; dicarboxylate transporter), member 10	FALSE	Homo sapiens solute carrier family 25 (mitochondrial carrier; dicarboxylate transporter), member 10 (SLC25A10), transcript variant 2, mRNA [NM_012140]	1468	GO:0005515|GO:0005310|GO:0005975|GO:0005743|GO:0006094|GO:0005634|GO:0044281|GO:0055085|GO:0034641|GO:0000096|GO:0000098|GO:0009405|GO:0006006|GO:0006835|GO:0016021|GO:0070221|GO:0006839|GO:0006811	79687584	chr17	79687525	+	hs|17q25.3	NM_012140	chr17:79687525-79687584	NM_012140	Hs.548187
A_23_P32707	-4.84866	-2.27759	4.84866	down	ESPL1	extra spindle pole bodies homolog 1 (S. cerevisiae)	FALSE	Homo sapiens extra spindle pole bodies homolog 1 (S. cerevisiae) (ESPL1), mRNA [NM_012291]	9700	GO:0005515|GO:0005813|GO:0045842|GO:0006915|GO:0005634|GO:0003824|GO:0045875|GO:0000212|GO:0005829|GO:0000910|GO:0000070|GO:0045143|GO:0040001|GO:0006508|GO:0008234|GO:0000278	53687109	chr12	53686748	+	hs|12q13.13	NM_012291	chr12:53686748-53687109	NM_012291	Hs.153479
A_19_P00810205	-4.83874	-2.27463	4.83874	down			FALSE	CCNB2 pseudogene 1 [Source:HGNC Symbol;Acc:HGNC:50850] [ENST00000399411]			7949226	chr7	7949167	-	hs|7p21.3		chr7:7949226-7949167
A_23_P10385	-4.82483	-2.27048	4.82483	down	DTL	denticleless E3 ubiquitin protein ligase homolog (Drosophila)	FALSE	Homo sapiens denticleless E3 ubiquitin protein ligase homolog (Drosophila) (DTL), transcript variant 1, mRNA [NM_016448]	51514	GO:0000209|GO:0005515|GO:0006511|GO:0031965|GO:0004842|GO:0005813|GO:0006513|GO:0005694|GO:0031572|GO:0005730|GO:0005634|GO:0019985|GO:0006974|GO:0043231|GO:0006260|GO:0005737|GO:0051726|GO:0031465|GO:0005654|GO:0031464|GO:0009411	212277911	chr1	212277852	+	hs|1q32.3	NM_016448	chr1:212277852-212277911	NM_016448	Hs.656473
A_33_P3287879	-4.82352	-2.27009	4.82352	down	HIST1H3H	histone cluster 1, H3h	FALSE	Homo sapiens histone cluster 1, H3h (HIST1H3H), mRNA [NM_003536]	8357	GO:0005515|GO:0010467|GO:0046982|GO:0006325|GO:0006335|GO:0005576|GO:0005634|GO:0000228|GO:0003677|GO:0032776|GO:0043234|GO:0060968|GO:0016020|GO:0000183|GO:0007596|GO:0045814|GO:0040029|GO:0005654|GO:0000786|GO:0070062	27778100	chr6	27778041	+	hs|6p22.1	NM_003536	chr6:27778041-27778100	NM_003536	Hs.591778
A_24_P333571	-4.8193	-2.26882	4.8193	down	ARHGAP29	Rho GTPase activating protein 29	FALSE	Rho GTPase activating protein 29 [Source:HGNC Symbol;Acc:HGNC:30207] [ENST00000370217]	9411	GO:0051056|GO:0032321|GO:0007264|GO:0007266|GO:0030165|GO:0046872|GO:0005100|GO:0005829	94667593	chr1	94667534	-	hs|1p22.1	BC022483	chr1:94667593-94667534		Hs.483238
A_19_P00808213	-4.81665	-2.26803	4.81665	down	ZNF678	zinc finger protein 678	FALSE	Homo sapiens zinc finger protein 678 (ZNF678), transcript variant 1, mRNA [NM_178549]	339500	GO:0006355|GO:0005634|GO:0003677|GO:0046872|GO:0006351	227850041	chr1	227849982	+	hs|1q42.13	NM_178549	chr1:227849982-227850041	NM_178549	Hs.30323
A_32_P219116	-4.80926	-2.26581	4.80926	down	CENPJ	centromere protein J	FALSE	Homo sapiens centromere protein J (CENPJ), transcript variant 1, mRNA [NM_018451]	55835	GO:0005515|GO:0005813|GO:0006996|GO:0007099|GO:0019901|GO:0005814|GO:0019904|GO:0005874|GO:0046599|GO:0005829|GO:0046785|GO:0015631|GO:0000086|GO:0007020|GO:0000278|GO:0008275|GO:0051301	25457465	chr13	25457406	-	hs|13q12.12	NM_018451	chr13:25457465-25457406	NM_018451	Hs.741581
A_23_P202392	-4.79961	-2.26292	4.79961	down	SUV39H2	suppressor of variegation 3-9 homolog 2 (Drosophila)	FALSE	Homo sapiens suppressor of variegation 3-9 homolog 2 (Drosophila) (SUV39H2), transcript variant 3, mRNA [NM_024670]	79723	GO:0005515|GO:0000976|GO:0006325|GO:0071456|GO:0000122|GO:0030154|GO:0006351|GO:0006333|GO:0005720|GO:0036123|GO:0003682|GO:0036124|GO:0046974|GO:0008270|GO:0005654|GO:0006338|GO:0048511|GO:0042754|GO:0045892|GO:0000785|GO:0000775|GO:0007140	14944700	chr10	14944641	+	hs|10p13	NM_024670	chr10:14944641-14944700	NM_024670	Hs.554883
A_23_P23765	-4.78776	-2.25935	4.78776	down	ITGB3BP	integrin beta 3 binding protein (beta3-endonexin)	FALSE	Homo sapiens integrin beta 3 binding protein (beta3-endonexin) (ITGB3BP), transcript variant 2, mRNA [NM_014288]	23421	GO:0048011|GO:0006355|GO:0043065|GO:0006334|GO:0005634|GO:0008022|GO:0097190|GO:0006351|GO:0005829|GO:0034080|GO:0007165|GO:0005737|GO:0007067|GO:0016020|GO:0000777|GO:0005654|GO:0004871|GO:0000278|GO:0007155|GO:0051301	63920569	chr1	63920094	-	hs|1p31.3	NM_014288	chr1:63920569-63920094	NM_014288	Hs.166539
A_23_P32021	-4.78022	-2.25708	4.78022	down	FANCC	Fanconi anemia, complementation group C	FALSE	Homo sapiens Fanconi anemia, complementation group C (FANCC), transcript variant 1, mRNA [NM_000136]	2176	GO:0005515|GO:0005737|GO:0006461|GO:0006281|GO:0019430|GO:0005654|GO:0005634|GO:0006289|GO:0002262|GO:0007281|GO:0043240|GO:0005829	97861581	chr9	97861522	-	hs|9q22.32	NM_000136	chr9:97861581-97861522	NM_000136	Hs.494529
A_33_P3327165	-4.77213	-2.25463	4.77213	down	CCDC18	coiled-coil domain containing 18	FALSE	Homo sapiens coiled-coil domain containing 18 (CCDC18), mRNA [NM_206886]	343099		93730334	chr1	93730275	+	hs|1p22.1	NM_206886	chr1:93730275-93730334	NM_206886	Hs.745125
A_33_P3344243	-4.76821	-2.25345	4.76821	down	C4orf46	chromosome 4 open reading frame 46	FALSE	Homo sapiens chromosome 4 open reading frame 46 (C4orf46), transcript variant 1, mRNA [NM_001008393]	201725		159587916	chr4	159587857	-	hs|4q32.1	NM_001008393	chr4:159587916-159587857	NM_001008393	Hs.380920
A_32_P115050	-4.7635	-2.25202	4.7635	down	HHIP-AS1	HHIP antisense RNA 1	FALSE	Homo sapiens HHIP antisense RNA 1 (HHIP-AS1), long non-coding RNA [NR_037595]	646576		145564837	chr4	145564778	-	hs|4q31.21	NR_037595	chr4:145564837-145564778	NR_037595	Hs.632595
A_24_P133488	-4.75639	-2.24987	4.75639	down	CDCA4	cell division cycle associated 4	FALSE	Homo sapiens cell division cycle associated 4 (CDCA4), transcript variant 1, mRNA [NM_017955]	55038	GO:0005515|GO:0005634	105476786	chr14	105476727	-	hs|14q32.33	NM_017955	chr14:105476786-105476727	NM_017955	Hs.34045
A_23_P55544	-4.74205	-2.24551	4.74205	down	CCBE1	collagen and calcium binding EGF domains 1	FALSE	Homo sapiens collagen and calcium binding EGF domains 1 (CCBE1), mRNA [NM_133459]	147372	GO:0005581|GO:0005509|GO:0005518|GO:0005578|GO:0002040|GO:0048845|GO:1900748|GO:0002020|GO:0005615|GO:0010575|GO:0045766|GO:0010595|GO:0001946|GO:0010954	57102090	chr18	57102031	-	hs|18q21.32	NM_133459	chr18:57102090-57102031	NM_133459	Hs.34333
A_19_P00801354	-4.73896	-2.24457	4.73896	down			FALSE				15669229	chr4	15669170	-	hs|4p15.32		chr4:015669229-015669170
A_23_P88740	-4.73723	-2.24404	4.73723	down	CENPN	centromere protein N	FALSE	Homo sapiens centromere protein N (CENPN), transcript variant 3, mRNA [NM_018455]	55839	GO:0034080|GO:0007067|GO:0007059|GO:0006334|GO:0000777|GO:0005654|GO:0005634|GO:0000278|GO:0005829	81056408	chr16	81053871	+	hs|16q23.2	NM_018455	chr16:81053871-81056408	NM_018455	Hs.726537
A_24_P217834	-4.73644	-2.2438	4.73644	down	HIST1H3D	histone cluster 1, H3d	FALSE	Homo sapiens histone cluster 1, H3d (HIST1H3D), mRNA [NM_003530]	8351	GO:0005515|GO:0010467|GO:0046982|GO:0006325|GO:0006335|GO:0005576|GO:0005634|GO:0000228|GO:0003677|GO:0032776|GO:0043234|GO:0060968|GO:0016020|GO:0000183|GO:0007596|GO:0045814|GO:0040029|GO:0005654|GO:0000786|GO:0070062	26197317	chr6	26197258	-	hs|6p22.2	NM_003530	chr6:26197317-26197258	NM_003530	Hs.532144
A_23_P42897	-4.71295	-2.23663	4.71295	down	MGAM	maltase-glucoamylase (alpha-glucosidase)	FALSE	Homo sapiens maltase-glucoamylase (alpha-glucosidase) (MGAM), mRNA [NM_004668]	8972	GO:0005886|GO:0005975|GO:0004339|GO:0044281|GO:0003824|GO:0016324|GO:0032450|GO:0009405|GO:0005983|GO:0030246|GO:0044245|GO:0016021|GO:0016160|GO:0070062|GO:0004558	141805645	chr7	141803212	+	hs|7q34	NM_004668	chr7:141803212-141805645	NM_004668	Hs.122785
A_24_P941759	-4.71177	-2.23627	4.71177	down	G2E3	G2/M-phase specific E3 ubiquitin protein ligase	FALSE	Homo sapiens G2/M-phase specific E3 ubiquitin protein ligase (G2E3), mRNA [NM_017769]	55632	GO:0000209|GO:0005737|GO:0004842|GO:0016874|GO:0001824|GO:0005730|GO:0006915|GO:0008270|GO:2001243	31088798	chr14	31088739	+	hs|14q12	NM_017769	chr14:31088739-31088798	NM_017769	Hs.509008
A_33_P3308905	-4.6934	-2.23063	4.6934	down	CEP57L1	centrosomal protein 57kDa-like 1	FALSE	Homo sapiens centrosomal protein 57kDa-like 1 (CEP57L1), transcript variant 4, mRNA [NM_001271853]	285753	GO:0008017|GO:0008150|GO:0003674|GO:0005737|GO:0043015|GO:0034453|GO:0005815|GO:0005874|GO:0005575|GO:0042802	109484938	chr6	109484879	+	hs|6q21	NM_001271853	chr6:109484879-109484938	NM_001271853	Hs.632616
A_33_P3319765	-4.69331	-2.23061	4.69331	down	FANCC	Fanconi anemia, complementation group C	FALSE	Homo sapiens Fanconi anemia, complementation group C (FANCC), transcript variant 3, mRNA [NM_001243744]	2176	GO:0005515|GO:0005737|GO:0006461|GO:0006281|GO:0019430|GO:0005654|GO:0005634|GO:0006289|GO:0002262|GO:0007281|GO:0043240|GO:0005829	97872930	chr9	97872871	-	hs|9q22.32	NM_001243744	chr9:97872930-97872871	NM_001243744	Hs.494529
A_32_P147078	-4.67061	-2.22361	4.67061	down	SLC8A1	solute carrier family 8 (sodium/calcium exchanger), member 1	FALSE	Homo sapiens solute carrier family 8 (sodium/calcium exchanger), member 1 (SLC8A1), transcript variant A, mRNA [NM_021097]	6546	GO:0060401|GO:0008092|GO:0005516|GO:0030018|GO:0060402|GO:0005886|GO:0006883|GO:0009791|GO:0060048|GO:0005432|GO:0046872|GO:0055074|GO:0071436|GO:0048747|GO:0016323|GO:0010649|GO:0006936|GO:0014704|GO:0044557|GO:0006811|GO:0035050|GO:0051481|GO:0010882|GO:0030506|GO:0071313|GO:0001892|GO:0010881|GO:0030315|GO:0035994|GO:0086064|GO:0055085|GO:0044325|GO:0014829|GO:0042383|GO:0070509|GO:0003007|GO:…	40339484	chr2	40339425	-	hs|2p22.1	NM_021097	chr2:40339484-40339425	NM_021097	Hs.468274
A_33_P3269899	-4.67001	-2.22343	4.67001	down	RECK	reversion-inducing-cysteine-rich protein with kazal motifs	FALSE	Homo sapiens reversion-inducing-cysteine-rich protein with kazal motifs (RECK), mRNA [NM_021111]	8434	GO:0010951|GO:0005515|GO:0016020|GO:0005886|GO:0004866|GO:0030198|GO:0007566|GO:0004867|GO:0008191|GO:0031225|GO:0001955	36083556	chr9	36083497	+	hs|9p13.3	NM_021111	chr9:36083497-36083556	NM_021111	Hs.388918
A_33_P3256858	-4.66768	-2.22271	4.66768	down	C14orf80	chromosome 14 open reading frame 80	FALSE	Homo sapiens chromosome 14 open reading frame 80 (C14orf80), transcript variant 1, mRNA [NM_001134875]	283643		105965551	chr14	105965492	+	hs|14q32.33	NM_001134875	chr14:105965492-105965551	NM_001134875	Hs.720306
A_33_P3265314	-4.66447	-2.22171	4.66447	down	LINC00452	long intergenic non-protein coding RNA 452	FALSE	long intergenic non-protein coding RNA 452 [Source:HGNC Symbol;Acc:HGNC:42800] [ENST00000609661]	643365		114626485	chr13	114626426	+	hs|13q34	XR_246655	chr13:114626426-114626485	XR_246655	Hs.740982
A_24_P136866	-4.65955	-2.22019	4.65955	down	SLC8A1	solute carrier family 8 (sodium/calcium exchanger), member 1	FALSE	Homo sapiens solute carrier family 8 (sodium/calcium exchanger), member 1 (SLC8A1), transcript variant A, mRNA [NM_021097]	6546	GO:0060401|GO:0008092|GO:0005516|GO:0030018|GO:0060402|GO:0005886|GO:0006883|GO:0009791|GO:0060048|GO:0005432|GO:0046872|GO:0055074|GO:0071436|GO:0048747|GO:0016323|GO:0010649|GO:0006936|GO:0014704|GO:0044557|GO:0006811|GO:0035050|GO:0051481|GO:0010882|GO:0030506|GO:0071313|GO:0001892|GO:0010881|GO:0030315|GO:0035994|GO:0086064|GO:0055085|GO:0044325|GO:0014829|GO:0042383|GO:0070509|GO:0003007|GO:…	40657389	chr2	40657330	-	hs|2p22.1	NM_021097	chr2:40657389-40657330	NM_021097	Hs.468274
A_23_P70328	-4.65534	-2.21889	4.65534	down	CENPQ	centromere protein Q	FALSE	Homo sapiens centromere protein Q (CENPQ), mRNA [NM_018132]	55166	GO:0034080|GO:0006334|GO:0005654|GO:0015629|GO:0000278|GO:0000775|GO:0005829	49460458	chr6	49460399	+	hs|6p12.3	NM_018132	chr6:49460399-49460458	NM_018132	Hs.88663
A_24_P54131	-4.65059	-2.21741	4.65059	down	DCLRE1B	DNA cross-link repair 1B	FALSE	Homo sapiens DNA cross-link repair 1B (DCLRE1B), mRNA [NM_022836]	64858	GO:0005515|GO:0000781|GO:0005813|GO:0008409|GO:0031860|GO:0090305|GO:0005634|GO:0031848|GO:0005737|GO:0006281|GO:0000723|GO:0000075|GO:0031627	114456032	chr1	114455973	+	hs|1p13.2	NM_022836	chr1:114455973-114456032	NM_022836	Hs.591412
A_33_P3410836	-4.64616	-2.21604	4.64616	down	HIST1H4D	histone cluster 1, H4d	FALSE	Homo sapiens histone cluster 1, H4d (HIST1H4D), mRNA [NM_003539]	8360	GO:0005515|GO:0010467|GO:0006325|GO:0005634|GO:0045653|GO:0000723|GO:0000183|GO:0000786|GO:0070062|GO:0035574|GO:0035575|GO:0046982|GO:0006334|GO:0006335|GO:0005576|GO:0006336|GO:0000228|GO:0003677|GO:0032776|GO:0034080|GO:0043234|GO:0016020|GO:0045814|GO:0040029|GO:0005654|GO:0000278	26189060	chr6	26189001	-	hs|6p22.2	NM_003539	chr6:26189060-26189001	NM_003539	Hs.248179
A_24_P288890	-4.64356	-2.21523	4.64356	down	FAM101A	family with sequence similarity 101, member A	FALSE	Homo sapiens family with sequence similarity 101, member A (FAM101A), mRNA [NM_181709]	144347	GO:0005737|GO:0005856	124799616	chr12	124799557	+	hs|12q24.31	NM_181709	chr12:124799557-124799616	NM_181709	Hs.432901
A_23_P362046	-4.6406	-2.21431	4.6406	down	TEX30	testis expressed 30	FALSE	Homo sapiens testis expressed 30 (TEX30), transcript variant 1, mRNA [NM_138779]	93081		103418860	chr13	103418801	-	hs|13q33.1	NM_138779	chr13:103418860-103418801	NM_138779	Hs.398111
A_32_P206839	-4.61775	-2.20719	4.61775	down	LOC100288911	uncharacterized LOC100288911	FALSE	Homo sapiens uncharacterized LOC100288911 (LOC100288911), long non-coding RNA [NR_037631]	100288911		36581977	chr2	36581918	-	hs|2p22.3	NR_037631	chr2:36581977-36581918	NR_037631	Hs.432924
A_23_P26557	-4.61158	-2.20526	4.61158	down	C16orf59	chromosome 16 open reading frame 59	FALSE	Homo sapiens chromosome 16 open reading frame 59 (C16orf59), mRNA [NM_025108]	80178		2514854	chr16	2514795	+	hs|16p13.3	NM_025108	chr16:2514795-2514854	NM_025108	Hs.534491
A_23_P215111	-4.60745	-2.20397	4.60745	down	ATP6V0A4	ATPase, H+ transporting, lysosomal V0 subunit a4	FALSE	Homo sapiens ATPase, H+ transporting, lysosomal V0 subunit a4 (ATP6V0A4), transcript variant 1, mRNA [NM_020632]	50617	GO:0008286|GO:0005515|GO:0005886|GO:0007605|GO:0031526|GO:0005765|GO:0006885|GO:0006879|GO:0000220|GO:0033572|GO:0016324|GO:0007035|GO:0046961|GO:0030670|GO:0051117|GO:0090382|GO:0070062|GO:0007588|GO:0070072|GO:0015986|GO:0051701|GO:0045177|GO:0055085|GO:0001503|GO:0015991|GO:0016021|GO:0010008|GO:0016471|GO:0005768|GO:0015992	138391206	chr7	138391147	-	hs|7q34	NM_020632	chr7:138391206-138391147	NM_020632	Hs.98967
A_23_P82738	-4.60515	-2.20325	4.60515	down	RAD54B	RAD54 homolog B (S. cerevisiae)	FALSE	Homo sapiens RAD54 homolog B (S. cerevisiae) (RAD54B), transcript variant 1, mRNA [NM_012415]	25788	GO:0003724|GO:0000724|GO:0015616|GO:0005634|GO:0032508|GO:0006312|GO:0005524|GO:0003677|GO:0003678|GO:0007131	95384415	chr8	95384356	-	hs|8q22.1	NM_012415	chr8:95384415-95384356	NM_012415	Hs.744229
A_23_P41948	-4.59813	-2.20105	4.59813	down	SPDL1	spindle apparatus coiled-coil protein 1	FALSE	Homo sapiens spindle apparatus coiled-coil protein 1 (SPDL1), mRNA [NM_017785]	54908	GO:0005515|GO:0031577|GO:0005815|GO:0034501|GO:0000132|GO:0005634|GO:0005829|GO:0000922|GO:0000940|GO:0043515|GO:0007080|GO:0000278|GO:0019899|GO:0051301	169031292	chr5	169031233	+	hs|5q35.1	NM_017785	chr5:169031233-169031292	NM_017785	Hs.368710
A_23_P373119	-4.59761	-2.20089	4.59761	down	HMGB3P1	high mobility group box 3 pseudogene 1	FALSE	Homo sapiens high mobility group box 3 pseudogene 1 (HMGB3P1), non-coding RNA [NR_002165]	128872		33421521	chr20	33421462	-	hs|20q11.22	NR_002165	chr20:33421521-33421462	NR_002165	Hs.558624
A_24_P384029	-4.59572	-2.20029	4.59572	down			FALSE				174296106	chr2	174296077	-	hs|2q31.1		chr2:174296106-174296077
A_24_P813147	-4.59348	-2.19959	4.59348	down	TUBB8	tubulin, beta 8 class VIII	FALSE	Homo sapiens tubulin, beta 8 class VIII (TUBB8), mRNA [NM_177987]	347688	GO:0006184|GO:0008150|GO:0003674|GO:0051258|GO:0005737|GO:0005874|GO:0005200|GO:0003924|GO:0007017|GO:0005525|GO:0070062	93404	chr10	93345	-	hs|10p15.3	NM_177987	chr10:93404-93345	NM_177987	Hs.532659
A_19_P00803654	-4.59323	-2.19951	4.59323	down			FALSE	MMU28917 60S ribosomal protein {Mus musculus} (exp=-1; wgp=0; cg=0), partial (21%) [THC2665989]			108262273	chr3	108262214	-	hs|3q13.13		chr3:108262273-108262214
A_23_P338505	-4.58956	-2.19836	4.58956	down	C19orf40	chromosome 19 open reading frame 40	FALSE	Homo sapiens chromosome 19 open reading frame 40 (C19orf40), transcript variant 1, mRNA [NM_152266]	91442	GO:0005515|GO:0006281|GO:0003682|GO:0005654|GO:0003677|GO:0043240|GO:0043231	33465009	chr19	33464453	+	hs|19q13.11	NM_152266	chr19:33464453-33465009	NM_152266	Hs.579899
A_23_P76731	-4.57466	-2.19366	4.57466	down	MOK	MOK protein kinase	FALSE	Homo sapiens MOK protein kinase (MOK), transcript variant 1, mRNA [NM_014226]	5891	GO:0007165|GO:0005737|GO:0004672|GO:0004674|GO:0051726|GO:0006468|GO:0005524|GO:0004693	102695348	chr14	102695289	-	hs|14q32.31	NM_014226	chr14:102695348-102695289	NM_014226	Hs.104119
A_33_P3280801	-4.57135	-2.19262	4.57135	down	LMO7	LIM domain 7	FALSE	Homo sapiens LIM domain 7 (LMO7), transcript variant 1, mRNA [NM_005358]	4008	GO:0005737|GO:0004842|GO:0016567|GO:0023051|GO:0000151|GO:0008270|GO:0005634|GO:0030155|GO:0005925	76430743	chr13	76430684	+	hs|13q22.2	NM_005358	chr13:76430684-76430743	NM_005358	Hs.207631
A_19_P00322208	-4.56618	-2.19099	4.56618	down	LINC01572	long intergenic non-protein coding RNA 1572	FALSE	Homo sapiens long intergenic non-protein coding RNA 1572 (LINC01572), long non-coding RNA [NR_126330]	101927957		72557303	chr16	72557244	-	hs|16q22.2	NR_126330	chr16:72557303-72557244	NR_126330
A_24_P226508	-4.56324	-2.19006	4.56324	down	HS3ST5	heparan sulfate (glucosamine) 3-O-sulfotransferase 5	FALSE	Homo sapiens heparan sulfate (glucosamine) 3-O-sulfotransferase 5 (HS3ST5), mRNA [NM_153612]	222537	GO:0005515|GO:0005975|GO:0008467|GO:0044281|GO:0050656|GO:0006024|GO:0015015|GO:0050819|GO:0000139|GO:0046596|GO:0009405|GO:0006477|GO:0016021|GO:0030203	114378636	chr6	114378577	-	hs|6q21	NM_153612	chr6:114378636-114378577	NM_153612	Hs.645477
A_19_P00809566	-4.56295	-2.18997	4.56295	down			FALSE				124920024	chr11	124919965	+	hs|11q24.2		chr11:124919965-124920024
A_33_P3219641	-4.55667	-2.18798	4.55667	down	CEP78	centrosomal protein 78kDa	FALSE	Homo sapiens centrosomal protein 78kDa (CEP78), transcript variant 1, mRNA [NM_001098802]	84131	GO:0005813|GO:0006996|GO:0000086|GO:0000278|GO:0005829	80881607	chr9	80881548	+	hs|9q21.2	NM_001098802	chr9:80881548-80881607	NM_001098802	Hs.374421
A_23_P389919	-4.54514	-2.18432	4.54514	down	WHSC1	Wolf-Hirschhorn syndrome candidate 1	FALSE	Homo sapiens Wolf-Hirschhorn syndrome candidate 1 (WHSC1), transcript variant 1, mRNA [NM_133330]	7468	GO:2001032|GO:0005515|GO:0003289|GO:0034770|GO:0005694|GO:0048298|GO:0010452|GO:0006325|GO:0005634|GO:0000122|GO:0009653|GO:0003290|GO:0006351|GO:0018024|GO:0043565|GO:0060348|GO:0005737|GO:0003149|GO:0003682|GO:0070201|GO:0005654|GO:0008270	1983605	chr4	1983546	+	hs|4p16.3	NM_133330	chr4:1983546-1983605	NM_133330	Hs.113876
A_33_P3832857	-4.5365	-2.18158	4.5365	down	HAUS2	HAUS augmin-like complex, subunit 2	FALSE	Homo sapiens HAUS augmin-like complex, subunit 2 (HAUS2), transcript variant 1, mRNA [NM_018097]	55142	GO:0005813|GO:0005794|GO:0006996|GO:0005874|GO:0005819|GO:0051225|GO:0005829|GO:0051297|GO:0003674|GO:0005737|GO:0007067|GO:0000086|GO:0070652|GO:0005654|GO:0000278|GO:0051301	42859183	chr15	42859124	+	hs|15q15.2	NM_018097	chr15:42859124-42859183	NM_018097	Hs.14347
A_23_P71644	-4.52955	-2.17937	4.52955	down	FANCG	Fanconi anemia, complementation group G	FALSE	Homo sapiens Fanconi anemia, complementation group G (FANCG), mRNA [NM_004629]	2189	GO:0005515|GO:0009314|GO:0005886|GO:0005730|GO:0007286|GO:0043240|GO:0003684|GO:0005739|GO:0001541|GO:0005737|GO:0006281|GO:0000075|GO:0005654|GO:0007005	35073994	chr9	35073935	-	hs|9p13.3	NM_004629	chr9:35073994-35073935	NM_004629	Hs.591084
A_24_P38895	-4.5258	-2.17817	4.5258	down	H2AFX	H2A histone family, member X	FALSE	Homo sapiens H2A histone family, member X (H2AFX), mRNA [NM_002105]	3014	GO:0005515|GO:0000790|GO:0005657|GO:0005634|GO:0007283|GO:0045739|GO:0006302|GO:0042393|GO:0000724|GO:0010212|GO:0000786|GO:0070062|GO:0001741|GO:0051321|GO:0000794|GO:0000781|GO:0046982|GO:0006334|GO:0035861|GO:0003677|GO:0006974|GO:0003684|GO:0006281|GO:0005654|GO:0000077|GO:0001673|GO:0019899	118964650	chr11	118964591	-	hs|11q23.3	NM_002105	chr11:118964650-118964591	NM_002105	Hs.477879
A_23_P166526	-4.52302	-2.17729	4.52302	down	RIBC2	RIB43A domain with coiled-coils 2	FALSE	Homo sapiens RIB43A domain with coiled-coils 2 (RIBC2), mRNA [NM_015653]	26150	GO:0005515|GO:0005634	45828292	chr22	45828233	+	hs|22q13.31	NM_015653	chr22:45828233-45828292	NM_015653	Hs.475110
A_33_P3257554	-4.5124	-2.1739	4.5124	down	CNTRL	centriolin	FALSE	Homo sapiens centriolin (CNTRL), mRNA [NM_007018]	11064	GO:0005515|GO:0005813|GO:0005737|GO:0006996|GO:0016020|GO:0000086|GO:0000278|GO:0051301|GO:0005829	123920317	chr9	123920261	+	hs|9q33.2	NM_007018	chr9:123920261-123920317	NM_007018	Hs.653263
A_24_P21985	-4.50984	-2.17308	4.50984	down	FOXJ2	forkhead box J2	FALSE	Homo sapiens forkhead box J2 (FOXJ2), mRNA [NM_018416]	55810	GO:0043565|GO:0001077|GO:0045944|GO:0005730|GO:0005634|GO:0045893|GO:0000978|GO:0006351	8207552	chr12	8207493	+	hs|12p13.31	NM_018416	chr12:8207493-8207552	NM_018416	Hs.120844
A_23_P301247	-4.50555	-2.1717	4.50555	down	HIST2H2AC	histone cluster 2, H2ac	FALSE	Homo sapiens histone cluster 2, H2ac (HIST2H2AC), mRNA [NM_003517]	8338	GO:0008150|GO:0003674|GO:0046982|GO:0005634|GO:0000786|GO:0003677|GO:0070062	149858922	chr1	149858863	+	hs|1q21.2	NM_003517	chr1:149858863-149858922	NM_003517	Hs.408067
A_23_P415411	-4.4961	-2.16867	4.4961	down	HIST1H4E	histone cluster 1, H4e	FALSE	Homo sapiens histone cluster 1, H4e (HIST1H4E), mRNA [NM_003545]	8367	GO:0005515|GO:0010467|GO:0006325|GO:0005634|GO:0045653|GO:0000723|GO:0000183|GO:0000786|GO:0070062|GO:0035574|GO:0035575|GO:0046982|GO:0006334|GO:0006335|GO:0005576|GO:0006336|GO:0000228|GO:0003677|GO:0032776|GO:0034080|GO:0043234|GO:0016020|GO:0045814|GO:0040029|GO:0005654|GO:0000278	26205231	chr6	26205172	+	hs|6p22.2	NM_003545	chr6:26205172-26205231	NM_003545	Hs.662174
A_23_P39116	-4.48068	-2.16372	4.48068	down	LIG1	ligase I, DNA, ATP-dependent	FALSE	Homo sapiens ligase I, DNA, ATP-dependent (LIG1), transcript variant 1, mRNA [NM_000234]	3978	GO:0042542|GO:0003909|GO:0005634|GO:0006303|GO:0009653|GO:0046872|GO:0043231|GO:0006302|GO:0005739|GO:0006273|GO:0006271|GO:0000723|GO:0000724|GO:0000722|GO:0006297|GO:0006298|GO:0033151|GO:0005794|GO:0005694|GO:0003910|GO:0006259|GO:0005524|GO:0003677|GO:0006281|GO:0071897|GO:0051103|GO:0006283|GO:0006284|GO:0005654|GO:0006289|GO:0000278|GO:0032201|GO:0051301	48618881	chr19	48618822	-	hs|19q13.33	NM_000234	chr19:48618881-48618822	NM_000234	Hs.1770
A_33_P3395321	-4.46388	-2.1583	4.46388	down	HN1	hematological and neurological expressed 1	FALSE	Homo sapiens hematological and neurological expressed 1 (HN1), transcript variant 2, mRNA [NM_001002032]	51155	GO:0032502|GO:0005634	73143711	chr17	73143652	-	hs|17q25.1	NM_001002032	chr17:73143711-73143652	NM_001002032	Hs.532803
A_33_P3343503	-4.45713	-2.15612	4.45713	down	SAMD4A	sterile alpha motif domain containing 4A	FALSE	Homo sapiens sterile alpha motif domain containing 4A (SAMD4A), transcript variant 2, mRNA [NM_001161576]	23034	GO:0017148|GO:0005737|GO:0030054|GO:0045202|GO:0045727|GO:0030371|GO:0030425	55034444	chr14	55034385	+	hs|14q22.2	NM_001161576	chr14:55034385-55034444	NM_001161576	Hs.98259
A_23_P57306	-4.45552	-2.1556	4.45552	down	CHAF1B	chromatin assembly factor 1, subunit B (p60)	FALSE	Homo sapiens chromatin assembly factor 1, subunit B (p60) (CHAF1B), mRNA [NM_005441]	8208	GO:0000790|GO:0006355|GO:0033186|GO:0006335|GO:0005634|GO:0006351|GO:0005829|GO:0006260|GO:0043234|GO:0042393|GO:0005737|GO:0007049|GO:0006281|GO:0006461|GO:0031497|GO:0003682|GO:0005654|GO:0051082	37789017	chr21	37788958	+	hs|21q22.12	NM_005441	chr21:37788958-37789017	NM_005441	Hs.75238
A_33_P3344229	-4.45282	-2.15472	4.45282	down	HIST1H4A	histone cluster 1, H4a	FALSE	Homo sapiens histone cluster 1, H4a (HIST1H4A), mRNA [NM_003538]	8359	GO:0005515|GO:0010467|GO:0006325|GO:0005634|GO:0045653|GO:0000723|GO:0000183|GO:0000786|GO:0070062|GO:0035574|GO:0035575|GO:0046982|GO:0006334|GO:0006335|GO:0005576|GO:0006336|GO:0000228|GO:0003677|GO:0032776|GO:0034080|GO:0043234|GO:0016020|GO:0045814|GO:0040029|GO:0005654|GO:0000278	26022240	chr6	26022181	+	hs|6p22.2	NM_003538	chr6:26022181-26022240	NM_003538	Hs.248178
A_23_P388146	-4.44286	-2.15149	4.44286	down			FALSE	Homo sapiens zinc finger protein 587, mRNA (cDNA clone IMAGE:4153939), with apparent retained intron. [BC011243]			58379832	chr19	58379773	+	hs|19q13.43	BC011243	chr19:58379773-58379832		Hs.654820
A_23_P149975	-4.4371	-2.14962	4.4371	down	FAM107B	family with sequence similarity 107, member B	FALSE	Homo sapiens family with sequence similarity 107, member B (FAM107B), transcript variant 2, mRNA [NM_031453]	83641	GO:0007605	14561836	chr10	14561777	-	hs|10p13	NM_031453	chr10:14561836-14561777	NM_031453	Hs.446315
A_23_P18196	-4.4363	-2.14936	4.4363	down	RFC4	replication factor C (activator 1) 4, 37kDa	FALSE	Homo sapiens replication factor C (activator 1) 4, 37kDa (RFC4), transcript variant 1, mRNA [NM_002916]	5984	GO:0005515|GO:0003689|GO:0005634|GO:0005524|GO:0006260|GO:0005737|GO:0006271|GO:0006281|GO:0000723|GO:0006283|GO:0000722|GO:0006297|GO:0005654|GO:0005663|GO:0006289|GO:0000278|GO:0032201	186508130	chr3	186508001	-	hs|3q27.3	NM_002916	chr3:186508130-186508001	NM_002916	Hs.732098
A_23_P81392	-4.4292	-2.14705	4.4292	down	WWC1	WW and C2 domain containing 1	FALSE	Homo sapiens WW and C2 domain containing 1 (WWC1), transcript variant 3, mRNA [NM_015238]	23286	GO:0046621|GO:0005515|GO:0048471|GO:0032386|GO:0003713|GO:0005634|GO:0030010|GO:0032587|GO:0035329|GO:0000122|GO:0006351|GO:0005829|GO:0035330|GO:0043234|GO:0035331|GO:0032947|GO:0005737|GO:0016477|GO:0043410|GO:0019900|GO:0030674	167896186	chr5	167896127	+	hs|5q34	NM_015238	chr5:167896127-167896186	NM_015238	Hs.484047
A_24_P32215	-4.41596	-2.14273	4.41596	down			FALSE	ADP-ribosylation factor-like 4 pseudogene [Source:HGNC Symbol;Acc:HGNC:17741] [ENST00000503220]			62444693	chr10	62444634	+	hs|10q21.2		chr10:62444634-62444693
A_19_P00322749	-4.41069	-2.141	4.41069	down	DLEU2	deleted in lymphocytic leukemia 2 (non-protein coding)	FALSE	Homo sapiens full length insert cDNA YR33G07. [AF075100]	8847		50613518	chr13	50613459	-	hs|13q14.2	AF075100	chr13:50613518-50613459		Hs.547964
A_23_P16992	-4.40819	-2.14019	4.40819	down	PKP4	plakophilin 4	FALSE	Homo sapiens plakophilin 4 (PKP4), transcript variant 1, mRNA [NM_003628]	8502	GO:0005515|GO:0030057|GO:0072686|GO:0048471|GO:0005886|GO:0032467|GO:0044291|GO:0007267|GO:0030496|GO:0014069|GO:0051233|GO:0030155|GO:0000922|GO:0005737|GO:0016337|GO:0032321|GO:0005911|GO:0007043|GO:0009898|GO:0005856	159537292	chr2	159537233	+	hs|2q24.1	NM_003628	chr2:159537233-159537292	NM_003628	Hs.407580
A_33_P3325808	-4.40495	-2.13912	4.40495	down			FALSE	tubulin, beta 3 class III pseudogene 2 [Source:HGNC Symbol;Acc:HGNC:42181] [ENST00000480063]			134419765	chr7	134419706	-	hs|7q33		chr7:134419765-134419706
A_23_P124733	-4.40231	-2.13826	4.40231	down	COQ2	coenzyme Q2 4-hydroxybenzoate polyprenyltransferase	FALSE	Homo sapiens coenzyme Q2 4-hydroxybenzoate polyprenyltransferase (COQ2), mRNA [NM_015697]	27235	GO:0006744|GO:0047293|GO:0005743|GO:0044281|GO:0016021|GO:0008299|GO:0006071|GO:0002083	84193253	chr4	84191101	-	hs|4q21.23	NM_015697	chr4:84193253-84191101	NM_015697	Hs.729069
A_23_P379475	-4.38887	-2.13385	4.38887	down	DHCR24	24-dehydrocholesterol reductase	FALSE	Homo sapiens 24-dehydrocholesterol reductase (DHCR24), mRNA [NM_014762]	1718	GO:0006695|GO:0008285|GO:0008762|GO:0005783|GO:0050660|GO:0007265|GO:0005634|GO:0044281|GO:0016628|GO:0005829|GO:0030539|GO:0008104|GO:0050614|GO:0042605|GO:0009888|GO:0061024|GO:0007050|GO:0009725|GO:0043154|GO:0005856|GO:0006979|GO:0042987|GO:0043066|GO:0000246|GO:0006915|GO:0000139|GO:0016020|GO:0005789|GO:0031639|GO:0043588|GO:0016021|GO:0019899|GO:0055114	55315569	chr1	55315510	-	hs|1p32.3	NM_014762	chr1:55315569-55315510	NM_014762	Hs.498727
A_33_P3695548	-4.37116	-2.12802	4.37116	down	POLE	polymerase (DNA directed), epsilon, catalytic subunit	FALSE	Homo sapiens polymerase (DNA directed), epsilon, catalytic subunit (POLE), mRNA [NM_006231]	5426	GO:0008622|GO:0005886|GO:0003887|GO:0005634|GO:0005737|GO:0000082|GO:0000723|GO:0000166|GO:0006270|GO:0000722|GO:0006297|GO:0051539|GO:0003677|GO:0001701|GO:0006260|GO:0006281|GO:0006283|GO:0003682|GO:0000731|GO:0006287|GO:0005654|GO:0008270|GO:0006289|GO:0000278|GO:0032201	133202291	chr12	133202232	-	hs|12q24.33	NM_006231	chr12:133202291-133202232	NM_006231	Hs.524871
A_33_P3281283	-4.3601	-2.12436	4.3601	down	S1PR3	sphingosine-1-phosphate receptor 3	FALSE	Homo sapiens sphingosine-1-phosphate receptor 3 (S1PR3), mRNA [NM_005226]	1903	GO:0008284|GO:0005886|GO:0004930|GO:0003376|GO:0001816|GO:0038036|GO:0007193|GO:0007204|GO:0009653|GO:0008289|GO:0005178|GO:0006954|GO:0007186|GO:0005887|GO:0032651	91619873	chr9	91619814	+	hs|9q22.1	NM_005226	chr9:91619814-91619873	NM_005226	Hs.585118
A_23_P104372	-4.35648	-2.12316	4.35648	down	DNAJC9	DnaJ (Hsp40) homolog, subfamily C, member 9	FALSE	Homo sapiens DnaJ (Hsp40) homolog, subfamily C, member 9 (DNAJC9), mRNA [NM_015190]	23234	GO:0035176|GO:0005634	75002733	chr10	75002674	-	hs|10q22.2	NM_015190	chr10:75002733-75002674	NM_015190	Hs.732485
A_23_P419696	-4.34821	-2.12042	4.34821	down	LYPD1	LY6/PLAUR domain containing 1	FALSE	Homo sapiens LY6/PLAUR domain containing 1 (LYPD1), transcript variant 1, mRNA [NM_144586]	116372	GO:0005886|GO:0031225	133403458	chr2	133403399	-	hs|2q21.2	NM_144586	chr2:133403458-133403399	NM_144586	Hs.432395
A_23_P38328	-4.34713	-2.12006	4.34713	down	DBF4B	DBF4 zinc finger B	FALSE	DBF4 zinc finger B [Source:HGNC Symbol;Acc:HGNC:17883] [ENST00000528353]	80174	GO:0000790|GO:0008284|GO:0016235|GO:0019901|GO:0005634|GO:0030295|GO:0003676|GO:0043231|GO:0005737|GO:0007049|GO:0010971|GO:0010571|GO:0045860|GO:0005654|GO:0008270	42809670	chr17	42809611	+	hs|17q21.31	AK023149	chr17:42809611-42809670
A_33_P3260614	-4.33701	-2.1167	4.33701	down	PLCB2	phospholipase C, beta 2	FALSE	Homo sapiens phospholipase C, beta 2 (PLCB2), transcript variant 1, mRNA [NM_004573]	5330	GO:0043647|GO:0005509|GO:0007268|GO:0007202|GO:0044281|GO:0005829|GO:0016042|GO:0035556|GO:0004629|GO:0050913|GO:0004435|GO:0008152|GO:0004871|GO:0006644	40580198	chr15	40580139	-	hs|15q15.1	NM_004573	chr15:40580198-40580139	NM_004573	Hs.355888
A_23_P106391	-4.33278	-2.11529	4.33278	down	THAP10	THAP domain containing 10	FALSE	Homo sapiens THAP domain containing 10 (THAP10), mRNA [NM_020147]	56906	GO:0003677|GO:0046872	71173920	chr15	71173861	-	hs|15q23	NM_020147	chr15:71173920-71173861	NM_020147	Hs.591123
A_33_P3257568	-4.33268	-2.11526	4.33268	down	CNTRL	centriolin	FALSE	centriolin [Source:HGNC Symbol;Acc:HGNC:1858] [ENST00000373851]	11064	GO:0005515|GO:0005813|GO:0005737|GO:0006996|GO:0016020|GO:0000086|GO:0000278|GO:0051301|GO:0005829	123912922	chr9	123912863	+	hs|9q33.2	AK097636	chr9:123912863-123912922		Hs.653263
A_23_P60016	-4.30557	-2.1062	4.30557	down	PTTG3P	pituitary tumor-transforming 3, pseudogene	FALSE	Homo sapiens pituitary tumor-transforming 3, pseudogene (PTTG3P), non-coding RNA [NR_002734]	26255	GO:0051276|GO:0017124|GO:0005737|GO:0005634	67680130	chr8	67680071	-	hs|8q13.1	NR_002734	chr8:67680130-67680071	NR_002734	Hs.647156
A_24_P24685	-4.30541	-2.10615	4.30541	down			FALSE	high mobility group box 3 pseudogene 22 [Source:HGNC Symbol;Acc:HGNC:39314] [ENST00000451823]			179121337	chr5	179121278	+	hs|5q35.3		chr5:179121278-179121337
A_33_P3237874	-4.30348	-2.10551	4.30348	down	TROAP	trophinin associated protein	FALSE	Homo sapiens trophinin associated protein (TROAP), transcript variant 2, mRNA [NM_001100620]	10024	GO:0005515|GO:0005737|GO:0007155	49718007	chr12	49717948	+	hs|12q13.12	NM_001100620	chr12:49717948-49718007	NM_001100620	Hs.524399
A_33_P3367361	-4.29241	-2.10179	4.29241	down	FAM107B	family with sequence similarity 107, member B	FALSE	Homo sapiens family with sequence similarity 107, member B (FAM107B), transcript variant 1, mRNA [NM_001282695]	83641	GO:0007605	14560784	chr10	14560725	-	hs|10p13	NM_001282695	chr10:14560784-14560725	NM_001282695	Hs.446315
A_33_P3286953	-4.28312	-2.09866	4.28312	down	ADAMTS6	ADAM metallopeptidase with thrombospondin type 1 motif, 6	FALSE	Homo sapiens ADAM metallopeptidase with thrombospondin type 1 motif, 6 (ADAMTS6), mRNA [NM_197941]	11174	GO:0006508|GO:0005578|GO:0008270|GO:0004222|GO:0008237	64447414	chr5	64447355	-	hs|5q12.3	NM_197941	chr5:64447414-64447355	NM_197941	Hs.482291
A_23_P139547	-4.2828	-2.09856	4.2828	down	TUBA1A	tubulin, alpha 1a	FALSE	Homo sapiens tubulin, alpha 1a (TUBA1A), transcript variant 1, mRNA [NM_006009]	7846	GO:0005515|GO:0005881|GO:0051258|GO:0006996|GO:0019904|GO:0005874|GO:0003924|GO:0005634|GO:0005525|GO:0005829|GO:0030705|GO:0006184|GO:0005198|GO:0006457|GO:0000086|GO:0005200|GO:0051084|GO:0055037|GO:0007017|GO:0000278|GO:0044267|GO:0070062|GO:0051301	49579472	chr12	49579413	-	hs|12q13.12	NM_006009	chr12:49579472-49579413	NM_006009	Hs.654422
A_24_P53519	-4.2611	-2.09123	4.2611	down	CHAF1A	chromatin assembly factor 1, subunit A (p150)	FALSE	Homo sapiens chromatin assembly factor 1, subunit A (p150) (CHAF1A), mRNA [NM_005483]	10036	GO:0005515|GO:0000790|GO:0006355|GO:0033186|GO:0070087|GO:0006335|GO:0006351|GO:0042802|GO:0006260|GO:0043234|GO:0007049|GO:0006281|GO:0006461|GO:0031497|GO:0003682|GO:0051082	4443199	chr19	4443140	+	hs|19p13.3	NM_005483	chr19:4443140-4443199	NM_005483	Hs.79018
A_19_P00804825	-4.2533	-2.08858	4.2533	down	LINC01279	long intergenic non-protein coding RNA 1279	FALSE	Homo sapiens long intergenic non-protein coding RNA 1279 (LINC01279), long non-coding RNA [NR_109779]	100506621		112316289	chr3	112316230	-	hs|3q13.2	NR_109779	chr3:112316289-112316230	NR_109779
A_33_P3249354	-4.25322	-2.08855	4.25322	down	SPDL1	spindle apparatus coiled-coil protein 1	FALSE	Homo sapiens spindle apparatus coiled-coil protein 1 (SPDL1), mRNA [NM_017785]	54908	GO:0005515|GO:0031577|GO:0005815|GO:0034501|GO:0000132|GO:0005634|GO:0005829|GO:0000922|GO:0000940|GO:0043515|GO:0007080|GO:0000278|GO:0019899|GO:0051301	169031205	chr5	169031146	+	hs|5q35.1	NM_017785	chr5:169031146-169031205	NM_017785	Hs.368710
A_19_P00322705	-4.252	-2.08814	4.252	down	MIAT	myocardial infarction associated transcript (non-protein coding)	FALSE	Homo sapiens myocardial infarction associated transcript (non-protein coding) (MIAT), transcript variant 1, long non-coding RNA [NR_003491]	440823		27064371	chr22	27064312	+	hs|22q12.1	NR_003491	chr22:27064312-27064371	NR_003491	Hs.517502
A_33_P3288219	-4.25013	-2.08751	4.25013	down			FALSE	Homo sapiens cDNA FLJ45684 fis, clone FCBBF3005160. [AK127589]			644430	chr19	644371	-	hs|19p13.3	AK127589	chr19:644430-644371
A_32_P200238	-4.24924	-2.08721	4.24924	down	UCA1	urothelial cancer associated 1 (non-protein coding)	FALSE	Homo sapiens urothelial cancer associated 1 (non-protein coding) (UCA1), long non-coding RNA [NR_015379]	652995		15946092	chr19	15946035	+	hs|19p13.12	NR_015379	chr19:15946035-15946092	NR_015379	Hs.644234
A_33_P3355821	-4.24409	-2.08546	4.24409	down	ZNF273	zinc finger protein 273	FALSE	Homo sapiens zinc finger protein 273 (ZNF273), transcript variant 1, mRNA [NM_021148]	10793	GO:0006355|GO:0005634|GO:0003677|GO:0046872|GO:0006351	64391788	chr7	64391729	+	hs|7q11.21	NM_021148	chr7:64391729-64391788	NM_021148	Hs.520889
A_32_P72341	-4.23892	-2.0837	4.23892	down	TRIM59	tripartite motif containing 59	FALSE	Homo sapiens tripartite motif containing 59 (TRIM59), mRNA [NM_173084]	286827	GO:0005622|GO:0008270|GO:0016021|GO:0043124	160153585	chr3	160153526	-	hs|3q25.33	NM_173084	chr3:160153585-160153526	NM_173084	Hs.212957
A_23_P368779	-4.23741	-2.08318	4.23741	down	ZNF114	zinc finger protein 114	FALSE	Homo sapiens zinc finger protein 114 (ZNF114), transcript variant 1, mRNA [NM_153608]	163071	GO:0008150|GO:0003674|GO:0006355|GO:0005634|GO:0003677|GO:0046872|GO:0006351|GO:0070062	48790213	chr19	48790154	+	hs|19q13.33	NM_153608	chr19:48790154-48790213	NM_153608	Hs.511883
A_33_P3399943	-4.22905	-2.08033	4.22905	down	RPS6KA2	ribosomal protein S6 kinase, 90kDa, polypeptide 2	FALSE	Homo sapiens ribosomal protein S6 kinase, 90kDa, polypeptide 2 (RPS6KA2), transcript variant 1, mRNA [NM_021135]	6196	GO:0005515|GO:0060047|GO:0034142|GO:0008285|GO:0070613|GO:0007268|GO:0005634|GO:0001556|GO:0051403|GO:0005829|GO:0035556|GO:0007507|GO:0002756|GO:0005737|GO:0018105|GO:0007411|GO:0002755|GO:0034138|GO:0048011|GO:0031965|GO:0043065|GO:0038124|GO:0000287|GO:0038123|GO:0034134|GO:0005819|GO:0002035|GO:0045786|GO:0002224|GO:0005524|GO:0010628|GO:0007165|GO:0004674|GO:0045087|GO:0010659|GO:0004711|GO:…	166912124	chr6	166912065	-	hs|6q27	NM_021135	chr6:166912124-166912065	NM_021135	Hs.655277
A_24_P157156	-4.22657	-2.07949	4.22657	down	CCDC150	coiled-coil domain containing 150	FALSE	Homo sapiens coiled-coil domain containing 150 (CCDC150), mRNA [NM_001080539]	284992		197590794	chr2	197590735	+	hs|2q33.1	NM_001080539	chr2:197590735-197590794	NM_001080539	Hs.132519
A_24_P277673	-4.21984	-2.07719	4.21984	down	HIST1H4G	histone cluster 1, H4g	FALSE	Homo sapiens histone cluster 1, H4g (HIST1H4G), mRNA [NM_003547]	8369	GO:0008150|GO:0003674|GO:0046982|GO:0005634|GO:0000786|GO:0003677	26247146	chr6	26247087	-	hs|6p22.2	NM_003547	chr6:26247146-26247087	NM_003547	Hs.553507
A_24_P287826	-4.21888	-2.07686	4.21888	down	RFWD3	ring finger and WD repeat domain 3	FALSE	Homo sapiens ring finger and WD repeat domain 3 (RFWD3), mRNA [NM_018124]	55159	GO:0005515|GO:0004842|GO:0016567|GO:0016874|GO:2000001|GO:0035861|GO:0005634|GO:0002039|GO:0005737|GO:0006281|GO:0010212|GO:0016605|GO:0008270|GO:0031571	74655967	chr16	74655908	-	hs|16q23.1	NM_018124	chr16:74655967-74655908	NM_018124	Hs.567525
A_19_P00808361	-4.21689	-2.07618	4.21689	down	TMEM194B	transmembrane protein 194B	FALSE	transmembrane protein 194B [Source:HGNC Symbol;Acc:HGNC:33700] [ENST00000409150]	100131211	GO:0016021	191371329	chr2	191371270	-	hs|2q32.2		chr2:191371329-191371270
A_19_P00321556	-4.20892	-2.07345	4.20892	down	LINC01204	long intergenic non-protein coding RNA 1204	FALSE	Homo sapiens long intergenic non-protein coding RNA 1204 (LINC01204), transcript variant 2, long non-coding RNA [NR_104645]	101927528		45381448	chrX	45381389	+	hs|Xp11.3		chrX:45381389-45381448	NR_104645	Hs.550772
A_24_P253251	-4.20149	-2.0709	4.20149	down	SLC7A1	solute carrier family 7 (cationic amino acid transporter, y+ system), member 1	FALSE	Homo sapiens solute carrier family 7 (cationic amino acid transporter, y+ system), member 1 (SLC7A1), mRNA [NM_003045]	6541	GO:0016020|GO:0005886|GO:0005887|GO:0015181|GO:0006865|GO:0006810|GO:0015809|GO:0055085|GO:0003333|GO:0006811	30084152	chr13	30084093	-	hs|13q12.3	NM_003045	chr13:30084152-30084093	NM_003045	Hs.14846
A_23_P251421	-4.1959	-2.06898	4.1959	down	CDCA7	cell division cycle associated 7	FALSE	Homo sapiens cell division cycle associated 7 (CDCA7), transcript variant 1, mRNA [NM_031942]	83879	GO:0006355|GO:0005737|GO:0042127|GO:0006915|GO:0005654|GO:0005634|GO:0006351	174233549	chr2	174233490	+	hs|2q31.1	NM_031942	chr2:174233490-174233549	NM_031942	Hs.470654
A_23_P71727	-4.194	-2.06833	4.194	down	CKS2	CDC28 protein kinase regulatory subunit 2	FALSE	Homo sapiens CDC28 protein kinase regulatory subunit 2 (CKS2), mRNA [NM_001827]	1164	GO:0007127|GO:0008283|GO:0016538|GO:0000079|GO:0051301	91931582	chr9	91931523	+	hs|9q22.2	NM_001827	chr9:91931523-91931582	NM_001827	Hs.83758
A_33_P3229672	-4.17753	-2.06265	4.17753	down			FALSE	Q4SEQ2_TETNG (Q4SEQ2) Chromosome 3 SCAF14614, whole genome shotgun sequence. (Fragment), partial (28%) [THC2651904]			154277068	chr2	154277009	-	hs|2q23.3		chr2:154277068-154277009
A_33_P3265624	-4.1723	-2.06084	4.1723	down			FALSE				20383215	chr22	20383156	-	hs|22q11.21		chr22:020383215-020383156
A_23_P67725	-4.17115	-2.06045	4.17115	down	LMNB2	lamin B2	FALSE	Homo sapiens lamin B2 (LMNB2), mRNA [NM_032737]	84823	GO:0008150|GO:0003674|GO:0005198|GO:0005637|GO:0005638	2428242	chr19	2428183	-	hs|19p13.3	NM_032737	chr19:2428242-2428183	NM_032737	Hs.538286
A_23_P387057	-4.16866	-2.05958	4.16866	down	TUBB	tubulin, beta class I	FALSE	Homo sapiens tubulin, beta class I (TUBB), transcript variant 2, mRNA [NM_178014]	203068	GO:0005515|GO:0051258|GO:0042288|GO:0042267|GO:0003924|GO:0006928|GO:0005634|GO:0032403|GO:0005829|GO:0000086|GO:0005641|GO:0005856|GO:0007017|GO:0031625|GO:0070062|GO:0006996|GO:0009987|GO:0005874|GO:0019904|GO:0005525|GO:0051225|GO:0044297|GO:0006184|GO:0030705|GO:0032794|GO:0005198|GO:0005200|GO:0000278|GO:0051301	30692581	chr6	30692522	+	hs|6p21.33	NM_178014	chr6:30692522-30692581	NM_178014	Hs.636480
A_24_P923251	-4.16864	-2.05958	4.16864	down	TGM2	transglutaminase 2	FALSE	Homo sapiens transglutaminase 2 (TGM2), transcript variant 2, mRNA [NM_198951]	7052	GO:0005515|GO:0043065|GO:0005886|GO:0019904|GO:0043277|GO:0005525|GO:0048661|GO:0046872|GO:0045785|GO:0005829|GO:0005739|GO:0051561|GO:0001974|GO:0051482|GO:0003810|GO:0050729|GO:0051260|GO:0018153|GO:0060662|GO:0043123|GO:0005925|GO:0032471|GO:0070062|GO:0060445	36766505	chr20	36766446	-	hs|20q11.23	NM_198951	chr20:36766505-36766446	NM_198951	Hs.517033
A_33_P3846653	-4.16539	-2.05845	4.16539	down	KRT19P2	keratin 19 pseudogene 2	FALSE	Homo sapiens keratin 19 pseudogene 2 (KRT19P2), non-coding RNA [NR_036685]	160313		95228795	chr12	95228736	+	hs|12q22	NR_036685	chr12:95228736-95228795	NR_036685	Hs.527883
A_24_P177585	-4.15247	-2.05397	4.15247	down	GEN1	GEN1 Holliday junction 5' flap endonuclease	FALSE	Homo sapiens GEN1 Holliday junction 5' flap endonuclease (GEN1), transcript variant 1, mRNA [NM_182625]	348654	GO:0005813|GO:0071140|GO:0000724|GO:0071139|GO:0008821|GO:0005634|GO:0090267|GO:0010824|GO:0003677|GO:0000737|GO:0046872|GO:0070062	17963139	chr2	17963080	+	hs|2p24.2	NM_182625	chr2:17963080-17963139	NM_182625	Hs.467793
A_23_P397341	-4.14553	-2.05156	4.14553	down	PAQR4	progestin and adipoQ receptor family member IV	FALSE	Homo sapiens progestin and adipoQ receptor family member IV (PAQR4), transcript variant 1, mRNA [NM_152341]	124222	GO:0004872|GO:0016021	3022845	chr16	3022786	+	hs|16p13.3	NM_152341	chr16:3022786-3022845	NM_152341	Hs.351474
A_33_P3301876	-4.13983	-2.04957	4.13983	down			FALSE				240321637	chr2	240321578	-	hs|2q37.3		chr2:240321637-240321578
A_19_P00810855	-4.13565	-2.04811	4.13565	down			FALSE				1175775	chr5	1175716	+	hs|5p15.33		chr5:001175716-001175775
A_24_P941322	-4.12944	-2.04595	4.12944	down	QKI	QKI, KH domain containing, RNA binding	FALSE	Homo sapiens QKI, KH domain containing, RNA binding (QKI), transcript variant 1, mRNA [NM_006775]	9444	GO:0005515|GO:0006397|GO:0008380|GO:0017124|GO:0042552|GO:0007286|GO:0005634|GO:0003729|GO:0006417|GO:0010628|GO:0042692|GO:0061158|GO:0005737|GO:0042759|GO:0051028|GO:0001570	163994565	chr6	163994506	+	hs|6q26	NM_006775	chr6:163994506-163994565	NM_006775	Hs.510324
A_32_P103633	-4.1231	-2.04373	4.1231	down	MCM2	minichromosome maintenance complex component 2	FALSE	Homo sapiens minichromosome maintenance complex component 2 (MCM2), transcript variant 1, mRNA [NM_004526]	4171	GO:0005515|GO:0042555|GO:0006334|GO:0005634|GO:0003688|GO:0003677|GO:0005524|GO:0046872|GO:0003678|GO:0006260|GO:0042393|GO:0007049|GO:0006271|GO:0000082|GO:0005737|GO:0006270|GO:0015630|GO:0006268|GO:0071353|GO:0005654|GO:0005664|GO:0000278|GO:0000785	127340864	chr3	127340805	+	hs|3q21.3	NM_004526	chr3:127340805-127340864	NM_004526	Hs.477481
A_33_P3296807	-4.12291	-2.04366	4.12291	down	HDAC8	histone deacetylase 8	FALSE	Homo sapiens histone deacetylase 8 (HDAC8), transcript variant 3, mRNA [NM_001166419]	55869	GO:0032041|GO:0070932|GO:0070933|GO:0005886|GO:0006325|GO:0046970|GO:0005634|GO:0071922|GO:0000122|GO:0000228|GO:0046872|GO:0006351|GO:0005829|GO:0006333|GO:0005737|GO:0000118|GO:0007062|GO:0005654|GO:0004407|GO:0000278|GO:0046969|GO:0016568|GO:0008134	71694495	chrX	71694436	-	hs|Xq13.1	NM_001166419	chrX:71694495-71694436	NM_001166419	Hs.310536
A_23_P93690	-4.1228	-2.04362	4.1228	down	MCM7	minichromosome maintenance complex component 7	FALSE	Homo sapiens minichromosome maintenance complex component 7 (MCM7), transcript variant 2, mRNA [NM_182776]	4176	GO:0005515|GO:0042555|GO:0008283|GO:0042493|GO:0003677|GO:0005524|GO:0006974|GO:0005829|GO:0006260|GO:0042325|GO:0006271|GO:0000082|GO:0005737|GO:0004003|GO:0016020|GO:0003697|GO:0071364|GO:0006270|GO:0006268|GO:0005654|GO:0000278|GO:0000785	99690579	chr7	99690520	-	hs|7q22.1	NM_182776	chr7:99690579-99690520	NM_182776	Hs.438720
A_23_P425502	-4.12163	-2.04322	4.12163	down	DONSON	downstream neighbor of SON	FALSE	Homo sapiens downstream neighbor of SON (DONSON), mRNA [NM_017613]	29980	GO:0008150|GO:0003674|GO:0007275|GO:0005634|GO:0005575	34950584	chr21	34950525	-	hs|21q22.11	NM_017613	chr21:34950584-34950525	NM_017613	Hs.436341
A_23_P141447	-4.11909	-2.04233	4.11909	down	RDM1	RAD52 motif containing 1	FALSE	Homo sapiens RAD52 motif containing 1 (RDM1), transcript variant 2, mRNA [NM_001034836]	201299	GO:0005737|GO:0015030|GO:0006281|GO:0000166|GO:0016605|GO:0003723|GO:0005730|GO:0006310|GO:0003677	34249654	chr17	34249595	-	hs|17q12	NM_001034836	chr17:34249654-34249595	NM_001034836	Hs.194411
A_33_P3288942	-4.11527	-2.04099	4.11527	down	FAM107B	family with sequence similarity 107, member B	FALSE	Homo sapiens family with sequence similarity 107, member B (FAM107B), transcript variant 1, mRNA [NM_001282695]	83641	GO:0007605	14572391	chr10	14572332	-	hs|10p13	NM_001282695	chr10:14572391-14572332	NM_001282695	Hs.446315
A_33_P3301394	-4.1111	-2.03952	4.1111	down			FALSE	high mobility group nucleosomal binding domain 2 pseudogene 25 [Source:HGNC Symbol;Acc:HGNC:39392] [ENST00000486956]			141584094	chr3	141584035	-	hs|3q23		chr3:141584094-141584035
A_23_P118150	-4.10871	-2.03868	4.10871	down	ARL6IP1	ADP-ribosylation factor-like 6 interacting protein 1	FALSE	Homo sapiens ADP-ribosylation factor-like 6 interacting protein 1 (ARL6IP1), mRNA [NM_015161]	23204	GO:0005515|GO:0005784|GO:0016020|GO:0006613|GO:0016021|GO:0005829	18803812	chr16	18803753	-	hs|16p12.3	NM_015161	chr16:18803812-18803753	NM_015161	Hs.634882
A_23_P53891	-4.10834	-2.03855	4.10834	down	KLF5	Kruppel-like factor 5 (intestinal)	FALSE	Homo sapiens Kruppel-like factor 5 (intestinal) (KLF5), transcript variant 1, mRNA [NM_001730]	688	GO:0060576|GO:0005515|GO:0008284|GO:0005794|GO:0005886|GO:0006366|GO:0030033|GO:0032534|GO:0000122|GO:0001525|GO:0035914|GO:0000978|GO:0046872|GO:0043231|GO:0071407|GO:0001077|GO:0005737|GO:0045944|GO:0045600|GO:0005654	73651038	chr13	73650979	+	hs|13q22.1	NM_001730	chr13:73650979-73651038	NM_001730	Hs.508234
A_33_P3235905	-4.10179	-2.03626	4.10179	down			FALSE	PREDICTED: Homo sapiens uncharacterized LOC100996374 (LOC100996374), misc_RNA [XR_159295]			73072618	chr17	73072559	+	hs|17q25.1	XR_159295	chr17:73072559-73072618		Hs.741930
A_33_P3406939	-4.09775	-2.03483	4.09775	down	KIF24	kinesin family member 24	FALSE	Homo sapiens kinesin family member 24 (KIF24), mRNA [NM_194313]	347240	GO:0005515|GO:0008017|GO:0005871|GO:0006996|GO:0005814|GO:0005874|GO:0003777|GO:0005524|GO:0005829|GO:0043234|GO:0042384|GO:0008152|GO:0016887|GO:0007019|GO:0007018	34252568	chr9	34252509	-	hs|9p13.3	NM_194313	chr9:34252568-34252509	NM_194313	Hs.710246
A_23_P25873	-4.09231	-2.03292	4.09231	down	WDHD1	WD repeat and HMG-box DNA binding protein 1	FALSE	Homo sapiens WD repeat and HMG-box DNA binding protein 1 (WDHD1), transcript variant 1, mRNA [NM_007086]	11169	GO:0005515|GO:0006396|GO:0005737|GO:0070829|GO:0003723|GO:0003682|GO:0005654|GO:0070063|GO:0003677|GO:0000775|GO:0033044	55408024	chr14	55407965	-	hs|14q22.2	NM_007086	chr14:55408024-55407965	NM_007086	Hs.385998
A_23_P76761	-4.09145	-2.03261	4.09145	down	VRK1	vaccinia related kinase 1	FALSE	Homo sapiens vaccinia related kinase 1 (VRK1), mRNA [NM_003384]	7443	GO:0005515|GO:0007077|GO:0008360|GO:0005634|GO:0090166|GO:0005829|GO:0005737|GO:0046777|GO:0016055|GO:0005795|GO:0007084|GO:0005819|GO:0005730|GO:0031493|GO:0005524|GO:0006897|GO:0035175|GO:0072354|GO:0007067|GO:0072355|GO:0004672|GO:0004674|GO:0043987|GO:0006468|GO:0005654|GO:0000278|GO:0051301	97347648	chr14	97347589	+	hs|14q32.2	NM_003384	chr14:97347589-97347648	NM_003384	Hs.422662
A_23_P107421	-4.08938	-2.03188	4.08938	down	TK1	thymidine kinase 1, soluble	FALSE	Homo sapiens thymidine kinase 1, soluble (TK1), mRNA [NM_003258]	7083	GO:0046104|GO:0043097|GO:0044281|GO:0019206|GO:0009165|GO:0005829|GO:0042802|GO:0051289|GO:0014856|GO:0031667|GO:0009157|GO:0009636|GO:0048565|GO:0055086|GO:0060138|GO:0005524|GO:0051414|GO:0001889|GO:0016310|GO:0006139|GO:0071897|GO:0008270|GO:0046688|GO:0006206|GO:0004797	76170252	chr17	76170193	-	hs|17q25.3	NM_003258	chr17:76170252-76170193	NM_003258	Hs.515122
A_23_P29594	-4.08439	-2.03012	4.08439	down	RPL39L	ribosomal protein L39-like	FALSE	Homo sapiens ribosomal protein L39-like (RPL39L), mRNA [NM_052969]	116832	GO:0003735|GO:0022625|GO:0007283|GO:0006412	186845840	chr3	186839111	-	hs|3q27.3	NM_052969	chr3:186845840-186839111	NM_052969	Hs.647900
A_24_P334456	-4.0809	-2.02889	4.0809	down	ADAMTS6	ADAM metallopeptidase with thrombospondin type 1 motif, 6	FALSE	Homo sapiens ADAM metallopeptidase with thrombospondin type 1 motif, 6 (ADAMTS6), mRNA [NM_197941]	11174	GO:0006508|GO:0005578|GO:0008270|GO:0004222|GO:0008237	64510747	chr5	64510688	-	hs|5q12.3	NM_197941	chr5:64510747-64510688	NM_197941	Hs.482291
A_23_P96209	-4.07031	-2.02514	4.07031	down	REEP4	receptor accessory protein 4	FALSE	Homo sapiens receptor accessory protein 4 (REEP4), mRNA [NM_025232]	80346	GO:0008017|GO:0007067|GO:0005783|GO:0007084|GO:0005874|GO:0005789|GO:0006998|GO:0016021|GO:0051301	21995837	chr8	21995778	-	hs|8p21.3	NM_025232	chr8:21995837-21995778	NM_025232	Hs.289063
A_23_P89762	-4.06975	-2.02494	4.06975	down	PHLPP1	PH domain and leucine rich repeat protein phosphatase 1	FALSE	Homo sapiens PH domain and leucine rich repeat protein phosphatase 1 (PHLPP1), mRNA [NM_194449]	23239	GO:0005515|GO:0048011|GO:0048015|GO:0006915|GO:0005634|GO:0046872|GO:0005829|GO:0007173|GO:0016020|GO:0008543|GO:0009649|GO:0016311|GO:0045087|GO:0004721|GO:0038095	60647239	chr18	60647180	+	hs|18q21.33	NM_194449	chr18:60647180-60647239	NM_194449	Hs.465337
A_33_P3289005	-4.06818	-2.02438	4.06818	down	AP1S3	adaptor-related protein complex 1, sigma 3 subunit	FALSE	Homo sapiens adaptor-related protein complex 1, sigma 3 subunit (AP1S3), transcript variant 1, mRNA [NM_001039569]	130340	GO:0006892|GO:0006605|GO:0005765|GO:0032588|GO:0030117|GO:0005829|GO:0050690|GO:0019886|GO:0005905|GO:0000139|GO:0008565|GO:0061024|GO:0016032|GO:0030659	224629990	chr2	224629931	-	hs|2q36.1	NM_001039569	chr2:224629990-224629931	NM_001039569	Hs.632555
A_33_P3407937	-4.068	-2.02432	4.068	down	PLCXD1	phosphatidylinositol-specific phospholipase C, X domain containing 1	FALSE	Homo sapiens phosphatidylinositol-specific phospholipase C, X domain containing 1 (PLCXD1), transcript variant 1, mRNA [NM_018390]	55344	GO:0006629|GO:0008081	208319	chrX	208260	+	hs|Xp22.33	NM_018390	chrX:208260-208319	NM_018390	Hs.522568
A_32_P1701	-4.06799	-2.02432	4.06799	down	POLA1	polymerase (DNA directed), alpha 1, catalytic subunit	FALSE	Homo sapiens polymerase (DNA directed), alpha 1, catalytic subunit (POLA1), mRNA [NM_016937]	5422	GO:0005515|GO:0008283|GO:0005658|GO:0003887|GO:0005634|GO:0005635|GO:0006303|GO:0046872|GO:0016363|GO:0006273|GO:0000082|GO:0005737|GO:0006271|GO:0000083|GO:0006272|GO:0000723|GO:0000166|GO:0001882|GO:0006270|GO:0000722|GO:0016032|GO:0000785|GO:0051539|GO:0046982|GO:0019901|GO:0003896|GO:0005730|GO:0003677|GO:0006260|GO:0006281|GO:0071897|GO:0003682|GO:0000731|GO:0006269|GO:0005654|GO:0000278|GO:…	25014962	chrX	25014903	+	hs|Xp21.3	NM_016937	chrX:25014903-25014962	NM_016937	Hs.567319
A_33_P3349840	-4.06781	-2.02425	4.06781	down			FALSE	high mobility group nucleosomal binding domain 2 pseudogene 20 [Source:HGNC Symbol;Acc:HGNC:39385] [ENST00000437531]			24553529	chr2	24553470	+	hs|2p23.3		chr2:24553470-24553529
A_24_P258051	-4.0655	-2.02343	4.0655	down	MASTL	microtubule associated serine/threonine kinase-like	FALSE	Homo sapiens microtubule associated serine/threonine kinase-like (MASTL), transcript variant 2, mRNA [NM_032844]	84930	GO:0005813|GO:0005634|GO:0005524|GO:0032154|GO:0034048|GO:0006974|GO:0005737|GO:0007067|GO:0004674|GO:0016301|GO:0000086|GO:0051726|GO:0005654|GO:0006468|GO:0000278|GO:0051721|GO:0051301	27460003	chr10	27459944	+	hs|10p12.1	NM_032844	chr10:27459944-27460003	NM_032844	Hs.276905
A_33_P3284345	-4.06388	-2.02286	4.06388	down	NRG1	neuregulin 1	FALSE	Homo sapiens neuregulin 1 (NRG1), transcript variant HRG-gamma, mRNA [NM_004495]	3084	GO:0060045|GO:0005515|GO:0043496|GO:0043497|GO:0031594|GO:0030307|GO:0055012|GO:0046579|GO:0030879|GO:0009790|GO:0005615|GO:0043624|GO:0007171|GO:0030297|GO:0030296|GO:0007173|GO:0014032|GO:0000165|GO:0060956|GO:0060379|GO:0051155|GO:0010667|GO:0055007|GO:0043125|GO:0003712|GO:0038127|GO:0045213|GO:0007416|GO:0005125|GO:2000727|GO:0045785|GO:0005176|GO:0008543|GO:0005887|GO:0045087|GO:0007422|GO:…	32585580	chr8	32585521	+	hs|8p12	NM_004495	chr8:32585521-32585580	NM_004495	Hs.453951
A_33_P3253707	-4.06324	-2.02263	4.06324	down	LRR1	leucine rich repeat protein 1	FALSE	Homo sapiens leucine rich repeat protein 1 (LRR1), transcript variant 1, mRNA [NM_152329]	122769	GO:0016567	50081372	chr14	50081313	+	hs|14q21.3	NM_152329	chr14:50081313-50081372	NM_152329	Hs.451090
A_23_P145761	-4.05877	-2.02104	4.05877	down	ARL4A	ADP-ribosylation factor-like 4A	FALSE	Homo sapiens ADP-ribosylation factor-like 4A (ARL4A), transcript variant 1, mRNA [NM_005738]	10124	GO:0005515|GO:0005737|GO:0005886|GO:0050873|GO:0007264|GO:0005730|GO:0005634|GO:0005525	12728340	chr7	12728281	+	hs|7p21.3	NM_005738	chr7:12728281-12728340	NM_005738	Hs.245540
A_33_P3366391	-4.0569	-2.02038	4.0569	down			FALSE	keratin 18 pseudogene 59 [Source:HGNC Symbol;Acc:HGNC:48886] [ENST00000534728]			124984751	chr11	124984692	+	hs|11q24.2		chr11:124984692-124984751		Hs.640102
A_23_P41942	-4.05618	-2.02012	4.05618	down	POLR3G	polymerase (RNA) III (DNA directed) polypeptide G (32kD)	FALSE	Homo sapiens polymerase (RNA) III (DNA directed) polypeptide G (32kD) (POLR3G), mRNA [NM_006467]	10622	GO:0032728|GO:0010467|GO:0000790|GO:0006386|GO:0006385|GO:0003899|GO:0008283|GO:0006359|GO:0006384|GO:0006383|GO:0005829|GO:0051607|GO:0045089|GO:0001056|GO:0045087|GO:0005666|GO:0032481|GO:0005654	89781426	chr5	89781367	+	hs|5q14.3	NM_006467	chr5:89781367-89781426	NM_006467	Hs.282387
A_23_P161563	-4.048	-2.01721	4.048	down	RAB38	RAB38, member RAS oncogene family	FALSE	Homo sapiens RAB38, member RAS oncogene family (RAB38), mRNA [NM_022337]	23682	GO:0005802|GO:0005515|GO:0005886|GO:0007264|GO:0005783|GO:0035612|GO:0003924|GO:0015031|GO:0006886|GO:0005829|GO:0030670|GO:0032482|GO:0090383|GO:0035650|GO:0042470|GO:0035651|GO:0072657|GO:0005525|GO:0006184|GO:0045335|GO:0030742|GO:0031905|GO:0016020|GO:0035646|GO:0060155|GO:0019003|GO:0005769	87883009	chr11	87882950	-	hs|11q14.2	NM_022337	chr11:87883009-87882950	NM_022337	Hs.591975
A_19_P00321743	-4.04277	-2.01535	4.04277	down	LOC100130938	uncharacterized LOC100130938	FALSE	PREDICTED: Homo sapiens uncharacterized LOC100130938 (LOC100130938), transcript variant X1, ncRNA [XR_110148]	100130938		59273599	chr18	59273540	-	hs|18q21.33	XR_110148	chr18:59273599-59273540	XR_110148	Hs.710069
A_23_P165937	-4.04069	-2.0146	4.04069	down	DSN1	DSN1, MIS12 kinetochore complex component	FALSE	Homo sapiens DSN1, MIS12 kinetochore complex component (DSN1), transcript variant 3, mRNA [NM_024918]	79980	GO:0005515|GO:0007067|GO:0005737|GO:0007059|GO:0005634|GO:0000444|GO:0000278|GO:0051301|GO:0005829	35380814	chr20	35380755	-	hs|20q11.23	NM_024918	chr20:35380814-35380755	NM_024918	Hs.632268
A_23_P314805	-4.03825	-2.01373	4.03825	down	TMEM56	transmembrane protein 56	FALSE	Homo sapiens transmembrane protein 56 (TMEM56), transcript variant 2, mRNA [NM_152487]	148534	GO:0008150|GO:0003674|GO:0016021|GO:0005575	95658474	chr1	95658415	+	hs|1p21.3	NM_152487	chr1:95658415-95658474	NM_152487	Hs.483512
A_33_P3277659	-4.03319	-2.01192	4.03319	down	ANKRD30B	ankyrin repeat domain 30B	FALSE	Homo sapiens ankyrin repeat domain 30B (ANKRD30B), mRNA [NM_001145029]	374860	GO:0008150|GO:0003674|GO:0005575	14852365	chr18	14852306	+	hs|18p11.21	NM_001145029	chr18:14852306-14852365	NM_001145029	Hs.567889
A_23_P397293	-4.02662	-2.00957	4.02662	down	LY6K	lymphocyte antigen 6 complex, locus K	FALSE	Homo sapiens lymphocyte antigen 6 complex, locus K (LY6K), transcript variant 1, mRNA [NM_017527]	54742	GO:0005737|GO:0005886|GO:0005730|GO:0005634|GO:0005576|GO:0031225	143784880	chr8	143784821	+	hs|8q24.3	NM_017527	chr8:143784821-143784880	NM_017527	Hs.69517
A_23_P15734	-4.02379	-2.00856	4.02379	down	KRT9	keratin 9, type I	FALSE	Homo sapiens keratin 9, type I (KRT9), mRNA [NM_000226]	3857	GO:0005882|GO:0045109|GO:0016020|GO:0008544|GO:0005200|GO:0043588|GO:0005634|GO:0007283|GO:0005615|GO:0070062	39722110	chr17	39722093	-	hs|17q21.2	NM_000226	chr17:39722110-39722093	NM_000226	Hs.654569
A_23_P48327	-4.01982	-2.00713	4.01982	down	KCTD4	potassium channel tetramerization domain containing 4	FALSE	Homo sapiens potassium channel tetramerization domain containing 4 (KCTD4), mRNA [NM_198404]	386618	GO:0051260	45767809	chr13	45767750	-	hs|13q14.12	NM_198404	chr13:45767809-45767750	NM_198404	Hs.23406
A_33_P3258660	-4.01463	-2.00527	4.01463	down	SCD5	stearoyl-CoA desaturase 5	FALSE	Homo sapiens stearoyl-CoA desaturase 5 (SCD5), transcript variant 2, mRNA [NM_024906]	79966	GO:0005506|GO:0004768|GO:0005789|GO:0006633|GO:0016021|GO:0055114	83719563	chr4	83719504	-	hs|4q21.22	NM_024906	chr4:83719563-83719504	NM_024906	Hs.379191
A_32_P305888	-4.00951	-2.00343	4.00951	down	SH3TC2	SH3 domain and tetratricopeptide repeats 2	FALSE	Homo sapiens SH3 domain and tetratricopeptide repeats 2 (SH3TC2), mRNA [NM_024577]	79628	GO:0005886|GO:0033157|GO:0031410|GO:0055037|GO:0032287	148381027	chr5	148380968	-	hs|5q32	NM_024577	chr5:148381027-148380968	NM_024577	Hs.483784
A_23_P99604	-4.00875	-2.00315	4.00875	down	G2E3	G2/M-phase specific E3 ubiquitin protein ligase	FALSE	Homo sapiens G2/M-phase specific E3 ubiquitin protein ligase (G2E3), mRNA [NM_017769]	55632	GO:0000209|GO:0005737|GO:0004842|GO:0016874|GO:0001824|GO:0005730|GO:0006915|GO:0008270|GO:2001243	31084745	chr14	31084686	+	hs|14q12	NM_017769	chr14:31084686-31084745	NM_017769	Hs.509008
A_19_P00804196	-4.00826	-2.00298	4.00826	down			FALSE				12885048	chr12	12884989	+	hs|12p13.1		chr12:012884989-012885048
A_23_P138693	-4.00577	-2.00208	4.00577	down	NMT2	N-myristoyltransferase 2	FALSE	Homo sapiens N-myristoyltransferase 2 (NMT2), mRNA [NM_004808]	9397	GO:0005794|GO:0005886|GO:0007603|GO:0019082|GO:0004379|GO:0022400|GO:0019068|GO:0018008|GO:0005829|GO:0005737|GO:0016032|GO:0016056|GO:0019898	15151758	chr10	15151213	-	hs|10p13	NM_004808	chr10:15151758-15151213	NM_004808	Hs.60339
A_24_P126628	-3.99893	-1.99962	3.99893	down	TMEM194A	transmembrane protein 194A	FALSE	Homo sapiens transmembrane protein 194A (TMEM194A), transcript variant 2, mRNA [NM_015257]	23306	GO:0008150|GO:0003674|GO:0016021	57450095	chr12	57450036	-	hs|12q13.3	NM_015257	chr12:57450095-57450036	NM_015257	Hs.591040
A_32_P171328	-3.9953	-1.9983	3.9953	down	UBE2S	ubiquitin-conjugating enzyme E2S	FALSE	Homo sapiens ubiquitin-conjugating enzyme E2S (UBE2S), mRNA [NM_014501]	27338	GO:0010994|GO:0035519|GO:0085020|GO:0010458|GO:0004842|GO:0016874|GO:0005524|GO:0031145|GO:0044314|GO:0051488|GO:0070534|GO:0005737|GO:0070979|GO:0019787|GO:0005680|GO:0006464|GO:0031625|GO:0051301	55912744	chr19	55912685	-	hs|19q13.42	NM_014501	chr19:55912744-55912685	NM_014501	Hs.396393
A_33_P3321533	-3.98354	-1.99405	3.98354	down	TMEM178B	transmembrane protein 178B	FALSE	transmembrane protein 178B [Source:HGNC Symbol;Acc:HGNC:44112] [ENST00000563442]	100507421	GO:0016021	140912555	chr7	140912496	+	hs|7q34		chr7:140912496-140912555
A_23_P312358	-3.9829	-1.99382	3.9829	down	BEND7	BEN domain containing 7	FALSE	Homo sapiens BEN domain containing 7 (BEND7), transcript variant 1, mRNA [NM_152751]	222389	GO:0005515|GO:0070062	13522938	chr10	13494639	-	hs|10p13	NM_152751	chr10:13522938-13494639	NM_152751	Hs.498740
A_33_P3260373	-3.98272	-1.99375	3.98272	down	ISY1-RAB43	ISY1-RAB43 readthrough	FALSE	Homo sapiens ISY1-RAB43 readthrough (ISY1-RAB43), mRNA [NM_001204890]	100534599		128810123	chr3	128810064	-	hs|3q21.3	NM_001204890	chr3:128810123-128810064	NM_001204890	Hs.512661
A_23_P302681	-3.97653	-1.99151	3.97653	down	FIGNL1	fidgetin-like 1	FALSE	Homo sapiens fidgetin-like 1 (FIGNL1), transcript variant 1, mRNA [NM_001042762]	63979	GO:0005515|GO:0043066|GO:0046034|GO:0000287|GO:0033687|GO:0005634|GO:0031122|GO:2001243|GO:0000228|GO:0005524|GO:0071479|GO:0001649|GO:0010569|GO:0008568|GO:0005737|GO:0016787|GO:0051726|GO:0070062	50512991	chr7	50512932	-	hs|7p12.1	NM_001042762	chr7:50512991-50512932	NM_001042762	Hs.137516
A_32_P106732	-3.9761	-1.99135	3.9761	down	FANCM	Fanconi anemia, complementation group M	FALSE	Homo sapiens Fanconi anemia, complementation group M (FANCM), mRNA [NM_020937]	57697	GO:0005515|GO:0071821|GO:0090305|GO:0004386|GO:0003677|GO:0005524|GO:0043240|GO:0004518|GO:0006281|GO:0000712|GO:0003682|GO:0005654|GO:0031297	45669269	chr14	45669210	+	hs|14q21.2	NM_020937	chr14:45669210-45669269	NM_020937	Hs.509229
A_23_P42198	-3.97433	-1.99071	3.97433	down	HIST1H3G	histone cluster 1, H3g	FALSE	Homo sapiens histone cluster 1, H3g (HIST1H3G), mRNA [NM_003534]	8355	GO:0005515|GO:0010467|GO:0046982|GO:0006325|GO:0006335|GO:0005576|GO:0005634|GO:0000228|GO:0003677|GO:0032776|GO:0043234|GO:0060968|GO:0016020|GO:0000183|GO:0007596|GO:0045814|GO:0040029|GO:0005654|GO:0000786|GO:0070062	26271469	chr6	26271410	-	hs|6p22.2	NM_003534	chr6:26271469-26271410	NM_003534	Hs.247813
A_33_P3411885	-3.96939	-1.98892	3.96939	down	LOC100128851	uncharacterized LOC100128851	FALSE	Homo sapiens cDNA FLJ45515 fis, clone BRTHA2022914. [AK127423]	100128851		19223611	chr17	19223552	+	hs|17p11.2	AK127423	chr17:19223552-19223611		Hs.679912
A_19_P00320996	-3.96807	-1.98844	3.96807	down			FALSE	microRNA 29b-1 [Source:HGNC Symbol;Acc:HGNC:31619] [ENST00000418546]			130569122	chr7	130569063	-	hs|7q32.3		chr7:130569122-130569063
A_23_P130398	-3.96338	-1.98673	3.96338	down	CTAGE1	cutaneous T-cell lymphoma-associated antigen 1	FALSE	Homo sapiens cutaneous T-cell lymphoma-associated antigen 1 (CTAGE1), mRNA [NM_172241]	64693	GO:0008150|GO:0016021|GO:0005575	19994048	chr18	19993989	-	hs|18q11.2	NM_172241	chr18:19994048-19993989	NM_172241	Hs.406709
A_23_P344281	-3.96149	-1.98604	3.96149	down	ZIK1	zinc finger protein interacting with K protein 1	FALSE	Homo sapiens zinc finger protein interacting with K protein 1 (ZIK1), mRNA [NM_001010879]	284307	GO:0006355|GO:0005634|GO:0003677|GO:0046872|GO:0006351	58102935	chr19	58102876	+	hs|19q13.43	NM_001010879	chr19:58102876-58102935	NM_001010879	Hs.454830
A_33_P3387861	-3.96062	-1.98573	3.96062	down	CENPN	centromere protein N	FALSE	Homo sapiens centromere protein N (CENPN), transcript variant 2, mRNA [NM_001100624]	55839	GO:0034080|GO:0007067|GO:0007059|GO:0006334|GO:0000777|GO:0005654|GO:0005634|GO:0000278|GO:0005829	81065089	chr16	81065030	+	hs|16q23.2	NM_001100624	chr16:81065030-81065089	NM_001100624	Hs.726537
A_24_P647682	-3.9517	-1.98247	3.9517	down			FALSE	tubulin, beta class I pseudogene 6 [Source:HGNC Symbol;Acc:HGNC:42175] [ENST00000416519]			55714309	chr7	55714250	+	hs|7p11.2		chr7:55714250-55714309
A_33_P3542599	-3.94303	-1.9793	3.94303	down	SNORA2A	small nucleolar RNA, H/ACA box 2A	FALSE	CM3-MT0388-260101-688-e11_1 MT0388 Homo sapiens cDNA, mRNA sequence [CV322587]	677793		49050467	chr12	49050408	-	hs|12q13.11	CV322587	chr12:49050467-49050408		Hs.689723
A_33_P3301524	-3.94261	-1.97915	3.94261	down	XRCC3	X-ray repair complementing defective repair in Chinese hamster cells 3	FALSE	Homo sapiens X-ray repair complementing defective repair in Chinese hamster cells 3 (XRCC3), transcript variant 1, mRNA [NM_001100119]	7517	GO:0000400|GO:0005515|GO:0048471|GO:0010033|GO:0071140|GO:0005657|GO:0008821|GO:0005634|GO:0006310|GO:0090267|GO:0010824|GO:0005524|GO:0006974|GO:0005739|GO:0005737|GO:0006281|GO:0000724|GO:0033065|GO:0000737|GO:0008094	104164014	chr14	104163955	-	hs|14q32.33	NM_001100119	chr14:104164014-104163955	NM_001100119	Hs.733412
A_33_P3238976	-3.93928	-1.97793	3.93928	down	TRMT5	tRNA methyltransferase 5	FALSE	Homo sapiens tRNA methyltransferase 5 (TRMT5), mRNA [NM_020810]	57570	GO:0005759|GO:0030488|GO:0052906|GO:0005634	61439147	chr14	61439088	-	hs|14q23.1	NM_020810	chr14:61439147-61439088	NM_020810	Hs.380159
A_23_P11652	-3.92999	-1.97453	3.92999	down	USP1	ubiquitin specific peptidase 1	FALSE	Homo sapiens ubiquitin specific peptidase 1 (USP1), transcript variant 1, mRNA [NM_003368]	7398	GO:0005515|GO:0016579|GO:0004843|GO:0005634|GO:0004197|GO:0001501|GO:0006281|GO:0006282|GO:0061136|GO:0035520|GO:0005654|GO:0043161|GO:0009411	62917329	chr1	62917270	+	hs|1p31.3	NM_003368	chr1:62917270-62917329	NM_003368	Hs.35086
A_33_P3389261	-3.92442	-1.97248	3.92442	down	TMEM194B	transmembrane protein 194B	FALSE	Homo sapiens transmembrane protein 194B (TMEM194B), mRNA [NM_001142645]	100131211	GO:0016021	191371678	chr2	191371619	-	hs|2q32.2	NM_001142645	chr2:191371678-191371619	NM_001142645	Hs.659824
A_33_P3391970	-3.92379	-1.97225	3.92379	down			FALSE				70355550	chr5	70355491	-	hs|5q13.2		chr5:070355550-070355491
A_23_P254702	-3.91732	-1.96987	3.91732	down	DEK	DEK proto-oncogene	FALSE	Homo sapiens DEK proto-oncogene (DEK), transcript variant 1, mRNA [NM_003472]	7913	GO:2001032|GO:0042393|GO:0007165|GO:0006366|GO:0006357|GO:0043292|GO:2000779|GO:0005634|GO:0019079|GO:0003677|GO:0016568	18225006	chr6	18224948	-	hs|6p22.3	NM_003472	chr6:18225006-18224948	NM_003472	Hs.484813
A_33_P3320082	-3.91675	-1.96966	3.91675	down	NFIB	nuclear factor I/B	FALSE	Homo sapiens nuclear factor I/B (NFIB), transcript variant 3, mRNA [NM_005596]	4781	GO:0021960|GO:0006366|GO:0000981|GO:0071679|GO:0005634|GO:0060509|GO:2000795|GO:0003690|GO:0002062|GO:0061141|GO:0021740|GO:0045944|GO:2000791|GO:0001106|GO:0044300|GO:0005730|GO:0000122|GO:0000978|GO:0003677|GO:0043392|GO:0006260|GO:0001077|GO:0010001|GO:0060486|GO:0005654|GO:0060510|GO:0030902	14307048	chr9	14306989	-	hs|9p22.3	NM_005596	chr9:14307048-14306989	NM_005596	Hs.644095
A_23_P201655	-3.91252	-1.9681	3.91252	down	MYCBP	MYC binding protein	FALSE	Homo sapiens MYC binding protein (MYCBP), transcript variant 1, mRNA [NM_012333]	26292	GO:0005739|GO:0005515|GO:0006355|GO:0005813|GO:0005737|GO:0003713|GO:0005634|GO:0007283|GO:0006351	39330362	chr1	39330303	-	hs|1p34.3	NM_012333	chr1:39330362-39330303	NM_012333	Hs.591506
A_33_P3316223	-3.907	-1.96606	3.907	down	SNAPC1	small nuclear RNA activating complex, polypeptide 1, 43kDa	FALSE	Homo sapiens small nuclear RNA activating complex, polypeptide 1, 43kDa (SNAPC1), mRNA [NM_003082]	6617	GO:0010467|GO:0006355|GO:0005654|GO:0006383|GO:0003677	62262762	chr14	62262703	+	hs|14q23.2	NM_003082	chr14:62262703-62262762	NM_003082	Hs.179312
A_33_P3396527	-3.907	-1.96606	3.907	down	POLR3G	polymerase (RNA) III (DNA directed) polypeptide G (32kD)	FALSE	Homo sapiens polymerase (RNA) III (DNA directed) polypeptide G (32kD) (POLR3G), mRNA [NM_006467]	10622	GO:0032728|GO:0010467|GO:0000790|GO:0006386|GO:0006385|GO:0003899|GO:0008283|GO:0006359|GO:0006384|GO:0006383|GO:0005829|GO:0051607|GO:0045089|GO:0001056|GO:0045087|GO:0005666|GO:0032481|GO:0005654	89810177	chr5	89810118	+	hs|5q14.3	NM_006467	chr5:89810118-89810177	NM_006467	Hs.282387
A_24_P41570	-3.90419	-1.96503	3.90419	down	H2AFZ	H2A histone family, member Z	FALSE	Homo sapiens H2A histone family, member Z (H2AFZ), mRNA [NM_002106]	3015	GO:0005515|GO:0001740|GO:0046982|GO:0005719|GO:0031492|GO:0005634|GO:0000978|GO:0000979|GO:0031490|GO:0005720|GO:0071392|GO:0045944|GO:0000980|GO:0000786|GO:0070062	100869267	chr4	100869240	-	hs|4q23	NM_002106	chr4:100869267-100869240	NM_002106	Hs.119192
A_23_P368225	-3.90309	-1.96462	3.90309	down	EME1	essential meiotic structure-specific endonuclease 1	FALSE	Homo sapiens essential meiotic structure-specific endonuclease 1 (EME1), transcript variant 2, mRNA [NM_152463]	146956	GO:0005515|GO:0005737|GO:0005720|GO:0006281|GO:0004519|GO:0090305|GO:0005730|GO:0006310|GO:0005634|GO:0072429|GO:0003677|GO:0046872	48458686	chr17	48458627	+	hs|17q21.33	NM_152463	chr17:48458627-48458686	NM_152463	Hs.514330
A_23_P132763	-3.90169	-1.9641	3.90169	down	VGLL3	vestigial-like family member 3	FALSE	Homo sapiens vestigial-like family member 3 (VGLL3), mRNA [NM_016206]	389136	GO:0006355|GO:0005634|GO:0006351	86987218	chr3	86987159	-	hs|3p12.1	NM_016206	chr3:86987218-86987159	NM_016206	Hs.744116
A_23_P33093	-3.90077	-1.96376	3.90077	down	ST6GALNAC5	ST6 (alpha-N-acetyl-neuraminyl-2,3-beta-galactosyl-1,3)-N-acetylgalactosaminide alpha-2,6-sialyltransferase 5	FALSE	Homo sapiens ST6 (alpha-N-acetyl-neuraminyl-2,3-beta-galactosyl-1,3)-N-acetylgalactosaminide alpha-2,6-sialyltransferase 5 (ST6GALNAC5), mRNA [NM_030965]	81849	GO:0001665|GO:0009312|GO:0008373|GO:0000139|GO:0006688|GO:0016021|GO:0006488|GO:0044267|GO:0043687|GO:0018279	77529081	chr1	77529022	+	hs|1p31.1	NM_030965	chr1:77529022-77529081	NM_030965	Hs.303609
A_23_P52311	-3.90012	-1.96352	3.90012	down	TAF5	TAF5 RNA polymerase II, TATA box binding protein (TBP)-associated factor, 100kDa	FALSE	Homo sapiens TAF5 RNA polymerase II, TATA box binding protein (TBP)-associated factor, 100kDa (TAF5), mRNA [NM_006951]	6877	GO:0005515|GO:0006352|GO:0010467|GO:0006355|GO:0006368|GO:0003700|GO:0005669|GO:0006367|GO:0044212|GO:0016573|GO:0006366|GO:0005730|GO:0005634|GO:0015629|GO:0043231|GO:0033276|GO:0046983|GO:0016032|GO:0005654|GO:0004402|GO:0016568	105147429	chr10	105147370	+	hs|10q24.33	NM_006951	chr10:105147370-105147429	NM_006951	Hs.96103
A_23_P73982	-3.88006	-1.95608	3.88006	down	NDC1	NDC1 transmembrane nucleoporin	FALSE	Homo sapiens NDC1 transmembrane nucleoporin (NDC1), transcript variant 1, mRNA [NM_018087]	55706	GO:0007129|GO:0031965|GO:0005737|GO:0016020|GO:0005643|GO:0031081|GO:0017056|GO:0051028|GO:0007283|GO:0051292|GO:0015031	54233538	chr1	54233479	-	hs|1p32.3	NM_018087	chr1:54233538-54233479	NM_018087	Hs.476525
A_33_P3303385	-3.87859	-1.95553	3.87859	down	NCAPD2	non-SMC condensin I complex, subunit D2	FALSE	Homo sapiens non-SMC condensin I complex, subunit D2 (NCAPD2), mRNA [NM_014865]	9918	GO:0000796|GO:0005515|GO:0000793|GO:0000797|GO:0007076|GO:0005634|GO:0000228|GO:0005829|GO:0042393|GO:0005737|GO:0016020|GO:0005654|GO:0045120|GO:0000278|GO:0051301	6641101	chr12	6641042	+	hs|12p13.31	NM_014865	chr12:6641042-6641101	NM_014865	Hs.5719
A_23_P388168	-3.87762	-1.95517	3.87762	down	RAB3B	RAB3B, member RAS oncogene family	FALSE	Homo sapiens RAB3B, member RAS oncogene family (RAB3B), mRNA [NM_002867]	5865	GO:0005515|GO:0048471|GO:0009306|GO:0005886|GO:0003924|GO:0006886|GO:0006904|GO:0005829|GO:0005737|GO:0019882|GO:0051586|GO:0017157|GO:0032482|GO:0070062|GO:0005525|GO:0016079|GO:0031982|GO:0072659|GO:0008021|GO:0006184|GO:0018125|GO:0031489|GO:0019003|GO:0005768|GO:0030667	52385367	chr1	52385308	-	hs|1p32.3	NM_002867	chr1:52385367-52385308	NM_002867	Hs.123072
A_33_P3344127	-3.87545	-1.95436	3.87545	down	HIST1H2AC	histone cluster 1, H2ac	FALSE	Homo sapiens histone cluster 1, H2ac (HIST1H2AC), mRNA [NM_003512]	8334	GO:0008150|GO:0003674|GO:0046982|GO:0005634|GO:0000786|GO:0003677|GO:0070062	26124520	chr6	26124461	+	hs|6p22.2	NM_003512	chr6:26124461-26124520	NM_003512	Hs.484950
A_23_P323685	-3.87112	-1.95275	3.87112	down	HIST1H4H	histone cluster 1, H4h	FALSE	Homo sapiens histone cluster 1, H4h (HIST1H4H), mRNA [NM_003543]	8365	GO:0005515|GO:0010467|GO:0006325|GO:0005634|GO:0045653|GO:0000723|GO:0000183|GO:0000786|GO:0070062|GO:0035574|GO:0035575|GO:0046982|GO:0006334|GO:0006335|GO:0005576|GO:0006336|GO:0000228|GO:0003677|GO:0032776|GO:0034080|GO:0043234|GO:0016020|GO:0045814|GO:0040029|GO:0005654|GO:0000278	26285556	chr6	26285497	-	hs|6p22.2	NM_003543	chr6:26285556-26285497	NM_003543	Hs.591790
A_23_P205789	-3.87111	-1.95275	3.87111	down	GABPB1	GA binding protein transcription factor, beta subunit 1	FALSE	Homo sapiens GA binding protein transcription factor, beta subunit 1 (GABPB1), transcript variant gamma-1, mRNA [NM_002041]	2553	GO:0005515|GO:0006996|GO:0003700|GO:0046982|GO:0044212|GO:0006357|GO:0045944|GO:0005654|GO:0005634|GO:0007005|GO:0006351	50578281	chr15	50578222	-	hs|15q21.2	NM_002041	chr15:50578281-50578222	NM_002041	Hs.654350
A_33_P3258612	-3.86348	-1.9499	3.86348	down	PCNA	proliferating cell nuclear antigen	FALSE	Homo sapiens proliferating cell nuclear antigen (PCNA), transcript variant 1, mRNA [NM_002592]	5111	GO:0005515|GO:0043626|GO:0032405|GO:0008283|GO:0033993|GO:0005634|GO:0032077|GO:0019985|GO:0042802|GO:0007507|GO:0006271|GO:0005737|GO:0000082|GO:0000083|GO:0006272|GO:0000723|GO:0030855|GO:0000722|GO:0070557|GO:0005663|GO:0006297|GO:0006298|GO:0043596|GO:0006275|GO:0070062|GO:0030971|GO:0005813|GO:0070182|GO:0000701|GO:0030337|GO:0006281|GO:0006283|GO:0006284|GO:0032139|GO:0005654|GO:0006289|GO:…	5098223	chr20	5098164	-	hs|20p13	NM_002592	chr20:5098223-5098164	NM_002592	Hs.147433
A_19_P00803342	-3.86279	-1.94964	3.86279	down	ZNF678	zinc finger protein 678	FALSE	Homo sapiens zinc finger protein 678 (ZNF678), transcript variant 1, mRNA [NM_178549]	339500	GO:0006355|GO:0005634|GO:0003677|GO:0046872|GO:0006351	227850101	chr1	227850042	+	hs|1q42.13	NM_178549	chr1:227850042-227850101	NM_178549	Hs.30323
A_33_P3226357	-3.86228	-1.94945	3.86228	down	FOXE1	forkhead box E1	FALSE	Homo sapiens forkhead box E1 (FOXE1), mRNA [NM_004473]	2304	GO:0003700|GO:0006357|GO:0006366|GO:0000981|GO:0048538|GO:0005634|GO:0000122|GO:0030878|GO:0003677|GO:0009653|GO:0048562|GO:0031069|GO:0043565|GO:0016477|GO:0060465|GO:0006590|GO:0045893|GO:0045892|GO:0060022|GO:0060023	100618975	chr9	100618916	+	hs|9q22.33	NM_004473	chr9:100618916-100618975	NM_004473	Hs.159234
A_19_P00326008	-3.85699	-1.94748	3.85699	down			FALSE				247126338	chr1	247126279	-	hs|1q44		chr1:247126338-247126279
A_33_P3321275	-3.85222	-1.94569	3.85222	down	KMT2C	lysine (K)-specific methyltransferase 2C	FALSE	Homo sapiens lysine (K)-specific methyltransferase 2C (KMT2C), mRNA [NM_170606]	58508	GO:0035556|GO:0005515|GO:0035097|GO:0006355|GO:0006325|GO:0008270|GO:0005654|GO:0005634|GO:0042800|GO:0003677|GO:0051568|GO:0006351	151921158	chr7	151921100	-	hs|7q36.1	NM_170606	chr7:151921158-151921100	NM_170606	Hs.647120
A_23_P18579	-3.84287	-1.94218	3.84287	down	PTTG2	pituitary tumor-transforming 2	FALSE	Homo sapiens pituitary tumor-transforming 2 (PTTG2), mRNA [NM_006607]	10744	GO:0003674|GO:0051276|GO:0017124|GO:0005737|GO:0005634	37962401	chr4	37962342	+	hs|4p14	NM_006607	chr4:37962342-37962401	NM_006607	Hs.668806
A_19_P00810995	-3.84244	-1.94202	3.84244	down			FALSE				111960740	chr2	111960681	-	hs|2q13		chr2:111960740-111960681
A_23_P403488	-3.83875	-1.94064	3.83875	down	NLRP10	NLR family, pyrin domain containing 10	FALSE	Homo sapiens NLR family, pyrin domain containing 10 (NLRP10), mRNA [NM_176821]	338322	GO:2000318|GO:0050829|GO:0005737|GO:2000778|GO:0045087|GO:0002827|GO:0050832|GO:0035397|GO:0005524|GO:2000484|GO:0019897	7981537	chr11	7981478	-	hs|11p15.4	NM_176821	chr11:7981537-7981478	NM_176821	Hs.449636
A_33_P3280805	-3.82209	-1.93436	3.82209	down	LMO7	LIM domain 7	FALSE	Homo sapiens LIM domain 7 (LMO7), transcript variant 2, mRNA [NM_015842]	4008	GO:0005737|GO:0004842|GO:0016567|GO:0023051|GO:0000151|GO:0008270|GO:0005634|GO:0030155|GO:0005925	76423370	chr13	76423311	+	hs|13q22.2	NM_015842	chr13:76423311-76423370	NM_015842	Hs.207631
A_33_P3366102	-3.81964	-1.93344	3.81964	down	KLHL7	kelch-like family member 7	FALSE	Homo sapiens kelch-like family member 7 (KLHL7), transcript variant 3, mRNA [NM_001172428]	55975	GO:0005737|GO:0016567|GO:0005886|GO:0031463|GO:0005730|GO:0005654|GO:0005634|GO:0042803	23164762	chr7	23164703	+	hs|7p15.3	NM_001172428	chr7:23164703-23164762	NM_001172428	Hs.654817
A_23_P132644	-3.81957	-1.93341	3.81957	down	NCEH1	neutral cholesterol ester hydrolase 1	FALSE	Homo sapiens neutral cholesterol ester hydrolase 1 (NCEH1), transcript variant 2, mRNA [NM_020792]	57552	GO:0052689|GO:0016042|GO:0016020|GO:0005783|GO:0016021	172348635	chr3	172348576	-	hs|3q26.31	NM_020792	chr3:172348635-172348576	NM_020792	Hs.444099
A_32_P204676	-3.8081	-1.92907	3.8081	down	FABP5	fatty acid binding protein 5 (psoriasis-associated)	FALSE	Homo sapiens fatty acid binding protein 5 (psoriasis-associated) (FABP5), mRNA [NM_001444]	2171	GO:0005515|GO:0006629|GO:0005215|GO:0005504|GO:0005829|GO:0008289|GO:0005737|GO:0008544|GO:0015758|GO:0006006|GO:0005654|GO:0006656|GO:0070062	82195675	chr8	82195616	+	hs|8q21.13	NM_001444	chr8:82195616-82195675	NM_001444	Hs.408061
A_23_P161152	-3.79983	-1.92594	3.79983	down	PDSS1	prenyl (decaprenyl) diphosphate synthase, subunit 1	FALSE	Homo sapiens prenyl (decaprenyl) diphosphate synthase, subunit 1 (PDSS1), mRNA [NM_014317]	23590	GO:0050347|GO:0006744|GO:0000010|GO:0046982|GO:0005759|GO:0051290|GO:0044281|GO:0008299|GO:0046872	27031483	chr10	27024507	+	hs|10p12.1	NM_014317	chr10:27024507-27031483	NM_014317	Hs.558468
A_23_P105873	-3.79827	-1.92534	3.79827	down	TRPC4	transient receptor potential cation channel, subfamily C, member 4	FALSE	Homo sapiens transient receptor potential cation channel, subfamily C, member 4 (TRPC4), transcript variant alpha, mRNA [NM_016179]	7223	GO:0005515|GO:0045296|GO:0005886|GO:0008013|GO:0009986|GO:0048709|GO:0014051|GO:0034704|GO:0055085|GO:0070679|GO:0016323|GO:0070509|GO:0034220|GO:0005911|GO:0007411|GO:0005901|GO:0070588|GO:0006816|GO:0015279|GO:0030863	38211126	chr13	38211067	-	hs|13q13.3	NM_016179	chr13:38211126-38211067	NM_016179	Hs.262960
A_32_P55860	-3.79557	-1.92432	3.79557	down	SKA2	spindle and kinetochore associated complex subunit 2	FALSE	Homo sapiens spindle and kinetochore associated complex subunit 2 (SKA2), transcript variant 1, mRNA [NM_182620]	348235	GO:0008017|GO:0005515|GO:0007067|GO:0000940|GO:0007059|GO:0031110|GO:0005876|GO:0000278|GO:0051301|GO:0005829	57208653	chr17	57196809	-	hs|17q22	NM_182620	chr17:57208653-57196809	NM_182620	Hs.463607
A_33_P3350778	-3.79362	-1.92357	3.79362	down	ZNF699	zinc finger protein 699	FALSE	Homo sapiens zinc finger protein 699 (ZNF699), mRNA [NM_198535]	374879	GO:0006355|GO:0003700|GO:0005634|GO:0003677|GO:0046872|GO:0006351	9406045	chr19	9405986	-	hs|19p13.2	NM_198535	chr19:9406045-9405986	NM_198535	Hs.633842
A_23_P215517	-3.78894	-1.92179	3.78894	down	KLHL7	kelch-like family member 7	FALSE	Homo sapiens kelch-like family member 7 (KLHL7), transcript variant 3, mRNA [NM_001172428]	55975	GO:0005737|GO:0016567|GO:0005886|GO:0031463|GO:0005730|GO:0005654|GO:0005634|GO:0042803	23165444	chr7	23165385	+	hs|7p15.3	NM_001172428	chr7:23165385-23165444	NM_001172428	Hs.654817
A_23_P46429	-3.78308	-1.91956	3.78308	down	CYR61	cysteine-rich, angiogenic inducer, 61	FALSE	Homo sapiens cysteine-rich, angiogenic inducer, 61 (CYR61), mRNA [NM_001554]	3491	GO:0044319|GO:0060710|GO:0060591|GO:0003181|GO:0008283|GO:0010811|GO:0007267|GO:0003281|GO:0002041|GO:0001558|GO:0009653|GO:0030513|GO:0006935|GO:0030198|GO:0045944|GO:0045860|GO:0060716|GO:0060548|GO:0007155|GO:0033690|GO:0070372|GO:0008201|GO:0005520|GO:0003278|GO:0043066|GO:2000304|GO:0030335|GO:0060413|GO:0072593|GO:0050840|GO:0005578|GO:0010518|GO:0001649|GO:0045669|GO:0031012|GO:0043280|GO:…	86049012	chr1	86048953	+	hs|1p22.3	NM_001554	chr1:86048953-86049012	NM_001554	Hs.8867
A_23_P159390	-3.78174	-1.91905	3.78174	down	TOPBP1	topoisomerase (DNA) II binding protein 1	FALSE	Homo sapiens topoisomerase (DNA) II binding protein 1 (TOPBP1), mRNA [NM_007027]	11073	GO:0005515|GO:0000794|GO:0005813|GO:0005794|GO:0005694|GO:0005634|GO:0006259|GO:0015629|GO:0008022|GO:0003677|GO:0006974|GO:0042802|GO:0000922|GO:0005737|GO:0006281|GO:0016605|GO:0010212|GO:0001673	133329966	chr3	133329907	-	hs|3q22.1	NM_007027	chr3:133329966-133329907	NM_007027	Hs.593379
A_33_P3376527	-3.78083	-1.9187	3.78083	down	CHST10	carbohydrate sulfotransferase 10	FALSE	Homo sapiens carbohydrate sulfotransferase 10 (CHST10), mRNA [NM_004854]	9486	GO:0016051|GO:0016232|GO:0005794|GO:0016020|GO:0007616|GO:0000139|GO:0008146|GO:0016021|GO:0007612|GO:0007155	101014460	chr2	101014401	-	hs|2q11.2	NM_004854	chr2:101014460-101014401	NM_004854	Hs.516370
A_23_P7636	-3.77611	-1.9169	3.77611	down	PTTG1	pituitary tumor-transforming 1	FALSE	Homo sapiens pituitary tumor-transforming 1 (PTTG1), transcript variant 2, mRNA [NM_004219]	9232	GO:0005515|GO:0051276|GO:0017124|GO:0006355|GO:0003700|GO:0004869|GO:0006366|GO:0005634|GO:0007283|GO:0031145|GO:0005829|GO:0010951|GO:0005737|GO:0007067|GO:0006281|GO:0007059|GO:0000278|GO:0051301	159855703	chr5	159855644	+	hs|5q33.3	NM_004219	chr5:159855644-159855703	NM_004219	Hs.350966
A_23_P322013	-3.77509	-1.91651	3.77509	down	FER1L6-AS1	FER1L6 antisense RNA 1	FALSE	Homo sapiens FER1L6 antisense RNA 1 (FER1L6-AS1), long non-coding RNA [NR_040044]	439941		124997003	chr8	124996944	-	hs|8q24.13	NR_040044	chr8:124997003-124996944	NR_040044	Hs.683919
A_24_P673063	-3.76988	-1.91452	3.76988	down	FABP5	fatty acid binding protein 5 (psoriasis-associated)	FALSE	Homo sapiens fatty acid binding protein 5 (psoriasis-associated) (FABP5), mRNA [NM_001444]	2171	GO:0005515|GO:0006629|GO:0005215|GO:0005504|GO:0005829|GO:0008289|GO:0005737|GO:0008544|GO:0015758|GO:0006006|GO:0005654|GO:0006656|GO:0070062	82196134	chr8	82195741	+	hs|8q21.13	NM_001444	chr8:82195741-82196134	NM_001444	Hs.408061
A_23_P19084	-3.76621	-1.91311	3.76621	down	HNRNPAB	heterogeneous nuclear ribonucleoprotein A/B	FALSE	Homo sapiens heterogeneous nuclear ribonucleoprotein A/B (HNRNPAB), transcript variant 2, mRNA [NM_004499]	3182	GO:0043565|GO:0005737|GO:0003700|GO:0000166|GO:0030529|GO:0003723|GO:0005654|GO:0005634|GO:0001837|GO:0000122|GO:0045893|GO:0003729	177634181	chr5	177634122	+	hs|5q35.3	NM_004499	chr5:177634122-177634181	NM_004499	Hs.591731
A_23_P209799	-3.76245	-1.91167	3.76245	down	MYO7B	myosin VIIB	FALSE	Homo sapiens myosin VIIB (MYO7B), mRNA [NM_001080527]	4648	GO:0005515|GO:0016324|GO:0003774|GO:0008152|GO:0003779|GO:0016459|GO:0005524|GO:0070062	128394948	chr2	128394487	+	hs|2q14.3	NM_001080527	chr2:128394487-128394948	NM_001080527	Hs.154578
A_33_P3277367	-3.75504	-1.90883	3.75504	down	lnc-FAM82A1-2	lnc-FAM82A1-2:2	FALSE	LNCipedia lincRNA (lnc-FAM82A1-2), lincRNA [lnc-FAM82A1-2:2]			38349211	chr2	38349152	+	hs|2p22.2		chr2:38349152-38349211
A_33_P3331856	-3.75093	-1.90725	3.75093	down	PDE1C	phosphodiesterase 1C, calmodulin-dependent 70kDa	FALSE	phosphodiesterase 1C, calmodulin-dependent 70kDa [Source:HGNC Symbol;Acc:HGNC:8776] [ENST00000396184]	5137	GO:0007165|GO:0005516|GO:0048011|GO:0007173|GO:0008543|GO:0045087|GO:0004117|GO:0008152|GO:0007202|GO:0046872|GO:0005829	31823215	chr7	31823156	-	hs|7p14.3	AK126467	chr7:31823215-31823156		Hs.290550
A_33_P3252925	-3.75072	-1.90717	3.75072	down	JADE1	jade family PHD finger 1	FALSE	Homo sapiens jade family PHD finger 1 (JADE1), transcript variant 4, mRNA [NM_001287439]	79960	GO:0005515|GO:0001105|GO:0030308|GO:0005886|GO:0006325|GO:0006950|GO:0006915|GO:2000134|GO:0005634|GO:0006351|GO:0045171|GO:0043981|GO:0043983|GO:0005737|GO:0043982|GO:0043966|GO:0043984|GO:0045944|GO:0000123|GO:0005654|GO:0008270	129796165	chr4	129796106	+	hs|4q28.2	NM_001287439	chr4:129796106-129796165	NM_001287439	Hs.12420
A_33_P3314574	-3.74892	-1.90648	3.74892	down			FALSE				7541174	chr6	7541115	+	hs|6p24.3		chr6:007541115-007541174
A_19_P00800635	-3.7403	-1.90315	3.7403	down			FALSE				39968162	chr6	39968103	+	hs|6p21.2		chr6:039968103-039968162
A_23_P19712	-3.73898	-1.90265	3.73898	down	GMNN	geminin, DNA replication inhibitor	FALSE	Homo sapiens geminin, DNA replication inhibitor (GMNN), transcript variant 1, mRNA [NM_015895]	51053	GO:0005515|GO:0042826|GO:0003714|GO:0005634|GO:0045786|GO:0005829|GO:0005737|GO:0006461|GO:0070491|GO:0009887|GO:0005654|GO:0008156|GO:0000278|GO:0045892	24786167	chr6	24786108	+	hs|6p22.3	NM_015895	chr6:24786108-24786167	NM_015895	Hs.234896
A_33_P3295932	-3.73719	-1.90195	3.73719	down			FALSE				2389292	chr16	2389233	-	hs|16p13.3		chr16:002389292-002389233
A_33_P3258478	-3.73288	-1.90029	3.73288	down			FALSE	killer cell immunoglobulin-like receptor, three domains, pseudogene 1 [Source:HGNC Symbol;Acc:HGNC:16343] [ENST00000611586]			55301669	chr19	55301610	+	hs|19q13.42	AJ630586	chr19:55301610-55301669		Hs.690615
A_23_P398530	-3.73255	-1.90016	3.73255	down	WHSC1	Wolf-Hirschhorn syndrome candidate 1	FALSE	Homo sapiens Wolf-Hirschhorn syndrome candidate 1 (WHSC1), transcript variant 7, mRNA [NM_133334]	7468	GO:2001032|GO:0005515|GO:0003289|GO:0034770|GO:0005694|GO:0048298|GO:0010452|GO:0006325|GO:0005634|GO:0000122|GO:0009653|GO:0003290|GO:0006351|GO:0018024|GO:0043565|GO:0060348|GO:0005737|GO:0003149|GO:0003682|GO:0070201|GO:0005654|GO:0008270	1949568	chr4	1949509	+	hs|4p16.3	NM_133334	chr4:1949509-1949568	NM_133334	Hs.113876
A_33_P3328626	-3.73058	-1.8994	3.73058	down			FALSE	Q3ZCJ0_BOVIN (Q3ZCJ0) RPL36A protein, partial (46%) [THC2692397]			93656715	chr1	93656656	-	hs|1p22.1		chr1:093656715-093656656
A_24_P197964	-3.72265	-1.89633	3.72265	down	TRIM14	tripartite motif containing 14	FALSE	Homo sapiens tripartite motif containing 14 (TRIM14), transcript variant 1, mRNA [NM_014788]	9830	GO:0005622|GO:0003674|GO:0051091|GO:0005737|GO:0051092|GO:0045087|GO:0032897|GO:0008270	100846713	chr9	100846654	-	hs|9q22.33	NM_014788	chr9:100846713-100846654	NM_014788	Hs.575631
A_23_P11598	-3.72252	-1.89628	3.72252	down	ZNF684	zinc finger protein 684	FALSE	Homo sapiens zinc finger protein 684 (ZNF684), mRNA [NM_152373]	127396	GO:0006355|GO:0005634|GO:0003677|GO:0046872|GO:0006351	41012952	chr1	41012893	+	hs|1p34.2	NM_152373	chr1:41012893-41012952	NM_152373	Hs.524767
A_24_P244699	-3.7202	-1.89538	3.7202	down	NUDT15	nudix (nucleoside diphosphate linked moiety X)-type motif 15	FALSE	Homo sapiens nudix (nucleoside diphosphate linked moiety X)-type motif 15 (NUDT15), mRNA [NM_018283]	55270	GO:0006184|GO:0035539|GO:0034656|GO:0006203|GO:0055086|GO:0044281|GO:0008413|GO:0046872|GO:0005829	48620558	chr13	48620499	+	hs|13q14.2	NM_018283	chr13:48620499-48620558	NM_018283	Hs.144407
A_24_P288754	-3.71547	-1.89355	3.71547	down	PIGA	phosphatidylinositol glycan anchor biosynthesis, class A	FALSE	Homo sapiens phosphatidylinositol glycan anchor biosynthesis, class A (PIGA), transcript variant 1, mRNA [NM_002641]	5277	GO:0005515|GO:0006501|GO:0016254|GO:0008194|GO:0000506|GO:0017176|GO:0009893|GO:0016020|GO:0005789|GO:0016021|GO:0044267|GO:0006506|GO:0043687	15337804	chrX	15337745	-	hs|Xp22.2	NM_002641	chrX:15337804-15337745	NM_002641	Hs.137154
A_24_P20873	-3.70304	-1.88871	3.70304	down	HIST1H4I	histone cluster 1, H4i	FALSE	Homo sapiens histone cluster 1, H4i (HIST1H4I), mRNA [NM_003495]	8294	GO:0005515|GO:0010467|GO:0006325|GO:0005634|GO:0045653|GO:0000723|GO:0000183|GO:0000786|GO:0070062|GO:0035574|GO:0035575|GO:0046982|GO:0006334|GO:0006335|GO:0005576|GO:0006336|GO:0000228|GO:0003677|GO:0032776|GO:0034080|GO:0043234|GO:0016020|GO:0045814|GO:0040029|GO:0005654|GO:0000278	27107284	chr6	27107225	+	hs|6p22.1	NM_003495	chr6:27107225-27107284	NM_003495	Hs.248172
A_19_P00317449	-3.69122	-1.8841	3.69122	down	ZNF678	zinc finger protein 678	FALSE	Homo sapiens zinc finger protein 678 (ZNF678), transcript variant 1, mRNA [NM_178549]	339500	GO:0006355|GO:0005634|GO:0003677|GO:0046872|GO:0006351	227850102	chr1	227850043	+	hs|1q42.13	NM_178549	chr1:227850043-227850102	NM_178549	Hs.30323
A_23_P2355	-3.68597	-1.88204	3.68597	down	CBX5	chromobox homolog 5	FALSE	Homo sapiens chromobox homolog 5 (CBX5), transcript variant 3, mRNA [NM_012117]	23468	GO:0005515|GO:0042826|GO:0010369|GO:0005730|GO:0005634|GO:0035064|GO:0005635|GO:0042803|GO:0035097|GO:0005720|GO:0000118|GO:0007596|GO:0017053|GO:0003682|GO:0016605|GO:0070491|GO:0000776|GO:0016032|GO:0005654|GO:0031618|GO:0030674|GO:0045892	54639976	chr12	54639917	-	hs|12q13.13	NM_012117	chr12:54639976-54639917	NM_012117	Hs.349283
A_23_P338479	-3.68126	-1.8802	3.68126	down	CD274	CD274 molecule	FALSE	Homo sapiens CD274 molecule (CD274), transcript variant 1, mRNA [NM_014143]	29126	GO:0005515|GO:2001181|GO:0070232|GO:0005886|GO:0032693|GO:0046006|GO:0046007|GO:0031295|GO:0012505|GO:0007165|GO:0006955|GO:0042102|GO:0016021|GO:0032689|GO:0007166|GO:0009897|GO:0070062	5468369	chr9	5468310	+	hs|9p24.1	NM_014143	chr9:5468310-5468369	NM_014143	Hs.521989
A_23_P127406	-3.68092	-1.88007	3.68092	down	KDM4D	lysine (K)-specific demethylase 4D	FALSE	Homo sapiens lysine (K)-specific demethylase 4D (KDM4D), mRNA [NM_018039]	55693	GO:0032454|GO:0006355|GO:0006325|GO:0072562|GO:0051213|GO:0005654|GO:0046872|GO:0006351|GO:0055114|GO:0033169	94732411	chr11	94732352	+	hs|11q21	NM_018039	chr11:94732352-94732411	NM_018039	Hs.503598
A_23_P213319	-3.68033	-1.87983	3.68033	down	ADAMTS6	ADAM metallopeptidase with thrombospondin type 1 motif, 6	FALSE	Homo sapiens ADAM metallopeptidase with thrombospondin type 1 motif, 6 (ADAMTS6), mRNA [NM_197941]	11174	GO:0006508|GO:0005578|GO:0008270|GO:0004222|GO:0008237	64444890	chr5	64444831	-	hs|5q12.3	NM_197941	chr5:64444890-64444831	NM_197941	Hs.482291
A_23_P28886	-3.68005	-1.87972	3.68005	down	PCNA	proliferating cell nuclear antigen	FALSE	Homo sapiens proliferating cell nuclear antigen (PCNA), transcript variant 1, mRNA [NM_002592]	5111	GO:0005515|GO:0043626|GO:0032405|GO:0008283|GO:0033993|GO:0005634|GO:0032077|GO:0019985|GO:0042802|GO:0007507|GO:0006271|GO:0005737|GO:0000082|GO:0000083|GO:0006272|GO:0000723|GO:0030855|GO:0000722|GO:0070557|GO:0005663|GO:0006297|GO:0006298|GO:0043596|GO:0006275|GO:0070062|GO:0030971|GO:0005813|GO:0070182|GO:0000701|GO:0030337|GO:0006281|GO:0006283|GO:0006284|GO:0032139|GO:0005654|GO:0006289|GO:…	5096102	chr20	5095957	-	hs|20p13	NM_002592	chr20:5096102-5095957	NM_002592	Hs.147433
A_24_P923102	-3.67875	-1.87921	3.67875	down	PHOSPHO2-KLHL23	PHOSPHO2-KLHL23 readthrough	FALSE	Homo sapiens PHOSPHO2-KLHL23 readthrough (PHOSPHO2-KLHL23), mRNA [NM_001199290]	100526832	GO:0005515	170608262	chr2	170608203	+	hs|2q31.1	NM_001199290	chr2:170608203-170608262	NM_001199290	Hs.655150
A_33_P3253596	-3.67787	-1.87887	3.67787	down	KIF4A	kinesin family member 4A	FALSE	Homo sapiens kinesin family member 4A (KIF4A), mRNA [NM_012310]	24137	GO:0005515|GO:0008017|GO:0051256|GO:0016363|GO:0005829|GO:0019886|GO:0005737|GO:0007411|GO:0008574|GO:0005876|GO:0016887|GO:0007018|GO:0005871|GO:0006996|GO:0005694|GO:0000281|GO:0030496|GO:0003777|GO:0005524|GO:0003677|GO:0016020|GO:0007596|GO:0008152|GO:0005654|GO:0008089	69626199	chrX	69626140	+	hs|Xq13.1	NM_012310	chrX:69626140-69626199	NM_012310	Hs.648326
A_23_P422718	-3.67667	-1.8784	3.67667	down	POLH	polymerase (DNA directed), eta	FALSE	Homo sapiens polymerase (DNA directed), eta (POLH), transcript variant 1, mRNA [NM_006502]	5429	GO:0005515|GO:0003887|GO:0006301|GO:0046872|GO:0003684|GO:0006260|GO:0005737|GO:0010225|GO:0006281|GO:0006290|GO:0006282|GO:0000731|GO:0005654	43582388	chr6	43582329	+	hs|6p21.1	NM_006502	chr6:43582329-43582388	NM_006502	Hs.655467
A_23_P429092	-3.6709	-1.87613	3.6709	down	HBS1L	HBS1-like translational GTPase	FALSE	Homo sapiens HBS1-like translational GTPase (HBS1L), transcript variant 3, mRNA [NM_001145207]	10767	GO:0007165|GO:0016020|GO:0003924|GO:0005525|GO:0003746|GO:0006412|GO:0070062|GO:0006414	135357521	chr6	135357462	-	hs|6q23.3	NM_001145207	chr6:135357521-135357462	NM_001145207	Hs.378532
A_23_P213166	-3.66154	-1.87245	3.66154	down	ZGRF1	zinc finger, GRF-type containing 1	FALSE	Homo sapiens zinc finger, GRF-type containing 1 (ZGRF1), mRNA [NM_018392]	55345	GO:0008270|GO:0016021	113460845	chr4	113460786	-	hs|4q25	NM_018392	chr4:113460845-113460786	NM_018392	Hs.380346
A_33_P3375894	-3.65832	-1.87118	3.65832	down			FALSE				209406462	chr1	209406403	+	hs|1q32.2		chr1:209406403-209406462
A_33_P3321372	-3.65576	-1.87017	3.65576	down			FALSE	contactin associated protein-like 3B [Source:HGNC Symbol;Acc:HGNC:32035] [ENST00000276974]			43819679	chr9	43819620	+	hs|9p11.2	AK024257	chr9:43819620-43819679		Hs.604441
A_33_P3409477	-3.65446	-1.86966	3.65446	down	UBASH3B	ubiquitin associated and SH3 domain containing B	FALSE	Homo sapiens ubiquitin associated and SH3 domain containing B (UBASH3B), mRNA [NM_032873]	84959	GO:0005515|GO:0005737|GO:0051279|GO:0090331|GO:0005634|GO:0006469|GO:0035335|GO:0004725	122685157	chr11	122685098	+	hs|11q24.1	NM_032873	chr11:122685098-122685157	NM_032873	Hs.444075
A_33_P3268378	-3.64501	-1.86592	3.64501	down	FAM167A	family with sequence similarity 167, member A	FALSE	Homo sapiens family with sequence similarity 167, member A (FAM167A), mRNA [NM_053279]	83648		11281586	chr8	11281527	-	hs|8p23.1	NM_053279	chr8:11281586-11281527	NM_053279	Hs.124299
A_24_P221485	-3.64319	-1.8652	3.64319	down			FALSE	phosphoserine aminotransferase 1 pseudogene 3 [Source:HGNC Symbol;Acc:HGNC:43989] [ENST00000439132]			79520790	chr1	79520731	-	hs|1p31.1		chr1:79520790-79520731
A_32_P196142	-3.6425	-1.86493	3.6425	down	LOC100130938	uncharacterized LOC100130938	FALSE	PREDICTED: Homo sapiens uncharacterized LOC100130938 (LOC100130938), transcript variant X1, ncRNA [XR_110148]	100130938		59273374	chr18	59273315	-	hs|18q21.33	XR_110148	chr18:59273374-59273315	XR_110148	Hs.710069
A_24_P272515	-3.63815	-1.8632	3.63815	down			FALSE	fatty acid binding protein 5 pseudogene 10 [Source:HGNC Symbol;Acc:HGNC:31066] [ENST00000435729]			152042798	chr2	152042739	+	hs|2q23.3		chr2:152042739-152042798
A_33_P3325502	-3.63792	-1.86311	3.63792	down	ARHGAP29	Rho GTPase activating protein 29	FALSE	Homo sapiens Rho GTPase activating protein 29 (ARHGAP29), mRNA [NM_004815]	9411	GO:0051056|GO:0032321|GO:0007264|GO:0007266|GO:0030165|GO:0046872|GO:0005100|GO:0005829	94634524	chr1	94634465	-	hs|1p22.1	NM_004815	chr1:94634524-94634465	NM_004815	Hs.483238
A_33_P3248629	-3.63718	-1.86282	3.63718	down	DENND2A	DENN/MADD domain containing 2A	FALSE	DENN/MADD domain containing 2A [Source:HGNC Symbol;Acc:HGNC:22212] [ENST00000492720]	27147	GO:0017112|GO:0005737|GO:0042147|GO:0032851|GO:0015629|GO:0015031	140244416	chr7	140244357	-	hs|7q34	BC115004	chr7:140244416-140244357		Hs.6385
A_19_P00320133	-3.63646	-1.86253	3.63646	down			FALSE	CR741480 Soares_parathyroid_tumor_NbHPA Homo sapiens cDNA clone IMAGp971I1759 ; IMAGE:1390525 5', mRNA sequence [CR741480]			49021370	chr15	49021311	-	hs|15q21.1	CR741480	chr15:49021370-49021311		Hs.665344
A_24_P413920	-3.63006	-1.85999	3.63006	down	FAM84A	family with sequence similarity 84, member A	FALSE	Homo sapiens family with sequence similarity 84, member A (FAM84A), mRNA [NM_145175]	151354		14775549	chr2	14775490	+	hs|2p24.3	NM_145175	chr2:14775490-14775549	NM_145175	Hs.260855
A_19_P00328219	-3.62872	-1.85946	3.62872	down			FALSE				67346275	chr10	67346216	+	hs|10q21.3		chr10:067346216-067346275
A_33_P3271945	-3.62697	-1.85876	3.62697	down	HAUS6	HAUS augmin-like complex, subunit 6	FALSE	HAUS augmin-like complex, subunit 6 [Source:HGNC Symbol;Acc:HGNC:25948] [ENST00000380496]	54801	GO:0051297|GO:0003674|GO:0007067|GO:0005813|GO:0005737|GO:0005815|GO:0005874|GO:0005819|GO:0070652|GO:0005654|GO:0051225|GO:0051301	19056989	chr9	19056930	-	hs|9p22.1		chr9:19056989-19056930
A_24_P307572	-3.62524	-1.85808	3.62524	down	ANKRD13A	ankyrin repeat domain 13A	FALSE	Homo sapiens ankyrin repeat domain 13A (ANKRD13A), mRNA [NM_033121]	88455	GO:0005886|GO:0005770	110456276	chr12	110456217	+	hs|12q24.11	NM_033121	chr12:110456217-110456276	NM_033121	Hs.528703
A_33_P3217480	-3.62351	-1.85739	3.62351	down	HIRIP3	HIRA interacting protein 3	FALSE	Homo sapiens HIRA interacting protein 3 (HIRIP3), transcript variant 1, mRNA [NM_003609]	8479	GO:0005515|GO:0005730|GO:0005654|GO:0005634|GO:0006333	30004385	chr16	30004326	-	hs|16p11.2	NM_003609	chr16:30004385-30004326	NM_003609	Hs.567370
A_23_P44139	-3.62181	-1.85671	3.62181	down	PRIM2	primase, DNA, polypeptide 2 (58kDa)	FALSE	Homo sapiens primase, DNA, polypeptide 2 (58kDa) (PRIM2), transcript variant 1, mRNA [NM_000947]	5558	GO:0051539|GO:0003896|GO:0003677|GO:0046872|GO:0000082|GO:0006271|GO:0000723|GO:0006270|GO:0000722|GO:0006269|GO:0005654|GO:0000278|GO:0032201	57513255	chr6	57513196	+	hs|6p11.2	NM_000947	chr6:57513196-57513255	NM_000947	Hs.654580
A_23_P256244	-3.6212	-1.85647	3.6212	down	OXR1	oxidation resistance 1	FALSE	oxidation resistance 1 [Source:HGNC Symbol;Acc:HGNC:15822] [ENST00000497705]	55074	GO:0005739|GO:0003674|GO:0043524|GO:0016491|GO:0007628|GO:0005730|GO:0071447|GO:0005575|GO:0006979|GO:0055114	107719589	chr8	107719530	+	hs|8q23.1	AK096148	chr8:107719530-107719589		Hs.701892
A_33_P3408443	-3.62116	-1.85645	3.62116	down			FALSE				32617222	chr16	32617163	+	hs|16p11.2		chr16:32617163-32617222
A_24_P89080	-3.61486	-1.85394	3.61486	down	DCK	deoxycytidine kinase	FALSE	Homo sapiens deoxycytidine kinase (DCK), mRNA [NM_000788]	1633	GO:0009157|GO:0055086|GO:0005634|GO:0044281|GO:0043097|GO:0006220|GO:0019206|GO:0005524|GO:0009165|GO:0042803|GO:0005829|GO:0016310|GO:0006144|GO:0008144|GO:0043101|GO:0004137|GO:0006206	71895992	chr4	71895933	+	hs|4q13.3	NM_000788	chr4:71895933-71895992	NM_000788	Hs.709
A_33_P3220872	-3.61158	-1.85263	3.61158	down	LOC1720	dihydrofolate reductase pseudogene	FALSE	Homo sapiens dihydrofolate reductase pseudogene (LOC1720), non-coding RNA [NR_033423]	1720		83084246	chr2	83084187	+	hs|2p12	NR_033423	chr2:83084187-83084246	NR_033423	Hs.169235
A_23_P169873	-3.61063	-1.85225	3.61063	down	TRPC2	transient receptor potential cation channel, subfamily C, member 2, pseudogene	FALSE	Homo sapiens transient receptor potential cation channel, subfamily C, member 2, pseudogene (TRPC2), non-coding RNA [NR_002720]	7221		3656346	chr11	3656287	+	hs|11p15.4		chr11:3656287-3656346	NR_002720	Hs.131910
A_33_P3352019	-3.60558	-1.85023	3.60558	down	SCARA3	scavenger receptor class A, member 3	FALSE	Homo sapiens scavenger receptor class A, member 3 (SCARA3), transcript variant 2, mRNA [NM_182826]	51435	GO:0009650|GO:0005581|GO:0000139|GO:0005789|GO:0016021|GO:0006979|GO:0006898|GO:0005044	27517055	chr8	27516996	+	hs|8p21.1	NM_182826	chr8:27516996-27517055	NM_182826	Hs.128856
A_33_P3278043	-3.60443	-1.84977	3.60443	down	TRMT10A	tRNA methyltransferase 10 homolog A (S. cerevisiae)	FALSE	Homo sapiens tRNA methyltransferase 10 homolog A (S. cerevisiae) (TRMT10A), transcript variant 1, mRNA [NM_152292]	93587	GO:0008150|GO:0000049|GO:0010960|GO:0008168|GO:0030488|GO:0005730|GO:0005634|GO:0070062	100469831	chr4	100469772	-	hs|4q23	NM_152292	chr4:100469831-100469772	NM_152292	Hs.380412
A_19_P00331164	-3.59762	-1.84704	3.59762	down			FALSE				207971553	chr1	207971494	-	hs|1q32.2		chr1:207971553-207971494
A_23_P7791	-3.59647	-1.84658	3.59647	down	OGFRL1	opioid growth factor receptor-like 1	FALSE	Homo sapiens opioid growth factor receptor-like 1 (OGFRL1), mRNA [NM_024576]	79627	GO:0016020|GO:0004872	72011872	chr6	72011813	+	hs|6q13	NM_024576	chr6:72011813-72011872	NM_024576	Hs.656091
A_19_P00327091	-3.59417	-1.84566	3.59417	down			FALSE				79087383	chr7	79087324	-	hs|7q21.11		chr7:079087383-079087324
A_33_P3540725	-3.59252	-1.845	3.59252	down	lnc-ZNF674-3	lnc-ZNF674-3:2	FALSE	Homo sapiens cDNA FLJ25917 fis, clone CBR04926. [AK098783]			45707436	chrX	45707377	-	hs|Xp11.3		chrX:45707436-45707377		Hs.633348
A_23_P25706	-3.59106	-1.84441	3.59106	down	CLMN	calmin (calponin-like, transmembrane)	FALSE	Homo sapiens calmin (calponin-like, transmembrane) (CLMN), mRNA [NM_024734]	79789	GO:0005737|GO:0008285|GO:0003779|GO:0016021|GO:0031175	95660925	chr14	95660250	-	hs|14q32.13	NM_024734	chr14:95660925-95660250	NM_024734	Hs.301478
A_19_P00807675	-3.59017	-1.84405	3.59017	down			FALSE				42620142	chr13	42620083	+	hs|13q14.11		chr13:042620083-042620142
A_24_P168726	-3.58844	-1.84336	3.58844	down	NF2	neurofibromin 2 (merlin)	FALSE	Homo sapiens neurofibromin 2 (merlin) (NF2), transcript variant 13, mRNA [NM_181831]	4771	GO:0005515|GO:0048471|GO:0008285|GO:0030036|GO:0070306|GO:0005886|GO:0045597|GO:0042524|GO:0031527|GO:0005634|GO:0032154|GO:0043409|GO:0014010|GO:0005737|GO:1900180|GO:0031647|GO:0005912|GO:0042475|GO:0005856|GO:2000177|GO:0042518|GO:0022408|GO:0030336|GO:0001707|GO:0005730|GO:0045177|GO:0032587|GO:0003779|GO:0007398|GO:0046426|GO:0045216|GO:0030027|GO:0035330|GO:0021766|GO:0016020|GO:0051496|GO:…	30077519	chr22	30077460	+	hs|22q12.2	NM_181831	chr22:30077460-30077519	NM_181831	Hs.187898
A_24_P225468	-3.58603	-1.84239	3.58603	down	ANP32E	acidic (leucine-rich) nuclear phosphoprotein 32 family, member E	FALSE	Homo sapiens acidic (leucine-rich) nuclear phosphoprotein 32 family, member E (ANP32E), transcript variant 1, mRNA [NM_030920]	81611	GO:0042393|GO:0043486|GO:0016023|GO:0005634|GO:0019212|GO:0000812|GO:0043086	150191136	chr1	150191077	-	hs|1q21.2	NM_030920	chr1:150191136-150191077	NM_030920	Hs.656466
A_33_P3295538	-3.57668	-1.83862	3.57668	down	AMIGO3	adhesion molecule with Ig-like domain 3	FALSE	Homo sapiens adhesion molecule with Ig-like domain 3 (AMIGO3), mRNA [NM_198722]	386724	GO:0007420|GO:0016021|GO:0007157	49755052	chr3	49754993	-	hs|3p21.31	NM_198722	chr3:49755052-49754993	NM_198722	Hs.567903
A_19_P00321010	-3.57102	-1.83634	3.57102	down	LINC01133	long intergenic non-protein coding RNA 1133	FALSE	Homo sapiens long intergenic non-protein coding RNA 1133 (LINC01133), long non-coding RNA [NR_038849]	100505633		159931150	chr1	159931091	+	hs|1q23.2	NR_038849	chr1:159931091-159931150	NR_038849	Hs.445045
A_33_P3334384	-3.5646	-1.83374	3.5646	down	KDM4A-AS1	KDM4A antisense RNA 1	FALSE	Homo sapiens KDM4A antisense RNA 1 (KDM4A-AS1), long non-coding RNA [NR_033827]	100132774		44168387	chr1	44168328	-	hs|1p34.1	NR_033827	chr1:44168387-44168328	NR_033827	Hs.655569
A_24_P260639	-3.56257	-1.83292	3.56257	down	HIST1H1D	histone cluster 1, H1d	FALSE	Homo sapiens histone cluster 1, H1d (HIST1H1D), mRNA [NM_005320]	3007	GO:0000790|GO:0005719|GO:0006334|GO:0016584|GO:0000786|GO:0031490	26234758	chr6	26234699	-	hs|6p22.2	NM_005320	chr6:26234758-26234699	NM_005320	Hs.136857
A_23_P80008	-3.56031	-1.832	3.56031	down	MYLK2	myosin light chain kinase 2	FALSE	Homo sapiens myosin light chain kinase 2 (MYLK2), mRNA [NM_033118]	85366	GO:0005515|GO:0005516|GO:0006941|GO:0005634|GO:0007274|GO:0035914|GO:0060048|GO:0005524|GO:0030017|GO:0014816|GO:0032971|GO:0010628|GO:0005737|GO:0046777|GO:0018107|GO:0004687|GO:0004683|GO:0055008	30422469	chr20	30422410	+	hs|20q11.21	NM_033118	chr20:30422410-30422469	NM_033118	Hs.86092
A_23_P35205	-3.55714	-1.83072	3.55714	down	RCAN3	RCAN family member 3	FALSE	Homo sapiens RCAN family member 3 (RCAN3), transcript variant 1, mRNA [NM_013441]	11123	GO:0031013|GO:0019722|GO:0003723|GO:0009653	24863436	chr1	24863377	+	hs|1p36.11	NM_013441	chr1:24863377-24863436	NM_013441	Hs.656799
A_33_P3399593	-3.55342	-1.82921	3.55342	down	CCDC134	coiled-coil domain containing 134	FALSE	Homo sapiens coiled-coil domain containing 134 (CCDC134), mRNA [NM_024821]	79879	GO:0016020|GO:0005576	42221843	chr22	42221784	+	hs|22q13.2	NM_024821	chr22:42221784-42221843	NM_024821	Hs.474991
A_33_P3338300	-3.55304	-1.82906	3.55304	down	CASZ1	castor zinc finger 1	FALSE	Homo sapiens castor zinc finger 1 (CASZ1), transcript variant 1, mRNA [NM_001079843]	54897	GO:0006355|GO:0005737|GO:0007275|GO:0005654|GO:0003677|GO:0046872|GO:0006351|GO:0043231	10696817	chr1	10696758	-	hs|1p36.22	NM_001079843	chr1:10696817-10696758	NM_001079843	Hs.439894
A_23_P148807	-3.5517	-1.82851	3.5517	down	CDC7	cell division cycle 7	FALSE	Homo sapiens cell division cycle 7 (CDC7), transcript variant 1, mRNA [NM_003503]	8317	GO:0005515|GO:0006909|GO:0008284|GO:0008360|GO:0005634|GO:0005524|GO:0046872|GO:0045171|GO:0006260|GO:0010971|GO:0000082|GO:0005737|GO:0004672|GO:0018105|GO:0016301|GO:0004674|GO:0006270|GO:0010571|GO:0015630|GO:0000727|GO:0005654|GO:0000278|GO:0051301	91991106	chr1	91991047	+	hs|1p22.2	NM_003503	chr1:91991047-91991106	NM_003503	Hs.533573
A_23_P150693	-3.54424	-1.82548	3.54424	down	FJX1	four jointed box 1 (Drosophila)	FALSE	Homo sapiens four jointed box 1 (Drosophila) (FJX1), mRNA [NM_014344]	24147	GO:0010842|GO:0005615	35642168	chr11	35642109	+	hs|11p13	NM_014344	chr11:35642109-35642168	NM_014344	Hs.39384
A_33_P3388331	-3.54405	-1.8254	3.54405	down	FARP1	FERM, RhoGEF (ARHGEF) and pleckstrin domain protein 1 (chondrocyte-derived)	FALSE	Homo sapiens FERM, RhoGEF (ARHGEF) and pleckstrin domain protein 1 (chondrocyte-derived) (FARP1), transcript variant 1, mRNA [NM_005766]	10160	GO:0008092|GO:0030054|GO:0045202|GO:0030175|GO:0032855|GO:0007416|GO:0030425|GO:0005829|GO:0031234|GO:0048813|GO:0005737|GO:0043197|GO:0032321|GO:0010923|GO:0005089|GO:0005856|GO:0030676	99076903	chr13	99076844	+	hs|13q32.2	NM_005766	chr13:99076844-99076903	NM_005766	Hs.403917
A_33_P3232273	-3.53362	-1.82115	3.53362	down			FALSE	AF204231 88-kDa Golgi protein {Homo sapiens} (exp=-1; wgp=0; cg=0), partial (4%) [THC2600547]			23259349	chr15	23259290	-	hs|15q11.2		chr15:023259349-023259290
A_24_P683011	-3.53174	-1.82038	3.53174	down	C8orf88	chromosome 8 open reading frame 88	FALSE	Homo sapiens chromosome 8 open reading frame 88 (C8orf88), mRNA [NM_001190972]	100127983		91971239	chr8	91971180	-	hs|8q21.3	NM_001190972	chr8:91971239-91971180	NM_001190972	Hs.733266
A_33_P3370305	-3.52631	-1.81816	3.52631	down	TMEM106A	transmembrane protein 106A	FALSE	Homo sapiens transmembrane protein 106A (TMEM106A), transcript variant 1, mRNA [NM_001291586]	113277	GO:0008150|GO:0003674|GO:0016021|GO:0070062	41370262	chr17	41370203	+	hs|17q21.31	NM_001291586	chr17:41370203-41370262	NM_001291586	Hs.536474
A_33_P3375496	-3.52261	-1.81664	3.52261	down			FALSE				205687566	chr1	205687507	+	hs|1q32.1		chr1:205687507-205687566
A_19_P00329896	-3.51908	-1.8152	3.51908	down			FALSE				106278887	chr4	106278828	-	hs|4q24		chr4:106278887-106278828
A_24_P450596	-3.51711	-1.81439	3.51711	down	ZNF850	zinc finger protein 850	FALSE	Homo sapiens zinc finger protein 850 (ZNF850), transcript variant 1, mRNA [NM_001193552]	342892	GO:0006355|GO:0005634|GO:0003677|GO:0046872|GO:0006351	37234678	chr19	37234619	-	hs|19q13.12	NM_001193552	chr19:37234678-37234619	NM_001193552	Hs.406307
A_33_P3259902	-3.51216	-1.81236	3.51216	down			FALSE	high mobility group nucleosomal binding domain 2 pseudogene 28 [Source:HGNC Symbol;Acc:HGNC:39395] [ENST00000606102]			2341780	chr6	2341721	+	hs|6p25.2		chr6:2341721-2341780
A_33_P3312258	-3.50945	-1.81124	3.50945	down	TUBB	tubulin, beta class I	FALSE	Homo sapiens tubulin, beta class I (TUBB), transcript variant 1, mRNA [NM_001293212]	203068	GO:0005515|GO:0051258|GO:0042288|GO:0042267|GO:0003924|GO:0006928|GO:0005634|GO:0032403|GO:0005829|GO:0000086|GO:0005641|GO:0005856|GO:0007017|GO:0031625|GO:0070062|GO:0006996|GO:0009987|GO:0005874|GO:0019904|GO:0005525|GO:0051225|GO:0044297|GO:0006184|GO:0030705|GO:0032794|GO:0005198|GO:0005200|GO:0000278|GO:0051301	30692815	chr6	30692703	+	hs|6p21.33	NM_001293212	chr6:30692703-30692815	NM_001293212	Hs.636480
A_19_P00331662	-3.50944	-1.81124	3.50944	down			FALSE				88157419	chr3	88157360	-	hs|3p11.1		chr3:088157419-088157360
A_23_P87351	-3.50448	-1.8092	3.50448	down	RRM1	ribonucleotide reductase M1	FALSE	Homo sapiens ribonucleotide reductase M1 (RRM1), mRNA [NM_001033]	6240	GO:0005515|GO:0021846|GO:0015949|GO:0060041|GO:0055086|GO:0051290|GO:0044281|GO:0042995|GO:0005635|GO:0005524|GO:0005829|GO:0006260|GO:0005737|GO:0009263|GO:0010212|GO:0043025|GO:0005654|GO:0004748|GO:0000278|GO:0006206|GO:0008584|GO:0070062|GO:0055114	4160006	chr11	4159947	+	hs|11p15.4	NM_001033	chr11:4159947-4160006	NM_001033	Hs.445705
A_24_P945000	-3.50115	-1.80783	3.50115	down	SKA2	spindle and kinetochore associated complex subunit 2	FALSE	Homo sapiens spindle and kinetochore associated complex subunit 2 (SKA2), transcript variant 1, mRNA [NM_182620]	348235	GO:0008017|GO:0005515|GO:0007067|GO:0000940|GO:0007059|GO:0031110|GO:0005876|GO:0000278|GO:0051301|GO:0005829	57187821	chr17	57187762	-	hs|17q22	NM_182620	chr17:57187821-57187762	NM_182620	Hs.463607
A_33_P3256685	-3.50107	-1.8078	3.50107	down	TTF2	transcription termination factor, RNA polymerase II	FALSE	Homo sapiens transcription termination factor, RNA polymerase II (TTF2), mRNA [NM_003594]	8458	GO:0008380|GO:0005515|GO:0006353|GO:0006397|GO:0008026|GO:0006369|GO:0006355|GO:0003677|GO:0005524|GO:0008023|GO:0005737|GO:0005681|GO:0008270|GO:0008094	117645081	chr1	117645022	+	hs|1p13.1	NM_003594	chr1:117645022-117645081	NM_003594	Hs.486818
A_24_P376120	-3.50019	-1.80743	3.50019	down	MYPN	myopalladin	FALSE	Homo sapiens myopalladin (MYPN), transcript variant 1, mRNA [NM_032578]	84665	GO:0008092|GO:0005515|GO:0051371|GO:0030018|GO:0017124|GO:0045214|GO:0005634|GO:0003779|GO:0031674	69918371	chr10	69918312	+	hs|10q21.3	NM_032578	chr10:69918312-69918371	NM_032578	Hs.55205
A_19_P00320641	-3.49963	-1.8072	3.49963	down	LINC01572	long intergenic non-protein coding RNA 1572	FALSE	Homo sapiens long intergenic non-protein coding RNA 1572 (LINC01572), long non-coding RNA [NR_126330]	101927957		72557305	chr16	72557246	-	hs|16q22.2	NR_126330	chr16:72557305-72557246	NR_126330
A_23_P125265	-3.498	-1.80653	3.498	down	KPNA2	karyopherin alpha 2 (RAG cohort 1, importin alpha 1)	FALSE	Homo sapiens karyopherin alpha 2 (RAG cohort 1, importin alpha 1) (KPNA2), mRNA [NM_002266]	3838	GO:0005515|GO:0042826|GO:0019221|GO:0006259|GO:0006607|GO:0005829|GO:0005737|GO:0016020|GO:0008565|GO:0016032|GO:0005654|GO:0008139|GO:0000018	66042717	chr17	66042658	+	hs|17q24.2	NM_002266	chr17:66042658-66042717	NM_002266	Hs.594238
A_19_P00322333	-3.49785	-1.80647	3.49785	down	LOC101059954	uncharacterized LOC101059954	FALSE	PREDICTED: Homo sapiens uncharacterized LOC101059954 (LOC101059954), ncRNA [XR_172435]	101059954		38682943	chr17	38682884	+	hs|17q21.2	XR_172435	chr17:38682884-38682943	XR_172435
A_32_P157208	-3.49428	-1.805	3.49428	down	PGM5P3-AS1	PGM5P3 antisense RNA 1	FALSE	Homo sapiens PGM5P3 antisense RNA 1 (PGM5P3-AS1), transcript variant 1, long non-coding RNA [NR_121188]	101929127		75002	chr9	74943	+	hs|9p24.3	NR_121188	chr9:74943-75002	NR_121188	Hs.552819
A_23_P431179	-3.48693	-1.80196	3.48693	down	HIST1H4A	histone cluster 1, H4a	FALSE	Homo sapiens histone cluster 1, H4a (HIST1H4A), mRNA [NM_003538]	8359	GO:0005515|GO:0010467|GO:0006325|GO:0005634|GO:0045653|GO:0000723|GO:0000183|GO:0000786|GO:0070062|GO:0035574|GO:0035575|GO:0046982|GO:0006334|GO:0006335|GO:0005576|GO:0006336|GO:0000228|GO:0003677|GO:0032776|GO:0034080|GO:0043234|GO:0016020|GO:0045814|GO:0040029|GO:0005654|GO:0000278	26022266	chr6	26022207	+	hs|6p22.2	NM_003538	chr6:26022207-26022266	NM_003538	Hs.248178
A_33_P3316835	-3.48687	-1.80193	3.48687	down	ZGRF1	zinc finger, GRF-type containing 1	FALSE	zinc finger, GRF-type containing 1 [Source:HGNC Symbol;Acc:HGNC:25654] [ENST00000264370]	55345	GO:0008270|GO:0016021	113527199	chr4	113527140	-	hs|4q25	AK002193	chr4:113527199-113527140		Hs.380346
A_23_P92602	-3.48341	-1.8005	3.48341	down	ABCA11P	ATP-binding cassette, sub-family A (ABC1), member 11, pseudogene	FALSE	Homo sapiens ATP-binding cassette, sub-family A (ABC1), member 11, pseudogene (ABCA11P), non-coding RNA [NR_002451]	79963	GO:0005215|GO:0008152|GO:0006810|GO:0016021|GO:0016887|GO:0005524	419931	chr4	419872	-	hs|4p16.3	NR_002451	chr4:419931-419872	NR_002451	Hs.745030
A_33_P3424153	-3.4812	-1.79959	3.4812	down			FALSE				79817391	chrX	79817332	+	hs|Xq21.1		chrX:79817332-79817391
A_33_P3833211	-3.47974	-1.79898	3.47974	down	DNA2	DNA replication helicase/nuclease 2	FALSE	Homo sapiens DNA replication helicase/nuclease 2 (DNA2), transcript variant 1, mRNA [NM_001080449]	1763	GO:0042645|GO:0005515|GO:0016890|GO:0005760|GO:0005634|GO:0033567|GO:0046872|GO:0006271|GO:0000723|GO:0000722|GO:0043504|GO:0032508|GO:0016887|GO:0000729|GO:0043142|GO:0051539|GO:0045740|GO:0004386|GO:0005524|GO:0003677|GO:0003678|GO:0006260|GO:0004518|GO:0006284|GO:0000076|GO:0043139|GO:0005654|GO:0043137|GO:0017108|GO:0000278|GO:0006264|GO:0000737|GO:0032201	70174805	chr10	70174746	-	hs|10q21.3	NM_001080449	chr10:70174805-70174746	NM_001080449	Hs.532446
A_24_P343095	-3.47717	-1.79791	3.47717	down	DHFR	dihydrofolate reductase	FALSE	Homo sapiens dihydrofolate reductase (DHFR), transcript variant 1, mRNA [NM_000791]	1719	GO:0050661|GO:0050999|GO:0031427|GO:0006767|GO:0044281|GO:0005575|GO:0003729|GO:0009165|GO:0005829|GO:0000082|GO:0000083|GO:0006766|GO:0008144|GO:0046653|GO:0046654|GO:0046655|GO:0046209|GO:0005654|GO:0006545|GO:0000278|GO:0006730|GO:0055114|GO:0004146	79924927	chr5	79924868	-	hs|5q14.1	NM_000791	chr5:79924927-79924868	NM_000791	Hs.648635
A_19_P00809964	-3.47429	-1.79672	3.47429	down			FALSE	Q4SG10_TETNG (Q4SG10) Chromosome 7 SCAF14601, whole genome shotgun sequence, partial (61%) [THC2616992]			33922884	chr13	33922825	-	hs|13q13.1		chr13:033922884-033922825
A_19_P00326172	-3.46769	-1.79398	3.46769	down			FALSE				75203195	chr15	75203136	-	hs|15q24.2		chr15:075203195-075203136
A_33_P3269338	-3.4676	-1.79394	3.4676	down	HAUS5	HAUS augmin-like complex, subunit 5	FALSE	Homo sapiens HAUS augmin-like complex, subunit 5 (HAUS5), mRNA [NM_015302]	23354	GO:0051297|GO:0003674|GO:0007067|GO:0005813|GO:0005737|GO:0005874|GO:0005819|GO:0070652|GO:0051225|GO:0051301	36114511	chr19	36114452	+	hs|19q13.12	NM_015302	chr19:36114452-36114511	NM_015302	Hs.7426
A_23_P254165	-3.46475	-1.79275	3.46475	down	RAI2	retinoic acid induced 2	FALSE	Homo sapiens retinoic acid induced 2 (RAI2), transcript variant 2, mRNA [NM_021785]	10742	GO:0005515|GO:0003674|GO:0009790|GO:0005575	17818437	chrX	17818378	-	hs|Xp22.13	NM_021785	chrX:17818437-17818378	NM_021785	Hs.446680
A_24_P655268	-3.46341	-1.79219	3.46341	down	OIP5-AS1	OIP5 antisense RNA 1	FALSE	Homo sapiens OIP5 antisense RNA 1 (OIP5-AS1), long non-coding RNA [NR_026757]	729082		41591722	chr15	41591663	+	hs|15q15.1		chr15:41591663-41591722	NR_026757	Hs.380164
A_24_P173754	-3.45856	-1.79017	3.45856	down	C1orf21	chromosome 1 open reading frame 21	FALSE	Homo sapiens chromosome 1 open reading frame 21 (C1orf21), mRNA [NM_030806]	81563		184588664	chr1	184567549	+	hs|1q25.3	NM_030806	chr1:184567549-184588664	NM_030806	Hs.744936
A_23_P163027	-3.4508	-1.78693	3.4508	down	PARP2	poly (ADP-ribose) polymerase 2	FALSE	Homo sapiens poly (ADP-ribose) polymerase 2 (PARP2), transcript variant 1, mRNA [NM_005484]	10038	GO:0006471|GO:0005515|GO:0006281|GO:0006284|GO:0005730|GO:0005654|GO:0005634|GO:0097191|GO:0003677|GO:0003950	20825961	chr14	20825902	+	hs|14q11.2	NM_005484	chr14:20825902-20825961	NM_005484	Hs.409412
A_32_P71447	-3.44502	-1.78451	3.44502	down	NCAPD3	non-SMC condensin II complex, subunit D3	FALSE	Homo sapiens non-SMC condensin II complex, subunit D3 (NCAPD3), mRNA [NM_015261]	23310	GO:0005515|GO:0007076|GO:0016020|GO:0042585|GO:0000799|GO:0005654|GO:0035064|GO:0031618|GO:0000278|GO:0051301	134022687	chr11	134022628	-	hs|11q25	NM_015261	chr11:134022687-134022628	NM_015261	Hs.438550
A_33_P3361584	-3.44214	-1.7833	3.44214	down	LOC100130930	uncharacterized LOC100130930	FALSE	Homo sapiens cDNA FLJ44616 fis, clone BRACE2012936. [AK126579]	100130930		4449944	chr19	4449885	+	hs|19p13.3	AK126579	chr19:4449885-4449944		Hs.661664
A_23_P127522	-3.4383	-1.7817	3.4383	down	HYLS1	hydrolethalus syndrome 1	FALSE	Homo sapiens hydrolethalus syndrome 1 (HYLS1), transcript variant 1, mRNA [NM_145014]	219844	GO:0005813|GO:0005737|GO:0005886|GO:0005634	125769963	chr11	125769904	+	hs|11q24.2	NM_145014	chr11:125769904-125769963	NM_145014	Hs.98133
A_23_P42868	-3.43761	-1.78141	3.43761	down	IGFBP1	insulin-like growth factor binding protein 1	FALSE	Homo sapiens insulin-like growth factor binding protein 1 (IGFBP1), mRNA [NM_000596]	3484	GO:0008286|GO:0030307|GO:0031994|GO:0031995|GO:0005576|GO:0042246|GO:0005615|GO:0030968|GO:0007165|GO:0043567|GO:0006987|GO:0044267|GO:0005520	45933025	chr7	45932966	+	hs|7p12.3	NM_000596	chr7:45932966-45933025	NM_000596	Hs.642938
A_23_P171107	-3.43755	-1.78138	3.43755	down	CCNB3	cyclin B3	FALSE	Homo sapiens cyclin B3 (CCNB3), transcript variant 3, mRNA [NM_033031]	85417	GO:0005515|GO:0051321|GO:0019901|GO:0010389|GO:0005654|GO:0000079|GO:0051301	50094750	chrX	50094691	+	hs|Xp11.22	NM_033031	chrX:50094691-50094750	NM_033031	Hs.130310
A_23_P143952	-3.42684	-1.77688	3.42684	down	CEP97	centrosomal protein 97kDa	FALSE	Homo sapiens centrosomal protein 97kDa (CEP97), transcript variant 1, mRNA [NM_024548]	79598	GO:0005515|GO:0043234|GO:0005516|GO:0005813|GO:0005737|GO:0006996|GO:0005815|GO:0030030|GO:0005829	101485708	chr3	101485649	+	hs|3q12.3	NM_024548	chr3:101485649-101485708	NM_024548	Hs.444135
A_33_P3302295	-3.42547	-1.7763	3.42547	down	FOXC2	forkhead box C2	FALSE	Homo sapiens forkhead box C2 (MFH-1, mesenchyme forkhead 1) (FOXC2), mRNA [NM_005251]	2303	GO:0072011|GO:0001656|GO:0008286|GO:0072112|GO:0001657|GO:0003700|GO:0055010|GO:0044212|GO:0006366|GO:0003705|GO:0001756|GO:0048844|GO:0005634|GO:0048703|GO:0007507|GO:0001946|GO:0050880|GO:0007219|GO:0014032|GO:0045944|GO:0030199|GO:0090050|GO:0043010|GO:0009725|GO:0048010|GO:0046620|GO:0001569|GO:0006357|GO:0035050|GO:0033630|GO:0000122|GO:0060038|GO:0031490|GO:0043565|GO:0010595|GO:0001077|GO:…	86602334	chr16	86602275	+	hs|16q24.1	NM_005251	chr16:86602275-86602334	NM_005251	Hs.436448
A_19_P00806947	-3.42202	-1.77485	3.42202	down	PCNA	proliferating cell nuclear antigen	FALSE	Homo sapiens proliferating cell nuclear antigen (PCNA), transcript variant 1, mRNA [NM_002592]	5111	GO:0005515|GO:0043626|GO:0032405|GO:0008283|GO:0033993|GO:0005634|GO:0032077|GO:0019985|GO:0042802|GO:0007507|GO:0006271|GO:0005737|GO:0000082|GO:0000083|GO:0006272|GO:0000723|GO:0030855|GO:0000722|GO:0070557|GO:0005663|GO:0006297|GO:0006298|GO:0043596|GO:0006275|GO:0070062|GO:0030971|GO:0005813|GO:0070182|GO:0000701|GO:0030337|GO:0006281|GO:0006283|GO:0006284|GO:0032139|GO:0005654|GO:0006289|GO:…	5095870	chr20	5095811	-	hs|20p13	NM_002592	chr20:5095870-5095811	NM_002592	Hs.147433
A_23_P100868	-3.41942	-1.77375	3.41942	down	MYO19	myosin XIX	FALSE	Homo sapiens myosin XIX (MYO19), transcript variant 3, mRNA [NM_001033580]	80179	GO:0005737|GO:0003774|GO:0008152|GO:0005741|GO:0003779|GO:0016459|GO:0005524	34869010	chr17	34868951	-	hs|17q12	NM_001033580	chr17:34869010-34868951	NM_001033580	Hs.302051
A_33_P3230269	-3.41837	-1.77331	3.41837	down	GRHL1	grainyhead-like 1 (Drosophila)	FALSE	Homo sapiens grainyhead-like 1 (Drosophila) (GRHL1), mRNA [NM_198182]	29841	GO:0003700|GO:0005794|GO:0006357|GO:0005634|GO:0007275|GO:0044281|GO:0000978|GO:0006351|GO:0043231|GO:0043565|GO:0001077|GO:0005737|GO:0045944|GO:0005654|GO:0044255	10142291	chr2	10142232	+	hs|2p25.1	NM_198182	chr2:10142232-10142291	NM_198182	Hs.418493
A_24_P795371	-3.41782	-1.77308	3.41782	down	NR2F2-AS1	NR2F2 antisense RNA 1	FALSE	Homo sapiens NR2F2 antisense RNA 1 (NR2F2-AS1), transcript variant 1, long non-coding RNA [NR_102743]	644192		96809614	chr15	96809604	-	hs|15q26.2	NR_102743	chr15:96809614-96809604	NR_102743	Hs.58690
A_33_P3288754	-3.41764	-1.773	3.41764	down	C19orf48	chromosome 19 open reading frame 48	FALSE	Homo sapiens chromosome 19 open reading frame 48 (C19orf48), transcript variant 3, mRNA [NM_001290149]	84798		51301021	chr19	51300962	-	hs|19q13.33	NM_001290149	chr19:51301021-51300962	NM_001290149	Hs.256301
A_33_P3357658	-3.4173	-1.77286	3.4173	down	HMGA2	high mobility group AT-hook 2	FALSE	Homo sapiens high mobility group AT-hook 2 (HMGA2), transcript variant 4, mRNA [NM_001300919]	8091	GO:0005515|GO:0003906|GO:0030261|GO:0004677|GO:0006325|GO:0046332|GO:0035985|GO:0010564|GO:0035986|GO:0035987|GO:0035988|GO:0071158|GO:0000989|GO:0032993|GO:0002062|GO:0045444|GO:0000975|GO:0008301|GO:0071141|GO:0031492|GO:0007275|GO:0001047|GO:0000122|GO:2000036|GO:0043392|GO:0043922|GO:0003131|GO:0006284|GO:0070742|GO:0005654|GO:0045893|GO:0045892|GO:0000737|GO:0040008|GO:0051301|GO:0008134|GO:…	66309299	chr12	66309240	+	hs|12q14.3	NM_001300919	chr12:66309240-66309299	NM_001300919	Hs.505924
A_23_P112341	-3.41701	-1.77273	3.41701	down	RMI1	RecQ mediated genome instability 1	FALSE	Homo sapiens RecQ mediated genome instability 1 (RMI1), mRNA [NM_024945]	80010	GO:0006260|GO:0005515|GO:0035264|GO:0005654|GO:0005634|GO:0042593|GO:0002023|GO:0009749	86618905	chr9	86618846	+	hs|9q21.32	NM_024945	chr9:86618846-86618905	NM_024945	Hs.726327
A_33_P3238415	-3.41574	-1.7722	3.41574	down	GSG1	germ cell associated 1	FALSE	Homo sapiens germ cell associated 1 (GSG1), transcript variant 3, mRNA [NM_001080554]	83445	GO:0005789|GO:0016021|GO:0070063	13237895	chr12	13237836	-	hs|12p13.1	NM_001080554	chr12:13237895-13237836	NM_001080554	Hs.240053
A_23_P19590	-3.41426	-1.77157	3.41426	down	EZR	ezrin	FALSE	Homo sapiens ezrin (EZR), transcript variant 1, mRNA [NM_003379]	7430	GO:0005515|GO:0005886|GO:0005884|GO:0008360|GO:0030033|GO:0031528|GO:0030175|GO:0015629|GO:0005615|GO:0036064|GO:0071944|GO:0005829|GO:0031623|GO:0016323|GO:0051286|GO:0016324|GO:0051015|GO:0061028|GO:0007411|GO:0007159|GO:0022614|GO:0046847|GO:0051017|GO:0050839|GO:0007016|GO:0070062|GO:0019904|GO:0005730|GO:0045177|GO:0030315|GO:0032587|GO:0031982|GO:0001726|GO:0045198|GO:0044393|GO:0044297|GO:…	159187729	chr6	159187670	-	hs|6q25.3	NM_003379	chr6:159187729-159187670	NM_003379	Hs.487027
A_23_P47116	-3.41409	-1.7715	3.41409	down	RASSF7	Ras association (RalGDS/AF-6) domain family (N-terminal) member 7	FALSE	Homo sapiens Ras association (RalGDS/AF-6) domain family (N-terminal) member 7 (RASSF7), transcript variant 1, mRNA [NM_003475]	8045	GO:0007165|GO:0005737|GO:0005815|GO:0006915	563270	chr11	563211	+	hs|11p15.5	NM_003475	chr11:563211-563270	NM_003475	Hs.72925
A_33_P3260605	-3.40636	-1.76823	3.40636	down	CTNNAL1	catenin (cadherin-associated protein), alpha-like 1	FALSE	Homo sapiens catenin (cadherin-associated protein), alpha-like 1 (CTNNAL1), transcript variant 1, mRNA [NM_003798]	8727	GO:0051015|GO:0045296|GO:0005886|GO:0007266|GO:0007155|GO:0005856|GO:0005829	111754973	chr9	111754914	-	hs|9q31.3	NM_003798	chr9:111754973-111754914	NM_003798	Hs.58488
A_19_P00321866	-3.406	-1.76808	3.406	down	C1orf132	chromosome 1 open reading frame 132	FALSE	Homo sapiens cDNA FLJ41182 fis, clone BRACE2043349. [AK123177]	100128537		208039591	chr1	208039532	-	hs|1q32.2	AK123177	chr1:208039591-208039532		Hs.445414
A_24_P212072	-3.40248	-1.76659	3.40248	down	ANKRD32	ankyrin repeat domain 32	FALSE	Homo sapiens ankyrin repeat domain 32 (ANKRD32), mRNA [NM_032290]	84250	GO:0005813|GO:0005634	93966359	chr5	93966300	+	hs|5q15	NM_032290	chr5:93966300-93966359	NM_032290	Hs.657315
A_23_P42335	-3.40198	-1.76638	3.40198	down	FANCE	Fanconi anemia, complementation group E	FALSE	Homo sapiens Fanconi anemia, complementation group E (FANCE), mRNA [NM_021922]	2178	GO:0003674|GO:0006281|GO:0005654|GO:0005634|GO:0043240	35434824	chr6	35434765	+	hs|6p21.31	NM_021922	chr6:35434765-35434824	NM_021922	Hs.302003
A_23_P103070	-3.40135	-1.76611	3.40135	down	YWHAH	tyrosine 3-monooxygenase/tryptophan 5-monooxygenase activation protein, eta	FALSE	Homo sapiens tyrosine 3-monooxygenase/tryptophan 5-monooxygenase activation protein, eta (YWHAH), mRNA [NM_003405]	7533	GO:0005515|GO:0086010|GO:0005886|GO:0005159|GO:0035259|GO:0006886|GO:0005829|GO:0005737|GO:1900740|GO:0014704|GO:0048167|GO:0061024|GO:0030659|GO:0070062|GO:0006713|GO:0046982|GO:0019904|GO:0006915|GO:0003779|GO:2000649|GO:0097193|GO:0044325|GO:0021762|GO:0042921|GO:0002028|GO:0045664|GO:0050774|GO:0019899|GO:0045893|GO:0017080	32353197	chr22	32353138	+	hs|22q12.3	NM_003405	chr22:32353138-32353197	NM_003405	Hs.226755
A_23_P7679	-3.39988	-1.76548	3.39988	down	NUP155	nucleoporin 155kDa	FALSE	Homo sapiens nucleoporin 155kDa (NUP155), transcript variant 1, mRNA [NM_153485]	9631	GO:0007077|GO:0005215|GO:0010467|GO:0031965|GO:0005975|GO:0019083|GO:0019221|GO:0019058|GO:0044281|GO:0005635|GO:0006606|GO:0055085|GO:0010827|GO:0008645|GO:0006406|GO:0016020|GO:0015758|GO:0005643|GO:0009405|GO:0086014|GO:0017056|GO:0016032|GO:0006998|GO:0000278	37294554	chr5	37294495	-	hs|5p13.2	NM_153485	chr5:37294554-37294495	NM_153485	Hs.547696
A_24_P43876	-3.39517	-1.76348	3.39517	down	C9orf40	chromosome 9 open reading frame 40	FALSE	Homo sapiens chromosome 9 open reading frame 40 (C9orf40), mRNA [NM_017998]	55071		77562854	chr9	77562795	-	hs|9q21.13	NM_017998	chr9:77562854-77562795	NM_017998	Hs.532296
A_33_P3261197	-3.39455	-1.76322	3.39455	down	NCBP1	nuclear cap binding protein subunit 1, 80kDa	FALSE	Homo sapiens nuclear cap binding protein subunit 1, 80kDa (NCBP1), mRNA [NM_002486]	4686	GO:0005515|GO:0000339|GO:0008380|GO:0006369|GO:0010467|GO:0006368|GO:0006366|GO:0003723|GO:0031124|GO:0005634|GO:0031047|GO:0005829|GO:0005739|GO:0005737|GO:0006406|GO:0000184|GO:0016032|GO:0006379|GO:0008334|GO:0045292|GO:0006370|GO:0034660|GO:0000387|GO:0050434|GO:0000398|GO:0030529|GO:0006446|GO:0005654|GO:0005845|GO:0031442|GO:0005846	100410504	chr9	100410445	+	hs|9q22.33	NM_002486	chr9:100410445-100410504	NM_002486	Hs.595669
A_23_P88303	-3.39358	-1.76281	3.39358	down	HSPA2	heat shock 70kDa protein 2	FALSE	Homo sapiens heat shock 70kDa protein 2 (HSPA2), mRNA [NM_021979]	3306	GO:0005515|GO:0006986|GO:0090084|GO:0051861|GO:0000795|GO:0009986|GO:0036128|GO:0007286|GO:0072562|GO:0005634|GO:0005524|GO:0005829|GO:0005739|GO:0042026|GO:0016020|GO:0070194|GO:0051082|GO:0031662|GO:0019899|GO:0001673|GO:0007141|GO:0070062|GO:0007140	65009597	chr14	65009538	+	hs|14q23.3	NM_021979	chr14:65009538-65009597	NM_021979	Hs.432648
A_33_P3211054	-3.39336	-1.76271	3.39336	down	ZNF684	zinc finger protein 684	FALSE	Homo sapiens zinc finger protein 684 (ZNF684), mRNA [NM_152373]	127396	GO:0006355|GO:0005634|GO:0003677|GO:0046872|GO:0006351	41007354	chr1	41007295	+	hs|1p34.2	NM_152373	chr1:41007295-41007354	NM_152373	Hs.524767
A_32_P231617	-3.39224	-1.76224	3.39224	down	TM4SF1	transmembrane 4 L six family member 1	FALSE	Homo sapiens transmembrane 4 L six family member 1 (TM4SF1), mRNA [NM_014220]	4071	GO:0008150|GO:0003674|GO:0005887	149093493	chr3	149093343	-	hs|3q25.1	NM_014220	chr3:149093493-149093343	NM_014220	Hs.351316
A_23_P99930	-3.38909	-1.7609	3.38909	down	TIPIN	TIMELESS interacting protein	FALSE	Homo sapiens TIMELESS interacting protein (TIPIN), transcript variant 1, mRNA [NM_017858]	54962	GO:0005515|GO:0000790|GO:0008284|GO:0005794|GO:0033262|GO:0048478|GO:0031573|GO:0005634|GO:0043231|GO:0005737|GO:0007067|GO:0000076|GO:0005654|GO:0009411|GO:0051301	66629272	chr15	66629213	-	hs|15q22.31	NM_017858	chr15:66629272-66629213	NM_017858	Hs.744308
A_23_P160934	-3.38499	-1.75915	3.38499	down	ANP32E	acidic (leucine-rich) nuclear phosphoprotein 32 family, member E	FALSE	Homo sapiens acidic (leucine-rich) nuclear phosphoprotein 32 family, member E (ANP32E), transcript variant 1, mRNA [NM_030920]	81611	GO:0042393|GO:0043486|GO:0016023|GO:0005634|GO:0019212|GO:0000812|GO:0043086	150204124	chr1	150202979	-	hs|1q21.2	NM_030920	chr1:150204124-150202979	NM_030920	Hs.656466
A_23_P316487	-3.38459	-1.75898	3.38459	down	H2AFV	H2A histone family, member V	FALSE	Homo sapiens H2A histone family, member V (H2AFV), transcript variant 2, mRNA [NM_138635]	94239	GO:0008150|GO:0003674|GO:0046982|GO:0005634|GO:0000786|GO:0003677|GO:0070062	44867532	chr7	44867473	-	hs|7p13	NM_138635	chr7:44867532-44867473	NM_138635	Hs.488189
A_23_P311192	-3.38	-1.75702	3.38	down	SPTLC1	serine palmitoyltransferase, long chain base subunit 1	FALSE	Homo sapiens serine palmitoyltransferase, long chain base subunit 1 (SPTLC1), transcript variant 2, mRNA [NM_178324]	10558	GO:0005515|GO:0006665|GO:0004758|GO:0006686|GO:0030148|GO:0035339|GO:0044281|GO:0030170|GO:0005789|GO:0016021|GO:0046513|GO:0017059|GO:0046512|GO:0046511	94841803	chr9	94841744	-	hs|9q22.31	NM_178324	chr9:94841803-94841744	NM_178324	Hs.90458
A_23_P43425	-3.37603	-1.75533	3.37603	down	C9orf40	chromosome 9 open reading frame 40	FALSE	Homo sapiens chromosome 9 open reading frame 40 (C9orf40), mRNA [NM_017998]	55071		77562057	chr9	77561998	-	hs|9q21.13	NM_017998	chr9:77562057-77561998	NM_017998	Hs.532296
A_23_P59877	-3.37528	-1.75501	3.37528	down	FABP5	fatty acid binding protein 5 (psoriasis-associated)	FALSE	Homo sapiens fatty acid binding protein 5 (psoriasis-associated) (FABP5), mRNA [NM_001444]	2171	GO:0005515|GO:0006629|GO:0005215|GO:0005504|GO:0005829|GO:0008289|GO:0005737|GO:0008544|GO:0015758|GO:0006006|GO:0005654|GO:0006656|GO:0070062	82196772	chr8	82196174	+	hs|8q21.13	NM_001444	chr8:82196174-82196772	NM_001444	Hs.408061
A_23_P54055	-3.37237	-1.75376	3.37237	down	AJUBA	ajuba LIM protein	FALSE	Homo sapiens ajuba LIM protein (AJUBA), transcript variant 1, mRNA [NM_032876]	84962	GO:0005515|GO:0035313|GO:0005886|GO:0030032|GO:2000637|GO:0005634|GO:0005829|GO:0016339|GO:0051015|GO:0031334|GO:0043406|GO:0000932|GO:0005911|GO:0048041|GO:0000086|GO:0043123|GO:0030334|GO:0033673|GO:0005667|GO:0001666|GO:0005815|GO:0045294|GO:0003714|GO:0000122|GO:0043087|GO:0006351|GO:0030027|GO:0035331|GO:1900037|GO:0035195|GO:0003682|GO:0008270|GO:0034613|GO:0000278|GO:0031328|GO:0005925|GO:…	23441306	chr14	23441247	-	hs|14q11.2	NM_032876	chr14:23441306-23441247	NM_032876	Hs.655832
A_33_P3346688	-3.37163	-1.75345	3.37163	down			FALSE	heat shock 70kDa protein 8 [Source:HGNC Symbol;Acc:HGNC:5241] [ENST00000527983]			122930046	chr11	122929987	-	hs|11q24.1	AK310467	chr11:122930046-122929987		Hs.180414
A_24_P190168	-3.37134	-1.75332	3.37134	down	TMEM97	transmembrane protein 97	FALSE	Homo sapiens transmembrane protein 97 (TMEM97), mRNA [NM_014573]	27346	GO:0042632|GO:0005791|GO:0005515|GO:0031965|GO:0005886|GO:0016021|GO:0005764|GO:0001558	26654983	chr17	26654924	+	hs|17q11.2	NM_014573	chr17:26654924-26654983	NM_014573	Hs.199695
A_23_P313389	-3.36402	-1.75019	3.36402	down	UGCG	UDP-glucose ceramide glucosyltransferase	FALSE	Homo sapiens UDP-glucose ceramide glucosyltransferase (UGCG), mRNA [NM_003358]	7357	GO:0008120|GO:0006665|GO:0016020|GO:0008544|GO:0006687|GO:0000139|GO:0006688|GO:0006679|GO:0044281|GO:0016021	114691947	chr9	114691888	+	hs|9q31.3	NM_003358	chr9:114691888-114691947	NM_003358	Hs.304249
A_23_P157795	-3.36376	-1.75008	3.36376	down	CTNNAL1	catenin (cadherin-associated protein), alpha-like 1	FALSE	Homo sapiens catenin (cadherin-associated protein), alpha-like 1 (CTNNAL1), transcript variant 1, mRNA [NM_003798]	8727	GO:0051015|GO:0045296|GO:0005886|GO:0007266|GO:0007155|GO:0005856|GO:0005829	111705064	chr9	111705005	-	hs|9q31.3	NM_003798	chr9:111705064-111705005	NM_003798	Hs.58488
A_24_P289043	-3.36293	-1.74972	3.36293	down			FALSE	heterogeneous nuclear ribonucleoprotein A1 pseudogene 41 [Source:HGNC Symbol;Acc:HGNC:48770] [ENST00000397777]			4944693	chr9	4944670	-	hs|9p24.1		chr9:4944693-4944670
A_33_P3234521	-3.3587	-1.7479	3.3587	down	DIS3L	DIS3 like exosome 3'-5' exoribonuclease	FALSE	DIS3 like exosome 3'-5' exoribonuclease [Source:HGNC Symbol;Acc:HGNC:28698] [ENST00000564909]	115752	GO:0005515|GO:0016075|GO:0005813|GO:0005737|GO:0005886|GO:0000175|GO:0003723|GO:0000177|GO:0019899	66618880	chr15	66618821	+	hs|15q22.31	AK123202	chr15:66618821-66618880		Hs.446251
A_33_P3331853	-3.35627	-1.74686	3.35627	down	PDE1C	phosphodiesterase 1C, calmodulin-dependent 70kDa	FALSE	Homo sapiens phosphodiesterase 1C, calmodulin-dependent 70kDa (PDE1C), transcript variant 1, mRNA [NM_001191056]	5137	GO:0007165|GO:0005516|GO:0048011|GO:0007173|GO:0008543|GO:0045087|GO:0004117|GO:0008152|GO:0007202|GO:0046872|GO:0005829	31855668	chr7	31855609	-	hs|7p14.3	NM_001191056	chr7:31855668-31855609	NM_001191056	Hs.728862
A_23_P408285	-3.356	-1.74674	3.356	down	PRICKLE1	prickle homolog 1 (Drosophila)	FALSE	Homo sapiens prickle homolog 1 (Drosophila) (PRICKLE1), transcript variant 1, mRNA [NM_153026]	144165	GO:0005515|GO:0031965|GO:2000691|GO:0032436|GO:0031398|GO:0001843|GO:0008270|GO:0005634|GO:0006606|GO:0090090|GO:0045892|GO:0005829	42853269	chr12	42853210	-	hs|12q12	NM_153026	chr12:42853269-42853210	NM_153026	Hs.720221
A_23_P370989	-3.35589	-1.74669	3.35589	down	MCM4	minichromosome maintenance complex component 4	FALSE	Homo sapiens minichromosome maintenance complex component 4 (MCM4), transcript variant 1, mRNA [NM_005914]	4173	GO:0005515|GO:0042555|GO:0005634|GO:0005524|GO:0006260|GO:0000082|GO:0006271|GO:0004003|GO:0003697|GO:0016020|GO:0006270|GO:0006268|GO:0005654|GO:0000278	48888393	chr8	48888334	+	hs|8q11.21	NM_005914	chr8:48888334-48888393	NM_005914	Hs.460184
A_33_P3319041	-3.35517	-1.74639	3.35517	down	HMGB3	high mobility group box 3	FALSE	Homo sapiens high mobility group box 3 (HMGB3), transcript variant 1, mRNA [NM_001301228]	3149	GO:0045578|GO:0006355|GO:0003690|GO:0045638|GO:0008301|GO:0005694|GO:0003682|GO:0007275|GO:0006338|GO:0006310|GO:0005634	150159239	chrX	150159180	+	hs|Xq28	NM_001301228	chrX:150159180-150159239	NM_001301228	Hs.19114
A_23_P110288	-3.35261	-1.74529	3.35261	down	GSTCD	glutathione S-transferase, C-terminal domain containing	FALSE	Homo sapiens glutathione S-transferase, C-terminal domain containing (GSTCD), transcript variant 2, mRNA [NM_024751]	79807	GO:0005515|GO:0008150|GO:0003674|GO:0070062	106744199	chr4	106744140	+	hs|4q24	NM_024751	chr4:106744140-106744199	NM_024751	Hs.161429
A_32_P831181	-3.35259	-1.74528	3.35259	down	BRI3BP	BRI3 binding protein	FALSE	Homo sapiens BRI3 binding protein (BRI3BP), mRNA [NM_080626]	140707	GO:0005739|GO:0005741|GO:0016021	125497181	chr12	125497122	+	hs|12q24.31	NM_080626	chr12:125497122-125497181	NM_080626	Hs.596464
A_33_P3382147	-3.35127	-1.74471	3.35127	down	STARD13	StAR-related lipid transfer (START) domain containing 13	FALSE	StAR-related lipid transfer (START) domain containing 13 [Source:HGNC Symbol;Acc:HGNC:19164] [ENST00000487412]	90627	GO:0043547|GO:0005811|GO:0005515|GO:0051056|GO:0031966|GO:0007264|GO:0008289|GO:0005829|GO:0005096	33712626	chr13	33712567	-	hs|13q13.1	AY082592	chr13:33712626-33712567		Hs.507704
A_23_P137173	-3.35104	-1.74461	3.35104	down	TMSB15A	thymosin beta 15a	FALSE	Homo sapiens thymosin beta 15a (TMSB15A), mRNA [NM_021992]	11013	GO:0003785|GO:0042989|GO:0005737|GO:0007015|GO:0005856	101768766	chrX	101768707	-	hs|Xq22.1	NM_021992	chrX:101768766-101768707	NM_021992	Hs.56145
A_23_P20615	-3.35041	-1.74434	3.35041	down	ANP32B	acidic (leucine-rich) nuclear phosphoprotein 32 family, member B	FALSE	Homo sapiens acidic (leucine-rich) nuclear phosphoprotein 32 family, member B (ANP32B), mRNA [NM_006401]	10541	GO:0048839|GO:0006919|GO:0005730|GO:0006334|GO:0005634|GO:0046827|GO:0042393|GO:0005737|GO:0021591|GO:0060021|GO:0045596|GO:0070063|GO:0001944|GO:0070062	100767303	chr9	100760959	+	hs|9q22.33	NM_006401	chr9:100760959-100767303	NM_006401	Hs.730654
A_33_P3419696	-3.34511	-1.74205	3.34511	down	FGF2	fibroblast growth factor 2 (basic)	FALSE	Homo sapiens fibroblast growth factor 2 (basic) (FGF2), mRNA [NM_002006]	2247	GO:0060045|GO:0005515|GO:0001658|GO:0048598|GO:0005615|GO:0010764|GO:0007173|GO:0006935|GO:0032958|GO:0043552|GO:0061045|GO:0030198|GO:0060548|GO:0009887|GO:0051781|GO:0070374|GO:0051209|GO:0005125|GO:0042056|GO:0043536|GO:0008543|GO:0045087|GO:0042060|GO:0014843|GO:0045893|GO:0008083|GO:0038095|GO:0043537|GO:0008286|GO:0008284|GO:0060591|GO:0002042|GO:0007265|GO:0005634|GO:0042660|GO:0000187|GO:…	123819390	chr4	123819331	+	hs|4q28.1	NM_002006	chr4:123819331-123819390	NM_002006	Hs.284244
A_23_P315815	-3.34504	-1.74202	3.34504	down	NRG1	neuregulin 1	FALSE	Homo sapiens neuregulin 1 (NRG1), transcript variant HRG-gamma, mRNA [NM_004495]	3084	GO:0060045|GO:0005515|GO:0043496|GO:0043497|GO:0031594|GO:0030307|GO:0055012|GO:0046579|GO:0030879|GO:0009790|GO:0005615|GO:0043624|GO:0007171|GO:0030297|GO:0030296|GO:0007173|GO:0014032|GO:0000165|GO:0060956|GO:0060379|GO:0051155|GO:0010667|GO:0055007|GO:0043125|GO:0003712|GO:0038127|GO:0045213|GO:0007416|GO:0005125|GO:2000727|GO:0045785|GO:0005176|GO:0008543|GO:0005887|GO:0045087|GO:0007422|GO:…	32585512	chr8	32474390	+	hs|8p12	NM_004495	chr8:32474390-32585512	NM_004495	Hs.453951
A_19_P00320387	-3.34423	-1.74168	3.34423	down	LINC01510	long intergenic non-protein coding RNA 1510	FALSE	long intergenic non-protein coding RNA 1510 [Source:HGNC Symbol;Acc:HGNC:51196] [ENST00000450063]	100996266		116211087	chr7	116211028	-	hs|7q31.2	XR_158832	chr7:116211087-116211028	XR_158832	Hs.607491
A_33_P3407691	-3.33912	-1.73947	3.33912	down			FALSE				1369	chrUn_gl000212	1310	-			chrUn_gl000212:000001369-000001310
A_33_P3224495	-3.33821	-1.73907	3.33821	down	KCNQ5-IT1	KCNQ5 intronic transcript 1 (non-protein coding)	FALSE	Homo sapiens KCNQ5 intronic transcript 1 (non-protein coding) (KCNQ5-IT1), long non-coding RNA [NR_120503]	100507381		73388218	chr6	73388159	+	hs|6q13	NR_120503	chr6:73388159-73388218	NR_120503	Hs.662412
A_24_P374973	-3.33743	-1.73874	3.33743	down			FALSE	ribosomal protein L7 pseudogene 14 [Source:HGNC Symbol;Acc:HGNC:35984] [ENST00000449851]			203905181	chr2	203905122	+	hs|2q33.2		chr2:203905122-203905181
A_23_P148798	-3.33314	-1.73688	3.33314	down	UCHL5	ubiquitin carboxyl-terminal hydrolase L5	FALSE	Homo sapiens ubiquitin carboxyl-terminal hydrolase L5 (UCHL5), transcript variant 1, mRNA [NM_015984]	51377	GO:0005515|GO:0006511|GO:0016579|GO:0000502|GO:0006355|GO:0004843|GO:0004866|GO:0005634|GO:0006310|GO:0048853|GO:0006351|GO:0005829|GO:0010951|GO:0031011|GO:0006281|GO:0021670|GO:0061136|GO:0070628|GO:0030901|GO:0007179|GO:0008242|GO:0030512	192985403	chr1	192985344	-	hs|1q31.2	NM_015984	chr1:192985403-192985344	NM_015984	Hs.145469
A_33_P3394858	-3.33061	-1.73579	3.33061	down	LINC00092	long intergenic non-protein coding RNA 92	FALSE	Homo sapiens long intergenic non-protein coding RNA 92 (LINC00092), long non-coding RNA [NR_024129]	100188953		98782990	chr9	98782931	-	hs|9q22.32	NR_024129	chr9:98782990-98782931	NR_024129	Hs.434310
A_19_P00315452	-3.32916	-1.73516	3.32916	down	LOC100130938	uncharacterized LOC100130938	FALSE	PREDICTED: Homo sapiens uncharacterized LOC100130938 (LOC100130938), transcript variant X1, ncRNA [XR_110148]	100130938		59273360	chr18	59273301	-	hs|18q21.33	XR_110148	chr18:59273360-59273301	XR_110148	Hs.710069
A_23_P91590	-3.32662	-1.73406	3.32662	down	RANBP1	RAN binding protein 1	FALSE	Homo sapiens RAN binding protein 1 (RANBP1), transcript variant 2, mRNA [NM_002882]	5902	GO:0043547|GO:0007165|GO:0050790|GO:0005737|GO:0008536|GO:0016032|GO:0046907|GO:0005634|GO:0005635|GO:0005092|GO:0005096	20114588	chr22	20114529	+	hs|22q11.21	NM_002882	chr22:20114529-20114588	NM_002882	Hs.24763
A_33_P3364626	-3.32325	-1.73259	3.32325	down	TMEM194B	transmembrane protein 194B	FALSE	transmembrane protein 194B [Source:HGNC Symbol;Acc:HGNC:33700] [ENST00000343105]	100131211	GO:0016021	191381049	chr2	191380990	-	hs|2q32.2		chr2:191381049-191380990
A_19_P00316205	-3.32244	-1.73224	3.32244	down	DLEU2	deleted in lymphocytic leukemia 2 (non-protein coding)	FALSE	Homo sapiens deleted in lymphocytic leukemia, 2, mRNA (cDNA clone IMAGE:5516523). [BC033120]	8847		50614252	chr13	50614193	-	hs|13q14.2	BC033120	chr13:50614252-50614193		Hs.547964
A_33_P3354607	-3.32043	-1.73137	3.32043	down	CCL4L2	chemokine (C-C motif) ligand 4-like 2	FALSE	Homo sapiens chemokine (C-C motif) ligand 4-like 2 (CCL4L2), transcript variant CCL4L2b2, mRNA [NM_001291470]	9560		34539966	chr17	34539907	+	hs|17q12	NM_001291470	chr17:34539907-34539966	NM_001291470	Hs.449862
A_33_P3359590	-3.31582	-1.72937	3.31582	down	DAZAP1	DAZ associated protein 1	FALSE	Homo sapiens DAZ associated protein 1 (DAZAP1), transcript variant 1, mRNA [NM_170711]	26528	GO:0048026|GO:0035613|GO:0005737|GO:0000166|GO:0008283|GO:0003723|GO:0001893|GO:0005654|GO:0007283|GO:0030154	1433826	chr19	1433767	+	hs|19p13.3	NM_170711	chr19:1433767-1433826	NM_170711	Hs.222510
A_33_P3266419	-3.31449	-1.72879	3.31449	down	GLTP	glycolipid transfer protein	FALSE	Homo sapiens glycolipid transfer protein (GLTP), mRNA [NM_016433]	51228	GO:0005737|GO:0051861|GO:0016020|GO:0017089|GO:0046836|GO:0070062|GO:0008289	110290419	chr12	110290361	-	hs|12q24.11	NM_016433	chr12:110290419-110290361	NM_016433	Hs.381256
A_33_P3286334	-3.31172	-1.72758	3.31172	down	SH3BP1	SH3-domain binding protein 1	FALSE	Homo sapiens SH3-domain binding protein 1 (SH3BP1), mRNA [NM_018957]	23616	GO:0043547|GO:0007165|GO:0017124|GO:0005737|GO:0005096	38043347	chr22	38043288	+	hs|22q13.1	NM_018957	chr22:38043288-38043347	NM_018957	Hs.601143
A_33_P3213707	-3.30086	-1.72284	3.30086	down	PDCD1LG2	programmed cell death 1 ligand 2	FALSE	Homo sapiens programmed cell death 1 ligand 2 (PDCD1LG2), mRNA [NM_025239]	80380	GO:0003674|GO:0006955|GO:0005886|GO:0032693|GO:0046007|GO:0042102|GO:0031295|GO:0016021|GO:0032689|GO:0070062|GO:0012505	5557751	chr9	5557692	+	hs|9p24.1	NM_025239	chr9:5557692-5557751	NM_025239	Hs.532279
A_33_P3264926	-3.29956	-1.72227	3.29956	down	SAMD4A	sterile alpha motif domain containing 4A	FALSE	Homo sapiens sterile alpha motif domain containing 4A (SAMD4A), transcript variant 1, mRNA [NM_015589]	23034	GO:0017148|GO:0005737|GO:0030054|GO:0045202|GO:0045727|GO:0030371|GO:0030425	55251335	chr14	55251276	+	hs|14q22.2	NM_015589	chr14:55251276-55251335	NM_015589	Hs.98259
A_19_P00319467	-3.29955	-1.72227	3.29955	down			FALSE	EST366269 MAGE resequences, MAGC Homo sapiens cDNA, mRNA sequence [AW954199]			130589601	chr7	130589542	-	hs|7q32.3	AW954199	chr7:130589601-130589542		Hs.658407
A_33_P3367615	-3.29828	-1.72172	3.29828	down	KLF6	Kruppel-like factor 6	FALSE	Homo sapiens Kruppel-like factor 6 (KLF6), transcript variant B, mRNA [NM_001160124]	1316	GO:0005737|GO:0030183|GO:0019221|GO:0005634|GO:0045893|GO:0003677|GO:0046872|GO:0006351	3827429	chr10	3827370	-	hs|10p15.1	NM_001160124	chr10:3827429-3827370	NM_001160124	Hs.4055
A_24_P373286	-3.29426	-1.71995	3.29426	down	CCP110	centriolar coiled coil protein 110kDa	FALSE	Homo sapiens centriolar coiled coil protein 110kDa (CCP110), transcript variant 2, mRNA [NM_014711]	9738	GO:0005515|GO:0051298|GO:0043234|GO:0005813|GO:0032465|GO:0006996|GO:0007099|GO:0005814|GO:0000086|GO:0030030|GO:0000278|GO:0005829	19564559	chr16	19564500	+	hs|16p12.3	NM_014711	chr16:19564500-19564559	NM_014711	Hs.279912
A_24_P73389	-3.29395	-1.71982	3.29395	down	STK24	serine/threonine kinase 24	FALSE	Homo sapiens serine/threonine kinase 24 (STK24), transcript variant 2, mRNA [NM_001032296]	8428	GO:0023014|GO:0005515|GO:0042542|GO:0030336|GO:0008631|GO:0005730|GO:0097194|GO:0006915|GO:0005634|GO:0005524|GO:0048679|GO:0046872|GO:0006921|GO:0005829|GO:0007165|GO:0005737|GO:0046777|GO:0004672|GO:0016020|GO:0004702|GO:0004674|GO:0005654|GO:0006468|GO:0070062	99114112	chr13	99114053	-	hs|13q32.2	NM_001032296	chr13:99114112-99114053	NM_001032296	Hs.508514
A_33_P3263157	-3.29102	-1.71854	3.29102	down			FALSE	high mobility group nucleosomal binding domain 2 pseudogene 30 [Source:HGNC Symbol;Acc:HGNC:39397] [ENST00000423237]			42153207	chr7	42153148	+	hs|7p14.1		chr7:42153148-42153207
A_32_P85676	-3.29009	-1.71813	3.29009	down	STK32B	serine/threonine kinase 32B	FALSE	Homo sapiens serine/threonine kinase 32B (STK32B), mRNA [NM_018401]	55351	GO:0004674|GO:0006468|GO:0005524|GO:0046872	5502129	chr4	5502070	+	hs|4p16.2	NM_018401	chr4:5502070-5502129	NM_018401	Hs.133062
A_33_P3313796	-3.27919	-1.71334	3.27919	down	CCDC34	coiled-coil domain containing 34	FALSE	Homo sapiens coiled-coil domain containing 34 (CCDC34), transcript variant 1, mRNA [NM_030771]	91057		27360176	chr11	27360117	-	hs|11p14.1	NM_030771	chr11:27360176-27360117	NM_030771	Hs.143733
A_24_P226755	-3.2783	-1.71295	3.2783	down	TOX	thymocyte selection-associated high mobility group box	FALSE	Homo sapiens thymocyte selection-associated high mobility group box (TOX), mRNA [NM_014729]	9760	GO:0006355|GO:0003682|GO:0006338|GO:0005634|GO:0003677	59718581	chr8	59718522	-	hs|8q12.1	NM_014729	chr8:59718581-59718522	NM_014729	Hs.491805
A_33_P3275500	-3.27263	-1.71045	3.27263	down	LOC400743	uncharacterized LOC400743	FALSE		400743		17524092	chr1	17524033	+	hs|1p36.13		chr1:17524033-17524092		Hs.522935
A_24_P195286	-3.27216	-1.71024	3.27216	down			FALSE	high mobility group box 3 pseudogene 30 [Source:HGNC Symbol;Acc:HGNC:39333] [ENST00000457863]			111933583	chrX	111933524	+	hs|Xq23		chrX:111933524-111933583
A_19_P00806298	-3.27155	-1.70997	3.27155	down			FALSE	BX098869 Soares_fetal_liver_spleen_1NFLS_S1 Homo sapiens cDNA clone IMAGp998P22975, mRNA sequence [BX098869]			50559625	chr13	50559566	-	hs|13q14.2	BX098869	chr13:50559625-50559566		Hs.687694
A_33_P3257558	-3.27144	-1.70993	3.27144	down	CNTRL	centriolin	FALSE	centriolin [Source:HGNC Symbol;Acc:HGNC:1858] [ENST00000491018]	11064	GO:0005515|GO:0005813|GO:0005737|GO:0006996|GO:0016020|GO:0000086|GO:0000278|GO:0051301|GO:0005829	123923783	chr9	123923724	+	hs|9q33.2		chr9:123923724-123923783
A_23_P348298	-3.27053	-1.70952	3.27053	down	SAC3D1	SAC3 domain containing 1	FALSE	Homo sapiens SAC3 domain containing 1 (SAC3D1), mRNA [NM_013299]	29901	GO:0005515|GO:0007067|GO:0005737|GO:0005815|GO:0005819|GO:0051301	64812149	chr11	64812090	+	hs|11q13.1	NM_013299	chr11:64812090-64812149	NM_013299	Hs.23642
A_24_P3005	-3.26476	-1.70697	3.26476	down	SCN9A	sodium channel, voltage gated, type IX alpha subunit	FALSE	Homo sapiens sodium channel, voltage gated, type IX alpha subunit (SCN9A), mRNA [NM_002977]	6335	GO:0005886|GO:0086010|GO:0005248|GO:0009636|GO:0009791|GO:0031402|GO:0019228|GO:0006954|GO:0001518|GO:0034765|GO:0035725|GO:0006814|GO:0048266	167055617	chr2	167055558	-	hs|2q24.3	NM_002977	chr2:167055617-167055558	NM_002977	Hs.439145
A_23_P115375	-3.26336	-1.70636	3.26336	down	HIST2H3D	histone cluster 2, H3d	FALSE	Homo sapiens histone cluster 2, H3d (HIST2H3D), mRNA [NM_001123375]	653604	GO:0005515|GO:0010467|GO:0046982|GO:0005576|GO:0005634|GO:0003677|GO:0032776|GO:0000183|GO:0007596|GO:0045814|GO:0040029|GO:0005654|GO:0000786|GO:0070062	120905040	chr1	120904981	+	hs|1p11.2	NM_001123375	chr1:120904981-120905040	NM_001123375	Hs.712062
A_19_P00803685	-3.26037	-1.70504	3.26037	down	ANKRD33B	ankyrin repeat domain 33B	FALSE	Homo sapiens ankyrin repeat domain 33B (ANKRD33B), mRNA [NM_001164440]	651746		10657730	chr5	10657671	+	hs|5p15.2		chr5:10657671-10657730	NM_001164440	Hs.26039
A_23_P74737	-3.25872	-1.7043	3.25872	down	EYA3	EYA transcriptional coactivator and phosphatase 3	FALSE	Homo sapiens EYA transcriptional coactivator and phosphatase 3 (EYA3), transcript variant 1, mRNA [NM_001990]	2140	GO:0005515|GO:0005667|GO:0005813|GO:0006355|GO:0016576|GO:0005634|GO:0007275|GO:0045739|GO:0009653|GO:0046872|GO:0035335|GO:0006351|GO:0006302|GO:0005737|GO:0010212|GO:0003682|GO:0005654|GO:0008138|GO:0007601|GO:0004725	28330876	chr1	28326531	-	hs|1p35.3	NM_001990	chr1:28330876-28326531	NM_001990	Hs.185774
A_24_P348861	-3.25763	-1.70382	3.25763	down	TTTY15	testis-specific transcript, Y-linked 15 (non-protein coding)	FALSE	Homo sapiens testis-specific transcript, Y-linked 15 (non-protein coding) (TTTY15), long non-coding RNA [NR_001545]	64595		14804038	chrY	14803979	+	hs|Yq11.21	NR_001545	chrY:14803979-14804038	NR_001545	Hs.433656
A_23_P91943	-3.25248	-1.70154	3.25248	down	IL12A	interleukin 12A	FALSE	Homo sapiens interleukin 12A (IL12A), mRNA [NM_000882]	3592	GO:0005515|GO:0050830|GO:0042520|GO:0005615|GO:0032816|GO:0045513|GO:0006955|GO:0005737|GO:0042102|GO:0051135|GO:0032496|GO:0007050|GO:0045582|GO:0032729|GO:0046982|GO:0005143|GO:0042163|GO:0050671|GO:0042832|GO:0048662|GO:0097191|GO:0009615|GO:0005125|GO:0045785|GO:0032700|GO:0032946|GO:0016477|GO:0010224|GO:0043514|GO:0001916|GO:0045954|GO:0034393|GO:0002860|GO:0008083	159713290	chr3	159713231	+	hs|3q25.33	NM_000882	chr3:159713231-159713290	NM_000882	Hs.673
A_24_P188325	-3.25044	-1.70063	3.25044	down	UCHL5	ubiquitin carboxyl-terminal hydrolase L5	FALSE	Homo sapiens ubiquitin carboxyl-terminal hydrolase L5 (UCHL5), transcript variant 1, mRNA [NM_015984]	51377	GO:0005515|GO:0006511|GO:0016579|GO:0000502|GO:0006355|GO:0004843|GO:0004866|GO:0005634|GO:0006310|GO:0048853|GO:0006351|GO:0005829|GO:0010951|GO:0031011|GO:0006281|GO:0021670|GO:0061136|GO:0070628|GO:0030901|GO:0007179|GO:0008242|GO:0030512	192990312	chr1	192990253	-	hs|1q31.2	NM_015984	chr1:192990312-192990253	NM_015984	Hs.145469
A_24_P409661	-3.25025	-1.70055	3.25025	down			FALSE				78557688	chr1	78557627	+	hs|1p31.1		chr1:78557627-78557688
A_33_P3357322	-3.24925	-1.70011	3.24925	down	SMC2	structural maintenance of chromosomes 2	FALSE	Homo sapiens structural maintenance of chromosomes 2 (SMC2), transcript variant 1, mRNA [NM_001042550]	10592	GO:0000796|GO:0005515|GO:0000793|GO:0007076|GO:0010032|GO:0046982|GO:0005634|GO:0051383|GO:0000228|GO:0005524|GO:0005829|GO:0005737|GO:0045132|GO:0005654|GO:0000278|GO:0070062|GO:0051301	106903683	chr9	106903624	+	hs|9q31.1	NM_001042550	chr9:106903624-106903683	NM_001042550	Hs.119023
A_33_P3344277	-3.24874	-1.69988	3.24874	down	HS1BP3	HCLS1 binding protein 3	FALSE	Homo sapiens HCLS1 binding protein 3, mRNA (cDNA clone IMAGE:5574764), with apparent retained intron. [BC057389]	64342	GO:0035091	20834599	chr2	20834540	-	hs|2p24.1	BC057389	chr2:20834599-20834540
A_33_P3276282	-3.24854	-1.69979	3.24854	down	PTPRF	protein tyrosine phosphatase, receptor type, F	FALSE	protein tyrosine phosphatase, receptor type, F [Source:HGNC Symbol;Acc:HGNC:9670] [ENST00000617451]	5792	GO:0016477|GO:0005887|GO:0005001|GO:0007185|GO:0007155|GO:1900121|GO:0032403|GO:0008201|GO:0035335|GO:0004725|GO:0070062	44044956	chr1	44044897	+	hs|1p34.2	BC048416	chr1:44044897-44044956		Hs.272062
A_24_P389994	-3.24826	-1.69967	3.24826	down	NADK	NAD kinase	FALSE	Homo sapiens NAD kinase (NADK), transcript variant 1, mRNA [NM_023018]	65220	GO:0016310|GO:0006741|GO:0046034|GO:0003951|GO:0006766|GO:0019674|GO:0006767|GO:0044281|GO:0005524|GO:0046872|GO:0005829	1685079	chr1	1685020	-	hs|1p36.33	NM_023018	chr1:1685079-1685020	NM_023018	Hs.654792
A_33_P3286196	-3.24815	-1.69962	3.24815	down	KRTAP2-2	keratin associated protein 2-2	FALSE	Homo sapiens keratin associated protein 2-2 (KRTAP2-2), mRNA [NM_033032]	728279		39210811	chr17	39210752	-	hs|17q21.2	NM_033032	chr17:39210811-39210752	NM_033032	Hs.650131
A_33_P3255794	-3.24696	-1.69909	3.24696	down	POLE	polymerase (DNA directed), epsilon, catalytic subunit	FALSE	Homo sapiens polymerase (DNA directed), epsilon, catalytic subunit (POLE), mRNA [NM_006231]	5426	GO:0008622|GO:0005886|GO:0003887|GO:0005634|GO:0005737|GO:0000082|GO:0000723|GO:0000166|GO:0006270|GO:0000722|GO:0006297|GO:0051539|GO:0003677|GO:0001701|GO:0006260|GO:0006281|GO:0006283|GO:0003682|GO:0000731|GO:0006287|GO:0005654|GO:0008270|GO:0006289|GO:0000278|GO:0032201	133234007	chr12	133233948	-	hs|12q24.33	NM_006231	chr12:133234007-133233948	NM_006231	Hs.524871
A_33_P3220376	-3.24688	-1.69905	3.24688	down			FALSE	NP1L1_HUMAN (P55209) Nucleosome assembly protein 1-like 1 (NAP-1-related protein) (hNRP), partial (38%) [THC2591311]			75614817	chr15	75614758	+	hs|15q24.2		chr15:075614758-075614817
A_24_P206328	-3.24273	-1.69721	3.24273	down	PDE1C	phosphodiesterase 1C, calmodulin-dependent 70kDa	FALSE	Homo sapiens phosphodiesterase 1C, calmodulin-dependent 70kDa (PDE1C), transcript variant 4, mRNA [NM_005020]	5137	GO:0007165|GO:0005516|GO:0048011|GO:0007173|GO:0008543|GO:0045087|GO:0004117|GO:0008152|GO:0007202|GO:0046872|GO:0005829	31855645	chr7	31855586	-	hs|7p14.3	NM_005020	chr7:31855645-31855586	NM_005020	Hs.728862
A_33_P3283863	-3.2407	-1.6963	3.2407	down	TENM1	teneurin transmembrane protein 1	FALSE	Homo sapiens teneurin transmembrane protein 1 (TENM1), transcript variant 1, mRNA [NM_001163278]	10178	GO:0048471|GO:0008285|GO:0005886|GO:0005783|GO:0051491|GO:0005634|GO:0016363|GO:0042803|GO:0006955|GO:0005737|GO:0033138|GO:0030838|GO:0007218|GO:0043406|GO:0005856|GO:0008201|GO:0005794|GO:0046982|GO:0006359|GO:0005576|GO:0090316|GO:0006351|GO:0007399|GO:0016607|GO:0005887	123512026	chrX	123511967	-	hs|Xq25	NM_001163278	chrX:123512026-123511967	NM_001163278	Hs.23796
A_23_P66798	-3.23475	-1.69366	3.23475	down	KRT19	keratin 19, type I	FALSE	Homo sapiens keratin 19, type I (KRT19), mRNA [NM_002276]	3880	GO:0005515|GO:0005882|GO:0030018|GO:0043627|GO:0060706|GO:0045214|GO:0032403|GO:0071944|GO:0042383|GO:0016010|GO:0005200|GO:0043034|GO:0016032|GO:0008307|GO:0070062	39679977	chr17	39679918	-	hs|17q21.2	NM_002276	chr17:39679977-39679918	NM_002276	Hs.654568
A_24_P75680	-3.23356	-1.69312	3.23356	down	SLC4A8	solute carrier family 4, sodium bicarbonate cotransporter, member 8	FALSE	Homo sapiens solute carrier family 4, sodium bicarbonate cotransporter, member 8 (SLC4A8), transcript variant 4, mRNA [NM_001258402]	9498	GO:0043005|GO:0005886|GO:0005452|GO:0005887|GO:0051453|GO:0015701|GO:0035725|GO:0055085|GO:0008510|GO:0032809|GO:0006811	51865261	chr12	51865202	+	hs|12q13.13	NM_001258402	chr12:51865202-51865261	NM_001258402	Hs.4749
A_24_P108301	-3.23346	-1.69308	3.23346	down	RTTN	rotatin	FALSE	Homo sapiens rotatin (RTTN), mRNA [NM_173630]	25914	GO:0007368|GO:0005737|GO:0036064	67671163	chr18	67671104	-	hs|18q22.2	NM_173630	chr18:67671163-67671104	NM_173630	Hs.654809
A_24_P389415	-3.23329	-1.693	3.23329	down	PNMA2	paraneoplastic Ma antigen 2	FALSE	Homo sapiens paraneoplastic Ma antigen 2 (PNMA2), mRNA [NM_007257]	10687	GO:0005515|GO:0043065|GO:0005730	26362941	chr8	26362882	-	hs|8p21.2	NM_007257	chr8:26362941-26362882	NM_007257	Hs.591838
A_19_P00806098	-3.23151	-1.69221	3.23151	down	LOC100130938	uncharacterized LOC100130938	FALSE	PREDICTED: Homo sapiens uncharacterized LOC100130938 (LOC100130938), transcript variant X1, ncRNA [XR_110148]	100130938		59273546	chr18	59273487	-	hs|18q21.33	XR_110148	chr18:59273546-59273487	XR_110148	Hs.710069
A_19_P00321670	-3.22957	-1.69134	3.22957	down			FALSE	zt85h04.r1 Soares_testis_NHT Homo sapiens cDNA clone IMAGE:729175 5', mRNA sequence [AA397666]			43819919	chr6	43819860	-	hs|6p21.1		chr6:43819919-43819860		Hs.634195
A_33_P3381022	-3.22759	-1.69046	3.22759	down	ICMT	isoprenylcysteine carboxyl methyltransferase	FALSE	isoprenylcysteine carboxyl methyltransferase [Source:HGNC Symbol;Acc:HGNC:5350] [ENST00000489498]	23463	GO:0008284|GO:0005783|GO:0046578|GO:0001701|GO:0001889|GO:0004671|GO:0008140|GO:0035264|GO:0016020|GO:0006481|GO:0006612|GO:0003880|GO:0005789|GO:0016021|GO:0006464	6294564	chr1	6294505	-	hs|1p36.31	BC017037	chr1:6294564-6294505
A_33_P3832852	-3.22534	-1.68945	3.22534	down	HAUS2	HAUS augmin-like complex, subunit 2	FALSE	Homo sapiens HAUS augmin-like complex, subunit 2 (HAUS2), transcript variant 1, mRNA [NM_018097]	55142	GO:0005813|GO:0005794|GO:0006996|GO:0005874|GO:0005819|GO:0051225|GO:0005829|GO:0051297|GO:0003674|GO:0005737|GO:0007067|GO:0000086|GO:0070652|GO:0005654|GO:0000278|GO:0051301	42861046	chr15	42860987	+	hs|15q15.2	NM_018097	chr15:42860987-42861046	NM_018097	Hs.14347
A_23_P411851	-3.22469	-1.68916	3.22469	down	SYNE3	spectrin repeat containing, nuclear envelope family member 3	FALSE	Homo sapiens spectrin repeat containing, nuclear envelope family member 3 (SYNE3), mRNA [NM_152592]	161176	GO:0005791|GO:0005640|GO:0005515|GO:0051015|GO:0016020|GO:0090150|GO:0008360|GO:0007010|GO:0034993|GO:0090286|GO:0016021|GO:0005635	95884017	chr14	95883958	-	hs|14q32.13	NM_152592	chr14:95884017-95883958	NM_152592	Hs.354645
A_23_P165414	-3.22372	-1.68873	3.22372	down	KLHL23	kelch-like family member 23	FALSE	Homo sapiens kelch-like family member 23 (KLHL23), mRNA [NM_144711]	151230	GO:0005515	170606043	chr2	170605984	+	hs|2q31.1	NM_144711	chr2:170605984-170606043	NM_144711	Hs.655150
A_23_P20823	-3.22348	-1.68862	3.22348	down	WDR34	WD repeat domain 34	FALSE	Homo sapiens WD repeat domain 34 (WDR34), mRNA [NM_052844]	89891	GO:0005737|GO:0006996|GO:0005814|GO:0005930|GO:0072372|GO:0036064	131396209	chr9	131396150	-	hs|9q34.11	NM_052844	chr9:131396209-131396150	NM_052844	Hs.495240
A_33_P3250895	-3.21587	-1.68521	3.21587	down	PSMB11	proteasome (prosome, macropain) subunit, beta type, 11	FALSE	Homo sapiens proteasome (prosome, macropain) subunit, beta type, 11 (PSMB11), mRNA [NM_001099780]	122706	GO:0000209|GO:0002474|GO:0010467|GO:0043066|GO:0005839|GO:0006521|GO:0090263|GO:0051437|GO:0042590|GO:0006915|GO:0042981|GO:0005634|GO:0044281|GO:0031145|GO:0051439|GO:0004298|GO:0005829|GO:0034641|GO:0002479|GO:0016032|GO:0000278|GO:0090090|GO:0006977	23512194	chr14	23512135	+	hs|14q11.2	NM_001099780	chr14:23512135-23512194	NM_001099780	Hs.508918
A_33_P3273063	-3.2154	-1.685	3.2154	down	NUP43	nucleoporin 43kDa	FALSE	Homo sapiens nucleoporin 43kDa (NUP43), transcript variant 1, mRNA [NM_198887]	348995	GO:0007077|GO:0005515|GO:0010467|GO:0019221|GO:0019058|GO:0005635|GO:0044281|GO:0015031|GO:0008645|GO:0005829|GO:0007059|GO:0015758|GO:0016032|GO:0005975|GO:0019083|GO:0055085|GO:0010827|GO:0007067|GO:0031080|GO:0009405|GO:0000777|GO:0000776|GO:0051028|GO:0000278|GO:0051301	150057672	chr6	150057613	-	hs|6q25.1	NM_198887	chr6:150057672-150057613	NM_198887	Hs.510375
A_24_P281643	-3.21365	-1.68421	3.21365	down			FALSE	ATP-binding cassette, sub-family B (MDR/TAP), member 10 pseudogene 4 [Source:HGNC Symbol;Acc:HGNC:31130] [ENST00000566803]			22691052	chr15	22691017	-	hs|15q11.2		chr15:22691052-22691017
A_23_P115838	-3.21303	-1.68393	3.21303	down	C10orf12	chromosome 10 open reading frame 12	FALSE	Homo sapiens chromosome 10 open reading frame 12 (C10orf12), mRNA [NM_015652]	26148		98745115	chr10	98745056	+	hs|10q24.1	NM_015652	chr10:98745056-98745115	NM_015652	Hs.427927
A_23_P58082	-3.2091	-1.68217	3.2091	down	CCDC80	coiled-coil domain containing 80	FALSE	Homo sapiens coiled-coil domain containing 80 (CCDC80), transcript variant 1, mRNA [NM_199511]	151887	GO:0030198|GO:0010811|GO:0005614|GO:0001968|GO:0008201|GO:0005604	112324535	chr3	112324476	-	hs|3q13.2	NM_199511	chr3:112324535-112324476	NM_199511	Hs.477128
A_23_P141624	-3.20655	-1.68102	3.20655	down	KRTAP1-1	keratin associated protein 1-1	FALSE	Homo sapiens keratin associated protein 1-1 (KRTAP1-1), mRNA [NM_030967]	81851	GO:0008150|GO:0045095	39196937	chr17	39196878	-	hs|17q21.2	NM_030967	chr17:39196937-39196878	NM_030967	Hs.247934
A_23_P50399	-3.20511	-1.68038	3.20511	down	DCAF15	DDB1 and CUL4 associated factor 15	FALSE	Homo sapiens DDB1 and CUL4 associated factor 15 (DCAF15), mRNA [NM_138353]	90379	GO:0016567	14071201	chr19	14071142	+	hs|19p13.12	NM_138353	chr19:14071142-14071201	NM_138353	Hs.443636
A_33_P3289025	-3.20458	-1.68014	3.20458	down	EVA1A	eva-1 homolog A (C. elegans)	FALSE	Homo sapiens eva-1 homolog A (C. elegans) (EVA1A), transcript variant 1, mRNA [NM_001135032]	84141	GO:0005886|GO:0006914|GO:0005789|GO:0006915|GO:0016021|GO:0005765|GO:0043231	75745242	chr2	75745183	-	hs|2p12	NM_001135032	chr2:75745242-75745183	NM_001135032	Hs.302346
A_23_P166686	-3.20396	-1.67986	3.20396	down	AMOTL2	angiomotin like 2	FALSE	Homo sapiens angiomotin like 2 (AMOTL2), transcript variant 2, mRNA [NM_016201]	51421	GO:0005515|GO:0016324|GO:0035329|GO:0031410|GO:0005923|GO:0055037|GO:0016055|GO:0042802|GO:0005829	134074801	chr3	134074742	-	hs|3q22.2	NM_016201	chr3:134074801-134074742	NM_016201	Hs.426312
A_23_P28169	-3.20132	-1.67867	3.20132	down	ARL6IP6	ADP-ribosylation factor-like 6 interacting protein 6	FALSE	Homo sapiens ADP-ribosylation factor-like 6 interacting protein 6 (ARL6IP6), transcript variant 1, mRNA [NM_152522]	151188	GO:0016021	153616847	chr2	153616788	+	hs|2q23.3	NM_152522	chr2:153616788-153616847	NM_152522	Hs.744874
A_33_P3406811	-3.2009	-1.67848	3.2009	down			FALSE				39347105	chr17	39347046	+	hs|17q21.2		chr17:039347046-039347105
A_33_P3249439	-3.19717	-1.6768	3.19717	down	NCAPH2	non-SMC condensin II complex, subunit H2	FALSE	Homo sapiens non-SMC condensin II complex, subunit H2 (NCAPH2), transcript variant 3, mRNA [NM_001185011]	29781	GO:0005515|GO:0016020|GO:0030261|GO:0005694|GO:0005654|GO:0000278	50961892	chr22	50961833	+	hs|22q13.33	NM_001185011	chr22:50961833-50961892	NM_001185011	Hs.730607
A_23_P96165	-3.19702	-1.67673	3.19702	down	C11orf80	chromosome 11 open reading frame 80	FALSE	Homo sapiens chromosome 11 open reading frame 80 (C11orf80), transcript variant 1, mRNA [NM_024650]	79703		66583535	chr11	66581439	+	hs|11q13.2	NM_024650	chr11:66581439-66583535	NM_024650	Hs.292088
A_24_P223384	-3.19615	-1.67634	3.19615	down	HIST1H2AB	histone cluster 1, H2ab	FALSE	Homo sapiens histone cluster 1, H2ab (HIST1H2AB), mRNA [NM_003513]	8335	GO:0008150|GO:0046982|GO:0005634|GO:0000786|GO:0003677|GO:0070062	26033520	chr6	26033461	-	hs|6p22.2	NM_003513	chr6:26033520-26033461	NM_003513	Hs.248174
A_24_P410610	-3.1923	-1.6746	3.1923	down	DPYD	dihydropyrimidine dehydrogenase	FALSE	Homo sapiens dihydropyrimidine dehydrogenase (DPYD), transcript variant 2, mRNA [NM_001160301]	1806	GO:0050661|GO:0017113|GO:0006214|GO:0051539|GO:0006210|GO:0050660|GO:0006212|GO:0006222|GO:0055086|GO:0044281|GO:0046872|GO:0042803|GO:0005829|GO:0019483|GO:0046135|GO:0005737|GO:0006145|GO:0004152|GO:0006206|GO:0055114|GO:0006208	98186292	chr1	98186233	-	hs|1p21.3	NM_001160301	chr1:98186292-98186233	NM_001160301	Hs.335034
A_23_P63402	-3.19217	-1.67454	3.19217	down	GPSM2	G-protein signaling modulator 2	FALSE	Homo sapiens G-protein signaling modulator 2 (GPSM2), mRNA [NM_013296]	29899	GO:0005515|GO:0050790|GO:0005737|GO:0007186|GO:0060487|GO:0000132|GO:0045177|GO:0005938|GO:0042802|GO:0030695	109466813	chr1	109466754	+	hs|1p13.3	NM_013296	chr1:109466754-109466813	NM_013296	Hs.584901
A_23_P76705	-3.19056	-1.67381	3.19056	down	TUBGCP3	tubulin, gamma complex associated protein 3	FALSE	Homo sapiens tubulin, gamma complex associated protein 3 (TUBGCP3), transcript variant 1, mRNA [NM_006322]	10426	GO:0005515|GO:0005827|GO:0005813|GO:0043015|GO:0005814|GO:0005819|GO:0005829|GO:0007338|GO:0005737|GO:0016020|GO:0005198|GO:0000086|GO:0007020|GO:0005200|GO:0000278	113158954	chr13	113158433	-	hs|13q34	NM_006322	chr13:113158954-113158433	NM_006322	Hs.224152
A_24_P319942	-3.19047	-1.67377	3.19047	down	SSR3	signal sequence receptor, gamma (translocon-associated protein gamma)	FALSE	Homo sapiens signal sequence receptor, gamma (translocon-associated protein gamma) (SSR3), mRNA [NM_007107]	6747	GO:0010467|GO:0005784|GO:0006614|GO:0030176|GO:0044267|GO:0006412	156259127	chr3	156259068	-	hs|3q25.31	NM_007107	chr3:156259127-156259068	NM_007107	Hs.518346
A_33_P3607359	-3.19013	-1.67362	3.19013	down	LOC399815	chromosome 10 open reading frame 88 pseudogene	FALSE	Homo sapiens chromosome 10 open reading frame 88 pseudogene (LOC399815), non-coding RNA [NR_027282]	399815		124648124	chr10	124648065	+	hs|10q26.13	NR_027282	chr10:124648065-124648124	NR_027282	Hs.113871
A_23_P90612	-3.18823	-1.67276	3.18823	down	MCM6	minichromosome maintenance complex component 6	FALSE	Homo sapiens minichromosome maintenance complex component 6 (MCM6), mRNA [NM_005915]	4175	GO:0005515|GO:0042555|GO:0005634|GO:0005524|GO:0042802|GO:0006260|GO:0000082|GO:0006271|GO:0004003|GO:0003697|GO:0006270|GO:0006268|GO:0005654|GO:0000278	136598276	chr2	136598217	-	hs|2q21.3	NM_005915	chr2:136598276-136598217	NM_005915	Hs.444118
A_33_P3362321	-3.18668	-1.67205	3.18668	down	FHL2	four and a half LIM domains 2	FALSE	Homo sapiens four and a half LIM domains 2 (FHL2), transcript variant 2, mRNA [NM_201555]	2274	GO:0005515|GO:0043066|GO:0030018|GO:0003713|GO:0005634|GO:0050681|GO:0044281|GO:0000122|GO:0015629|GO:0031430|GO:0001649|GO:0006351|GO:0042802|GO:0060347|GO:0055015|GO:0005654|GO:0008270|GO:0055014|GO:0009725|GO:0045893|GO:0005925|GO:0044255|GO:0030521|GO:0008134	105990080	chr2	105990021	-	hs|2q12.1	NM_201555	chr2:105990080-105990021	NM_201555	Hs.443687
A_19_P00803122	-3.186	-1.67175	3.186	down			FALSE				39968102	chr6	39968043	+	hs|6p21.2		chr6:039968043-039968102
A_33_P3335935	-3.18594	-1.67172	3.18594	down	HN1L	hematological and neurological expressed 1-like	FALSE	Homo sapiens hematological and neurological expressed 1-like (HN1L), mRNA [NM_144570]	90861	GO:0005737|GO:0005886|GO:0005634	1749885	chr16	1749826	+	hs|16p13.3	NM_144570	chr16:1749826-1749885	NM_144570	Hs.513261
A_23_P59358	-3.18105	-1.6695	3.18105	down	CEP57L1	centrosomal protein 57kDa-like 1	FALSE	Homo sapiens centrosomal protein 57kDa-like 1 (CEP57L1), transcript variant 2, mRNA [NM_173830]	285753	GO:0008017|GO:0008150|GO:0003674|GO:0005737|GO:0043015|GO:0034453|GO:0005815|GO:0005874|GO:0005575|GO:0042802	109475056	chr6	109471404	+	hs|6q21	NM_173830	chr6:109471404-109475056	NM_173830	Hs.632616
A_23_P144684	-3.17819	-1.6682	3.17819	down	ANKRD32	ankyrin repeat domain 32	FALSE	Homo sapiens ankyrin repeat domain 32 (ANKRD32), mRNA [NM_032290]	84250	GO:0005813|GO:0005634	94031226	chr5	94031167	+	hs|5q15	NM_032290	chr5:94031167-94031226	NM_032290	Hs.657315
A_19_P00802179	-3.17782	-1.66804	3.17782	down			FALSE				57764576	chr12	57764517	-	hs|12q13.3		chr12:057764576-057764517
A_24_P943358	-3.17742	-1.66786	3.17742	down	DBF4	DBF4 zinc finger	FALSE	Homo sapiens DBF4 zinc finger (DBF4), mRNA [NM_006716]	10926	GO:0006260|GO:0000082|GO:0008270|GO:0005654|GO:0043085|GO:0008047|GO:0003676|GO:0000278	87538613	chr7	87538554	+	hs|7q21.12	NM_006716	chr7:87538554-87538613	NM_006716	Hs.485380
A_32_P207169	-3.17597	-1.6672	3.17597	down	SERTAD4-AS1	SERTAD4 antisense RNA 1	FALSE	Homo sapiens SERTAD4 antisense RNA 1 (SERTAD4-AS1), long non-coding RNA [NR_024337]	574036		210404928	chr1	210404869	-	hs|1q32.2	NR_024337	chr1:210404928-210404869	NR_024337	Hs.446946
A_19_P00319066	-3.17509	-1.6668	3.17509	down			FALSE	Homo sapiens, clone IMAGE:5466006, mRNA. [BC041064]			123139404	chr8	123139345	-	hs|8q24.13	BC041064	chr8:123139404-123139345
A_33_P3224324	-3.17384	-1.66623	3.17384	down	NOX4	NADPH oxidase 4	FALSE	Homo sapiens NADPH oxidase 4 (NOX4), transcript variant NOX4B, mRNA [NM_001143836]	50507	GO:0051897|GO:0048471|GO:0008285|GO:2000573|GO:0045453|GO:0050660|GO:0071560|GO:0071480|GO:0050667|GO:0014911|GO:0072341|GO:0005739|GO:0016324|GO:0006954|GO:0000166|GO:0016175|GO:0043406|GO:0016174|GO:0070374|GO:0071333|GO:0055007|GO:0042554|GO:0001666|GO:0001725|GO:0043065|GO:0007569|GO:0072593|GO:0005730|GO:0009055|GO:0000902|GO:0051496|GO:0019826|GO:0005789|GO:0016021|GO:0043020|GO:0071320|GO:…	89223692	chr11	89223633	-	hs|11q14.3	NM_001143836	chr11:89223692-89223633	NM_001143836	Hs.371036
A_32_P179746	-3.17257	-1.66565	3.17257	down	LOC101929687	uncharacterized LOC101929687	FALSE	PREDICTED: Homo sapiens uncharacterized LOC101929687 (LOC101929687), transcript variant X2, ncRNA [XR_427741]	101929687		94050532	chr5	94050473	+	hs|5q15	XR_427741	chr5:94050473-94050532	XR_427741
A_23_P31135	-3.17093	-1.66491	3.17093	down	ACAT2	acetyl-CoA acetyltransferase 2	FALSE	Homo sapiens acetyl-CoA acetyltransferase 2 (ACAT2), transcript variant 1, mRNA [NM_005891]	39	GO:0006629|GO:0005737|GO:0005730|GO:0003985|GO:0005654|GO:0005634|GO:0070062	160199873	chr6	160199814	+	hs|6q25.3	NM_005891	chr6:160199814-160199873	NM_005891	Hs.571037
A_33_P3217709	-3.17089	-1.66489	3.17089	down			FALSE	COBW domain containing 5 [Source:HGNC Symbol;Acc:HGNC:24584] [ENST00000476797]			42669730	chr9	42669671	+	hs|9p12	AK097639	chr9:42669671-42669730		Hs.355950
A_19_P00800990	-3.17064	-1.66478	3.17064	down			FALSE				133030286	chr2	133030227	-	hs|2q21.2		chr2:133030286-133030227
A_23_P59418	-3.17043	-1.66468	3.17043	down	NRF1	nuclear respiratory factor 1	FALSE	Homo sapiens nuclear respiratory factor 1 (NRF1), transcript variant 1, mRNA [NM_005011]	4899	GO:0001666|GO:0006996|GO:0006357|GO:0031100|GO:0044281|GO:0006091|GO:0000978|GO:0006351|GO:0051593|GO:0001077|GO:0005737|GO:0045944|GO:0051602|GO:0032496|GO:0005654|GO:0007005|GO:0032355|GO:0044255|GO:0070062	129395230	chr7	129395171	+	hs|7q32.2	NM_005011	chr7:129395171-129395230	NM_005011	Hs.654363
A_32_P140489	-3.16966	-1.66433	3.16966	down	GDF6	growth differentiation factor 6	FALSE	Homo sapiens growth differentiation factor 6 (GDF6), mRNA [NM_001001557]	392255	GO:0010862|GO:0006915|GO:0042981|GO:0030509|GO:0032924|GO:0060395|GO:0005125|GO:0005160|GO:0005615|GO:0042803|GO:0045666|GO:0043408|GO:0060389|GO:0048468|GO:0045893|GO:0008083|GO:0040007	97154669	chr8	97154610	-	hs|8q22.1	NM_001001557	chr8:97154669-97154610	NM_001001557	Hs.492277
A_19_P00803912	-3.16885	-1.66396	3.16885	down			FALSE				141710436	chr5	141710377	+	hs|5q31.3		chr5:141710377-141710436
A_23_P92202	-3.16678	-1.66302	3.16678	down	GMPPB	GDP-mannose pyrophosphorylase B	FALSE	Homo sapiens GDP-mannose pyrophosphorylase B (GMPPB), transcript variant 2, mRNA [NM_021971]	29925	GO:0005739|GO:0005737|GO:0009298|GO:0006488|GO:0005525|GO:0044267|GO:0004475|GO:0070062|GO:0043687|GO:0018279	49760101	chr3	49760042	-	hs|3p21.31	NM_021971	chr3:49760101-49760042	NM_021971	Hs.567488
A_24_P392690	-3.16269	-1.66115	3.16269	down			FALSE	acidic (leucine-rich) nuclear phosphoprotein 32 family, member B pseudogene 1 [Source:HGNC Symbol;Acc:HGNC:24267] [ENST00000568553]			75614126	chr15	75614114	-	hs|15q24.2		chr15:75614126-75614114
A_33_P3365002	-3.16255	-1.66109	3.16255	down	TUBB2A	tubulin, beta 2A class IIa	FALSE	Homo sapiens tubulin, beta 2A class IIa (TUBB2A), mRNA [NM_001069]	7280	GO:0051258|GO:0005874|GO:0003924|GO:0005634|GO:0005525|GO:0055085|GO:0031982|GO:0006184|GO:0005737|GO:0006457|GO:0005200|GO:0051084|GO:0007017|GO:0044267|GO:0070062	3154964	chr6	3154905	-	hs|6p25.2	NM_001069	chr6:3154964-3154905	NM_001069	Hs.654543
A_19_P00801556	-3.16076	-1.66027	3.16076	down			FALSE	Q6P5Q4_HUMAN (Q6P5Q4) LMOD2 protein (Fragment), partial (7%) [THC2634096]			60725287	chr5	60725228	-	hs|5q12.1		chr5:060725287-060725228
A_32_P21246	-3.15952	-1.65971	3.15952	down	HCG27	HLA complex group 27 (non-protein coding)	FALSE	Homo sapiens HLA complex group 27 (non-protein coding) (HCG27), long non-coding RNA [NR_026791]	253018		31171154	chr6	31171095	+	hs|6p21.33	NR_026791	chr6:31171095-31171154	NR_026791	Hs.659818
A_24_P241276	-3.1587	-1.65933	3.1587	down	EXOSC8	exosome component 8	FALSE	Homo sapiens exosome component 8 (EXOSC8), mRNA [NM_181503]	11340	GO:0005515|GO:0010467|GO:0006364|GO:0005730|GO:0004532|GO:0043928|GO:0005634|GO:0000178|GO:0005829|GO:0008150|GO:0005737|GO:0017091|GO:0000288	37583390	chr13	37583331	+	hs|13q13.3	NM_181503	chr13:37583331-37583390	NM_181503	Hs.294041
A_23_P416468	-3.15564	-1.65793	3.15564	down	PIF1	PIF1 5'-to-3' DNA helicase	FALSE	Homo sapiens PIF1 5'-to-3' DNA helicase (PIF1), transcript variant 2, mRNA [NM_025049]	80119	GO:0051974|GO:0043141|GO:0000287|GO:0010521|GO:0017116|GO:0042162|GO:0051880|GO:0006310|GO:0005524|GO:0005739|GO:0032211|GO:0006281|GO:0000723|GO:0032204|GO:0032508|GO:0000784|GO:0033682	65107975	chr15	65107916	-	hs|15q22.31	NM_025049	chr15:65107975-65107916	NM_025049	Hs.112160
A_33_P3214339	-3.1555	-1.65787	3.1555	down	PLCXD2	phosphatidylinositol-specific phospholipase C, X domain containing 2	FALSE	Homo sapiens phosphatidylinositol-specific phospholipase C, X domain containing 2 (PLCXD2), transcript variant 2, mRNA [NM_153268]	257068	GO:0016042|GO:0007165|GO:0008081|GO:0004871	111432892	chr3	111432833	+	hs|3q13.2	NM_153268	chr3:111432833-111432892	NM_153268	Hs.603252
A_23_P364107	-3.15524	-1.65775	3.15524	down	MIS18BP1	MIS18 binding protein 1	FALSE	Homo sapiens MIS18 binding protein 1 (MIS18BP1), mRNA [NM_018353]	55320	GO:0034080|GO:0005515|GO:0007067|GO:0003682|GO:0006334|GO:0005654|GO:0003677|GO:0000775|GO:0051301	45673272	chr14	45673213	-	hs|14q21.2	NM_018353	chr14:45673272-45673213	NM_018353	Hs.732769
A_23_P29303	-3.14866	-1.65474	3.14866	down	RRP7A	ribosomal RNA processing 7 homolog A (S. cerevisiae)	FALSE	Homo sapiens ribosomal RNA processing 7 homolog A (S. cerevisiae) (RRP7A), mRNA [NM_015703]	27341	GO:0000166|GO:0032545|GO:0006364|GO:0034456|GO:0000028	42915753	chr22	42914128	-	hs|22q13.2	NM_015703	chr22:42915753-42914128	NM_015703	Hs.745006
A_33_P3332006	-3.14501	-1.65306	3.14501	down	CBX1	chromobox homolog 1	FALSE	Homo sapiens chromobox homolog 1 (CBX1), transcript variant 1, mRNA [NM_006807]	10951	GO:0005515|GO:0010369|GO:0005819|GO:0042803|GO:0005720|GO:0001939|GO:0005721|GO:0003682|GO:0005654|GO:0001940|GO:0019899|GO:0045892|GO:0000785|GO:0000775	46147877	chr17	46147818	-	hs|17q21.32	NM_006807	chr17:46147877-46147818	NM_006807	Hs.77254
A_24_P67681	-3.14449	-1.65282	3.14449	down			FALSE	high mobility group box 3 pseudogene 27 [Source:HGNC Symbol;Acc:HGNC:39319] [ENST00000589177]			40800727	chr17	40800668	+	hs|17q21.2		chr17:40800668-40800727
A_24_P237927	-3.14302	-1.65215	3.14302	down	FAM102B	family with sequence similarity 102, member B	FALSE	Homo sapiens family with sequence similarity 102, member B (FAM102B), mRNA [NM_001010883]	284611		109172231	chr1	109171389	+	hs|1p13.3	NM_001010883	chr1:109171389-109172231	NM_001010883	Hs.200230
A_23_P53276	-3.14253	-1.65193	3.14253	down	TIMELESS	timeless circadian clock	FALSE	Homo sapiens timeless circadian clock (TIMELESS), mRNA [NM_003920]	8914	GO:0005515|GO:0000790|GO:0046982|GO:0030324|GO:0005730|GO:0005634|GO:0000122|GO:0042803|GO:0006351|GO:0006974|GO:0007067|GO:0009582|GO:0042127|GO:0009628|GO:0015630|GO:0042752|GO:0007623|GO:0048754|GO:0045892|GO:0002009|GO:0051301	56811004	chr12	56810945	-	hs|12q13.3	NM_003920	chr12:56811004-56810945	NM_003920	Hs.118631
A_33_P3278877	-3.14239	-1.65186	3.14239	down	ROBO2	roundabout, axon guidance receptor, homolog 2 (Drosophila)	FALSE	Homo sapiens roundabout, axon guidance receptor, homolog 2 (Drosophila) (ROBO2), transcript variant 5, mRNA [NM_001290065]	6092	GO:0031290|GO:0001656|GO:0005515|GO:0001657|GO:0021891|GO:0051964|GO:0009986|GO:0061364|GO:0007417|GO:0032870|GO:0042802|GO:0050925|GO:0007411|GO:0007420|GO:0016199|GO:0050772|GO:0016021|GO:0030673|GO:0007156|GO:0008046|GO:0070062	77629227	chr3	77629168	+	hs|3p12.3	NM_001290065	chr3:77629168-77629227	NM_001290065	Hs.13305
A_23_P164826	-3.14175	-1.65157	3.14175	down	RNASEH2A	ribonuclease H2, subunit A	FALSE	Homo sapiens ribonuclease H2, subunit A (RNASEH2A), mRNA [NM_006397]	10535	GO:0032299|GO:0006260|GO:0004523|GO:0003723|GO:0005634|GO:0004540|GO:0006298|GO:0046872|GO:0006401	12924335	chr19	12924276	+	hs|19p13.2	NM_006397	chr19:12924276-12924335	NM_006397	Hs.532851
A_33_P3641427	-3.13942	-1.6505	3.13942	down	MYEF2	myelin expression factor 2	FALSE	Homo sapiens myelin expression factor 2 (MYEF2), transcript variant 1, mRNA [NM_016132]	50804	GO:0014902|GO:0005737|GO:0000166|GO:0030182|GO:0005654|GO:0005634|GO:0003677|GO:0006351	48434932	chr15	48434873	-	hs|15q21.1	NM_016132	chr15:48434932-48434873	NM_016132	Hs.6638
A_24_P298174	-3.13912	-1.65036	3.13912	down	CBX1	chromobox homolog 1	FALSE	Homo sapiens chromobox homolog 1 (CBX1), transcript variant 1, mRNA [NM_006807]	10951	GO:0005515|GO:0010369|GO:0005819|GO:0042803|GO:0005720|GO:0001939|GO:0005721|GO:0003682|GO:0005654|GO:0001940|GO:0019899|GO:0045892|GO:0000785|GO:0000775	46153462	chr17	46153403	-	hs|17q21.32	NM_006807	chr17:46153462-46153403	NM_006807	Hs.77254
A_23_P5654	-3.13892	-1.65027	3.13892	down	IL37	interleukin 37	FALSE	Homo sapiens interleukin 37 (IL37), transcript variant 1, mRNA [NM_014439]	27178	GO:0006955|GO:0005737|GO:0005149|GO:0006954|GO:0019221|GO:0005730|GO:0005654|GO:0005634|GO:0005576|GO:0005615|GO:0005125|GO:0005829	113676308	chr2	113676249	+	hs|2q13	NM_014439	chr2:113676249-113676308	NM_014439	Hs.166371
A_33_P3708413	-3.13694	-1.64936	3.13694	down	MFAP5	microfibrillar associated protein 5	FALSE	Homo sapiens microfibrillar associated protein 5 (MFAP5), transcript variant 1, mRNA [NM_003480]	8076	GO:0030198|GO:0001527|GO:0005576|GO:0043206|GO:0005201	8800746	chr12	8800687	-	hs|12p13.31	NM_003480	chr12:8800746-8800687	NM_003480	Hs.512842
A_19_P00321868	-3.13659	-1.6492	3.13659	down			FALSE				208039527	chr1	208039468	-	hs|1q32.2		chr1:208039527-208039468
A_32_P397824	-3.13541	-1.64865	3.13541	down	FIGN	fidgetin	FALSE	Homo sapiens fidgetin (FIGN), mRNA [NM_018086]	55137	GO:0005815|GO:0005874|GO:0005634|GO:0031122|GO:0008022|GO:0005524|GO:0010569|GO:0016363|GO:0008568|GO:0005737|GO:0007067|GO:0008152|GO:0051301	164464661	chr2	164464602	-	hs|2q24.3	NM_018086	chr2:164464661-164464602	NM_018086	Hs.593650
A_33_P3407434	-3.13352	-1.64778	3.13352	down			FALSE	BX117604 Soares_fetal_liver_spleen_1NFLS_S1 Homo sapiens cDNA clone IMAGp998E051013, mRNA sequence [BX117604]			29902678	chr17	29902619	+	hs|17q11.2	BX117604	chr17:29902619-29902678		Hs.730299
A_23_P427645	-3.13319	-1.64763	3.13319	down	TLL1	tolloid-like 1	FALSE	Homo sapiens tolloid-like 1 (TLL1), transcript variant 1, mRNA [NM_012464]	7092	GO:0001501|GO:0022617|GO:0030198|GO:0005518|GO:0005509|GO:0006508|GO:0008270|GO:0005576|GO:0004222|GO:0030154	167024144	chr4	167024085	+	hs|4q32.3	NM_012464	chr4:167024085-167024144	NM_012464	Hs.106513
A_33_P3247848	-3.13114	-1.64669	3.13114	down	ZNF814	zinc finger protein 814	FALSE	Homo sapiens zinc finger protein 814 (ZNF814), mRNA [NM_001144989]	730051	GO:0005622|GO:0006355|GO:0003700|GO:0003676|GO:0046872	58380814	chr19	58380755	-	hs|19q13.43	NM_001144989	chr19:58380814-58380755	NM_001144989	Hs.634143
A_24_P65098	-3.12866	-1.64554	3.12866	down	TMEM87A	transmembrane protein 87A	FALSE	Homo sapiens transmembrane protein 87A (TMEM87A), transcript variant 2, mRNA [NM_001110503]	25963	GO:0016021	42551014	chr15	42550955	-	hs|15q15.1	NM_001110503	chr15:42551014-42550955	NM_001110503	Hs.744941
A_19_P00811711	-3.12819	-1.64533	3.12819	down			FALSE				184079805	chr2	184079746	+	hs|2q32.1		chr2:184079746-184079805
A_33_P3384845	-3.12705	-1.6448	3.12705	down	POFUT1	protein O-fucosyltransferase 1	FALSE	Homo sapiens protein O-fucosyltransferase 1 (POFUT1), transcript variant 2, mRNA [NM_172236]	23509	GO:0006355|GO:0005783|GO:0001756|GO:0008417|GO:0046922|GO:0016266|GO:0001525|GO:0009790|GO:0036066|GO:0007399|GO:0007507|GO:0006493|GO:0007219|GO:0016020|GO:0006004	30805725	chr20	30805666	+	hs|20q11.21	NM_172236	chr20:30805666-30805725	NM_172236	Hs.472409
A_33_P3282384	-3.12348	-1.64315	3.12348	down	SIMC1	SUMO-interacting motifs containing 1	FALSE	SUMO-interacting motifs containing 1 [Source:HGNC Symbol;Acc:HGNC:24779] [ENST00000429602]	375484	GO:0032184	175717703	chr5	175717644	+	hs|5q35.2	XM_005265909	chr5:175717644-175717703	XM_005265909	Hs.719847
A_23_P99747	-3.12153	-1.64225	3.12153	down	CDKL1	cyclin-dependent kinase-like 1 (CDC2-related kinase)	FALSE	Homo sapiens cyclin-dependent kinase-like 1 (CDC2-related kinase) (CDKL1), transcript variant 1, mRNA [NM_004196]	8814	GO:0007507|GO:0005737|GO:0051726|GO:0006468|GO:0005634|GO:0005524|GO:0070062|GO:0004693	50805745	chr14	50805686	-	hs|14q21.3	NM_004196	chr14:50805745-50805686	NM_004196	Hs.679430
A_23_P156408	-3.12104	-1.64202	3.12104	down	LINC00472	long intergenic non-protein coding RNA 472	FALSE	Homo sapiens long intergenic non-protein coding RNA 472 (LINC00472), transcript variant 1, long non-coding RNA [NR_121612]	79940		72124457	chr6	72124398	-	hs|6q13	NR_121612	chr6:72124457-72124398	NR_121612	Hs.368337
A_23_P436281	-3.11563	-1.63953	3.11563	down	HIST2H4B	histone cluster 2, H4b	FALSE	Homo sapiens histone cluster 2, H4b (HIST2H4B), mRNA [NM_001034077]	554313	GO:0005515|GO:0010467|GO:0006325|GO:0005634|GO:0045653|GO:0000723|GO:0000183|GO:0000786|GO:0070062|GO:0035574|GO:0035575|GO:0046982|GO:0006334|GO:0006335|GO:0005576|GO:0006336|GO:0000228|GO:0003677|GO:0032776|GO:0034080|GO:0043234|GO:0016020|GO:0045814|GO:0040029|GO:0005654|GO:0000278	149804455	chr1	149804396	+	hs|1q21.2	NM_001034077	chr1:149804396-149804455	NM_001034077	Hs.706635
A_23_P116264	-3.11318	-1.63839	3.11318	down	NRGN	neurogranin (protein kinase C substrate, RC3)	FALSE	Homo sapiens neurogranin (protein kinase C substrate, RC3) (NRGN), transcript variant 1, mRNA [NM_006176]	4900	GO:0035556|GO:0005622|GO:0007165|GO:0005516|GO:0007399	124616851	chr11	124616792	+	hs|11q24.2	NM_006176	chr11:124616792-124616851	NM_006176	Hs.524116
A_33_P3315979	-3.10692	-1.63549	3.10692	down	OR4Q3	olfactory receptor, family 4, subfamily Q, member 3	FALSE	Homo sapiens olfactory receptor, family 4, subfamily Q, member 3 (OR4Q3), mRNA [NM_172194]	441669	GO:0050911|GO:0050907|GO:0004984|GO:0007186|GO:0005886|GO:0004930|GO:0016021|GO:0004888	20216408	chr14	20216349	+	hs|14q11.2	NM_172194	chr14:20216349-20216408	NM_172194	Hs.553828
A_23_P13822	-3.10577	-1.63495	3.10577	down	STYK1	serine/threonine/tyrosine kinase 1	FALSE	Homo sapiens serine/threonine/tyrosine kinase 1 (STYK1), mRNA [NM_018423]	55359	GO:0005515|GO:0005886|GO:0045087|GO:0042127|GO:0005102|GO:0016021|GO:0038083|GO:0007169|GO:0005524|GO:0004715|GO:0030154|GO:0031234	10771913	chr12	10771854	-	hs|12p13.2	NM_018423	chr12:10771913-10771854	NM_018423	Hs.24979
A_19_P00329241	-3.10048	-1.63249	3.10048	down			FALSE				73053205	chrX	73053146	+	hs|Xq13.2		chrX:073053146-073053205
A_33_P3299865	-3.09797	-1.63132	3.09797	down	HIST1H4K	histone cluster 1, H4k	FALSE	Homo sapiens histone cluster 1, H4k (HIST1H4K), mRNA [NM_003541]	8362	GO:0005515|GO:0010467|GO:0006325|GO:0005634|GO:0045653|GO:0000723|GO:0000183|GO:0000786|GO:0070062|GO:0035574|GO:0035575|GO:0046982|GO:0006334|GO:0006335|GO:0005576|GO:0006336|GO:0000228|GO:0003677|GO:0032776|GO:0034080|GO:0043234|GO:0016020|GO:0045814|GO:0040029|GO:0005654|GO:0000278	27799148	chr6	27799089	-	hs|6p22.1	NM_003541	chr6:27799148-27799089	NM_003541	Hs.528055
A_32_P806841	-3.09787	-1.63128	3.09787	down	ARL4A	ADP-ribosylation factor-like 4A	FALSE	Homo sapiens ADP-ribosylation factor-like 4A (ARL4A), transcript variant 1, mRNA [NM_005738]	10124	GO:0005515|GO:0005737|GO:0005886|GO:0050873|GO:0007264|GO:0005730|GO:0005634|GO:0005525	12728514	chr7	12728454	+	hs|7p21.3	NM_005738	chr7:12728454-12728514	NM_005738	Hs.245540
A_33_P3407524	-3.0976	-1.63115	3.0976	down	SUV39H1	suppressor of variegation 3-9 homolog 1 (Drosophila)	FALSE	Homo sapiens suppressor of variegation 3-9 homolog 1 (Drosophila) (SUV39H1), transcript variant 1, mRNA [NM_001282166]	6839	GO:0005515|GO:0000792|GO:0010467|GO:0006364|GO:0006325|GO:0005634|GO:0030154|GO:0042054|GO:0036123|GO:0000183|GO:0036124|GO:0016032|GO:0000976|GO:0000794|GO:0071456|GO:0033553|GO:0008757|GO:0000122|GO:0006351|GO:0006974|GO:0018024|GO:0007049|GO:0047485|GO:0045814|GO:0003682|GO:0046974|GO:0005652|GO:0040029|GO:0005654|GO:0008270|GO:0048511|GO:0042754|GO:0045892|GO:0000775|GO:0005677	48565968	chrX	48565909	+	hs|Xp11.23	NM_001282166	chrX:48565909-48565968	NM_001282166	Hs.522639
A_23_P46309	-3.09141	-1.62826	3.09141	down	RCC1	regulator of chromosome condensation 1	FALSE	Homo sapiens regulator of chromosome condensation 1 (RCC1), transcript variant 4, mRNA [NM_001048199]	1104	GO:0005515|GO:0031965|GO:0000790|GO:0000794|GO:0007088|GO:0031492|GO:0005634|GO:0051225|GO:0032853|GO:0042393|GO:0000082|GO:0005737|GO:0007067|GO:0007059|GO:0003682|GO:0016032|GO:0005654|GO:0007052|GO:0005087|GO:0051301	28865107	chr1	28865048	+	hs|1p35.3	NM_001048199	chr1:28865048-28865107	NM_001048199	Hs.469723
A_23_P164814	-3.0911	-1.62812	3.0911	down	C19orf57	chromosome 19 open reading frame 57	FALSE	Homo sapiens chromosome 19 open reading frame 57 (C19orf57), mRNA [NM_024323]	79173	GO:0005515|GO:0003674|GO:0007275|GO:0005575	13993314	chr19	13993255	-	hs|19p13.13	NM_024323	chr19:13993314-13993255	NM_024323	Hs.143288
A_33_P3346338	-3.09085	-1.628	3.09085	down	TBC1D31	TBC1 domain family, member 31	FALSE	Homo sapiens TBC1 domain family, member 31 (TBC1D31), transcript variant 2, mRNA [NM_001145088]	93594	GO:0005813|GO:0032851|GO:0005097	124141441	chr8	124141382	+	hs|8q24.13	NM_001145088	chr8:124141382-124141441	NM_001145088	Hs.492716
A_23_P52531	-3.08838	-1.62685	3.08838	down	FAM24B	family with sequence similarity 24, member B	FALSE	Homo sapiens family with sequence similarity 24, member B (FAM24B), transcript variant 1, mRNA [NM_152644]	196792	GO:0005576	124609990	chr10	124608947	-	hs|10q26.13	NM_152644	chr10:124609990-124608947	NM_152644	Hs.114648
A_33_P3272140	-3.0879	-1.62663	3.0879	down	NUP35	nucleoporin 35kDa	FALSE	Homo sapiens nucleoporin 35kDa (NUP35), transcript variant 4, mRNA [NM_001287585]	129401	GO:0007077|GO:0010467|GO:0031965|GO:0005886|GO:0005975|GO:0019083|GO:0019221|GO:0019058|GO:0044281|GO:0005635|GO:0015031|GO:0055085|GO:0010827|GO:0043231|GO:0008645|GO:0015758|GO:0005643|GO:0009405|GO:0016032|GO:0005654|GO:0051028|GO:0045111|GO:0000278	184026146	chr2	184026087	+	hs|2q32.1	NM_001287585	chr2:184026087-184026146	NM_001287585	Hs.180591
A_23_P47704	-3.08368	-1.62465	3.08368	down	UCP2	uncoupling protein 2 (mitochondrial, proton carrier)	FALSE	Homo sapiens uncoupling protein 2 (mitochondrial, proton carrier) (UCP2), mRNA [NM_003355]	7351	GO:0001666|GO:0043066|GO:0007565|GO:0032869|GO:0007568|GO:0051881|GO:0005743|GO:0044281|GO:0022904|GO:0070542|GO:0006810|GO:0000303|GO:0016021|GO:0071333|GO:0061179|GO:0006839|GO:0010942|GO:0044237|GO:0015992|GO:0034198	73686141	chr11	73686082	-	hs|11q13.4	NM_003355	chr11:73686141-73686082	NM_003355	Hs.80658
A_33_P3359047	-3.08344	-1.62454	3.08344	down	LYPD6	LY6/PLAUR domain containing 6	FALSE	Homo sapiens LY6/PLAUR domain containing 6 (LYPD6), transcript variant 1, mRNA [NM_001195685]	130574	GO:0005576	150327534	chr2	150327475	+	hs|2q23.2	NM_001195685	chr2:150327475-150327534	NM_001195685	Hs.21929
A_24_P296568	-3.08245	-1.62408	3.08245	down	CBX1	chromobox homolog 1	FALSE	Homo sapiens chromobox homolog 1 (CBX1), transcript variant 1, mRNA [NM_006807]	10951	GO:0005515|GO:0010369|GO:0005819|GO:0042803|GO:0005720|GO:0001939|GO:0005721|GO:0003682|GO:0005654|GO:0001940|GO:0019899|GO:0045892|GO:0000785|GO:0000775	46147546	chr17	46147487	-	hs|17q21.32	NM_006807	chr17:46147546-46147487	NM_006807	Hs.77254
A_23_P64280	-3.07584	-1.62098	3.07584	down			FALSE	Homo sapiens clone DNA60283 IGYY565 (UNQ565) mRNA, complete cds. [AY358681]			124659533	chr11	124659474	-	hs|11q24.2	AY358681	chr11:124659533-124659474		Hs.661469
A_32_P54475	-3.07564	-1.62088	3.07564	down			FALSE	Synthetic construct Homo sapiens gateway clone IMAGE:100019426 3' read TUBB mRNA. [CU676483]			30210519	chr8	30210460	-	hs|8p12	CU676483	chr8:030210519-030210460		Hs.706246
A_33_P3389837	-3.07541	-1.62078	3.07541	down	GPN3	GPN-loop GTPase 3	FALSE	Homo sapiens GPN-loop GTPase 3 (GPN3), transcript variant 2, mRNA [NM_001164372]	51184	GO:0005515|GO:0043234|GO:0016787|GO:0008152|GO:0005525	110890465	chr12	110890406	-	hs|12q24.11	NM_001164372	chr12:110890465-110890406	NM_001164372	Hs.634680
A_24_P141629	-3.07311	-1.6197	3.07311	down	FAM111A	family with sequence similarity 111, member A	FALSE	Homo sapiens family with sequence similarity 111, member A (FAM111A), transcript variant 1, mRNA [NM_022074]	63901	GO:0006260|GO:0005515|GO:0051607|GO:0005737|GO:0016032|GO:0005634|GO:0003824|GO:0000785|GO:0045071	58921694	chr11	58921635	+	hs|11q12.1	NM_022074	chr11:58921635-58921694	NM_022074	Hs.150651
A_33_P3349536	-3.07209	-1.61922	3.07209	down	CHEK1	checkpoint kinase 1	FALSE	Homo sapiens checkpoint kinase 1 (CHEK1), transcript variant 2, mRNA [NM_001114121]	1111	GO:0005515|GO:0005657|GO:0031572|GO:0005634|GO:0005615|GO:0010569|GO:0043231|GO:0005829|GO:0042127|GO:0000086|GO:0018107|GO:2000615|GO:0010767|GO:0000785|GO:0005813|GO:0000794|GO:0000781|GO:0046602|GO:0071313|GO:0035407|GO:0005524|GO:0006974|GO:0035402|GO:0006975|GO:0006260|GO:0045839|GO:0006281|GO:0010972|GO:0004674|GO:2000279|GO:0005654|GO:0000077|GO:0090399|GO:0071260|GO:0048096	125525217	chr11	125525158	+	hs|11q24.2	NM_001114121	chr11:125525158-125525217	NM_001114121	Hs.24529
A_24_P1255	-3.07088	-1.61865	3.07088	down	BCCIP	BRCA2 and CDKN1A interacting protein	FALSE	Homo sapiens BRCA2 and CDKN1A interacting protein (BCCIP), transcript variant C, mRNA [NM_078469]	56647	GO:0005515|GO:0007049|GO:0019908|GO:0006281|GO:0061101|GO:0005634|GO:0000079|GO:0019207	127530439	chr10	127530380	+	hs|10q26.2	NM_078469	chr10:127530380-127530439	NM_078469	Hs.715543
A_23_P26777	-3.07044	-1.61844	3.07044	down	NUP85	nucleoporin 85kDa	FALSE	Homo sapiens nucleoporin 85kDa (NUP85), transcript variant 1, mRNA [NM_024844]	79902	GO:0007077|GO:0005515|GO:0010467|GO:0019221|GO:0030032|GO:0019058|GO:0005635|GO:0044281|GO:0015031|GO:0008645|GO:0005829|GO:0015758|GO:0016032|GO:0031965|GO:0005975|GO:0019083|GO:0005819|GO:0055085|GO:0010827|GO:0016020|GO:0031080|GO:0009405|GO:0000777|GO:0000776|GO:0051028|GO:0048246|GO:0000278	73231242	chr17	73230872	+	hs|17q25.1	NM_024844	chr17:73230872-73231242	NM_024844	Hs.362817
A_19_P00317520	-3.07007	-1.61827	3.07007	down			FALSE	Homo sapiens full length insert cDNA clone ZD83B06. [AF086452]			45942990	chr13	45942931	+	hs|13q14.13	AF086452	chr13:45942931-45942990		Hs.633769
A_23_P152768	-3.06658	-1.61663	3.06658	down	TUBG1	tubulin, gamma 1	FALSE	Homo sapiens tubulin, gamma 1 (TUBG1), mRNA [NM_001070]	7283	GO:0005515|GO:0005827|GO:0005881|GO:0003924|GO:0031122|GO:0000212|GO:0036064|GO:0005829|GO:0005737|GO:0000086|GO:0000930|GO:0000242|GO:0031252|GO:0005813|GO:0000794|GO:0006996|GO:0005814|GO:0000226|GO:0045177|GO:0031513|GO:0005525|GO:0006184|GO:0007020|GO:0005200|GO:0055037|GO:0000278	40765081	chr17	40765022	+	hs|17q21.2	NM_001070	chr17:40765022-40765081	NM_001070	Hs.279669
A_33_P3415843	-3.06487	-1.61583	3.06487	down			FALSE	BT006801 carnitine acetyltransferase {Homo sapiens} (exp=-1; wgp=0; cg=0), partial (18%) [THC2667880]			131869680	chr9	131869621	-	hs|9q34.11		chr9:131869680-131869621
A_23_P17393	-3.06429	-1.61555	3.06429	down	CSE1L	CSE1 chromosome segregation 1-like (yeast)	FALSE	Homo sapiens CSE1 chromosome segregation 1-like (yeast) (CSE1L), transcript variant 1, mRNA [NM_001316]	1434	GO:0005515|GO:0005737|GO:0016020|GO:0008283|GO:0008536|GO:0006611|GO:0006915|GO:0005654|GO:0005634|GO:0008262|GO:0070062	47713009	chr20	47712950	+	hs|20q13.13	NM_001316	chr20:47712950-47713009	NM_001316	Hs.90073
A_19_P00326763	-3.0603	-1.61367	3.0603	down	LINC01279	long intergenic non-protein coding RNA 1279	FALSE	Homo sapiens long intergenic non-protein coding RNA 1279 (LINC01279), long non-coding RNA [NR_109779]	100506621		112315731	chr3	112315672	-	hs|3q13.2	NR_109779	chr3:112315731-112315672	NR_109779
A_33_P3329352	-3.05961	-1.61335	3.05961	down			FALSE	high mobility group nucleosomal binding domain 2 pseudogene 36 [Source:HGNC Symbol;Acc:HGNC:39407] [ENST00000529541]			13632237	chr11	13632178	-	hs|11p15.2		chr11:13632237-13632178
A_32_P119197	-3.05878	-1.61296	3.05878	down	TPM3	tropomyosin 3	FALSE	Homo sapiens tropomyosin 3 (TPM3), transcript variant Tpm3.7, mRNA [NM_001043352]	7170	GO:0001725|GO:0005862|GO:0030049|GO:0002102|GO:0006928|GO:0003779|GO:0032154|GO:0005829|GO:0030426|GO:0003674|GO:0006936|GO:0031941|GO:0030863|GO:0005856|GO:0070062	154128004	chr1	154127945	-	hs|1q21.3	NM_001043352	chr1:154128004-154127945	NM_001043352	Hs.644306
A_33_P3343290	-3.0585	-1.61282	3.0585	down	PPTC7	PTC7 protein phosphatase homolog (S. cerevisiae)	FALSE	Homo sapiens PTC7 protein phosphatase homolog (S. cerevisiae) (PPTC7), mRNA [NM_139283]	160760	GO:0005739|GO:0016311|GO:0004721|GO:0046872	110974621	chr12	110974562	-	hs|12q24.11	NM_139283	chr12:110974621-110974562	NM_139283	Hs.13854
A_33_P3344086	-3.04974	-1.60869	3.04974	down	HIST1H2AJ	histone cluster 1, H2aj	FALSE	Homo sapiens histone cluster 1, H2aj (HIST1H2AJ), mRNA [NM_021066]	8331		27782191	chr6	27782132	-	hs|6p22.1	NM_021066	chr6:27782191-27782132	NM_021066	Hs.406691
A_33_P3386219	-3.04934	-1.6085	3.04934	down	DCLRE1C	DNA cross-link repair 1C	FALSE	Homo sapiens DNA cross-link repair 1C (DCLRE1C), transcript variant h, mRNA [NM_001289079]	64421	GO:0033151|GO:0008409|GO:0090305|GO:0000723|GO:0010212|GO:0030183|GO:0000014|GO:0005634|GO:0000737|GO:0006302	14976762	chr10	14976703	-	hs|10p13	NM_001289079	chr10:14976762-14976703	NM_001289079	Hs.656065
A_33_P3272828	-3.04871	-1.6082	3.04871	down	RAD1	RAD1 checkpoint DNA exonuclease	FALSE	Homo sapiens RAD1 checkpoint DNA exonuclease (RAD1), transcript variant 1, mRNA [NM_002853]	5810	GO:0005515|GO:0008408|GO:0030896|GO:0090305|GO:0005694|GO:0005634|GO:0071479|GO:0006974|GO:0043231|GO:0003684|GO:0006260|GO:0006281|GO:0008853|GO:0021762|GO:0051598|GO:0005654|GO:0000077|GO:0000738	34914859	chr5	34914800	-	hs|5p13.2	NM_002853	chr5:34914859-34914800	NM_002853	Hs.38114
A_33_P3355208	-3.04747	-1.60761	3.04747	down	CROT	carnitine O-octanoyltransferase	FALSE	Homo sapiens carnitine O-octanoyltransferase (CROT), transcript variant 3, mRNA [NM_001243745]	54677	GO:0006635|GO:0005782|GO:0005102|GO:0044281|GO:0006091|GO:0008458|GO:0015936|GO:0043231|GO:0005739|GO:0006631|GO:0051791|GO:0015908|GO:0033540|GO:0009437|GO:0044255|GO:0005777	86989425	chr7	86989366	+	hs|7q21.12	NM_001243745	chr7:86989366-86989425	NM_001243745	Hs.125039
A_33_P3387115	-3.0456	-1.60672	3.0456	down			FALSE	Homo sapiens, clone IMAGE:3961600, mRNA. [BC021693]			198639504	chr2	198639445	+	hs|2q33.1	BC021693	chr2:198639445-198639504		Hs.676585
A_19_P00805678	-3.04288	-1.60544	3.04288	down			FALSE				10989	chrUn_gl000222	10930	+			chrUn_gl000222:000010930-000010989
A_24_P49747	-3.04264	-1.60532	3.04264	down			FALSE	high mobility group box 3 pseudogene 24 [Source:HGNC Symbol;Acc:HGNC:39316] [ENST00000433260]			36303660	chr9	36303601	-	hs|9p13.2		chr9:36303660-36303601
A_24_P173746	-3.04256	-1.60529	3.04256	down	RALGPS2	Ral GEF with PH domain and SH3 binding motif 2	FALSE	Homo sapiens Ral GEF with PH domain and SH3 binding motif 2 (RALGPS2), transcript variant 10, mRNA [NM_152663]	55103	GO:0043547|GO:0005085|GO:0005737|GO:0005886|GO:0007264	178871278	chr1	178866870	+	hs|1q25.2	NM_152663	chr1:178866870-178871278	NM_152663	Hs.632485
A_24_P234415	-3.0423	-1.60516	3.0423	down	STAC	SH3 and cysteine rich domain	FALSE	Homo sapiens SH3 and cysteine rich domain (STAC), transcript variant 1, mRNA [NM_003149]	6769	GO:0035556|GO:0034605|GO:0005515|GO:0007165|GO:0046872|GO:0005829	36588838	chr3	36588779	+	hs|3p22.2	NM_003149	chr3:36588779-36588838	NM_003149	Hs.56045
A_19_P00811807	-3.04183	-1.60494	3.04183	down	TOMM5	translocase of outer mitochondrial membrane 5 homolog (yeast)	FALSE	translocase of outer mitochondrial membrane 5 homolog (yeast) [Source:HGNC Symbol;Acc:HGNC:31369] [ENST00000540941]	401505	GO:0005739|GO:0008565|GO:0006626|GO:0005742|GO:0016021|GO:0044267	37582802	chr9	37582743	-	hs|9p13.2	CR627326	chr9:37582802-37582743		Hs.130774
A_33_P3308446	-3.03954	-1.60385	3.03954	down	RHOB	ras homolog family member B	FALSE	ras homolog family member B [Source:HGNC Symbol;Acc:HGNC:668] [ENST00000272233]	388	GO:0005515|GO:0070301|GO:0005886|GO:0007264|GO:0006927|GO:0003924|GO:0005634|GO:0007266|GO:0006886|GO:0032154|GO:0005829|GO:0000910|GO:0007411|GO:0007155|GO:0070062|GO:0051056|GO:0043065|GO:0008333|GO:0006915|GO:0030168|GO:0001525|GO:0045786|GO:0005525|GO:0071479|GO:0045766|GO:0007596|GO:0008152|GO:0031902|GO:0019003|GO:0005925|GO:0005769|GO:0010008	20649030	chr2	20648971	+	hs|2p24.1	AK124398	chr2:20648971-20649030		Hs.502876
A_23_P100632	-3.03399	-1.60121	3.03399	down	HN1	hematological and neurological expressed 1	FALSE	Homo sapiens hematological and neurological expressed 1 (HN1), transcript variant 3, mRNA [NM_001002033]	51155	GO:0032502|GO:0005634	73132162	chr17	73132103	-	hs|17q25.1	NM_001002033	chr17:73132162-73132103	NM_001002033	Hs.532803
A_32_P93996	-3.0338	-1.60113	3.0338	down	LOC100128361	uncharacterized LOC100128361	FALSE	Homo sapiens uncharacterized LOC100128361 (LOC100128361), long non-coding RNA [NR_036505]	100128361		95382307	chr9	95382248	+	hs|9q22.31	NR_036505	chr9:95382248-95382307	NR_036505	Hs.660395
A_33_P3227556	-3.02921	-1.59894	3.02921	down			FALSE				668847	chr5	668788	+	hs|5p15.33		chr5:000668788-000668847
A_33_P3419998	-3.02826	-1.59849	3.02826	down	SLC4A8	solute carrier family 4, sodium bicarbonate cotransporter, member 8	FALSE	Homo sapiens solute carrier family 4, sodium bicarbonate cotransporter, member 8 (SLC4A8), transcript variant 1, mRNA [NM_001039960]	9498	GO:0043005|GO:0005886|GO:0005452|GO:0005887|GO:0051453|GO:0015701|GO:0035725|GO:0055085|GO:0008510|GO:0032809|GO:0006811	51902980	chr12	51902921	+	hs|12q13.13	NM_001039960	chr12:51902921-51902980	NM_001039960	Hs.4749
A_23_P135326	-3.02607	-1.59745	3.02607	down	POLE3	polymerase (DNA directed), epsilon 3, accessory subunit	FALSE	Homo sapiens polymerase (DNA directed), epsilon 3, accessory subunit (POLE3), transcript variant 1, mRNA [NM_017443]	54107	GO:0043565|GO:0006260|GO:0005515|GO:0008622|GO:0071897|GO:0046982|GO:0043966|GO:0003887|GO:0005671|GO:0005634	116169769	chr9	116169710	-	hs|9q32	NM_017443	chr9:116169769-116169710	NM_017443	Hs.108112
A_32_P172864	-3.02468	-1.59678	3.02468	down	FAM102B	family with sequence similarity 102, member B	FALSE	Homo sapiens family with sequence similarity 102, member B (FAM102B), mRNA [NM_001010883]	284611		109181681	chr1	109181622	+	hs|1p13.3	NM_001010883	chr1:109181622-109181681	NM_001010883	Hs.200230
A_23_P216448	-3.02363	-1.59628	3.02363	down	NFIB	nuclear factor I/B	FALSE	Homo sapiens nuclear factor I/B (NFIB), transcript variant 3, mRNA [NM_005596]	4781	GO:0021960|GO:0006366|GO:0000981|GO:0071679|GO:0005634|GO:0060509|GO:2000795|GO:0003690|GO:0002062|GO:0061141|GO:0021740|GO:0045944|GO:2000791|GO:0001106|GO:0044300|GO:0005730|GO:0000122|GO:0000978|GO:0003677|GO:0043392|GO:0006260|GO:0001077|GO:0010001|GO:0060486|GO:0005654|GO:0060510|GO:0030902	14088270	chr9	14088211	-	hs|9p23	NM_005596	chr9:14088270-14088211	NM_005596	Hs.644095
A_33_P3235217	-3.02295	-1.59596	3.02295	down	CTPS1	CTP synthase 1	FALSE	Homo sapiens CTP synthase 1 (CTPS1), transcript variant 1, mRNA [NM_001905]	1503	GO:0006241|GO:0015949|GO:0042493|GO:0055086|GO:0044281|GO:0005524|GO:0005829|GO:0006139|GO:0016020|GO:0042098|GO:0042100|GO:0003883|GO:0044210|GO:0006541	41475925	chr1	41475866	+	hs|1p34.2	NM_001905	chr1:41475866-41475925	NM_001905	Hs.473087
A_19_P00803360	-3.01865	-1.5939	3.01865	down	LOC730101	uncharacterized LOC730101	FALSE	Homo sapiens uncharacterized LOC730101 (LOC730101), transcript variant 1, long non-coding RNA [NR_024403]	730101		52531377	chr6	52531318	+	hs|6p12.2	NR_024403	chr6:52531318-52531377	NR_024403	Hs.7921
A_24_P299318	-3.0161	-1.59268	3.0161	down	FAM101B	family with sequence similarity 101, member B	FALSE	Homo sapiens family with sequence similarity 101, member B (FAM101B), mRNA [NM_182705]	359845	GO:0005737|GO:0030036|GO:0031005|GO:0001837|GO:0015629	289939	chr17	289880	-	hs|17p13.3	NM_182705	chr17:289939-289880	NM_182705	Hs.741149
A_33_P3334635	-3.01559	-1.59244	3.01559	down	RPA2	replication protein A2, 32kDa	FALSE	Homo sapiens replication protein A2, 32kDa (RPA2), transcript variant 2, mRNA [NM_001286076]	6118	GO:0005515|GO:2000001|GO:0005634|GO:0010569|GO:0006302|GO:0034605|GO:0000082|GO:0006271|GO:0003697|GO:0000723|GO:0000724|GO:0000722|GO:0006297|GO:0006298|GO:0005662|GO:0031625|GO:0000781|GO:0019903|GO:0035861|GO:0003684|GO:0006260|GO:0047485|GO:0006281|GO:0006283|GO:0000730|GO:0006284|GO:0016605|GO:0005654|GO:0031571|GO:0006289|GO:0019899|GO:0000718|GO:0000278|GO:0032201|GO:1900034	28218648	chr1	28218589	-	hs|1p35.3	NM_001286076	chr1:28218648-28218589	NM_001286076	Hs.79411
A_24_P337239	-3.01427	-1.59181	3.01427	down	FGF5	fibroblast growth factor 5	FALSE	Homo sapiens fibroblast growth factor 5 (FGF5), transcript variant 1, mRNA [NM_004464]	2250	GO:0008286|GO:0048011|GO:0008284|GO:0008283|GO:0023019|GO:0048015|GO:0007267|GO:0005104|GO:0005576|GO:0005615|GO:0007399|GO:0007173|GO:0008543|GO:0045087|GO:0010001|GO:0051781|GO:0008083|GO:0038095	81211166	chr4	81211110	+	hs|4q21.21	NM_004464	chr4:81211110-81211166	NM_004464	Hs.37055
A_33_P3423631	-3.01151	-1.59049	3.01151	down	WHSC1	Wolf-Hirschhorn syndrome candidate 1	FALSE	Homo sapiens Wolf-Hirschhorn syndrome candidate 1 (WHSC1), transcript variant 8, mRNA [NM_007331]	7468	GO:2001032|GO:0005515|GO:0003289|GO:0034770|GO:0005694|GO:0048298|GO:0010452|GO:0006325|GO:0005634|GO:0000122|GO:0009653|GO:0003290|GO:0006351|GO:0018024|GO:0043565|GO:0060348|GO:0005737|GO:0003149|GO:0003682|GO:0070201|GO:0005654|GO:0008270	1944128	chr4	1944069	+	hs|4p16.3	NM_007331	chr4:1944069-1944128	NM_007331	Hs.113876
A_24_P109633	-3.01103	-1.59026	3.01103	down	ITPK1	inositol-tetrakisphosphate 1-kinase	FALSE	Homo sapiens inositol-tetrakisphosphate 1-kinase (ITPK1), transcript variant 3, mRNA [NM_001142594]	3705	GO:0052835|GO:0052825|GO:0000287|GO:0043647|GO:0052725|GO:0044281|GO:0003824|GO:0005524|GO:0052831|GO:0052830|GO:0052726|GO:0005829|GO:0007165|GO:0016310|GO:0007596|GO:0032957|GO:0016311|GO:0016853|GO:0047325	93403377	chr14	93403318	-	hs|14q32.12	NM_001142594	chr14:93403377-93403318	NM_001142594	Hs.308122
A_23_P408996	-3.00831	-1.58895	3.00831	down	MBOAT1	membrane bound O-acyltransferase domain containing 1	FALSE	Homo sapiens membrane bound O-acyltransferase domain containing 1 (MBOAT1), transcript variant 1, mRNA [NM_001080480]	154141	GO:0036150|GO:0016747|GO:0005789|GO:0044281|GO:0016021|GO:0006644|GO:0046474|GO:0036152	20101206	chr6	20101147	-	hs|6p22.3	NM_001080480	chr6:20101206-20101147	NM_001080480	Hs.377830
A_33_P3261024	-3.00655	-1.58811	3.00655	down			FALSE				137520411	chr6	137520352	+	hs|6q23.3		chr6:137520352-137520411
A_33_P3283320	-3.0065	-1.58808	3.0065	down	OR6F1	olfactory receptor, family 6, subfamily F, member 1	FALSE	Homo sapiens olfactory receptor, family 6, subfamily F, member 1 (OR6F1), mRNA [NM_001005286]	343169	GO:0050911|GO:0004984|GO:0007186|GO:0005886|GO:0004930|GO:0016021	247875191	chr1	247875132	-	hs|1q44	NM_001005286	chr1:247875191-247875132	NM_001005286	Hs.591529
A_33_P3210278	-3.00601	-1.58785	3.00601	down	SYNE2	spectrin repeat containing, nuclear envelope 2	FALSE	Homo sapiens spectrin repeat containing, nuclear envelope 2 (SYNE2), transcript variant 5, mRNA [NM_182914]	23224	GO:0005515|GO:0030018|GO:0034504|GO:0007097|GO:0031527|GO:0034993|GO:0005634|GO:0090286|GO:0005635|GO:0005739|GO:0005640|GO:0010761|GO:0051642|GO:0005737|GO:0051015|GO:0031022|GO:0006998|GO:0045111|GO:0070062|GO:0031965|GO:0030335|GO:0016235|GO:0031258|GO:0033017|GO:0003779|GO:0031981|GO:0007163|GO:0016529|GO:0005654|GO:0016021|GO:0005925	64693134	chr14	64693075	+	hs|14q23.2	NM_182914	chr14:64693075-64693134	NM_182914	Hs.745014
A_23_P353717	-3.00397	-1.58687	3.00397	down	RMI2	RecQ mediated genome instability 2	FALSE	Homo sapiens RecQ mediated genome instability 2 (RMI2), mRNA [NM_152308]	116028	GO:0006260|GO:0005737|GO:0005634|GO:0003677	11445443	chr16	11445384	+	hs|16p13.13	NM_152308	chr16:11445384-11445443	NM_152308	Hs.347524
A_23_P33613	-3.00296	-1.58639	3.00296	down	DCTPP1	dCTP pyrophosphatase 1	FALSE	Homo sapiens dCTP pyrophosphatase 1 (DCTPP1), mRNA [NM_024096]	79077	GO:0032556|GO:0000287|GO:0051289|GO:0047429|GO:0009143|GO:0047840|GO:0005829	30435368	chr16	30435309	-	hs|16p11.2	NM_024096	chr16:30435368-30435309	NM_024096	Hs.632191
A_32_P222961	-3.00289	-1.58635	3.00289	down	SPIN4	spindlin family, member 4	FALSE	Homo sapiens spindlin family, member 4 (SPIN4), mRNA [NM_001012968]	139886	GO:0007276	62567175	chrX	62567116	-	hs|Xq11.1	NM_001012968	chrX:62567175-62567116	NM_001012968	Hs.612782
A_19_P00320572	-3.00279	-1.5863	3.00279	down			FALSE	Homo sapiens chromosome 10 isolate HA_003627 mRNA sequence. [EF565130]			6829967	chr10	6829908	+	hs|10p14	EF565130	chr10:6829908-6829967		Hs.695839
A_23_P36825	-3.0024	-1.58611	3.0024	down	GPRC5A	G protein-coupled receptor, class C, group 5, member A	FALSE	Homo sapiens G protein-coupled receptor, class C, group 5, member A (GPRC5A), mRNA [NM_003979]	9052	GO:0007165|GO:0007186|GO:0005886|GO:0005887|GO:0004930|GO:0030659|GO:0070062|GO:0043231	13065766	chr12	13065707	+	hs|12p13.1	NM_003979	chr12:13065707-13065766	NM_003979	Hs.631733
A_19_P00800166	-3.00208	-1.58596	3.00208	down	LINC01116	long intergenic non-protein coding RNA 1116	FALSE	Homo sapiens long intergenic non-protein coding RNA 1116 (LINC01116), long non-coding RNA [NR_040001]	375295		177494377	chr2	177494318	-	hs|2q31.1	NR_040001	chr2:177494377-177494318	NR_040001	Hs.636452
A_32_P76060	-3.00097	-1.58543	3.00097	down	CTDSPL2	CTD (carboxy-terminal domain, RNA polymerase II, polypeptide A) small phosphatase like 2	FALSE	Homo sapiens CTD (carboxy-terminal domain, RNA polymerase II, polypeptide A) small phosphatase like 2 (CTDSPL2), mRNA [NM_016396]	51496	GO:0016311|GO:0004721	44819425	chr15	44819366	+	hs|15q21.1	NM_016396	chr15:44819366-44819425	NM_016396	Hs.497967
A_33_P3543013	-2.99958	-1.58476	2.99958	down	OR5AK4P	olfactory receptor, family 5, subfamily AK, member 4 pseudogene	FALSE	Homo sapiens olfactory-like receptor (PJCG3) pseudogene, mRNA sequence. [AF309700]	219525		56805875	chr11	56805816	+	hs|11q12.1	AF309700	chr11:56805816-56805875		Hs.554519
A_33_P3381796	-2.99762	-1.58382	2.99762	down			FALSE				157233772	chr7	157233713	-	hs|7q36.3		chr7:157233772-157233713
A_33_P3272558	-2.99713	-1.58358	2.99713	down	NCAPH2	non-SMC condensin II complex, subunit H2	FALSE	Homo sapiens non-SMC condensin II complex, subunit H2 (NCAPH2), transcript variant 3, mRNA [NM_001185011]	29781	GO:0005515|GO:0016020|GO:0030261|GO:0005694|GO:0005654|GO:0000278	50961915	chr22	50961856	+	hs|22q13.33	NM_001185011	chr22:50961856-50961915	NM_001185011	Hs.730607
A_33_P3297255	-2.99671	-1.58338	2.99671	down	MXD3	MAX dimerization protein 3	FALSE	Homo sapiens MAX dimerization protein 3 (MXD3), transcript variant 1, mRNA [NM_031300]	83463	GO:0046983|GO:0005634|GO:0045892|GO:0003677|GO:0006351	176734275	chr5	176734216	-	hs|5q35.3	NM_031300	chr5:176734275-176734216	NM_031300	Hs.743332
A_33_P3242965	-2.99574	-1.58291	2.99574	down	ATAD3C	ATPase family, AAA domain containing 3C	FALSE	Homo sapiens ATPase family, AAA domain containing 3C (ATAD3C), mRNA [NM_001039211]	219293	GO:0005524	1396296	chr1	1396237	+	hs|1p36.33	NM_001039211	chr1:1396237-1396296	NM_001039211	Hs.724767
A_23_P45087	-2.99356	-1.58186	2.99356	down	ZNF107	zinc finger protein 107	FALSE	Homo sapiens zinc finger protein 107 (ZNF107), transcript variant 1, mRNA [NM_016220]	51427	GO:0008150|GO:0003674|GO:0006355|GO:0005634|GO:0005575|GO:0003677|GO:0046872|GO:0006351	64171236	chr7	64171177	+	hs|7q11.21	NM_016220	chr7:64171177-64171236	NM_016220	Hs.732661
A_19_P00326935	-2.99089	-1.58057	2.99089	down			FALSE				128147183	chr3	128147124	-	hs|3q21.3		chr3:128147183-128147124
[truncated: 1,489 more rows]
